# Supplementary material
Source: PubMed Central journal article supplement (PMC4111734)
Supplement: rna-10-943-s01.pdf [file rna-10-943-s01.pdf]

## **Supplemental Material to:**

**Anastassia V. Komarova, Chantal Combredet,  
Odile Sismeiro, Marie-Agnès Dillies, Bernd Jagla,  
Raul Y. Sanchez David, Nicolas Vabret, Jean-Yves Coppee,  
Pierre-Olivier Vidalain and Frédéric Tangy**

**Identification of RNA partners of viral  
proteins in infected cells**

**2013; 10(4)**

**<http://dx.doi.org/10.4161/rna.24453>**

**[www.landesbioscience.com/journals/rnabiology/article/24453/](http://www.landesbioscience.com/journals/rnabiology/article/24453/)**

**Supplementary Table 1 Normalized read counts at all positions of MV genome**

| <b>genome</b> | <b>base</b> | <b>position</b> | <b>MV-N/RNA (A)</b> | <b>CH/RNA (B)</b> | <b>adjpAB</b>        |
|---------------|-------------|-----------------|---------------------|-------------------|----------------------|
| MV_Schw       | A           | 1               | 4                   | 0                 | 1                    |
| MV_Schw       | C           | 2               | 4                   | 0                 | 1                    |
| MV_Schw       | C           | 3               | 2                   | 0                 | 1                    |
| MV_Schw       | A           | 4               | 2                   | 0                 | 1                    |
| MV_Schw       | NA          | 5               | 0                   | 0                 | NA                   |
| MV_Schw       | NA          | 6               | 0                   | 0                 | NA                   |
| MV_Schw       | NA          | 7               | 0                   | 0                 | NA                   |
| MV_Schw       | NA          | 8               | 0                   | 0                 | NA                   |
| MV_Schw       | NA          | 9               | 0                   | 0                 | NA                   |
| MV_Schw       | A           | 10              | 2                   | 0                 | 1                    |
| MV_Schw       | G           | 11              | 23                  | 0                 | 1                    |
| MV_Schw       | T           | 12              | 2                   | 0                 | 1                    |
| MV_Schw       | T           | 13              | 2                   | 0                 | 1                    |
| MV_Schw       | G           | 14              | 4                   | 0                 | 1                    |
| MV_Schw       | G           | 15              | 6                   | 0                 | 1                    |
| MV_Schw       | G           | 16              | 12                  | 0                 | 1                    |
| MV_Schw       | T           | 17              | 23                  | 0                 | 1                    |
| MV_Schw       | A           | 18              | 8                   | 0                 | 1                    |
| MV_Schw       | A           | 19              | 8                   | 0                 | 1                    |
| MV_Schw       | G           | 20              | 488                 | 3                 | 0.0191997322596453   |
| MV_Schw       | G           | 21              | 271                 | 1                 | 0.0497714824581606   |
| MV_Schw       | A           | 22              | 50                  | 0                 | 0.950262622850522    |
| MV_Schw       | T           | 23              | 21                  | 0                 | 1                    |
| MV_Schw       | A           | 24              | 52                  | 0                 | 0.950262622850522    |
| MV_Schw       | G           | 25              | 1886                | 4                 | 5.56069654257243e-16 |
| MV_Schw       | T           | 26              | 101                 | 1                 | 1                    |
| MV_Schw       | T           | 27              | 10                  | 0                 | 1                    |
| MV_Schw       | C           | 28              | 337                 | 0                 | 0.00131350930751039  |
| MV_Schw       | A           | 29              | 149                 | 1                 | 0.88950624150852     |
| MV_Schw       | A           | 30              | 174                 | 1                 | 0.344829637188882    |
| MV_Schw       | T           | 31              | 56                  | 0                 | 0.950262622850522    |
| MV_Schw       | C           | 32              | 607                 | 0                 | 4.48165858664599e-07 |
| MV_Schw       | A           | 33              | 23                  | 0                 | 1                    |
| MV_Schw       | A           | 34              | 10                  | 0                 | 1                    |

|         |    |    |     |   |                    |
|---------|----|----|-----|---|--------------------|
| MV_Schw | T  | 35 | 143 | 0 | 0.161503851613234  |
| MV_Schw | G  | 36 | 35  | 0 | 1                  |
| MV_Schw | A  | 37 | 48  | 0 | 0.950262622850522  |
| MV_Schw | T  | 38 | 39  | 0 | 1                  |
| MV_Schw | C  | 39 | 10  | 0 | 1                  |
| MV_Schw | A  | 40 | 35  | 0 | 1                  |
| MV_Schw | T  | 41 | 23  | 0 | 1                  |
| MV_Schw | C  | 42 | 151 | 0 | 0.166500460032885  |
| MV_Schw | T  | 43 | 172 | 1 | 0.342651296301386  |
| MV_Schw | T  | 44 | 8   | 0 | 1                  |
| MV_Schw | C  | 45 | 109 | 0 | 0.381672248067152  |
| MV_Schw | T  | 46 | 14  | 0 | 1                  |
| MV_Schw | A  | 47 | 23  | 0 | 1                  |
| MV_Schw | G  | 48 | 192 | 0 | 0.0637677617687036 |
| MV_Schw | T  | 49 | 52  | 1 | 1                  |
| MV_Schw | G  | 50 | 52  | 0 | 0.950262622850522  |
| MV_Schw | C  | 51 | 4   | 0 | 1                  |
| MV_Schw | A  | 52 | 21  | 0 | 1                  |
| MV_Schw | C  | 53 | 50  | 0 | 0.950262622850522  |
| MV_Schw | T  | 54 | 120 | 1 | 0.789229943133706  |
| MV_Schw | T  | 55 | 174 | 1 | 0.648224297390367  |
| MV_Schw | A  | 56 | 10  | 0 | 1                  |
| MV_Schw | G  | 57 | 27  | 1 | 1                  |
| MV_Schw | G  | 58 | 14  | 0 | 1                  |
| MV_Schw | A  | 59 | 35  | 0 | 1                  |
| MV_Schw | NA | 60 | 0   | 0 | NA                 |
| MV_Schw | T  | 61 | 138 | 1 | 0.673422966374487  |
| MV_Schw | C  | 62 | 182 | 0 | 0.060993248324147  |
| MV_Schw | A  | 63 | 17  | 1 | 0.983041048229953  |
| MV_Schw | A  | 64 | 68  | 0 | 0.789229943133706  |
| MV_Schw | G  | 65 | 219 | 1 | 0.355607115956135  |
| MV_Schw | A  | 66 | 70  | 0 | 0.789229943133706  |
| MV_Schw | T  | 67 | 52  | 0 | 0.950262622850522  |
| MV_Schw | C  | 68 | 56  | 1 | 1                  |
| MV_Schw | C  | 69 | 436 | 2 | 0.016883608592996  |
| MV_Schw | T  | 70 | 54  | 0 | 0.950262622850522  |

|         |   |     |      |    |                    |
|---------|---|-----|------|----|--------------------|
| MV_Schw | A | 71  | 48   | 0  | 0.950262622850522  |
| MV_Schw | T | 72  | 60   | 0  | 0.957721317456694  |
| MV_Schw | T | 73  | 12   | 0  | 1                  |
| MV_Schw | A | 74  | 182  | 3  | 1                  |
| MV_Schw | T | 75  | 45   | 1  | 1                  |
| MV_Schw | C | 76  | 242  | 4  | 1                  |
| MV_Schw | A | 77  | 174  | 1  | 0.344829637188882  |
| MV_Schw | G | 78  | 227  | 4  | 1                  |
| MV_Schw | G | 79  | 149  | 6  | 0.32892003839023   |
| MV_Schw | G | 80  | 254  | 6  | 1                  |
| MV_Schw | A | 81  | 29   | 3  | 0.0435098404838992 |
| MV_Schw | C | 82  | 202  | 7  | 0.463720798159947  |
| MV_Schw | A | 83  | 12   | 0  | 1                  |
| MV_Schw | A | 84  | 8    | 0  | 1                  |
| MV_Schw | G | 85  | 362  | 11 | 0.638894311640422  |
| MV_Schw | A | 86  | 109  | 3  | 0.950262622850522  |
| MV_Schw | G | 87  | 1382 | 43 | 0.0323121040101114 |
| MV_Schw | C | 88  | 347  | 11 | 0.419231414474137  |
| MV_Schw | A | 89  | 56   | 2  | 0.968890372475178  |
| MV_Schw | G | 90  | 231  | 2  | 0.63332687953074   |
| MV_Schw | G | 91  | 112  | 1  | 1                  |
| MV_Schw | A | 92  | 238  | 2  | 0.527222494111535  |
| MV_Schw | T | 93  | 48   | 1  | 1                  |
| MV_Schw | T | 94  | 122  | 5  | 0.508699586088801  |
| MV_Schw | A | 95  | 33   | 0  | 1                  |
| MV_Schw | G | 96  | 1120 | 27 | 0.825075547319792  |
| MV_Schw | G | 97  | 630  | 7  | 0.219767383050150  |
| MV_Schw | G | 98  | 291  | 1  | 0.0263398139691685 |
| MV_Schw | A | 99  | 6    | 0  | 1                  |
| MV_Schw | T | 100 | 8    | 0  | 1                  |
| MV_Schw | A | 101 | 188  | 5  | 0.950262622850522  |
| MV_Schw | T | 102 | 159  | 3  | 1                  |
| MV_Schw | C | 103 | 1475 | 32 | 1                  |
| MV_Schw | C | 104 | 236  | 4  | 1                  |
| MV_Schw | G | 105 | 242  | 3  | 0.996771597822493  |
| MV_Schw | A | 106 | 136  | 0  | 0.224063006917908  |

|         |   |     |      |   |                      |
|---------|---|-----|------|---|----------------------|
| MV_Schw | G | 107 | 1238 | 5 | 4.76102527336292e-08 |
| MV_Schw | A | 108 | 50   | 0 | 0.950262622850522    |
| MV_Schw | T | 109 | 273  | 3 | 0.596471827524582    |
| MV_Schw | G | 110 | 155  | 1 | 0.88950624150852     |
| MV_Schw | G | 111 | 215  | 2 | 0.737839609011326    |
| MV_Schw | C | 112 | 667  | 4 | 0.00570423707212249  |
| MV_Schw | C | 113 | 1116 | 9 | 0.00229312434114960  |
| MV_Schw | A | 114 | 446  | 1 | 0.000637112445821459 |
| MV_Schw | C | 115 | 293  | 2 | 0.302665612003202    |
| MV_Schw | A | 116 | 62   | 1 | 1                    |
| MV_Schw | C | 117 | 525  | 7 | 0.789229943133706    |
| MV_Schw | T | 118 | 291  | 6 | 1                    |
| MV_Schw | T | 119 | 12   | 1 | 0.88950624150852     |
| MV_Schw | T | 120 | 31   | 0 | 1                    |
| MV_Schw | T | 121 | 281  | 3 | 0.599922780592998    |
| MV_Schw | A | 122 | 225  | 1 | 0.359577424226080    |
| MV_Schw | A | 123 | 171  | 3 | 1                    |
| MV_Schw | G | 124 | 362  | 5 | 0.983041048229953    |
| MV_Schw | G | 125 | 62   | 1 | 1                    |
| MV_Schw | A | 126 | 4    | 0 | 1                    |
| MV_Schw | G | 127 | 165  | 1 | 0.444605338381727    |
| MV_Schw | C | 128 | 99   | 1 | 1                    |
| MV_Schw | T | 129 | 122  | 1 | 0.791667533131283    |
| MV_Schw | T | 130 | 134  | 3 | 1                    |
| MV_Schw | A | 131 | 29   | 0 | 1                    |
| MV_Schw | G | 132 | 196  | 3 | 1                    |
| MV_Schw | C | 133 | 79   | 2 | 1                    |
| MV_Schw | A | 134 | 107  | 2 | 1                    |
| MV_Schw | T | 135 | 19   | 1 | 1                    |
| MV_Schw | T | 136 | 8    | 1 | 0.789229943133706    |
| MV_Schw | G | 137 | 163  | 3 | 1                    |
| MV_Schw | T | 138 | 39   | 1 | 0.9314909603024      |
| MV_Schw | T | 139 | 14   | 0 | 1                    |
| MV_Schw | C | 140 | 97   | 1 | 0.944879389258477    |
| MV_Schw | A | 141 | 37   | 1 | 1                    |
| MV_Schw | A | 142 | 254  | 1 | 0.066634567324381    |

|         |   |     |      |    |                      |
|---------|---|-----|------|----|----------------------|
| MV_Schw | A | 143 | 219  | 0  | 0.0328674635647276   |
| MV_Schw | A | 144 | 167  | 0  | 0.124094801360285    |
| MV_Schw | G | 145 | 514  | 2  | 0.00374831899291936  |
| MV_Schw | A | 146 | 23   | 0  | 1                    |
| MV_Schw | A | 147 | 62   | 0  | 0.789229943133706    |
| MV_Schw | A | 148 | 143  | 1  | 0.542465567021569    |
| MV_Schw | C | 149 | 640  | 5  | 0.0585037343984814   |
| MV_Schw | A | 150 | 31   | 0  | 1                    |
| MV_Schw | A | 151 | 33   | 0  | 1                    |
| MV_Schw | G | 152 | 1432 | 9  | 6.13948733043261e-06 |
| MV_Schw | G | 153 | 182  | 1  | 0.277229700444564    |
| MV_Schw | A | 154 | 19   | 0  | 1                    |
| MV_Schw | C | 155 | 353  | 2  | 0.089478331324259    |
| MV_Schw | A | 156 | 114  | 1  | 0.789229943133706    |
| MV_Schw | A | 157 | 103  | 1  | 1                    |
| MV_Schw | A | 158 | 374  | 3  | 0.335229748200011    |
| MV_Schw | C | 159 | 2025 | 13 | 2.35504949300239e-08 |
| MV_Schw | C | 160 | 227  | 1  | 0.121406033612864    |
| MV_Schw | A | 161 | 23   | 0  | 1                    |
| MV_Schw | C | 162 | 422  | 3  | 0.073283477888091    |
| MV_Schw | C | 163 | 211  | 4  | 1                    |
| MV_Schw | C | 164 | 134  | 0  | 0.222853068696264    |
| MV_Schw | A | 165 | 341  | 1  | 0.047574147684283    |
| MV_Schw | T | 166 | 37   | 0  | 1                    |
| MV_Schw | T | 167 | 35   | 0  | 1                    |
| MV_Schw | A | 168 | 39   | 0  | 1                    |
| MV_Schw | C | 169 | 271  | 1  | 0.187874728258615    |
| MV_Schw | A | 170 | 81   | 0  | 0.641186461810141    |
| MV_Schw | T | 171 | 281  | 1  | 0.141049492085993    |
| MV_Schw | C | 172 | 207  | 0  | 0.0469760201915419   |
| MV_Schw | A | 173 | 48   | 1  | 1                    |
| MV_Schw | G | 174 | 231  | 3  | 1                    |
| MV_Schw | G | 175 | 45   | 2  | 0.65158773158174     |
| MV_Schw | A | 176 | 453  | 5  | 0.528591092326266    |
| MV_Schw | T | 177 | 91   | 1  | 1                    |
| MV_Schw | C | 178 | 56   | 1  | 1                    |

|         |   |     |      |    |                    |
|---------|---|-----|------|----|--------------------|
| MV_Schw | C | 179 | 149  | 1  | 0.88950624150852   |
| MV_Schw | G | 180 | 578  | 12 | 1                  |
| MV_Schw | G | 181 | 663  | 10 | 0.835594358409786  |
| MV_Schw | T | 182 | 446  | 6  | 0.789229943133706  |
| MV_Schw | G | 183 | 99   | 3  | 1                  |
| MV_Schw | G | 184 | 262  | 5  | 1                  |
| MV_Schw | A | 185 | 48   | 1  | 1                  |
| MV_Schw | G | 186 | 329  | 9  | 0.789229943133706  |
| MV_Schw | C | 187 | 157  | 5  | 0.634563222137982  |
| MV_Schw | C | 188 | 78   | 1  | 1                  |
| MV_Schw | A | 189 | 176  | 5  | 1                  |
| MV_Schw | T | 190 | 27   | 0  | 1                  |
| MV_Schw | C | 191 | 368  | 11 | 0.746970975838775  |
| MV_Schw | A | 192 | 62   | 3  | 0.57780206681461   |
| MV_Schw | G | 193 | 963  | 22 | 1                  |
| MV_Schw | A | 194 | 29   | 1  | 1                  |
| MV_Schw | G | 195 | 601  | 22 | 0.0330486922238644 |
| MV_Schw | G | 196 | 163  | 8  | 0.0975104748468945 |
| MV_Schw | A | 197 | 25   | 1  | 1                  |
| MV_Schw | A | 198 | 178  | 5  | 1                  |
| MV_Schw | T | 199 | 58   | 2  | 0.98139756833885   |
| MV_Schw | C | 200 | 419  | 10 | 1                  |
| MV_Schw | A | 201 | 138  | 3  | 1                  |
| MV_Schw | A | 202 | 107  | 3  | 1                  |
| MV_Schw | A | 203 | 401  | 7  | 1                  |
| MV_Schw | C | 204 | 1297 | 41 | 0.030930043514711  |
| MV_Schw | A | 205 | 10   | 0  | 1                  |
| MV_Schw | C | 206 | 159  | 7  | 0.152879709792478  |
| MV_Schw | A | 207 | 27   | 1  | 1                  |
| MV_Schw | T | 208 | 62   | 1  | 1                  |
| MV_Schw | T | 209 | 33   | 0  | 1                  |
| MV_Schw | A | 210 | 19   | 1  | 0.57780206681461   |
| MV_Schw | T | 211 | 89   | 2  | 1                  |
| MV_Schw | T | 212 | 17   | 2  | 0.190596323698557  |
| MV_Schw | A | 213 | 151  | 3  | 1                  |
| MV_Schw | T | 214 | 58   | 1  | 1                  |

|         |   |     |      |    |                    |
|---------|---|-----|------|----|--------------------|
| MV_Schw | A | 215 | 16   | 1  | 0.483965165529824  |
| MV_Schw | G | 216 | 190  | 3  | 1                  |
| MV_Schw | T | 217 | 78   | 1  | 1                  |
| MV_Schw | A | 218 | 17   | 1  | 0.983041048229953  |
| MV_Schw | C | 219 | 190  | 4  | 1                  |
| MV_Schw | C | 220 | 64   | 0  | 0.789229943133706  |
| MV_Schw | A | 221 | 545  | 7  | 0.528869794103543  |
| MV_Schw | A | 222 | 99   | 3  | 1                  |
| MV_Schw | T | 223 | 120  | 1  | 0.789229943133706  |
| MV_Schw | C | 224 | 149  | 3  | 1                  |
| MV_Schw | C | 225 | 132  | 1  | 0.983041048229953  |
| MV_Schw | C | 226 | 250  | 5  | 1                  |
| MV_Schw | T | 227 | 207  | 2  | 0.734151152837751  |
| MV_Schw | G | 228 | 1124 | 11 | 0.0202752911466465 |
| MV_Schw | G | 229 | 316  | 4  | 0.865570305903631  |
| MV_Schw | A | 230 | 171  | 5  | 0.789229943133706  |
| MV_Schw | G | 231 | 149  | 3  | 1                  |
| MV_Schw | A | 232 | 19   | 0  | 1                  |
| MV_Schw | T | 233 | 23   | 0  | 1                  |
| MV_Schw | T | 234 | 29   | 0  | 1                  |
| MV_Schw | C | 235 | 163  | 3  | 1                  |
| MV_Schw | C | 236 | 655  | 8  | 0.398157304659458  |
| MV_Schw | T | 237 | 35   | 0  | 1                  |
| MV_Schw | C | 238 | 266  | 2  | 0.444605338381727  |
| MV_Schw | A | 239 | 95   | 1  | 1                  |
| MV_Schw | A | 240 | 62   | 1  | 1                  |
| MV_Schw | T | 241 | 37   | 0  | 1                  |
| MV_Schw | T | 242 | 109  | 1  | 0.947544583923452  |
| MV_Schw | A | 243 | 10   | 0  | 1                  |
| MV_Schw | C | 244 | 74   | 1  | 1                  |
| MV_Schw | C | 245 | 64   | 0  | 0.789229943133706  |
| MV_Schw | A | 246 | 200  | 3  | 1                  |
| MV_Schw | C | 247 | 128  | 1  | 0.658415249679101  |
| MV_Schw | T | 248 | 39   | 0  | 1                  |
| MV_Schw | C | 249 | 16   | 0  | 1                  |
| MV_Schw | G | 250 | 62   | 0  | 0.789229943133706  |



|         |   |     |     |   |                   |   |
|---------|---|-----|-----|---|-------------------|---|
| MV_Schw | A | 251 | 29  | 1 |                   | 1 |
| MV_Schw | T | 252 | 60  | 2 | 0.983041048229953 |   |
| MV_Schw | C | 253 | 48  | 0 | 0.950262622850522 |   |
| MV_Schw | C | 254 | 64  | 0 | 0.789229943133706 |   |
| MV_Schw | A | 255 | 10  | 0 |                   | 1 |
| MV_Schw | G | 256 | 47  | 1 |                   | 1 |
| MV_Schw | A | 257 | 165 | 1 | 0.786994490087255 |   |
| MV_Schw | C | 258 | 23  | 0 |                   | 1 |
| MV_Schw | T | 259 | 8   | 0 |                   | 1 |
| MV_Schw | T | 260 | 37  | 0 |                   | 1 |
| MV_Schw | C | 261 | 14  | 0 |                   | 1 |
| MV_Schw | T | 262 | 21  | 0 |                   | 1 |
| MV_Schw | G | 263 | 62  | 2 | 0.991517221373143 |   |
| MV_Schw | G | 264 | 70  | 1 |                   | 1 |
| MV_Schw | A | 265 | 12  | 1 | 0.88950624150852  |   |
| MV_Schw | C | 266 | 8   | 0 |                   | 1 |
| MV_Schw | C | 267 | 70  | 0 | 0.789229943133706 |   |
| MV_Schw | G | 268 | 54  | 1 |                   | 1 |
| MV_Schw | G | 269 | 64  | 1 |                   | 1 |
| MV_Schw | T | 270 | 2   | 0 |                   | 1 |
| MV_Schw | T | 271 | 29  | 1 |                   | 1 |
| MV_Schw | G | 272 | 45  | 1 |                   | 1 |
| MV_Schw | G | 273 | 58  | 1 |                   | 1 |
| MV_Schw | T | 274 | 16  | 1 | 0.950262622850522 |   |
| MV_Schw | G | 275 | 56  | 0 | 0.950262622850522 |   |
| MV_Schw | A | 276 | 2   | 0 |                   | 1 |
| MV_Schw | G | 277 | 161 | 5 | 0.934340244643933 |   |
| MV_Schw | G | 278 | 289 | 4 |                   | 1 |
| MV_Schw | T | 279 | 6   | 0 |                   | 1 |
| MV_Schw | T | 280 | 21  | 0 |                   | 1 |
| MV_Schw | A | 281 | 21  | 1 |                   | 1 |
| MV_Schw | A | 282 | 91  | 1 |                   | 1 |
| MV_Schw | T | 283 | 112 | 1 | 0.789229943133706 |   |
| MV_Schw | T | 284 | 211 | 1 | 0.445919862395878 |   |
| MV_Schw | G | 285 | 128 | 1 |                   | 1 |
| MV_Schw | G | 286 | 64  | 1 |                   | 1 |

|         |   |     |     |    |                      |   |
|---------|---|-----|-----|----|----------------------|---|
| MV_Schw | A | 287 | 17  | 0  |                      | 1 |
| MV_Schw | A | 288 | 47  | 0  |                      | 1 |
| MV_Schw | A | 289 | 31  | 0  |                      | 1 |
| MV_Schw | C | 290 | 99  | 1  | 0.944879389258477    |   |
| MV_Schw | C | 291 | 54  | 1  |                      | 1 |
| MV_Schw | C | 292 | 186 | 4  |                      | 1 |
| MV_Schw | G | 293 | 417 | 5  | 0.787941847439366    |   |
| MV_Schw | G | 294 | 120 | 2  |                      | 1 |
| MV_Schw | A | 295 | 95  | 5  | 0.244569722692791    |   |
| MV_Schw | T | 296 | 47  | 1  |                      | 1 |
| MV_Schw | G | 297 | 50  | 1  |                      | 1 |
| MV_Schw | T | 298 | 14  | 1  | 0.944879389258477    |   |
| MV_Schw | G | 299 | 39  | 1  | 0.9314909603024      |   |
| MV_Schw | A | 300 | 109 | 2  |                      | 1 |
| MV_Schw | G | 301 | 934 | 12 | 0.263036539360682    |   |
| MV_Schw | C | 302 | 316 | 2  | 0.191903929734333    |   |
| MV_Schw | G | 303 | 359 | 11 | 0.634563222137982    |   |
| MV_Schw | G | 304 | 109 | 1  |                      | 1 |
| MV_Schw | G | 305 | 421 | 4  | 0.313226962785756    |   |
| MV_Schw | C | 306 | 273 | 1  | 0.139259883257776    |   |
| MV_Schw | C | 307 | 95  | 3  | 0.764161655608143    |   |
| MV_Schw | C | 308 | 91  | 0  | 0.497615650989996    |   |
| MV_Schw | A | 309 | 79  | 1  |                      | 1 |
| MV_Schw | A | 310 | 66  | 0  | 0.789229943133706    |   |
| MV_Schw | A | 311 | 60  | 1  |                      | 1 |
| MV_Schw | C | 312 | 514 | 6  | 0.429218543236662    |   |
| MV_Schw | T | 313 | 50  | 1  |                      | 1 |
| MV_Schw | A | 314 | 91  | 1  |                      | 1 |
| MV_Schw | A | 315 | 17  | 0  |                      | 1 |
| MV_Schw | C | 316 | 601 | 2  | 0.000380700426279051 |   |
| MV_Schw | A | 317 | 79  | 0  | 0.639207655977387    |   |
| MV_Schw | G | 318 | 103 | 1  | 0.944879389258477    |   |
| MV_Schw | G | 319 | 138 | 0  | 0.22714633168584     |   |
| MV_Schw | G | 320 | 118 | 2  |                      | 1 |
| MV_Schw | G | 321 | 190 | 0  | 0.0626240647804826   |   |
| MV_Schw | C | 322 | 110 | 1  | 0.789229943133706    |   |

|         |   |     |     |    |                      |
|---------|---|-----|-----|----|----------------------|
| MV_Schw | A | 323 | 87  | 3  | 0.935220820395243    |
| MV_Schw | C | 324 | 145 | 0  | 0.161503851613234    |
| MV_Schw | T | 325 | 31  | 0  | 1                    |
| MV_Schw | A | 326 | 47  | 0  | 1                    |
| MV_Schw | A | 327 | 6   | 1  | 0.704667204683568    |
| MV_Schw | T | 328 | 87  | 1  | 1                    |
| MV_Schw | A | 329 | 25  | 0  | 1                    |
| MV_Schw | G | 330 | 109 | 0  | 0.381672248067152    |
| MV_Schw | G | 331 | 64  | 1  | 1                    |
| MV_Schw | T | 332 | 12  | 0  | 1                    |
| MV_Schw | A | 333 | 43  | 0  | 1                    |
| MV_Schw | T | 334 | 33  | 1  | 1                    |
| MV_Schw | A | 335 | 110 | 1  | 0.789229943133706    |
| MV_Schw | T | 336 | 4   | 0  | 1                    |
| MV_Schw | T | 337 | 10  | 0  | 1                    |
| MV_Schw | A | 338 | 72  | 1  | 1                    |
| MV_Schw | T | 339 | 31  | 1  | 1                    |
| MV_Schw | C | 340 | 136 | 2  | 1                    |
| MV_Schw | C | 341 | 533 | 5  | 0.245202640825390    |
| MV_Schw | T | 342 | 16  | 0  | 1                    |
| MV_Schw | T | 343 | 52  | 0  | 0.950262622850522    |
| MV_Schw | A | 344 | 103 | 0  | 0.37877131423274     |
| MV_Schw | T | 345 | 29  | 1  | 1                    |
| MV_Schw | T | 346 | 52  | 1  | 1                    |
| MV_Schw | T | 347 | 132 | 3  | 1                    |
| MV_Schw | G | 348 | 304 | 3  | 0.645428736569362    |
| MV_Schw | T | 349 | 27  | 1  | 1                    |
| MV_Schw | G | 350 | 998 | 12 | 0.142984378940317    |
| MV_Schw | G | 351 | 134 | 1  | 0.66330042087892     |
| MV_Schw | A | 352 | 52  | 1  | 1                    |
| MV_Schw | G | 353 | 76  | 0  | 0.638894311640422    |
| MV_Schw | T | 354 | 10  | 0  | 1                    |
| MV_Schw | C | 355 | 483 | 5  | 0.390345857720356    |
| MV_Schw | T | 356 | 231 | 3  | 0.88950624150852     |
| MV_Schw | C | 357 | 194 | 1  | 0.542465567021569    |
| MV_Schw | C | 358 | 973 | 3  | 2.34718291711250e-07 |

|         |   |     |      |    |                    |   |
|---------|---|-----|------|----|--------------------|---|
| MV_Schw | A | 359 | 213  | 3  |                    | 1 |
| MV_Schw | G | 360 | 864  | 7  | 0.0133971878007475 |   |
| MV_Schw | G | 361 | 347  | 3  | 0.237889985125885  |   |
| MV_Schw | T | 362 | 16   | 1  | 0.950262622850522  |   |
| MV_Schw | C | 363 | 35   | 1  |                    | 1 |
| MV_Schw | A | 364 | 109  | 0  | 0.381672248067152  |   |
| MV_Schw | A | 365 | 287  | 1  | 0.145503197757787  |   |
| MV_Schw | T | 366 | 169  | 1  | 0.341186273229673  |   |
| MV_Schw | T | 367 | 114  | 1  | 0.789229943133706  |   |
| MV_Schw | G | 368 | 95   | 1  |                    | 1 |
| MV_Schw | A | 369 | 132  | 1  | 0.659520109379356  |   |
| MV_Schw | T | 370 | 81   | 0  | 0.641186461810141  |   |
| MV_Schw | T | 371 | 316  | 3  | 0.34589959211708   |   |
| MV_Schw | C | 372 | 411  | 3  | 0.1894828911111102 |   |
| MV_Schw | A | 373 | 128  | 1  | 0.658415249679101  |   |
| MV_Schw | G | 374 | 143  | 1  | 0.542465567021569  |   |
| MV_Schw | A | 375 | 178  | 1  | 0.351232192365447  |   |
| MV_Schw | G | 376 | 376  | 5  | 0.739167860388836  |   |
| MV_Schw | G | 377 | 17   | 0  |                    | 1 |
| MV_Schw | A | 378 | 103  | 1  |                    | 1 |
| MV_Schw | T | 379 | 62   | 1  |                    | 1 |
| MV_Schw | C | 380 | 364  | 6  |                    | 1 |
| MV_Schw | A | 381 | 43   | 0  |                    | 1 |
| MV_Schw | C | 382 | 696  | 15 |                    | 1 |
| MV_Schw | C | 383 | 2145 | 33 | 0.293598695871605  |   |
| MV_Schw | G | 384 | 853  | 15 |                    | 1 |
| MV_Schw | A | 385 | 279  | 6  |                    | 1 |
| MV_Schw | T | 386 | 295  | 6  |                    | 1 |
| MV_Schw | G | 387 | 103  | 2  |                    | 1 |
| MV_Schw | A | 388 | 8    | 0  |                    | 1 |
| MV_Schw | C | 389 | 320  | 7  |                    | 1 |
| MV_Schw | C | 390 | 355  | 3  | 0.397437008479015  |   |
| MV_Schw | C | 391 | 702  | 14 |                    | 1 |
| MV_Schw | T | 392 | 165  | 1  | 0.444605338381727  |   |
| MV_Schw | G | 393 | 118  | 3  |                    | 1 |
| MV_Schw | A | 394 | 27   | 0  |                    | 1 |

|         |    |     |     |   |                     |
|---------|----|-----|-----|---|---------------------|
| MV_Schw | C  | 395 | 446 | 3 | 0.121677050932237   |
| MV_Schw | G  | 396 | 331 | 4 | 0.789229943133706   |
| MV_Schw | T  | 397 | 64  | 1 | 1                   |
| MV_Schw | T  | 398 | 41  | 0 | 1                   |
| MV_Schw | A  | 399 | 19  | 0 | 1                   |
| MV_Schw | G  | 400 | 262 | 2 | 0.44055837109039    |
| MV_Schw | C  | 401 | 192 | 1 | 0.542247232322076   |
| MV_Schw | A  | 402 | 76  | 1 | 1                   |
| MV_Schw | T  | 403 | 72  | 1 | 1                   |
| MV_Schw | A  | 404 | 33  | 1 | 1                   |
| MV_Schw | A  | 405 | 68  | 0 | 0.789229943133706   |
| MV_Schw | G  | 406 | 291 | 4 | 0.950262622850522   |
| MV_Schw | G  | 407 | 114 | 1 | 0.789229943133706   |
| MV_Schw | C  | 408 | 124 | 1 | 1                   |
| MV_Schw | T  | 409 | 17  | 1 | 0.528591092326266   |
| MV_Schw | G  | 410 | 287 | 4 | 1                   |
| MV_Schw | T  | 411 | 29  | 0 | 1                   |
| MV_Schw | T  | 412 | 81  | 1 | 1                   |
| MV_Schw | A  | 413 | 47  | 0 | 1                   |
| MV_Schw | G  | 414 | 54  | 1 | 1                   |
| MV_Schw | A  | 415 | 35  | 0 | 1                   |
| MV_Schw | G  | 416 | 126 | 1 | 1                   |
| MV_Schw | G  | 417 | 300 | 2 | 0.239446226094413   |
| MV_Schw | NA | 418 | 0   | 0 | NA                  |
| MV_Schw | T  | 419 | 23  | 0 | 1                   |
| MV_Schw | G  | 420 | 444 | 5 | 0.426789350155389   |
| MV_Schw | T  | 421 | 326 | 2 | 0.149071756066224   |
| MV_Schw | C  | 422 | 380 | 3 | 0.286462760557962   |
| MV_Schw | C  | 423 | 202 | 0 | 0.0445795746199782  |
| MV_Schw | A  | 424 | 120 | 1 | 0.789229943133706   |
| MV_Schw | G  | 425 | 207 | 1 | 0.444112248634472   |
| MV_Schw | A  | 426 | 78  | 0 | 0.638894311640422   |
| MV_Schw | G  | 427 | 717 | 4 | 0.00177078532209268 |
| MV_Schw | T  | 428 | 211 | 2 | 0.73453580589799    |
| MV_Schw | G  | 429 | 140 | 3 | 1                   |
| MV_Schw | A  | 430 | 85  | 0 | 0.648224297390367   |

|         |   |     |      |    |                     |
|---------|---|-----|------|----|---------------------|
| MV_Schw | C | 431 | 302  | 2  | 0.240688690197626   |
| MV_Schw | C | 432 | 238  | 0  | 0.0156995341126586  |
| MV_Schw | A | 433 | 64   | 0  | 0.789229943133706   |
| MV_Schw | G | 434 | 554  | 6  | 0.310014212102732   |
| MV_Schw | T | 435 | 362  | 3  | 0.405069797834504   |
| MV_Schw | C | 436 | 508  | 7  | 0.822598489333375   |
| MV_Schw | A | 437 | 136  | 1  | 0.667619064364632   |
| MV_Schw | C | 438 | 174  | 4  | 1                   |
| MV_Schw | A | 439 | 39   | 0  | 1                   |
| MV_Schw | A | 440 | 141  | 3  | 1                   |
| MV_Schw | T | 441 | 269  | 5  | 1                   |
| MV_Schw | C | 442 | 159  | 2  | 1                   |
| MV_Schw | T | 443 | 21   | 0  | 1                   |
| MV_Schw | G | 444 | 194  | 1  | 0.542465567021569   |
| MV_Schw | G | 445 | 184  | 2  | 0.947544583923452   |
| MV_Schw | C | 446 | 603  | 3  | 0.00177901624824218 |
| MV_Schw | C | 447 | 155  | 0  | 0.118807954027477   |
| MV_Schw | T | 448 | 39   | 1  | 1                   |
| MV_Schw | T | 449 | 8    | 1  | 0.789229943133706   |
| MV_Schw | A | 450 | 8    | 1  | 0.258627633593378   |
| MV_Schw | C | 451 | 41   | 1  | 1                   |
| MV_Schw | C | 452 | 124  | 3  | 1                   |
| MV_Schw | T | 453 | 116  | 1  | 1                   |
| MV_Schw | T | 454 | 31   | 1  | 0.791667533131283   |
| MV_Schw | C | 455 | 99   | 1  | 1                   |
| MV_Schw | G | 456 | 351  | 5  | 1                   |
| MV_Schw | C | 457 | 380  | 9  | 1                   |
| MV_Schw | A | 458 | 320  | 3  | 0.346363438943306   |
| MV_Schw | T | 459 | 76   | 0  | 0.638894311640422   |
| MV_Schw | C | 460 | 87   | 1  | 1                   |
| MV_Schw | A | 461 | 81   | 2  | 1                   |
| MV_Schw | A | 462 | 120  | 4  | 0.813457243243208   |
| MV_Schw | G | 463 | 1114 | 19 | 0.88950624150852    |
| MV_Schw | A | 464 | 60   | 1  | 1                   |
| MV_Schw | G | 465 | 93   | 1  | 1                   |
| MV_Schw | G | 466 | 105  | 1  | 0.944944073306986   |

|         |   |     |      |    |                      |
|---------|---|-----|------|----|----------------------|
| MV_Schw | T | 467 | 48   | 0  | 0.950262622850522    |
| MV_Schw | A | 468 | 62   | 0  | 0.789229943133706    |
| MV_Schw | C | 469 | 599  | 11 | 1                    |
| MV_Schw | C | 470 | 234  | 3  | 0.88950624150852     |
| MV_Schw | A | 471 | 141  | 1  | 0.542247232322076    |
| MV_Schw | A | 472 | 58   | 1  | 1                    |
| MV_Schw | C | 473 | 430  | 7  | 1                    |
| MV_Schw | A | 474 | 167  | 3  | 1                    |
| MV_Schw | T | 475 | 213  | 2  | 0.73548636006501     |
| MV_Schw | G | 476 | 647  | 9  | 0.699021910371034    |
| MV_Schw | G | 477 | 151  | 1  | 0.88950624150852     |
| MV_Schw | A | 478 | 122  | 3  | 1                    |
| MV_Schw | G | 479 | 345  | 7  | 1                    |
| MV_Schw | G | 480 | 618  | 13 | 1                    |
| MV_Schw | A | 481 | 91   | 1  | 1                    |
| MV_Schw | T | 482 | 122  | 2  | 1                    |
| MV_Schw | G | 483 | 136  | 1  | 0.667619064364632    |
| MV_Schw | A | 484 | 469  | 5  | 0.461160725749802    |
| MV_Schw | G | 485 | 1091 | 23 | 1                    |
| MV_Schw | G | 486 | 1452 | 27 | 1                    |
| MV_Schw | C | 487 | 3702 | 76 | 1                    |
| MV_Schw | G | 488 | 364  | 7  | 1                    |
| MV_Schw | G | 489 | 1155 | 23 | 1                    |
| MV_Schw | A | 490 | 484  | 11 | 1                    |
| MV_Schw | C | 491 | 1281 | 16 | 0.105321860709821    |
| MV_Schw | C | 492 | 411  | 3  | 0.189482891111102    |
| MV_Schw | A | 493 | 182  | 3  | 1                    |
| MV_Schw | A | 494 | 326  | 5  | 1                    |
| MV_Schw | T | 495 | 110  | 1  | 1                    |
| MV_Schw | A | 496 | 295  | 5  | 1                    |
| MV_Schw | C | 497 | 471  | 5  | 0.461766975079516    |
| MV_Schw | T | 498 | 481  | 9  | 1                    |
| MV_Schw | T | 499 | 236  | 3  | 1                    |
| MV_Schw | T | 500 | 558  | 5  | 0.166500460032885    |
| MV_Schw | T | 501 | 56   | 1  | 1                    |
| MV_Schw | C | 502 | 1223 | 9  | 0.000125049273878398 |

|         |   |     |     |   |                      |   |
|---------|---|-----|-----|---|----------------------|---|
| MV_Schw | A | 503 | 48  | 1 |                      | 1 |
| MV_Schw | C | 504 | 399 | 3 | 0.121990068397456    |   |
| MV_Schw | A | 505 | 41  | 0 |                      | 1 |
| MV_Schw | T | 506 | 758 | 4 | 0.000725010829345104 |   |
| MV_Schw | G | 507 | 54  | 1 |                      | 1 |
| MV_Schw | A | 508 | 12  | 0 |                      | 1 |
| MV_Schw | T | 509 | 122 | 1 | 0.791667533131283    |   |
| MV_Schw | G | 510 | 190 | 1 | 0.542247232322076    |   |
| MV_Schw | A | 511 | 79  | 1 |                      | 1 |
| MV_Schw | T | 512 | 70  | 1 |                      | 1 |
| MV_Schw | C | 513 | 184 | 1 | 0.277229700444564    |   |
| MV_Schw | C | 514 | 242 | 1 | 0.299148652241935    |   |
| MV_Schw | A | 515 | 101 | 2 |                      | 1 |
| MV_Schw | A | 516 | 74  | 1 |                      | 1 |
| MV_Schw | T | 517 | 134 | 1 | 0.983041048229953    |   |
| MV_Schw | T | 518 | 27  | 0 |                      | 1 |
| MV_Schw | A | 519 | 19  | 0 |                      | 1 |
| MV_Schw | G | 520 | 169 | 3 |                      | 1 |
| MV_Schw | T | 521 | 109 | 0 | 0.381672248067152    |   |
| MV_Schw | A | 522 | 37  | 2 | 0.528591092326266    |   |
| MV_Schw | G | 523 | 118 | 0 | 0.296802961873227    |   |
| MV_Schw | T | 524 | 25  | 1 |                      | 1 |
| MV_Schw | G | 525 | 750 | 5 | 0.0035996130604979   |   |
| MV_Schw | A | 526 | 64  | 0 | 0.789229943133706    |   |
| MV_Schw | T | 527 | 62  | 1 |                      | 1 |
| MV_Schw | C | 528 | 70  | 0 | 0.789229943133706    |   |
| MV_Schw | A | 529 | 50  | 0 | 0.950262622850522    |   |
| MV_Schw | A | 530 | 308 | 2 | 0.245534395819558    |   |
| MV_Schw | T | 531 | 266 | 2 | 0.444605338381727    |   |
| MV_Schw | C | 532 | 688 | 2 | 5.09424987726302e-05 |   |
| MV_Schw | C | 533 | 254 | 1 | 0.066634567324381    |   |
| MV_Schw | A | 534 | 37  | 1 | 0.88950624150852     |   |
| MV_Schw | G | 535 | 231 | 5 |                      | 1 |
| MV_Schw | G | 536 | 696 | 9 | 0.504626906950996    |   |
| MV_Schw | T | 537 | 62  | 1 |                      | 1 |
| MV_Schw | T | 538 | 29  | 0 |                      | 1 |



|         |   |     |      |    |                      |
|---------|---|-----|------|----|----------------------|
| MV_Schw | C | 539 | 99   | 0  | 0.509396577320122    |
| MV_Schw | G | 540 | 535  | 3  | 0.0279724561640337   |
| MV_Schw | G | 541 | 337  | 6  | 1                    |
| MV_Schw | A | 542 | 217  | 3  | 0.957721317456694    |
| MV_Schw | T | 543 | 291  | 4  | 0.950262622850522    |
| MV_Schw | G | 544 | 48   | 1  | 1                    |
| MV_Schw | G | 545 | 91   | 0  | 0.497615650989996    |
| MV_Schw | T | 546 | 155  | 1  | 0.436311974989592    |
| MV_Schw | T | 547 | 331  | 2  | 0.150659907408196    |
| MV_Schw | C | 548 | 1043 | 13 | 0.157735817894486    |
| MV_Schw | G | 549 | 382  | 1  | 0.00375124519292723  |
| MV_Schw | G | 550 | 1845 | 15 | 1.73948402810107e-05 |
| MV_Schw | G | 551 | 872  | 8  | 0.025854429296827    |
| MV_Schw | A | 552 | 297  | 1  | 0.0265628244936291   |
| MV_Schw | A | 553 | 130  | 1  | 0.983041048229953    |
| MV_Schw | C | 554 | 271  | 5  | 1                    |
| MV_Schw | A | 555 | 89   | 1  | 1                    |
| MV_Schw | A | 556 | 421  | 3  | 0.0729960130880603   |
| MV_Schw | G | 557 | 1754 | 34 | 1                    |
| MV_Schw | G | 558 | 578  | 6  | 0.230921379149447    |
| MV_Schw | A | 559 | 167  | 0  | 0.124094801360285    |
| MV_Schw | A | 560 | 64   | 1  | 1                    |
| MV_Schw | A | 561 | 64   | 1  | 1                    |
| MV_Schw | T | 562 | 47   | 0  | 1                    |
| MV_Schw | C | 563 | 705  | 12 | 1                    |
| MV_Schw | T | 564 | 29   | 0  | 1                    |
| MV_Schw | C | 565 | 610  | 7  | 0.258627633593378    |
| MV_Schw | A | 566 | 76   | 0  | 0.638894311640422    |
| MV_Schw | G | 567 | 488  | 1  | 0.00145679532500956  |
| MV_Schw | A | 568 | 19   | 0  | 1                    |
| MV_Schw | T | 569 | 45   | 0  | 1                    |
| MV_Schw | A | 570 | 17   | 0  | 1                    |
| MV_Schw | T | 571 | 54   | 1  | 1                    |
| MV_Schw | T | 572 | 83   | 1  | 1                    |
| MV_Schw | G | 573 | 614  | 13 | 1                    |
| MV_Schw | A | 574 | 95   | 1  | 1                    |

|         |   |     |      |    |                     |
|---------|---|-----|------|----|---------------------|
| MV_Schw | A | 575 | 66   | 0  | 0.789229943133706   |
| MV_Schw | G | 576 | 907  | 25 | 0.403516190901706   |
| MV_Schw | T | 577 | 78   | 1  | 1                   |
| MV_Schw | G | 578 | 537  | 7  | 0.528591092326266   |
| MV_Schw | C | 579 | 370  | 7  | 1                   |
| MV_Schw | A | 580 | 591  | 12 | 1                   |
| MV_Schw | A | 581 | 911  | 31 | 0.03105128126947    |
| MV_Schw | G | 582 | 523  | 15 | 0.630276704899262   |
| MV_Schw | A | 583 | 91   | 3  | 1                   |
| MV_Schw | C | 584 | 318  | 5  | 1                   |
| MV_Schw | C | 585 | 33   | 1  | 0.822598489333375   |
| MV_Schw | C | 586 | 529  | 11 | 1                   |
| MV_Schw | T | 587 | 95   | 1  | 1                   |
| MV_Schw | G | 588 | 1190 | 17 | 0.421453827712292   |
| MV_Schw | A | 589 | 289  | 4  | 1                   |
| MV_Schw | G | 590 | 424  | 11 | 0.950262622850522   |
| MV_Schw | G | 591 | 97   | 3  | 0.78354985902497    |
| MV_Schw | G | 592 | 58   | 3  | 0.528591092326266   |
| MV_Schw | A | 593 | 229  | 2  | 0.632968068765344   |
| MV_Schw | T | 594 | 153  | 0  | 0.169696698380260   |
| MV_Schw | T | 595 | 35   | 1  | 0.863499923807603   |
| MV_Schw | C | 596 | 219  | 2  | 0.7433964722815     |
| MV_Schw | A | 597 | 72   | 0  | 0.791667533131283   |
| MV_Schw | A | 598 | 41   | 1  | 1                   |
| MV_Schw | C | 599 | 1128 | 17 | 0.497615650989996   |
| MV_Schw | A | 600 | 97   | 1  | 1                   |
| MV_Schw | T | 601 | 47   | 2  | 0.678058690427187   |
| MV_Schw | G | 602 | 60   | 1  | 1                   |
| MV_Schw | A | 603 | 190  | 1  | 0.542247232322076   |
| MV_Schw | T | 604 | 351  | 3  | 0.239137755983385   |
| MV_Schw | T | 605 | 89   | 1  | 1                   |
| MV_Schw | C | 606 | 517  | 4  | 0.0746595992424665  |
| MV_Schw | T | 607 | 93   | 1  | 1                   |
| MV_Schw | G | 608 | 783  | 5  | 0.00489367250286117 |
| MV_Schw | G | 609 | 1564 | 17 | 0.00522870855136886 |
| MV_Schw | G | 610 | 610  | 9  | 0.757163035248454   |

|         |   |     |     |   |                    |   |
|---------|---|-----|-----|---|--------------------|---|
| MV_Schw | T | 611 | 54  | 1 |                    | 1 |
| MV_Schw | A | 612 | 19  | 0 |                    | 1 |
| MV_Schw | C | 613 | 58  | 1 |                    | 1 |
| MV_Schw | C | 614 | 128 | 1 | 0.658415249679101  |   |
| MV_Schw | A | 615 | 72  | 1 |                    | 1 |
| MV_Schw | T | 616 | 417 | 5 | 0.787941847439366  |   |
| MV_Schw | C | 617 | 752 | 7 | 0.0781524919100269 |   |
| MV_Schw | C | 618 | 469 | 8 |                    | 1 |
| MV_Schw | T | 619 | 25  | 0 |                    | 1 |
| MV_Schw | A | 620 | 54  | 1 |                    | 1 |
| MV_Schw | G | 621 | 436 | 4 | 0.276152046214389  |   |
| MV_Schw | C | 622 | 264 | 3 | 0.940669409851862  |   |
| MV_Schw | C | 623 | 174 | 1 | 0.344829637188882  |   |
| MV_Schw | C | 624 | 174 | 2 |                    | 1 |
| MV_Schw | A | 625 | 52  | 0 | 0.950262622850522  |   |
| MV_Schw | A | 626 | 45  | 1 |                    | 1 |
| MV_Schw | A | 627 | 33  | 1 |                    | 1 |
| MV_Schw | T | 628 | 128 | 2 |                    | 1 |
| MV_Schw | T | 629 | 21  | 0 |                    | 1 |
| MV_Schw | T | 630 | 12  | 1 | 0.88950624150852   |   |
| MV_Schw | G | 631 | 231 | 2 | 0.63332687953074   |   |
| MV_Schw | G | 632 | 78  | 1 |                    | 1 |
| MV_Schw | G | 633 | 74  | 0 | 0.795198078226602  |   |
| MV_Schw | T | 634 | 6   | 0 |                    | 1 |
| MV_Schw | C | 635 | 58  | 1 |                    | 1 |
| MV_Schw | T | 636 | 14  | 1 | 0.944879389258477  |   |
| MV_Schw | T | 637 | 83  | 1 |                    | 1 |
| MV_Schw | G | 638 | 128 | 1 |                    | 1 |
| MV_Schw | C | 639 | 767 | 7 | 0.0351061035438848 |   |
| MV_Schw | T | 640 | 39  | 1 | 0.9314909603024    |   |
| MV_Schw | C | 641 | 504 | 7 | 0.660835909523436  |   |
| MV_Schw | G | 642 | 349 | 5 |                    | 1 |
| MV_Schw | C | 643 | 295 | 3 | 0.503192867159235  |   |
| MV_Schw | A | 644 | 109 | 0 | 0.381672248067152  |   |
| MV_Schw | A | 645 | 188 | 2 | 0.950262622850522  |   |
| MV_Schw | A | 646 | 116 | 3 |                    | 1 |

|         |   |     |      |    |                     |   |
|---------|---|-----|------|----|---------------------|---|
| MV_Schw | G | 647 | 289  | 3  | 0.746970975838775   |   |
| MV_Schw | G | 648 | 264  | 3  | 0.684463566136253   |   |
| MV_Schw | C | 649 | 256  | 5  |                     | 1 |
| MV_Schw | G | 650 | 188  | 4  |                     | 1 |
| MV_Schw | G | 651 | 318  | 7  |                     | 1 |
| MV_Schw | T | 652 | 171  | 2  |                     | 1 |
| MV_Schw | T | 653 | 174  | 4  |                     | 1 |
| MV_Schw | A | 654 | 56   | 0  | 0.950262622850522   |   |
| MV_Schw | C | 655 | 857  | 15 |                     | 1 |
| MV_Schw | G | 656 | 134  | 3  |                     | 1 |
| MV_Schw | G | 657 | 459  | 9  |                     | 1 |
| MV_Schw | C | 658 | 1041 | 26 | 0.78470776546672    |   |
| MV_Schw | C | 659 | 409  | 7  |                     | 1 |
| MV_Schw | C | 660 | 260  | 5  |                     | 1 |
| MV_Schw | C | 661 | 713  | 24 | 0.0802641948298692  |   |
| MV_Schw | A | 662 | 287  | 5  |                     | 1 |
| MV_Schw | G | 663 | 523  | 7  | 0.603663608935981   |   |
| MV_Schw | A | 664 | 45   | 2  | 0.65158773158174    |   |
| MV_Schw | C | 665 | 1252 | 40 | 0.0263539968766402  |   |
| MV_Schw | A | 666 | 176  | 9  | 0.0263686814356238  |   |
| MV_Schw | C | 667 | 1372 | 46 | 0.00428907439371087 |   |
| MV_Schw | G | 668 | 417  | 8  |                     | 1 |
| MV_Schw | G | 669 | 512  | 17 | 0.254862135918371   |   |
| MV_Schw | C | 670 | 862  | 21 | 0.880143938732913   |   |
| MV_Schw | A | 671 | 184  | 5  | 0.950262622850522   |   |
| MV_Schw | G | 672 | 1795 | 60 | 0.00062838411561456 |   |
| MV_Schw | C | 673 | 1506 | 44 | 0.0782002414054748  |   |
| MV_Schw | T | 674 | 151  | 3  |                     | 1 |
| MV_Schw | G | 675 | 318  | 2  | 0.192973852022480   |   |
| MV_Schw | A | 676 | 217  | 3  |                     | 1 |
| MV_Schw | T | 677 | 952  | 20 |                     | 1 |
| MV_Schw | T | 678 | 200  | 7  | 0.458442246023077   |   |
| MV_Schw | C | 679 | 713  | 17 | 0.986363032184908   |   |
| MV_Schw | G | 680 | 250  | 7  |                     | 1 |
| MV_Schw | G | 681 | 388  | 3  | 0.288870964410068   |   |
| MV_Schw | A | 682 | 769  | 17 |                     | 1 |

|         |   |     |      |    |                     |
|---------|---|-----|------|----|---------------------|
| MV_Schw | G | 683 | 616  | 9  | 0.819327818667335   |
| MV_Schw | C | 684 | 219  | 7  | 0.516449012907575   |
| MV_Schw | T | 685 | 122  | 6  | 0.151282626616198   |
| MV_Schw | A | 686 | 128  | 4  | 0.840295409296105   |
| MV_Schw | A | 687 | 167  | 3  | 1                   |
| MV_Schw | G | 688 | 293  | 3  | 0.501368851809361   |
| MV_Schw | A | 689 | 74   | 1  | 1                   |
| MV_Schw | A | 690 | 60   | 1  | 1                   |
| MV_Schw | G | 691 | 692  | 15 | 1                   |
| MV_Schw | G | 692 | 196  | 7  | 0.342103452023548   |
| MV_Schw | T | 693 | 112  | 1  | 0.789229943133706   |
| MV_Schw | G | 694 | 979  | 15 | 0.61288939235037    |
| MV_Schw | G | 695 | 1006 | 9  | 0.0154703532481774  |
| MV_Schw | A | 696 | 471  | 5  | 0.461766975079516   |
| MV_Schw | T | 697 | 143  | 0  | 0.161503851613234   |
| MV_Schw | A | 698 | 277  | 1  | 0.139444451992631   |
| MV_Schw | A | 699 | 21   | 0  | 1                   |
| MV_Schw | A | 700 | 868  | 7  | 0.00658757357304602 |
| MV_Schw | G | 701 | 1033 | 14 | 0.307480793677112   |
| MV_Schw | T | 702 | 254  | 2  | 0.436962346550212   |
| MV_Schw | A | 703 | 6    | 0  | 1                   |
| MV_Schw | C | 704 | 430  | 5  | 0.497615650989996   |
| MV_Schw | A | 705 | 140  | 0  | 0.230921379149447   |
| MV_Schw | C | 706 | 128  | 1  | 1                   |
| MV_Schw | C | 707 | 194  | 0  | 0.0651851006268349  |
| MV_Schw | C | 708 | 566  | 6  | 0.277229700444564   |
| MV_Schw | A | 709 | 267  | 5  | 1                   |
| MV_Schw | A | 710 | 23   | 0  | 1                   |
| MV_Schw | C | 711 | 812  | 15 | 1                   |
| MV_Schw | A | 712 | 147  | 3  | 1                   |
| MV_Schw | A | 713 | 188  | 3  | 1                   |
| MV_Schw | A | 714 | 60   | 1  | 1                   |
| MV_Schw | G | 715 | 556  | 11 | 1                   |
| MV_Schw | A | 716 | 47   | 0  | 1                   |
| MV_Schw | A | 717 | 33   | 0  | 1                   |
| MV_Schw | G | 718 | 527  | 13 | 0.94524098805271    |

|         |   |     |      |    |                      |
|---------|---|-----|------|----|----------------------|
| MV_Schw | G | 719 | 72   | 0  | 0.791667533131283    |
| MV_Schw | G | 720 | 101  | 1  | 1                    |
| MV_Schw | T | 721 | 95   | 0  | 0.499662168427985    |
| MV_Schw | A | 722 | 89   | 1  | 1                    |
| MV_Schw | G | 723 | 213  | 2  | 0.73548636006501     |
| MV_Schw | T | 724 | 27   | 0  | 1                    |
| MV_Schw | T | 725 | 64   | 2  | 1                    |
| MV_Schw | G | 726 | 1552 | 13 | 0.000224659131290566 |
| MV_Schw | G | 727 | 1116 | 18 | 0.789229943133706    |
| MV_Schw | T | 728 | 172  | 1  | 0.789229943133706    |
| MV_Schw | G | 729 | 248  | 2  | 0.528869794103543    |
| MV_Schw | A | 730 | 182  | 3  | 1                    |
| MV_Schw | A | 731 | 120  | 1  | 1                    |
| MV_Schw | T | 732 | 578  | 12 | 1                    |
| MV_Schw | T | 733 | 105  | 0  | 0.37877131423274     |
| MV_Schw | T | 734 | 56   | 1  | 1                    |
| MV_Schw | A | 735 | 37   | 0  | 1                    |
| MV_Schw | G | 736 | 178  | 2  | 0.945767847051808    |
| MV_Schw | A | 737 | 432  | 3  | 0.0559946103775228   |
| MV_Schw | T | 738 | 105  | 5  | 0.414034029869785    |
| MV_Schw | T | 739 | 130  | 5  | 0.68615038702224     |
| MV_Schw | G | 740 | 43   | 1  | 1                    |
| MV_Schw | G | 741 | 109  | 1  | 0.947544583923452    |
| MV_Schw | A | 742 | 47   | 1  | 1                    |
| MV_Schw | G | 743 | 2269 | 51 | 1                    |
| MV_Schw | A | 744 | 95   | 2  | 1                    |
| MV_Schw | G | 745 | 977  | 15 | 0.612472877708129    |
| MV_Schw | A | 746 | 240  | 2  | 0.527491093089607    |
| MV_Schw | A | 747 | 238  | 5  | 1                    |
| MV_Schw | A | 748 | 295  | 3  | 0.747277641572764    |
| MV_Schw | A | 749 | 17   | 1  | 0.983041048229953    |
| MV_Schw | T | 750 | 167  | 4  | 1                    |
| MV_Schw | G | 751 | 126  | 3  | 1                    |
| MV_Schw | G | 752 | 2188 | 50 | 0.950262622850522    |
| MV_Schw | T | 753 | 52   | 2  | 0.78354985902497     |
| MV_Schw | T | 754 | 326  | 9  | 0.890162740966923    |

|         |   |     |      |     |                      |
|---------|---|-----|------|-----|----------------------|
| MV_Schw | G | 755 | 132  | 1   | 0.659520109379356    |
| MV_Schw | G | 756 | 172  | 2   | 1                    |
| MV_Schw | A | 757 | 45   | 1   | 1                    |
| MV_Schw | T | 758 | 91   | 5   | 0.217911555108928    |
| MV_Schw | G | 759 | 502  | 15  | 0.43674986023796     |
| MV_Schw | T | 760 | 35   | 0   | 1                    |
| MV_Schw | G | 761 | 128  | 4   | 0.840295409296105    |
| MV_Schw | G | 762 | 806  | 17  | 1                    |
| MV_Schw | T | 763 | 719  | 16  | 1                    |
| MV_Schw | G | 764 | 496  | 7   | 0.756958128686134    |
| MV_Schw | A | 765 | 70   | 2   | 1                    |
| MV_Schw | G | 766 | 205  | 3   | 1                    |
| MV_Schw | G | 767 | 835  | 14  | 0.955096167251408    |
| MV_Schw | A | 768 | 426  | 4   | 0.316968136493880    |
| MV_Schw | A | 769 | 574  | 15  | 0.88950624150852     |
| MV_Schw | C | 770 | 1905 | 31  | 0.560243889454362    |
| MV_Schw | A | 771 | 41   | 1   | 1                    |
| MV_Schw | G | 772 | 1091 | 13  | 0.0798412064354382   |
| MV_Schw | G | 773 | 300  | 4   | 0.950262622850522    |
| MV_Schw | A | 774 | 271  | 5   | 1                    |
| MV_Schw | T | 775 | 506  | 7   | 0.822598489333375    |
| MV_Schw | T | 776 | 256  | 2   | 0.437582500382461    |
| MV_Schw | G | 777 | 1339 | 13  | 0.00315950084157037  |
| MV_Schw | C | 778 | 1537 | 12  | 4.86812568912563e-05 |
| MV_Schw | C | 779 | 3171 | 23  | 8.93638098663723e-12 |
| MV_Schw | G | 780 | 3576 | 117 | 1.13711934179409e-06 |
| MV_Schw | A | 781 | 450  | 3   | 0.122793117967339    |
| MV_Schw | G | 782 | 775  | 27  | 0.0213237354880237   |
| MV_Schw | G | 783 | 345  | 8   | 1                    |
| MV_Schw | A | 784 | 52   | 2   | 0.78354985902497     |
| MV_Schw | C | 785 | 630  | 9   | 0.619445085664392    |
| MV_Schw | C | 786 | 122  | 0   | 0.298485329352986    |
| MV_Schw | T | 787 | 107  | 1   | 1                    |
| MV_Schw | C | 788 | 331  | 2   | 0.150659907408196    |
| MV_Schw | T | 789 | 66   | 1   | 1                    |
| MV_Schw | C | 790 | 610  | 8   | 0.591710523111113    |

|         |   |     |      |    |                      |
|---------|---|-----|------|----|----------------------|
| MV_Schw | C | 791 | 607  | 6  | 0.158882742848662    |
| MV_Schw | T | 792 | 89   | 2  | 1                    |
| MV_Schw | T | 793 | 149  | 3  | 1                    |
| MV_Schw | A | 794 | 66   | 1  | 1                    |
| MV_Schw | C | 795 | 835  | 7  | 0.0107693693121348   |
| MV_Schw | G | 796 | 527  | 9  | 1                    |
| MV_Schw | C | 797 | 159  | 1  | 0.78470776546672     |
| MV_Schw | C | 798 | 171  | 4  | 1                    |
| MV_Schw | G | 799 | 196  | 3  | 1                    |
| MV_Schw | A | 800 | 198  | 2  | 0.822598489333375    |
| MV_Schw | T | 801 | 169  | 1  | 0.789229943133706    |
| MV_Schw | T | 802 | 23   | 0  | 1                    |
| MV_Schw | C | 803 | 66   | 0  | 0.789229943133706    |
| MV_Schw | A | 804 | 25   | 1  | 1                    |
| MV_Schw | T | 805 | 37   | 0  | 1                    |
| MV_Schw | G | 806 | 1643 | 16 | 0.000995996993405964 |
| MV_Schw | G | 807 | 134  | 3  | 1                    |
| MV_Schw | T | 808 | 33   | 0  | 1                    |
| MV_Schw | C | 809 | 64   | 1  | 1                    |
| MV_Schw | G | 810 | 1006 | 5  | 1.14405532250546e-05 |
| MV_Schw | C | 811 | 1050 | 7  | 0.0004613385200991   |
| MV_Schw | T | 812 | 147  | 1  | 0.88950624150852     |
| MV_Schw | C | 813 | 190  | 1  | 0.282444566862733    |
| MV_Schw | T | 814 | 140  | 2  | 1                    |
| MV_Schw | A | 815 | 47   | 0  | 1                    |
| MV_Schw | A | 816 | 48   | 1  | 1                    |
| MV_Schw | T | 817 | 132  | 0  | 0.222002676269896    |
| MV_Schw | C | 818 | 147  | 1  | 0.88950624150852     |
| MV_Schw | C | 819 | 143  | 3  | 1                    |
| MV_Schw | T | 820 | 103  | 2  | 1                    |
| MV_Schw | G | 821 | 1143 | 5  | 4.6708854323247e-07  |
| MV_Schw | G | 822 | 1207 | 7  | 2.01563946828321e-05 |
| MV_Schw | A | 823 | 178  | 3  | 1                    |
| MV_Schw | T | 824 | 306  | 3  | 0.645428736569362    |
| MV_Schw | A | 825 | 10   | 0  | 1                    |
| MV_Schw | T | 826 | 6    | 0  | 1                    |



|         |   |     |      |    |                      |
|---------|---|-----|------|----|----------------------|
| MV_Schw | C | 827 | 157  | 0  | 0.118807954027477    |
| MV_Schw | A | 828 | 136  | 0  | 0.224063006917908    |
| MV_Schw | A | 829 | 1058 | 7  | 0.000139663842671857 |
| MV_Schw | G | 830 | 855  | 6  | 0.00288269095915584  |
| MV_Schw | A | 831 | 488  | 5  | 0.391888109903514    |
| MV_Schw | G | 832 | 287  | 3  | 0.822598489333375    |
| MV_Schw | A | 833 | 47   | 1  | 1                    |
| MV_Schw | A | 834 | 45   | 1  | 1                    |
| MV_Schw | C | 835 | 924  | 11 | 0.215757612560076    |
| MV_Schw | A | 836 | 19   | 0  | 1                    |
| MV_Schw | C | 837 | 289  | 3  | 0.746970975838775    |
| MV_Schw | C | 838 | 547  | 1  | 0.000257904678727486 |
| MV_Schw | C | 839 | 984  | 9  | 0.0190173980479571   |
| MV_Schw | G | 840 | 1397 | 17 | 0.0764963438320201   |
| MV_Schw | G | 841 | 893  | 10 | 0.128962685287769    |
| MV_Schw | A | 842 | 800  | 7  | 0.0173071686470696   |
| MV_Schw | A | 843 | 310  | 3  | 0.426789350155389    |
| MV_Schw | A | 844 | 50   | 2  | 0.746970975838775    |
| MV_Schw | C | 845 | 996  | 15 | 0.550155392537109    |
| MV_Schw | A | 846 | 50   | 1  | 1                    |
| MV_Schw | A | 847 | 64   | 3  | 0.609091736782917    |
| MV_Schw | A | 848 | 391  | 6  | 1                    |
| MV_Schw | C | 849 | 1694 | 34 | 1                    |
| MV_Schw | C | 850 | 523  | 4  | 0.0752670771840998   |
| MV_Schw | C | 851 | 337  | 5  | 0.957721317456694    |
| MV_Schw | A | 852 | 233  | 5  | 1                    |
| MV_Schw | G | 853 | 1176 | 30 | 0.644822204110556    |
| MV_Schw | G | 854 | 979  | 27 | 0.386416157439658    |
| MV_Schw | A | 855 | 112  | 4  | 0.648224297390367    |
| MV_Schw | T | 856 | 35   | 1  | 1                    |
| MV_Schw | T | 857 | 17   | 0  | 1                    |
| MV_Schw | G | 858 | 250  | 1  | 0.234360961542297    |
| MV_Schw | C | 859 | 403  | 4  | 0.37877131423274     |
| MV_Schw | T | 860 | 83   | 1  | 1                    |
| MV_Schw | G | 861 | 1490 | 18 | 0.0433621496283548   |
| MV_Schw | A | 862 | 64   | 1  | 1                    |

|         |   |     |     |    |                   |
|---------|---|-----|-----|----|-------------------|
| MV_Schw | A | 863 | 124 | 1  | 0.791667533131283 |
| MV_Schw | A | 864 | 130 | 2  | 1                 |
| MV_Schw | T | 865 | 161 | 1  | 0.78470776546672  |
| MV_Schw | G | 866 | 52  | 2  | 0.78354985902497  |
| MV_Schw | A | 867 | 4   | 0  | 1                 |
| MV_Schw | T | 868 | 72  | 1  | 1                 |
| MV_Schw | A | 869 | 79  | 1  | 1                 |
| MV_Schw | T | 870 | 17  | 1  | 0.528591092326266 |
| MV_Schw | G | 871 | 357 | 5  | 0.795198078226602 |
| MV_Schw | T | 872 | 41  | 0  | 1                 |
| MV_Schw | G | 873 | 205 | 4  | 1                 |
| MV_Schw | A | 874 | 66  | 0  | 0.789229943133706 |
| MV_Schw | C | 875 | 463 | 10 | 1                 |
| MV_Schw | A | 876 | 64  | 2  | 1                 |
| MV_Schw | T | 877 | 45  | 0  | 1                 |
| MV_Schw | T | 878 | 6   | 0  | 1                 |
| MV_Schw | G | 879 | 89  | 1  | 1                 |
| MV_Schw | A | 880 | 17  | 0  | 1                 |
| MV_Schw | T | 881 | 54  | 1  | 1                 |
| MV_Schw | A | 882 | 35  | 1  | 1                 |
| MV_Schw | C | 883 | 159 | 1  | 0.437783686960654 |
| MV_Schw | A | 884 | 12  | 0  | 1                 |
| MV_Schw | T | 885 | 12  | 0  | 1                 |
| MV_Schw | A | 886 | 68  | 0  | 0.789229943133706 |
| MV_Schw | T | 887 | 21  | 0  | 1                 |
| MV_Schw | A | 888 | 62  | 1  | 1                 |
| MV_Schw | T | 889 | 4   | 0  | 1                 |
| MV_Schw | C | 890 | 172 | 3  | 1                 |
| MV_Schw | G | 891 | 250 | 4  | 1                 |
| MV_Schw | T | 892 | 48  | 1  | 1                 |
| MV_Schw | A | 893 | 33  | 0  | 1                 |
| MV_Schw | G | 894 | 200 | 1  | 0.549697051814019 |
| MV_Schw | A | 895 | 23  | 0  | 1                 |
| MV_Schw | G | 896 | 147 | 5  | 0.77901773725233  |
| MV_Schw | G | 897 | 560 | 5  | 0.093350846445046 |
| MV_Schw | C | 898 | 87  | 1  | 1                 |

|         |   |     |      |    |                      |
|---------|---|-----|------|----|----------------------|
| MV_Schw | A | 899 | 31   | 0  | 1                    |
| MV_Schw | G | 900 | 322  | 7  | 1                    |
| MV_Schw | G | 901 | 707  | 8  | 0.224063006917908    |
| MV_Schw | A | 902 | 93   | 2  | 1                    |
| MV_Schw | T | 903 | 52   | 0  | 0.950262622850522    |
| MV_Schw | T | 904 | 25   | 1  | 0.704667204683568    |
| MV_Schw | A | 905 | 70   | 0  | 0.789229943133706    |
| MV_Schw | G | 906 | 515  | 10 | 1                    |
| MV_Schw | C | 907 | 874  | 5  | 0.000672646784089299 |
| MV_Schw | C | 908 | 1190 | 13 | 0.0264902346937876   |
| MV_Schw | A | 909 | 41   | 1  | 1                    |
| MV_Schw | G | 910 | 409  | 6  | 0.950262622850522    |
| MV_Schw | T | 911 | 83   | 0  | 0.645428736569362    |
| MV_Schw | T | 912 | 25   | 0  | 1                    |
| MV_Schw | T | 913 | 64   | 1  | 1                    |
| MV_Schw | T | 914 | 29   | 0  | 1                    |
| MV_Schw | A | 915 | 29   | 0  | 1                    |
| MV_Schw | T | 916 | 70   | 3  | 0.395791012435089    |
| MV_Schw | C | 917 | 258  | 7  | 1                    |
| MV_Schw | C | 918 | 138  | 3  | 1                    |
| MV_Schw | T | 919 | 171  | 0  | 0.0850400511116103   |
| MV_Schw | G | 920 | 21   | 1  | 1                    |
| MV_Schw | A | 921 | 31   | 0  | 1                    |
| MV_Schw | C | 922 | 103  | 0  | 0.37877131423274     |
| MV_Schw | T | 923 | 12   | 1  | 0.366832525336205    |
| MV_Schw | A | 924 | 23   | 1  | 1                    |
| MV_Schw | T | 925 | 17   | 0  | 1                    |
| MV_Schw | T | 926 | 17   | 0  | 1                    |
| MV_Schw | A | 927 | 8    | 0  | 1                    |
| MV_Schw | A | 928 | 10   | 0  | 1                    |
| MV_Schw | G | 929 | 186  | 3  | 1                    |
| MV_Schw | T | 930 | 31   | 0  | 1                    |
| MV_Schw | T | 931 | 85   | 2  | 1                    |
| MV_Schw | T | 932 | 16   | 0  | 1                    |
| MV_Schw | G | 933 | 48   | 0  | 0.950262622850522    |
| MV_Schw | G | 934 | 10   | 1  | 0.307480793677112    |

|         |   |     |     |   |                    |   |
|---------|---|-----|-----|---|--------------------|---|
| MV_Schw | G | 935 | 140 | 2 |                    | 1 |
| MV_Schw | A | 936 | 25  | 0 |                    | 1 |
| MV_Schw | T | 937 | 101 | 1 |                    | 1 |
| MV_Schw | A | 938 | 37  | 1 |                    | 1 |
| MV_Schw | G | 939 | 364 | 3 | 0.331291103747922  |   |
| MV_Schw | A | 940 | 560 | 9 |                    | 1 |
| MV_Schw | A | 941 | 78  | 1 |                    | 1 |
| MV_Schw | A | 942 | 74  | 0 | 0.795198078226602  |   |
| MV_Schw | C | 943 | 130 | 3 |                    | 1 |
| MV_Schw | T | 944 | 678 | 9 | 0.568356398818363  |   |
| MV_Schw | A | 945 | 87  | 1 |                    | 1 |
| MV_Schw | T | 946 | 70  | 0 | 0.789229943133706  |   |
| MV_Schw | G | 947 | 266 | 1 | 0.182730995624231  |   |
| MV_Schw | T | 948 | 8   | 0 |                    | 1 |
| MV_Schw | A | 949 | 141 | 3 |                    | 1 |
| MV_Schw | T | 950 | 143 | 6 | 0.307162781591674  |   |
| MV_Schw | C | 951 | 101 | 1 |                    | 1 |
| MV_Schw | C | 952 | 244 | 3 | 0.789229943133706  |   |
| MV_Schw | T | 953 | 159 | 1 | 0.78470776546672   |   |
| MV_Schw | G | 954 | 112 | 1 | 0.789229943133706  |   |
| MV_Schw | C | 955 | 477 | 5 | 0.258627633593378  |   |
| MV_Schw | T | 956 | 107 | 1 |                    | 1 |
| MV_Schw | C | 957 | 452 | 4 | 0.226501401371001  |   |
| MV_Schw | T | 958 | 103 | 1 |                    | 1 |
| MV_Schw | T | 959 | 60  | 1 |                    | 1 |
| MV_Schw | G | 960 | 149 | 3 |                    | 1 |
| MV_Schw | G | 961 | 194 | 3 |                    | 1 |
| MV_Schw | A | 962 | 47  | 1 |                    | 1 |
| MV_Schw | C | 963 | 99  | 2 |                    | 1 |
| MV_Schw | T | 964 | 10  | 0 |                    | 1 |
| MV_Schw | G | 965 | 74  | 1 |                    | 1 |
| MV_Schw | C | 966 | 422 | 3 | 0.073283477888091  |   |
| MV_Schw | A | 967 | 138 | 2 |                    | 1 |
| MV_Schw | T | 968 | 242 | 1 | 0.0905766504838092 |   |
| MV_Schw | G | 969 | 101 | 0 | 0.51781700540984   |   |
| MV_Schw | A | 970 | 10  | 0 |                    | 1 |

|         |   |      |      |    |                     |   |
|---------|---|------|------|----|---------------------|---|
| MV_Schw | A | 971  | 103  | 1  |                     | 1 |
| MV_Schw | T | 972  | 27   | 1  |                     | 1 |
| MV_Schw | T | 973  | 167  | 1  | 0.341186273229673   |   |
| MV_Schw | T | 974  | 58   | 0  | 0.953489044526869   |   |
| MV_Schw | G | 975  | 393  | 1  | 0.0142038926834362  |   |
| MV_Schw | C | 976  | 517  | 3  | 0.0354080810355288  |   |
| MV_Schw | T | 977  | 205  | 3  |                     | 1 |
| MV_Schw | G | 978  | 134  | 1  | 0.66330042087892    |   |
| MV_Schw | G | 979  | 271  | 3  | 0.944879389258477   |   |
| MV_Schw | T | 980  | 19   | 0  |                     | 1 |
| MV_Schw | G | 981  | 258  | 3  | 0.681308121427830   |   |
| MV_Schw | A | 982  | 41   | 0  |                     | 1 |
| MV_Schw | G | 983  | 498  | 7  | 0.758785708915173   |   |
| MV_Schw | T | 984  | 8    | 0  |                     | 1 |
| MV_Schw | T | 985  | 72   | 1  |                     | 1 |
| MV_Schw | A | 986  | 202  | 2  | 0.822598489333375   |   |
| MV_Schw | T | 987  | 277  | 3  | 0.598480293360952   |   |
| MV_Schw | C | 988  | 1523 | 15 | 0.00135996302051693 |   |
| MV_Schw | C | 989  | 1095 | 15 | 0.376229278421421   |   |
| MV_Schw | A | 990  | 43   | 0  |                     | 1 |
| MV_Schw | C | 991  | 234  | 3  | 0.88950624150852    |   |
| MV_Schw | A | 992  | 93   | 0  | 0.498091317793217   |   |
| MV_Schw | C | 993  | 422  | 3  | 0.151179205109552   |   |
| MV_Schw | T | 994  | 62   | 1  |                     | 1 |
| MV_Schw | T | 995  | 33   | 0  |                     | 1 |
| MV_Schw | G | 996  | 188  | 1  | 0.542247232322076   |   |
| MV_Schw | A | 997  | 12   | 2  | 0.0975104748468945  |   |
| MV_Schw | G | 998  | 453  | 9  |                     | 1 |
| MV_Schw | T | 999  | 19   | 1  |                     | 1 |
| MV_Schw | C | 1000 | 178  | 3  |                     | 1 |
| MV_Schw | C | 1001 | 64   | 0  | 0.789229943133706   |   |
| MV_Schw | T | 1002 | 31   | 0  |                     | 1 |
| MV_Schw | T | 1003 | 186  | 1  | 0.655978174231774   |   |
| MV_Schw | G | 1004 | 731  | 4  | 0.00131552010647586 |   |
| MV_Schw | A | 1005 | 54   | 1  |                     | 1 |
| MV_Schw | T | 1006 | 355  | 3  | 0.397437008479015   |   |

|         |   |      |      |    |                      |   |
|---------|---|------|------|----|----------------------|---|
| MV_Schw | G | 1007 | 68   | 1  |                      | 1 |
| MV_Schw | A | 1008 | 27   | 0  |                      | 1 |
| MV_Schw | A | 1009 | 43   | 1  |                      | 1 |
| MV_Schw | C | 1010 | 260  | 5  |                      | 1 |
| MV_Schw | C | 1011 | 364  | 4  | 0.619556855087002    |   |
| MV_Schw | T | 1012 | 76   | 1  |                      | 1 |
| MV_Schw | T | 1013 | 19   | 0  |                      | 1 |
| MV_Schw | T | 1014 | 81   | 1  |                      | 1 |
| MV_Schw | A | 1015 | 213  | 3  |                      | 1 |
| MV_Schw | C | 1016 | 240  | 3  |                      | 1 |
| MV_Schw | C | 1017 | 289  | 1  | 0.107199991629516    |   |
| MV_Schw | A | 1018 | 138  | 3  |                      | 1 |
| MV_Schw | G | 1019 | 99   | 1  |                      | 1 |
| MV_Schw | C | 1020 | 116  | 3  | 0.957721317456694    |   |
| MV_Schw | A | 1021 | 246  | 3  | 0.789229943133706    |   |
| MV_Schw | A | 1022 | 76   | 1  |                      | 1 |
| MV_Schw | A | 1023 | 52   | 0  | 0.950262622850522    |   |
| MV_Schw | T | 1024 | 190  | 3  |                      | 1 |
| MV_Schw | G | 1025 | 83   | 1  |                      | 1 |
| MV_Schw | G | 1026 | 314  | 1  | 0.0845982032753081   |   |
| MV_Schw | G | 1027 | 519  | 3  | 0.0357008028146501   |   |
| MV_Schw | G | 1028 | 1172 | 7  | 4.89408480641907e-05 |   |
| MV_Schw | G | 1029 | 320  | 3  | 0.555306456571188    |   |
| MV_Schw | A | 1030 | 97   | 1  |                      | 1 |
| MV_Schw | A | 1031 | 50   | 1  |                      | 1 |
| MV_Schw | A | 1032 | 126  | 0  | 0.305061614162072    |   |
| MV_Schw | C | 1033 | 1391 | 13 | 0.00304912903726012  |   |
| MV_Schw | T | 1034 | 176  | 1  | 0.34703042205032     |   |
| MV_Schw | G | 1035 | 386  | 6  |                      | 1 |
| MV_Schw | C | 1036 | 719  | 9  | 0.318295249699595    |   |
| MV_Schw | A | 1037 | 215  | 4  |                      | 1 |
| MV_Schw | C | 1038 | 153  | 1  | 0.436311974989592    |   |
| MV_Schw | C | 1039 | 211  | 1  | 0.445919862395878    |   |
| MV_Schw | C | 1040 | 107  | 3  | 0.950262622850522    |   |
| MV_Schw | T | 1041 | 23   | 0  |                      | 1 |
| MV_Schw | A | 1042 | 19   | 1  |                      | 1 |

|         |   |      |     |    |                     |
|---------|---|------|-----|----|---------------------|
| MV_Schw | C | 1043 | 209 | 1  | 0.444605338381727   |
| MV_Schw | A | 1044 | 25  | 0  | 1                   |
| MV_Schw | T | 1045 | 343 | 5  | 1                   |
| MV_Schw | G | 1046 | 68  | 1  | 1                   |
| MV_Schw | G | 1047 | 149 | 1  | 0.550155392537109   |
| MV_Schw | T | 1048 | 37  | 1  | 1                   |
| MV_Schw | A | 1049 | 12  | 1  | 0.88950624150852    |
| MV_Schw | A | 1050 | 238 | 1  | 0.297586725038221   |
| MV_Schw | T | 1051 | 31  | 3  | 0.172254498719137   |
| MV_Schw | C | 1052 | 85  | 1  | 1                   |
| MV_Schw | C | 1053 | 262 | 3  | 0.682748760038921   |
| MV_Schw | T | 1054 | 74  | 1  | 1                   |
| MV_Schw | G | 1055 | 996 | 11 | 0.0922714502692794  |
| MV_Schw | G | 1056 | 488 | 9  | 1                   |
| MV_Schw | A | 1057 | 234 | 3  | 1                   |
| MV_Schw | G | 1058 | 422 | 13 | 0.518605193203296   |
| MV_Schw | A | 1059 | 6   | 0  | 1                   |
| MV_Schw | A | 1060 | 60  | 0  | 0.957721317456694   |
| MV_Schw | C | 1061 | 709 | 14 | 1                   |
| MV_Schw | T | 1062 | 56  | 0  | 0.950262622850522   |
| MV_Schw | C | 1063 | 81  | 2  | 1                   |
| MV_Schw | A | 1064 | 33  | 1  | 0.822598489333375   |
| MV_Schw | A | 1065 | 192 | 2  | 0.822598489333375   |
| MV_Schw | T | 1066 | 343 | 4  | 0.689515687276991   |
| MV_Schw | T | 1067 | 60  | 1  | 1                   |
| MV_Schw | C | 1068 | 43  | 0  | 1                   |
| MV_Schw | A | 1069 | 17  | 0  | 1                   |
| MV_Schw | G | 1070 | 349 | 4  | 0.694090103313075   |
| MV_Schw | A | 1071 | 676 | 3  | 0.00162877509201589 |
| MV_Schw | A | 1072 | 25  | 1  | 1                   |
| MV_Schw | C | 1073 | 138 | 3  | 1                   |
| MV_Schw | A | 1074 | 4   | 0  | 1                   |
| MV_Schw | A | 1075 | 2   | 0  | 1                   |
| MV_Schw | G | 1076 | 390 | 7  | 1                   |
| MV_Schw | T | 1077 | 29  | 0  | 1                   |
| MV_Schw | T | 1078 | 25  | 0  | 1                   |

|         |   |      |      |    |                    |
|---------|---|------|------|----|--------------------|
| MV_Schw | C | 1079 | 91   | 0  | 0.497615650989996  |
| MV_Schw | A | 1080 | 130  | 2  | 1                  |
| MV_Schw | G | 1081 | 240  | 1  | 0.298485329352986  |
| MV_Schw | T | 1082 | 89   | 2  | 1                  |
| MV_Schw | G | 1083 | 382  | 5  | 0.94331577055384   |
| MV_Schw | C | 1084 | 500  | 6  | 0.497615650989996  |
| MV_Schw | A | 1085 | 66   | 0  | 0.789229943133706  |
| MV_Schw | G | 1086 | 547  | 9  | 0.991517221373143  |
| MV_Schw | G | 1087 | 702  | 6  | 0.045275965087549  |
| MV_Schw | A | 1088 | 110  | 1  | 0.789229943133706  |
| MV_Schw | T | 1089 | 45   | 1  | 1                  |
| MV_Schw | C | 1090 | 229  | 5  | 1                  |
| MV_Schw | A | 1091 | 318  | 4  | 0.86779706041355   |
| MV_Schw | T | 1092 | 101  | 2  | 1                  |
| MV_Schw | A | 1093 | 130  | 1  | 0.983041048229953  |
| MV_Schw | C | 1094 | 432  | 5  | 0.683711014434815  |
| MV_Schw | C | 1095 | 242  | 4  | 1                  |
| MV_Schw | C | 1096 | 851  | 15 | 1                  |
| MV_Schw | T | 1097 | 105  | 2  | 1                  |
| MV_Schw | C | 1098 | 1417 | 17 | 0.0352560908509823 |
| MV_Schw | T | 1099 | 79   | 1  | 1                  |
| MV_Schw | G | 1100 | 287  | 3  | 0.822598489333375  |
| MV_Schw | C | 1101 | 647  | 10 | 0.926705050780544  |
| MV_Schw | T | 1102 | 279  | 3  | 0.819327818667335  |
| MV_Schw | C | 1103 | 252  | 1  | 0.235179608025014  |
| MV_Schw | T | 1104 | 393  | 1  | 0.0142038926834362 |
| MV_Schw | G | 1105 | 182  | 3  | 1                  |
| MV_Schw | G | 1106 | 374  | 7  | 1                  |
| MV_Schw | A | 1107 | 116  | 1  | 0.789229943133706  |
| MV_Schw | G | 1108 | 297  | 3  | 0.747415194406969  |
| MV_Schw | C | 1109 | 48   | 1  | 1                  |
| MV_Schw | T | 1110 | 12   | 1  | 0.88950624150852   |
| MV_Schw | A | 1111 | 134  | 1  | 0.66330042087892   |
| MV_Schw | T | 1112 | 41   | 0  | 1                  |
| MV_Schw | G | 1113 | 252  | 7  | 0.791667533131283  |
| MV_Schw | C | 1114 | 21   | 1  | 1                  |



|         |   |      |     |    |                    |   |
|---------|---|------|-----|----|--------------------|---|
| MV_Schw | C | 1115 | 153 | 2  |                    | 1 |
| MV_Schw | A | 1116 | 85  | 0  | 0.648224297390367  |   |
| MV_Schw | T | 1117 | 138 | 3  |                    | 1 |
| MV_Schw | G | 1118 | 136 | 0  | 0.224063006917908  |   |
| MV_Schw | G | 1119 | 285 | 6  |                    | 1 |
| MV_Schw | G | 1120 | 93  | 3  | 0.747390316041078  |   |
| MV_Schw | A | 1121 | 17  | 0  |                    | 1 |
| MV_Schw | G | 1122 | 289 | 5  |                    | 1 |
| MV_Schw | T | 1123 | 93  | 3  |                    | 1 |
| MV_Schw | A | 1124 | 21  | 1  |                    | 1 |
| MV_Schw | G | 1125 | 107 | 4  | 0.619556855087002  |   |
| MV_Schw | G | 1126 | 105 | 3  | 0.950262622850522  |   |
| MV_Schw | A | 1127 | 99  | 1  |                    | 1 |
| MV_Schw | G | 1128 | 459 | 13 | 0.742284060476214  |   |
| MV_Schw | T | 1129 | 411 | 9  |                    | 1 |
| MV_Schw | G | 1130 | 552 | 5  | 0.0920236669024428 |   |
| MV_Schw | G | 1131 | 136 | 1  | 0.667619064364632  |   |
| MV_Schw | A | 1132 | 151 | 3  |                    | 1 |
| MV_Schw | A | 1133 | 196 | 9  | 0.113545263513278  |   |
| MV_Schw | C | 1134 | 407 | 6  | 0.950262622850522  |   |
| MV_Schw | T | 1135 | 140 | 2  |                    | 1 |
| MV_Schw | T | 1136 | 178 | 2  | 0.945767847051808  |   |
| MV_Schw | G | 1137 | 395 | 7  |                    | 1 |
| MV_Schw | A | 1138 | 89  | 1  |                    | 1 |
| MV_Schw | A | 1139 | 64  | 1  |                    | 1 |
| MV_Schw | A | 1140 | 78  | 2  |                    | 1 |
| MV_Schw | A | 1141 | 60  | 1  |                    | 1 |
| MV_Schw | C | 1142 | 217 | 2  | 0.740382532463064  |   |
| MV_Schw | T | 1143 | 8   | 0  |                    | 1 |
| MV_Schw | C | 1144 | 172 | 3  |                    | 1 |
| MV_Schw | C | 1145 | 579 | 10 |                    | 1 |
| MV_Schw | A | 1146 | 29  | 1  |                    | 1 |
| MV_Schw | T | 1147 | 39  | 0  |                    | 1 |
| MV_Schw | G | 1148 | 52  | 1  |                    | 1 |
| MV_Schw | G | 1149 | 209 | 1  | 0.444605338381727  |   |
| MV_Schw | G | 1150 | 50  | 0  | 0.950262622850522  |   |

|         |   |      |     |    |                     |   |
|---------|---|------|-----|----|---------------------|---|
| MV_Schw | A | 1151 | 16  | 0  |                     | 1 |
| MV_Schw | G | 1152 | 694 | 12 |                     | 1 |
| MV_Schw | G | 1153 | 112 | 0  | 0.390108970321283   |   |
| MV_Schw | T | 1154 | 116 | 1  | 0.789229943133706   |   |
| MV_Schw | T | 1155 | 31  | 1  |                     | 1 |
| MV_Schw | T | 1156 | 101 | 1  |                     | 1 |
| MV_Schw | G | 1157 | 178 | 2  | 0.945767847051808   |   |
| MV_Schw | A | 1158 | 21  | 0  |                     | 1 |
| MV_Schw | A | 1159 | 167 | 0  | 0.124094801360285   |   |
| MV_Schw | C | 1160 | 558 | 3  | 0.0159899572258990  |   |
| MV_Schw | T | 1161 | 21  | 1  |                     | 1 |
| MV_Schw | T | 1162 | 8   | 0  |                     | 1 |
| MV_Schw | T | 1163 | 107 | 1  |                     | 1 |
| MV_Schw | G | 1164 | 988 | 9  | 0.0191268080716238  |   |
| MV_Schw | G | 1165 | 744 | 5  | 0.00810089758218598 |   |
| MV_Schw | C | 1166 | 258 | 4  |                     | 1 |
| MV_Schw | C | 1167 | 178 | 5  | 0.804012574266476   |   |
| MV_Schw | G | 1168 | 52  | 1  |                     | 1 |
| MV_Schw | A | 1169 | 37  | 1  |                     | 1 |
| MV_Schw | T | 1170 | 110 | 0  | 0.385864542883514   |   |
| MV_Schw | C | 1171 | 140 | 1  | 0.542247232322076   |   |
| MV_Schw | T | 1172 | 27  | 1  |                     | 1 |
| MV_Schw | T | 1173 | 14  | 1  | 0.944879389258477   |   |
| MV_Schw | A | 1174 | 6   | 0  |                     | 1 |
| MV_Schw | C | 1175 | 795 | 9  | 0.149410316012570   |   |
| MV_Schw | T | 1176 | 10  | 0  |                     | 1 |
| MV_Schw | T | 1177 | 25  | 0  |                     | 1 |
| MV_Schw | T | 1178 | 23  | 0  |                     | 1 |
| MV_Schw | G | 1179 | 54  | 0  | 0.950262622850522   |   |
| MV_Schw | A | 1180 | 37  | 0  |                     | 1 |
| MV_Schw | T | 1181 | 190 | 3  |                     | 1 |
| MV_Schw | C | 1182 | 209 | 3  |                     | 1 |
| MV_Schw | C | 1183 | 17  | 0  |                     | 1 |
| MV_Schw | A | 1184 | 35  | 1  |                     | 1 |
| MV_Schw | G | 1185 | 386 | 10 | 0.944944073306986   |   |
| MV_Schw | C | 1186 | 578 | 9  | 0.887930499252911   |   |

|         |   |      |      |    |                     |
|---------|---|------|------|----|---------------------|
| MV_Schw | A | 1187 | 95   | 4  | 0.542247232322076   |
| MV_Schw | T | 1188 | 19   | 0  | 1                   |
| MV_Schw | A | 1189 | 351  | 2  | 0.120225042415416   |
| MV_Schw | T | 1190 | 35   | 1  | 0.863499923807603   |
| MV_Schw | T | 1191 | 180  | 3  | 1                   |
| MV_Schw | T | 1192 | 33   | 0  | 1                   |
| MV_Schw | T | 1193 | 203  | 2  | 0.822598489333375   |
| MV_Schw | A | 1194 | 14   | 0  | 1                   |
| MV_Schw | G | 1195 | 579  | 4  | 0.0284220601745394  |
| MV_Schw | A | 1196 | 21   | 0  | 1                   |
| MV_Schw | T | 1197 | 47   | 0  | 1                   |
| MV_Schw | T | 1198 | 16   | 0  | 1                   |
| MV_Schw | A | 1199 | 16   | 0  | 1                   |
| MV_Schw | G | 1200 | 260  | 3  | 0.681693930547946   |
| MV_Schw | G | 1201 | 266  | 4  | 1                   |
| MV_Schw | G | 1202 | 859  | 18 | 1                   |
| MV_Schw | C | 1203 | 72   | 0  | 0.791667533131283   |
| MV_Schw | A | 1204 | 81   | 1  | 1                   |
| MV_Schw | A | 1205 | 64   | 1  | 1                   |
| MV_Schw | G | 1206 | 295  | 4  | 0.950262622850522   |
| MV_Schw | A | 1207 | 174  | 3  | 1                   |
| MV_Schw | G | 1208 | 252  | 1  | 0.235179608025014   |
| MV_Schw | A | 1209 | 196  | 3  | 1                   |
| MV_Schw | T | 1210 | 372  | 3  | 0.197481828755388   |
| MV_Schw | G | 1211 | 254  | 2  | 0.436962346550212   |
| MV_Schw | G | 1212 | 467  | 2  | 0.00932485537558293 |
| MV_Schw | T | 1213 | 494  | 5  | 0.395791012435089   |
| MV_Schw | A | 1214 | 595  | 4  | 0.0221470025606877  |
| MV_Schw | A | 1215 | 362  | 3  | 0.192280161800425   |
| MV_Schw | G | 1216 | 630  | 4  | 0.00979840594061844 |
| MV_Schw | G | 1217 | 345  | 2  | 0.118404761941972   |
| MV_Schw | A | 1218 | 47   | 1  | 1                   |
| MV_Schw | G | 1219 | 320  | 7  | 1                   |
| MV_Schw | G | 1220 | 2419 | 34 | 0.0529105666346528  |
| MV_Schw | T | 1221 | 31   | 0  | 1                   |
| MV_Schw | C | 1222 | 777  | 9  | 0.26728210713178    |

|         |   |      |      |    |                    |   |
|---------|---|------|------|----|--------------------|---|
| MV_Schw | A | 1223 | 126  | 1  |                    | 1 |
| MV_Schw | G | 1224 | 736  | 14 |                    | 1 |
| MV_Schw | C | 1225 | 1132 | 19 | 0.822598489333375  |   |
| MV_Schw | T | 1226 | 971  | 11 | 0.130920864943236  |   |
| MV_Schw | G | 1227 | 2860 | 39 | 0.0155102898705156 |   |
| MV_Schw | G | 1228 | 835  | 11 | 0.341567416594811  |   |
| MV_Schw | A | 1229 | 110  | 3  | 0.950262622850522  |   |
| MV_Schw | A | 1230 | 165  | 6  | 0.497615650989996  |   |
| MV_Schw | A | 1231 | 56   | 1  |                    | 1 |
| MV_Schw | G | 1232 | 246  | 9  | 0.260518839802135  |   |
| MV_Schw | G | 1233 | 1329 | 11 | 0.0008173854973521 |   |
| MV_Schw | T | 1234 | 16   | 0  |                    | 1 |
| MV_Schw | C | 1235 | 291  | 3  | 0.746970975838775  |   |
| MV_Schw | A | 1236 | 33   | 1  | 0.822598489333375  |   |
| MV_Schw | G | 1237 | 831  | 12 | 0.598742953957089  |   |
| MV_Schw | T | 1238 | 64   | 1  |                    | 1 |
| MV_Schw | T | 1239 | 641  | 11 |                    | 1 |
| MV_Schw | C | 1240 | 140  | 3  |                    | 1 |
| MV_Schw | C | 1241 | 174  | 3  |                    | 1 |
| MV_Schw | A | 1242 | 79   | 1  |                    | 1 |
| MV_Schw | C | 1243 | 548  | 9  | 0.9922574329168    |   |
| MV_Schw | A | 1244 | 136  | 1  | 0.983041048229953  |   |
| MV_Schw | T | 1245 | 236  | 5  |                    | 1 |
| MV_Schw | T | 1246 | 140  | 2  |                    | 1 |
| MV_Schw | G | 1247 | 136  | 1  | 0.983041048229953  |   |
| MV_Schw | G | 1248 | 153  | 3  |                    | 1 |
| MV_Schw | C | 1249 | 76   | 1  |                    | 1 |
| MV_Schw | A | 1250 | 198  | 2  | 0.822598489333375  |   |
| MV_Schw | T | 1251 | 130  | 3  |                    | 1 |
| MV_Schw | C | 1252 | 331  | 5  |                    | 1 |
| MV_Schw | T | 1253 | 43   | 1  | 0.950262622850522  |   |
| MV_Schw | G | 1254 | 128  | 2  |                    | 1 |
| MV_Schw | A | 1255 | 35   | 0  |                    | 1 |
| MV_Schw | A | 1256 | 78   | 1  |                    | 1 |
| MV_Schw | C | 1257 | 362  | 8  |                    | 1 |
| MV_Schw | T | 1258 | 58   | 0  | 0.953489044526869  |   |

|         |   |      |      |    |                      |
|---------|---|------|------|----|----------------------|
| MV_Schw | C | 1259 | 93   | 0  | 0.498091317793217    |
| MV_Schw | G | 1260 | 203  | 1  | 0.44280652126772     |
| MV_Schw | G | 1261 | 328  | 1  | 0.063398926233283    |
| MV_Schw | T | 1262 | 225  | 0  | 0.0222273767865594   |
| MV_Schw | A | 1263 | 50   | 0  | 0.950262622850522    |
| MV_Schw | T | 1264 | 39   | 0  | 1                    |
| MV_Schw | C | 1265 | 58   | 1  | 1                    |
| MV_Schw | A | 1266 | 4    | 0  | 1                    |
| MV_Schw | C | 1267 | 297  | 1  | 0.109592982915171    |
| MV_Schw | T | 1268 | 43   | 1  | 1                    |
| MV_Schw | G | 1269 | 475  | 6  | 0.641186461810141    |
| MV_Schw | C | 1270 | 151  | 3  | 1                    |
| MV_Schw | C | 1271 | 1550 | 14 | 0.00044302319835552  |
| MV_Schw | G | 1272 | 165  | 2  | 1                    |
| MV_Schw | A | 1273 | 103  | 2  | 1                    |
| MV_Schw | G | 1274 | 176  | 1  | 0.34703042205032     |
| MV_Schw | G | 1275 | 105  | 1  | 0.944944073306986    |
| MV_Schw | A | 1276 | 29   | 1  | 1                    |
| MV_Schw | T | 1277 | 213  | 3  | 1                    |
| MV_Schw | G | 1278 | 215  | 0  | 0.0320573639632113   |
| MV_Schw | C | 1279 | 401  | 4  | 0.37877131423274     |
| MV_Schw | A | 1280 | 167  | 1  | 0.788293646497135    |
| MV_Schw | A | 1281 | 186  | 1  | 0.655978174231774    |
| MV_Schw | G | 1282 | 2058 | 19 | 2.49296123931229e-05 |
| MV_Schw | G | 1283 | 151  | 1  | 0.553693656798976    |
| MV_Schw | C | 1284 | 599  | 9  | 0.752513969443182    |
| MV_Schw | T | 1285 | 143  | 1  | 0.542465567021569    |
| MV_Schw | T | 1286 | 56   | 0  | 0.950262622850522    |
| MV_Schw | G | 1287 | 316  | 3  | 0.34589959211708     |
| MV_Schw | T | 1288 | 72   | 0  | 0.791667533131283    |
| MV_Schw | T | 1289 | 328  | 6  | 1                    |
| MV_Schw | T | 1290 | 76   | 0  | 0.638894311640422    |
| MV_Schw | C | 1291 | 399  | 3  | 0.121990068397456    |
| MV_Schw | A | 1292 | 120  | 1  | 1                    |
| MV_Schw | G | 1293 | 1254 | 5  | 3.44021009317048e-08 |
| MV_Schw | A | 1294 | 159  | 1  | 0.437783686960654    |

|         |   |      |     |    |                    |
|---------|---|------|-----|----|--------------------|
| MV_Schw | G | 1295 | 370 | 5  | 0.737900226779511  |
| MV_Schw | A | 1296 | 99  | 1  | 1                  |
| MV_Schw | T | 1297 | 436 | 5  | 0.42458526175556   |
| MV_Schw | T | 1298 | 78  | 3  | 0.863499923807603  |
| MV_Schw | G | 1299 | 465 | 7  | 1                  |
| MV_Schw | C | 1300 | 198 | 1  | 0.2148607170878    |
| MV_Schw | A | 1301 | 180 | 3  | 1                  |
| MV_Schw | A | 1302 | 484 | 7  | 0.752394317790241  |
| MV_Schw | T | 1303 | 109 | 3  | 1                  |
| MV_Schw | G | 1304 | 85  | 1  | 1                  |
| MV_Schw | C | 1305 | 64  | 0  | 0.789229943133706  |
| MV_Schw | A | 1306 | 89  | 1  | 1                  |
| MV_Schw | T | 1307 | 91  | 1  | 1                  |
| MV_Schw | A | 1308 | 41  | 1  | 1                  |
| MV_Schw | C | 1309 | 78  | 1  | 1                  |
| MV_Schw | T | 1310 | 25  | 0  | 1                  |
| MV_Schw | A | 1311 | 14  | 0  | 1                  |
| MV_Schw | C | 1312 | 353 | 8  | 1                  |
| MV_Schw | T | 1313 | 116 | 2  | 1                  |
| MV_Schw | G | 1314 | 151 | 5  | 0.60889328543512   |
| MV_Schw | A | 1315 | 19  | 0  | 1                  |
| MV_Schw | G | 1316 | 409 | 5  | 0.78470776546672   |
| MV_Schw | G | 1317 | 285 | 0  | 0.0057053996200859 |
| MV_Schw | A | 1318 | 58  | 1  | 1                  |
| MV_Schw | C | 1319 | 229 | 1  | 0.365713575863648  |
| MV_Schw | A | 1320 | 33  | 1  | 0.822598489333375  |
| MV_Schw | A | 1321 | 35  | 0  | 1                  |
| MV_Schw | G | 1322 | 510 | 7  | 0.66330042087892   |
| MV_Schw | A | 1323 | 116 | 1  | 0.789229943133706  |
| MV_Schw | T | 1324 | 68  | 0  | 0.789229943133706  |
| MV_Schw | C | 1325 | 81  | 1  | 1                  |
| MV_Schw | A | 1326 | 167 | 3  | 1                  |
| MV_Schw | G | 1327 | 471 | 13 | 0.65158773158174   |
| MV_Schw | T | 1328 | 95  | 1  | 1                  |
| MV_Schw | A | 1329 | 176 | 9  | 0.0263686814356238 |
| MV_Schw | G | 1330 | 322 | 3  | 0.34703042205032   |

|         |   |      |      |    |                    |   |
|---------|---|------|------|----|--------------------|---|
| MV_Schw | A | 1331 | 289  | 5  |                    | 1 |
| MV_Schw | G | 1332 | 455  | 11 |                    | 1 |
| MV_Schw | C | 1333 | 333  | 11 | 0.496192834000483  |   |
| MV_Schw | G | 1334 | 242  | 7  | 0.789229943133706  |   |
| MV_Schw | G | 1335 | 1698 | 37 |                    | 1 |
| MV_Schw | T | 1336 | 87   | 1  |                    | 1 |
| MV_Schw | T | 1337 | 548  | 7  | 0.462734918202348  |   |
| MV_Schw | G | 1338 | 434  | 8  |                    | 1 |
| MV_Schw | G | 1339 | 233  | 3  | 0.88950624150852   |   |
| MV_Schw | A | 1340 | 147  | 3  |                    | 1 |
| MV_Schw | C | 1341 | 1328 | 24 |                    | 1 |
| MV_Schw | C | 1342 | 190  | 1  | 0.282444566862733  |   |
| MV_Schw | C | 1343 | 384  | 3  | 0.154901578193624  |   |
| MV_Schw | A | 1344 | 300  | 3  | 0.751501025978229  |   |
| MV_Schw | G | 1345 | 1289 | 19 | 0.361375949743061  |   |
| MV_Schw | A | 1346 | 1039 | 11 | 0.0529876019641143 |   |
| MV_Schw | C | 1347 | 605  | 9  | 0.892700718531951  |   |
| MV_Schw | A | 1348 | 66   | 1  |                    | 1 |
| MV_Schw | A | 1349 | 68   | 2  |                    | 1 |
| MV_Schw | G | 1350 | 698  | 7  | 0.170580290472318  |   |
| MV_Schw | C | 1351 | 357  | 4  | 0.613731229150989  |   |
| MV_Schw | C | 1352 | 329  | 7  |                    | 1 |
| MV_Schw | C | 1353 | 289  | 4  |                    | 1 |
| MV_Schw | A | 1354 | 347  | 4  | 0.691829352390927  |   |
| MV_Schw | A | 1355 | 242  | 1  | 0.299148652241935  |   |
| MV_Schw | G | 1356 | 527  | 9  |                    | 1 |
| MV_Schw | T | 1357 | 85   | 1  |                    | 1 |
| MV_Schw | A | 1358 | 95   | 0  | 0.499662168427985  |   |
| MV_Schw | T | 1359 | 6    | 0  |                    | 1 |
| MV_Schw | C | 1360 | 238  | 1  | 0.0899009831500995 |   |
| MV_Schw | A | 1361 | 448  | 3  | 0.0435098404838992 |   |
| MV_Schw | T | 1362 | 151  | 2  |                    | 1 |
| MV_Schw | T | 1363 | 89   | 0  | 0.497615650989996  |   |
| MV_Schw | T | 1364 | 107  | 2  |                    | 1 |
| MV_Schw | C | 1365 | 70   | 0  | 0.789229943133706  |   |
| MV_Schw | T | 1366 | 112  | 1  |                    | 1 |

|         |   |      |      |    |                      |   |
|---------|---|------|------|----|----------------------|---|
| MV_Schw | A | 1367 | 254  | 4  |                      | 1 |
| MV_Schw | C | 1368 | 459  | 9  |                      | 1 |
| MV_Schw | A | 1369 | 33   | 1  |                      | 1 |
| MV_Schw | C | 1370 | 452  | 5  | 0.35554222034638     |   |
| MV_Schw | G | 1371 | 89   | 2  |                      | 1 |
| MV_Schw | G | 1372 | 50   | 0  | 0.950262622850522    |   |
| MV_Schw | T | 1373 | 149  | 2  |                      | 1 |
| MV_Schw | G | 1374 | 107  | 3  |                      | 1 |
| MV_Schw | A | 1375 | 444  | 5  | 0.426789350155389    |   |
| MV_Schw | T | 1376 | 95   | 1  |                      | 1 |
| MV_Schw | C | 1377 | 306  | 4  | 0.863499923807603    |   |
| MV_Schw | A | 1378 | 74   | 1  |                      | 1 |
| MV_Schw | A | 1379 | 29   | 0  |                      | 1 |
| MV_Schw | A | 1380 | 33   | 0  |                      | 1 |
| MV_Schw | G | 1381 | 1638 | 14 | 0.000100596773812726 |   |
| MV_Schw | T | 1382 | 240  | 1  | 0.298485329352986    |   |
| MV_Schw | G | 1383 | 45   | 1  |                      | 1 |
| MV_Schw | A | 1384 | 12   | 0  |                      | 1 |
| MV_Schw | G | 1385 | 413  | 1  | 0.00732896895426522  |   |
| MV_Schw | A | 1386 | 105  | 3  |                      | 1 |
| MV_Schw | A | 1387 | 89   | 1  |                      | 1 |
| MV_Schw | T | 1388 | 66   | 0  | 0.789229943133706    |   |
| MV_Schw | G | 1389 | 649  | 5  | 0.0228821009043291   |   |
| MV_Schw | A | 1390 | 23   | 1  |                      | 1 |
| MV_Schw | G | 1391 | 798  | 13 | 0.950262622850522    |   |
| MV_Schw | C | 1392 | 277  | 6  |                      | 1 |
| MV_Schw | T | 1393 | 110  | 3  |                      | 1 |
| MV_Schw | A | 1394 | 60   | 1  |                      | 1 |
| MV_Schw | C | 1395 | 2390 | 15 | 4.05683077436258e-10 |   |
| MV_Schw | C | 1396 | 760  | 3  | 0.00025637403808524  |   |
| MV_Schw | G | 1397 | 318  | 5  |                      | 1 |
| MV_Schw | A | 1398 | 120  | 0  | 0.297586725038221    |   |
| MV_Schw | G | 1399 | 700  | 15 |                      | 1 |
| MV_Schw | A | 1400 | 161  | 3  |                      | 1 |
| MV_Schw | T | 1401 | 328  | 5  | 0.95513164991589     |   |
| MV_Schw | T | 1402 | 895  | 6  | 0.00126888474341389  |   |



|         |   |      |      |    |                      |   |
|---------|---|------|------|----|----------------------|---|
| MV_Schw | G | 1403 | 200  | 3  |                      | 1 |
| MV_Schw | G | 1404 | 161  | 1  | 0.78470776546672     |   |
| MV_Schw | G | 1405 | 473  | 6  | 0.641186461810141    |   |
| MV_Schw | G | 1406 | 1341 | 23 | 0.824020051690401    |   |
| MV_Schw | G | 1407 | 341  | 3  | 0.482818471264445    |   |
| MV_Schw | G | 1408 | 289  | 6  |                      | 1 |
| MV_Schw | C | 1409 | 428  | 4  | 0.27434205540177     |   |
| MV_Schw | A | 1410 | 515  | 5  | 0.296449891538542    |   |
| MV_Schw | A | 1411 | 76   | 1  |                      | 1 |
| MV_Schw | G | 1412 | 3870 | 47 | 4.90654890450257e-05 |   |
| MV_Schw | G | 1413 | 1661 | 29 | 0.804012574266476    |   |
| MV_Schw | A | 1414 | 202  | 2  | 0.822598489333375    |   |
| MV_Schw | A | 1415 | 114  | 3  | 0.953489044526869    |   |
| MV_Schw | G | 1416 | 634  | 9  | 0.619556855087002    |   |
| MV_Schw | A | 1417 | 130  | 2  |                      | 1 |
| MV_Schw | T | 1418 | 415  | 5  | 0.78661714180561     |   |
| MV_Schw | A | 1419 | 322  | 5  |                      | 1 |
| MV_Schw | G | 1420 | 1715 | 30 | 0.87758702541755     |   |
| MV_Schw | G | 1421 | 219  | 4  |                      | 1 |
| MV_Schw | A | 1422 | 50   | 1  |                      | 1 |
| MV_Schw | G | 1423 | 591  | 17 | 0.44280652126772     |   |
| MV_Schw | G | 1424 | 589  | 9  | 0.950262622850522    |   |
| MV_Schw | G | 1425 | 3052 | 37 | 0.000536000093522229 |   |
| MV_Schw | T | 1426 | 23   | 2  | 0.296710762771661    |   |
| MV_Schw | C | 1427 | 1171 | 16 | 0.284645589750564    |   |
| MV_Schw | A | 1428 | 610  | 10 |                      | 1 |
| MV_Schw | A | 1429 | 669  | 9  | 0.490712565215331    |   |
| MV_Schw | A | 1430 | 837  | 15 |                      | 1 |
| MV_Schw | C | 1431 | 907  | 15 | 0.813457243243208    |   |
| MV_Schw | A | 1432 | 54   | 1  |                      | 1 |
| MV_Schw | G | 1433 | 169  | 8  | 0.109336969642784    |   |
| MV_Schw | A | 1434 | 50   | 1  |                      | 1 |
| MV_Schw | G | 1435 | 2056 | 34 | 0.551820327843223    |   |
| MV_Schw | T | 1436 | 240  | 1  | 0.298485329352986    |   |
| MV_Schw | C | 1437 | 1826 | 22 | 0.0158490317190943   |   |
| MV_Schw | G | 1438 | 298  | 4  | 0.950262622850522    |   |

|         |   |      |      |    |                   |   |
|---------|---|------|------|----|-------------------|---|
| MV_Schw | A | 1439 | 76   | 2  |                   | 1 |
| MV_Schw | G | 1440 | 2897 | 65 | 0.991517221373143 |   |
| MV_Schw | G | 1441 | 502  | 11 |                   | 1 |
| MV_Schw | A | 1442 | 118  | 1  | 0.789229943133706 |   |
| MV_Schw | G | 1443 | 364  | 9  | 0.986363032184908 |   |
| MV_Schw | A | 1444 | 79   | 2  |                   | 1 |
| MV_Schw | A | 1445 | 157  | 5  | 0.634563222137982 |   |
| MV_Schw | G | 1446 | 3405 | 72 |                   | 1 |
| MV_Schw | C | 1447 | 746  | 12 | 0.88950624150852  |   |
| MV_Schw | C | 1448 | 771  | 15 |                   | 1 |
| MV_Schw | A | 1449 | 184  | 1  | 0.653463094391213 |   |
| MV_Schw | G | 1450 | 2818 | 63 |                   | 1 |
| MV_Schw | G | 1451 | 727  | 16 |                   | 1 |
| MV_Schw | G | 1452 | 1262 | 28 |                   | 1 |
| MV_Schw | A | 1453 | 60   | 1  |                   | 1 |
| MV_Schw | G | 1454 | 1225 | 32 | 0.500728647414438 |   |
| MV_Schw | A | 1455 | 78   | 1  |                   | 1 |
| MV_Schw | G | 1456 | 1157 | 20 | 0.950262622850522 |   |
| MV_Schw | C | 1457 | 628  | 20 | 0.197110025094196 |   |
| MV_Schw | T | 1458 | 393  | 11 | 0.840983359503437 |   |
| MV_Schw | A | 1459 | 186  | 2  | 0.948552432136014 |   |
| MV_Schw | C | 1460 | 1174 | 25 |                   | 1 |
| MV_Schw | A | 1461 | 855  | 11 | 0.35707797494517  |   |
| MV_Schw | G | 1462 | 4134 | 77 | 0.794204819559428 |   |
| MV_Schw | A | 1463 | 202  | 5  |                   | 1 |
| MV_Schw | G | 1464 | 1403 | 34 | 0.795776776758852 |   |
| MV_Schw | A | 1465 | 370  | 4  | 0.525839681355544 |   |
| MV_Schw | A | 1466 | 165  | 3  |                   | 1 |
| MV_Schw | A | 1467 | 609  | 16 | 0.78354985902497  |   |
| MV_Schw | C | 1468 | 2182 | 36 | 0.500212938980029 |   |
| MV_Schw | C | 1469 | 1184 | 21 | 0.950262622850522 |   |
| MV_Schw | G | 1470 | 295  | 3  | 0.747277641572764 |   |
| MV_Schw | G | 1471 | 1256 | 16 | 0.121801114556321 |   |
| MV_Schw | G | 1472 | 1422 | 27 |                   | 1 |
| MV_Schw | C | 1473 | 293  | 8  | 0.859810030547618 |   |
| MV_Schw | C | 1474 | 145  | 3  |                   | 1 |

|         |   |      |      |    |                      |
|---------|---|------|------|----|----------------------|
| MV_Schw | C | 1475 | 1252 | 21 | 0.788529961779972    |
| MV_Schw | A | 1476 | 459  | 7  | 0.88950624150852     |
| MV_Schw | G | 1477 | 979  | 21 | 1                    |
| MV_Schw | C | 1478 | 320  | 4  | 0.870477463111003    |
| MV_Schw | A | 1479 | 103  | 1  | 1                    |
| MV_Schw | G | 1480 | 1033 | 21 | 1                    |
| MV_Schw | A | 1481 | 165  | 3  | 1                    |
| MV_Schw | G | 1482 | 1182 | 26 | 1                    |
| MV_Schw | C | 1483 | 200  | 4  | 1                    |
| MV_Schw | A | 1484 | 223  | 3  | 1                    |
| MV_Schw | A | 1485 | 124  | 3  | 1                    |
| MV_Schw | G | 1486 | 630  | 12 | 1                    |
| MV_Schw | T | 1487 | 343  | 5  | 1                    |
| MV_Schw | G | 1488 | 188  | 2  | 0.950262622850522    |
| MV_Schw | A | 1489 | 25   | 1  | 1                    |
| MV_Schw | T | 1490 | 258  | 3  | 1                    |
| MV_Schw | G | 1491 | 1719 | 15 | 6.07250883517013e-05 |
| MV_Schw | C | 1492 | 430  | 3  | 0.152199178790049    |
| MV_Schw | G | 1493 | 343  | 1  | 0.0340037011728573   |
| MV_Schw | A | 1494 | 45   | 1  | 1                    |
| MV_Schw | G | 1495 | 1114 | 11 | 0.0111350404952786   |
| MV_Schw | A | 1496 | 297  | 3  | 0.747415194406969    |
| MV_Schw | G | 1497 | 370  | 2  | 0.0685834980642483   |
| MV_Schw | C | 1498 | 83   | 1  | 1                    |
| MV_Schw | T | 1499 | 374  | 2  | 0.0693869478916248   |
| MV_Schw | G | 1500 | 742  | 2  | 1.30740697600815e-05 |
| MV_Schw | C | 1501 | 547  | 5  | 0.205562273436928    |
| MV_Schw | C | 1502 | 1864 | 21 | 0.00344109870565157  |
| MV_Schw | C | 1503 | 360  | 7  | 1                    |
| MV_Schw | A | 1504 | 318  | 5  | 1                    |
| MV_Schw | T | 1505 | 76   | 1  | 1                    |
| MV_Schw | C | 1506 | 587  | 6  | 0.235036315889652    |
| MV_Schw | T | 1507 | 465  | 3  | 0.0975104748468945   |
| MV_Schw | T | 1508 | 413  | 6  | 0.950262622850522    |
| MV_Schw | C | 1509 | 372  | 1  | 0.00357914851038033  |
| MV_Schw | C | 1510 | 2209 | 33 | 0.150275484411855    |

|         |   |      |      |    |                     |
|---------|---|------|------|----|---------------------|
| MV_Schw | A | 1511 | 543  | 3  | 0.00601756867980689 |
| MV_Schw | A | 1512 | 407  | 7  | 1                   |
| MV_Schw | C | 1513 | 2021 | 27 | 0.0532560612129227  |
| MV_Schw | C | 1514 | 1031 | 15 | 0.449295143732283   |
| MV_Schw | G | 1515 | 273  | 3  | 0.944879389258477   |
| MV_Schw | G | 1516 | 688  | 13 | 1                   |
| MV_Schw | C | 1517 | 3081 | 47 | 0.103118931867884   |
| MV_Schw | A | 1518 | 211  | 7  | 0.752394317790241   |
| MV_Schw | C | 1519 | 364  | 2  | 0.0919716715734722  |
| MV_Schw | A | 1520 | 79   | 1  | 1                   |
| MV_Schw | C | 1521 | 60   | 1  | 1                   |
| MV_Schw | C | 1522 | 79   | 1  | 1                   |
| MV_Schw | C | 1523 | 209  | 3  | 1                   |
| MV_Schw | C | 1524 | 488  | 10 | 1                   |
| MV_Schw | T | 1525 | 578  | 9  | 1                   |
| MV_Schw | A | 1526 | 159  | 2  | 1                   |
| MV_Schw | G | 1527 | 297  | 9  | 0.774323460824027   |
| MV_Schw | A | 1528 | 68   | 1  | 1                   |
| MV_Schw | C | 1529 | 486  | 10 | 1                   |
| MV_Schw | A | 1530 | 126  | 1  | 1                   |
| MV_Schw | T | 1531 | 70   | 2  | 1                   |
| MV_Schw | T | 1532 | 473  | 7  | 0.957721317456694   |
| MV_Schw | G | 1533 | 215  | 3  | 1                   |
| MV_Schw | A | 1534 | 215  | 3  | 0.957721317456694   |
| MV_Schw | C | 1535 | 1556 | 30 | 1                   |
| MV_Schw | A | 1536 | 306  | 9  | 0.789229943133706   |
| MV_Schw | C | 1537 | 440  | 11 | 0.950262622850522   |
| MV_Schw | T | 1538 | 16   | 1  | 0.950262622850522   |
| MV_Schw | G | 1539 | 207  | 7  | 0.482213389565027   |
| MV_Schw | C | 1540 | 891  | 20 | 1                   |
| MV_Schw | A | 1541 | 521  | 14 | 0.789229943133706   |
| MV_Schw | A | 1542 | 370  | 11 | 0.747390316041078   |
| MV_Schw | C | 1543 | 707  | 23 | 0.100910165243047   |
| MV_Schw | G | 1544 | 331  | 12 | 0.191903929734333   |
| MV_Schw | G | 1545 | 149  | 4  | 1                   |
| MV_Schw | A | 1546 | 103  | 5  | 0.158069451340348   |

|         |   |      |      |    |                      |
|---------|---|------|------|----|----------------------|
| MV_Schw | G | 1547 | 2225 | 71 | 0.000594041282609694 |
| MV_Schw | T | 1548 | 39   | 2  | 0.560243889454362    |
| MV_Schw | C | 1549 | 116  | 1  | 1                    |
| MV_Schw | C | 1550 | 521  | 9  | 1                    |
| MV_Schw | A | 1551 | 205  | 4  | 1                    |
| MV_Schw | G | 1552 | 3095 | 99 | 2.26421069754810e-05 |
| MV_Schw | C | 1553 | 1027 | 25 | 0.944879389258477    |
| MV_Schw | C | 1554 | 285  | 7  | 1                    |
| MV_Schw | A | 1555 | 124  | 3  | 1                    |
| MV_Schw | A | 1556 | 31   | 0  | 1                    |
| MV_Schw | G | 1557 | 1275 | 55 | 2.12328296369738e-07 |
| MV_Schw | A | 1558 | 64   | 1  | 1                    |
| MV_Schw | T | 1559 | 66   | 2  | 1                    |
| MV_Schw | C | 1560 | 112  | 7  | 0.0469203899661715   |
| MV_Schw | C | 1561 | 333  | 6  | 1                    |
| MV_Schw | G | 1562 | 1944 | 49 | 0.456916167414978    |
| MV_Schw | C | 1563 | 1452 | 52 | 0.000243535043905277 |
| MV_Schw | A | 1564 | 1178 | 34 | 0.194766393590132    |
| MV_Schw | G | 1565 | 816  | 11 | 0.516074534558187    |
| MV_Schw | G | 1566 | 83   | 1  | 1                    |
| MV_Schw | A | 1567 | 8    | 0  | 1                    |
| MV_Schw | C | 1568 | 140  | 3  | 1                    |
| MV_Schw | A | 1569 | 14   | 1  | 0.944879389258477    |
| MV_Schw | G | 1570 | 700  | 12 | 1                    |
| MV_Schw | T | 1571 | 91   | 0  | 0.497615650989996    |
| MV_Schw | C | 1572 | 562  | 4  | 0.035915992343949    |
| MV_Schw | G | 1573 | 2116 | 39 | 1                    |
| MV_Schw | A | 1574 | 99   | 1  | 0.944879389258477    |
| MV_Schw | A | 1575 | 994  | 26 | 0.632968068765344    |
| MV_Schw | G | 1576 | 992  | 29 | 0.19071719426311     |
| MV_Schw | G | 1577 | 287  | 2  | 0.298485329352986    |
| MV_Schw | T | 1578 | 35   | 1  | 1                    |
| MV_Schw | C | 1579 | 120  | 1  | 1                    |
| MV_Schw | A | 1580 | 1424 | 29 | 1                    |
| MV_Schw | G | 1581 | 1822 | 43 | 0.89574764422965     |
| MV_Schw | C | 1582 | 1089 | 13 | 0.144729111493106    |

|         |   |      |      |    |                      |   |
|---------|---|------|------|----|----------------------|---|
| MV_Schw | T | 1583 | 1318 | 8  | 6.94161049587008e-06 | 1 |
| MV_Schw | G | 1584 | 411  | 7  |                      | 1 |
| MV_Schw | A | 1585 | 23   | 2  | 0.296710762771661    | 1 |
| MV_Schw | C | 1586 | 543  | 10 |                      | 1 |
| MV_Schw | G | 1587 | 610  | 13 |                      | 1 |
| MV_Schw | C | 1588 | 203  | 1  | 0.44280652126772     | 1 |
| MV_Schw | C | 1589 | 211  | 2  | 0.73453580589799     | 1 |
| MV_Schw | C | 1590 | 45   | 1  |                      | 1 |
| MV_Schw | T | 1591 | 103  | 3  |                      | 1 |
| MV_Schw | G | 1592 | 298  | 3  | 0.506554058853276    | 1 |
| MV_Schw | C | 1593 | 87   | 0  | 0.653463094391213    | 1 |
| MV_Schw | T | 1594 | 85   | 1  |                      | 1 |
| MV_Schw | T | 1595 | 45   | 0  |                      | 1 |
| MV_Schw | A | 1596 | 29   | 0  |                      | 1 |
| MV_Schw | G | 1597 | 33   | 0  |                      | 1 |
| MV_Schw | G | 1598 | 35   | 1  | 0.863499923807603    | 1 |
| MV_Schw | C | 1599 | 169  | 1  | 0.341186273229673    | 1 |
| MV_Schw | T | 1600 | 17   | 1  | 0.983041048229953    | 1 |
| MV_Schw | G | 1601 | 43   | 0  |                      | 1 |
| MV_Schw | C | 1602 | 83   | 3  | 0.897349285586955    | 1 |
| MV_Schw | A | 1603 | 95   | 3  |                      | 1 |
| MV_Schw | A | 1604 | 79   | 0  | 0.639207655977387    | 1 |
| MV_Schw | G | 1605 | 161  | 8  | 0.0946648171868323   | 1 |
| MV_Schw | C | 1606 | 17   | 0  |                      | 1 |
| MV_Schw | C | 1607 | 52   | 1  |                      | 1 |
| MV_Schw | A | 1608 | 21   | 0  |                      | 1 |
| MV_Schw | T | 1609 | 35   | 1  | 0.863499923807603    | 1 |
| MV_Schw | G | 1610 | 64   | 1  |                      | 1 |
| MV_Schw | G | 1611 | 116  | 1  | 0.789229943133706    | 1 |
| MV_Schw | C | 1612 | 1450 | 25 | 0.93081617452657     | 1 |
| MV_Schw | A | 1613 | 27   | 1  | 0.752394317790241    | 1 |
| MV_Schw | G | 1614 | 223  | 5  |                      | 1 |
| MV_Schw | G | 1615 | 83   | 1  |                      | 1 |
| MV_Schw | A | 1616 | 21   | 0  |                      | 1 |
| MV_Schw | A | 1617 | 54   | 0  | 0.950262622850522    | 1 |
| MV_Schw | T | 1618 | 58   | 1  |                      | 1 |

|         |   |      |      |    |                      |   |
|---------|---|------|------|----|----------------------|---|
| MV_Schw | C | 1619 | 310  | 7  |                      | 1 |
| MV_Schw | T | 1620 | 31   | 1  | 0.791667533131283    |   |
| MV_Schw | C | 1621 | 405  | 7  |                      | 1 |
| MV_Schw | G | 1622 | 1407 | 31 |                      | 1 |
| MV_Schw | G | 1623 | 1182 | 21 |                      | 1 |
| MV_Schw | A | 1624 | 93   | 1  |                      | 1 |
| MV_Schw | A | 1625 | 200  | 2  | 0.822598489333375    |   |
| MV_Schw | G | 1626 | 347  | 6  |                      | 1 |
| MV_Schw | A | 1627 | 72   | 2  |                      | 1 |
| MV_Schw | A | 1628 | 43   | 1  | 0.950262622850522    |   |
| MV_Schw | C | 1629 | 733  | 18 | 0.950262622850522    |   |
| MV_Schw | A | 1630 | 64   | 1  |                      | 1 |
| MV_Schw | A | 1631 | 23   | 0  |                      | 1 |
| MV_Schw | G | 1632 | 595  | 11 |                      | 1 |
| MV_Schw | G | 1633 | 215  | 3  | 0.957721317456694    |   |
| MV_Schw | C | 1634 | 661  | 7  | 0.239446226094413    |   |
| MV_Schw | T | 1635 | 74   | 0  | 0.795198078226602    |   |
| MV_Schw | C | 1636 | 777  | 5  | 0.00202386221156952  |   |
| MV_Schw | A | 1637 | 207  | 6  | 0.863499923807603    |   |
| MV_Schw | G | 1638 | 793  | 10 | 0.314092448058486    |   |
| MV_Schw | A | 1639 | 213  | 1  | 0.161503851613234    |   |
| MV_Schw | C | 1640 | 1438 | 15 | 0.00902074032804496  |   |
| MV_Schw | A | 1641 | 85   | 2  |                      | 1 |
| MV_Schw | C | 1642 | 779  | 4  | 0.000549511793907958 |   |
| MV_Schw | G | 1643 | 944  | 9  | 0.0202371512205466   |   |
| MV_Schw | G | 1644 | 304  | 6  |                      | 1 |
| MV_Schw | A | 1645 | 192  | 2  | 0.822598489333375    |   |
| MV_Schw | C | 1646 | 502  | 5  | 0.334609302718848    |   |
| MV_Schw | A | 1647 | 39   | 2  | 0.560243889454362    |   |
| MV_Schw | C | 1648 | 138  | 1  | 0.673422966374487    |   |
| MV_Schw | C | 1649 | 56   | 2  | 0.968890372475178    |   |
| MV_Schw | C | 1650 | 81   | 0  | 0.641186461810141    |   |
| MV_Schw | C | 1651 | 661  | 5  | 0.0176695265173447   |   |
| MV_Schw | T | 1652 | 149  | 1  | 0.550155392537109    |   |
| MV_Schw | A | 1653 | 99   | 1  | 0.944879389258477    |   |
| MV_Schw | T | 1654 | 29   | 0  |                      | 1 |

|         |   |      |     |    |                   |   |
|---------|---|------|-----|----|-------------------|---|
| MV_Schw | A | 1655 | 19  | 1  |                   | 1 |
| MV_Schw | G | 1656 | 39  | 0  |                   | 1 |
| MV_Schw | T | 1657 | 12  | 0  |                   | 1 |
| MV_Schw | G | 1658 | 130 | 2  |                   | 1 |
| MV_Schw | T | 1659 | 41  | 0  |                   | 1 |
| MV_Schw | A | 1660 | 39  | 0  |                   | 1 |
| MV_Schw | C | 1661 | 688 | 12 |                   | 1 |
| MV_Schw | A | 1662 | 41  | 0  |                   | 1 |
| MV_Schw | A | 1663 | 23  | 1  |                   | 1 |
| MV_Schw | T | 1664 | 83  | 0  | 0.645428736569362 |   |
| MV_Schw | G | 1665 | 37  | 0  |                   | 1 |
| MV_Schw | A | 1666 | 68  | 0  | 0.789229943133706 |   |
| MV_Schw | C | 1667 | 459 | 6  | 0.717344502003652 |   |
| MV_Schw | A | 1668 | 223 | 7  | 0.788293646497135 |   |
| MV_Schw | G | 1669 | 453 | 5  | 0.355607115956135 |   |
| MV_Schw | A | 1670 | 27  | 2  | 0.355295708921217 |   |
| MV_Schw | A | 1671 | 21  | 1  |                   | 1 |
| MV_Schw | A | 1672 | 29  | 1  |                   | 1 |
| MV_Schw | T | 1673 | 50  | 0  | 0.950262622850522 |   |
| MV_Schw | C | 1674 | 186 | 3  |                   | 1 |
| MV_Schw | T | 1675 | 19  | 0  |                   | 1 |
| MV_Schw | T | 1676 | 109 | 0  | 0.381672248067152 |   |
| MV_Schw | C | 1677 | 438 | 8  |                   | 1 |
| MV_Schw | T | 1678 | 25  | 1  |                   | 1 |
| MV_Schw | A | 1679 | 14  | 0  |                   | 1 |
| MV_Schw | G | 1680 | 72  | 0  | 0.791667533131283 |   |
| MV_Schw | A | 1681 | 2   | 1  | 0.491835918445353 |   |
| MV_Schw | C | 1682 | 54  | 1  |                   | 1 |
| MV_Schw | T | 1683 | 12  | 0  |                   | 1 |
| MV_Schw | A | 1684 | 10  | 1  | 0.822598489333375 |   |
| MV_Schw | G | 1685 | 264 | 4  |                   | 1 |
| MV_Schw | G | 1686 | 21  | 0  |                   | 1 |
| MV_Schw | T | 1687 | 17  | 1  | 0.983041048229953 |   |
| MV_Schw | G | 1688 | 105 | 1  |                   | 1 |
| MV_Schw | C | 1689 | 48  | 1  |                   | 1 |
| MV_Schw | G | 1690 | 184 | 3  |                   | 1 |



|         |   |      |     |    |                      |
|---------|---|------|-----|----|----------------------|
| MV_Schw | A | 1691 | 33  | 3  | 0.197209929577240    |
| MV_Schw | G | 1692 | 240 | 7  | 0.91629883023733     |
| MV_Schw | A | 1693 | 39  | 1  | 0.9314909603024      |
| MV_Schw | G | 1694 | 41  | 0  | 1                    |
| MV_Schw | G | 1695 | 134 | 1  | 0.66330042087892     |
| MV_Schw | C | 1696 | 378 | 1  | 0.0191302408693408   |
| MV_Schw | C | 1697 | 83  | 1  | 1                    |
| MV_Schw | G | 1698 | 85  | 0  | 0.648224297390367    |
| MV_Schw | A | 1699 | 72  | 2  | 1                    |
| MV_Schw | G | 1700 | 136 | 1  | 0.983041048229953    |
| MV_Schw | G | 1701 | 89  | 3  | 0.944879389258477    |
| MV_Schw | G | 1702 | 244 | 3  | 0.996771597822493    |
| MV_Schw | C | 1703 | 78  | 0  | 0.638894311640422    |
| MV_Schw | C | 1704 | 47  | 0  | 1                    |
| MV_Schw | A | 1705 | 97  | 3  | 1                    |
| MV_Schw | G | 1706 | 343 | 1  | 0.0340037011728573   |
| MV_Schw | A | 1707 | 85  | 0  | 0.648224297390367    |
| MV_Schw | A | 1708 | 225 | 0  | 0.0222273767865594   |
| MV_Schw | C | 1709 | 172 | 1  | 0.342651296301386    |
| MV_Schw | A | 1710 | 6   | 0  | 1                    |
| MV_Schw | A | 1711 | 4   | 0  | 1                    |
| MV_Schw | C | 1712 | 203 | 2  | 0.822598489333375    |
| MV_Schw | A | 1713 | 33  | 1  | 0.822598489333375    |
| MV_Schw | T | 1714 | 21  | 1  | 1                    |
| MV_Schw | C | 1715 | 81  | 1  | 1                    |
| MV_Schw | C | 1716 | 184 | 3  | 1                    |
| MV_Schw | G | 1717 | 219 | 6  | 0.974212843118987    |
| MV_Schw | C | 1718 | 192 | 13 | 0.000558788705942422 |
| MV_Schw | C | 1719 | 917 | 42 | 1.14058422454697e-06 |
| MV_Schw | T | 1720 | 10  | 1  | 0.822598489333375    |
| MV_Schw | A | 1721 | 17  | 1  | 0.528591092326266    |
| MV_Schw | C | 1722 | 14  | 1  | 0.426789350155389    |
| MV_Schw | C | 1723 | 33  | 1  | 1                    |
| MV_Schw | A | 1724 | 62  | 1  | 1                    |
| MV_Schw | T | 1725 | 8   | 1  | 0.789229943133706    |
| MV_Schw | C | 1726 | 16  | 1  | 0.483965165529824    |

|         |   |      |     |    |                      |
|---------|---|------|-----|----|----------------------|
| MV_Schw | C | 1727 | 76  | 8) | 0.000334000793653687 |
| MV_Schw | A | 1728 | 35  | 0  | 1                    |
| MV_Schw | T | 1729 | 8   | 0  | 1                    |
| MV_Schw | C | 1730 | 81  | 4  | 0.305908359426921    |
| MV_Schw | A | 1731 | 33  | 3  | 0.197209929577240    |
| MV_Schw | T | 1732 | 16  | 0  | 1                    |
| MV_Schw | T | 1733 | 10  | 0  | 1                    |
| MV_Schw | G | 1734 | 64  | 2  | 1                    |
| MV_Schw | T | 1735 | 2   | 0  | 1                    |
| MV_Schw | T | 1736 | 4   | 0  | 1                    |
| MV_Schw | A | 1737 | 19  | 0  | 1                    |
| MV_Schw | T | 1738 | 23  | 1  | 1                    |
| MV_Schw | A | 1739 | 233 | 1  | 0.124094801360285    |
| MV_Schw | A | 1740 | 74  | 0  | 0.795198078226602    |
| MV_Schw | A | 1741 | 31  | 0  | 1                    |
| MV_Schw | A | 1742 | 12  | 0  | 1                    |
| MV_Schw | A | 1743 | 10  | 0  | 1                    |
| MV_Schw | A | 1744 | 4   | 0  | 1                    |
| MV_Schw | C | 1745 | 163 | 0  | 0.120796610672436    |
| MV_Schw | T | 1746 | 31  | 1  | 1                    |
| MV_Schw | T | 1747 | 54  | 0  | 0.950262622850522    |
| MV_Schw | A | 1748 | 21  | 0  | 1                    |
| MV_Schw | G | 1749 | 37  | 0  | 1                    |
| MV_Schw | G | 1750 | 41  | 1  | 1                    |
| MV_Schw | A | 1751 | 6   | 0  | 1                    |
| MV_Schw | A | 1752 | 47  | 1  | 1                    |
| MV_Schw | C | 1753 | 79  | 1  | 1                    |
| MV_Schw | C | 1754 | 87  | 1  | 1                    |
| MV_Schw | A | 1755 | 58  | 0  | 0.953489044526869    |
| MV_Schw | G | 1756 | 390 | 6  | 1                    |
| MV_Schw | G | 1757 | 465 | 7  | 0.889815154074766    |
| MV_Schw | T | 1758 | 72  | 1  | 1                    |
| MV_Schw | C | 1759 | 58  | 0  | 0.953489044526869    |
| MV_Schw | C | 1760 | 339 | 5  | 1                    |
| MV_Schw | A | 1761 | 64  | 0  | 0.789229943133706    |
| MV_Schw | C | 1762 | 413 | 19 | 0.00194946041036825  |

|         |   |      |     |    |                      |
|---------|---|------|-----|----|----------------------|
| MV_Schw | A | 1763 | 186 | 2  | 0.948552432136014    |
| MV_Schw | C | 1764 | 490 | 27 | 2.81842081722681e-06 |
| MV_Schw | A | 1765 | 176 | 5  | 1                    |
| MV_Schw | G | 1766 | 174 | 9  | 0.0243252704645297   |
| MV_Schw | C | 1767 | 442 | 11 | 1                    |
| MV_Schw | C | 1768 | 453 | 19 | 0.0143155646037661   |
| MV_Schw | G | 1769 | 351 | 4  | 0.696400797652402    |
| MV_Schw | C | 1770 | 211 | 2  | 0.73453580589799     |
| MV_Schw | C | 1771 | 205 | 3  | 1                    |
| MV_Schw | A | 1772 | 54  | 1  | 1                    |
| MV_Schw | G | 1773 | 155 | 0  | 0.118807954027477    |
| MV_Schw | C | 1774 | 45  | 1  | 1                    |
| MV_Schw | C | 1775 | 35  | 1  | 0.863499923807603    |
| MV_Schw | C | 1776 | 101 | 5  | 0.294418906897392    |
| MV_Schw | A | 1777 | 35  | 1  | 1                    |
| MV_Schw | T | 1778 | 8   | 0  | 1                    |
| MV_Schw | C | 1779 | 281 | 1  | 0.141049492085993    |
| MV_Schw | A | 1780 | 21  | 0  | 1                    |
| MV_Schw | A | 1781 | 35  | 0  | 1                    |
| MV_Schw | C | 1782 | 78  | 1  | 1                    |
| MV_Schw | C | 1783 | 207 | 1  | 0.222002676269896    |
| MV_Schw | A | 1784 | 48  | 1  | 1                    |
| MV_Schw | T | 1785 | 29  | 0  | 1                    |
| MV_Schw | C | 1786 | 19  | 0  | 1                    |
| MV_Schw | C | 1787 | 19  | 1  | 1                    |
| MV_Schw | A | 1788 | 10  | 0  | 1                    |
| MV_Schw | C | 1789 | 23  | 0  | 1                    |
| MV_Schw | T | 1790 | 10  | 0  | 1                    |
| MV_Schw | C | 1791 | 12  | 0  | 1                    |
| MV_Schw | C | 1792 | 81  | 1  | 1                    |
| MV_Schw | C | 1793 | 93  | 3  | 1                    |
| MV_Schw | A | 1794 | 31  | 1  | 0.791667533131283    |
| MV_Schw | C | 1795 | 29  | 0  | 1                    |
| MV_Schw | G | 1796 | 35  | 0  | 1                    |
| MV_Schw | A | 1797 | 19  | 0  | 1                    |
| MV_Schw | T | 1798 | 10  | 0  | 1                    |

|         |   |      |     |   |                   |   |
|---------|---|------|-----|---|-------------------|---|
| MV_Schw | T | 1799 | 8   | 0 |                   | 1 |
| MV_Schw | G | 1800 | 16  | 1 | 0.950262622850522 |   |
| MV_Schw | G | 1801 | 17  | 1 | 0.983041048229953 |   |
| MV_Schw | A | 1802 | 23  | 0 |                   | 1 |
| MV_Schw | G | 1803 | 275 | 5 |                   | 1 |
| MV_Schw | C | 1804 | 12  | 0 |                   | 1 |
| MV_Schw | C | 1805 | 35  | 0 |                   | 1 |
| MV_Schw | A | 1806 | 12  | 1 | 0.88950624150852  |   |
| MV_Schw | A | 1807 | 4   | 0 |                   | 1 |
| MV_Schw | T | 1808 | 130 | 1 | 0.983041048229953 |   |
| MV_Schw | G | 1809 | 31  | 1 |                   | 1 |
| MV_Schw | G | 1810 | 29  | 0 |                   | 1 |
| MV_Schw | C | 1811 | 99  | 3 |                   | 1 |
| MV_Schw | A | 1812 | 83  | 1 |                   | 1 |
| MV_Schw | G | 1813 | 266 | 3 | 0.686252029850593 |   |
| MV_Schw | A | 1814 | 6   | 0 |                   | 1 |
| MV_Schw | A | 1815 | 116 | 3 |                   | 1 |
| MV_Schw | G | 1816 | 99  | 1 | 0.944879389258477 |   |
| MV_Schw | A | 1817 | 81  | 3 | 0.88950624150852  |   |
| MV_Schw | G | 1818 | 110 | 3 |                   | 1 |
| MV_Schw | C | 1819 | 192 | 3 |                   | 1 |
| MV_Schw | A | 1820 | 190 | 2 | 0.950262622850522 |   |
| MV_Schw | G | 1821 | 149 | 3 |                   | 1 |
| MV_Schw | G | 1822 | 233 | 5 |                   | 1 |
| MV_Schw | C | 1823 | 209 | 4 |                   | 1 |
| MV_Schw | A | 1824 | 78  | 1 |                   | 1 |
| MV_Schw | C | 1825 | 203 | 8 | 0.265409150886041 |   |
| MV_Schw | G | 1826 | 289 | 5 |                   | 1 |
| MV_Schw | C | 1827 | 16  | 0 |                   | 1 |
| MV_Schw | C | 1828 | 89  | 0 | 0.497615650989996 |   |
| MV_Schw | A | 1829 | 12  | 1 | 0.88950624150852  |   |
| MV_Schw | T | 1830 | 16  | 1 | 0.483965165529824 |   |
| MV_Schw | G | 1831 | 35  | 1 | 0.863499923807603 |   |
| MV_Schw | T | 1832 | 29  | 1 | 0.789229943133706 |   |
| MV_Schw | C | 1833 | 169 | 7 | 0.369799389479636 |   |
| MV_Schw | A | 1834 | 14  | 0 |                   | 1 |

|         |   |      |     |    |                      |
|---------|---|------|-----|----|----------------------|
| MV_Schw | A | 1835 | 17  | 1  | 0.983041048229953    |
| MV_Schw | A | 1836 | 17  | 0  | 1                    |
| MV_Schw | A | 1837 | 41  | 1  | 1                    |
| MV_Schw | A | 1838 | 16  | 0  | 1                    |
| MV_Schw | C | 1839 | 60  | 2  | 0.983041048229953    |
| MV_Schw | G | 1840 | 37  | 1  | 1                    |
| MV_Schw | G | 1841 | 58  | 1  | 1                    |
| MV_Schw | A | 1842 | 23  | 0  | 1                    |
| MV_Schw | C | 1843 | 295 | 19 | 2.17650037716547e-05 |
| MV_Schw | T | 1844 | 10  | 0  | 1                    |
| MV_Schw | G | 1845 | 103 | 3  | 0.950262622850522    |
| MV_Schw | G | 1846 | 16  | 1  | 0.950262622850522    |
| MV_Schw | A | 1847 | 79  | 3  | 0.658415249679101    |
| MV_Schw | A | 1848 | 124 | 3  | 1                    |
| MV_Schw | T | 1849 | 52  | 1  | 1                    |
| MV_Schw | G | 1850 | 43  | 1  | 1                    |
| MV_Schw | C | 1851 | 76  | 1  | 1                    |
| MV_Schw | A | 1852 | 114 | 3  | 1                    |
| MV_Schw | T | 1853 | 114 | 6  | 0.116287881036388    |
| MV_Schw | C | 1854 | 459 | 18 | 0.0321058101511356   |
| MV_Schw | C | 1855 | 196 | 5  | 0.950262622850522    |
| MV_Schw | G | 1856 | 428 | 21 | 0.000412428784788986 |
| MV_Schw | G | 1857 | 70  | 3  | 0.819327818667335    |
| MV_Schw | G | 1858 | 452 | 32 | 2.24806724410208e-10 |
| MV_Schw | C | 1859 | 35  | 1  | 1                    |
| MV_Schw | T | 1860 | 52  | 2  | 0.78354985902497     |
| MV_Schw | C | 1861 | 91  | 1  | 1                    |
| MV_Schw | T | 1862 | 21  | 1  | 1                    |
| MV_Schw | C | 1863 | 176 | 1  | 0.648224297390367    |
| MV_Schw | A | 1864 | 41  | 1  | 1                    |
| MV_Schw | A | 1865 | 27  | 2  | 0.355295708921217    |
| MV_Schw | G | 1866 | 124 | 7  | 0.0769928239219915   |
| MV_Schw | G | 1867 | 347 | 7  | 1                    |
| MV_Schw | C | 1868 | 99  | 1  | 1                    |
| MV_Schw | C | 1869 | 143 | 3  | 1                    |
| MV_Schw | G | 1870 | 70  | 3  | 0.395791012435089    |

|         |   |      |     |   |                   |   |
|---------|---|------|-----|---|-------------------|---|
| MV_Schw | A | 1871 | 78  | 1 |                   | 1 |
| MV_Schw | G | 1872 | 54  | 3 | 0.480219983992261 |   |
| MV_Schw | C | 1873 | 17  | 0 |                   | 1 |
| MV_Schw | C | 1874 | 17  | 1 | 0.983041048229953 |   |
| MV_Schw | C | 1875 | 52  | 0 | 0.950262622850522 |   |
| MV_Schw | A | 1876 | 47  | 2 | 0.678058690427187 |   |
| MV_Schw | T | 1877 | 54  | 3 | 0.237817203872315 |   |
| MV_Schw | C | 1878 | 45  | 1 |                   | 1 |
| MV_Schw | G | 1879 | 68  | 3 | 0.378469870290234 |   |
| MV_Schw | G | 1880 | 62  | 3 | 0.307480793677112 |   |
| MV_Schw | C | 1881 | 23  | 1 |                   | 1 |
| MV_Schw | T | 1882 | 23  | 1 |                   | 1 |
| MV_Schw | C | 1883 | 35  | 1 |                   | 1 |
| MV_Schw | A | 1884 | 4   | 0 |                   | 1 |
| MV_Schw | C | 1885 | 27  | 2 | 0.355295708921217 |   |
| MV_Schw | T | 1886 | 81  | 1 |                   | 1 |
| MV_Schw | G | 1887 | 21  | 0 |                   | 1 |
| MV_Schw | G | 1888 | 12  | 0 |                   | 1 |
| MV_Schw | C | 1889 | 23  | 1 | 0.658415249679101 |   |
| MV_Schw | C | 1890 | 43  | 1 |                   | 1 |
| MV_Schw | A | 1891 | 27  | 1 |                   | 1 |
| MV_Schw | T | 1892 | 17  | 1 | 0.528591092326266 |   |
| MV_Schw | C | 1893 | 132 | 2 |                   | 1 |
| MV_Schw | G | 1894 | 70  | 1 |                   | 1 |
| MV_Schw | A | 1895 | 110 | 0 | 0.385864542883514 |   |
| MV_Schw | G | 1896 | 211 | 5 |                   | 1 |
| MV_Schw | G | 1897 | 180 | 3 |                   | 1 |
| MV_Schw | A | 1898 | 33  | 1 |                   | 1 |
| MV_Schw | A | 1899 | 21  | 0 |                   | 1 |
| MV_Schw | G | 1900 | 93  | 3 | 0.747390316041078 |   |
| MV_Schw | C | 1901 | 93  | 1 |                   | 1 |
| MV_Schw | T | 1902 | 41  | 1 |                   | 1 |
| MV_Schw | A | 1903 | 41  | 0 |                   | 1 |
| MV_Schw | T | 1904 | 81  | 0 | 0.641186461810141 |   |
| MV_Schw | G | 1905 | 114 | 0 | 0.395791012435089 |   |
| MV_Schw | G | 1906 | 116 | 3 |                   | 1 |

|         |   |      |     |    |                    |   |
|---------|---|------|-----|----|--------------------|---|
| MV_Schw | C | 1907 | 124 | 1  |                    | 1 |
| MV_Schw | A | 1908 | 35  | 1  | 0.863499923807603  |   |
| MV_Schw | G | 1909 | 141 | 3  |                    | 1 |
| MV_Schw | C | 1910 | 107 | 1  |                    | 1 |
| MV_Schw | A | 1911 | 91  | 2  |                    | 1 |
| MV_Schw | T | 1912 | 25  | 1  |                    | 1 |
| MV_Schw | G | 1913 | 16  | 0  |                    | 1 |
| MV_Schw | G | 1914 | 273 | 5  |                    | 1 |
| MV_Schw | T | 1915 | 12  | 0  |                    | 1 |
| MV_Schw | C | 1916 | 579 | 4  | 0.0284220601745394 |   |
| MV_Schw | A | 1917 | 103 | 2  |                    | 1 |
| MV_Schw | G | 1918 | 523 | 5  | 0.142549036275654  |   |
| MV_Schw | A | 1919 | 126 | 4  | 0.828135947034     |   |
| MV_Schw | A | 1920 | 47  | 3  | 0.161503851613234  |   |
| MV_Schw | A | 1921 | 37  | 1  | 0.88950624150852   |   |
| MV_Schw | T | 1922 | 58  | 2  | 0.98139756833885   |   |
| MV_Schw | A | 1923 | 39  | 1  | 0.9314909603024    |   |
| MV_Schw | T | 1924 | 12  | 0  |                    | 1 |
| MV_Schw | C | 1925 | 109 | 2  |                    | 1 |
| MV_Schw | A | 1926 | 221 | 1  | 0.356200658338914  |   |
| MV_Schw | G | 1927 | 172 | 3  |                    | 1 |
| MV_Schw | A | 1928 | 16  | 1  | 0.950262622850522  |   |
| MV_Schw | C | 1929 | 110 | 2  |                    | 1 |
| MV_Schw | A | 1930 | 4   | 0  |                    | 1 |
| MV_Schw | A | 1931 | 10  | 0  |                    | 1 |
| MV_Schw | C | 1932 | 116 | 3  | 0.957721317456694  |   |
| MV_Schw | C | 1933 | 68  | 1  |                    | 1 |
| MV_Schw | C | 1934 | 124 | 1  | 0.791667533131283  |   |
| MV_Schw | A | 1935 | 19  | 1  | 0.57780206681461   |   |
| MV_Schw | G | 1936 | 184 | 10 | 0.0161017557873181 |   |
| MV_Schw | G | 1937 | 126 | 5  | 0.536502598785117  |   |
| MV_Schw | A | 1938 | 37  | 1  |                    | 1 |
| MV_Schw | C | 1939 | 203 | 5  |                    | 1 |
| MV_Schw | A | 1940 | 8   | 0  |                    | 1 |
| MV_Schw | G | 1941 | 78  | 1  |                    | 1 |
| MV_Schw | G | 1942 | 568 | 6  | 0.277540685711253  |   |

|         |   |      |     |    |                    |   |
|---------|---|------|-----|----|--------------------|---|
| MV_Schw | A | 1943 | 35  | 0  |                    | 1 |
| MV_Schw | G | 1944 | 359 | 11 | 0.634563222137982  |   |
| MV_Schw | C | 1945 | 114 | 1  |                    | 1 |
| MV_Schw | G | 1946 | 203 | 5  |                    | 1 |
| MV_Schw | A | 1947 | 29  | 0  |                    | 1 |
| MV_Schw | G | 1948 | 432 | 9  |                    | 1 |
| MV_Schw | C | 1949 | 155 | 5  | 0.91293301557491   |   |
| MV_Schw | C | 1950 | 35  | 1  |                    | 1 |
| MV_Schw | A | 1951 | 54  | 1  |                    | 1 |
| MV_Schw | C | 1952 | 54  | 2  | 0.789229943133706  |   |
| MV_Schw | C | 1953 | 39  | 2  | 0.560243889454362  |   |
| MV_Schw | T | 1954 | 25  | 1  |                    | 1 |
| MV_Schw | G | 1955 | 132 | 1  | 0.983041048229953  |   |
| MV_Schw | C | 1956 | 109 | 3  |                    | 1 |
| MV_Schw | A | 1957 | 25  | 2  | 0.314611398059001  |   |
| MV_Schw | G | 1958 | 74  | 1  |                    | 1 |
| MV_Schw | G | 1959 | 91  | 1  |                    | 1 |
| MV_Schw | G | 1960 | 14  | 0  |                    | 1 |
| MV_Schw | A | 1961 | 17  | 0  |                    | 1 |
| MV_Schw | A | 1962 | 37  | 0  |                    | 1 |
| MV_Schw | G | 1963 | 192 | 9  | 0.0576044041671264 |   |
| MV_Schw | A | 1964 | 16  | 1  | 0.950262622850522  |   |
| MV_Schw | G | 1965 | 62  | 3  | 0.57780206681461   |   |
| MV_Schw | A | 1966 | 81  | 1  |                    | 1 |
| MV_Schw | A | 1967 | 45  | 1  |                    | 1 |
| MV_Schw | G | 1968 | 141 | 2  |                    | 1 |
| MV_Schw | G | 1969 | 60  | 1  |                    | 1 |
| MV_Schw | C | 1970 | 180 | 5  |                    | 1 |
| MV_Schw | A | 1971 | 39  | 0  |                    | 1 |
| MV_Schw | G | 1972 | 374 | 9  |                    | 1 |
| MV_Schw | G | 1973 | 186 | 7  | 0.44055837109039   |   |
| MV_Schw | C | 1974 | 64  | 3  | 0.609091736782917  |   |
| MV_Schw | A | 1975 | 48  | 1  |                    | 1 |
| MV_Schw | G | 1976 | 163 | 2  |                    | 1 |
| MV_Schw | T | 1977 | 130 | 3  |                    | 1 |
| MV_Schw | T | 1978 | 70  | 2  |                    | 1 |



|         |   |      |     |    |                   |
|---------|---|------|-----|----|-------------------|
| MV_Schw | C | 1979 | 409 | 11 | 0.950262622850522 |
| MV_Schw | G | 1980 | 238 | 3  | 0.88950624150852  |
| MV_Schw | G | 1981 | 285 | 3  | 0.606464429862209 |
| MV_Schw | G | 1982 | 413 | 10 | 1                 |
| MV_Schw | T | 1983 | 83  | 2  | 1                 |
| MV_Schw | C | 1984 | 81  | 0  | 0.641186461810141 |
| MV_Schw | T | 1985 | 8   | 0  | 1                 |
| MV_Schw | C | 1986 | 525 | 11 | 1                 |
| MV_Schw | A | 1987 | 298 | 5  | 1                 |
| MV_Schw | G | 1988 | 541 | 9  | 0.99007620189019  |
| MV_Schw | C | 1989 | 107 | 1  | 0.945767847051808 |
| MV_Schw | A | 1990 | 78  | 2  | 1                 |
| MV_Schw | A | 1991 | 23  | 1  | 0.658415249679101 |
| MV_Schw | A | 1992 | 16  | 0  | 1                 |
| MV_Schw | C | 1993 | 335 | 5  | 0.957721317456694 |
| MV_Schw | C | 1994 | 87  | 3  | 0.935220820395243 |
| MV_Schw | A | 1995 | 19  | 0  | 1                 |
| MV_Schw | T | 1996 | 39  | 3  | 0.273798916014578 |
| MV_Schw | G | 1997 | 39  | 1  | 0.9314909603024   |
| MV_Schw | C | 1998 | 89  | 1  | 1                 |
| MV_Schw | C | 1999 | 52  | 2  | 0.78354985902497  |
| MV_Schw | T | 2000 | 0   | 0  | 1                 |
| MV_Schw | C | 2001 | 58  | 2  | 0.98139756833885  |
| MV_Schw | T | 2002 | 8   | 1  | 0.258627633593378 |
| MV_Schw | C | 2003 | 122 | 3  | 0.983041048229953 |
| MV_Schw | A | 2004 | 47  | 1  | 1                 |
| MV_Schw | G | 2005 | 159 | 7  | 0.255832629066036 |
| MV_Schw | C | 2006 | 23  | 1  | 0.658415249679101 |
| MV_Schw | A | 2007 | 29  | 0  | 1                 |
| MV_Schw | A | 2008 | 29  | 1  | 1                 |
| MV_Schw | T | 2009 | 14  | 0  | 1                 |
| MV_Schw | T | 2010 | 14  | 0  | 1                 |
| MV_Schw | G | 2011 | 19  | 2  | 0.224063006917908 |
| MV_Schw | G | 2012 | 45  | 0  | 1                 |
| MV_Schw | A | 2013 | 31  | 0  | 1                 |
| MV_Schw | T | 2014 | 25  | 1  | 1                 |

|         |   |      |     |    |                   |
|---------|---|------|-----|----|-------------------|
| MV_Schw | C | 2015 | 10  | 1  | 0.822598489333375 |
| MV_Schw | A | 2016 | 10  | 1  | 0.822598489333375 |
| MV_Schw | A | 2017 | 8   | 0  | 1                 |
| MV_Schw | C | 2018 | 79  | 2  | 1                 |
| MV_Schw | T | 2019 | 56  | 2  | 0.968890372475178 |
| MV_Schw | G | 2020 | 27  | 1  | 1                 |
| MV_Schw | A | 2021 | 8   | 0  | 1                 |
| MV_Schw | A | 2022 | 91  | 1  | 1                 |
| MV_Schw | G | 2023 | 138 | 2  | 1                 |
| MV_Schw | G | 2024 | 45  | 3  | 0.340185031164498 |
| MV_Schw | C | 2025 | 50  | 1  | 1                 |
| MV_Schw | G | 2026 | 126 | 0  | 0.305061614162072 |
| MV_Schw | G | 2027 | 217 | 3  | 1                 |
| MV_Schw | T | 2028 | 130 | 3  | 1                 |
| MV_Schw | G | 2029 | 81  | 1  | 1                 |
| MV_Schw | C | 2030 | 43  | 1  | 1                 |
| MV_Schw | A | 2031 | 19  | 0  | 1                 |
| MV_Schw | C | 2032 | 52  | 3  | 0.445919862395878 |
| MV_Schw | C | 2033 | 678 | 17 | 0.944879389258477 |
| MV_Schw | T | 2034 | 25  | 0  | 1                 |
| MV_Schw | C | 2035 | 81  | 1  | 1                 |
| MV_Schw | G | 2036 | 27  | 0  | 1                 |
| MV_Schw | C | 2037 | 116 | 4  | 0.795434284511944 |
| MV_Schw | A | 2038 | 27  | 0  | 1                 |
| MV_Schw | T | 2039 | 10  | 0  | 1                 |
| MV_Schw | C | 2040 | 72  | 1  | 1                 |
| MV_Schw | C | 2041 | 25  | 0  | 1                 |
| MV_Schw | G | 2042 | 19  | 0  | 1                 |
| MV_Schw | C | 2043 | 60  | 1  | 1                 |
| MV_Schw | G | 2044 | 151 | 1  | 0.553693656798976 |
| MV_Schw | G | 2045 | 60  | 0  | 0.957721317456694 |
| MV_Schw | T | 2046 | 12  | 0  | 1                 |
| MV_Schw | C | 2047 | 48  | 1  | 1                 |
| MV_Schw | A | 2048 | 16  | 0  | 1                 |
| MV_Schw | G | 2049 | 155 | 7  | 0.237162696059595 |
| MV_Schw | G | 2050 | 16  | 0  | 1                 |

|         |   |      |     |    |                      |   |
|---------|---|------|-----|----|----------------------|---|
| MV_Schw | G | 2051 | 27  | 1  |                      | 1 |
| MV_Schw | A | 2052 | 19  | 1  |                      | 1 |
| MV_Schw | C | 2053 | 43  | 3  | 0.12801336938299     |   |
| MV_Schw | C | 2054 | 60  | 5  | 0.0155102898705156   |   |
| MV_Schw | T | 2055 | 39  | 1  | 0.9314909603024      |   |
| MV_Schw | G | 2056 | 50  | 2  | 0.746970975838775    |   |
| MV_Schw | G | 2057 | 45  | 0  |                      | 1 |
| MV_Schw | A | 2058 | 41  | 0  |                      | 1 |
| MV_Schw | G | 2059 | 72  | 1  |                      | 1 |
| MV_Schw | A | 2060 | 12  | 0  |                      | 1 |
| MV_Schw | G | 2061 | 37  | 1  |                      | 1 |
| MV_Schw | A | 2062 | 12  | 1  | 0.88950624150852     |   |
| MV_Schw | G | 2063 | 213 | 5  |                      | 1 |
| MV_Schw | C | 2064 | 105 | 5  | 0.168224922173507    |   |
| MV_Schw | G | 2065 | 62  | 1  |                      | 1 |
| MV_Schw | A | 2066 | 68  | 2  |                      | 1 |
| MV_Schw | T | 2067 | 120 | 4  | 0.813457243243208    |   |
| MV_Schw | G | 2068 | 103 | 1  | 0.944879389258477    |   |
| MV_Schw | A | 2069 | 16  | 0  |                      | 1 |
| MV_Schw | C | 2070 | 572 | 22 | 0.0188268016494874   |   |
| MV_Schw | G | 2071 | 79  | 3  | 0.658415249679101    |   |
| MV_Schw | A | 2072 | 25  | 1  |                      | 1 |
| MV_Schw | C | 2073 | 147 | 7  | 0.126593150614623    |   |
| MV_Schw | G | 2074 | 58  | 1  |                      | 1 |
| MV_Schw | C | 2075 | 213 | 12 | 0.00444230988652097  |   |
| MV_Schw | T | 2076 | 50  | 1  |                      | 1 |
| MV_Schw | G | 2077 | 188 | 9  | 0.0529105666346528   |   |
| MV_Schw | A | 2078 | 35  | 1  |                      | 1 |
| MV_Schw | A | 2079 | 31  | 1  | 0.791667533131283    |   |
| MV_Schw | A | 2080 | 19  | 0  |                      | 1 |
| MV_Schw | C | 2081 | 112 | 3  | 0.950262622850522    |   |
| MV_Schw | T | 2082 | 48  | 5  | 0.0200563728790100   |   |
| MV_Schw | T | 2083 | 21  | 1  |                      | 1 |
| MV_Schw | T | 2084 | 153 | 3  |                      | 1 |
| MV_Schw | G | 2085 | 448 | 7  |                      | 1 |
| MV_Schw | G | 2086 | 116 | 9  | 0.000920302878117562 |   |

|         |   |      |     |    |                    |   |
|---------|---|------|-----|----|--------------------|---|
| MV_Schw | G | 2087 | 141 | 4  |                    | 1 |
| MV_Schw | A | 2088 | 14  | 0  |                    | 1 |
| MV_Schw | A | 2089 | 23  | 0  |                    | 1 |
| MV_Schw | T | 2090 | 19  | 0  |                    | 1 |
| MV_Schw | C | 2091 | 145 | 6  | 0.307480793677112  |   |
| MV_Schw | C | 2092 | 169 | 5  | 0.789229943133706  |   |
| MV_Schw | C | 2093 | 289 | 13 | 0.0390381057026112 |   |
| MV_Schw | C | 2094 | 93  | 3  |                    | 1 |
| MV_Schw | C | 2095 | 217 | 7  | 0.770363429662708  |   |
| MV_Schw | C | 2096 | 347 | 9  |                    | 1 |
| MV_Schw | A | 2097 | 194 | 3  |                    | 1 |
| MV_Schw | A | 2098 | 25  | 0  |                    | 1 |
| MV_Schw | G | 2099 | 428 | 9  |                    | 1 |
| MV_Schw | A | 2100 | 17  | 1  | 0.983041048229953  |   |
| MV_Schw | A | 2101 | 21  | 0  |                    | 1 |
| MV_Schw | A | 2102 | 14  | 0  |                    | 1 |
| MV_Schw | T | 2103 | 68  | 1  |                    | 1 |
| MV_Schw | C | 2104 | 153 | 4  |                    | 1 |
| MV_Schw | T | 2105 | 25  | 0  |                    | 1 |
| MV_Schw | C | 2106 | 217 | 6  | 0.969676682971856  |   |
| MV_Schw | C | 2107 | 233 | 3  |                    | 1 |
| MV_Schw | A | 2108 | 41  | 2  | 0.599534349993353  |   |
| MV_Schw | G | 2109 | 29  | 1  | 0.789229943133706  |   |
| MV_Schw | G | 2110 | 47  | 2  | 0.678058690427187  |   |
| MV_Schw | C | 2111 | 4   | 0  |                    | 1 |
| MV_Schw | A | 2112 | 43  | 0  |                    | 1 |
| MV_Schw | T | 2113 | 10  | 0  |                    | 1 |
| MV_Schw | C | 2114 | 66  | 1  |                    | 1 |
| MV_Schw | A | 2115 | 12  | 1  | 0.88950624150852   |   |
| MV_Schw | A | 2116 | 6   | 0  |                    | 1 |
| MV_Schw | G | 2117 | 97  | 1  |                    | 1 |
| MV_Schw | C | 2118 | 105 | 2  |                    | 1 |
| MV_Schw | A | 2119 | 10  | 0  |                    | 1 |
| MV_Schw | C | 2120 | 176 | 4  |                    | 1 |
| MV_Schw | T | 2121 | 4   | 0  |                    | 1 |
| MV_Schw | G | 2122 | 31  | 0  |                    | 1 |

|         |   |      |     |   |                    |   |
|---------|---|------|-----|---|--------------------|---|
| MV_Schw | G | 2123 | 19  | 1 |                    | 1 |
| MV_Schw | G | 2124 | 58  | 2 | 0.98139756833885   |   |
| MV_Schw | T | 2125 | 21  | 0 |                    | 1 |
| MV_Schw | T | 2126 | 2   | 0 |                    | 1 |
| MV_Schw | A | 2127 | 6   | 0 |                    | 1 |
| MV_Schw | C | 2128 | 33  | 1 | 0.822598489333375  |   |
| MV_Schw | A | 2129 | 12  | 0 |                    | 1 |
| MV_Schw | G | 2130 | 151 | 1 | 0.553693656798976  |   |
| MV_Schw | T | 2131 | 17  | 0 |                    | 1 |
| MV_Schw | G | 2132 | 54  | 1 |                    | 1 |
| MV_Schw | T | 2133 | 4   | 0 |                    | 1 |
| MV_Schw | T | 2134 | 23  | 1 |                    | 1 |
| MV_Schw | A | 2135 | 64  | 2 |                    | 1 |
| MV_Schw | T | 2136 | 45  | 0 |                    | 1 |
| MV_Schw | T | 2137 | 31  | 2 | 0.428411386231373  |   |
| MV_Schw | A | 2138 | 21  | 3 | 0.0746595992424665 |   |
| MV_Schw | C | 2139 | 62  | 0 | 0.789229943133706  |   |
| MV_Schw | G | 2140 | 200 | 5 | 0.953489044526869  |   |
| MV_Schw | T | 2141 | 6   | 1 | 0.704667204683568  |   |
| MV_Schw | T | 2142 | 35  | 1 |                    | 1 |
| MV_Schw | T | 2143 | 54  | 0 | 0.950262622850522  |   |
| MV_Schw | A | 2144 | 6   | 1 | 0.704667204683568  |   |
| MV_Schw | T | 2145 | 29  | 0 |                    | 1 |
| MV_Schw | G | 2146 | 287 | 7 |                    | 1 |
| MV_Schw | A | 2147 | 43  | 0 |                    | 1 |
| MV_Schw | T | 2148 | 17  | 0 |                    | 1 |
| MV_Schw | C | 2149 | 41  | 2 | 0.599534349993353  |   |
| MV_Schw | A | 2150 | 48  | 3 | 0.390345857720356  |   |
| MV_Schw | C | 2151 | 269 | 6 |                    | 1 |
| MV_Schw | A | 2152 | 33  | 3 | 0.197209929577240  |   |
| MV_Schw | G | 2153 | 169 | 8 | 0.109336969642784  |   |
| MV_Schw | C | 2154 | 62  | 1 |                    | 1 |
| MV_Schw | G | 2155 | 130 | 3 |                    | 1 |
| MV_Schw | G | 2156 | 95  | 3 | 0.764161655608143  |   |
| MV_Schw | T | 2157 | 25  | 0 |                    | 1 |
| MV_Schw | G | 2158 | 151 | 5 | 0.897349285586955  |   |

|         |   |      |      |    |                      |
|---------|---|------|------|----|----------------------|
| MV_Schw | A | 2159 | 60   | 3  | 0.298698990757132    |
| MV_Schw | A | 2160 | 297  | 7  | 1                    |
| MV_Schw | G | 2161 | 329  | 11 | 0.307480793677112    |
| MV_Schw | C | 2162 | 91   | 7  | 0.0147022297036108   |
| MV_Schw | G | 2163 | 326  | 13 | 0.124094801360285    |
| MV_Schw | G | 2164 | 314  | 16 | 0.00237763400740755  |
| MV_Schw | T | 2165 | 52   | 3  | 0.445919862395878    |
| MV_Schw | T | 2166 | 188  | 8  | 0.224063006917908    |
| MV_Schw | A | 2167 | 54   | 3  | 0.237817203872315    |
| MV_Schw | A | 2168 | 1060 | 42 | 9.98485940591552e-05 |
| MV_Schw | G | 2169 | 752  | 41 | 3.21769210638808e-09 |
| MV_Schw | G | 2170 | 550  | 31 | 2.4412537146314e-07  |
| MV_Schw | G | 2171 | 81   | 9  | 3.55435878669501e-05 |
| MV_Schw | A | 2172 | 10   | 1  | 0.822598489333375    |
| MV_Schw | A | 2173 | 260  | 10 | 0.211230433289291    |
| MV_Schw | T | 2174 | 56   | 4  | 0.106459164393546    |
| MV_Schw | C | 2175 | 1029 | 43 | 1.31887073627038e-05 |
| MV_Schw | C | 2176 | 273  | 12 | 0.0488236628860313   |
| MV_Schw | A | 2177 | 126  | 3  | 1                    |
| MV_Schw | A | 2178 | 64   | 4  | 0.158900683800736    |
| MV_Schw | G | 2179 | 438  | 12 | 0.789229943133706    |
| MV_Schw | A | 2180 | 33   | 3  | 0.0621625989443951   |
| MV_Schw | T | 2181 | 227  | 13 | 0.00138700917665090  |
| MV_Schw | G | 2182 | 578  | 18 | 0.307162781591674    |
| MV_Schw | C | 2183 | 128  | 7  | 0.0898325700744241   |
| MV_Schw | T | 2184 | 99   | 4  | 0.560243889454362    |
| MV_Schw | G | 2185 | 145  | 4  | 1                    |
| MV_Schw | A | 2186 | 122  | 7  | 0.0310014318320891   |
| MV_Schw | C | 2187 | 174  | 8  | 0.121832950892168    |
| MV_Schw | T | 2188 | 10   | 1  | 0.822598489333375    |
| MV_Schw | C | 2189 | 78   | 2  | 1                    |
| MV_Schw | T | 2190 | 29   | 1  | 1                    |
| MV_Schw | A | 2191 | 48   | 3  | 0.390345857720356    |
| MV_Schw | T | 2192 | 60   | 2  | 0.983041048229953    |
| MV_Schw | C | 2193 | 114  | 5  | 0.463720798159947    |
| MV_Schw | A | 2194 | 27   | 0  | 1                    |

|         |   |      |     |    |                    |   |
|---------|---|------|-----|----|--------------------|---|
| MV_Schw | T | 2195 | 21  | 1  |                    | 1 |
| MV_Schw | G | 2196 | 25  | 3  | 0.0284220601745394 |   |
| MV_Schw | G | 2197 | 448 | 14 | 0.379992343008361  |   |
| MV_Schw | T | 2198 | 17  | 1  | 0.983041048229953  |   |
| MV_Schw | T | 2199 | 4   | 0  |                    | 1 |
| MV_Schw | C | 2200 | 35  | 2  | 0.497615650989996  |   |
| MV_Schw | A | 2201 | 19  | 1  |                    | 1 |
| MV_Schw | A | 2202 | 66  | 2  |                    | 1 |
| MV_Schw | T | 2203 | 56  | 2  | 0.968890372475178  |   |
| MV_Schw | C | 2204 | 153 | 6  | 0.456036065441935  |   |
| MV_Schw | A | 2205 | 6   | 1  | 0.704667204683568  |   |
| MV_Schw | G | 2206 | 35  | 1  |                    | 1 |
| MV_Schw | G | 2207 | 112 | 1  |                    | 1 |
| MV_Schw | C | 2208 | 329 | 12 | 0.187874728258615  |   |
| MV_Schw | C | 2209 | 48  | 2  | 0.709032941865358  |   |
| MV_Schw | T | 2210 | 25  | 1  |                    | 1 |
| MV_Schw | T | 2211 | 21  | 0  |                    | 1 |
| MV_Schw | G | 2212 | 85  | 1  |                    | 1 |
| MV_Schw | A | 2213 | 23  | 1  | 0.658415249679101  |   |
| MV_Schw | T | 2214 | 116 | 5  | 0.479133435065576  |   |
| MV_Schw | G | 2215 | 93  | 4  | 0.532185081645424  |   |
| MV_Schw | G | 2216 | 174 | 6  | 0.658415249679101  |   |
| MV_Schw | T | 2217 | 81  | 4  | 0.305908359426921  |   |
| MV_Schw | G | 2218 | 112 | 3  |                    | 1 |
| MV_Schw | A | 2219 | 143 | 3  |                    | 1 |
| MV_Schw | T | 2220 | 205 | 7  | 0.619556855087002  |   |
| MV_Schw | A | 2221 | 79  | 0  | 0.639207655977387  |   |
| MV_Schw | G | 2222 | 132 | 3  |                    | 1 |
| MV_Schw | C | 2223 | 149 | 2  |                    | 1 |
| MV_Schw | A | 2224 | 12  | 0  |                    | 1 |
| MV_Schw | C | 2225 | 130 | 2  |                    | 1 |
| MV_Schw | C | 2226 | 47  | 1  |                    | 1 |
| MV_Schw | C | 2227 | 91  | 2  |                    | 1 |
| MV_Schw | T | 2228 | 10  | 0  |                    | 1 |
| MV_Schw | C | 2229 | 155 | 1  | 0.88950624150852   |   |
| MV_Schw | T | 2230 | 23  | 0  |                    | 1 |

|         |   |      |     |    |                      |
|---------|---|------|-----|----|----------------------|
| MV_Schw | C | 2231 | 122 | 3  | 0.983041048229953    |
| MV_Schw | A | 2232 | 171 | 1  | 0.789229943133706    |
| MV_Schw | G | 2233 | 234 | 3  | 1                    |
| MV_Schw | G | 2234 | 41  | 0  | 1                    |
| MV_Schw | A | 2235 | 21  | 0  | 1                    |
| MV_Schw | G | 2236 | 43  | 0  | 1                    |
| MV_Schw | G | 2237 | 153 | 1  | 0.88950624150852     |
| MV_Schw | A | 2238 | 41  | 1  | 1                    |
| MV_Schw | G | 2239 | 105 | 2  | 1                    |
| MV_Schw | A | 2240 | 4   | 0  | 1                    |
| MV_Schw | C | 2241 | 72  | 1  | 1                    |
| MV_Schw | A | 2242 | 56  | 1  | 1                    |
| MV_Schw | A | 2243 | 68  | 1  | 1                    |
| MV_Schw | T | 2244 | 132 | 3  | 1                    |
| MV_Schw | G | 2245 | 47  | 0  | 1                    |
| MV_Schw | A | 2246 | 6   | 0  | 1                    |
| MV_Schw | A | 2247 | 23  | 1  | 1                    |
| MV_Schw | T | 2248 | 37  | 1  | 1                    |
| MV_Schw | C | 2249 | 399 | 3  | 0.234360961542297    |
| MV_Schw | T | 2250 | 248 | 3  | 0.789229943133706    |
| MV_Schw | G | 2251 | 174 | 5  | 1                    |
| MV_Schw | A | 2252 | 196 | 7  | 0.342103452023548    |
| MV_Schw | A | 2253 | 306 | 8  | 0.950262622850522    |
| MV_Schw | A | 2254 | 76  | 3  | 0.467924584055268    |
| MV_Schw | A | 2255 | 74  | 4  | 0.237817203872315    |
| MV_Schw | C | 2256 | 508 | 8  | 0.98139756833885     |
| MV_Schw | A | 2257 | 47  | 3  | 0.161503851613234    |
| MV_Schw | G | 2258 | 283 | 5  | 1                    |
| MV_Schw | C | 2259 | 118 | 13 | 3.63666358713052e-07 |
| MV_Schw | G | 2260 | 91  | 7  | 0.00480369783421750  |
| MV_Schw | A | 2261 | 43  | 3  | 0.308038546605154    |
| MV_Schw | T | 2262 | 101 | 3  | 0.789229943133706    |
| MV_Schw | G | 2263 | 107 | 4  | 0.619556855087002    |
| MV_Schw | T | 2264 | 236 | 6  | 1                    |
| MV_Schw | G | 2265 | 112 | 5  | 0.449295143732283    |
| MV_Schw | G | 2266 | 52  | 7  | 8.92355533329314e-05 |



|         |   |      |      |    |                      |
|---------|---|------|------|----|----------------------|
| MV_Schw | A | 2267 | 93   | 7  | 0.00551710625234576  |
| MV_Schw | T | 2268 | 37   | 3  | 0.245202640825390    |
| MV_Schw | A | 2269 | 110  | 4  | 0.639207655977387    |
| MV_Schw | T | 2270 | 31   | 1  | 1                    |
| MV_Schw | T | 2271 | 368  | 21 | 5.58141355133881e-05 |
| MV_Schw | G | 2272 | 1054 | 37 | 0.00481222959521215  |
| MV_Schw | G | 2273 | 713  | 23 | 0.104857264946041    |
| MV_Schw | C | 2274 | 285  | 14 | 0.00793670273477432  |
| MV_Schw | G | 2275 | 612  | 48 | 2.64657277311893e-17 |
| MV_Schw | A | 2276 | 25   | 1  | 0.704667204683568    |
| MV_Schw | A | 2277 | 78   | 4  | 0.275013872879573    |
| MV_Schw | C | 2278 | 126  | 8  | 0.0148778935506708   |
| MV_Schw | C | 2279 | 366  | 13 | 0.166517226253501    |
| MV_Schw | T | 2280 | 31   | 1  | 0.791667533131283    |
| MV_Schw | G | 2281 | 41   | 2  | 0.599534349993353    |
| MV_Schw | A | 2282 | 39   | 1  | 0.9314909603024      |
| MV_Schw | T | 2283 | 134  | 8  | 0.0221448235477836   |
| MV_Schw | A | 2284 | 8    | 0  | 1                    |
| MV_Schw | C | 2285 | 229  | 11 | 0.042880960988935    |
| MV_Schw | C | 2286 | 103  | 3  | 0.950262622850522    |
| MV_Schw | G | 2287 | 132  | 1  | 0.983041048229953    |
| MV_Schw | A | 2288 | 316  | 11 | 0.370762137324516    |
| MV_Schw | G | 2289 | 942  | 36 | 0.00111676234009455  |
| MV_Schw | G | 2290 | 355  | 14 | 0.077975044515965    |
| MV_Schw | G | 2291 | 39   | 0  | 1                    |
| MV_Schw | A | 2292 | 47   | 3  | 0.161503851613234    |
| MV_Schw | T | 2293 | 39   | 3  | 0.273798916014578    |
| MV_Schw | A | 2294 | 153  | 8  | 0.0501800242731928   |
| MV_Schw | T | 2295 | 58   | 3  | 0.528591092326266    |
| MV_Schw | G | 2296 | 112  | 3  | 0.950262622850522    |
| MV_Schw | C | 2297 | 279  | 8  | 0.822598489333375    |
| MV_Schw | T | 2298 | 244  | 4  | 1                    |
| MV_Schw | A | 2299 | 83   | 2  | 1                    |
| MV_Schw | T | 2300 | 138  | 7  | 0.0603533834492057   |
| MV_Schw | C | 2301 | 178  | 4  | 1                    |
| MV_Schw | A | 2302 | 60   | 2  | 0.983041048229953    |

|         |    |      |      |    |                    |    |
|---------|----|------|------|----|--------------------|----|
| MV_Schw | C  | 2303 | 209  | 7  | 0.74759132369802   |    |
| MV_Schw | T  | 2304 | 62   | 1  |                    | 1  |
| MV_Schw | G  | 2305 | 231  | 7  | 0.88950624150852   |    |
| MV_Schw | A  | 2306 | 41   | 1  | 0.945767847051808  |    |
| MV_Schw | C  | 2307 | 756  | 18 |                    | 1  |
| MV_Schw | C  | 2308 | 2291 | 63 | 0.0791520775103201 |    |
| MV_Schw | G  | 2309 | 114  | 4  | 0.658415249679101  |    |
| MV_Schw | G  | 2310 | 384  | 11 | 0.652701935619823  |    |
| MV_Schw | G  | 2311 | 463  | 16 | 0.161587872238033  |    |
| MV_Schw | G  | 2312 | 281  | 8  | 0.824463476303577  |    |
| MV_Schw | A  | 2313 | 147  | 2  |                    | 1  |
| MV_Schw | T  | 2314 | 165  | 2  |                    | 1  |
| MV_Schw | C  | 2315 | 165  | 2  |                    | 1  |
| MV_Schw | T  | 2316 | 70   | 1  |                    | 1  |
| MV_Schw | G  | 2317 | 141  | 0  | 0.235179608025014  |    |
| MV_Schw | C  | 2318 | 545  | 17 | 0.337352366102426  |    |
| MV_Schw | T  | 2319 | 269  | 9  | 0.609091736782917  |    |
| MV_Schw | C  | 2320 | 421  | 5  | 0.49563608840948   |    |
| MV_Schw | C  | 2321 | 81   | 1  |                    | 1  |
| MV_Schw | C  | 2322 | 99   | 0  | 0.509396577320122  |    |
| MV_Schw | A  | 2323 | 83   | 2  |                    | 1  |
| MV_Schw | T  | 2324 | 85   | 0  | 0.648224297390367  |    |
| MV_Schw | C  | 2325 | 78   | 0  | 0.638894311640422  |    |
| MV_Schw | NA | 2326 | 0    | 0  |                    | NA |
| MV_Schw | C  | 2327 | 70   | 1  |                    | 1  |
| MV_Schw | T  | 2328 | 29   | 0  |                    | 1  |
| MV_Schw | A  | 2329 | 155  | 3  |                    | 1  |
| MV_Schw | T  | 2330 | 93   | 3  |                    | 1  |
| MV_Schw | G  | 2331 | 151  | 1  | 0.88950624150852   |    |
| MV_Schw | G  | 2332 | 29   | 1  |                    | 1  |
| MV_Schw | G  | 2333 | 50   | 1  |                    | 1  |
| MV_Schw | G  | 2334 | 143  | 3  |                    | 1  |
| MV_Schw | T  | 2335 | 103  | 1  |                    | 1  |
| MV_Schw | T  | 2336 | 23   | 0  |                    | 1  |
| MV_Schw | C  | 2337 | 203  | 3  |                    | 1  |
| MV_Schw | A  | 2338 | 128  | 1  |                    | 1  |

|         |   |      |      |    |                      |
|---------|---|------|------|----|----------------------|
| MV_Schw | G | 2339 | 517  | 5  | 0.178157396746871    |
| MV_Schw | G | 2340 | 347  | 9  | 0.9148119441053      |
| MV_Schw | G | 2341 | 60   | 1  | 1                    |
| MV_Schw | C | 2342 | 23   | 0  | 1                    |
| MV_Schw | T | 2343 | 58   | 1  | 1                    |
| MV_Schw | T | 2344 | 16   | 0  | 1                    |
| MV_Schw | C | 2345 | 266  | 6  | 1                    |
| MV_Schw | T | 2346 | 19   | 0  | 1                    |
| MV_Schw | G | 2347 | 39   | 1  | 1                    |
| MV_Schw | A | 2348 | 6    | 0  | 1                    |
| MV_Schw | T | 2349 | 27   | 1  | 0.752394317790241    |
| MV_Schw | G | 2350 | 188  | 7  | 0.555926296680122    |
| MV_Schw | T | 2351 | 16   | 1  | 0.950262622850522    |
| MV_Schw | T | 2352 | 48   | 3  | 0.390345857720356    |
| MV_Schw | G | 2353 | 87   | 2  | 1                    |
| MV_Schw | A | 2354 | 23   | 0  | 1                    |
| MV_Schw | A | 2355 | 16   | 1  | 0.950262622850522    |
| MV_Schw | A | 2356 | 58   | 1  | 1                    |
| MV_Schw | C | 2357 | 105  | 3  | 1                    |
| MV_Schw | T | 2358 | 35   | 2  | 0.497615650989996    |
| MV_Schw | G | 2359 | 93   | 3  | 1                    |
| MV_Schw | C | 2360 | 314  | 5  | 1                    |
| MV_Schw | A | 2361 | 403  | 9  | 1                    |
| MV_Schw | G | 2362 | 149  | 9  | 0.0189378145207759   |
| MV_Schw | A | 2363 | 31   | 0  | 1                    |
| MV_Schw | A | 2364 | 17   | 1  | 0.528591092326266    |
| MV_Schw | G | 2365 | 124  | 5  | 0.346347435414351    |
| MV_Schw | G | 2366 | 45   | 4  | 0.0485139564708208   |
| MV_Schw | A | 2367 | 116  | 3  | 0.957721317456694    |
| MV_Schw | G | 2368 | 78   | 5  | 0.0496502660885715   |
| MV_Schw | G | 2369 | 1058 | 52 | 2.22461211537221e-09 |
| MV_Schw | G | 2370 | 64   | 6  | 0.00616503932535731  |
| MV_Schw | G | 2371 | 81   | 4  | 0.305908359426921    |
| MV_Schw | A | 2372 | 27   | 0  | 1                    |
| MV_Schw | G | 2373 | 200  | 15 | 3.56079206718346e-05 |
| MV_Schw | A | 2374 | 21   | 2  | 0.258627633593378    |

|         |   |      |      |    |                      |   |
|---------|---|------|------|----|----------------------|---|
| MV_Schw | T | 2375 | 95   | 3  |                      | 1 |
| MV_Schw | C | 2376 | 395  | 12 | 0.576193745443697    |   |
| MV_Schw | C | 2377 | 215  | 6  | 0.88950624150852     |   |
| MV_Schw | A | 2378 | 217  | 9  | 0.136107188572645    |   |
| MV_Schw | C | 2379 | 702  | 17 |                      | 1 |
| MV_Schw | G | 2380 | 1614 | 60 | 1.78197142667677e-05 |   |
| MV_Schw | A | 2381 | 39   | 2  | 0.560243889454362    |   |
| MV_Schw | G | 2382 | 364  | 15 | 0.0583988383013822   |   |
| MV_Schw | C | 2383 | 25   | 3  | 0.110260611333144    |   |
| MV_Schw | T | 2384 | 74   | 1  |                      | 1 |
| MV_Schw | C | 2385 | 138  | 5  | 0.426789350155389    |   |
| MV_Schw | C | 2386 | 155  | 7  | 0.142612684840558    |   |
| MV_Schw | T | 2387 | 328  | 7  |                      | 1 |
| MV_Schw | G | 2388 | 74   | 4  | 0.237817203872315    |   |
| MV_Schw | A | 2389 | 54   | 1  |                      | 1 |
| MV_Schw | G | 2390 | 254  | 6  |                      | 1 |
| MV_Schw | A | 2391 | 8    | 0  |                      | 1 |
| MV_Schw | C | 2392 | 203  | 3  |                      | 1 |
| MV_Schw | T | 2393 | 6    | 0  |                      | 1 |
| MV_Schw | C | 2394 | 27   | 3  | 0.128277619623459    |   |
| MV_Schw | C | 2395 | 66   | 3  | 0.633417216184605    |   |
| MV_Schw | A | 2396 | 60   | 3  | 0.550155392537109    |   |
| MV_Schw | A | 2397 | 112  | 3  | 0.950262622850522    |   |
| MV_Schw | T | 2398 | 72   | 3  | 0.822598489333375    |   |
| MV_Schw | C | 2399 | 58   | 1  |                      | 1 |
| MV_Schw | C | 2400 | 37   | 1  | 0.88950624150852     |   |
| MV_Schw | A | 2401 | 16   | 0  |                      | 1 |
| MV_Schw | G | 2402 | 610  | 29 | 3.05292751692068e-05 |   |
| MV_Schw | A | 2403 | 64   | 5  | 0.0611551441006359   |   |
| MV_Schw | G | 2404 | 43   | 3  | 0.308038546605154    |   |
| MV_Schw | G | 2405 | 17   | 2  | 0.190596323698557    |   |
| MV_Schw | C | 2406 | 64   | 0  | 0.789229943133706    |   |
| MV_Schw | A | 2407 | 35   | 3  | 0.0735418108684054   |   |
| MV_Schw | A | 2408 | 21   | 1  | 0.632968068765344    |   |
| MV_Schw | C | 2409 | 147  | 5  | 0.77901773725233     |   |
| MV_Schw | A | 2410 | 35   | 3  | 0.0735418108684054   |   |

|         |   |      |      |    |                    |   |
|---------|---|------|------|----|--------------------|---|
| MV_Schw | A | 2411 | 6    | 0  |                    | 1 |
| MV_Schw | C | 2412 | 70   | 1  |                    | 1 |
| MV_Schw | T | 2413 | 4    | 1  | 0.619556855087002  |   |
| MV_Schw | T | 2414 | 16   | 0  |                    | 1 |
| MV_Schw | T | 2415 | 47   | 1  |                    | 1 |
| MV_Schw | C | 2416 | 300  | 5  |                    | 1 |
| MV_Schw | C | 2417 | 153  | 4  |                    | 1 |
| MV_Schw | G | 2418 | 353  | 8  |                    | 1 |
| MV_Schw | A | 2419 | 122  | 8  | 0.0120389277086904 |   |
| MV_Schw | A | 2420 | 31   | 1  | 0.791667533131283  |   |
| MV_Schw | G | 2421 | 107  | 3  |                    | 1 |
| MV_Schw | C | 2422 | 56   | 0  | 0.950262622850522  |   |
| MV_Schw | T | 2423 | 12   | 1  | 0.88950624150852   |   |
| MV_Schw | T | 2424 | 39   | 0  |                    | 1 |
| MV_Schw | G | 2425 | 200  | 4  |                    | 1 |
| MV_Schw | G | 2426 | 219  | 5  |                    | 1 |
| MV_Schw | G | 2427 | 143  | 5  | 0.573631722949456  |   |
| MV_Schw | A | 2428 | 76   | 2  |                    | 1 |
| MV_Schw | A | 2429 | 31   | 1  |                    | 1 |
| MV_Schw | A | 2430 | 12   | 0  |                    | 1 |
| MV_Schw | A | 2431 | 16   | 0  |                    | 1 |
| MV_Schw | C | 2432 | 452  | 9  |                    | 1 |
| MV_Schw | T | 2433 | 180  | 6  | 0.670827466361185  |   |
| MV_Schw | C | 2434 | 211  | 8  | 0.296710762771661  |   |
| MV_Schw | T | 2435 | 12   | 0  |                    | 1 |
| MV_Schw | C | 2436 | 167  | 1  | 0.788293646497135  |   |
| MV_Schw | A | 2437 | 50   | 1  |                    | 1 |
| MV_Schw | A | 2438 | 21   | 1  | 0.632968068765344  |   |
| MV_Schw | T | 2439 | 29   | 0  |                    | 1 |
| MV_Schw | G | 2440 | 50   | 1  |                    | 1 |
| MV_Schw | T | 2441 | 4    | 0  |                    | 1 |
| MV_Schw | T | 2442 | 19   | 1  |                    | 1 |
| MV_Schw | C | 2443 | 114  | 1  |                    | 1 |
| MV_Schw | C | 2444 | 1322 | 34 | 0.540687571104445  |   |
| MV_Schw | T | 2445 | 12   | 1  | 0.366832525336205  |   |
| MV_Schw | C | 2446 | 163  | 7  | 0.164143974394285  |   |

|         |   |      |     |    |                      |
|---------|---|------|-----|----|----------------------|
| MV_Schw | C | 2447 | 43  | 4  | 0.041842975175859    |
| MV_Schw | G | 2448 | 76  | 5  | 0.116125222018745    |
| MV_Schw | C | 2449 | 27  | 1  | 1                    |
| MV_Schw | C | 2450 | 45  | 5  | 0.0140368018204807   |
| MV_Schw | C | 2451 | 161 | 5  | 0.934340244643933    |
| MV_Schw | C | 2452 | 236 | 17 | 1.49039358436768e-05 |
| MV_Schw | C | 2453 | 240 | 8  | 0.547090293958293    |
| MV_Schw | G | 2454 | 126 | 7  | 0.083457367961719    |
| MV_Schw | G | 2455 | 153 | 8  | 0.0501800242731928   |
| MV_Schw | A | 2456 | 14  | 1  | 0.944879389258477    |
| MV_Schw | C | 2457 | 85  | 4  | 0.334109727673165    |
| MV_Schw | C | 2458 | 56  | 6  | 0.00293979958221681  |
| MV_Schw | C | 2459 | 72  | 5  | 0.094193442838711    |
| MV_Schw | C | 2460 | 47  | 5  | 0.0168325917140815   |
| MV_Schw | G | 2461 | 141 | 8  | 0.0316424857945862   |
| MV_Schw | G | 2462 | 353 | 15 | 0.0362672487329904   |
| MV_Schw | T | 2463 | 52  | 1  | 1                    |
| MV_Schw | A | 2464 | 37  | 2  | 0.528591092326266    |
| MV_Schw | G | 2465 | 56  | 1  | 1                    |
| MV_Schw | G | 2466 | 45  | 3  | 0.340185031164498    |
| MV_Schw | G | 2467 | 151 | 10 | 0.00309765049577835  |
| MV_Schw | C | 2468 | 302 | 16 | 0.001676102656448    |
| MV_Schw | C | 2469 | 355 | 11 | 0.434081909213343    |
| MV_Schw | A | 2470 | 128 | 10 | 0.000675922425289583 |
| MV_Schw | G | 2471 | 128 | 4  | 0.840295409296105    |
| MV_Schw | C | 2472 | 267 | 15 | 0.00157710345353172  |
| MV_Schw | A | 2473 | 35  | 3  | 0.222002676269896    |
| MV_Schw | C | 2474 | 54  | 3  | 0.480219983992261    |
| MV_Schw | T | 2475 | 31  | 2  | 0.428411386231373    |
| MV_Schw | T | 2476 | 17  | 1  | 0.983041048229953    |
| MV_Schw | C | 2477 | 300 | 13 | 0.0666530655058788   |
| MV_Schw | C | 2478 | 105 | 7  | 0.0321952249600374   |
| MV_Schw | G | 2479 | 719 | 22 | 0.252703073422297    |
| MV_Schw | G | 2480 | 101 | 5  | 0.146929120979630    |
| MV_Schw | G | 2481 | 165 | 9  | 0.0362654167957088   |
| MV_Schw | A | 2482 | 4   | 0  | 1                    |

|         |   |      |     |    |                      |
|---------|---|------|-----|----|----------------------|
| MV_Schw | C | 2483 | 85  | 3  | 0.691829352390927    |
| MV_Schw | A | 2484 | 4   | 1  | 0.136107188572645    |
| MV_Schw | C | 2485 | 14  | 1  | 0.944879389258477    |
| MV_Schw | C | 2486 | 23  | 2  | 0.296710762771661    |
| MV_Schw | C | 2487 | 23  | 2  | 0.296710762771661    |
| MV_Schw | A | 2488 | 64  | 1  | 1                    |
| MV_Schw | T | 2489 | 31  | 2  | 0.428411386231373    |
| MV_Schw | T | 2490 | 66  | 1  | 1                    |
| MV_Schw | A | 2491 | 122 | 7  | 0.0310014318320891   |
| MV_Schw | A | 2492 | 56  | 0  | 0.950262622850522    |
| MV_Schw | A | 2493 | 21  | 1  | 0.632968068765344    |
| MV_Schw | A | 2494 | 72  | 5  | 0.0351480920501204   |
| MV_Schw | A | 2495 | 79  | 7  | 0.0064632954085179   |
| MV_Schw | G | 2496 | 76  | 2  | 1                    |
| MV_Schw | G | 2497 | 60  | 8  | 5.28709218666075e-05 |
| MV_Schw | G | 2498 | 39  | 1  | 0.9314909603024      |
| MV_Schw | C | 2499 | 120 | 7  | 0.0656482349482676   |
| MV_Schw | A | 2500 | 50  | 4  | 0.0738869581900653   |
| MV_Schw | C | 2501 | 85  | 9  | 0.000223923583534798 |
| MV_Schw | A | 2502 | 37  | 1  | 0.88950624150852     |
| MV_Schw | G | 2503 | 64  | 2  | 1                    |
| MV_Schw | A | 2504 | 48  | 2  | 0.709032941865358    |
| MV_Schw | C | 2505 | 421 | 22 | 0.000108247885682625 |
| MV_Schw | G | 2506 | 645 | 18 | 0.558793747131741    |
| MV_Schw | C | 2507 | 43  | 0  | 1                    |
| MV_Schw | G | 2508 | 138 | 5  | 0.717634251494108    |
| MV_Schw | A | 2509 | 17  | 0  | 1                    |
| MV_Schw | G | 2510 | 180 | 3  | 1                    |
| MV_Schw | A | 2511 | 58  | 1  | 1                    |
| MV_Schw | T | 2512 | 17  | 1  | 0.983041048229953    |
| MV_Schw | T | 2513 | 8   | 0  | 1                    |
| MV_Schw | A | 2514 | 10  | 0  | 1                    |
| MV_Schw | G | 2515 | 50  | 1  | 1                    |
| MV_Schw | C | 2516 | 48  | 1  | 1                    |
| MV_Schw | C | 2517 | 289 | 11 | 0.255542871370563    |
| MV_Schw | T | 2518 | 2   | 0  | 1                    |

|         |   |      |     |    |                     |   |
|---------|---|------|-----|----|---------------------|---|
| MV_Schw | C | 2519 | 17  | 0  |                     | 1 |
| MV_Schw | A | 2520 | 25  | 1  | 0.704667204683568   |   |
| MV_Schw | T | 2521 | 68  | 3  | 0.806176178462968   |   |
| MV_Schw | T | 2522 | 66  | 1  |                     | 1 |
| MV_Schw | T | 2523 | 27  | 1  |                     | 1 |
| MV_Schw | G | 2524 | 56  | 1  |                     | 1 |
| MV_Schw | G | 2525 | 19  | 1  |                     | 1 |
| MV_Schw | A | 2526 | 95  | 2  |                     | 1 |
| MV_Schw | A | 2527 | 31  | 3  | 0.0518737301478137  |   |
| MV_Schw | C | 2528 | 401 | 8  |                     | 1 |
| MV_Schw | G | 2529 | 52  | 1  |                     | 1 |
| MV_Schw | G | 2530 | 68  | 4  | 0.189817598380461   |   |
| MV_Schw | A | 2531 | 37  | 1  |                     | 1 |
| MV_Schw | G | 2532 | 283 | 13 | 0.0212214795290776  |   |
| MV_Schw | A | 2533 | 151 | 3  |                     | 1 |
| MV_Schw | T | 2534 | 41  | 4  | 0.0352099055398472  |   |
| MV_Schw | C | 2535 | 428 | 7  |                     | 1 |
| MV_Schw | G | 2536 | 37  | 2  | 0.528591092326266   |   |
| MV_Schw | C | 2537 | 174 | 7  | 0.211393512474581   |   |
| MV_Schw | G | 2538 | 281 | 13 | 0.0206983380987818  |   |
| MV_Schw | T | 2539 | 99  | 2  |                     | 1 |
| MV_Schw | C | 2540 | 328 | 7  |                     | 1 |
| MV_Schw | T | 2541 | 35  | 1  |                     | 1 |
| MV_Schw | T | 2542 | 17  | 1  | 0.528591092326266   |   |
| MV_Schw | T | 2543 | 97  | 3  | 0.78354985902497    |   |
| MV_Schw | A | 2544 | 87  | 4  | 0.353841594200757   |   |
| MV_Schw | T | 2545 | 45  | 1  |                     | 1 |
| MV_Schw | T | 2546 | 141 | 3  |                     | 1 |
| MV_Schw | G | 2547 | 132 | 3  |                     | 1 |
| MV_Schw | A | 2548 | 14  | 0  |                     | 1 |
| MV_Schw | C | 2549 | 147 | 4  |                     | 1 |
| MV_Schw | A | 2550 | 89  | 5  | 0.090192830807046   |   |
| MV_Schw | G | 2551 | 54  | 1  |                     | 1 |
| MV_Schw | G | 2552 | 95  | 5  | 0.244569722692791   |   |
| MV_Schw | T | 2553 | 17  | 0  |                     | 1 |
| MV_Schw | G | 2554 | 95  | 7  | 0.00633833478123727 |   |



|         |   |      |      |    |                     |
|---------|---|------|------|----|---------------------|
| MV_Schw | G | 2555 | 711  | 25 | 0.0263623184273038  |
| MV_Schw | T | 2556 | 105  | 1  | 1                   |
| MV_Schw | G | 2557 | 281  | 5  | 1                   |
| MV_Schw | C | 2558 | 184  | 10 | 0.0161017557873181  |
| MV_Schw | A | 2559 | 72   | 0  | 0.791667533131283   |
| MV_Schw | A | 2560 | 153  | 5  | 0.619556855087002   |
| MV_Schw | C | 2561 | 180  | 8  | 0.138076942868576   |
| MV_Schw | C | 2562 | 566  | 23 | 0.008425995471388   |
| MV_Schw | C | 2563 | 186  | 8  | 0.157850676846273   |
| MV_Schw | A | 2564 | 31   | 0  | 1                   |
| MV_Schw | A | 2565 | 219  | 11 | 0.0330179720013107  |
| MV_Schw | T | 2566 | 43   | 3  | 0.12801336938299    |
| MV_Schw | G | 2567 | 169  | 5  | 0.789229943133706   |
| MV_Schw | T | 2568 | 14   | 1  | 0.426789350155389   |
| MV_Schw | G | 2569 | 72   | 5  | 0.094193442838711   |
| MV_Schw | C | 2570 | 603  | 24 | 0.00793670273477432 |
| MV_Schw | T | 2571 | 331  | 9  | 0.789229943133706   |
| MV_Schw | C | 2572 | 225  | 5  | 1                   |
| MV_Schw | G | 2573 | 302  | 11 | 0.285257240518862   |
| MV_Schw | A | 2574 | 25   | 0  | 1                   |
| MV_Schw | A | 2575 | 47   | 3  | 0.366637777073510   |
| MV_Schw | A | 2576 | 109  | 2  | 1                   |
| MV_Schw | G | 2577 | 205  | 11 | 0.0075030569181953  |
| MV_Schw | T | 2578 | 17   | 1  | 0.983041048229953   |
| MV_Schw | C | 2579 | 48   | 3  | 0.390345857720356   |
| MV_Schw | A | 2580 | 341  | 15 | 0.0131158463308656  |
| MV_Schw | C | 2581 | 322  | 16 | 0.00306787883708183 |
| MV_Schw | C | 2582 | 48   | 1  | 1                   |
| MV_Schw | C | 2583 | 548  | 18 | 0.185966477105392   |
| MV_Schw | T | 2584 | 58   | 1  | 1                   |
| MV_Schw | C | 2585 | 110  | 1  | 1                   |
| MV_Schw | G | 2586 | 223  | 7  | 0.788293646497135   |
| MV_Schw | G | 2587 | 1126 | 39 | 0.00394668764037222 |
| MV_Schw | A | 2588 | 74   | 3  | 0.831755077907185   |
| MV_Schw | A | 2589 | 50   | 1  | 1                   |
| MV_Schw | C | 2590 | 97   | 5  | 0.125475779768559   |

|         |    |      |      |    |                      |
|---------|----|------|------|----|----------------------|
| MV_Schw | C  | 2591 | 31   | 1  | 0.791667533131283    |
| MV_Schw | A  | 2592 | 95   | 2  | 1                    |
| MV_Schw | T  | 2593 | 47   | 2  | 0.678058690427187    |
| MV_Schw | C  | 2594 | 138  | 2  | 1                    |
| MV_Schw | A  | 2595 | 47   | 1  | 1                    |
| MV_Schw | G  | 2596 | 174  | 7  | 0.387724101345207    |
| MV_Schw | G  | 2597 | 95   | 5  | 0.244569722692791    |
| MV_Schw | G  | 2598 | 1157 | 57 | 4.71610980203e-10    |
| MV_Schw | C  | 2599 | 99   | 4  | 0.560243889454362    |
| MV_Schw | C  | 2600 | 99   | 3  | 1                    |
| MV_Schw | A  | 2601 | 52   | 3  | 0.221031331031110    |
| MV_Schw | G  | 2602 | 194  | 14 | 7.27469006939673e-05 |
| MV_Schw | G  | 2603 | 128  | 5  | 0.678806985357928    |
| MV_Schw | T  | 2604 | 112  | 2  | 1                    |
| MV_Schw | G  | 2605 | 78   | 3  | 0.863499923807603    |
| MV_Schw | C  | 2606 | 39   | 1  | 1                    |
| MV_Schw | A  | 2607 | 52   | 0  | 0.950262622850522    |
| MV_Schw | C  | 2608 | 114  | 3  | 0.953489044526869    |
| MV_Schw | C  | 2609 | 43   | 1  | 0.950262622850522    |
| MV_Schw | T  | 2610 | 35   | 3  | 0.0735418108684054   |
| MV_Schw | G  | 2611 | 128  | 3  | 1                    |
| MV_Schw | C  | 2612 | 128  | 4  | 0.840295409296105    |
| MV_Schw | G  | 2613 | 1227 | 41 | 0.00667545651171565  |
| MV_Schw | G  | 2614 | 190  | 5  | 0.950262622850522    |
| MV_Schw | G  | 2615 | 308  | 12 | 0.116489851723306    |
| MV_Schw | G  | 2616 | 54   | 6  | 0.00240123512054746  |
| MV_Schw | A  | 2617 | 16   | 0  | 1                    |
| MV_Schw | A  | 2618 | 43   | 1  | 0.950262622850522    |
| MV_Schw | T  | 2619 | 23   | 2  | 0.296710762771661    |
| MV_Schw | G  | 2620 | 95   | 3  | 1                    |
| MV_Schw | NA | 2621 | 0    | 0  | NA                   |
| MV_Schw | C  | 2622 | 91   | 2  | 1                    |
| MV_Schw | C  | 2623 | 370  | 17 | 0.0111413031107749   |
| MV_Schw | C  | 2624 | 171  | 6  | 0.52558001665221     |
| MV_Schw | C  | 2625 | 320  | 9  | 0.88950624150852     |
| MV_Schw | G  | 2626 | 138  | 2  | 1                    |

|         |   |      |     |    |                    |   |
|---------|---|------|-----|----|--------------------|---|
| MV_Schw | A | 2627 | 17  | 0  |                    | 1 |
| MV_Schw | G | 2628 | 126 | 1  |                    | 1 |
| MV_Schw | T | 2629 | 47  | 2  | 0.678058690427187  |   |
| MV_Schw | G | 2630 | 107 | 3  |                    | 1 |
| MV_Schw | T | 2631 | 16  | 0  |                    | 1 |
| MV_Schw | G | 2632 | 198 | 3  |                    | 1 |
| MV_Schw | T | 2633 | 70  | 1  |                    | 1 |
| MV_Schw | G | 2634 | 550 | 11 |                    | 1 |
| MV_Schw | A | 2635 | 27  | 1  | 0.752394317790241  |   |
| MV_Schw | G | 2636 | 409 | 11 | 0.789229943133706  |   |
| MV_Schw | C | 2637 | 207 | 3  |                    | 1 |
| MV_Schw | A | 2638 | 60  | 1  |                    | 1 |
| MV_Schw | A | 2639 | 23  | 0  |                    | 1 |
| MV_Schw | T | 2640 | 87  | 2  |                    | 1 |
| MV_Schw | G | 2641 | 145 | 2  |                    | 1 |
| MV_Schw | C | 2642 | 103 | 3  |                    | 1 |
| MV_Schw | C | 2643 | 198 | 4  |                    | 1 |
| MV_Schw | G | 2644 | 295 | 12 | 0.094193442838711  |   |
| MV_Schw | C | 2645 | 490 | 17 | 0.183726583742442  |   |
| MV_Schw | A | 2646 | 93  | 4  | 0.532185081645424  |   |
| MV_Schw | C | 2647 | 219 | 8  | 0.383757529764604  |   |
| MV_Schw | T | 2648 | 14  | 0  |                    | 1 |
| MV_Schw | G | 2649 | 33  | 1  | 0.822598489333375  |   |
| MV_Schw | A | 2650 | 27  | 1  |                    | 1 |
| MV_Schw | T | 2651 | 83  | 2  |                    | 1 |
| MV_Schw | A | 2652 | 79  | 4  | 0.294236275018498  |   |
| MV_Schw | C | 2653 | 145 | 3  |                    | 1 |
| MV_Schw | A | 2654 | 8   | 1  | 0.258627633593378  |   |
| MV_Schw | G | 2655 | 89  | 4  | 0.372808321584263  |   |
| MV_Schw | G | 2656 | 190 | 10 | 0.0205159345676087 |   |
| MV_Schw | A | 2657 | 33  | 3  | 0.197209929577240  |   |
| MV_Schw | G | 2658 | 198 | 12 | 0.0020764131095319 |   |
| MV_Schw | T | 2659 | 56  | 1  |                    | 1 |
| MV_Schw | G | 2660 | 203 | 9  | 0.176665674313972  |   |
| MV_Schw | G | 2661 | 72  | 4  | 0.222002676269896  |   |
| MV_Schw | A | 2662 | 19  | 0  |                    | 1 |

|         |   |      |     |    |                      |
|---------|---|------|-----|----|----------------------|
| MV_Schw | C | 2663 | 393 | 19 | 0.00218193024756921  |
| MV_Schw | A | 2664 | 8   | 1  | 0.258627633593378    |
| MV_Schw | C | 2665 | 523 | 25 | 0.000278514956576216 |
| MV_Schw | C | 2666 | 114 | 1  | 1                    |
| MV_Schw | C | 2667 | 157 | 1  | 0.88950624150852     |
| MV_Schw | G | 2668 | 659 | 18 | 0.641206907593324    |
| MV_Schw | A | 2669 | 85  | 3  | 0.691829352390927    |
| MV_Schw | A | 2670 | 250 | 11 | 0.0887977744330375   |
| MV_Schw | T | 2671 | 66  | 1  | 1                    |
| MV_Schw | C | 2672 | 66  | 1  | 1                    |
| MV_Schw | T | 2673 | 31  | 1  | 1                    |
| MV_Schw | G | 2674 | 120 | 1  | 0.789229943133706    |
| MV_Schw | G | 2675 | 620 | 19 | 0.334738308726434    |
| MV_Schw | T | 2676 | 45  | 2  | 0.65158773158174     |
| MV_Schw | A | 2677 | 19  | 1  | 1                    |
| MV_Schw | C | 2678 | 176 | 9  | 0.0735589343444043   |
| MV_Schw | C | 2679 | 52  | 0  | 0.950262622850522    |
| MV_Schw | A | 2680 | 17  | 0  | 1                    |
| MV_Schw | C | 2681 | 140 | 4  | 1                    |
| MV_Schw | A | 2682 | 101 | 2  | 1                    |
| MV_Schw | A | 2683 | 58  | 1  | 1                    |
| MV_Schw | T | 2684 | 16  | 0  | 1                    |
| MV_Schw | C | 2685 | 91  | 4  | 0.5275876261426      |
| MV_Schw | T | 2686 | 10  | 0  | 1                    |
| MV_Schw | C | 2687 | 52  | 2  | 0.78354985902497     |
| MV_Schw | C | 2688 | 236 | 5  | 1                    |
| MV_Schw | C | 2689 | 601 | 10 | 1                    |
| MV_Schw | C | 2690 | 66  | 3  | 0.354972433257953    |
| MV_Schw | G | 2691 | 527 | 17 | 0.275821001292176    |
| MV_Schw | A | 2692 | 17  | 1  | 0.528591092326266    |
| MV_Schw | G | 2693 | 252 | 11 | 0.091305026877148    |
| MV_Schw | A | 2694 | 19  | 1  | 0.57780206681461     |
| MV_Schw | T | 2695 | 105 | 1  | 1                    |
| MV_Schw | C | 2696 | 6   | 0  | 1                    |
| MV_Schw | C | 2697 | 21  | 1  | 0.632968068765344    |
| MV_Schw | C | 2698 | 145 | 5  | 0.763221278146551    |

|         |   |      |     |    |                      |   |
|---------|---|------|-----|----|----------------------|---|
| MV_Schw | A | 2699 | 74  | 2  |                      | 1 |
| MV_Schw | G | 2700 | 734 | 29 | 0.00382879726107681  |   |
| MV_Schw | A | 2701 | 43  | 1  |                      | 1 |
| MV_Schw | A | 2702 | 25  | 0  |                      | 1 |
| MV_Schw | T | 2703 | 2   | 0  |                      | 1 |
| MV_Schw | A | 2704 | 4   | 0  |                      | 1 |
| MV_Schw | A | 2705 | 6   | 1  | 0.704667204683568    |   |
| MV_Schw | T | 2706 | 19  | 1  | 0.57780206681461     |   |
| MV_Schw | G | 2707 | 47  | 3  | 0.366637777073510    |   |
| MV_Schw | A | 2708 | 10  | 0  |                      | 1 |
| MV_Schw | A | 2709 | 12  | 1  | 0.88950624150852     |   |
| MV_Schw | G | 2710 | 143 | 7  | 0.074997775457354    |   |
| MV_Schw | A | 2711 | 2   | 1  | 0.491835918445353    |   |
| MV_Schw | A | 2712 | 8   | 1  | 0.789229943133706    |   |
| MV_Schw | G | 2713 | 128 | 6  | 0.245197580731582    |   |
| MV_Schw | G | 2714 | 91  | 7  | 0.0147022297036108   |   |
| MV_Schw | G | 2715 | 118 | 8  | 0.00964469469431374  |   |
| MV_Schw | G | 2716 | 205 | 7  | 0.475840536439377    |   |
| MV_Schw | G | 2717 | 99  | 3  |                      | 1 |
| MV_Schw | A | 2718 | 45  | 4  | 0.0485139564708208   |   |
| MV_Schw | G | 2719 | 105 | 10 | 9.68576243654903e-05 |   |
| MV_Schw | A | 2720 | 21  | 3  | 0.0746595992424665   |   |
| MV_Schw | C | 2721 | 227 | 19 | 2.29242160974908e-07 |   |
| MV_Schw | T | 2722 | 31  | 2  | 0.428411386231373    |   |
| MV_Schw | A | 2723 | 163 | 7  | 0.275653222293987    |   |
| MV_Schw | T | 2724 | 116 | 9  | 0.0029181905899106   |   |
| MV_Schw | T | 2725 | 43  | 2  | 0.632968068765344    |   |
| MV_Schw | A | 2726 | 186 | 9  | 0.0510722982649017   |   |
| MV_Schw | T | 2727 | 558 | 24 | 0.00207606777490774  |   |
| MV_Schw | G | 2728 | 58  | 1  |                      | 1 |
| MV_Schw | A | 2729 | 93  | 5  | 0.230316890082773    |   |
| MV_Schw | T | 2730 | 360 | 15 | 0.0559946103775228   |   |
| MV_Schw | G | 2731 | 114 | 3  |                      | 1 |
| MV_Schw | A | 2732 | 105 | 5  | 0.414034029869785    |   |
| MV_Schw | T | 2733 | 81  | 1  |                      | 1 |
| MV_Schw | G | 2734 | 262 | 7  |                      | 1 |

|         |   |      |     |   |                    |
|---------|---|------|-----|---|--------------------|
| MV_Schw | A | 2735 | 56  | 2 | 0.968890372475178  |
| MV_Schw | G | 2736 | 153 | 9 | 0.0225204890868346 |
| MV_Schw | C | 2737 | 140 | 6 | 0.294236275018498  |
| MV_Schw | T | 2738 | 33  | 3 | 0.0621625989443951 |
| MV_Schw | G | 2739 | 178 | 5 | 0.804012574266476  |
| MV_Schw | T | 2740 | 10  | 0 | 1                  |
| MV_Schw | T | 2741 | 10  | 0 | 1                  |
| MV_Schw | C | 2742 | 388 | 7 | 1                  |
| MV_Schw | T | 2743 | 6   | 1 | 0.704667204683568  |
| MV_Schw | C | 2744 | 273 | 5 | 1                  |
| MV_Schw | T | 2745 | 37  | 0 | 1                  |
| MV_Schw | G | 2746 | 74  | 1 | 1                  |
| MV_Schw | A | 2747 | 4   | 0 | 1                  |
| MV_Schw | T | 2748 | 6   | 0 | 1                  |
| MV_Schw | G | 2749 | 27  | 1 | 1                  |
| MV_Schw | T | 2750 | 2   | 0 | 1                  |
| MV_Schw | C | 2751 | 103 | 3 | 1                  |
| MV_Schw | C | 2752 | 91  | 5 | 0.217911555108928  |
| MV_Schw | A | 2753 | 112 | 2 | 1                  |
| MV_Schw | A | 2754 | 54  | 3 | 0.237817203872315  |
| MV_Schw | G | 2755 | 103 | 7 | 0.0290526919708477 |
| MV_Schw | A | 2756 | 12  | 1 | 0.88950624150852   |
| MV_Schw | T | 2757 | 21  | 3 | 0.0171246304850916 |
| MV_Schw | A | 2758 | 171 | 6 | 0.52558001665221   |
| MV_Schw | T | 2759 | 43  | 1 | 1                  |
| MV_Schw | T | 2760 | 14  | 0 | 1                  |
| MV_Schw | A | 2761 | 27  | 2 | 0.355295708921217  |
| MV_Schw | A | 2762 | 70  | 1 | 1                  |
| MV_Schw | A | 2763 | 31  | 1 | 1                  |
| MV_Schw | A | 2764 | 60  | 5 | 0.0479728580883292 |
| MV_Schw | C | 2765 | 93  | 6 | 0.0445795746199782 |
| MV_Schw | A | 2766 | 0   | 1 | 0.307480793677112  |
| MV_Schw | G | 2767 | 62  | 1 | 1                  |
| MV_Schw | C | 2768 | 41  | 1 | 1                  |
| MV_Schw | C | 2769 | 110 | 5 | 0.44055837109039   |
| MV_Schw | T | 2770 | 0   | 0 | 1                  |

|         |   |      |     |    |                      |
|---------|---|------|-----|----|----------------------|
| MV_Schw | T | 2771 | 12  | 0  | 1                    |
| MV_Schw | G | 2772 | 130 | 3  | 1                    |
| MV_Schw | G | 2773 | 45  | 1  | 1                    |
| MV_Schw | C | 2774 | 310 | 9  | 0.658415249679101    |
| MV_Schw | C | 2775 | 87  | 3  | 0.935220820395243    |
| MV_Schw | A | 2776 | 70  | 1  | 1                    |
| MV_Schw | A | 2777 | 54  | 3  | 0.480219983992261    |
| MV_Schw | A | 2778 | 54  | 1  | 1                    |
| MV_Schw | A | 2779 | 45  | 1  | 1                    |
| MV_Schw | T | 2780 | 198 | 6  | 0.82920869837831     |
| MV_Schw | A | 2781 | 6   | 0  | 1                    |
| MV_Schw | C | 2782 | 141 | 6  | 0.298485329352986    |
| MV_Schw | A | 2783 | 47  | 1  | 1                    |
| MV_Schw | C | 2784 | 132 | 4  | 0.863499923807603    |
| MV_Schw | G | 2785 | 58  | 4  | 0.118907467124559    |
| MV_Schw | A | 2786 | 8   | 0  | 1                    |
| MV_Schw | G | 2787 | 291 | 16 | 0.000782942784018016 |
| MV_Schw | G | 2788 | 21  | 1  | 1                    |
| MV_Schw | A | 2789 | 66  | 2  | 1                    |
| MV_Schw | T | 2790 | 12  | 1  | 0.88950624150852     |
| MV_Schw | A | 2791 | 25  | 0  | 1                    |
| MV_Schw | A | 2792 | 66  | 2  | 1                    |
| MV_Schw | T | 2793 | 85  | 1  | 1                    |
| MV_Schw | C | 2794 | 118 | 4  | 0.804012640024926    |
| MV_Schw | A | 2795 | 89  | 1  | 1                    |
| MV_Schw | G | 2796 | 105 | 1  | 1                    |
| MV_Schw | A | 2797 | 48  | 1  | 1                    |
| MV_Schw | A | 2798 | 105 | 5  | 0.414034029869785    |
| MV_Schw | G | 2799 | 66  | 1  | 1                    |
| MV_Schw | A | 2800 | 70  | 7  | 0.00285138621958343  |
| MV_Schw | T | 2801 | 25  | 3  | 0.110260611333144    |
| MV_Schw | A | 2802 | 19  | 1  | 0.57780206681461     |
| MV_Schw | A | 2803 | 29  | 1  | 0.789229943133706    |
| MV_Schw | T | 2804 | 31  | 1  | 1                    |
| MV_Schw | C | 2805 | 256 | 13 | 0.0131040780293563   |
| MV_Schw | T | 2806 | 23  | 1  | 1                    |

|         |   |      |      |    |                      |   |
|---------|---|------|------|----|----------------------|---|
| MV_Schw | C | 2807 | 143  | 4  |                      | 1 |
| MV_Schw | C | 2808 | 66   | 4  | 0.172896230358341    |   |
| MV_Schw | A | 2809 | 21   | 0  |                      | 1 |
| MV_Schw | A | 2810 | 31   | 1  |                      | 1 |
| MV_Schw | G | 2811 | 231  | 5  |                      | 1 |
| MV_Schw | C | 2812 | 107  | 1  | 0.945767847051808    |   |
| MV_Schw | T | 2813 | 27   | 0  |                      | 1 |
| MV_Schw | A | 2814 | 14   | 1  | 0.944879389258477    |   |
| MV_Schw | G | 2815 | 130  | 2  |                      | 1 |
| MV_Schw | A | 2816 | 89   | 1  |                      | 1 |
| MV_Schw | A | 2817 | 33   | 3  | 0.197209929577240    |   |
| MV_Schw | T | 2818 | 27   | 1  |                      | 1 |
| MV_Schw | C | 2819 | 78   | 3  | 0.863499923807603    |   |
| MV_Schw | A | 2820 | 16   | 0  |                      | 1 |
| MV_Schw | C | 2821 | 141  | 11 | 0.000566959006466571 |   |
| MV_Schw | T | 2822 | 85   | 7  | 0.00304912903726012  |   |
| MV_Schw | G | 2823 | 54   | 6  | 0.00240123512054746  |   |
| MV_Schw | C | 2824 | 161  | 3  |                      | 1 |
| MV_Schw | T | 2825 | 33   | 1  | 0.822598489333375    |   |
| MV_Schw | G | 2826 | 39   | 3  | 0.273798916014578    |   |
| MV_Schw | T | 2827 | 12   | 0  |                      | 1 |
| MV_Schw | T | 2828 | 14   | 0  |                      | 1 |
| MV_Schw | A | 2829 | 64   | 7  | 0.000394673874468293 |   |
| MV_Schw | T | 2830 | 25   | 1  |                      | 1 |
| MV_Schw | T | 2831 | 78   | 5  | 0.0496502660885715   |   |
| MV_Schw | G | 2832 | 99   | 7  | 0.0233447269367489   |   |
| MV_Schw | A | 2833 | 16   | 0  |                      | 1 |
| MV_Schw | A | 2834 | 27   | 6  | 3.95710195870273e-05 |   |
| MV_Schw | G | 2835 | 171  | 15 | 1.09420757799632e-06 |   |
| MV_Schw | G | 2836 | 180  | 4  |                      | 1 |
| MV_Schw | G | 2837 | 1079 | 41 | 0.000270696023130004 |   |
| MV_Schw | A | 2838 | 31   | 1  |                      | 1 |
| MV_Schw | G | 2839 | 198  | 14 | 9.39590829863593e-05 |   |
| MV_Schw | A | 2840 | 76   | 9  | 7.83469436305782e-05 |   |
| MV_Schw | A | 2841 | 184  | 8  | 0.151070769951824    |   |
| MV_Schw | G | 2842 | 719  | 53 | 1.79184922041329e-17 |   |



|         |   |      |     |    |                      |
|---------|---|------|-----|----|----------------------|
| MV_Schw | T | 2843 | 12  | 1  | 0.366832525336205    |
| MV_Schw | T | 2844 | 72  | 2  | 1                    |
| MV_Schw | G | 2845 | 153 | 9  | 0.0225204890868346   |
| MV_Schw | A | 2846 | 151 | 9  | 0.00831570447686393  |
| MV_Schw | G | 2847 | 678 | 60 | 1.41140448147795e-24 |
| MV_Schw | T | 2848 | 16  | 0  | 1                    |
| MV_Schw | C | 2849 | 202 | 16 | 4.02890943386424e-06 |
| MV_Schw | A | 2850 | 101 | 6  | 0.0648814214217677   |
| MV_Schw | A | 2851 | 76  | 5  | 0.0447617119591361   |
| MV_Schw | T | 2852 | 273 | 27 | 2.69042649153028e-12 |
| MV_Schw | T | 2853 | 324 | 21 | 5.51408519055352e-06 |
| MV_Schw | A | 2854 | 64  | 6  | 0.00616503932535731  |
| MV_Schw | A | 2855 | 6   | 0  | 1                    |
| MV_Schw | G | 2856 | 182 | 11 | 0.00240123512054746  |
| MV_Schw | A | 2857 | 188 | 11 | 0.0032574024146735   |
| MV_Schw | A | 2858 | 297 | 22 | 1.15105071239364e-07 |
| MV_Schw | G | 2859 | 213 | 16 | 9.42577167909893e-06 |
| MV_Schw | C | 2860 | 110 | 3  | 0.950262622850522    |
| MV_Schw | A | 2861 | 25  | 2  | 0.314611398059001    |
| MV_Schw | G | 2862 | 174 | 9  | 0.071237197691116    |
| MV_Schw | A | 2863 | 35  | 1  | 0.863499923807603    |
| MV_Schw | T | 2864 | 60  | 5  | 0.0479728580883292   |
| MV_Schw | C | 2865 | 484 | 20 | 0.0121366800018145   |
| MV_Schw | A | 2866 | 25  | 4  | 0.00602473798114441  |
| MV_Schw | A | 2867 | 17  | 1  | 0.983041048229953    |
| MV_Schw | C | 2868 | 91  | 3  | 0.734151152837751    |
| MV_Schw | A | 2869 | 128 | 11 | 5.82998257811994e-05 |
| MV_Schw | G | 2870 | 56  | 4  | 0.106459164393546    |
| MV_Schw | G | 2871 | 783 | 19 | 0.918413562411569    |
| MV_Schw | C | 2872 | 411 | 13 | 0.499662168427985    |
| MV_Schw | A | 2873 | 273 | 10 | 0.307085127613128    |
| MV_Schw | A | 2874 | 19  | 3  | 0.0128442841311504   |
| MV_Schw | A | 2875 | 89  | 1  | 1                    |
| MV_Schw | A | 2876 | 23  | 1  | 1                    |
| MV_Schw | T | 2877 | 122 | 4  | 0.822598489333375    |
| MV_Schw | A | 2878 | 66  | 4  | 0.172896230358341    |

|         |   |      |     |    |                      |   |
|---------|---|------|-----|----|----------------------|---|
| MV_Schw | T | 2879 | 211 | 5  |                      | 1 |
| MV_Schw | C | 2880 | 211 | 6  | 0.875812649023012    |   |
| MV_Schw | A | 2881 | 574 | 27 | 7.91695442041413e-05 |   |
| MV_Schw | G | 2882 | 254 | 11 | 0.0944477714354264   |   |
| MV_Schw | C | 2883 | 79  | 2  |                      | 1 |
| MV_Schw | A | 2884 | 45  | 2  | 0.65158773158174     |   |
| MV_Schw | T | 2885 | 70  | 5  | 0.0854785497754524   |   |
| MV_Schw | A | 2886 | 93  | 4  | 0.532185081645424    |   |
| MV_Schw | T | 2887 | 41  | 2  | 0.599534349993353    |   |
| MV_Schw | C | 2888 | 291 | 9  | 0.759187081395848    |   |
| MV_Schw | C | 2889 | 83  | 5  | 0.0681932663887974   |   |
| MV_Schw | A | 2890 | 105 | 7  | 0.0321952249600374   |   |
| MV_Schw | C | 2891 | 76  | 3  | 0.849410970830975    |   |
| MV_Schw | C | 2892 | 250 | 15 | 0.000264791698893959 |   |
| MV_Schw | C | 2893 | 68  | 3  | 0.806176178462968    |   |
| MV_Schw | T | 2894 | 93  | 2  |                      | 1 |
| MV_Schw | G | 2895 | 145 | 9  | 0.0157226578191689   |   |
| MV_Schw | G | 2896 | 492 | 11 |                      | 1 |
| MV_Schw | A | 2897 | 74  | 4  | 0.237817203872315    |   |
| MV_Schw | A | 2898 | 136 | 5  | 0.707150586447893    |   |
| MV_Schw | G | 2899 | 304 | 9  | 0.789229943133706    |   |
| MV_Schw | G | 2900 | 130 | 3  |                      | 1 |
| MV_Schw | A | 2901 | 16  | 2  | 0.157362228007976    |   |
| MV_Schw | C | 2902 | 372 | 11 | 0.750088853288595    |   |
| MV_Schw | A | 2903 | 87  | 4  | 0.353841594200757    |   |
| MV_Schw | C | 2904 | 74  | 4  | 0.237817203872315    |   |
| MV_Schw | C | 2905 | 147 | 10 | 0.00246574036722893  |   |
| MV_Schw | T | 2906 | 47  | 2  | 0.678058690427187    |   |
| MV_Schw | C | 2907 | 316 | 9  | 0.887930499252911    |   |
| MV_Schw | T | 2908 | 23  | 1  |                      | 1 |
| MV_Schw | C | 2909 | 403 | 6  |                      | 1 |
| MV_Schw | A | 2910 | 101 | 1  | 0.944879389258477    |   |
| MV_Schw | A | 2911 | 116 | 1  | 0.789229943133706    |   |
| MV_Schw | G | 2912 | 178 | 5  |                      | 1 |
| MV_Schw | C | 2913 | 58  | 1  |                      | 1 |
| MV_Schw | A | 2914 | 58  | 1  |                      | 1 |

|         |   |      |     |    |                      |   |
|---------|---|------|-----|----|----------------------|---|
| MV_Schw | T | 2915 | 70  | 2  |                      | 1 |
| MV_Schw | C | 2916 | 58  | 1  |                      | 1 |
| MV_Schw | A | 2917 | 159 | 3  |                      | 1 |
| MV_Schw | T | 2918 | 27  | 0  |                      | 1 |
| MV_Schw | G | 2919 | 153 | 5  | 0.904674542662588    |   |
| MV_Schw | A | 2920 | 85  | 1  |                      | 1 |
| MV_Schw | T | 2921 | 87  | 1  |                      | 1 |
| MV_Schw | C | 2922 | 403 | 11 | 0.789229943133706    |   |
| MV_Schw | G | 2923 | 283 | 8  | 0.82920869837831     |   |
| MV_Schw | C | 2924 | 180 | 8  | 0.138076942868576    |   |
| MV_Schw | C | 2925 | 180 | 9  | 0.0310014318320891   |   |
| MV_Schw | A | 2926 | 184 | 7  | 0.307432508150825    |   |
| MV_Schw | T | 2927 | 33  | 0  |                      | 1 |
| MV_Schw | T | 2928 | 19  | 0  |                      | 1 |
| MV_Schw | C | 2929 | 70  | 0  | 0.789229943133706    |   |
| MV_Schw | C | 2930 | 157 | 3  |                      | 1 |
| MV_Schw | T | 2931 | 6   | 0  |                      | 1 |
| MV_Schw | G | 2932 | 190 | 3  |                      | 1 |
| MV_Schw | G | 2933 | 136 | 4  | 0.992435787288199    |   |
| MV_Schw | A | 2934 | 14  | 1  | 0.944879389258477    |   |
| MV_Schw | C | 2935 | 56  | 1  |                      | 1 |
| MV_Schw | T | 2936 | 12  | 0  |                      | 1 |
| MV_Schw | T | 2937 | 10  | 0  |                      | 1 |
| MV_Schw | G | 2938 | 74  | 5  | 0.039710340356837    |   |
| MV_Schw | G | 2939 | 60  | 3  | 0.298698990757132    |   |
| MV_Schw | G | 2940 | 463 | 15 | 0.322160746500389    |   |
| MV_Schw | A | 2941 | 52  | 1  |                      | 1 |
| MV_Schw | A | 2942 | 58  | 1  |                      | 1 |
| MV_Schw | G | 2943 | 47  | 2  | 0.678058690427187    |   |
| MV_Schw | G | 2944 | 33  | 3  | 0.0621625989443951   |   |
| MV_Schw | A | 2945 | 58  | 5  | 0.0423994114395508   |   |
| MV_Schw | T | 2946 | 58  | 5  | 0.0423994114395508   |   |
| MV_Schw | C | 2947 | 66  | 5  | 0.0239036682558459   |   |
| MV_Schw | C | 2948 | 134 | 7  | 0.111492774142499    |   |
| MV_Schw | C | 2949 | 678 | 34 | 1.86323578471708e-06 |   |
| MV_Schw | A | 2950 | 234 | 16 | 3.88557895983349e-05 |   |

|         |   |      |     |    |                      |
|---------|---|------|-----|----|----------------------|
| MV_Schw | A | 2951 | 469 | 42 | 1.48037975489921e-17 |
| MV_Schw | C | 2952 | 665 | 49 | 1.16887466617492e-16 |
| MV_Schw | G | 2953 | 291 | 29 | 2.55697955601269e-13 |
| MV_Schw | A | 2954 | 4   | 1  | 0.619556855087002    |
| MV_Schw | C | 2955 | 275 | 26 | 1.22196113850395e-11 |
| MV_Schw | C | 2956 | 50  | 3  | 0.199842243730937    |
| MV_Schw | C | 2957 | 64  | 7  | 0.000394673874468293 |
| MV_Schw | C | 2958 | 66  | 6  | 0.00731721341976711  |
| MV_Schw | A | 2959 | 79  | 9  | 0.00120993104572384  |
| MV_Schw | C | 2960 | 138 | 11 | 0.00129023199658521  |
| MV_Schw | T | 2961 | 107 | 5  | 0.181053376647436    |
| MV_Schw | G | 2962 | 64  | 3  | 0.331831159059729    |
| MV_Schw | C | 2963 | 428 | 23 | 6.60071132494796e-05 |
| MV_Schw | A | 2964 | 2   | 2  | 0.00855638557580657  |
| MV_Schw | G | 2965 | 107 | 5  | 0.181053376647436    |
| MV_Schw | A | 2966 | 29  | 2  | 0.389821719583598    |
| MV_Schw | T | 2967 | 16  | 2  | 0.157362228007976    |
| MV_Schw | G | 2968 | 205 | 12 | 0.00307237581011603  |
| MV_Schw | T | 2969 | 50  | 3  | 0.199842243730937    |
| MV_Schw | C | 2970 | 64  | 3  | 0.609091736782917    |
| MV_Schw | G | 2971 | 128 | 5  | 0.366637777073510    |
| MV_Schw | A | 2972 | 258 | 8  | 0.700988278624987    |
| MV_Schw | A | 2973 | 103 | 7  | 0.0106661616972403   |
| MV_Schw | A | 2974 | 136 | 4  | 0.992435787288199    |
| MV_Schw | T | 2975 | 72  | 4  | 0.222002676269896    |
| MV_Schw | C | 2976 | 43  | 3  | 0.308038546605154    |
| MV_Schw | A | 2977 | 8   | 0  | 1                    |
| MV_Schw | A | 2978 | 72  | 2  | 1                    |
| MV_Schw | T | 2979 | 72  | 1  | 1                    |
| MV_Schw | C | 2980 | 155 | 12 | 0.000147586293567482 |
| MV_Schw | C | 2981 | 68  | 4  | 0.189817598380461    |
| MV_Schw | C | 2982 | 37  | 2  | 0.528591092326266    |
| MV_Schw | G | 2983 | 109 | 5  | 0.432572187564338    |
| MV_Schw | A | 2984 | 409 | 14 | 0.21911639482908     |
| MV_Schw | C | 2985 | 320 | 29 | 3.82981550324929e-12 |
| MV_Schw | T | 2986 | 45  | 2  | 0.65158773158174     |

|         |   |      |     |    |                      |
|---------|---|------|-----|----|----------------------|
| MV_Schw | T | 2987 | 14  | 0  | 1                    |
| MV_Schw | G | 2988 | 72  | 3  | 0.42458526175556     |
| MV_Schw | A | 2989 | 8   | 1  | 0.789229943133706    |
| MV_Schw | A | 2990 | 140 | 10 | 0.00151232810689852  |
| MV_Schw | A | 2991 | 95  | 7  | 0.0187937969661973   |
| MV_Schw | C | 2992 | 386 | 25 | 4.39744188199435e-07 |
| MV_Schw | C | 2993 | 33  | 1  | 1                    |
| MV_Schw | C | 2994 | 47  | 3  | 0.366637777073510    |
| MV_Schw | A | 2995 | 320 | 20 | 1.20792199953885e-05 |
| MV_Schw | T | 2996 | 172 | 11 | 0.00139038337754433  |
| MV_Schw | C | 2997 | 85  | 3  | 0.691829352390927    |
| MV_Schw | A | 2998 | 14  | 0  | 1                    |
| MV_Schw | T | 2999 | 27  | 3  | 0.128277619623459    |
| MV_Schw | A | 3000 | 4   | 0  | 1                    |
| MV_Schw | G | 3001 | 186 | 4  | 1                    |
| MV_Schw | G | 3002 | 48  | 1  | 1                    |
| MV_Schw | C | 3003 | 355 | 7  | 1                    |
| MV_Schw | A | 3004 | 62  | 3  | 0.57780206681461     |
| MV_Schw | G | 3005 | 120 | 3  | 0.97940134364504     |
| MV_Schw | A | 3006 | 54  | 1  | 1                    |
| MV_Schw | G | 3007 | 74  | 4  | 0.237817203872315    |
| MV_Schw | A | 3008 | 27  | 3  | 0.0351423582402498   |
| MV_Schw | T | 3009 | 62  | 3  | 0.57780206681461     |
| MV_Schw | T | 3010 | 12  | 0  | 1                    |
| MV_Schw | C | 3011 | 37  | 0  | 1                    |
| MV_Schw | A | 3012 | 114 | 1  | 0.789229943133706    |
| MV_Schw | G | 3013 | 140 | 3  | 1                    |
| MV_Schw | G | 3014 | 248 | 7  | 0.939506000333287    |
| MV_Schw | C | 3015 | 78  | 4  | 0.275013872879573    |
| MV_Schw | C | 3016 | 419 | 14 | 0.286462760557962    |
| MV_Schw | G | 3017 | 37  | 1  | 0.88950624150852     |
| MV_Schw | A | 3018 | 17  | 1  | 0.983041048229953    |
| MV_Schw | G | 3019 | 97  | 3  | 0.78354985902497     |
| MV_Schw | C | 3020 | 62  | 3  | 0.57780206681461     |
| MV_Schw | A | 3021 | 10  | 1  | 0.822598489333375    |
| MV_Schw | C | 3022 | 50  | 0  | 0.950262622850522    |

|         |   |      |     |    |                      |
|---------|---|------|-----|----|----------------------|
| MV_Schw | T | 3023 | 4   | 0  | 1                    |
| MV_Schw | G | 3024 | 109 | 4  | 0.632968068765344    |
| MV_Schw | G | 3025 | 167 | 5  | 0.789229943133706    |
| MV_Schw | C | 3026 | 116 | 2  | 1                    |
| MV_Schw | C | 3027 | 132 | 4  | 0.863499923807603    |
| MV_Schw | G | 3028 | 48  | 1  | 1                    |
| MV_Schw | A | 3029 | 17  | 0  | 1                    |
| MV_Schw | A | 3030 | 58  | 1  | 1                    |
| MV_Schw | G | 3031 | 64  | 3  | 0.609091736782917    |
| MV_Schw | T | 3032 | 12  | 0  | 1                    |
| MV_Schw | T | 3033 | 27  | 1  | 1                    |
| MV_Schw | C | 3034 | 48  | 1  | 1                    |
| MV_Schw | T | 3035 | 62  | 3  | 0.57780206681461     |
| MV_Schw | C | 3036 | 256 | 8  | 0.696127168607554    |
| MV_Schw | A | 3037 | 126 | 3  | 1                    |
| MV_Schw | A | 3038 | 43  | 1  | 0.950262622850522    |
| MV_Schw | G | 3039 | 271 | 7  | 0.945767847051808    |
| MV_Schw | A | 3040 | 19  | 2  | 0.224063006917908    |
| MV_Schw | A | 3041 | 10  | 1  | 0.822598489333375    |
| MV_Schw | A | 3042 | 4   | 1  | 0.136107188572645    |
| MV_Schw | C | 3043 | 112 | 5  | 0.220821932547907    |
| MV_Schw | C | 3044 | 39  | 2  | 0.560243889454362    |
| MV_Schw | C | 3045 | 116 | 3  | 0.957721317456694    |
| MV_Schw | G | 3046 | 300 | 9  | 0.551026371204373    |
| MV_Schw | T | 3047 | 56  | 3  | 0.258627633593378    |
| MV_Schw | T | 3048 | 79  | 3  | 0.658415249679101    |
| MV_Schw | G | 3049 | 85  | 3  | 0.691829352390927    |
| MV_Schw | C | 3050 | 56  | 1  | 1                    |
| MV_Schw | C | 3051 | 54  | 1  | 1                    |
| MV_Schw | A | 3052 | 107 | 5  | 0.42458526175556     |
| MV_Schw | G | 3053 | 262 | 11 | 0.065823474494797    |
| MV_Schw | C | 3054 | 126 | 4  | 0.828135947034       |
| MV_Schw | C | 3055 | 174 | 9  | 0.071237197691116    |
| MV_Schw | G | 3056 | 281 | 21 | 3.78153217448578e-07 |
| MV_Schw | A | 3057 | 17  | 1  | 0.528591092326266    |
| MV_Schw | C | 3058 | 140 | 7  | 0.0646746182830778   |

|         |    |      |     |    |                      |
|---------|----|------|-----|----|----------------------|
| MV_Schw | A  | 3059 | 10  | 0  | 1                    |
| MV_Schw | A  | 3060 | 6   | 0  | 1                    |
| MV_Schw | C  | 3061 | 99  | 5  | 0.277229700444564    |
| MV_Schw | T  | 3062 | 4   | 1  | 0.136107188572645    |
| MV_Schw | C  | 3063 | 79  | 2  | 1                    |
| MV_Schw | C  | 3064 | 211 | 5  | 1                    |
| MV_Schw | A  | 3065 | 81  | 4  | 0.305908359426921    |
| MV_Schw | A  | 3066 | 45  | 3  | 0.144729111493106    |
| MV_Schw | G  | 3067 | 217 | 17 | 3.93362363047535e-06 |
| MV_Schw | G  | 3068 | 64  | 5  | 0.0208977336518193   |
| MV_Schw | A  | 3069 | 4   | 0  | 1                    |
| MV_Schw | A  | 3070 | 14  | 1  | 0.944879389258477    |
| MV_Schw | T  | 3071 | 81  | 4  | 0.305908359426921    |
| MV_Schw | G  | 3072 | 107 | 9  | 0.000428145602101406 |
| MV_Schw | NA | 3073 | 0   | 0  | NA                   |
| MV_Schw | C  | 3074 | 103 | 9  | 0.00107263798095381  |
| MV_Schw | A  | 3075 | 39  | 1  | 0.9314909603024      |
| MV_Schw | A  | 3076 | 35  | 3  | 0.222002676269896    |
| MV_Schw | A  | 3077 | 23  | 1  | 1                    |
| MV_Schw | T  | 3078 | 114 | 5  | 0.463720798159947    |
| MV_Schw | G  | 3079 | 287 | 9  | 0.522093657214649    |
| MV_Schw | G  | 3080 | 112 | 5  | 0.449295143732283    |
| MV_Schw | A  | 3081 | 23  | 0  | 1                    |
| MV_Schw | C  | 3082 | 306 | 7  | 1                    |
| MV_Schw | G  | 3083 | 74  | 2  | 1                    |
| MV_Schw | G  | 3084 | 64  | 1  | 1                    |
| MV_Schw | A  | 3085 | 62  | 4  | 0.144327963472984    |
| MV_Schw | C  | 3086 | 97  | 3  | 1                    |
| MV_Schw | C  | 3087 | 213 | 9  | 0.200025780103629    |
| MV_Schw | A  | 3088 | 8   | 1  | 0.258627633593378    |
| MV_Schw | G  | 3089 | 240 | 10 | 0.121832950892168    |
| MV_Schw | T  | 3090 | 52  | 4  | 0.0841644149519328   |
| MV_Schw | T  | 3091 | 52  | 1  | 1                    |
| MV_Schw | C  | 3092 | 172 | 3  | 1                    |
| MV_Schw | C  | 3093 | 248 | 7  | 0.939506000333287    |
| MV_Schw | A  | 3094 | 68  | 1  | 1                    |

|         |   |      |     |    |                    |
|---------|---|------|-----|----|--------------------|
| MV_Schw | G | 3095 | 378 | 17 | 0.0125644003428032 |
| MV_Schw | A | 3096 | 93  | 3  | 0.747390316041078  |
| MV_Schw | G | 3097 | 97  | 3  | 0.78354985902497   |
| MV_Schw | G | 3098 | 101 | 3  | 0.789229943133706  |
| MV_Schw | A | 3099 | 2   | 0  | 1                  |
| MV_Schw | C | 3100 | 258 | 9  | 0.296710762771661  |
| MV_Schw | A | 3101 | 48  | 1  | 1                  |
| MV_Schw | G | 3102 | 56  | 3  | 0.258627633593378  |
| MV_Schw | C | 3103 | 48  | 0  | 0.950262622850522  |
| MV_Schw | T | 3104 | 70  | 4  | 0.206412498777864  |
| MV_Schw | G | 3105 | 126 | 6  | 0.239137755983385  |
| MV_Schw | C | 3106 | 23  | 1  | 1                  |
| MV_Schw | T | 3107 | 35  | 1  | 1                  |
| MV_Schw | G | 3108 | 60  | 3  | 0.550155392537109  |
| MV_Schw | A | 3109 | 78  | 5  | 0.124962268582404  |
| MV_Schw | A | 3110 | 85  | 3  | 0.918952129071198  |
| MV_Schw | G | 3111 | 331 | 11 | 0.307480793677112  |
| MV_Schw | G | 3112 | 33  | 1  | 1                  |
| MV_Schw | A | 3113 | 4   | 0  | 1                  |
| MV_Schw | A | 3114 | 78  | 2  | 1                  |
| MV_Schw | T | 3115 | 35  | 1  | 0.863499923807603  |
| MV_Schw | T | 3116 | 70  | 3  | 0.395791012435089  |
| MV_Schw | T | 3117 | 6   | 0  | 1                  |
| MV_Schw | C | 3118 | 60  | 0  | 0.957721317456694  |
| MV_Schw | A | 3119 | 17  | 0  | 1                  |
| MV_Schw | G | 3120 | 60  | 2  | 0.983041048229953  |
| MV_Schw | C | 3121 | 70  | 1  | 1                  |
| MV_Schw | T | 3122 | 6   | 0  | 1                  |
| MV_Schw | A | 3123 | 10  | 0  | 1                  |
| MV_Schw | A | 3124 | 6   | 0  | 1                  |
| MV_Schw | A | 3125 | 54  | 1  | 1                  |
| MV_Schw | G | 3126 | 70  | 3  | 0.819327818667335  |
| MV_Schw | C | 3127 | 47  | 1  | 1                  |
| MV_Schw | C | 3128 | 89  | 3  | 0.715462436038866  |
| MV_Schw | G | 3129 | 56  | 1  | 1                  |
| MV_Schw | A | 3130 | 83  | 3  | 0.897349285586955  |



|         |   |      |     |    |                    |
|---------|---|------|-----|----|--------------------|
| MV_Schw | T | 3131 | 136 | 5  | 0.413972023083745  |
| MV_Schw | C | 3132 | 35  | 0  | 1                  |
| MV_Schw | G | 3133 | 52  | 1  | 1                  |
| MV_Schw | G | 3134 | 60  | 4  | 0.130118305522798  |
| MV_Schw | G | 3135 | 329 | 11 | 0.491835918445353  |
| MV_Schw | A | 3136 | 318 | 10 | 0.570479535773178  |
| MV_Schw | A | 3137 | 83  | 5  | 0.161503851613234  |
| MV_Schw | A | 3138 | 27  | 2  | 0.355295708921217  |
| MV_Schw | A | 3139 | 23  | 1  | 1                  |
| MV_Schw | A | 3140 | 62  | 4  | 0.144327963472984  |
| MV_Schw | G | 3141 | 186 | 5  | 1                  |
| MV_Schw | A | 3142 | 107 | 3  | 1                  |
| MV_Schw | T | 3143 | 163 | 6  | 0.491911563164373  |
| MV_Schw | G | 3144 | 58  | 3  | 0.528591092326266  |
| MV_Schw | A | 3145 | 12  | 0  | 1                  |
| MV_Schw | G | 3146 | 97  | 1  | 1                  |
| MV_Schw | C | 3147 | 380 | 15 | 0.0464133215936192 |
| MV_Schw | T | 3148 | 31  | 1  | 0.791667533131283  |
| MV_Schw | C | 3149 | 337 | 8  | 1                  |
| MV_Schw | A | 3150 | 41  | 1  | 1                  |
| MV_Schw | G | 3151 | 167 | 5  | 0.789229943133706  |
| MV_Schw | C | 3152 | 39  | 3  | 0.273798916014578  |
| MV_Schw | C | 3153 | 68  | 3  | 0.378469870290234  |
| MV_Schw | G | 3154 | 262 | 3  | 0.939895502513983  |
| MV_Schw | T | 3155 | 54  | 1  | 1                  |
| MV_Schw | C | 3156 | 244 | 3  | 0.789229943133706  |
| MV_Schw | G | 3157 | 227 | 5  | 1                  |
| MV_Schw | G | 3158 | 89  | 2  | 1                  |
| MV_Schw | G | 3159 | 159 | 4  | 1                  |
| MV_Schw | T | 3160 | 10  | 0  | 1                  |
| MV_Schw | T | 3161 | 16  | 0  | 1                  |
| MV_Schw | T | 3162 | 10  | 0  | 1                  |
| MV_Schw | G | 3163 | 95  | 1  | 1                  |
| MV_Schw | T | 3164 | 31  | 1  | 1                  |
| MV_Schw | T | 3165 | 74  | 3  | 0.44280652126772   |
| MV_Schw | C | 3166 | 140 | 1  | 0.986363032184908  |

|         |   |      |     |    |                      |   |
|---------|---|------|-----|----|----------------------|---|
| MV_Schw | C | 3167 | 266 | 5  |                      | 1 |
| MV_Schw | T | 3168 | 17  | 1  | 0.528591092326266    |   |
| MV_Schw | G | 3169 | 186 | 8  | 0.157850676846273    |   |
| MV_Schw | A | 3170 | 27  | 1  | 0.752394317790241    |   |
| MV_Schw | C | 3171 | 248 | 16 | 8.71118052628773e-05 |   |
| MV_Schw | A | 3172 | 29  | 1  | 0.789229943133706    |   |
| MV_Schw | C | 3173 | 62  | 3  | 0.57780206681461     |   |
| MV_Schw | C | 3174 | 153 | 3  |                      | 1 |
| MV_Schw | G | 3175 | 16  | 1  | 0.483965165529824    |   |
| MV_Schw | G | 3176 | 184 | 5  | 0.950262622850522    |   |
| MV_Schw | C | 3177 | 107 | 6  | 0.0845384262806547   |   |
| MV_Schw | C | 3178 | 120 | 6  | 0.141272812333231    |   |
| MV_Schw | C | 3179 | 47  | 1  |                      | 1 |
| MV_Schw | T | 3180 | 10  | 0  |                      | 1 |
| MV_Schw | G | 3181 | 78  | 5  | 0.0496502660885715   |   |
| MV_Schw | C | 3182 | 58  | 1  |                      | 1 |
| MV_Schw | A | 3183 | 64  | 1  |                      | 1 |
| MV_Schw | T | 3184 | 14  | 0  |                      | 1 |
| MV_Schw | C | 3185 | 66  | 3  | 0.354972433257953    |   |
| MV_Schw | A | 3186 | 27  | 0  |                      | 1 |
| MV_Schw | C | 3187 | 60  | 1  |                      | 1 |
| MV_Schw | G | 3188 | 37  | 3  | 0.245202640825390    |   |
| MV_Schw | C | 3189 | 215 | 5  |                      | 1 |
| MV_Schw | A | 3190 | 12  | 0  |                      | 1 |
| MV_Schw | G | 3191 | 66  | 5  | 0.0687939946138633   |   |
| MV_Schw | T | 3192 | 10  | 1  | 0.822598489333375    |   |
| MV_Schw | G | 3193 | 54  | 3  | 0.237817203872315    |   |
| MV_Schw | T | 3194 | 0   | 0  |                      | 1 |
| MV_Schw | A | 3195 | 16  | 1  | 0.483965165529824    |   |
| MV_Schw | A | 3196 | 116 | 5  | 0.308443216377307    |   |
| MV_Schw | T | 3197 | 50  | 0  | 0.950262622850522    |   |
| MV_Schw | C | 3198 | 83  | 4  | 0.311085536765447    |   |
| MV_Schw | C | 3199 | 103 | 7  | 0.0290526919708477   |   |
| MV_Schw | G | 3200 | 35  | 1  |                      | 1 |
| MV_Schw | C | 3201 | 725 | 23 | 0.136190697599112    |   |
| MV_Schw | T | 3202 | 122 | 1  |                      | 1 |

|         |   |      |     |    |                      |
|---------|---|------|-----|----|----------------------|
| MV_Schw | C | 3203 | 66  | 3  | 0.354972433257953    |
| MV_Schw | C | 3204 | 58  | 0  | 0.953489044526869    |
| MV_Schw | A | 3205 | 6   | 0  | 1                    |
| MV_Schw | T | 3206 | 0   | 1  | 0.307480793677112    |
| MV_Schw | T | 3207 | 16  | 1  | 0.950262622850522    |
| MV_Schw | A | 3208 | 74  | 1  | 1                    |
| MV_Schw | T | 3209 | 48  | 0  | 0.950262622850522    |
| MV_Schw | A | 3210 | 41  | 1  | 0.945767847051808    |
| MV_Schw | A | 3211 | 29  | 0  | 1                    |
| MV_Schw | A | 3212 | 50  | 1  | 1                    |
| MV_Schw | A | 3213 | 23  | 0  | 1                    |
| MV_Schw | T | 3214 | 126 | 3  | 1                    |
| MV_Schw | C | 3215 | 31  | 1  | 1                    |
| MV_Schw | C | 3216 | 225 | 7  | 0.641186461810141    |
| MV_Schw | A | 3217 | 48  | 3  | 0.390345857720356    |
| MV_Schw | G | 3218 | 548 | 11 | 1                    |
| MV_Schw | C | 3219 | 163 | 9  | 0.0147395035857537   |
| MV_Schw | C | 3220 | 43  | 0  | 1                    |
| MV_Schw | G | 3221 | 105 | 2  | 1                    |
| MV_Schw | G | 3222 | 68  | 3  | 0.806176178462968    |
| MV_Schw | C | 3223 | 229 | 6  | 0.983041048229953    |
| MV_Schw | T | 3224 | 35  | 1  | 0.863499923807603    |
| MV_Schw | A | 3225 | 16  | 0  | 1                    |
| MV_Schw | G | 3226 | 58  | 2  | 0.98139756833885     |
| MV_Schw | A | 3227 | 4   | 1  | 0.619556855087002    |
| MV_Schw | G | 3228 | 545 | 21 | 0.0153446284992890   |
| MV_Schw | G | 3229 | 140 | 5  | 0.560243889454362    |
| MV_Schw | A | 3230 | 10  | 1  | 0.822598489333375    |
| MV_Schw | G | 3231 | 176 | 7  | 0.29386516718128     |
| MV_Schw | G | 3232 | 95  | 6  | 0.0489145388312796   |
| MV_Schw | A | 3233 | 273 | 16 | 0.000341466020188633 |
| MV_Schw | T | 3234 | 190 | 5  | 1                    |
| MV_Schw | C | 3235 | 574 | 25 | 0.00100800897547879  |
| MV_Schw | G | 3236 | 829 | 31 | 0.00577918737222712  |
| MV_Schw | G | 3237 | 233 | 8  | 0.432397088700067    |
| MV_Schw | A | 3238 | 105 | 7  | 0.0321952249600374   |

|         |   |      |     |    |                      |
|---------|---|------|-----|----|----------------------|
| MV_Schw | A | 3239 | 227 | 13 | 0.00138700917665090  |
| MV_Schw | G | 3240 | 262 | 17 | 6.86164536611791e-05 |
| MV_Schw | C | 3241 | 184 | 14 | 3.75216585877020e-05 |
| MV_Schw | G | 3242 | 149 | 11 | 0.000311254487457699 |
| MV_Schw | T | 3243 | 25  | 3  | 0.110260611333144    |
| MV_Schw | T | 3244 | 107 | 2  | 1                    |
| MV_Schw | A | 3245 | 60  | 3  | 0.298698990757132    |
| MV_Schw | C | 3246 | 78  | 3  | 0.863499923807603    |
| MV_Schw | C | 3247 | 89  | 5  | 0.201986157592846    |
| MV_Schw | T | 3248 | 246 | 10 | 0.134919140758231    |
| MV_Schw | G | 3249 | 343 | 14 | 0.0500640177083729   |
| MV_Schw | A | 3250 | 35  | 1  | 0.863499923807603    |
| MV_Schw | T | 3251 | 324 | 11 | 0.386708260306915    |
| MV_Schw | G | 3252 | 45  | 4  | 0.0485139564708208   |
| MV_Schw | A | 3253 | 4   | 0  | 1                    |
| MV_Schw | C | 3254 | 213 | 9  | 0.130118305522798    |
| MV_Schw | T | 3255 | 12  | 0  | 1                    |
| MV_Schw | C | 3256 | 47  | 1  | 1                    |
| MV_Schw | T | 3257 | 25  | 0  | 1                    |
| MV_Schw | C | 3258 | 81  | 7  | 0.00750085134410674  |
| MV_Schw | C | 3259 | 176 | 8  | 0.126418646194306    |
| MV_Schw | T | 3260 | 23  | 0  | 1                    |
| MV_Schw | T | 3261 | 48  | 1  | 1                    |
| MV_Schw | G | 3262 | 62  | 4  | 0.144327963472984    |
| MV_Schw | A | 3263 | 54  | 2  | 0.789229943133706    |
| MV_Schw | T | 3264 | 31  | 2  | 0.428411386231373    |
| MV_Schw | G | 3265 | 8   | 1  | 0.789229943133706    |
| MV_Schw | A | 3266 | 2   | 0  | 1                    |
| MV_Schw | T | 3267 | 27  | 2  | 0.355295708921217    |
| MV_Schw | A | 3268 | 29  | 2  | 0.389821719583598    |
| MV_Schw | T | 3269 | 16  | 1  | 0.483965165529824    |
| MV_Schw | C | 3270 | 47  | 5  | 0.00427410825239779  |
| MV_Schw | A | 3271 | 64  | 5  | 0.0611551441006359   |
| MV_Schw | A | 3272 | 19  | 2  | 0.224063006917908    |
| MV_Schw | A | 3273 | 29  | 1  | 1                    |
| MV_Schw | G | 3274 | 246 | 16 | 7.77370988764532e-05 |

|         |   |      |      |    |                      |
|---------|---|------|------|----|----------------------|
| MV_Schw | G | 3275 | 45   | 7) | 0.000148527599082070 |
| MV_Schw | A | 3276 | 25   | 1  | 1                    |
| MV_Schw | G | 3277 | 45   | 1  | 1                    |
| MV_Schw | C | 3278 | 37   | 1  | 1                    |
| MV_Schw | C | 3279 | 128  | 9  | 0.00612561056885518  |
| MV_Schw | A | 3280 | 72   | 5  | 0.094193442838711    |
| MV_Schw | A | 3281 | 37   | 1  | 1                    |
| MV_Schw | T | 3282 | 128  | 2  | 1                    |
| MV_Schw | G | 3283 | 48   | 1  | 1                    |
| MV_Schw | A | 3284 | 52   | 2  | 0.78354985902497     |
| MV_Schw | T | 3285 | 48   | 4  | 0.0646277338805328   |
| MV_Schw | C | 3286 | 116  | 1  | 1                    |
| MV_Schw | T | 3287 | 110  | 1  | 0.789229943133706    |
| MV_Schw | T | 3288 | 209  | 12 | 0.00371697541983835  |
| MV_Schw | G | 3289 | 552  | 18 | 0.190980871255168    |
| MV_Schw | C | 3290 | 1070 | 23 | 1                    |
| MV_Schw | C | 3291 | 188  | 5  | 1                    |
| MV_Schw | A | 3292 | 81   | 3  | 0.88950624150852     |
| MV_Schw | A | 3293 | 16   | 1  | 0.950262622850522    |
| MV_Schw | G | 3294 | 308  | 5  | 1                    |
| MV_Schw | T | 3295 | 45   | 1  | 1                    |
| MV_Schw | T | 3296 | 19   | 1  | 0.57780206681461     |
| MV_Schw | C | 3297 | 161  | 0  | 0.119516505590852    |
| MV_Schw | C | 3298 | 118  | 1  | 1                    |
| MV_Schw | A | 3299 | 149  | 1  | 0.88950624150852     |
| MV_Schw | C | 3300 | 275  | 9  | 0.619556855087002    |
| MV_Schw | C | 3301 | 192  | 3  | 1                    |
| MV_Schw | A | 3302 | 14   | 0  | 1                    |
| MV_Schw | G | 3303 | 14   | 0  | 1                    |
| MV_Schw | A | 3304 | 21   | 1  | 1                    |
| MV_Schw | T | 3305 | 180  | 5  | 0.814096743847571    |
| MV_Schw | G | 3306 | 37   | 1  | 1                    |
| MV_Schw | C | 3307 | 39   | 1  | 1                    |
| MV_Schw | T | 3308 | 16   | 1  | 0.483965165529824    |
| MV_Schw | G | 3309 | 72   | 2  | 1                    |
| MV_Schw | A | 3310 | 52   | 1  | 1                    |

|         |   |      |     |    |                      |   |
|---------|---|------|-----|----|----------------------|---|
| MV_Schw | T | 3311 | 93  | 2  |                      | 1 |
| MV_Schw | G | 3312 | 103 | 2  |                      | 1 |
| MV_Schw | A | 3313 | 4   | 0  |                      | 1 |
| MV_Schw | A | 3314 | 19  | 0  |                      | 1 |
| MV_Schw | G | 3315 | 58  | 0  | 0.953489044526869    |   |
| MV_Schw | A | 3316 | 45  | 1  |                      | 1 |
| MV_Schw | T | 3317 | 79  | 1  |                      | 1 |
| MV_Schw | A | 3318 | 4   | 0  |                      | 1 |
| MV_Schw | A | 3319 | 8   | 1  | 0.789229943133706    |   |
| MV_Schw | T | 3320 | 70  | 0  | 0.789229943133706    |   |
| MV_Schw | A | 3321 | 66  | 0  | 0.789229943133706    |   |
| MV_Schw | A | 3322 | 17  | 1  | 0.528591092326266    |   |
| MV_Schw | T | 3323 | 23  | 1  | 0.658415249679101    |   |
| MV_Schw | G | 3324 | 35  | 1  | 0.863499923807603    |   |
| MV_Schw | A | 3325 | 6   | 0  |                      | 1 |
| MV_Schw | A | 3326 | 50  | 0  | 0.950262622850522    |   |
| MV_Schw | G | 3327 | 211 | 7  | 0.491835918445353    |   |
| MV_Schw | T | 3328 | 19  | 0  |                      | 1 |
| MV_Schw | A | 3329 | 17  | 0  |                      | 1 |
| MV_Schw | G | 3330 | 68  | 2  |                      | 1 |
| MV_Schw | C | 3331 | 225 | 4  |                      | 1 |
| MV_Schw | T | 3332 | 153 | 7  | 0.228458243153358    |   |
| MV_Schw | A | 3333 | 25  | 1  | 0.704667204683568    |   |
| MV_Schw | C | 3334 | 60  | 3  | 0.298698990757132    |   |
| MV_Schw | A | 3335 | 33  | 1  | 0.822598489333375    |   |
| MV_Schw | G | 3336 | 333 | 3  | 0.562679696554225    |   |
| MV_Schw | C | 3337 | 300 | 11 | 0.279856580126306    |   |
| MV_Schw | T | 3338 | 12  | 0  |                      | 1 |
| MV_Schw | C | 3339 | 76  | 2  |                      | 1 |
| MV_Schw | A | 3340 | 39  | 2  | 0.560243889454362    |   |
| MV_Schw | A | 3341 | 221 | 13 | 0.00261096618142580  |   |
| MV_Schw | C | 3342 | 444 | 27 | 2.08706637162880e-07 |   |
| MV_Schw | T | 3343 | 23  | 0  |                      | 1 |
| MV_Schw | T | 3344 | 39  | 2  | 0.560243889454362    |   |
| MV_Schw | A | 3345 | 4   | 0  |                      | 1 |
| MV_Schw | C | 3346 | 155 | 11 | 0.000466240727295021 |   |

|         |   |      |     |    |                      |
|---------|---|------|-----|----|----------------------|
| MV_Schw | C | 3347 | 432 | 26 | 7.79287333602351e-07 |
| MV_Schw | T | 3348 | 19  | 1  | 1                    |
| MV_Schw | G | 3349 | 155 | 5  | 0.628561029435961    |
| MV_Schw | C | 3350 | 47  | 3  | 0.366637777073510    |
| MV_Schw | C | 3351 | 213 | 9  | 0.200025780103629    |
| MV_Schw | A | 3352 | 200 | 11 | 0.0135938542850198   |
| MV_Schw | A | 3353 | 194 | 7  | 0.573345528574631    |
| MV_Schw | C | 3354 | 345 | 13 | 0.104030212625919    |
| MV_Schw | C | 3355 | 16  | 1  | 0.950262622850522    |
| MV_Schw | C | 3356 | 58  | 1  | 1                    |
| MV_Schw | C | 3357 | 103 | 3  | 1                    |
| MV_Schw | A | 3358 | 68  | 3  | 0.806176178462968    |
| MV_Schw | T | 3359 | 78  | 4  | 0.275013872879573    |
| MV_Schw | G | 3360 | 50  | 2  | 0.746970975838775    |
| MV_Schw | C | 3361 | 64  | 0  | 0.789229943133706    |
| MV_Schw | C | 3362 | 31  | 1  | 1                    |
| MV_Schw | A | 3363 | 14  | 0  | 1                    |
| MV_Schw | G | 3364 | 556 | 23 | 0.00750023308523162  |
| MV_Schw | T | 3365 | 14  | 0  | 1                    |
| MV_Schw | C | 3366 | 76  | 2  | 1                    |
| MV_Schw | G | 3367 | 293 | 3  | 0.501368851809361    |
| MV_Schw | A | 3368 | 41  | 1  | 1                    |
| MV_Schw | C | 3369 | 802 | 20 | 0.844248916800809    |
| MV_Schw | C | 3370 | 83  | 2  | 1                    |
| MV_Schw | C | 3371 | 21  | 1  | 0.632968068765344    |
| MV_Schw | A | 3372 | 136 | 3  | 1                    |
| MV_Schw | A | 3373 | 2   | 0  | 1                    |
| MV_Schw | C | 3374 | 502 | 20 | 0.0156988725401647   |
| MV_Schw | T | 3375 | 17  | 0  | 1                    |
| MV_Schw | A | 3376 | 17  | 1  | 0.983041048229953    |
| MV_Schw | G | 3377 | 110 | 1  | 1                    |
| MV_Schw | T | 3378 | 140 | 5  | 0.560243889454362    |
| MV_Schw | A | 3379 | 8   | 0  | 1                    |
| MV_Schw | C | 3380 | 0   | 0  | 1                    |
| MV_Schw | A | 3381 | 0   | 0  | 1                    |
| MV_Schw | A | 3382 | 2   | 0  | 1                    |

|         |    |      |     |   |                    |    |
|---------|----|------|-----|---|--------------------|----|
| MV_Schw | C  | 3383 | 87  | 1 |                    | 1  |
| MV_Schw | C  | 3384 | 0   | 0 |                    | 1  |
| MV_Schw | T  | 3385 | 2   | 0 |                    | 1  |
| MV_Schw | A  | 3386 | 2   | 0 |                    | 1  |
| MV_Schw | NA | 3387 | 0   | 0 |                    | NA |
| MV_Schw | A  | 3388 | 2   | 0 |                    | 1  |
| MV_Schw | NA | 3389 | 0   | 0 |                    | NA |
| MV_Schw | C  | 3390 | 14  | 0 |                    | 1  |
| MV_Schw | C  | 3391 | 0   | 0 |                    | 1  |
| MV_Schw | A  | 3392 | 2   | 0 |                    | 1  |
| MV_Schw | T  | 3393 | 0   | 0 |                    | 1  |
| MV_Schw | T  | 3394 | 0   | 1 | 0.307480793677112  |    |
| MV_Schw | NA | 3395 | 0   | 0 |                    | NA |
| MV_Schw | T  | 3396 | 8   | 0 |                    | 1  |
| MV_Schw | A  | 3397 | 68  | 0 | 0.789229943133706  |    |
| MV_Schw | A  | 3398 | 12  | 0 |                    | 1  |
| MV_Schw | A  | 3399 | 17  | 1 | 0.983041048229953  |    |
| MV_Schw | A  | 3400 | 6   | 0 |                    | 1  |
| MV_Schw | NA | 3401 | 0   | 0 |                    | NA |
| MV_Schw | NA | 3402 | 0   | 0 |                    | NA |
| MV_Schw | C  | 3403 | 64  | 1 |                    | 1  |
| MV_Schw | T  | 3404 | 10  | 0 |                    | 1  |
| MV_Schw | T  | 3405 | 6   | 0 |                    | 1  |
| MV_Schw | A  | 3406 | 6   | 0 |                    | 1  |
| MV_Schw | G  | 3407 | 10  | 1 | 0.822598489333375  |    |
| MV_Schw | G  | 3408 | 45  | 1 |                    | 1  |
| MV_Schw | A  | 3409 | 21  | 1 |                    | 1  |
| MV_Schw | G  | 3410 | 25  | 1 |                    | 1  |
| MV_Schw | C  | 3411 | 25  | 1 | 0.704667204683568  |    |
| MV_Schw | A  | 3412 | 41  | 1 |                    | 1  |
| MV_Schw | A  | 3413 | 260 | 1 | 0.181354408412572  |    |
| MV_Schw | A  | 3414 | 48  | 0 | 0.950262622850522  |    |
| MV_Schw | G  | 3415 | 378 | 2 | 0.0708608969643191 |    |
| MV_Schw | T  | 3416 | 141 | 1 | 0.542247232322076  |    |
| MV_Schw | G  | 3417 | 153 | 1 | 0.436311974989592  |    |
| MV_Schw | A  | 3418 | 147 | 1 | 0.88950624150852   |    |



|         |   |      |     |   |                    |
|---------|---|------|-----|---|--------------------|
| MV_Schw | T | 3419 | 101 | 0 | 0.51781700540984   |
| MV_Schw | T | 3420 | 83  | 1 | 1                  |
| MV_Schw | G | 3421 | 58  | 1 | 1                  |
| MV_Schw | C | 3422 | 10  | 0 | 1                  |
| MV_Schw | C | 3423 | 43  | 1 | 1                  |
| MV_Schw | T | 3424 | 33  | 0 | 1                  |
| MV_Schw | C | 3425 | 91  | 3 | 0.734151152837751  |
| MV_Schw | C | 3426 | 306 | 8 | 0.950262622850522  |
| MV_Schw | C | 3427 | 37  | 2 | 0.528591092326266  |
| MV_Schw | A | 3428 | 25  | 0 | 1                  |
| MV_Schw | A | 3429 | 19  | 0 | 1                  |
| MV_Schw | G | 3430 | 8   | 1 | 0.258627633593378  |
| MV_Schw | G | 3431 | 43  | 3 | 0.12801336938299   |
| MV_Schw | T | 3432 | 27  | 0 | 1                  |
| MV_Schw | C | 3433 | 81  | 2 | 1                  |
| MV_Schw | C | 3434 | 19  | 0 | 1                  |
| MV_Schw | A | 3435 | 19  | 0 | 1                  |
| MV_Schw | C | 3436 | 114 | 1 | 1                  |
| MV_Schw | A | 3437 | 10  | 0 | 1                  |
| MV_Schw | A | 3438 | 25  | 2 | 0.314611398059001  |
| MV_Schw | T | 3439 | 35  | 0 | 1                  |
| MV_Schw | G | 3440 | 23  | 0 | 1                  |
| MV_Schw | A | 3441 | 19  | 0 | 1                  |
| MV_Schw | C | 3442 | 370 | 1 | 0.0188268016494874 |
| MV_Schw | A | 3443 | 8   | 0 | 1                  |
| MV_Schw | G | 3444 | 85  | 1 | 1                  |
| MV_Schw | A | 3445 | 17  | 0 | 1                  |
| MV_Schw | G | 3446 | 17  | 1 | 0.983041048229953  |
| MV_Schw | A | 3447 | 2   | 0 | 1                  |
| MV_Schw | C | 3448 | 16  | 1 | 0.950262622850522  |
| MV_Schw | C | 3449 | 79  | 1 | 1                  |
| MV_Schw | T | 3450 | 83  | 2 | 1                  |
| MV_Schw | A | 3451 | 120 | 1 | 0.789229943133706  |
| MV_Schw | C | 3452 | 52  | 1 | 1                  |
| MV_Schw | G | 3453 | 50  | 1 | 1                  |
| MV_Schw | A | 3454 | 4   | 0 | 1                  |

|         |   |      |     |   |                   |   |
|---------|---|------|-----|---|-------------------|---|
| MV_Schw | C | 3455 | 138 | 1 | 0.673422966374487 |   |
| MV_Schw | T | 3456 | 25  | 0 |                   | 1 |
| MV_Schw | T | 3457 | 41  | 1 |                   | 1 |
| MV_Schw | C | 3458 | 248 | 3 | 0.997698747216897 |   |
| MV_Schw | G | 3459 | 54  | 1 |                   | 1 |
| MV_Schw | A | 3460 | 12  | 0 |                   | 1 |
| MV_Schw | C | 3461 | 50  | 1 |                   | 1 |
| MV_Schw | A | 3462 | 10  | 0 |                   | 1 |
| MV_Schw | A | 3463 | 6   | 0 |                   | 1 |
| MV_Schw | G | 3464 | 85  | 3 | 0.691829352390927 |   |
| MV_Schw | T | 3465 | 23  | 2 | 0.296710762771661 |   |
| MV_Schw | C | 3466 | 41  | 1 |                   | 1 |
| MV_Schw | G | 3467 | 21  | 0 |                   | 1 |
| MV_Schw | G | 3468 | 39  | 1 |                   | 1 |
| MV_Schw | C | 3469 | 79  | 1 |                   | 1 |
| MV_Schw | A | 3470 | 31  | 0 |                   | 1 |
| MV_Schw | T | 3471 | 48  | 2 | 0.709032941865358 |   |
| MV_Schw | G | 3472 | 492 | 9 |                   | 1 |
| MV_Schw | G | 3473 | 130 | 3 |                   | 1 |
| MV_Schw | G | 3474 | 105 | 1 |                   | 1 |
| MV_Schw | A | 3475 | 4   | 0 |                   | 1 |
| MV_Schw | C | 3476 | 41  | 1 |                   | 1 |
| MV_Schw | A | 3477 | 39  | 2 | 0.560243889454362 |   |
| MV_Schw | T | 3478 | 47  | 1 |                   | 1 |
| MV_Schw | C | 3479 | 192 | 3 |                   | 1 |
| MV_Schw | A | 3480 | 74  | 1 |                   | 1 |
| MV_Schw | A | 3481 | 2   | 1 | 0.491835918445353 |   |
| MV_Schw | A | 3482 | 27  | 0 |                   | 1 |
| MV_Schw | G | 3483 | 238 | 3 |                   | 1 |
| MV_Schw | G | 3484 | 58  | 1 |                   | 1 |
| MV_Schw | G | 3485 | 401 | 9 |                   | 1 |
| MV_Schw | T | 3486 | 39  | 1 | 0.9314909603024   |   |
| MV_Schw | C | 3487 | 54  | 3 | 0.480219983992261 |   |
| MV_Schw | G | 3488 | 143 | 3 |                   | 1 |
| MV_Schw | A | 3489 | 68  | 1 |                   | 1 |
| MV_Schw | T | 3490 | 39  | 1 |                   | 1 |

|         |   |      |     |   |                     |   |
|---------|---|------|-----|---|---------------------|---|
| MV_Schw | C | 3491 | 141 | 4 |                     | 1 |
| MV_Schw | G | 3492 | 17  | 1 | 0.983041048229953   |   |
| MV_Schw | C | 3493 | 531 | 6 | 0.366832525336205   |   |
| MV_Schw | T | 3494 | 33  | 0 |                     | 1 |
| MV_Schw | C | 3495 | 450 | 1 | 0.00397631240595753 |   |
| MV_Schw | C | 3496 | 31  | 1 |                     | 1 |
| MV_Schw | G | 3497 | 109 | 1 |                     | 1 |
| MV_Schw | A | 3498 | 52  | 0 | 0.950262622850522   |   |
| MV_Schw | T | 3499 | 47  | 1 |                     | 1 |
| MV_Schw | A | 3500 | 10  | 0 |                     | 1 |
| MV_Schw | C | 3501 | 87  | 2 |                     | 1 |
| MV_Schw | A | 3502 | 8   | 0 |                     | 1 |
| MV_Schw | A | 3503 | 8   | 0 |                     | 1 |
| MV_Schw | C | 3504 | 271 | 4 |                     | 1 |
| MV_Schw | C | 3505 | 70  | 1 |                     | 1 |
| MV_Schw | C | 3506 | 31  | 1 |                     | 1 |
| MV_Schw | A | 3507 | 12  | 0 |                     | 1 |
| MV_Schw | C | 3508 | 62  | 5 | 0.0180914242189996  |   |
| MV_Schw | C | 3509 | 25  | 1 |                     | 1 |
| MV_Schw | A | 3510 | 8   | 0 |                     | 1 |
| MV_Schw | C | 3511 | 14  | 0 |                     | 1 |
| MV_Schw | C | 3512 | 12  | 1 | 0.366832525336205   |   |
| MV_Schw | T | 3513 | 8   | 0 |                     | 1 |
| MV_Schw | A | 3514 | 12  | 0 |                     | 1 |
| MV_Schw | C | 3515 | 47  | 1 |                     | 1 |
| MV_Schw | A | 3516 | 12  | 1 | 0.88950624150852    |   |
| MV_Schw | G | 3517 | 35  | 1 |                     | 1 |
| MV_Schw | T | 3518 | 4   | 0 |                     | 1 |
| MV_Schw | G | 3519 | 21  | 0 |                     | 1 |
| MV_Schw | A | 3520 | 21  | 0 |                     | 1 |
| MV_Schw | T | 3521 | 43  | 3 | 0.308038546605154   |   |
| MV_Schw | G | 3522 | 182 | 3 |                     | 1 |
| MV_Schw | G | 3523 | 41  | 2 | 0.599534349993353   |   |
| MV_Schw | C | 3524 | 76  | 0 | 0.638894311640422   |   |
| MV_Schw | A | 3525 | 43  | 1 | 0.950262622850522   |   |
| MV_Schw | G | 3526 | 171 | 6 | 0.52558001665221    |   |

|         |    |      |     |   |                   |    |
|---------|----|------|-----|---|-------------------|----|
| MV_Schw | G  | 3527 | 101 | 2 |                   | 1  |
| MV_Schw | C  | 3528 | 103 | 1 |                   | 1  |
| MV_Schw | T  | 3529 | 52  | 1 |                   | 1  |
| MV_Schw | G  | 3530 | 143 | 2 |                   | 1  |
| MV_Schw | G  | 3531 | 87  | 1 |                   | 1  |
| MV_Schw | T  | 3532 | 21  | 0 |                   | 1  |
| MV_Schw | G  | 3533 | 310 | 3 | 0.426789350155389 |    |
| MV_Schw | C  | 3534 | 64  | 2 |                   | 1  |
| MV_Schw | C  | 3535 | 110 | 1 |                   | 1  |
| MV_Schw | C  | 3536 | 254 | 5 |                   | 1  |
| MV_Schw | C  | 3537 | 279 | 6 |                   | 1  |
| MV_Schw | A  | 3538 | 66  | 1 |                   | 1  |
| MV_Schw | G  | 3539 | 167 | 5 | 0.944879389258477 |    |
| MV_Schw | G  | 3540 | 153 | 3 |                   | 1  |
| MV_Schw | T  | 3541 | 58  | 1 |                   | 1  |
| MV_Schw | C  | 3542 | 118 | 1 |                   | 1  |
| MV_Schw | A  | 3543 | 4   | 0 |                   | 1  |
| MV_Schw | G  | 3544 | 178 | 3 |                   | 1  |
| MV_Schw | A  | 3545 | 14  | 1 | 0.944879389258477 |    |
| MV_Schw | G  | 3546 | 118 | 4 | 0.804012640024926 |    |
| MV_Schw | NA | 3547 | 0   | 0 |                   | NA |
| MV_Schw | C  | 3548 | 110 | 1 |                   | 1  |
| MV_Schw | A  | 3549 | 16  | 1 | 0.950262622850522 |    |
| MV_Schw | T  | 3550 | 31  | 1 |                   | 1  |
| MV_Schw | A  | 3551 | 78  | 1 |                   | 1  |
| MV_Schw | G  | 3552 | 16  | 2 | 0.157362228007976 |    |
| MV_Schw | A  | 3553 | 17  | 0 |                   | 1  |
| MV_Schw | T  | 3554 | 39  | 0 |                   | 1  |
| MV_Schw | C  | 3555 | 21  | 0 |                   | 1  |
| MV_Schw | C  | 3556 | 58  | 0 | 0.953489044526869 |    |
| MV_Schw | T  | 3557 | 14  | 0 |                   | 1  |
| MV_Schw | G  | 3558 | 43  | 1 |                   | 1  |
| MV_Schw | G  | 3559 | 345 | 4 | 0.690930939628128 |    |
| MV_Schw | T  | 3560 | 8   | 0 |                   | 1  |
| MV_Schw | C  | 3561 | 33  | 0 |                   | 1  |
| MV_Schw | T  | 3562 | 6   | 0 |                   | 1  |

|         |   |      |     |   |                   |   |
|---------|---|------|-----|---|-------------------|---|
| MV_Schw | A | 3563 | 19  | 0 |                   | 1 |
| MV_Schw | G | 3564 | 107 | 1 | 0.945767847051808 |   |
| MV_Schw | G | 3565 | 110 | 2 |                   | 1 |
| MV_Schw | C | 3566 | 105 | 1 |                   | 1 |
| MV_Schw | G | 3567 | 41  | 3 | 0.114736910412178 |   |
| MV_Schw | A | 3568 | 4   | 0 |                   | 1 |
| MV_Schw | C | 3569 | 211 | 6 | 0.875812649023012 |   |
| MV_Schw | A | 3570 | 17  | 1 | 0.983041048229953 |   |
| MV_Schw | G | 3571 | 99  | 3 |                   | 1 |
| MV_Schw | G | 3572 | 136 | 4 | 0.992435787288199 |   |
| MV_Schw | A | 3573 | 2   | 0 |                   | 1 |
| MV_Schw | A | 3574 | 43  | 0 |                   | 1 |
| MV_Schw | G | 3575 | 116 | 4 | 0.795434284511944 |   |
| MV_Schw | G | 3576 | 89  | 5 | 0.090192830807046 |   |
| MV_Schw | A | 3577 | 4   | 0 |                   | 1 |
| MV_Schw | T | 3578 | 60  | 1 |                   | 1 |
| MV_Schw | G | 3579 | 130 | 6 | 0.252336657944912 |   |
| MV_Schw | A | 3580 | 10  | 0 |                   | 1 |
| MV_Schw | A | 3581 | 39  | 2 | 0.560243889454362 |   |
| MV_Schw | T | 3582 | 56  | 2 | 0.968890372475178 |   |
| MV_Schw | G | 3583 | 205 | 3 |                   | 1 |
| MV_Schw | C | 3584 | 39  | 1 |                   | 1 |
| MV_Schw | T | 3585 | 48  | 3 | 0.390345857720356 |   |
| MV_Schw | T | 3586 | 48  | 2 | 0.709032941865358 |   |
| MV_Schw | T | 3587 | 95  | 3 | 0.764161655608143 |   |
| MV_Schw | A | 3588 | 6   | 0 |                   | 1 |
| MV_Schw | T | 3589 | 19  | 1 | 0.57780206681461  |   |
| MV_Schw | G | 3590 | 23  | 1 |                   | 1 |
| MV_Schw | T | 3591 | 8   | 0 |                   | 1 |
| MV_Schw | A | 3592 | 4   | 0 |                   | 1 |
| MV_Schw | C | 3593 | 58  | 1 |                   | 1 |
| MV_Schw | A | 3594 | 54  | 1 |                   | 1 |
| MV_Schw | T | 3595 | 29  | 0 |                   | 1 |
| MV_Schw | G | 3596 | 126 | 3 |                   | 1 |
| MV_Schw | T | 3597 | 6   | 0 |                   | 1 |
| MV_Schw | T | 3598 | 19  | 0 |                   | 1 |

|         |   |      |     |    |                   |   |
|---------|---|------|-----|----|-------------------|---|
| MV_Schw | T | 3599 | 4   | 0  |                   | 1 |
| MV_Schw | C | 3600 | 357 | 8  |                   | 1 |
| MV_Schw | T | 3601 | 14  | 1  | 0.944879389258477 |   |
| MV_Schw | G | 3602 | 252 | 7  |                   | 1 |
| MV_Schw | C | 3603 | 182 | 3  |                   | 1 |
| MV_Schw | T | 3604 | 35  | 0  |                   | 1 |
| MV_Schw | G | 3605 | 62  | 1  |                   | 1 |
| MV_Schw | G | 3606 | 31  | 1  |                   | 1 |
| MV_Schw | G | 3607 | 66  | 2  |                   | 1 |
| MV_Schw | G | 3608 | 47  | 1  |                   | 1 |
| MV_Schw | G | 3609 | 103 | 1  |                   | 1 |
| MV_Schw | T | 3610 | 4   | 0  |                   | 1 |
| MV_Schw | T | 3611 | 17  | 0  |                   | 1 |
| MV_Schw | G | 3612 | 465 | 10 |                   | 1 |
| MV_Schw | T | 3613 | 48  | 1  |                   | 1 |
| MV_Schw | T | 3614 | 134 | 2  |                   | 1 |
| MV_Schw | G | 3615 | 174 | 2  |                   | 1 |
| MV_Schw | A | 3616 | 39  | 1  |                   | 1 |
| MV_Schw | G | 3617 | 78  | 1  |                   | 1 |
| MV_Schw | G | 3618 | 147 | 2  |                   | 1 |
| MV_Schw | A | 3619 | 12  | 0  |                   | 1 |
| MV_Schw | C | 3620 | 560 | 13 |                   | 1 |
| MV_Schw | A | 3621 | 47  | 2  | 0.678058690427187 |   |
| MV_Schw | G | 3622 | 221 | 3  |                   | 1 |
| MV_Schw | C | 3623 | 250 | 5  |                   | 1 |
| MV_Schw | G | 3624 | 60  | 1  |                   | 1 |
| MV_Schw | A | 3625 | 83  | 1  |                   | 1 |
| MV_Schw | T | 3626 | 33  | 1  |                   | 1 |
| MV_Schw | T | 3627 | 66  | 1  |                   | 1 |
| MV_Schw | C | 3628 | 39  | 1  |                   | 1 |
| MV_Schw | C | 3629 | 110 | 1  |                   | 1 |
| MV_Schw | C | 3630 | 118 | 3  |                   | 1 |
| MV_Schw | T | 3631 | 48  | 0  | 0.950262622850522 |   |
| MV_Schw | A | 3632 | 52  | 1  |                   | 1 |
| MV_Schw | G | 3633 | 41  | 1  | 0.945767847051808 |   |
| MV_Schw | G | 3634 | 31  | 1  | 0.791667533131283 |   |

|         |   |      |     |   |                    |
|---------|---|------|-----|---|--------------------|
| MV_Schw | G | 3635 | 10  | 1 | 0.822598489333375  |
| MV_Schw | C | 3636 | 12  | 1 | 0.88950624150852   |
| MV_Schw | C | 3637 | 74  | 2 | 1                  |
| MV_Schw | T | 3638 | 23  | 2 | 0.296710762771661  |
| MV_Schw | C | 3639 | 10  | 0 | 1                  |
| MV_Schw | C | 3640 | 62  | 1 | 1                  |
| MV_Schw | A | 3641 | 58  | 1 | 1                  |
| MV_Schw | A | 3642 | 8   | 0 | 1                  |
| MV_Schw | T | 3643 | 62  | 0 | 0.789229943133706  |
| MV_Schw | C | 3644 | 33  | 2 | 0.463720798159947  |
| MV_Schw | G | 3645 | 64  | 1 | 1                  |
| MV_Schw | G | 3646 | 37  | 1 | 1                  |
| MV_Schw | G | 3647 | 277 | 3 | 0.598480293360952  |
| MV_Schw | C | 3648 | 229 | 3 | 0.88950624150852   |
| MV_Schw | G | 3649 | 48  | 1 | 1                  |
| MV_Schw | A | 3650 | 25  | 1 | 0.704667204683568  |
| MV_Schw | G | 3651 | 27  | 0 | 1                  |
| MV_Schw | C | 3652 | 37  | 1 | 1                  |
| MV_Schw | A | 3653 | 33  | 1 | 0.822598489333375  |
| MV_Schw | T | 3654 | 45  | 4 | 0.0485139564708208 |
| MV_Schw | T | 3655 | 58  | 1 | 1                  |
| MV_Schw | T | 3656 | 35  | 1 | 1                  |
| MV_Schw | G | 3657 | 91  | 0 | 0.497615650989996  |
| MV_Schw | G | 3658 | 33  | 1 | 1                  |
| MV_Schw | G | 3659 | 182 | 0 | 0.060993248324147  |
| MV_Schw | T | 3660 | 0   | 1 | 0.0328674635647276 |
| MV_Schw | T | 3661 | 10  | 0 | 1                  |
| MV_Schw | C | 3662 | 43  | 0 | 1                  |
| MV_Schw | C | 3663 | 72  | 1 | 1                  |
| MV_Schw | T | 3664 | 6   | 0 | 1                  |
| MV_Schw | G | 3665 | 211 | 2 | 0.73453580589799   |
| MV_Schw | C | 3666 | 25  | 0 | 1                  |
| MV_Schw | C | 3667 | 14  | 0 | 1                  |
| MV_Schw | C | 3668 | 99  | 1 | 1                  |
| MV_Schw | T | 3669 | 4   | 0 | 1                  |
| MV_Schw | T | 3670 | 2   | 0 | 1                  |

|         |   |      |     |   |                      |   |
|---------|---|------|-----|---|----------------------|---|
| MV_Schw | A | 3671 | 8   | 0 |                      | 1 |
| MV_Schw | G | 3672 | 21  | 1 | 0.632968068765344    |   |
| MV_Schw | G | 3673 | 19  | 0 |                      | 1 |
| MV_Schw | T | 3674 | 4   | 0 |                      | 1 |
| MV_Schw | G | 3675 | 27  | 1 |                      | 1 |
| MV_Schw | T | 3676 | 2   | 1 | 0.491835918445353    |   |
| MV_Schw | T | 3677 | 21  | 1 | 0.632968068765344    |   |
| MV_Schw | G | 3678 | 171 | 2 |                      | 1 |
| MV_Schw | G | 3679 | 116 | 3 |                      | 1 |
| MV_Schw | C | 3680 | 66  | 1 |                      | 1 |
| MV_Schw | A | 3681 | 14  | 0 |                      | 1 |
| MV_Schw | G | 3682 | 37  | 1 |                      | 1 |
| MV_Schw | A | 3683 | 17  | 0 |                      | 1 |
| MV_Schw | T | 3684 | 21  | 1 |                      | 1 |
| MV_Schw | C | 3685 | 23  | 0 |                      | 1 |
| MV_Schw | C | 3686 | 31  | 1 | 0.791667533131283    |   |
| MV_Schw | A | 3687 | 8   | 0 |                      | 1 |
| MV_Schw | C | 3688 | 120 | 2 |                      | 1 |
| MV_Schw | A | 3689 | 79  | 3 | 0.882548734849042    |   |
| MV_Schw | G | 3690 | 27  | 1 |                      | 1 |
| MV_Schw | C | 3691 | 153 | 3 |                      | 1 |
| MV_Schw | A | 3692 | 8   | 0 |                      | 1 |
| MV_Schw | A | 3693 | 12  | 0 |                      | 1 |
| MV_Schw | A | 3694 | 4   | 1 | 0.619556855087002    |   |
| MV_Schw | G | 3695 | 45  | 7 | 2.77143066096742e-05 |   |
| MV_Schw | C | 3696 | 8   | 1 | 0.258627633593378    |   |
| MV_Schw | C | 3697 | 43  | 0 |                      | 1 |
| MV_Schw | C | 3698 | 134 | 1 | 0.983041048229953    |   |
| MV_Schw | G | 3699 | 138 | 0 | 0.22714633168584     |   |
| MV_Schw | A | 3700 | 87  | 2 |                      | 1 |
| MV_Schw | A | 3701 | 31  | 1 |                      | 1 |
| MV_Schw | A | 3702 | 31  | 0 |                      | 1 |
| MV_Schw | A | 3703 | 8   | 0 |                      | 1 |
| MV_Schw | A | 3704 | 0   | 1 | 0.307480793677112    |   |
| MV_Schw | C | 3705 | 45  | 1 |                      | 1 |
| MV_Schw | T | 3706 | 12  | 0 |                      | 1 |



|         |   |      |     |    |                     |   |
|---------|---|------|-----|----|---------------------|---|
| MV_Schw | C | 3707 | 33  | 0  |                     | 1 |
| MV_Schw | C | 3708 | 169 | 5  | 0.945767847051808   |   |
| MV_Schw | T | 3709 | 12  | 0  |                     | 1 |
| MV_Schw | C | 3710 | 60  | 1  |                     | 1 |
| MV_Schw | A | 3711 | 43  | 1  | 0.950262622850522   |   |
| MV_Schw | A | 3712 | 10  | 1  | 0.822598489333375   |   |
| MV_Schw | A | 3713 | 27  | 1  |                     | 1 |
| MV_Schw | G | 3714 | 81  | 5  | 0.0615109920796856  |   |
| MV_Schw | A | 3715 | 31  | 0  |                     | 1 |
| MV_Schw | G | 3716 | 50  | 2  | 0.746970975838775   |   |
| MV_Schw | G | 3717 | 14  | 0  |                     | 1 |
| MV_Schw | C | 3718 | 52  | 0  | 0.950262622850522   |   |
| MV_Schw | C | 3719 | 27  | 1  |                     | 1 |
| MV_Schw | A | 3720 | 8   | 0  |                     | 1 |
| MV_Schw | C | 3721 | 248 | 6  |                     | 1 |
| MV_Schw | T | 3722 | 17  | 1  | 0.983041048229953   |   |
| MV_Schw | G | 3723 | 37  | 1  |                     | 1 |
| MV_Schw | A | 3724 | 17  | 1  | 0.983041048229953   |   |
| MV_Schw | G | 3725 | 250 | 9  | 0.273369386378934   |   |
| MV_Schw | C | 3726 | 54  | 5  | 0.00939140138445221 |   |
| MV_Schw | T | 3727 | 23  | 2  | 0.296710762771661   |   |
| MV_Schw | T | 3728 | 43  | 1  |                     | 1 |
| MV_Schw | G | 3729 | 74  | 1  |                     | 1 |
| MV_Schw | A | 3730 | 14  | 1  | 0.944879389258477   |   |
| MV_Schw | C | 3731 | 223 | 9  | 0.147610065220325   |   |
| MV_Schw | A | 3732 | 72  | 3  | 0.42458526175556    |   |
| MV_Schw | T | 3733 | 10  | 0  |                     | 1 |
| MV_Schw | A | 3734 | 19  | 0  |                     | 1 |
| MV_Schw | G | 3735 | 62  | 1  |                     | 1 |
| MV_Schw | T | 3736 | 33  | 1  |                     | 1 |
| MV_Schw | T | 3737 | 27  | 0  |                     | 1 |
| MV_Schw | G | 3738 | 393 | 11 | 0.840983359503437   |   |
| MV_Schw | T | 3739 | 4   | 0  |                     | 1 |
| MV_Schw | T | 3740 | 105 | 1  |                     | 1 |
| MV_Schw | A | 3741 | 54  | 1  |                     | 1 |
| MV_Schw | G | 3742 | 91  | 5  | 0.217911555108928   |   |

|         |   |      |     |    |                   |
|---------|---|------|-----|----|-------------------|
| MV_Schw | A | 3743 | 4   | 1  | 0.619556855087002 |
| MV_Schw | C | 3744 | 112 | 3  | 1                 |
| MV_Schw | G | 3745 | 124 | 2  | 1                 |
| MV_Schw | T | 3746 | 17  | 0  | 1                 |
| MV_Schw | A | 3747 | 14  | 1  | 0.944879389258477 |
| MV_Schw | C | 3748 | 128 | 3  | 1                 |
| MV_Schw | A | 3749 | 126 | 1  | 1                 |
| MV_Schw | G | 3750 | 172 | 5  | 0.789229943133706 |
| MV_Schw | C | 3751 | 244 | 3  | 0.996771597822493 |
| MV_Schw | A | 3752 | 17  | 1  | 0.983041048229953 |
| MV_Schw | G | 3753 | 93  | 2  | 1                 |
| MV_Schw | G | 3754 | 85  | 5  | 0.074997775457354 |
| MV_Schw | G | 3755 | 450 | 12 | 0.795187041925325 |
| MV_Schw | C | 3756 | 78  | 1  | 1                 |
| MV_Schw | T | 3757 | 14  | 0  | 1                 |
| MV_Schw | C | 3758 | 19  | 0  | 1                 |
| MV_Schw | A | 3759 | 17  | 1  | 0.983041048229953 |
| MV_Schw | A | 3760 | 35  | 1  | 1                 |
| MV_Schw | T | 3761 | 107 | 1  | 0.945767847051808 |
| MV_Schw | G | 3762 | 318 | 5  | 1                 |
| MV_Schw | A | 3763 | 48  | 1  | 1                 |
| MV_Schw | A | 3764 | 10  | 0  | 1                 |
| MV_Schw | A | 3765 | 8   | 0  | 1                 |
| MV_Schw | A | 3766 | 50  | 1  | 1                 |
| MV_Schw | A | 3767 | 2   | 0  | 1                 |
| MV_Schw | C | 3768 | 105 | 3  | 1                 |
| MV_Schw | T | 3769 | 23  | 1  | 0.658415249679101 |
| MV_Schw | G | 3770 | 41  | 1  | 1                 |
| MV_Schw | G | 3771 | 45  | 0  | 1                 |
| MV_Schw | T | 3772 | 8   | 0  | 1                 |
| MV_Schw | G | 3773 | 60  | 1  | 1                 |
| MV_Schw | T | 3774 | 2   | 0  | 1                 |
| MV_Schw | T | 3775 | 10  | 0  | 1                 |
| MV_Schw | C | 3776 | 83  | 1  | 1                 |
| MV_Schw | T | 3777 | 85  | 0  | 0.648224297390367 |
| MV_Schw | A | 3778 | 43  | 1  | 1                 |

|         |   |      |     |    |                   |   |
|---------|---|------|-----|----|-------------------|---|
| MV_Schw | C | 3779 | 620 | 11 |                   | 1 |
| MV_Schw | A | 3780 | 50  | 1  |                   | 1 |
| MV_Schw | A | 3781 | 45  | 3  | 0.144729111493106 |   |
| MV_Schw | C | 3782 | 316 | 8  |                   | 1 |
| MV_Schw | A | 3783 | 8   | 0  |                   | 1 |
| MV_Schw | A | 3784 | 10  | 0  |                   | 1 |
| MV_Schw | C | 3785 | 81  | 3  | 0.88950624150852  |   |
| MV_Schw | A | 3786 | 12  | 0  |                   | 1 |
| MV_Schw | C | 3787 | 56  | 1  |                   | 1 |
| MV_Schw | C | 3788 | 23  | 0  |                   | 1 |
| MV_Schw | C | 3789 | 72  | 4  | 0.222002676269896 |   |
| MV_Schw | C | 3790 | 192 | 5  |                   | 1 |
| MV_Schw | A | 3791 | 64  | 1  |                   | 1 |
| MV_Schw | C | 3792 | 190 | 5  | 0.950262622850522 |   |
| MV_Schw | T | 3793 | 74  | 0  | 0.795198078226602 |   |
| MV_Schw | A | 3794 | 25  | 0  |                   | 1 |
| MV_Schw | A | 3795 | 21  | 0  |                   | 1 |
| MV_Schw | C | 3796 | 112 | 2  |                   | 1 |
| MV_Schw | T | 3797 | 48  | 1  |                   | 1 |
| MV_Schw | C | 3798 | 68  | 0  | 0.789229943133706 |   |
| MV_Schw | T | 3799 | 12  | 1  | 0.88950624150852  |   |
| MV_Schw | C | 3800 | 52  | 1  |                   | 1 |
| MV_Schw | C | 3801 | 194 | 2  | 0.822598489333375 |   |
| MV_Schw | T | 3802 | 12  | 1  | 0.88950624150852  |   |
| MV_Schw | C | 3803 | 62  | 0  | 0.789229943133706 |   |
| MV_Schw | A | 3804 | 4   | 0  |                   | 1 |
| MV_Schw | C | 3805 | 14  | 0  |                   | 1 |
| MV_Schw | A | 3806 | 4   | 0  |                   | 1 |
| MV_Schw | C | 3807 | 8   | 1  | 0.789229943133706 |   |
| MV_Schw | C | 3808 | 50  | 0  | 0.950262622850522 |   |
| MV_Schw | T | 3809 | 8   | 0  |                   | 1 |
| MV_Schw | T | 3810 | 4   | 0  |                   | 1 |
| MV_Schw | G | 3811 | 21  | 1  | 0.632968068765344 |   |
| MV_Schw | G | 3812 | 43  | 1  | 0.950262622850522 |   |
| MV_Schw | A | 3813 | 6   | 0  |                   | 1 |
| MV_Schw | G | 3814 | 95  | 1  |                   | 1 |

|         |   |      |     |    |                   |   |
|---------|---|------|-----|----|-------------------|---|
| MV_Schw | A | 3815 | 4   | 0  |                   | 1 |
| MV_Schw | A | 3816 | 4   | 0  |                   | 1 |
| MV_Schw | A | 3817 | 17  | 1  | 0.528591092326266 |   |
| MV_Schw | G | 3818 | 91  | 3  | 0.734151152837751 |   |
| MV_Schw | G | 3819 | 87  | 3  | 0.935220820395243 |   |
| MV_Schw | T | 3820 | 10  | 0  |                   | 1 |
| MV_Schw | C | 3821 | 31  | 0  |                   | 1 |
| MV_Schw | C | 3822 | 114 | 2  |                   | 1 |
| MV_Schw | T | 3823 | 72  | 1  |                   | 1 |
| MV_Schw | A | 3824 | 35  | 1  |                   | 1 |
| MV_Schw | A | 3825 | 25  | 2  | 0.314611398059001 |   |
| MV_Schw | C | 3826 | 167 | 3  |                   | 1 |
| MV_Schw | A | 3827 | 43  | 1  | 0.950262622850522 |   |
| MV_Schw | A | 3828 | 6   | 0  |                   | 1 |
| MV_Schw | C | 3829 | 248 | 2  | 0.528869794103543 |   |
| MV_Schw | A | 3830 | 41  | 0  |                   | 1 |
| MV_Schw | G | 3831 | 62  | 1  |                   | 1 |
| MV_Schw | G | 3832 | 149 | 5  | 0.892314320616093 |   |
| MV_Schw | G | 3833 | 58  | 2  | 0.98139756833885  |   |
| MV_Schw | A | 3834 | 29  | 0  |                   | 1 |
| MV_Schw | G | 3835 | 58  | 4  | 0.118907467124559 |   |
| MV_Schw | T | 3836 | 21  | 1  |                   | 1 |
| MV_Schw | G | 3837 | 54  | 0  | 0.950262622850522 |   |
| MV_Schw | T | 3838 | 12  | 0  |                   | 1 |
| MV_Schw | C | 3839 | 514 | 13 | 0.983041048229953 |   |
| MV_Schw | T | 3840 | 140 | 3  |                   | 1 |
| MV_Schw | T | 3841 | 120 | 2  |                   | 1 |
| MV_Schw | C | 3842 | 151 | 4  |                   | 1 |
| MV_Schw | A | 3843 | 64  | 2  |                   | 1 |
| MV_Schw | A | 3844 | 66  | 2  |                   | 1 |
| MV_Schw | C | 3845 | 576 | 13 |                   | 1 |
| MV_Schw | G | 3846 | 58  | 2  | 0.98139756833885  |   |
| MV_Schw | C | 3847 | 23  | 1  | 0.658415249679101 |   |
| MV_Schw | A | 3848 | 23  | 1  |                   | 1 |
| MV_Schw | A | 3849 | 19  | 2  | 0.224063006917908 |   |
| MV_Schw | A | 3850 | 74  | 4  | 0.237817203872315 |   |

|         |   |      |     |   |                   |   |
|---------|---|------|-----|---|-------------------|---|
| MV_Schw | C | 3851 | 37  | 0 |                   | 1 |
| MV_Schw | C | 3852 | 91  | 1 |                   | 1 |
| MV_Schw | A | 3853 | 0   | 0 |                   | 1 |
| MV_Schw | A | 3854 | 12  | 1 | 0.88950624150852  |   |
| MV_Schw | G | 3855 | 120 | 3 |                   | 1 |
| MV_Schw | T | 3856 | 4   | 0 |                   | 1 |
| MV_Schw | G | 3857 | 114 | 3 |                   | 1 |
| MV_Schw | T | 3858 | 14  | 0 |                   | 1 |
| MV_Schw | G | 3859 | 48  | 1 |                   | 1 |
| MV_Schw | C | 3860 | 182 | 7 | 0.302665612003202 |   |
| MV_Schw | A | 3861 | 81  | 0 | 0.641186461810141 |   |
| MV_Schw | A | 3862 | 47  | 0 |                   | 1 |
| MV_Schw | T | 3863 | 66  | 2 |                   | 1 |
| MV_Schw | G | 3864 | 56  | 2 | 0.968890372475178 |   |
| MV_Schw | C | 3865 | 76  | 1 |                   | 1 |
| MV_Schw | G | 3866 | 184 | 0 | 0.060993248324147 |   |
| MV_Schw | G | 3867 | 234 | 3 |                   | 1 |
| MV_Schw | T | 3868 | 27  | 0 |                   | 1 |
| MV_Schw | T | 3869 | 10  | 0 |                   | 1 |
| MV_Schw | A | 3870 | 17  | 0 |                   | 1 |
| MV_Schw | A | 3871 | 60  | 1 |                   | 1 |
| MV_Schw | T | 3872 | 35  | 0 |                   | 1 |
| MV_Schw | C | 3873 | 136 | 3 |                   | 1 |
| MV_Schw | T | 3874 | 48  | 1 |                   | 1 |
| MV_Schw | G | 3875 | 33  | 0 |                   | 1 |
| MV_Schw | A | 3876 | 10  | 0 |                   | 1 |
| MV_Schw | T | 3877 | 109 | 0 | 0.381672248067152 |   |
| MV_Schw | A | 3878 | 8   | 0 |                   | 1 |
| MV_Schw | C | 3879 | 85  | 5 | 0.074997775457354 |   |
| MV_Schw | C | 3880 | 14  | 2 | 0.125475779768559 |   |
| MV_Schw | G | 3881 | 122 | 4 | 0.822598489333375 |   |
| MV_Schw | C | 3882 | 335 | 2 | 0.152804551431613 |   |
| MV_Schw | T | 3883 | 41  | 0 |                   | 1 |
| MV_Schw | C | 3884 | 118 | 1 | 0.789229943133706 |   |
| MV_Schw | G | 3885 | 76  | 0 | 0.638894311640422 |   |
| MV_Schw | A | 3886 | 37  | 0 |                   | 1 |

|         |   |      |     |    |                   |   |
|---------|---|------|-----|----|-------------------|---|
| MV_Schw | T | 3887 | 52  | 0  | 0.950262622850522 |   |
| MV_Schw | A | 3888 | 21  | 2  | 0.258627633593378 |   |
| MV_Schw | C | 3889 | 21  | 1  |                   | 1 |
| MV_Schw | C | 3890 | 25  | 0  |                   | 1 |
| MV_Schw | C | 3891 | 19  | 1  |                   | 1 |
| MV_Schw | C | 3892 | 742 | 13 |                   | 1 |
| MV_Schw | G | 3893 | 118 | 3  |                   | 1 |
| MV_Schw | C | 3894 | 207 | 4  |                   | 1 |
| MV_Schw | A | 3895 | 45  | 1  |                   | 1 |
| MV_Schw | G | 3896 | 136 | 3  |                   | 1 |
| MV_Schw | A | 3897 | 4   | 0  |                   | 1 |
| MV_Schw | G | 3898 | 10  | 0  |                   | 1 |
| MV_Schw | G | 3899 | 62  | 1  |                   | 1 |
| MV_Schw | T | 3900 | 6   | 1  | 0.704667204683568 |   |
| MV_Schw | T | 3901 | 21  | 0  |                   | 1 |
| MV_Schw | C | 3902 | 35  | 1  |                   | 1 |
| MV_Schw | C | 3903 | 209 | 1  | 0.444605338381727 |   |
| MV_Schw | G | 3904 | 256 | 5  |                   | 1 |
| MV_Schw | T | 3905 | 110 | 1  | 0.789229943133706 |   |
| MV_Schw | G | 3906 | 329 | 3  | 0.355029756941442 |   |
| MV_Schw | T | 3907 | 8   | 0  |                   | 1 |
| MV_Schw | T | 3908 | 33  | 1  |                   | 1 |
| MV_Schw | G | 3909 | 285 | 9  | 0.51781700540984  |   |
| MV_Schw | T | 3910 | 27  | 0  |                   | 1 |
| MV_Schw | T | 3911 | 10  | 1  | 0.822598489333375 |   |
| MV_Schw | T | 3912 | 72  | 1  |                   | 1 |
| MV_Schw | A | 3913 | 17  | 0  |                   | 1 |
| MV_Schw | T | 3914 | 25  | 1  |                   | 1 |
| MV_Schw | A | 3915 | 60  | 3  | 0.550155392537109 |   |
| MV_Schw | T | 3916 | 126 | 2  |                   | 1 |
| MV_Schw | G | 3917 | 58  | 1  |                   | 1 |
| MV_Schw | A | 3918 | 6   | 0  |                   | 1 |
| MV_Schw | G | 3919 | 186 | 3  |                   | 1 |
| MV_Schw | C | 3920 | 101 | 4  | 0.576193745443697 |   |
| MV_Schw | A | 3921 | 103 | 3  | 0.950262622850522 |   |
| MV_Schw | T | 3922 | 17  | 0  |                   | 1 |

|         |   |      |     |   |                    |   |
|---------|---|------|-----|---|--------------------|---|
| MV_Schw | C | 3923 | 78  | 1 |                    | 1 |
| MV_Schw | A | 3924 | 47  | 2 | 0.678058690427187  |   |
| MV_Schw | C | 3925 | 194 | 6 | 0.725511104255308  |   |
| MV_Schw | C | 3926 | 37  | 1 | 0.88950624150852   |   |
| MV_Schw | C | 3927 | 180 | 6 | 0.670827466361185  |   |
| MV_Schw | G | 3928 | 35  | 0 |                    | 1 |
| MV_Schw | T | 3929 | 10  | 1 | 0.822598489333375  |   |
| MV_Schw | C | 3930 | 116 | 3 | 0.957721317456694  |   |
| MV_Schw | T | 3931 | 29  | 1 |                    | 1 |
| MV_Schw | T | 3932 | 43  | 0 |                    | 1 |
| MV_Schw | T | 3933 | 6   | 0 |                    | 1 |
| MV_Schw | C | 3934 | 72  | 1 |                    | 1 |
| MV_Schw | G | 3935 | 78  | 2 |                    | 1 |
| MV_Schw | G | 3936 | 39  | 1 | 0.9314909603024    |   |
| MV_Schw | A | 3937 | 12  | 1 | 0.88950624150852   |   |
| MV_Schw | T | 3938 | 21  | 0 |                    | 1 |
| MV_Schw | A | 3939 | 14  | 0 |                    | 1 |
| MV_Schw | A | 3940 | 4   | 0 |                    | 1 |
| MV_Schw | C | 3941 | 79  | 3 | 0.882548734849042  |   |
| MV_Schw | G | 3942 | 107 | 5 | 0.181053376647436  |   |
| MV_Schw | G | 3943 | 50  | 2 | 0.746970975838775  |   |
| MV_Schw | G | 3944 | 33  | 0 |                    | 1 |
| MV_Schw | T | 3945 | 16  | 1 | 0.950262622850522  |   |
| MV_Schw | A | 3946 | 21  | 1 |                    | 1 |
| MV_Schw | T | 3947 | 6   | 2 | 0.0328674635647276 |   |
| MV_Schw | T | 3948 | 10  | 0 |                    | 1 |
| MV_Schw | A | 3949 | 4   | 1 | 0.619556855087002  |   |
| MV_Schw | C | 3950 | 258 | 5 |                    | 1 |
| MV_Schw | A | 3951 | 21  | 1 |                    | 1 |
| MV_Schw | C | 3952 | 79  | 3 | 0.658415249679101  |   |
| MV_Schw | C | 3953 | 39  | 1 | 0.9314909603024    |   |
| MV_Schw | G | 3954 | 43  | 1 | 0.950262622850522  |   |
| MV_Schw | T | 3955 | 10  | 0 |                    | 1 |
| MV_Schw | T | 3956 | 14  | 0 |                    | 1 |
| MV_Schw | C | 3957 | 126 | 1 | 0.658415249679101  |   |
| MV_Schw | C | 3958 | 54  | 1 |                    | 1 |

|         |   |      |     |   |                   |   |
|---------|---|------|-----|---|-------------------|---|
| MV_Schw | T | 3959 | 16  | 0 |                   | 1 |
| MV_Schw | A | 3960 | 29  | 1 |                   | 1 |
| MV_Schw | G | 3961 | 231 | 2 | 0.63332687953074  |   |
| MV_Schw | A | 3962 | 16  | 0 |                   | 1 |
| MV_Schw | A | 3963 | 16  | 0 |                   | 1 |
| MV_Schw | G | 3964 | 50  | 1 |                   | 1 |
| MV_Schw | A | 3965 | 6   | 0 |                   | 1 |
| MV_Schw | A | 3966 | 16  | 1 | 0.483965165529824 |   |
| MV_Schw | T | 3967 | 27  | 0 |                   | 1 |
| MV_Schw | G | 3968 | 64  | 2 |                   | 1 |
| MV_Schw | C | 3969 | 424 | 5 | 0.497615650989996 |   |
| MV_Schw | T | 3970 | 47  | 0 |                   | 1 |
| MV_Schw | G | 3971 | 310 | 6 |                   | 1 |
| MV_Schw | G | 3972 | 141 | 6 | 0.298485329352986 |   |
| MV_Schw | A | 3973 | 14  | 1 | 0.426789350155389 |   |
| MV_Schw | A | 3974 | 37  | 1 | 0.88950624150852  |   |
| MV_Schw | T | 3975 | 99  | 2 |                   | 1 |
| MV_Schw | T | 3976 | 12  | 0 |                   | 1 |
| MV_Schw | C | 3977 | 35  | 1 |                   | 1 |
| MV_Schw | A | 3978 | 23  | 0 |                   | 1 |
| MV_Schw | G | 3979 | 324 | 8 |                   | 1 |
| MV_Schw | A | 3980 | 87  | 1 |                   | 1 |
| MV_Schw | T | 3981 | 25  | 1 |                   | 1 |
| MV_Schw | C | 3982 | 33  | 0 |                   | 1 |
| MV_Schw | G | 3983 | 219 | 7 | 0.77901773725233  |   |
| MV_Schw | G | 3984 | 120 | 2 |                   | 1 |
| MV_Schw | T | 3985 | 60  | 2 | 0.983041048229953 |   |
| MV_Schw | C | 3986 | 74  | 3 | 0.831755077907185 |   |
| MV_Schw | A | 3987 | 41  | 1 |                   | 1 |
| MV_Schw | A | 3988 | 52  | 0 | 0.950262622850522 |   |
| MV_Schw | T | 3989 | 31  | 0 |                   | 1 |
| MV_Schw | G | 3990 | 165 | 3 |                   | 1 |
| MV_Schw | C | 3991 | 48  | 1 |                   | 1 |
| MV_Schw | A | 3992 | 19  | 0 |                   | 1 |
| MV_Schw | G | 3993 | 227 | 5 |                   | 1 |
| MV_Schw | T | 3994 | 43  | 0 |                   | 1 |



|         |   |      |     |   |                   |   |
|---------|---|------|-----|---|-------------------|---|
| MV_Schw | G | 3995 | 27  | 0 |                   | 1 |
| MV_Schw | G | 3996 | 39  | 0 |                   | 1 |
| MV_Schw | C | 3997 | 6   | 0 |                   | 1 |
| MV_Schw | C | 3998 | 211 | 8 | 0.296710762771661 |   |
| MV_Schw | T | 3999 | 19  | 0 |                   | 1 |
| MV_Schw | T | 4000 | 23  | 1 | 0.658415249679101 |   |
| MV_Schw | C | 4001 | 52  | 0 | 0.950262622850522 |   |
| MV_Schw | A | 4002 | 8   | 1 | 0.258627633593378 |   |
| MV_Schw | A | 4003 | 23  | 0 |                   | 1 |
| MV_Schw | C | 4004 | 83  | 3 | 0.897349285586955 |   |
| MV_Schw | C | 4005 | 50  | 2 | 0.746970975838775 |   |
| MV_Schw | T | 4006 | 43  | 1 |                   | 1 |
| MV_Schw | G | 4007 | 43  | 1 |                   | 1 |
| MV_Schw | C | 4008 | 149 | 1 | 0.88950624150852  |   |
| MV_Schw | T | 4009 | 68  | 0 | 0.789229943133706 |   |
| MV_Schw | G | 4010 | 45  | 1 |                   | 1 |
| MV_Schw | G | 4011 | 165 | 1 | 0.786994490087255 |   |
| MV_Schw | T | 4012 | 25  | 0 |                   | 1 |
| MV_Schw | G | 4013 | 12  | 0 |                   | 1 |
| MV_Schw | A | 4014 | 12  | 0 |                   | 1 |
| MV_Schw | C | 4015 | 50  | 1 |                   | 1 |
| MV_Schw | C | 4016 | 12  | 0 |                   | 1 |
| MV_Schw | C | 4017 | 45  | 1 |                   | 1 |
| MV_Schw | T | 4018 | 70  | 2 |                   | 1 |
| MV_Schw | T | 4019 | 2   | 1 | 0.491835918445353 |   |
| MV_Schw | A | 4020 | 10  | 0 |                   | 1 |
| MV_Schw | G | 4021 | 81  | 3 | 0.667619064364632 |   |
| MV_Schw | G | 4022 | 50  | 1 |                   | 1 |
| MV_Schw | A | 4023 | 23  | 0 |                   | 1 |
| MV_Schw | T | 4024 | 19  | 0 |                   | 1 |
| MV_Schw | T | 4025 | 64  | 1 |                   | 1 |
| MV_Schw | G | 4026 | 52  | 1 |                   | 1 |
| MV_Schw | A | 4027 | 2   | 0 |                   | 1 |
| MV_Schw | C | 4028 | 227 | 8 | 0.408952610404075 |   |
| MV_Schw | A | 4029 | 85  | 5 | 0.17325046551955  |   |
| MV_Schw | A | 4030 | 39  | 1 |                   | 1 |

|         |   |      |     |    |                    |   |
|---------|---|------|-----|----|--------------------|---|
| MV_Schw | G | 4031 | 126 | 2  |                    | 1 |
| MV_Schw | G | 4032 | 112 | 2  |                    | 1 |
| MV_Schw | C | 4033 | 74  | 1  |                    | 1 |
| MV_Schw | G | 4034 | 107 | 2  |                    | 1 |
| MV_Schw | A | 4035 | 23  | 0  |                    | 1 |
| MV_Schw | T | 4036 | 89  | 2  |                    | 1 |
| MV_Schw | A | 4037 | 45  | 0  |                    | 1 |
| MV_Schw | G | 4038 | 27  | 1  |                    | 1 |
| MV_Schw | G | 4039 | 29  | 1  |                    | 1 |
| MV_Schw | C | 4040 | 33  | 0  |                    | 1 |
| MV_Schw | C | 4041 | 147 | 3  |                    | 1 |
| MV_Schw | C | 4042 | 64  | 0  | 0.789229943133706  |   |
| MV_Schw | T | 4043 | 43  | 1  | 0.950262622850522  |   |
| MV_Schw | G | 4044 | 95  | 3  | 0.764161655608143  |   |
| MV_Schw | G | 4045 | 574 | 11 |                    | 1 |
| MV_Schw | G | 4046 | 174 | 4  |                    | 1 |
| MV_Schw | A | 4047 | 16  | 1  | 0.950262622850522  |   |
| MV_Schw | A | 4048 | 184 | 4  |                    | 1 |
| MV_Schw | G | 4049 | 54  | 1  |                    | 1 |
| MV_Schw | A | 4050 | 62  | 1  |                    | 1 |
| MV_Schw | T | 4051 | 6   | 0  |                    | 1 |
| MV_Schw | C | 4052 | 116 | 2  |                    | 1 |
| MV_Schw | A | 4053 | 128 | 2  |                    | 1 |
| MV_Schw | T | 4054 | 31  | 1  | 0.791667533131283  |   |
| MV_Schw | C | 4055 | 669 | 10 | 0.789229943133706  |   |
| MV_Schw | G | 4056 | 331 | 7  |                    | 1 |
| MV_Schw | A | 4057 | 14  | 1  | 0.944879389258477  |   |
| MV_Schw | C | 4058 | 147 | 3  |                    | 1 |
| MV_Schw | A | 4059 | 19  | 0  |                    | 1 |
| MV_Schw | A | 4060 | 21  | 1  | 0.632968068765344  |   |
| MV_Schw | T | 4061 | 29  | 1  | 0.789229943133706  |   |
| MV_Schw | A | 4062 | 0   | 1  | 0.307480793677112  |   |
| MV_Schw | C | 4063 | 19  | 1  |                    | 1 |
| MV_Schw | A | 4064 | 14  | 0  |                    | 1 |
| MV_Schw | G | 4065 | 109 | 3  | 0.950262622850522  |   |
| MV_Schw | A | 4066 | 31  | 3  | 0.0518737301478137 |   |

|         |   |      |     |    |                    |
|---------|---|------|-----|----|--------------------|
| MV_Schw | G | 4067 | 147 | 1  | 0.88950624150852   |
| MV_Schw | C | 4068 | 48  | 0  | 0.950262622850522  |
| MV_Schw | A | 4069 | 16  | 0  | 1                  |
| MV_Schw | A | 4070 | 33  | 1  | 1                  |
| MV_Schw | C | 4071 | 76  | 1  | 1                  |
| MV_Schw | T | 4072 | 23  | 0  | 1                  |
| MV_Schw | T | 4073 | 72  | 1  | 1                  |
| MV_Schw | C | 4074 | 138 | 1  | 0.983694697749173  |
| MV_Schw | C | 4075 | 236 | 5  | 1                  |
| MV_Schw | T | 4076 | 47  | 0  | 1                  |
| MV_Schw | G | 4077 | 308 | 8  | 0.950262622850522  |
| MV_Schw | A | 4078 | 43  | 1  | 1                  |
| MV_Schw | G | 4079 | 52  | 1  | 1                  |
| MV_Schw | G | 4080 | 136 | 1  | 0.667619064364632  |
| MV_Schw | C | 4081 | 87  | 2  | 1                  |
| MV_Schw | A | 4082 | 21  | 0  | 1                  |
| MV_Schw | A | 4083 | 8   | 0  | 1                  |
| MV_Schw | C | 4084 | 167 | 5  | 0.944879389258477  |
| MV_Schw | A | 4085 | 79  | 1  | 1                  |
| MV_Schw | T | 4086 | 29  | 0  | 1                  |
| MV_Schw | T | 4087 | 39  | 1  | 1                  |
| MV_Schw | T | 4088 | 31  | 1  | 1                  |
| MV_Schw | A | 4089 | 43  | 2  | 0.632968068765344  |
| MV_Schw | T | 4090 | 43  | 1  | 0.950262622850522  |
| MV_Schw | G | 4091 | 192 | 3  | 1                  |
| MV_Schw | G | 4092 | 27  | 0  | 1                  |
| MV_Schw | T | 4093 | 85  | 3  | 0.918952129071198  |
| MV_Schw | C | 4094 | 19  | 0  | 1                  |
| MV_Schw | C | 4095 | 120 | 4  | 0.813457243243208  |
| MV_Schw | A | 4096 | 31  | 0  | 1                  |
| MV_Schw | C | 4097 | 145 | 2  | 1                  |
| MV_Schw | A | 4098 | 50  | 1  | 1                  |
| MV_Schw | T | 4099 | 33  | 2  | 0.463720798159947  |
| MV_Schw | C | 4100 | 155 | 9  | 0.0244690997594899 |
| MV_Schw | G | 4101 | 99  | 2  | 1                  |
| MV_Schw | G | 4102 | 579 | 13 | 1                  |

|         |   |      |     |   |                   |   |
|---------|---|------|-----|---|-------------------|---|
| MV_Schw | G | 4103 | 70  | 1 |                   | 1 |
| MV_Schw | A | 4104 | 48  | 1 |                   | 1 |
| MV_Schw | A | 4105 | 41  | 2 | 0.599534349993353 |   |
| MV_Schw | C | 4106 | 54  | 1 |                   | 1 |
| MV_Schw | T | 4107 | 17  | 0 |                   | 1 |
| MV_Schw | T | 4108 | 14  | 1 | 0.944879389258477 |   |
| MV_Schw | C | 4109 | 50  | 0 | 0.950262622850522 |   |
| MV_Schw | A | 4110 | 70  | 1 |                   | 1 |
| MV_Schw | G | 4111 | 298 | 1 | 0.110724661200760 |   |
| MV_Schw | G | 4112 | 101 | 1 |                   | 1 |
| MV_Schw | A | 4113 | 12  | 1 | 0.88950624150852  |   |
| MV_Schw | G | 4114 | 78  | 1 |                   | 1 |
| MV_Schw | A | 4115 | 4   | 0 |                   | 1 |
| MV_Schw | A | 4116 | 10  | 0 |                   | 1 |
| MV_Schw | A | 4117 | 54  | 1 |                   | 1 |
| MV_Schw | G | 4118 | 97  | 3 |                   | 1 |
| MV_Schw | A | 4119 | 12  | 0 |                   | 1 |
| MV_Schw | A | 4120 | 2   | 0 |                   | 1 |
| MV_Schw | G | 4121 | 83  | 2 |                   | 1 |
| MV_Schw | A | 4122 | 37  | 0 |                   | 1 |
| MV_Schw | G | 4123 | 269 | 7 |                   | 1 |
| MV_Schw | T | 4124 | 4   | 0 |                   | 1 |
| MV_Schw | G | 4125 | 76  | 2 |                   | 1 |
| MV_Schw | A | 4126 | 6   | 0 |                   | 1 |
| MV_Schw | A | 4127 | 10  | 0 |                   | 1 |
| MV_Schw | G | 4128 | 382 | 7 |                   | 1 |
| MV_Schw | T | 4129 | 10  | 0 |                   | 1 |
| MV_Schw | C | 4130 | 37  | 0 |                   | 1 |
| MV_Schw | T | 4131 | 2   | 1 | 0.491835918445353 |   |
| MV_Schw | A | 4132 | 23  | 0 |                   | 1 |
| MV_Schw | C | 4133 | 132 | 1 | 0.659520109379356 |   |
| MV_Schw | T | 4134 | 29  | 2 | 0.389821719583598 |   |
| MV_Schw | C | 4135 | 21  | 1 |                   | 1 |
| MV_Schw | T | 4136 | 16  | 0 |                   | 1 |
| MV_Schw | G | 4137 | 264 | 7 |                   | 1 |
| MV_Schw | C | 4138 | 97  | 3 | 0.78354985902497  |   |

|         |   |      |     |    |                    |   |
|---------|---|------|-----|----|--------------------|---|
| MV_Schw | C | 4139 | 89  | 1  |                    | 1 |
| MV_Schw | G | 4140 | 118 | 6  | 0.131696362088734  |   |
| MV_Schw | A | 4141 | 16  | 0  |                    | 1 |
| MV_Schw | T | 4142 | 14  | 2  | 0.125475779768559  |   |
| MV_Schw | T | 4143 | 8   | 0  |                    | 1 |
| MV_Schw | A | 4144 | 6   | 0  |                    | 1 |
| MV_Schw | T | 4145 | 4   | 0  |                    | 1 |
| MV_Schw | T | 4146 | 87  | 2  |                    | 1 |
| MV_Schw | G | 4147 | 110 | 2  |                    | 1 |
| MV_Schw | C | 4148 | 10  | 1  | 0.307480793677112  |   |
| MV_Schw | A | 4149 | 6   | 0  |                    | 1 |
| MV_Schw | A | 4150 | 8   | 0  |                    | 1 |
| MV_Schw | A | 4151 | 2   | 1  | 0.491835918445353  |   |
| MV_Schw | A | 4152 | 12  | 1  | 0.88950624150852   |   |
| MV_Schw | T | 4153 | 31  | 2  | 0.428411386231373  |   |
| MV_Schw | G | 4154 | 10  | 1  | 0.822598489333375  |   |
| MV_Schw | A | 4155 | 10  | 0  |                    | 1 |
| MV_Schw | A | 4156 | 0   | 1  | 0.307480793677112  |   |
| MV_Schw | A | 4157 | 10  | 1  | 0.822598489333375  |   |
| MV_Schw | A | 4158 | 14  | 0  |                    | 1 |
| MV_Schw | T | 4159 | 4   | 0  |                    | 1 |
| MV_Schw | C | 4160 | 62  | 1  |                    | 1 |
| MV_Schw | G | 4161 | 37  | 2  | 0.528591092326266  |   |
| MV_Schw | A | 4162 | 85  | 5  | 0.17325046551955   |   |
| MV_Schw | A | 4163 | 45  | 4  | 0.0485139564708208 |   |
| MV_Schw | A | 4164 | 76  | 5  | 0.0447617119591361 |   |
| MV_Schw | A | 4165 | 12  | 0  |                    | 1 |
| MV_Schw | G | 4166 | 35  | 1  | 0.863499923807603  |   |
| MV_Schw | A | 4167 | 4   | 0  |                    | 1 |
| MV_Schw | T | 4168 | 66  | 2  |                    | 1 |
| MV_Schw | G | 4169 | 8   | 0  |                    | 1 |
| MV_Schw | G | 4170 | 19  | 1  |                    | 1 |
| MV_Schw | G | 4171 | 47  | 1  |                    | 1 |
| MV_Schw | C | 4172 | 41  | 1  |                    | 1 |
| MV_Schw | C | 4173 | 256 | 11 | 0.0979129039567312 |   |
| MV_Schw | T | 4174 | 14  | 1  | 0.426789350155389  |   |

|         |   |      |     |    |                      |
|---------|---|------|-----|----|----------------------|
| MV_Schw | G | 4175 | 409 | 13 | 0.498285516700032    |
| MV_Schw | G | 4176 | 196 | 10 | 0.0356936802355292   |
| MV_Schw | T | 4177 | 66  | 1  | 1                    |
| MV_Schw | T | 4178 | 122 | 5  | 0.337352366102426    |
| MV_Schw | T | 4179 | 58  | 3  | 0.281632101641278    |
| MV_Schw | T | 4180 | 43  | 2  | 0.632968068765344    |
| MV_Schw | T | 4181 | 43  | 2  | 0.632968068765344    |
| MV_Schw | G | 4182 | 89  | 1  | 1                    |
| MV_Schw | C | 4183 | 126 | 5  | 0.35554222034638     |
| MV_Schw | A | 4184 | 10  | 0  | 1                    |
| MV_Schw | C | 4185 | 50  | 2  | 0.746970975838775    |
| MV_Schw | T | 4186 | 2   | 0  | 1                    |
| MV_Schw | T | 4187 | 23  | 1  | 1                    |
| MV_Schw | G | 4188 | 118 | 4  | 0.804012640024926    |
| MV_Schw | G | 4189 | 161 | 4  | 1                    |
| MV_Schw | T | 4190 | 62  | 2  | 0.991517221373143    |
| MV_Schw | G | 4191 | 64  | 3  | 0.609091736782917    |
| MV_Schw | G | 4192 | 79  | 1  | 1                    |
| MV_Schw | G | 4193 | 12  | 1  | 0.366832525336205    |
| MV_Schw | A | 4194 | 37  | 1  | 0.88950624150852     |
| MV_Schw | T | 4195 | 56  | 1  | 1                    |
| MV_Schw | A | 4196 | 25  | 1  | 0.704667204683568    |
| MV_Schw | G | 4197 | 186 | 9  | 0.0898677847554452   |
| MV_Schw | G | 4198 | 359 | 17 | 0.00591222682959421  |
| MV_Schw | G | 4199 | 434 | 23 | 3.78376829035142e-05 |
| MV_Schw | G | 4200 | 118 | 3  | 1                    |
| MV_Schw | G | 4201 | 126 | 3  | 1                    |
| MV_Schw | C | 4202 | 438 | 13 | 0.632968068765344    |
| MV_Schw | A | 4203 | 50  | 1  | 1                    |
| MV_Schw | C | 4204 | 450 | 16 | 0.118191457916424    |
| MV_Schw | C | 4205 | 62  | 2  | 0.991517221373143    |
| MV_Schw | A | 4206 | 8   | 0  | 1                    |
| MV_Schw | G | 4207 | 89  | 2  | 1                    |
| MV_Schw | T | 4208 | 17  | 1  | 0.983041048229953    |
| MV_Schw | C | 4209 | 85  | 2  | 1                    |
| MV_Schw | T | 4210 | 107 | 4  | 0.619556855087002    |

|         |   |      |     |   |                   |
|---------|---|------|-----|---|-------------------|
| MV_Schw | T | 4211 | 41  | 2 | 0.599534349993353 |
| MV_Schw | C | 4212 | 110 | 1 | 1                 |
| MV_Schw | A | 4213 | 25  | 1 | 0.704667204683568 |
| MV_Schw | C | 4214 | 79  | 1 | 1                 |
| MV_Schw | A | 4215 | 62  | 1 | 1                 |
| MV_Schw | T | 4216 | 14  | 0 | 1                 |
| MV_Schw | T | 4217 | 19  | 1 | 1                 |
| MV_Schw | A | 4218 | 12  | 0 | 1                 |
| MV_Schw | G | 4219 | 76  | 5 | 0.116125222018745 |
| MV_Schw | A | 4220 | 16  | 1 | 0.950262622850522 |
| MV_Schw | A | 4221 | 33  | 1 | 0.822598489333375 |
| MV_Schw | G | 4222 | 68  | 1 | 1                 |
| MV_Schw | C | 4223 | 66  | 1 | 1                 |
| MV_Schw | A | 4224 | 14  | 1 | 0.944879389258477 |
| MV_Schw | C | 4225 | 14  | 1 | 0.426789350155389 |
| MV_Schw | A | 4226 | 37  | 2 | 0.528591092326266 |
| MV_Schw | G | 4227 | 283 | 8 | 0.82920869837831  |
| MV_Schw | G | 4228 | 91  | 2 | 1                 |
| MV_Schw | C | 4229 | 14  | 1 | 0.944879389258477 |
| MV_Schw | A | 4230 | 27  | 1 | 0.752394317790241 |
| MV_Schw | A | 4231 | 6   | 1 | 0.704667204683568 |
| MV_Schw | A | 4232 | 16  | 1 | 0.950262622850522 |
| MV_Schw | A | 4233 | 25  | 1 | 0.704667204683568 |
| MV_Schw | T | 4234 | 47  | 1 | 1                 |
| MV_Schw | G | 4235 | 21  | 0 | 1                 |
| MV_Schw | A | 4236 | 6   | 0 | 1                 |
| MV_Schw | G | 4237 | 279 | 3 | 0.819327818667335 |
| MV_Schw | C | 4238 | 211 | 3 | 0.957721317456694 |
| MV_Schw | A | 4239 | 33  | 1 | 0.822598489333375 |
| MV_Schw | A | 4240 | 76  | 1 | 1                 |
| MV_Schw | G | 4241 | 109 | 3 | 1                 |
| MV_Schw | A | 4242 | 29  | 1 | 1                 |
| MV_Schw | C | 4243 | 186 | 6 | 0.692135603522152 |
| MV_Schw | T | 4244 | 68  | 3 | 0.806176178462968 |
| MV_Schw | C | 4245 | 56  | 2 | 0.968890372475178 |
| MV_Schw | T | 4246 | 62  | 3 | 0.57780206681461  |

|         |   |      |     |    |                    |   |
|---------|---|------|-----|----|--------------------|---|
| MV_Schw | C | 4247 | 52  | 1  |                    | 1 |
| MV_Schw | C | 4248 | 231 | 6  | 0.987114400552037  |   |
| MV_Schw | A | 4249 | 33  | 1  |                    | 1 |
| MV_Schw | T | 4250 | 56  | 1  |                    | 1 |
| MV_Schw | G | 4251 | 116 | 3  |                    | 1 |
| MV_Schw | C | 4252 | 172 | 7  | 0.201911037789983  |   |
| MV_Schw | A | 4253 | 35  | 1  |                    | 1 |
| MV_Schw | C | 4254 | 6   | 0  |                    | 1 |
| MV_Schw | A | 4255 | 72  | 0  | 0.791667533131283  |   |
| MV_Schw | A | 4256 | 4   | 0  |                    | 1 |
| MV_Schw | C | 4257 | 169 | 3  |                    | 1 |
| MV_Schw | T | 4258 | 23  | 1  |                    | 1 |
| MV_Schw | C | 4259 | 52  | 0  | 0.950262622850522  |   |
| MV_Schw | G | 4260 | 47  | 1  |                    | 1 |
| MV_Schw | G | 4261 | 287 | 3  | 0.822598489333375  |   |
| MV_Schw | G | 4262 | 217 | 11 | 0.0319010759004556 |   |
| MV_Schw | T | 4263 | 10  | 0  |                    | 1 |
| MV_Schw | T | 4264 | 10  | 1  | 0.822598489333375  |   |
| MV_Schw | C | 4265 | 31  | 1  |                    | 1 |
| MV_Schw | A | 4266 | 14  | 1  | 0.426789350155389  |   |
| MV_Schw | A | 4267 | 169 | 3  |                    | 1 |
| MV_Schw | G | 4268 | 465 | 14 | 0.483965165529824  |   |
| MV_Schw | A | 4269 | 60  | 3  | 0.298698990757132  |   |
| MV_Schw | A | 4270 | 23  | 1  |                    | 1 |
| MV_Schw | G | 4271 | 37  | 2  | 0.528591092326266  |   |
| MV_Schw | A | 4272 | 10  | 0  |                    | 1 |
| MV_Schw | C | 4273 | 141 | 6  | 0.298485329352986  |   |
| MV_Schw | C | 4274 | 39  | 3  | 0.273798916014578  |   |
| MV_Schw | T | 4275 | 6   | 0  |                    | 1 |
| MV_Schw | T | 4276 | 19  | 1  |                    | 1 |
| MV_Schw | A | 4277 | 19  | 1  |                    | 1 |
| MV_Schw | T | 4278 | 39  | 2  | 0.560243889454362  |   |
| MV_Schw | G | 4279 | 87  | 3  | 0.704667204683568  |   |
| MV_Schw | T | 4280 | 2   | 1  | 0.491835918445353  |   |
| MV_Schw | T | 4281 | 16  | 1  | 0.483965165529824  |   |
| MV_Schw | A | 4282 | 2   | 0  |                    | 1 |



|         |   |      |     |    |                      |
|---------|---|------|-----|----|----------------------|
| MV_Schw | C | 4283 | 165 | 7  | 0.357971118117194    |
| MV_Schw | C | 4284 | 58  | 1  | 1                    |
| MV_Schw | C | 4285 | 419 | 9  | 1                    |
| MV_Schw | G | 4286 | 37  | 3  | 0.245202640825390    |
| MV_Schw | C | 4287 | 95  | 2  | 1                    |
| MV_Schw | T | 4288 | 64  | 2  | 1                    |
| MV_Schw | G | 4289 | 140 | 5  | 0.560243889454362    |
| MV_Schw | A | 4290 | 62  | 2  | 0.991517221373143    |
| MV_Schw | T | 4291 | 103 | 1  | 1                    |
| MV_Schw | G | 4292 | 6   | 0  | 1                    |
| MV_Schw | G | 4293 | 27  | 1  | 1                    |
| MV_Schw | A | 4294 | 12  | 3  | 0.0185822733014261   |
| MV_Schw | T | 4295 | 60  | 4  | 0.130118305522798    |
| MV_Schw | A | 4296 | 50  | 5  | 0.00646085985430435  |
| MV_Schw | T | 4297 | 2   | 1  | 0.491835918445353    |
| MV_Schw | C | 4298 | 47  | 1  | 1                    |
| MV_Schw | A | 4299 | 23  | 1  | 1                    |
| MV_Schw | A | 4300 | 227 | 18 | 7.65250133359143e-07 |
| MV_Schw | T | 4301 | 110 | 5  | 0.206887130359510    |
| MV_Schw | G | 4302 | 147 | 7  | 0.126593150614623    |
| MV_Schw | A | 4303 | 6   | 1  | 0.704667204683568    |
| MV_Schw | A | 4304 | 17  | 0  | 1                    |
| MV_Schw | G | 4305 | 62  | 4  | 0.144327963472984    |
| MV_Schw | A | 4306 | 12  | 1  | 0.88950624150852     |
| MV_Schw | C | 4307 | 217 | 4  | 1                    |
| MV_Schw | C | 4308 | 23  | 0  | 1                    |
| MV_Schw | T | 4309 | 12  | 0  | 1                    |
| MV_Schw | T | 4310 | 10  | 1  | 0.822598489333375    |
| MV_Schw | A | 4311 | 6   | 1  | 0.704667204683568    |
| MV_Schw | A | 4312 | 83  | 3  | 0.897349285586955    |
| MV_Schw | T | 4313 | 16  | 1  | 0.950262622850522    |
| MV_Schw | C | 4314 | 101 | 2  | 1                    |
| MV_Schw | G | 4315 | 35  | 1  | 0.863499923807603    |
| MV_Schw | A | 4316 | 10  | 1  | 0.822598489333375    |
| MV_Schw | T | 4317 | 105 | 3  | 0.950262622850522    |
| MV_Schw | T | 4318 | 58  | 3  | 0.528591092326266    |

|         |   |      |     |   |                    |
|---------|---|------|-----|---|--------------------|
| MV_Schw | A | 4319 | 0   | 0 | 1                  |
| MV_Schw | C | 4320 | 76  | 4 | 0.256701313538806  |
| MV_Schw | T | 4321 | 4   | 0 | 1                  |
| MV_Schw | C | 4322 | 87  | 3 | 0.704667204683568  |
| MV_Schw | T | 4323 | 43  | 0 | 1                  |
| MV_Schw | G | 4324 | 41  | 1 | 0.945767847051808  |
| MV_Schw | G | 4325 | 37  | 3 | 0.245202640825390  |
| MV_Schw | A | 4326 | 16  | 0 | 1                  |
| MV_Schw | G | 4327 | 97  | 2 | 1                  |
| MV_Schw | G | 4328 | 12  | 0 | 1                  |
| MV_Schw | A | 4329 | 143 | 1 | 0.542465567021569  |
| MV_Schw | G | 4330 | 238 | 5 | 1                  |
| MV_Schw | C | 4331 | 81  | 1 | 1                  |
| MV_Schw | A | 4332 | 23  | 1 | 1                  |
| MV_Schw | G | 4333 | 19  | 0 | 1                  |
| MV_Schw | A | 4334 | 27  | 1 | 0.752394317790241  |
| MV_Schw | T | 4335 | 39  | 1 | 1                  |
| MV_Schw | G | 4336 | 141 | 0 | 0.235179608025014  |
| MV_Schw | C | 4337 | 103 | 1 | 0.944879389258477  |
| MV_Schw | A | 4338 | 35  | 3 | 0.222002676269896  |
| MV_Schw | A | 4339 | 25  | 0 | 1                  |
| MV_Schw | G | 4340 | 153 | 3 | 1                  |
| MV_Schw | A | 4341 | 6   | 0 | 1                  |
| MV_Schw | T | 4342 | 23  | 0 | 1                  |
| MV_Schw | A | 4343 | 10  | 0 | 1                  |
| MV_Schw | G | 4344 | 91  | 3 | 1                  |
| MV_Schw | T | 4345 | 244 | 1 | 0.302058122534159  |
| MV_Schw | A | 4346 | 33  | 2 | 0.463720798159947  |
| MV_Schw | A | 4347 | 35  | 4 | 0.0204019317113173 |
| MV_Schw | G | 4348 | 29  | 1 | 1                  |
| MV_Schw | A | 4349 | 25  | 2 | 0.314611398059001  |
| MV_Schw | A | 4350 | 48  | 3 | 0.180802417286166  |
| MV_Schw | T | 4351 | 39  | 3 | 0.0985243136405861 |
| MV_Schw | C | 4352 | 48  | 0 | 0.950262622850522  |
| MV_Schw | C | 4353 | 45  | 1 | 1                  |
| MV_Schw | A | 4354 | 66  | 3 | 0.633417216184605  |

|         |    |      |     |    |                    |    |
|---------|----|------|-----|----|--------------------|----|
| MV_Schw | G  | 4355 | 432 | 13 | 0.441951654965022  |    |
| MV_Schw | G  | 4356 | 159 | 1  | 0.437783686960654  |    |
| MV_Schw | C  | 4357 | 87  | 1  |                    | 1  |
| MV_Schw | A  | 4358 | 23  | 3  | 0.0909615969432528 |    |
| MV_Schw | G  | 4359 | 172 | 5  |                    | 1  |
| MV_Schw | T  | 4360 | 21  | 0  |                    | 1  |
| MV_Schw | T  | 4361 | 97  | 2  |                    | 1  |
| MV_Schw | T  | 4362 | 39  | 1  |                    | 1  |
| MV_Schw | T  | 4363 | 83  | 3  | 0.897349285586955  |    |
| MV_Schw | G  | 4364 | 134 | 2  |                    | 1  |
| MV_Schw | C  | 4365 | 343 | 7  |                    | 1  |
| MV_Schw | A  | 4366 | 143 | 5  | 0.75130292006671   |    |
| MV_Schw | G  | 4367 | 70  | 1  |                    | 1  |
| MV_Schw | C  | 4368 | 10  | 0  |                    | 1  |
| MV_Schw | C  | 4369 | 39  | 1  |                    | 1  |
| MV_Schw | A  | 4370 | 126 | 0  | 0.305061614162072  |    |
| MV_Schw | T  | 4371 | 29  | 0  |                    | 1  |
| MV_Schw | C  | 4372 | 147 | 1  | 0.88950624150852   |    |
| MV_Schw | A  | 4373 | 10  | 0  |                    | 1  |
| MV_Schw | G  | 4374 | 134 | 5  | 0.704667204683568  |    |
| MV_Schw | T  | 4375 | 12  | 0  |                    | 1  |
| MV_Schw | NA | 4376 | 0   | 0  |                    | NA |
| MV_Schw | C  | 4377 | 31  | 1  |                    | 1  |
| MV_Schw | C  | 4378 | 118 | 1  |                    | 1  |
| MV_Schw | T  | 4379 | 35  | 1  | 0.863499923807603  |    |
| MV_Schw | C  | 4380 | 372 | 9  | 0.995025579972359  |    |
| MV_Schw | A  | 4381 | 52  | 1  |                    | 1  |
| MV_Schw | A  | 4382 | 10  | 1  | 0.822598489333375  |    |
| MV_Schw | G  | 4383 | 76  | 3  | 0.849410970830975  |    |
| MV_Schw | A  | 4384 | 14  | 0  |                    | 1  |
| MV_Schw | A  | 4385 | 10  | 1  | 0.822598489333375  |    |
| MV_Schw | T  | 4386 | 17  | 1  | 0.983041048229953  |    |
| MV_Schw | T  | 4387 | 120 | 2  |                    | 1  |
| MV_Schw | C  | 4388 | 91  | 2  |                    | 1  |
| MV_Schw | C  | 4389 | 101 | 1  | 0.944879389258477  |    |
| MV_Schw | G  | 4390 | 120 | 3  |                    | 1  |

|         |   |      |     |   |                   |
|---------|---|------|-----|---|-------------------|
| MV_Schw | C | 4391 | 186 | 7 | 0.44055837109039  |
| MV_Schw | A | 4392 | 43  | 1 | 1                 |
| MV_Schw | T | 4393 | 54  | 1 | 1                 |
| MV_Schw | T | 4394 | 8   | 0 | 1                 |
| MV_Schw | T | 4395 | 12  | 0 | 1                 |
| MV_Schw | A | 4396 | 31  | 1 | 1                 |
| MV_Schw | C | 4397 | 180 | 1 | 0.355193190288496 |
| MV_Schw | G | 4398 | 122 | 2 | 1                 |
| MV_Schw | A | 4399 | 12  | 0 | 1                 |
| MV_Schw | C | 4400 | 260 | 5 | 1                 |
| MV_Schw | G | 4401 | 39  | 0 | 1                 |
| MV_Schw | A | 4402 | 19  | 0 | 1                 |
| MV_Schw | C | 4403 | 200 | 2 | 0.822598489333375 |
| MV_Schw | G | 4404 | 76  | 1 | 1                 |
| MV_Schw | T | 4405 | 29  | 2 | 0.389821719583598 |
| MV_Schw | G | 4406 | 16  | 0 | 1                 |
| MV_Schw | A | 4407 | 47  | 1 | 1                 |
| MV_Schw | T | 4408 | 31  | 0 | 1                 |
| MV_Schw | C | 4409 | 68  | 1 | 1                 |
| MV_Schw | A | 4410 | 21  | 0 | 1                 |
| MV_Schw | T | 4411 | 21  | 1 | 1                 |
| MV_Schw | A | 4412 | 17  | 0 | 1                 |
| MV_Schw | A | 4413 | 33  | 0 | 1                 |
| MV_Schw | A | 4414 | 50  | 1 | 1                 |
| MV_Schw | T | 4415 | 128 | 1 | 1                 |
| MV_Schw | G | 4416 | 54  | 0 | 0.950262622850522 |
| MV_Schw | A | 4417 | 8   | 0 | 1                 |
| MV_Schw | T | 4418 | 58  | 1 | 1                 |
| MV_Schw | G | 4419 | 35  | 0 | 1                 |
| MV_Schw | A | 4420 | 6   | 0 | 1                 |
| MV_Schw | C | 4421 | 83  | 1 | 1                 |
| MV_Schw | C | 4422 | 45  | 0 | 1                 |
| MV_Schw | A | 4423 | 31  | 1 | 1                 |
| MV_Schw | A | 4424 | 16  | 2 | 0.157362228007976 |
| MV_Schw | G | 4425 | 345 | 6 | 1                 |
| MV_Schw | G | 4426 | 116 | 5 | 0.479133435065576 |

|         |    |      |     |    |                   |
|---------|----|------|-----|----|-------------------|
| MV_Schw | A  | 4427 | 12  | 1  | 0.88950624150852  |
| MV_Schw | C  | 4428 | 27  | 1  | 0.752394317790241 |
| MV_Schw | NA | 4429 | 0   | 0  | NA                |
| MV_Schw | A  | 4430 | 68  | 1  | 1                 |
| MV_Schw | T  | 4431 | 56  | 2  | 0.968890372475178 |
| MV_Schw | T  | 4432 | 81  | 1  | 1                 |
| MV_Schw | C  | 4433 | 298 | 4  | 0.950262622850522 |
| MV_Schw | A  | 4434 | 37  | 1  | 0.88950624150852  |
| MV_Schw | A  | 4435 | 60  | 0  | 0.957721317456694 |
| MV_Schw | A  | 4436 | 23  | 1  | 0.658415249679101 |
| MV_Schw | G  | 4437 | 192 | 2  | 0.822598489333375 |
| MV_Schw | T  | 4438 | 4   | 0  | 1                 |
| MV_Schw | T  | 4439 | 17  | 1  | 0.983041048229953 |
| MV_Schw | C  | 4440 | 39  | 0  | 1                 |
| MV_Schw | T  | 4441 | 41  | 2  | 0.599534349993353 |
| MV_Schw | G  | 4442 | 128 | 4  | 0.840295409296105 |
| MV_Schw | T  | 4443 | 19  | 1  | 0.57780206681461  |
| MV_Schw | A  | 4444 | 16  | 0  | 1                 |
| MV_Schw | G  | 4445 | 54  | 0  | 0.950262622850522 |
| MV_Schw | A  | 4446 | 8   | 0  | 1                 |
| MV_Schw | C  | 4447 | 54  | 1  | 1                 |
| MV_Schw | C  | 4448 | 41  | 1  | 1                 |
| MV_Schw | G  | 4449 | 66  | 1  | 1                 |
| MV_Schw | T  | 4450 | 17  | 0  | 1                 |
| MV_Schw | A  | 4451 | 4   | 0  | 1                 |
| MV_Schw | G  | 4452 | 120 | 1  | 0.789229943133706 |
| MV_Schw | T  | 4453 | 21  | 0  | 1                 |
| MV_Schw | G  | 4454 | 27  | 0  | 1                 |
| MV_Schw | C  | 4455 | 72  | 3  | 0.42458526175556  |
| MV_Schw | C  | 4456 | 78  | 2  | 1                 |
| MV_Schw | C  | 4457 | 845 | 20 | 1                 |
| MV_Schw | A  | 4458 | 68  | 1  | 1                 |
| MV_Schw | G  | 4459 | 238 | 5  | 1                 |
| MV_Schw | C  | 4460 | 215 | 5  | 1                 |
| MV_Schw | A  | 4461 | 16  | 1  | 0.483965165529824 |
| MV_Schw | A  | 4462 | 74  | 1  | 1                 |

|         |   |      |     |    |                     |   |
|---------|---|------|-----|----|---------------------|---|
| MV_Schw | T | 4463 | 25  | 0  |                     | 1 |
| MV_Schw | G | 4464 | 76  | 1  |                     | 1 |
| MV_Schw | C | 4465 | 78  | 2  |                     | 1 |
| MV_Schw | C | 4466 | 459 | 10 |                     | 1 |
| MV_Schw | C | 4467 | 337 | 5  |                     | 1 |
| MV_Schw | G | 4468 | 291 | 3  | 0.746970975838775   |   |
| MV_Schw | A | 4469 | 97  | 0  | 0.503192867159235   |   |
| MV_Schw | A | 4470 | 126 | 5  | 0.536502598785117   |   |
| MV_Schw | A | 4471 | 52  | 1  |                     | 1 |
| MV_Schw | A | 4472 | 70  | 2  |                     | 1 |
| MV_Schw | C | 4473 | 234 | 11 | 0.0265373688297422  |   |
| MV_Schw | G | 4474 | 93  | 5  | 0.230316890082773   |   |
| MV_Schw | A | 4475 | 62  | 1  |                     | 1 |
| MV_Schw | C | 4476 | 583 | 17 | 0.436962346550212   |   |
| MV_Schw | C | 4477 | 33  | 1  |                     | 1 |
| MV_Schw | C | 4478 | 6   | 1  | 0.704667204683568   |   |
| MV_Schw | C | 4479 | 27  | 3  | 0.0351423582402498  |   |
| MV_Schw | C | 4480 | 35  | 3  | 0.222002676269896   |   |
| MV_Schw | C | 4481 | 362 | 12 | 0.353023575911474   |   |
| MV_Schw | T | 4482 | 97  | 3  |                     | 1 |
| MV_Schw | C | 4483 | 66  | 6  | 0.00731721341976711 |   |
| MV_Schw | A | 4484 | 21  | 1  | 0.632968068765344   |   |
| MV_Schw | C | 4485 | 103 | 7  | 0.0290526919708477  |   |
| MV_Schw | A | 4486 | 10  | 1  | 0.822598489333375   |   |
| MV_Schw | A | 4487 | 45  | 2  | 0.65158773158174    |   |
| MV_Schw | T | 4488 | 54  | 5  | 0.00939140138445221 |   |
| MV_Schw | G | 4489 | 176 | 7  | 0.394619167044631   |   |
| MV_Schw | A | 4490 | 4   | 0  |                     | 1 |
| MV_Schw | C | 4491 | 149 | 5  | 0.599534349993353   |   |
| MV_Schw | A | 4492 | 45  | 1  |                     | 1 |
| MV_Schw | G | 4493 | 136 | 8  | 0.0240427960452029  |   |
| MV_Schw | C | 4494 | 105 | 5  | 0.414034029869785   |   |
| MV_Schw | C | 4495 | 217 | 7  | 0.770363429662708   |   |
| MV_Schw | A | 4496 | 21  | 3  | 0.0171246304850916  |   |
| MV_Schw | G | 4497 | 153 | 4  |                     | 1 |
| MV_Schw | A | 4498 | 29  | 1  | 0.789229943133706   |   |

|         |   |      |     |    |                      |
|---------|---|------|-----|----|----------------------|
| MV_Schw | A | 4499 | 4   | 0  | 1                    |
| MV_Schw | G | 4500 | 120 | 3  | 0.97940134364504     |
| MV_Schw | G | 4501 | 110 | 7  | 0.0429535742816985   |
| MV_Schw | C | 4502 | 368 | 22 | 8.72397257365655e-06 |
| MV_Schw | C | 4503 | 207 | 7  | 0.628989544511172    |
| MV_Schw | C | 4504 | 149 | 7  | 0.215757612560076    |
| MV_Schw | G | 4505 | 337 | 14 | 0.0457003930742528   |
| MV_Schw | G | 4506 | 174 | 7  | 0.211393512474581    |
| MV_Schw | A | 4507 | 29  | 1  | 1                    |
| MV_Schw | C | 4508 | 442 | 34 | 3.86654414792986e-12 |
| MV_Schw | A | 4509 | 401 | 23 | 7.06564226558477e-06 |
| MV_Schw | A | 4510 | 151 | 11 | 0.00108411989851647  |
| MV_Schw | A | 4511 | 89  | 5  | 0.201986157592846    |
| MV_Schw | A | 4512 | 107 | 5  | 0.181053376647436    |
| MV_Schw | A | 4513 | 89  | 1  | 1                    |
| MV_Schw | A | 4514 | 45  | 1  | 1                    |
| MV_Schw | G | 4515 | 302 | 7  | 1                    |
| MV_Schw | C | 4516 | 64  | 1  | 1                    |
| MV_Schw | C | 4517 | 56  | 1  | 1                    |
| MV_Schw | C | 4518 | 10  | 1  | 0.307480793677112    |
| MV_Schw | C | 4519 | 29  | 1  | 1                    |
| MV_Schw | C | 4520 | 130 | 5  | 0.68615038702224     |
| MV_Schw | T | 4521 | 6   | 0  | 1                    |
| MV_Schw | C | 4522 | 279 | 9  | 0.632263705599953    |
| MV_Schw | C | 4523 | 258 | 7  | 0.804012574266476    |
| MV_Schw | G | 4524 | 709 | 31 | 0.000231936890228797 |
| MV_Schw | A | 4525 | 339 | 11 | 0.500313401850085    |
| MV_Schw | A | 4526 | 56  | 5  | 0.0364706341145788   |
| MV_Schw | A | 4527 | 47  | 1  | 1                    |
| MV_Schw | G | 4528 | 33  | 1  | 1                    |
| MV_Schw | A | 4529 | 31  | 0  | 1                    |
| MV_Schw | C | 4530 | 64  | 5  | 0.0208977336518193   |
| MV_Schw | T | 4531 | 17  | 0  | 1                    |
| MV_Schw | C | 4532 | 250 | 9  | 0.451379323214012    |
| MV_Schw | C | 4533 | 554 | 11 | 1                    |
| MV_Schw | A | 4534 | 83  | 0  | 0.645428736569362    |

|         |   |      |     |    |                    |   |
|---------|---|------|-----|----|--------------------|---|
| MV_Schw | C | 4535 | 101 | 3  | 0.789229943133706  |   |
| MV_Schw | G | 4536 | 33  | 1  |                    | 1 |
| MV_Schw | G | 4537 | 99  | 2  |                    | 1 |
| MV_Schw | A | 4538 | 8   | 1  | 0.789229943133706  |   |
| MV_Schw | C | 4539 | 31  | 0  |                    | 1 |
| MV_Schw | C | 4540 | 81  | 1  |                    | 1 |
| MV_Schw | A | 4541 | 16  | 1  | 0.950262622850522  |   |
| MV_Schw | A | 4542 | 21  | 0  |                    | 1 |
| MV_Schw | G | 4543 | 134 | 3  |                    | 1 |
| MV_Schw | C | 4544 | 382 | 6  |                    | 1 |
| MV_Schw | G | 4545 | 58  | 3  | 0.281632101641278  |   |
| MV_Schw | A | 4546 | 12  | 0  |                    | 1 |
| MV_Schw | G | 4547 | 93  | 3  |                    | 1 |
| MV_Schw | A | 4548 | 37  | 1  |                    | 1 |
| MV_Schw | G | 4549 | 58  | 1  |                    | 1 |
| MV_Schw | G | 4550 | 99  | 3  |                    | 1 |
| MV_Schw | C | 4551 | 31  | 1  |                    | 1 |
| MV_Schw | C | 4552 | 149 | 0  | 0.164331455962041  |   |
| MV_Schw | A | 4553 | 31  | 1  |                    | 1 |
| MV_Schw | G | 4554 | 198 | 9  | 0.0654422828729673 |   |
| MV_Schw | C | 4555 | 47  | 3  | 0.366637777073510  |   |
| MV_Schw | C | 4556 | 233 | 3  | 0.88950624150852   |   |
| MV_Schw | A | 4557 | 21  | 2  | 0.258627633593378  |   |
| MV_Schw | G | 4558 | 45  | 0  |                    | 1 |
| MV_Schw | C | 4559 | 83  | 3  | 0.678058690427187  |   |
| MV_Schw | A | 4560 | 14  | 1  | 0.944879389258477  |   |
| MV_Schw | G | 4561 | 112 | 2  |                    | 1 |
| MV_Schw | C | 4562 | 390 | 7  |                    | 1 |
| MV_Schw | C | 4563 | 291 | 2  | 0.300896921812852  |   |
| MV_Schw | G | 4564 | 81  | 4  | 0.305908359426921  |   |
| MV_Schw | A | 4565 | 31  | 0  |                    | 1 |
| MV_Schw | C | 4566 | 405 | 13 | 0.41505475936109   |   |
| MV_Schw | G | 4567 | 29  | 0  |                    | 1 |
| MV_Schw | G | 4568 | 234 | 3  |                    | 1 |
| MV_Schw | C | 4569 | 93  | 1  |                    | 1 |
| MV_Schw | A | 4570 | 12  | 0  |                    | 1 |



|         |   |      |     |    |                      |
|---------|---|------|-----|----|----------------------|
| MV_Schw | A | 4571 | 83  | 3  | 0.897349285586955    |
| MV_Schw | G | 4572 | 105 | 3  | 0.950262622850522    |
| MV_Schw | C | 4573 | 304 | 9  | 0.789229943133706    |
| MV_Schw | G | 4574 | 225 | 3  | 1                    |
| MV_Schw | C | 4575 | 240 | 5  | 1                    |
| MV_Schw | G | 4576 | 229 | 9  | 0.307480793677112    |
| MV_Schw | A | 4577 | 70  | 4  | 0.206412498777864    |
| MV_Schw | A | 4578 | 60  | 3  | 0.550155392537109    |
| MV_Schw | C | 4579 | 130 | 5  | 0.68615038702224     |
| MV_Schw | A | 4580 | 6   | 1  | 0.704667204683568    |
| MV_Schw | C | 4581 | 16  | 2  | 0.157362228007976    |
| MV_Schw | C | 4582 | 50  | 3  | 0.199842243730937    |
| MV_Schw | A | 4583 | 27  | 1  | 0.752394317790241    |
| MV_Schw | G | 4584 | 254 | 7  | 0.794204819559428    |
| MV_Schw | G | 4585 | 52  | 5  | 0.0276232541140027   |
| MV_Schw | C | 4586 | 182 | 9  | 0.0826899854963631   |
| MV_Schw | G | 4587 | 50  | 2  | 0.746970975838775    |
| MV_Schw | G | 4588 | 17  | 3  | 0.0469760201915419   |
| MV_Schw | C | 4589 | 225 | 13 | 0.00126260970613789  |
| MV_Schw | C | 4590 | 91  | 5  | 0.0982183359341293   |
| MV_Schw | C | 4591 | 242 | 15 | 0.000463530719184034 |
| MV_Schw | C | 4592 | 85  | 7  | 0.00993851370517883  |
| MV_Schw | A | 4593 | 37  | 1  | 0.88950624150852     |
| MV_Schw | G | 4594 | 103 | 5  | 0.404041148508532    |
| MV_Schw | C | 4595 | 291 | 26 | 5.02511390509286e-11 |
| MV_Schw | A | 4596 | 31  | 3  | 0.0518737301478137   |
| MV_Schw | C | 4597 | 107 | 9  | 0.00144931425702894  |
| MV_Schw | A | 4598 | 16  | 2  | 0.157362228007976    |
| MV_Schw | G | 4599 | 138 | 13 | 2.76754695458636e-06 |
| MV_Schw | A | 4600 | 66  | 3  | 0.354972433257953    |
| MV_Schw | A | 4601 | 14  | 3  | 0.0263539968766402   |
| MV_Schw | C | 4602 | 266 | 23 | 3.25536730395424e-09 |
| MV_Schw | A | 4603 | 16  | 1  | 0.950262622850522    |
| MV_Schw | G | 4604 | 62  | 5  | 0.0540493900876719   |
| MV_Schw | C | 4605 | 136 | 9  | 0.0095448845390227   |
| MV_Schw | C | 4606 | 136 | 9  | 0.0095448845390227   |

|         |   |      |     |    |                      |
|---------|---|------|-----|----|----------------------|
| MV_Schw | C | 4607 | 351 | 17 | 0.00279883500623642  |
| MV_Schw | T | 4608 | 66  | 3  | 0.633417216184605    |
| MV_Schw | G | 4609 | 202 | 9  | 0.0722143977647632   |
| MV_Schw | A | 4610 | 6   | 1  | 0.704667204683568    |
| MV_Schw | C | 4611 | 353 | 15 | 0.0224165417673775   |
| MV_Schw | A | 4612 | 41  | 2  | 0.599534349993353    |
| MV_Schw | C | 4613 | 37  | 3  | 0.245202640825390    |
| MV_Schw | A | 4614 | 45  | 1  | 1                    |
| MV_Schw | A | 4615 | 16  | 1  | 0.950262622850522    |
| MV_Schw | G | 4616 | 316 | 15 | 0.00772452151572766  |
| MV_Schw | G | 4617 | 76  | 5  | 0.116125222018745    |
| MV_Schw | C | 4618 | 341 | 22 | 1.9580920041726e-06  |
| MV_Schw | C | 4619 | 97  | 6  | 0.053691133210959    |
| MV_Schw | A | 4620 | 66  | 6  | 0.00731721341976711  |
| MV_Schw | C | 4621 | 581 | 39 | 1.82351727156919e-11 |
| MV_Schw | C | 4622 | 83  | 4  | 0.311085536765447    |
| MV_Schw | A | 4623 | 99  | 6  | 0.0595788695726893   |
| MV_Schw | C | 4624 | 145 | 11 | 0.000736926840199571 |
| MV_Schw | C | 4625 | 76  | 4  | 0.256701313538806    |
| MV_Schw | A | 4626 | 171 | 7  | 0.378079694480341    |
| MV_Schw | G | 4627 | 455 | 23 | 0.000226008853973656 |
| MV_Schw | C | 4628 | 43  | 1  | 0.950262622850522    |
| MV_Schw | C | 4629 | 99  | 1  | 1                    |
| MV_Schw | A | 4630 | 8   | 1  | 0.258627633593378    |
| MV_Schw | C | 4631 | 581 | 15 | 0.797337167576434    |
| MV_Schw | C | 4632 | 128 | 6  | 0.245197580731582    |
| MV_Schw | C | 4633 | 182 | 4  | 1                    |
| MV_Schw | C | 4634 | 83  | 3  | 0.897349285586955    |
| MV_Schw | A | 4635 | 56  | 2  | 0.968890372475178    |
| MV_Schw | A | 4636 | 50  | 2  | 0.746970975838775    |
| MV_Schw | T | 4637 | 264 | 5  | 1                    |
| MV_Schw | C | 4638 | 229 | 5  | 1                    |
| MV_Schw | T | 4639 | 74  | 2  | 1                    |
| MV_Schw | G | 4640 | 101 | 3  | 1                    |
| MV_Schw | C | 4641 | 171 | 5  | 1                    |
| MV_Schw | A | 4642 | 209 | 5  | 1                    |

|         |   |      |     |    |                    |   |
|---------|---|------|-----|----|--------------------|---|
| MV_Schw | T | 4643 | 25  | 1  |                    | 1 |
| MV_Schw | C | 4644 | 14  | 1  | 0.426789350155389  |   |
| MV_Schw | C | 4645 | 27  | 1  | 0.752394317790241  |   |
| MV_Schw | T | 4646 | 10  | 0  |                    | 1 |
| MV_Schw | C | 4647 | 31  | 0  |                    | 1 |
| MV_Schw | C | 4648 | 314 | 9  | 0.667074763107836  |   |
| MV_Schw | T | 4649 | 2   | 0  |                    | 1 |
| MV_Schw | C | 4650 | 35  | 0  |                    | 1 |
| MV_Schw | G | 4651 | 134 | 3  |                    | 1 |
| MV_Schw | T | 4652 | 33  | 1  | 0.822598489333375  |   |
| MV_Schw | G | 4653 | 78  | 1  |                    | 1 |
| MV_Schw | G | 4654 | 54  | 0  | 0.950262622850522  |   |
| MV_Schw | G | 4655 | 35  | 3  | 0.222002676269896  |   |
| MV_Schw | A | 4656 | 2   | 0  |                    | 1 |
| MV_Schw | C | 4657 | 14  | 0  |                    | 1 |
| MV_Schw | C | 4658 | 14  | 0  |                    | 1 |
| MV_Schw | C | 4659 | 12  | 0  |                    | 1 |
| MV_Schw | C | 4660 | 120 | 4  | 0.813457243243208  |   |
| MV_Schw | C | 4661 | 120 | 1  |                    | 1 |
| MV_Schw | G | 4662 | 174 | 5  |                    | 1 |
| MV_Schw | A | 4663 | 17  | 0  |                    | 1 |
| MV_Schw | G | 4664 | 233 | 9  | 0.307480793677112  |   |
| MV_Schw | G | 4665 | 19  | 0  |                    | 1 |
| MV_Schw | A | 4666 | 2   | 0  |                    | 1 |
| MV_Schw | C | 4667 | 72  | 3  | 0.822598489333375  |   |
| MV_Schw | C | 4668 | 39  | 1  |                    | 1 |
| MV_Schw | A | 4669 | 83  | 3  | 0.678058690427187  |   |
| MV_Schw | A | 4670 | 10  | 1  | 0.822598489333375  |   |
| MV_Schw | C | 4671 | 134 | 7  | 0.111492774142499  |   |
| MV_Schw | C | 4672 | 79  | 2  |                    | 1 |
| MV_Schw | C | 4673 | 41  | 1  | 0.945767847051808  |   |
| MV_Schw | C | 4674 | 50  | 1  |                    | 1 |
| MV_Schw | C | 4675 | 79  | 2  |                    | 1 |
| MV_Schw | A | 4676 | 107 | 3  | 0.950262622850522  |   |
| MV_Schw | A | 4677 | 76  | 3  | 0.849410970830975  |   |
| MV_Schw | G | 4678 | 316 | 14 | 0.0232259801156287 |   |

|         |   |      |     |    |                      |   |
|---------|---|------|-----|----|----------------------|---|
| MV_Schw | G | 4679 | 23  | 1  |                      | 1 |
| MV_Schw | C | 4680 | 56  | 3  | 0.258627633593378    |   |
| MV_Schw | T | 4681 | 8   | 0  |                      | 1 |
| MV_Schw | G | 4682 | 285 | 9  | 0.638894311640422    |   |
| MV_Schw | C | 4683 | 500 | 14 | 0.67373476456738     |   |
| MV_Schw | C | 4684 | 434 | 15 | 0.237817203872315    |   |
| MV_Schw | C | 4685 | 225 | 10 | 0.0975104748468945   |   |
| MV_Schw | C | 4686 | 184 | 7  | 0.433235736187116    |   |
| MV_Schw | C | 4687 | 39  | 1  | 0.9314909603024      |   |
| MV_Schw | G | 4688 | 269 | 9  | 0.384498975392725    |   |
| MV_Schw | A | 4689 | 250 | 15 | 0.000264791698893959 |   |
| MV_Schw | T | 4690 | 256 | 13 | 0.0131040780293563   |   |
| MV_Schw | C | 4691 | 23  | 2  | 0.296710762771661    |   |
| MV_Schw | C | 4692 | 155 | 5  | 0.628561029435961    |   |
| MV_Schw | A | 4693 | 52  | 7  | 0.000436446431384331 |   |
| MV_Schw | A | 4694 | 25  | 1  | 0.704667204683568    |   |
| MV_Schw | A | 4695 | 601 | 36 | 3.00156077191385e-09 |   |
| MV_Schw | C | 4696 | 178 | 9  | 0.0285457257256843   |   |
| MV_Schw | C | 4697 | 120 | 3  | 0.97940134364504     |   |
| MV_Schw | A | 4698 | 10  | 1  | 0.822598489333375    |   |
| MV_Schw | C | 4699 | 134 | 5  | 0.704667204683568    |   |
| MV_Schw | C | 4700 | 130 | 5  | 0.68615038702224     |   |
| MV_Schw | A | 4701 | 43  | 1  | 0.950262622850522    |   |
| MV_Schw | A | 4702 | 41  | 1  | 0.945767847051808    |   |
| MV_Schw | C | 4703 | 234 | 13 | 0.00202421584354928  |   |
| MV_Schw | C | 4704 | 217 | 8  | 0.380027812845055    |   |
| MV_Schw | G | 4705 | 163 | 8  | 0.0975104748468945   |   |
| MV_Schw | C | 4706 | 114 | 8  | 0.00761599661714649  |   |
| MV_Schw | A | 4707 | 167 | 5  | 0.789229943133706    |   |
| MV_Schw | T | 4708 | 37  | 1  | 0.88950624150852     |   |
| MV_Schw | C | 4709 | 39  | 1  |                      | 1 |
| MV_Schw | C | 4710 | 56  | 5  | 0.0364706341145788   |   |
| MV_Schw | C | 4711 | 81  | 4  | 0.305908359426921    |   |
| MV_Schw | C | 4712 | 101 | 3  |                      | 1 |
| MV_Schw | A | 4713 | 128 | 9  | 0.00612561056885518  |   |
| MV_Schw | C | 4714 | 93  | 3  | 0.747390316041078    |   |

|         |   |      |     |    |                     |
|---------|---|------|-----|----|---------------------|
| MV_Schw | C | 4715 | 60  | 2  | 0.983041048229953   |
| MV_Schw | A | 4716 | 2   | 0  | 1                   |
| MV_Schw | C | 4717 | 10  | 0  | 1                   |
| MV_Schw | C | 4718 | 10  | 0  | 1                   |
| MV_Schw | C | 4719 | 17  | 1  | 0.983041048229953   |
| MV_Schw | C | 4720 | 87  | 2  | 1                   |
| MV_Schw | C | 4721 | 60  | 1  | 1                   |
| MV_Schw | G | 4722 | 130 | 7  | 0.0437447203304695  |
| MV_Schw | G | 4723 | 89  | 8  | 0.00121559637070655 |
| MV_Schw | G | 4724 | 50  | 2  | 0.746970975838775   |
| MV_Schw | A | 4725 | 52  | 2  | 0.78354985902497    |
| MV_Schw | A | 4726 | 35  | 1  | 1                   |
| MV_Schw | A | 4727 | 16  | 0  | 1                   |
| MV_Schw | G | 4728 | 192 | 3  | 1                   |
| MV_Schw | A | 4729 | 4   | 1  | 0.619556855087002   |
| MV_Schw | A | 4730 | 12  | 0  | 1                   |
| MV_Schw | A | 4731 | 6   | 1  | 0.704667204683568   |
| MV_Schw | C | 4732 | 194 | 10 | 0.0346618020274977  |
| MV_Schw | C | 4733 | 14  | 1  | 0.944879389258477   |
| MV_Schw | C | 4734 | 31  | 1  | 1                   |
| MV_Schw | C | 4735 | 29  | 1  | 0.789229943133706   |
| MV_Schw | C | 4736 | 130 | 5  | 0.68615038702224    |
| MV_Schw | A | 4737 | 47  | 1  | 1                   |
| MV_Schw | G | 4738 | 58  | 5  | 0.0132175001443654  |
| MV_Schw | C | 4739 | 35  | 1  | 0.863499923807603   |
| MV_Schw | A | 4740 | 6   | 0  | 1                   |
| MV_Schw | A | 4741 | 37  | 5  | 0.00602944986032567 |
| MV_Schw | T | 4742 | 66  | 4  | 0.172896230358341   |
| MV_Schw | T | 4743 | 60  | 3  | 0.550155392537109   |
| MV_Schw | G | 4744 | 107 | 2  | 1                   |
| MV_Schw | G | 4745 | 43  | 1  | 0.950262622850522   |
| MV_Schw | A | 4746 | 52  | 2  | 0.78354985902497    |
| MV_Schw | A | 4747 | 50  | 1  | 1                   |
| MV_Schw | G | 4748 | 83  | 2  | 1                   |
| MV_Schw | G | 4749 | 19  | 2  | 0.224063006917908   |
| MV_Schw | C | 4750 | 99  | 6  | 0.0595788695726893  |

|         |   |      |     |    |                      |
|---------|---|------|-----|----|----------------------|
| MV_Schw | C | 4751 | 124 | 5  | 0.52558001665221     |
| MV_Schw | C | 4752 | 395 | 23 | 1.33569958929803e-05 |
| MV_Schw | C | 4753 | 267 | 11 | 0.0736918053828108   |
| MV_Schw | T | 4754 | 91  | 3  | 1                    |
| MV_Schw | C | 4755 | 110 | 5  | 0.44055837109039     |
| MV_Schw | C | 4756 | 169 | 6  | 0.513653266133726    |
| MV_Schw | C | 4757 | 122 | 5  | 0.337352366102426    |
| MV_Schw | C | 4758 | 58  | 3  | 0.281632101641278    |
| MV_Schw | C | 4759 | 295 | 7  | 1                    |
| MV_Schw | T | 4760 | 35  | 1  | 1                    |
| MV_Schw | C | 4761 | 120 | 2  | 1                    |
| MV_Schw | T | 4762 | 12  | 0  | 1                    |
| MV_Schw | T | 4763 | 14  | 0  | 1                    |
| MV_Schw | C | 4764 | 149 | 3  | 1                    |
| MV_Schw | C | 4765 | 194 | 5  | 1                    |
| MV_Schw | T | 4766 | 41  | 1  | 1                    |
| MV_Schw | C | 4767 | 109 | 1  | 0.947544583923452    |
| MV_Schw | A | 4768 | 10  | 1  | 0.822598489333375    |
| MV_Schw | A | 4769 | 14  | 0  | 1                    |
| MV_Schw | C | 4770 | 118 | 3  | 1                    |
| MV_Schw | A | 4771 | 10  | 0  | 1                    |
| MV_Schw | C | 4772 | 285 | 1  | 0.143982237788904    |
| MV_Schw | A | 4773 | 25  | 1  | 1                    |
| MV_Schw | A | 4774 | 0   | 0  | 1                    |
| MV_Schw | G | 4775 | 203 | 7  | 0.611250359612674    |
| MV_Schw | A | 4776 | 6   | 0  | 1                    |
| MV_Schw | A | 4777 | 25  | 0  | 1                    |
| MV_Schw | C | 4778 | 64  | 2  | 1                    |
| MV_Schw | T | 4779 | 21  | 0  | 1                    |
| MV_Schw | C | 4780 | 651 | 5  | 0.0461984428789535   |
| MV_Schw | C | 4781 | 159 | 4  | 1                    |
| MV_Schw | A | 4782 | 56  | 5  | 0.0111350404952786   |
| MV_Schw | C | 4783 | 89  | 3  | 0.944879389258477    |
| MV_Schw | A | 4784 | 50  | 1  | 1                    |
| MV_Schw | A | 4785 | 48  | 1  | 1                    |
| MV_Schw | C | 4786 | 469 | 5  | 0.307480793677112    |

|         |   |      |     |    |                     |   |
|---------|---|------|-----|----|---------------------|---|
| MV_Schw | C | 4787 | 112 | 2  |                     | 1 |
| MV_Schw | G | 4788 | 200 | 11 | 0.0135938542850198  |   |
| MV_Schw | A | 4789 | 33  | 1  |                     | 1 |
| MV_Schw | A | 4790 | 105 | 7  | 0.0119771148622735  |   |
| MV_Schw | C | 4791 | 141 | 9  | 0.00489944314148526 |   |
| MV_Schw | C | 4792 | 95  | 1  |                     | 1 |
| MV_Schw | G | 4793 | 446 | 1  | 0.00386997644741331 |   |
| MV_Schw | C | 4794 | 93  | 3  | 0.747390316041078   |   |
| MV_Schw | A | 4795 | 83  | 7  | 0.00259570773751748 |   |
| MV_Schw | C | 4796 | 41  | 1  |                     | 1 |
| MV_Schw | A | 4797 | 130 | 1  | 0.658415249679101   |   |
| MV_Schw | A | 4798 | 56  | 0  | 0.950262622850522   |   |
| MV_Schw | G | 4799 | 79  | 0  | 0.639207655977387   |   |
| MV_Schw | C | 4800 | 143 | 1  | 0.88950624150852    |   |
| MV_Schw | G | 4801 | 64  | 2  |                     | 1 |
| MV_Schw | A | 4802 | 50  | 0  | 0.950262622850522   |   |
| MV_Schw | C | 4803 | 374 | 9  |                     | 1 |
| MV_Schw | C | 4804 | 79  | 3  | 0.882548734849042   |   |
| MV_Schw | G | 4805 | 43  | 0  |                     | 1 |
| MV_Schw | A | 4806 | 76  | 3  | 0.467924584055268   |   |
| MV_Schw | G | 4807 | 109 | 1  |                     | 1 |
| MV_Schw | G | 4808 | 134 | 7  | 0.0510580112645721  |   |
| MV_Schw | T | 4809 | 16  | 0  |                     | 1 |
| MV_Schw | G | 4810 | 56  | 1  |                     | 1 |
| MV_Schw | A | 4811 | 6   | 1  | 0.704667204683568   |   |
| MV_Schw | C | 4812 | 324 | 12 | 0.174729318961785   |   |
| MV_Schw | C | 4813 | 141 | 3  |                     | 1 |
| MV_Schw | C | 4814 | 285 | 5  |                     | 1 |
| MV_Schw | A | 4815 | 50  | 1  |                     | 1 |
| MV_Schw | A | 4816 | 33  | 1  |                     | 1 |
| MV_Schw | C | 4817 | 293 | 7  |                     | 1 |
| MV_Schw | C | 4818 | 703 | 8  | 0.268084322703061   |   |
| MV_Schw | G | 4819 | 79  | 2  |                     | 1 |
| MV_Schw | C | 4820 | 630 | 6  | 0.131169001298059   |   |
| MV_Schw | A | 4821 | 126 | 2  |                     | 1 |
| MV_Schw | G | 4822 | 157 | 5  | 0.920592678174758   |   |

|         |   |      |     |    |                    |   |
|---------|---|------|-----|----|--------------------|---|
| MV_Schw | G | 4823 | 37  | 1  |                    | 1 |
| MV_Schw | C | 4824 | 78  | 2  |                    | 1 |
| MV_Schw | A | 4825 | 70  | 1  |                    | 1 |
| MV_Schw | T | 4826 | 54  | 1  |                    | 1 |
| MV_Schw | C | 4827 | 198 | 1  | 0.54661929710701   |   |
| MV_Schw | C | 4828 | 380 | 2  | 0.0518737301478137 |   |
| MV_Schw | G | 4829 | 362 | 7  |                    | 1 |
| MV_Schw | A | 4830 | 35  | 0  |                    | 1 |
| MV_Schw | C | 4831 | 533 | 12 |                    | 1 |
| MV_Schw | T | 4832 | 17  | 1  | 0.983041048229953  |   |
| MV_Schw | C | 4833 | 64  | 1  |                    | 1 |
| MV_Schw | C | 4834 | 167 | 1  | 0.788293646497135  |   |
| MV_Schw | C | 4835 | 74  | 3  | 0.831755077907185  |   |
| MV_Schw | T | 4836 | 101 | 1  | 0.944879389258477  |   |
| MV_Schw | A | 4837 | 99  | 1  |                    | 1 |
| MV_Schw | G | 4838 | 525 | 8  | 0.944879389258477  |   |
| MV_Schw | A | 4839 | 31  | 1  |                    | 1 |
| MV_Schw | C | 4840 | 217 | 1  | 0.355607115956135  |   |
| MV_Schw | A | 4841 | 62  | 1  |                    | 1 |
| MV_Schw | G | 4842 | 56  | 1  |                    | 1 |
| MV_Schw | A | 4843 | 140 | 3  |                    | 1 |
| MV_Schw | T | 4844 | 37  | 1  |                    | 1 |
| MV_Schw | C | 4845 | 568 | 9  |                    | 1 |
| MV_Schw | C | 4846 | 141 | 4  |                    | 1 |
| MV_Schw | T | 4847 | 41  | 0  |                    | 1 |
| MV_Schw | C | 4848 | 308 | 5  |                    | 1 |
| MV_Schw | T | 4849 | 287 | 6  |                    | 1 |
| MV_Schw | C | 4850 | 155 | 2  |                    | 1 |
| MV_Schw | T | 4851 | 29  | 1  |                    | 1 |
| MV_Schw | C | 4852 | 64  | 3  | 0.609091736782917  |   |
| MV_Schw | C | 4853 | 120 | 3  | 0.97940134364504   |   |
| MV_Schw | C | 4854 | 126 | 3  |                    | 1 |
| MV_Schw | C | 4855 | 434 | 9  |                    | 1 |
| MV_Schw | G | 4856 | 878 | 14 | 0.795198078226602  |   |
| MV_Schw | G | 4857 | 198 | 1  | 0.54661929710701   |   |
| MV_Schw | C | 4858 | 29  | 3  | 0.0435098404838992 |   |



|         |   |      |      |    |                     |   |
|---------|---|------|------|----|---------------------|---|
| MV_Schw | A | 4859 | 39   | 0  |                     | 1 |
| MV_Schw | A | 4860 | 23   | 1  |                     | 1 |
| MV_Schw | A | 4861 | 39   | 1  |                     | 1 |
| MV_Schw | C | 4862 | 23   | 0  |                     | 1 |
| MV_Schw | T | 4863 | 2    | 0  |                     | 1 |
| MV_Schw | A | 4864 | 4    | 0  |                     | 1 |
| MV_Schw | A | 4865 | 16   | 0  |                     | 1 |
| MV_Schw | A | 4866 | 83   | 3  | 0.678058690427187   |   |
| MV_Schw | C | 4867 | 461  | 7  |                     | 1 |
| MV_Schw | A | 4868 | 68   | 0  | 0.789229943133706   |   |
| MV_Schw | A | 4869 | 25   | 0  |                     | 1 |
| MV_Schw | A | 4870 | 17   | 1  | 0.983041048229953   |   |
| MV_Schw | A | 4871 | 6    | 0  |                     | 1 |
| MV_Schw | C | 4872 | 308  | 4  | 0.863499923807603   |   |
| MV_Schw | T | 4873 | 8    | 0  |                     | 1 |
| MV_Schw | T | 4874 | 2    | 0  |                     | 1 |
| MV_Schw | A | 4875 | 6    | 0  |                     | 1 |
| MV_Schw | G | 4876 | 58   | 1  |                     | 1 |
| MV_Schw | G | 4877 | 52   | 0  | 0.950262622850522   |   |
| MV_Schw | G | 4878 | 19   | 0  |                     | 1 |
| MV_Schw | C | 4879 | 4    | 0  |                     | 1 |
| MV_Schw | C | 4880 | 37   | 0  |                     | 1 |
| MV_Schw | A | 4881 | 66   | 1  |                     | 1 |
| MV_Schw | A | 4882 | 58   | 0  | 0.953489044526869   |   |
| MV_Schw | G | 4883 | 1155 | 9  | 0.00142759685902233 |   |
| MV_Schw | G | 4884 | 112  | 1  | 0.789229943133706   |   |
| MV_Schw | A | 4885 | 25   | 0  |                     | 1 |
| MV_Schw | A | 4886 | 14   | 1  | 0.944879389258477   |   |
| MV_Schw | C | 4887 | 331  | 3  | 0.560243889454362   |   |
| MV_Schw | A | 4888 | 52   | 1  |                     | 1 |
| MV_Schw | T | 4889 | 196  | 12 | 0.00187387758437221 |   |
| MV_Schw | A | 4890 | 45   | 1  |                     | 1 |
| MV_Schw | C | 4891 | 190  | 7  | 0.314611398059001   |   |
| MV_Schw | A | 4892 | 14   | 1  | 0.426789350155389   |   |
| MV_Schw | C | 4893 | 138  | 3  |                     | 1 |
| MV_Schw | A | 4894 | 180  | 3  |                     | 1 |

|         |   |      |     |    |                      |
|---------|---|------|-----|----|----------------------|
| MV_Schw | C | 4895 | 50  | 3  | 0.199842243730937    |
| MV_Schw | C | 4896 | 60  | 1  | 1                    |
| MV_Schw | C | 4897 | 70  | 3  | 0.819327818667335    |
| MV_Schw | A | 4898 | 233 | 2  | 0.635597763648708    |
| MV_Schw | A | 4899 | 74  | 3  | 0.831755077907185    |
| MV_Schw | C | 4900 | 316 | 6  | 1                    |
| MV_Schw | A | 4901 | 52  | 2  | 0.78354985902497     |
| MV_Schw | G | 4902 | 29  | 1  | 1                    |
| MV_Schw | A | 4903 | 10  | 0  | 1                    |
| MV_Schw | A | 4904 | 12  | 0  | 1                    |
| MV_Schw | C | 4905 | 388 | 11 | 0.656608479151341    |
| MV_Schw | C | 4906 | 83  | 1  | 1                    |
| MV_Schw | C | 4907 | 248 | 4  | 1                    |
| MV_Schw | A | 4908 | 10  | 0  | 1                    |
| MV_Schw | G | 4909 | 304 | 5  | 1                    |
| MV_Schw | A | 4910 | 76  | 1  | 1                    |
| MV_Schw | C | 4911 | 101 | 4  | 0.576193745443697    |
| MV_Schw | C | 4912 | 33  | 2  | 0.463720798159947    |
| MV_Schw | C | 4913 | 35  | 3  | 0.222002676269896    |
| MV_Schw | C | 4914 | 85  | 5  | 0.17325046551955     |
| MV_Schw | G | 4915 | 116 | 1  | 0.789229943133706    |
| MV_Schw | G | 4916 | 357 | 8  | 1                    |
| MV_Schw | C | 4917 | 116 | 3  | 0.957721317456694    |
| MV_Schw | C | 4918 | 47  | 0  | 1                    |
| MV_Schw | C | 4919 | 85  | 5  | 0.074997775457354    |
| MV_Schw | A | 4920 | 10  | 0  | 1                    |
| MV_Schw | C | 4921 | 165 | 13 | 9.30164319200951e-05 |
| MV_Schw | G | 4922 | 54  | 2  | 0.789229943133706    |
| MV_Schw | G | 4923 | 29  | 1  | 0.789229943133706    |
| MV_Schw | C | 4924 | 140 | 6  | 0.294236275018498    |
| MV_Schw | G | 4925 | 39  | 1  | 1                    |
| MV_Schw | C | 4926 | 141 | 5  | 0.742170203109886    |
| MV_Schw | C | 4927 | 171 | 11 | 0.00340359280054689  |
| MV_Schw | G | 4928 | 310 | 3  | 0.646034462647135    |
| MV_Schw | C | 4929 | 184 | 7  | 0.307432508150825    |
| MV_Schw | G | 4930 | 192 | 6  | 0.713780715109928    |

|         |   |      |     |    |                   |
|---------|---|------|-----|----|-------------------|
| MV_Schw | C | 4931 | 74  | 0  | 0.795198078226602 |
| MV_Schw | C | 4932 | 97  | 4  | 0.550155392537109 |
| MV_Schw | C | 4933 | 83  | 3  | 0.678058690427187 |
| MV_Schw | C | 4934 | 62  | 1  | 1                 |
| MV_Schw | C | 4935 | 171 | 5  | 1                 |
| MV_Schw | A | 4936 | 21  | 0  | 1                 |
| MV_Schw | A | 4937 | 8   | 0  | 1                 |
| MV_Schw | C | 4938 | 138 | 1  | 0.673422966374487 |
| MV_Schw | C | 4939 | 23  | 0  | 1                 |
| MV_Schw | C | 4940 | 19  | 0  | 1                 |
| MV_Schw | C | 4941 | 143 | 2  | 1                 |
| MV_Schw | C | 4942 | 320 | 11 | 0.300532688028531 |
| MV_Schw | G | 4943 | 190 | 6  | 0.704667204683568 |
| MV_Schw | A | 4944 | 47  | 1  | 1                 |
| MV_Schw | C | 4945 | 110 | 2  | 1                 |
| MV_Schw | A | 4946 | 8   | 0  | 1                 |
| MV_Schw | A | 4947 | 6   | 1  | 0.704667204683568 |
| MV_Schw | C | 4948 | 31  | 1  | 0.791667533131283 |
| MV_Schw | C | 4949 | 35  | 1  | 0.863499923807603 |
| MV_Schw | A | 4950 | 23  | 0  | 1                 |
| MV_Schw | G | 4951 | 48  | 0  | 0.950262622850522 |
| MV_Schw | A | 4952 | 27  | 0  | 1                 |
| MV_Schw | G | 4953 | 29  | 2  | 0.389821719583598 |
| MV_Schw | G | 4954 | 79  | 5  | 0.136235544776219 |
| MV_Schw | G | 4955 | 25  | 1  | 0.704667204683568 |
| MV_Schw | A | 4956 | 4   | 0  | 1                 |
| MV_Schw | G | 4957 | 27  | 0  | 1                 |
| MV_Schw | C | 4958 | 97  | 1  | 1                 |
| MV_Schw | C | 4959 | 99  | 1  | 1                 |
| MV_Schw | C | 4960 | 89  | 1  | 1                 |
| MV_Schw | C | 4961 | 33  | 0  | 1                 |
| MV_Schw | C | 4962 | 124 | 2  | 1                 |
| MV_Schw | A | 4963 | 89  | 1  | 1                 |
| MV_Schw | A | 4964 | 43  | 1  | 0.950262622850522 |
| MV_Schw | C | 4965 | 219 | 9  | 0.219241362997286 |
| MV_Schw | C | 4966 | 74  | 1  | 1                 |

|         |   |      |     |    |                    |   |
|---------|---|------|-----|----|--------------------|---|
| MV_Schw | A | 4967 | 14  | 0  |                    | 1 |
| MV_Schw | A | 4968 | 25  | 2  | 0.314611398059001  |   |
| MV_Schw | T | 4969 | 19  | 1  |                    | 1 |
| MV_Schw | C | 4970 | 54  | 1  |                    | 1 |
| MV_Schw | C | 4971 | 196 | 6  | 0.824452550323657  |   |
| MV_Schw | C | 4972 | 132 | 3  |                    | 1 |
| MV_Schw | G | 4973 | 277 | 6  |                    | 1 |
| MV_Schw | C | 4974 | 469 | 11 |                    | 1 |
| MV_Schw | C | 4975 | 186 | 1  | 0.655978174231774  |   |
| MV_Schw | G | 4976 | 110 | 6  | 0.0982183359341293 |   |
| MV_Schw | G | 4977 | 14  | 1  | 0.944879389258477  |   |
| MV_Schw | C | 4978 | 37  | 1  | 0.88950624150852   |   |
| MV_Schw | T | 4979 | 8   | 0  |                    | 1 |
| MV_Schw | C | 4980 | 16  | 1  | 0.483965165529824  |   |
| MV_Schw | C | 4981 | 23  | 1  | 0.658415249679101  |   |
| MV_Schw | C | 4982 | 23  | 3  | 0.0909615969432528 |   |
| MV_Schw | C | 4983 | 114 | 1  |                    | 1 |
| MV_Schw | C | 4984 | 37  | 2  | 0.528591092326266  |   |
| MV_Schw | G | 4985 | 31  | 3  | 0.172254498719137  |   |
| MV_Schw | G | 4986 | 48  | 3  | 0.390345857720356  |   |
| MV_Schw | T | 4987 | 6   | 1  | 0.704667204683568  |   |
| MV_Schw | G | 4988 | 10  | 0  |                    | 1 |
| MV_Schw | C | 4989 | 27  | 0  |                    | 1 |
| MV_Schw | C | 4990 | 37  | 0  |                    | 1 |
| MV_Schw | C | 4991 | 19  | 2  | 0.224063006917908  |   |
| MV_Schw | A | 4992 | 29  | 2  | 0.389821719583598  |   |
| MV_Schw | C | 4993 | 66  | 4  | 0.172896230358341  |   |
| MV_Schw | A | 4994 | 12  | 0  |                    | 1 |
| MV_Schw | G | 4995 | 41  | 3  | 0.297586725038221  |   |
| MV_Schw | G | 4996 | 41  | 4  | 0.0352099055398472 |   |
| MV_Schw | C | 4997 | 39  | 1  |                    | 1 |
| MV_Schw | A | 4998 | 23  | 1  |                    | 1 |
| MV_Schw | G | 4999 | 122 | 5  | 0.508699586088801  |   |
| MV_Schw | G | 5000 | 45  | 3  | 0.340185031164498  |   |
| MV_Schw | G | 5001 | 17  | 0  |                    | 1 |
| MV_Schw | A | 5002 | 10  | 0  |                    | 1 |

|         |   |      |     |    |                      |
|---------|---|------|-----|----|----------------------|
| MV_Schw | C | 5003 | 124 | 5  | 0.52558001665221     |
| MV_Schw | A | 5004 | 21  | 2  | 0.258627633593378    |
| MV_Schw | C | 5005 | 47  | 3  | 0.161503851613234    |
| MV_Schw | C | 5006 | 225 | 14 | 0.000482133731330682 |
| MV_Schw | A | 5007 | 29  | 1  | 0.789229943133706    |
| MV_Schw | A | 5008 | 47  | 1  | 1                    |
| MV_Schw | C | 5009 | 258 | 13 | 0.0138375166734294   |
| MV_Schw | C | 5010 | 203 | 7  | 0.611250359612674    |
| MV_Schw | C | 5011 | 244 | 11 | 0.0345805569340756   |
| MV_Schw | C | 5012 | 68  | 1  | 1                    |
| MV_Schw | C | 5013 | 126 | 3  | 1                    |
| MV_Schw | G | 5014 | 419 | 27 | 1.38993693318977e-07 |
| MV_Schw | A | 5015 | 159 | 11 | 0.00175689918262991  |
| MV_Schw | A | 5016 | 112 | 7  | 0.0469203899661715   |
| MV_Schw | C | 5017 | 172 | 8  | 0.118807949693111    |
| MV_Schw | A | 5018 | 21  | 2  | 0.258627633593378    |
| MV_Schw | G | 5019 | 39  | 1  | 0.9314909603024      |
| MV_Schw | A | 5020 | 6   | 0  | 1                    |
| MV_Schw | C | 5021 | 178 | 11 | 0.00510376459215064  |
| MV_Schw | C | 5022 | 128 | 9  | 0.00612561056885518  |
| MV_Schw | C | 5023 | 167 | 4  | 1                    |
| MV_Schw | A | 5024 | 138 | 5  | 0.717634251494108    |
| MV_Schw | G | 5025 | 64  | 1  | 1                    |
| MV_Schw | C | 5026 | 281 | 9  | 0.509396577320122    |
| MV_Schw | A | 5027 | 37  | 1  | 0.88950624150852     |
| MV_Schw | C | 5028 | 81  | 4  | 0.305908359426921    |
| MV_Schw | C | 5029 | 17  | 1  | 0.983041048229953    |
| MV_Schw | C | 5030 | 297 | 13 | 0.0643413556372622   |
| MV_Schw | A | 5031 | 31  | 1  | 1                    |
| MV_Schw | A | 5032 | 10  | 1  | 0.822598489333375    |
| MV_Schw | C | 5033 | 192 | 10 | 0.0337118011001659   |
| MV_Schw | C | 5034 | 14  | 1  | 0.944879389258477    |
| MV_Schw | A | 5035 | 25  | 0  | 1                    |
| MV_Schw | T | 5036 | 10  | 0  | 1                    |
| MV_Schw | C | 5037 | 314 | 6  | 1                    |
| MV_Schw | G | 5038 | 161 | 9  | 0.0315879311157858   |

|         |   |      |     |    |                     |
|---------|---|------|-----|----|---------------------|
| MV_Schw | A | 5039 | 17  | 1  | 0.983041048229953   |
| MV_Schw | C | 5040 | 163 | 11 | 0.00220335228624776 |
| MV_Schw | A | 5041 | 6   | 1  | 0.704667204683568   |
| MV_Schw | A | 5042 | 4   | 0  | 1                   |
| MV_Schw | T | 5043 | 12  | 0  | 1                   |
| MV_Schw | C | 5044 | 10  | 1  | 0.822598489333375   |
| MV_Schw | C | 5045 | 41  | 2  | 0.599534349993353   |
| MV_Schw | A | 5046 | 8   | 1  | 0.789229943133706   |
| MV_Schw | A | 5047 | 19  | 1  | 1                   |
| MV_Schw | G | 5048 | 293 | 11 | 0.260373447578035   |
| MV_Schw | A | 5049 | 2   | 1  | 0.491835918445353   |
| MV_Schw | C | 5050 | 37  | 5  | 0.00602944986032567 |
| MV_Schw | G | 5051 | 12  | 2  | 0.0975104748468945  |
| MV_Schw | G | 5052 | 37  | 1  | 1                   |
| MV_Schw | G | 5053 | 78  | 0  | 0.638894311640422   |
| MV_Schw | G | 5054 | 17  | 1  | 0.983041048229953   |
| MV_Schw | G | 5055 | 25  | 1  | 1                   |
| MV_Schw | G | 5056 | 25  | 0  | 1                   |
| MV_Schw | G | 5057 | 37  | 0  | 1                   |
| MV_Schw | C | 5058 | 25  | 1  | 0.704667204683568   |
| MV_Schw | C | 5059 | 25  | 1  | 1                   |
| MV_Schw | C | 5060 | 14  | 0  | 1                   |
| MV_Schw | C | 5061 | 23  | 2  | 0.296710762771661   |
| MV_Schw | C | 5062 | 41  | 1  | 0.945767847051808   |
| MV_Schw | C | 5063 | 12  | 0  | 1                   |
| MV_Schw | C | 5064 | 72  | 3  | 0.822598489333375   |
| MV_Schw | A | 5065 | 43  | 1  | 0.950262622850522   |
| MV_Schw | A | 5066 | 72  | 2  | 1                   |
| MV_Schw | A | 5067 | 33  | 2  | 0.463720798159947   |
| MV_Schw | A | 5068 | 14  | 0  | 1                   |
| MV_Schw | A | 5069 | 16  | 0  | 1                   |
| MV_Schw | A | 5070 | 27  | 0  | 1                   |
| MV_Schw | A | 5071 | 2   | 0  | 1                   |
| MV_Schw | G | 5072 | 29  | 0  | 1                   |
| MV_Schw | G | 5073 | 2   | 0  | 1                   |
| MV_Schw | C | 5074 | 8   | 0  | 1                   |

|         |   |      |     |   |                   |
|---------|---|------|-----|---|-------------------|
| MV_Schw | C | 5075 | 6   | 0 | 1                 |
| MV_Schw | C | 5076 | 23  | 0 | 1                 |
| MV_Schw | C | 5077 | 19  | 0 | 1                 |
| MV_Schw | C | 5078 | 66  | 1 | 1                 |
| MV_Schw | A | 5079 | 4   | 0 | 1                 |
| MV_Schw | G | 5080 | 25  | 0 | 1                 |
| MV_Schw | G | 5081 | 19  | 1 | 0.57780206681461  |
| MV_Schw | G | 5082 | 31  | 2 | 0.428411386231373 |
| MV_Schw | G | 5083 | 43  | 2 | 0.632968068765344 |
| MV_Schw | C | 5084 | 260 | 5 | 1                 |
| MV_Schw | C | 5085 | 118 | 5 | 0.491835918445353 |
| MV_Schw | G | 5086 | 39  | 1 | 0.9314909603024   |
| MV_Schw | A | 5087 | 19  | 1 | 0.57780206681461  |
| MV_Schw | C | 5088 | 79  | 5 | 0.136235544776219 |
| MV_Schw | A | 5089 | 6   | 0 | 1                 |
| MV_Schw | G | 5090 | 97  | 4 | 0.550155392537109 |
| MV_Schw | C | 5091 | 37  | 2 | 0.528591092326266 |
| MV_Schw | C | 5092 | 16  | 1 | 0.483965165529824 |
| MV_Schw | A | 5093 | 48  | 1 | 1                 |
| MV_Schw | G | 5094 | 21  | 0 | 1                 |
| MV_Schw | C | 5095 | 25  | 1 | 0.704667204683568 |
| MV_Schw | A | 5096 | 14  | 1 | 0.944879389258477 |
| MV_Schw | C | 5097 | 120 | 2 | 1                 |
| MV_Schw | C | 5098 | 167 | 3 | 1                 |
| MV_Schw | G | 5099 | 103 | 1 | 0.944879389258477 |
| MV_Schw | C | 5100 | 147 | 3 | 1                 |
| MV_Schw | G | 5101 | 138 | 1 | 0.673422966374487 |
| MV_Schw | A | 5102 | 70  | 1 | 1                 |
| MV_Schw | G | 5103 | 62  | 1 | 1                 |
| MV_Schw | G | 5104 | 105 | 3 | 1                 |
| MV_Schw | A | 5105 | 12  | 0 | 1                 |
| MV_Schw | A | 5106 | 112 | 3 | 0.950262622850522 |
| MV_Schw | G | 5107 | 79  | 2 | 1                 |
| MV_Schw | C | 5108 | 196 | 7 | 0.57780206681461  |
| MV_Schw | C | 5109 | 122 | 3 | 0.983041048229953 |
| MV_Schw | C | 5110 | 217 | 6 | 0.969676682971856 |

|         |   |      |     |    |                   |   |
|---------|---|------|-----|----|-------------------|---|
| MV_Schw | A | 5111 | 101 | 4  | 0.576193745443697 |   |
| MV_Schw | C | 5112 | 188 | 7  | 0.307480793677112 |   |
| MV_Schw | C | 5113 | 186 | 2  | 0.948552432136014 |   |
| MV_Schw | C | 5114 | 91  | 5  | 0.217911555108928 |   |
| MV_Schw | A | 5115 | 47  | 1  |                   | 1 |
| MV_Schw | C | 5116 | 56  | 3  | 0.258627633593378 |   |
| MV_Schw | C | 5117 | 159 | 3  |                   | 1 |
| MV_Schw | C | 5118 | 295 | 6  |                   | 1 |
| MV_Schw | C | 5119 | 211 | 3  | 0.957721317456694 |   |
| MV_Schw | A | 5120 | 10  | 0  |                   | 1 |
| MV_Schw | C | 5121 | 293 | 7  |                   | 1 |
| MV_Schw | A | 5122 | 31  | 2  | 0.428411386231373 |   |
| MV_Schw | C | 5123 | 285 | 7  |                   | 1 |
| MV_Schw | A | 5124 | 23  | 1  |                   | 1 |
| MV_Schw | C | 5125 | 93  | 3  |                   | 1 |
| MV_Schw | G | 5126 | 62  | 1  |                   | 1 |
| MV_Schw | A | 5127 | 16  | 0  |                   | 1 |
| MV_Schw | C | 5128 | 242 | 5  |                   | 1 |
| MV_Schw | C | 5129 | 78  | 2  |                   | 1 |
| MV_Schw | A | 5130 | 76  | 1  |                   | 1 |
| MV_Schw | C | 5131 | 657 | 9  | 0.701952036287806 |   |
| MV_Schw | G | 5132 | 97  | 2  |                   | 1 |
| MV_Schw | G | 5133 | 56  | 1  |                   | 1 |
| MV_Schw | C | 5134 | 54  | 0  | 0.950262622850522 |   |
| MV_Schw | A | 5135 | 48  | 1  |                   | 1 |
| MV_Schw | A | 5136 | 37  | 1  | 0.88950624150852  |   |
| MV_Schw | C | 5137 | 136 | 6  | 0.275653222293987 |   |
| MV_Schw | C | 5138 | 64  | 1  |                   | 1 |
| MV_Schw | A | 5139 | 17  | 1  | 0.983041048229953 |   |
| MV_Schw | A | 5140 | 8   | 1  | 0.789229943133706 |   |
| MV_Schw | A | 5141 | 29  | 0  |                   | 1 |
| MV_Schw | C | 5142 | 461 | 11 |                   | 1 |
| MV_Schw | C | 5143 | 107 | 3  |                   | 1 |
| MV_Schw | A | 5144 | 41  | 2  | 0.599534349993353 |   |
| MV_Schw | G | 5145 | 54  | 3  | 0.480219983992261 |   |
| MV_Schw | A | 5146 | 33  | 1  |                   | 1 |



|         |   |      |     |    |                    |   |
|---------|---|------|-----|----|--------------------|---|
| MV_Schw | A | 5147 | 33  | 1  |                    | 1 |
| MV_Schw | C | 5148 | 126 | 6  | 0.239137755983385  |   |
| MV_Schw | C | 5149 | 50  | 1  |                    | 1 |
| MV_Schw | C | 5150 | 79  | 3  | 0.658415249679101  |   |
| MV_Schw | A | 5151 | 52  | 1  |                    | 1 |
| MV_Schw | G | 5152 | 211 | 10 | 0.0498702425274631 |   |
| MV_Schw | A | 5153 | 31  | 1  |                    | 1 |
| MV_Schw | C | 5154 | 140 | 3  |                    | 1 |
| MV_Schw | C | 5155 | 17  | 1  | 0.983041048229953  |   |
| MV_Schw | A | 5156 | 0   | 0  |                    | 1 |
| MV_Schw | C | 5157 | 64  | 2  |                    | 1 |
| MV_Schw | C | 5158 | 14  | 0  |                    | 1 |
| MV_Schw | C | 5159 | 85  | 2  |                    | 1 |
| MV_Schw | T | 5160 | 29  | 0  |                    | 1 |
| MV_Schw | G | 5161 | 43  | 0  |                    | 1 |
| MV_Schw | G | 5162 | 122 | 2  |                    | 1 |
| MV_Schw | G | 5163 | 118 | 2  |                    | 1 |
| MV_Schw | C | 5164 | 62  | 1  |                    | 1 |
| MV_Schw | C | 5165 | 48  | 1  |                    | 1 |
| MV_Schw | A | 5166 | 19  | 0  |                    | 1 |
| MV_Schw | C | 5167 | 79  | 1  |                    | 1 |
| MV_Schw | C | 5168 | 58  | 0  | 0.953489044526869  |   |
| MV_Schw | A | 5169 | 39  | 1  | 0.9314909603024    |   |
| MV_Schw | G | 5170 | 37  | 0  |                    | 1 |
| MV_Schw | C | 5171 | 64  | 1  |                    | 1 |
| MV_Schw | T | 5172 | 33  | 0  |                    | 1 |
| MV_Schw | C | 5173 | 157 | 1  | 0.88950624150852   |   |
| MV_Schw | C | 5174 | 490 | 4  | 0.119365022975779  |   |
| MV_Schw | C | 5175 | 153 | 5  | 0.619556855087002  |   |
| MV_Schw | A | 5176 | 35  | 1  |                    | 1 |
| MV_Schw | G | 5177 | 190 | 3  |                    | 1 |
| MV_Schw | A | 5178 | 10  | 1  | 0.822598489333375  |   |
| MV_Schw | C | 5179 | 234 | 6  |                    | 1 |
| MV_Schw | T | 5180 | 19  | 1  |                    | 1 |
| MV_Schw | C | 5181 | 180 | 0  | 0.090192830807046  |   |
| MV_Schw | G | 5182 | 182 | 3  |                    | 1 |

|         |   |      |     |    |                    |   |
|---------|---|------|-----|----|--------------------|---|
| MV_Schw | G | 5183 | 140 | 2  |                    | 1 |
| MV_Schw | C | 5184 | 547 | 7  | 0.702570843947246  |   |
| MV_Schw | C | 5185 | 145 | 0  | 0.161503851613234  |   |
| MV_Schw | A | 5186 | 21  | 1  |                    | 1 |
| MV_Schw | T | 5187 | 16  | 1  | 0.950262622850522  |   |
| MV_Schw | C | 5188 | 17  | 1  | 0.983041048229953  |   |
| MV_Schw | A | 5189 | 109 | 1  | 0.947544583923452  |   |
| MV_Schw | C | 5190 | 79  | 3  | 0.882548734849042  |   |
| MV_Schw | C | 5191 | 19  | 1  | 0.57780206681461   |   |
| MV_Schw | C | 5192 | 58  | 1  |                    | 1 |
| MV_Schw | C | 5193 | 54  | 1  |                    | 1 |
| MV_Schw | G | 5194 | 118 | 2  |                    | 1 |
| MV_Schw | C | 5195 | 130 | 3  |                    | 1 |
| MV_Schw | A | 5196 | 56  | 0  | 0.950262622850522  |   |
| MV_Schw | G | 5197 | 72  | 2  |                    | 1 |
| MV_Schw | A | 5198 | 21  | 0  |                    | 1 |
| MV_Schw | A | 5199 | 17  | 0  |                    | 1 |
| MV_Schw | A | 5200 | 19  | 1  | 0.57780206681461   |   |
| MV_Schw | G | 5201 | 452 | 8  |                    | 1 |
| MV_Schw | G | 5202 | 76  | 0  | 0.638894311640422  |   |
| MV_Schw | A | 5203 | 124 | 3  |                    | 1 |
| MV_Schw | A | 5204 | 83  | 1  |                    | 1 |
| MV_Schw | A | 5205 | 33  | 1  | 0.822598489333375  |   |
| MV_Schw | G | 5206 | 56  | 1  |                    | 1 |
| MV_Schw | G | 5207 | 118 | 3  |                    | 1 |
| MV_Schw | C | 5208 | 411 | 12 | 0.60313822504384   |   |
| MV_Schw | C | 5209 | 205 | 7  | 0.619556855087002  |   |
| MV_Schw | A | 5210 | 35  | 1  | 0.863499923807603  |   |
| MV_Schw | C | 5211 | 163 | 7  | 0.275653222293987  |   |
| MV_Schw | A | 5212 | 66  | 3  | 0.633417216184605  |   |
| MV_Schw | A | 5213 | 6   | 1  | 0.704667204683568  |   |
| MV_Schw | C | 5214 | 138 | 8  | 0.0263854082581312 |   |
| MV_Schw | C | 5215 | 112 | 3  |                    | 1 |
| MV_Schw | C | 5216 | 252 | 8  | 0.580283780096167  |   |
| MV_Schw | G | 5217 | 254 | 8  | 0.590783453867014  |   |
| MV_Schw | C | 5218 | 436 | 11 | 0.88950624150852   |   |

|         |   |      |     |    |                    |
|---------|---|------|-----|----|--------------------|
| MV_Schw | G | 5219 | 300 | 10 | 0.44055837109039   |
| MV_Schw | C | 5220 | 39  | 0  | 1                  |
| MV_Schw | A | 5221 | 33  | 1  | 1                  |
| MV_Schw | C | 5222 | 17  | 0  | 1                  |
| MV_Schw | C | 5223 | 16  | 0  | 1                  |
| MV_Schw | C | 5224 | 136 | 5  | 0.707150586447893  |
| MV_Schw | C | 5225 | 10  | 0  | 1                  |
| MV_Schw | A | 5226 | 14  | 0  | 1                  |
| MV_Schw | G | 5227 | 99  | 3  | 1                  |
| MV_Schw | C | 5228 | 95  | 2  | 1                  |
| MV_Schw | C | 5229 | 120 | 3  | 1                  |
| MV_Schw | C | 5230 | 48  | 0  | 0.950262622850522  |
| MV_Schw | C | 5231 | 19  | 0  | 1                  |
| MV_Schw | G | 5232 | 47  | 4  | 0.0561491488986917 |
| MV_Schw | A | 5233 | 25  | 2  | 0.314611398059001  |
| MV_Schw | T | 5234 | 19  | 1  | 1                  |
| MV_Schw | C | 5235 | 79  | 1  | 1                  |
| MV_Schw | C | 5236 | 180 | 6  | 0.670827466361185  |
| MV_Schw | G | 5237 | 39  | 0  | 1                  |
| MV_Schw | G | 5238 | 48  | 3  | 0.390345857720356  |
| MV_Schw | C | 5239 | 481 | 7  | 0.957721317456694  |
| MV_Schw | G | 5240 | 72  | 1  | 1                  |
| MV_Schw | G | 5241 | 83  | 3  | 0.678058690427187  |
| MV_Schw | G | 5242 | 14  | 0  | 1                  |
| MV_Schw | G | 5243 | 79  | 2  | 1                  |
| MV_Schw | A | 5244 | 12  | 2  | 0.0975104748468945 |
| MV_Schw | G | 5245 | 78  | 1  | 1                  |
| MV_Schw | C | 5246 | 16  | 1  | 0.950262622850522  |
| MV_Schw | C | 5247 | 68  | 1  | 1                  |
| MV_Schw | A | 5248 | 85  | 1  | 1                  |
| MV_Schw | C | 5249 | 267 | 4  | 1                  |
| MV_Schw | C | 5250 | 124 | 3  | 1                  |
| MV_Schw | C | 5251 | 37  | 1  | 1                  |
| MV_Schw | A | 5252 | 35  | 1  | 0.863499923807603  |
| MV_Schw | A | 5253 | 39  | 1  | 1                  |
| MV_Schw | C | 5254 | 430 | 8  | 1                  |

|         |   |      |     |    |                    |
|---------|---|------|-----|----|--------------------|
| MV_Schw | C | 5255 | 122 | 4  | 0.822598489333375  |
| MV_Schw | C | 5256 | 380 | 5  | 0.741962752056172  |
| MV_Schw | G | 5257 | 132 | 2  | 1                  |
| MV_Schw | A | 5258 | 50  | 1  | 1                  |
| MV_Schw | A | 5259 | 126 | 3  | 1                  |
| MV_Schw | C | 5260 | 473 | 15 | 0.403357831658547  |
| MV_Schw | C | 5261 | 240 | 6  | 1                  |
| MV_Schw | A | 5262 | 23  | 1  | 1                  |
| MV_Schw | G | 5263 | 39  | 1  | 1                  |
| MV_Schw | C | 5264 | 159 | 5  | 0.639207655977387  |
| MV_Schw | A | 5265 | 31  | 1  | 0.791667533131283  |
| MV_Schw | C | 5266 | 27  | 0  | 1                  |
| MV_Schw | C | 5267 | 194 | 7  | 0.573345528574631  |
| MV_Schw | C | 5268 | 37  | 0  | 1                  |
| MV_Schw | A | 5269 | 47  | 2  | 0.678058690427187  |
| MV_Schw | A | 5270 | 21  | 1  | 1                  |
| MV_Schw | G | 5271 | 578 | 16 | 0.655560787067853  |
| MV_Schw | A | 5272 | 14  | 1  | 0.944879389258477  |
| MV_Schw | G | 5273 | 188 | 9  | 0.0529105666346528 |
| MV_Schw | C | 5274 | 221 | 6  | 0.979210967390135  |
| MV_Schw | G | 5275 | 56  | 1  | 1                  |
| MV_Schw | A | 5276 | 39  | 0  | 1                  |
| MV_Schw | T | 5277 | 37  | 1  | 0.88950624150852   |
| MV_Schw | C | 5278 | 171 | 3  | 1                  |
| MV_Schw | C | 5279 | 47  | 1  | 1                  |
| MV_Schw | C | 5280 | 68  | 2  | 1                  |
| MV_Schw | C | 5281 | 194 | 5  | 0.950262622850522  |
| MV_Schw | G | 5282 | 347 | 11 | 0.419231414474137  |
| MV_Schw | A | 5283 | 47  | 1  | 1                  |
| MV_Schw | A | 5284 | 89  | 5  | 0.201986157592846  |
| MV_Schw | G | 5285 | 95  | 5  | 0.244569722692791  |
| MV_Schw | G | 5286 | 21  | 1  | 1                  |
| MV_Schw | A | 5287 | 0   | 0  | 1                  |
| MV_Schw | C | 5288 | 33  | 1  | 1                  |
| MV_Schw | C | 5289 | 140 | 7  | 0.0646746182830778 |
| MV_Schw | C | 5290 | 107 | 5  | 0.181053376647436  |

|         |    |      |     |    |                      |
|---------|----|------|-----|----|----------------------|
| MV_Schw | C  | 5291 | 254 | 17 | 1.53981691668859e-05 |
| MV_Schw | C  | 5292 | 405 | 27 | 2.20143231679584e-08 |
| MV_Schw | G  | 5293 | 300 | 16 | 0.00159263226487359  |
| MV_Schw | A  | 5294 | 33  | 3  | 0.197209929577240    |
| MV_Schw | A  | 5295 | 70  | 2  | 1                    |
| MV_Schw | C  | 5296 | 428 | 35 | 1.27531117220815e-13 |
| MV_Schw | C  | 5297 | 171 | 6  | 0.52558001665221     |
| MV_Schw | G  | 5298 | 107 | 5  | 0.181053376647436    |
| MV_Schw | C  | 5299 | 56  | 5  | 0.0111350404952786   |
| MV_Schw | A  | 5300 | 132 | 10 | 0.00089267821530273  |
| MV_Schw | A  | 5301 | 56  | 3  | 0.499662168427985    |
| MV_Schw | A  | 5302 | 138 | 7  | 0.0603533834492057   |
| MV_Schw | G  | 5303 | 238 | 11 | 0.0742595711479845   |
| MV_Schw | G  | 5304 | 37  | 1  | 0.88950624150852     |
| MV_Schw | NA | 5305 | 0   | 0  | NA                   |
| MV_Schw | C  | 5306 | 266 | 9  | 0.497615650989996    |
| MV_Schw | A  | 5307 | 70  | 7  | 0.000736926840199571 |
| MV_Schw | T  | 5308 | 103 | 4  | 0.588995992242088    |
| MV_Schw | C  | 5309 | 161 | 5  | 0.646149988917053    |
| MV_Schw | A  | 5310 | 21  | 0  | 1                    |
| MV_Schw | G  | 5311 | 322 | 12 | 0.171286508240332    |
| MV_Schw | T  | 5312 | 19  | 1  | 0.57780206681461     |
| MV_Schw | A  | 5313 | 126 | 5  | 0.35554222034638     |
| MV_Schw | T  | 5314 | 8   | 0  | 1                    |
| MV_Schw | C  | 5315 | 45  | 1  | 1                    |
| MV_Schw | C  | 5316 | 58  | 3  | 0.528591092326266    |
| MV_Schw | C  | 5317 | 380 | 14 | 0.134114285746905    |
| MV_Schw | A  | 5318 | 21  | 1  | 1                    |
| MV_Schw | C  | 5319 | 178 | 5  | 0.804012574266476    |
| MV_Schw | A  | 5320 | 109 | 0  | 0.381672248067152    |
| MV_Schw | G  | 5321 | 105 | 2  | 1                    |
| MV_Schw | C  | 5322 | 33  | 0  | 1                    |
| MV_Schw | C  | 5323 | 21  | 0  | 1                    |
| MV_Schw | T  | 5324 | 23  | 0  | 1                    |
| MV_Schw | C  | 5325 | 149 | 1  | 0.88950624150852     |
| MV_Schw | T  | 5326 | 95  | 1  | 1                    |

|         |   |      |     |    |                   |
|---------|---|------|-----|----|-------------------|
| MV_Schw | C | 5327 | 97  | 1  | 0.944879389258477 |
| MV_Schw | C | 5328 | 196 | 3  | 1                 |
| MV_Schw | A | 5329 | 114 | 1  | 1                 |
| MV_Schw | A | 5330 | 45  | 0  | 1                 |
| MV_Schw | G | 5331 | 471 | 11 | 1                 |
| MV_Schw | T | 5332 | 12  | 0  | 1                 |
| MV_Schw | C | 5333 | 116 | 4  | 0.795434284511944 |
| MV_Schw | C | 5334 | 262 | 2  | 0.44055837109039  |
| MV_Schw | C | 5335 | 267 | 6  | 1                 |
| MV_Schw | C | 5336 | 388 | 8  | 1                 |
| MV_Schw | C | 5337 | 87  | 1  | 1                 |
| MV_Schw | G | 5338 | 134 | 5  | 0.704667204683568 |
| MV_Schw | G | 5339 | 95  | 1  | 1                 |
| MV_Schw | T | 5340 | 6   | 0  | 1                 |
| MV_Schw | C | 5341 | 47  | 3  | 0.366637777073510 |
| MV_Schw | T | 5342 | 8   | 0  | 1                 |
| MV_Schw | C | 5343 | 10  | 0  | 1                 |
| MV_Schw | C | 5344 | 48  | 0  | 0.950262622850522 |
| MV_Schw | T | 5345 | 19  | 1  | 0.57780206681461  |
| MV_Schw | C | 5346 | 16  | 0  | 1                 |
| MV_Schw | C | 5347 | 87  | 1  | 1                 |
| MV_Schw | T | 5348 | 10  | 0  | 1                 |
| MV_Schw | C | 5349 | 31  | 1  | 0.791667533131283 |
| MV_Schw | T | 5350 | 2   | 0  | 1                 |
| MV_Schw | T | 5351 | 12  | 1  | 0.366832525336205 |
| MV_Schw | C | 5352 | 141 | 1  | 0.989441011726102 |
| MV_Schw | T | 5353 | 2   | 0  | 1                 |
| MV_Schw | C | 5354 | 29  | 1  | 1                 |
| MV_Schw | G | 5355 | 68  | 1  | 1                 |
| MV_Schw | A | 5356 | 8   | 0  | 1                 |
| MV_Schw | A | 5357 | 19  | 0  | 1                 |
| MV_Schw | G | 5358 | 25  | 0  | 1                 |
| MV_Schw | G | 5359 | 8   | 1  | 0.789229943133706 |
| MV_Schw | G | 5360 | 12  | 1  | 0.88950624150852  |
| MV_Schw | A | 5361 | 2   | 0  | 1                 |
| MV_Schw | C | 5362 | 33  | 1  | 0.822598489333375 |

|         |   |      |      |    |                      |   |
|---------|---|------|------|----|----------------------|---|
| MV_Schw | C | 5363 | 64   | 2  |                      | 1 |
| MV_Schw | A | 5364 | 66   | 0  | 0.789229943133706    |   |
| MV_Schw | A | 5365 | 48   | 1  |                      | 1 |
| MV_Schw | A | 5366 | 25   | 0  |                      | 1 |
| MV_Schw | A | 5367 | 229  | 7  | 0.88950624150852     |   |
| MV_Schw | G | 5368 | 461  | 11 |                      | 1 |
| MV_Schw | A | 5369 | 10   | 0  |                      | 1 |
| MV_Schw | T | 5370 | 76   | 1  |                      | 1 |
| MV_Schw | C | 5371 | 174  | 8  | 0.121832950892168    |   |
| MV_Schw | A | 5372 | 48   | 2  | 0.709032941865358    |   |
| MV_Schw | A | 5373 | 105  | 2  |                      | 1 |
| MV_Schw | T | 5374 | 68   | 1  |                      | 1 |
| MV_Schw | C | 5375 | 221  | 4  |                      | 1 |
| MV_Schw | C | 5376 | 74   | 2  |                      | 1 |
| MV_Schw | A | 5377 | 29   | 1  |                      | 1 |
| MV_Schw | C | 5378 | 477  | 15 | 0.409756495839402    |   |
| MV_Schw | C | 5379 | 364  | 13 | 0.164331455962041    |   |
| MV_Schw | A | 5380 | 0    | 0  |                      | 1 |
| MV_Schw | C | 5381 | 176  | 1  | 0.34703042205032     |   |
| MV_Schw | A | 5382 | 0    | 0  |                      | 1 |
| MV_Schw | C | 5383 | 79   | 1  |                      | 1 |
| MV_Schw | C | 5384 | 74   | 1  |                      | 1 |
| MV_Schw | C | 5385 | 595  | 4  | 0.0221470025606877   |   |
| MV_Schw | G | 5386 | 436  | 19 | 0.0107100288915592   |   |
| MV_Schw | A | 5387 | 202  | 3  |                      | 1 |
| MV_Schw | C | 5388 | 1068 | 36 | 0.0128931107387079   |   |
| MV_Schw | G | 5389 | 99   | 7  | 0.0233447269367489   |   |
| MV_Schw | A | 5390 | 4    | 1  | 0.136107188572645    |   |
| MV_Schw | C | 5391 | 293  | 10 | 0.342651296301386    |   |
| MV_Schw | A | 5392 | 16   | 1  | 0.950262622850522    |   |
| MV_Schw | C | 5393 | 169  | 5  | 0.945767847051808    |   |
| MV_Schw | T | 5394 | 8    | 1  | 0.258627633593378    |   |
| MV_Schw | C | 5395 | 134  | 7  | 0.111492774142499    |   |
| MV_Schw | A | 5396 | 141  | 8  | 0.0316424857945862   |   |
| MV_Schw | A | 5397 | 16   | 1  | 0.483965165529824    |   |
| MV_Schw | C | 5398 | 564  | 45 | 2.51309636025964e-16 |   |

|         |   |      |     |    |                      |
|---------|---|------|-----|----|----------------------|
| MV_Schw | T | 5399 | 41  | 1  | 1                    |
| MV_Schw | C | 5400 | 70  | 3  | 0.819327818667335    |
| MV_Schw | C | 5401 | 149 | 7  | 0.215757612560076    |
| MV_Schw | C | 5402 | 143 | 8  | 0.0340037011728573   |
| MV_Schw | C | 5403 | 514 | 34 | 4.52205867819729e-10 |
| MV_Schw | A | 5404 | 35  | 3  | 0.0735418108684054   |
| MV_Schw | C | 5405 | 62  | 3  | 0.57780206681461     |
| MV_Schw | C | 5406 | 14  | 1  | 0.944879389258477    |
| MV_Schw | C | 5407 | 29  | 1  | 1                    |
| MV_Schw | C | 5408 | 48  | 6  | 0.00123822823581129  |
| MV_Schw | T | 5409 | 6   | 1  | 0.704667204683568    |
| MV_Schw | A | 5410 | 17  | 0  | 1                    |
| MV_Schw | A | 5411 | 4   | 1  | 0.619556855087002    |
| MV_Schw | A | 5412 | 43  | 2  | 0.632968068765344    |
| MV_Schw | G | 5413 | 62  | 3  | 0.57780206681461     |
| MV_Schw | G | 5414 | 60  | 0  | 0.957721317456694    |
| MV_Schw | A | 5415 | 4   | 0  | 1                    |
| MV_Schw | G | 5416 | 62  | 5  | 0.0540493900876719   |
| MV_Schw | A | 5417 | 10  | 0  | 1                    |
| MV_Schw | C | 5418 | 83  | 5  | 0.161503851613234    |
| MV_Schw | A | 5419 | 16  | 1  | 0.483965165529824    |
| MV_Schw | C | 5420 | 89  | 5  | 0.201986157592846    |
| MV_Schw | C | 5421 | 457 | 32 | 3.28978126611001e-10 |
| MV_Schw | G | 5422 | 85  | 5  | 0.074997775457354    |
| MV_Schw | G | 5423 | 382 | 13 | 0.307480793677112    |
| MV_Schw | G | 5424 | 91  | 5  | 0.217911555108928    |
| MV_Schw | A | 5425 | 54  | 1  | 1                    |
| MV_Schw | A | 5426 | 10  | 0  | 1                    |
| MV_Schw | T | 5427 | 10  | 0  | 1                    |
| MV_Schw | C | 5428 | 126 | 3  | 1                    |
| MV_Schw | C | 5429 | 475 | 15 | 0.406275863895757    |
| MV_Schw | C | 5430 | 207 | 5  | 1                    |
| MV_Schw | A | 5431 | 48  | 1  | 1                    |
| MV_Schw | G | 5432 | 308 | 7  | 1                    |
| MV_Schw | A | 5433 | 21  | 1  | 0.632968068765344    |
| MV_Schw | A | 5434 | 31  | 2  | 0.428411386231373    |



|         |   |      |     |   |                   |
|---------|---|------|-----|---|-------------------|
| MV_Schw | T | 5435 | 74  | 4 | 0.237817203872315 |
| MV_Schw | C | 5436 | 95  | 1 | 1                 |
| MV_Schw | A | 5437 | 43  | 1 | 1                 |
| MV_Schw | A | 5438 | 12  | 0 | 1                 |
| MV_Schw | G | 5439 | 362 | 9 | 0.983694697749173 |
| MV_Schw | A | 5440 | 25  | 2 | 0.314611398059001 |
| MV_Schw | C | 5441 | 141 | 1 | 0.542247232322076 |
| MV_Schw | T | 5442 | 2   | 0 | 1                 |
| MV_Schw | C | 5443 | 4   | 1 | 0.136107188572645 |
| MV_Schw | A | 5444 | 132 | 2 | 1                 |
| MV_Schw | T | 5445 | 10  | 0 | 1                 |
| MV_Schw | C | 5446 | 132 | 0 | 0.222002676269896 |
| MV_Schw | C | 5447 | 41  | 1 | 0.945767847051808 |
| MV_Schw | A | 5448 | 16  | 0 | 1                 |
| MV_Schw | A | 5449 | 2   | 0 | 1                 |
| MV_Schw | T | 5450 | 43  | 1 | 1                 |
| MV_Schw | G | 5451 | 66  | 0 | 0.789229943133706 |
| MV_Schw | T | 5452 | 4   | 0 | 1                 |
| MV_Schw | C | 5453 | 21  | 1 | 1                 |
| MV_Schw | C | 5454 | 45  | 1 | 1                 |
| MV_Schw | A | 5455 | 128 | 0 | 0.307480793677112 |
| MV_Schw | T | 5456 | 12  | 0 | 1                 |
| MV_Schw | C | 5457 | 41  | 0 | 1                 |
| MV_Schw | A | 5458 | 21  | 0 | 1                 |
| MV_Schw | T | 5459 | 140 | 4 | 1                 |
| MV_Schw | G | 5460 | 25  | 1 | 1                 |
| MV_Schw | G | 5461 | 31  | 1 | 0.791667533131283 |
| MV_Schw | G | 5462 | 35  | 1 | 0.863499923807603 |
| MV_Schw | T | 5463 | 4   | 0 | 1                 |
| MV_Schw | C | 5464 | 141 | 2 | 1                 |
| MV_Schw | T | 5465 | 10  | 1 | 0.307480793677112 |
| MV_Schw | C | 5466 | 39  | 3 | 0.273798916014578 |
| MV_Schw | A | 5467 | 16  | 1 | 0.483965165529824 |
| MV_Schw | A | 5468 | 68  | 1 | 1                 |
| MV_Schw | G | 5469 | 85  | 1 | 1                 |
| MV_Schw | G | 5470 | 76  | 1 | 1                 |

|         |   |      |     |   |                   |   |
|---------|---|------|-----|---|-------------------|---|
| MV_Schw | T | 5471 | 39  | 1 | 0.9314909603024   |   |
| MV_Schw | G | 5472 | 56  | 1 |                   | 1 |
| MV_Schw | A | 5473 | 23  | 0 |                   | 1 |
| MV_Schw | A | 5474 | 29  | 1 | 0.789229943133706 |   |
| MV_Schw | C | 5475 | 58  | 3 | 0.281632101641278 |   |
| MV_Schw | G | 5476 | 78  | 2 |                   | 1 |
| MV_Schw | T | 5477 | 2   | 0 |                   | 1 |
| MV_Schw | C | 5478 | 78  | 1 |                   | 1 |
| MV_Schw | T | 5479 | 8   | 0 |                   | 1 |
| MV_Schw | C | 5480 | 155 | 1 | 0.436311974989592 |   |
| MV_Schw | T | 5481 | 4   | 0 |                   | 1 |
| MV_Schw | G | 5482 | 182 | 4 |                   | 1 |
| MV_Schw | C | 5483 | 19  | 0 |                   | 1 |
| MV_Schw | C | 5484 | 29  | 0 |                   | 1 |
| MV_Schw | A | 5485 | 23  | 0 |                   | 1 |
| MV_Schw | T | 5486 | 27  | 1 |                   | 1 |
| MV_Schw | A | 5487 | 12  | 0 |                   | 1 |
| MV_Schw | T | 5488 | 0   | 0 |                   | 1 |
| MV_Schw | T | 5489 | 6   | 0 |                   | 1 |
| MV_Schw | C | 5490 | 21  | 0 |                   | 1 |
| MV_Schw | A | 5491 | 31  | 1 |                   | 1 |
| MV_Schw | T | 5492 | 41  | 2 | 0.599534349993353 |   |
| MV_Schw | G | 5493 | 151 | 3 |                   | 1 |
| MV_Schw | G | 5494 | 21  | 0 |                   | 1 |
| MV_Schw | C | 5495 | 85  | 1 |                   | 1 |
| MV_Schw | A | 5496 | 6   | 0 |                   | 1 |
| MV_Schw | G | 5497 | 138 | 3 |                   | 1 |
| MV_Schw | T | 5498 | 21  | 0 |                   | 1 |
| MV_Schw | A | 5499 | 6   | 0 |                   | 1 |
| MV_Schw | C | 5500 | 64  | 1 |                   | 1 |
| MV_Schw | T | 5501 | 35  | 1 |                   | 1 |
| MV_Schw | G | 5502 | 192 | 4 |                   | 1 |
| MV_Schw | T | 5503 | 17  | 1 | 0.983041048229953 |   |
| MV_Schw | T | 5504 | 145 | 2 |                   | 1 |
| MV_Schw | A | 5505 | 70  | 0 | 0.789229943133706 |   |
| MV_Schw | A | 5506 | 8   | 0 |                   | 1 |

|         |   |      |     |    |                    |   |
|---------|---|------|-----|----|--------------------|---|
| MV_Schw | C | 5507 | 304 | 6  |                    | 1 |
| MV_Schw | T | 5508 | 54  | 3  | 0.480219983992261  |   |
| MV_Schw | C | 5509 | 112 | 2  |                    | 1 |
| MV_Schw | T | 5510 | 83  | 1  |                    | 1 |
| MV_Schw | C | 5511 | 89  | 2  |                    | 1 |
| MV_Schw | C | 5512 | 417 | 9  |                    | 1 |
| MV_Schw | A | 5513 | 207 | 7  | 0.482213389565027  |   |
| MV_Schw | A | 5514 | 60  | 2  | 0.983041048229953  |   |
| MV_Schw | A | 5515 | 27  | 1  |                    | 1 |
| MV_Schw | C | 5516 | 209 | 11 | 0.0088862711289435 |   |
| MV_Schw | A | 5517 | 33  | 1  |                    | 1 |
| MV_Schw | C | 5518 | 21  | 1  |                    | 1 |
| MV_Schw | C | 5519 | 76  | 1  |                    | 1 |
| MV_Schw | C | 5520 | 64  | 1  |                    | 1 |
| MV_Schw | A | 5521 | 25  | 1  |                    | 1 |
| MV_Schw | C | 5522 | 43  | 3  | 0.12801336938299   |   |
| MV_Schw | C | 5523 | 60  | 3  | 0.550155392537109  |   |
| MV_Schw | G | 5524 | 27  | 3  | 0.128277619623459  |   |
| MV_Schw | G | 5525 | 391 | 7  |                    | 1 |
| MV_Schw | T | 5526 | 0   | 0  |                    | 1 |
| MV_Schw | C | 5527 | 134 | 4  | 0.8790631473823    |   |
| MV_Schw | A | 5528 | 116 | 5  | 0.308443216377307  |   |
| MV_Schw | A | 5529 | 47  | 2  | 0.678058690427187  |   |
| MV_Schw | A | 5530 | 58  | 4  | 0.118907467124559  |   |
| MV_Schw | T | 5531 | 122 | 3  | 0.983041048229953  |   |
| MV_Schw | C | 5532 | 27  | 1  |                    | 1 |
| MV_Schw | C | 5533 | 50  | 1  |                    | 1 |
| MV_Schw | A | 5534 | 50  | 1  |                    | 1 |
| MV_Schw | T | 5535 | 105 | 6  | 0.0773768769787529 |   |
| MV_Schw | T | 5536 | 41  | 2  | 0.599534349993353  |   |
| MV_Schw | G | 5537 | 16  | 2  | 0.157362228007976  |   |
| MV_Schw | G | 5538 | 205 | 3  |                    | 1 |
| MV_Schw | G | 5539 | 99  | 1  | 0.944879389258477  |   |
| MV_Schw | G | 5540 | 192 | 6  | 0.713780715109928  |   |
| MV_Schw | C | 5541 | 47  | 1  |                    | 1 |
| MV_Schw | A | 5542 | 39  | 1  | 0.9314909603024    |   |

|         |   |      |     |    |                      |   |
|---------|---|------|-----|----|----------------------|---|
| MV_Schw | A | 5543 | 27  | 1  |                      | 1 |
| MV_Schw | T | 5544 | 23  | 1  |                      | 1 |
| MV_Schw | C | 5545 | 76  | 3  | 0.467924584055268    |   |
| MV_Schw | T | 5546 | 4   | 0  |                      | 1 |
| MV_Schw | C | 5547 | 89  | 1  |                      | 1 |
| MV_Schw | T | 5548 | 17  | 0  |                      | 1 |
| MV_Schw | C | 5549 | 234 | 5  |                      | 1 |
| MV_Schw | T | 5550 | 12  | 1  | 0.88950624150852     |   |
| MV_Schw | A | 5551 | 16  | 0  |                      | 1 |
| MV_Schw | A | 5552 | 4   | 0  |                      | 1 |
| MV_Schw | G | 5553 | 89  | 6  | 0.0358765704418588   |   |
| MV_Schw | A | 5554 | 6   | 1  | 0.704667204683568    |   |
| MV_Schw | T | 5555 | 21  | 0  |                      | 1 |
| MV_Schw | A | 5556 | 8   | 0  |                      | 1 |
| MV_Schw | G | 5557 | 29  | 1  |                      | 1 |
| MV_Schw | G | 5558 | 21  | 0  |                      | 1 |
| MV_Schw | G | 5559 | 16  | 0  |                      | 1 |
| MV_Schw | G | 5560 | 47  | 1  |                      | 1 |
| MV_Schw | T | 5561 | 2   | 0  |                      | 1 |
| MV_Schw | G | 5562 | 12  | 2  | 0.0975104748468945   |   |
| MV_Schw | G | 5563 | 47  | 1  |                      | 1 |
| MV_Schw | T | 5564 | 85  | 2  |                      | 1 |
| MV_Schw | A | 5565 | 25  | 1  |                      | 1 |
| MV_Schw | G | 5566 | 99  | 5  | 0.136107188572645    |   |
| MV_Schw | G | 5567 | 60  | 1  |                      | 1 |
| MV_Schw | A | 5568 | 31  | 0  |                      | 1 |
| MV_Schw | A | 5569 | 33  | 3  | 0.197209929577240    |   |
| MV_Schw | T | 5570 | 37  | 3  | 0.245202640825390    |   |
| MV_Schw | A | 5571 | 68  | 5  | 0.0767999036069378   |   |
| MV_Schw | G | 5572 | 419 | 29 | 2.07082306158832e-09 |   |
| MV_Schw | G | 5573 | 97  | 4  | 0.550155392537109    |   |
| MV_Schw | A | 5574 | 19  | 1  |                      | 1 |
| MV_Schw | A | 5575 | 21  | 0  |                      | 1 |
| MV_Schw | G | 5576 | 343 | 28 | 9.27002844493634e-11 |   |
| MV_Schw | T | 5577 | 12  | 1  | 0.88950624150852     |   |
| MV_Schw | G | 5578 | 638 | 43 | 1.04984016277249e-12 |   |

|         |   |      |     |    |                    |
|---------|---|------|-----|----|--------------------|
| MV_Schw | C | 5579 | 260 | 10 | 0.211230433289291  |
| MV_Schw | A | 5580 | 140 | 4  | 1                  |
| MV_Schw | A | 5581 | 17  | 0  | 1                  |
| MV_Schw | G | 5582 | 107 | 3  | 1                  |
| MV_Schw | C | 5583 | 134 | 8  | 0.0221448235477836 |
| MV_Schw | T | 5584 | 47  | 1  | 1                  |
| MV_Schw | A | 5585 | 6   | 1  | 0.704667204683568  |
| MV_Schw | C | 5586 | 184 | 7  | 0.307432508150825  |
| MV_Schw | A | 5587 | 52  | 1  | 1                  |
| MV_Schw | A | 5588 | 10  | 0  | 1                  |
| MV_Schw | A | 5589 | 29  | 1  | 1                  |
| MV_Schw | G | 5590 | 122 | 3  | 0.983041048229953  |
| MV_Schw | T | 5591 | 6   | 0  | 1                  |
| MV_Schw | T | 5592 | 39  | 1  | 1                  |
| MV_Schw | A | 5593 | 85  | 0  | 0.648224297390367  |
| MV_Schw | T | 5594 | 48  | 1  | 1                  |
| MV_Schw | G | 5595 | 45  | 1  | 1                  |
| MV_Schw | A | 5596 | 31  | 0  | 1                  |
| MV_Schw | C | 5597 | 172 | 3  | 1                  |
| MV_Schw | T | 5598 | 16  | 0  | 1                  |
| MV_Schw | C | 5599 | 8   | 0  | 1                  |
| MV_Schw | G | 5600 | 99  | 2  | 1                  |
| MV_Schw | T | 5601 | 50  | 1  | 1                  |
| MV_Schw | T | 5602 | 58  | 0  | 0.953489044526869  |
| MV_Schw | C | 5603 | 89  | 2  | 1                  |
| MV_Schw | C | 5604 | 103 | 3  | 1                  |
| MV_Schw | A | 5605 | 23  | 0  | 1                  |
| MV_Schw | G | 5606 | 114 | 1  | 0.789229943133706  |
| MV_Schw | C | 5607 | 79  | 1  | 1                  |
| MV_Schw | C | 5608 | 16  | 0  | 1                  |
| MV_Schw | A | 5609 | 14  | 0  | 1                  |
| MV_Schw | T | 5610 | 4   | 0  | 1                  |
| MV_Schw | C | 5611 | 62  | 0  | 0.789229943133706  |
| MV_Schw | A | 5612 | 16  | 0  | 1                  |
| MV_Schw | A | 5613 | 14  | 1  | 0.944879389258477  |
| MV_Schw | T | 5614 | 12  | 0  | 1                  |

|         |   |      |     |   |                   |   |
|---------|---|------|-----|---|-------------------|---|
| MV_Schw | C | 5615 | 48  | 0 | 0.950262622850522 |   |
| MV_Schw | A | 5616 | 29  | 1 |                   | 1 |
| MV_Schw | T | 5617 | 17  | 0 |                   | 1 |
| MV_Schw | T | 5618 | 19  | 0 |                   | 1 |
| MV_Schw | A | 5619 | 47  | 1 |                   | 1 |
| MV_Schw | G | 5620 | 16  | 0 |                   | 1 |
| MV_Schw | T | 5621 | 0   | 0 |                   | 1 |
| MV_Schw | C | 5622 | 37  | 1 |                   | 1 |
| MV_Schw | A | 5623 | 54  | 1 |                   | 1 |
| MV_Schw | T | 5624 | 17  | 0 |                   | 1 |
| MV_Schw | A | 5625 | 50  | 0 | 0.950262622850522 |   |
| MV_Schw | A | 5626 | 25  | 0 |                   | 1 |
| MV_Schw | A | 5627 | 101 | 3 | 0.789229943133706 |   |
| MV_Schw | A | 5628 | 12  | 0 |                   | 1 |
| MV_Schw | T | 5629 | 110 | 3 |                   | 1 |
| MV_Schw | T | 5630 | 33  | 0 |                   | 1 |
| MV_Schw | A | 5631 | 10  | 1 | 0.822598489333375 |   |
| MV_Schw | A | 5632 | 10  | 0 |                   | 1 |
| MV_Schw | T | 5633 | 16  | 0 |                   | 1 |
| MV_Schw | G | 5634 | 178 | 3 |                   | 1 |
| MV_Schw | C | 5635 | 23  | 1 |                   | 1 |
| MV_Schw | C | 5636 | 25  | 0 |                   | 1 |
| MV_Schw | C | 5637 | 27  | 1 |                   | 1 |
| MV_Schw | A | 5638 | 143 | 3 |                   | 1 |
| MV_Schw | A | 5639 | 43  | 0 |                   | 1 |
| MV_Schw | T | 5640 | 109 | 1 | 0.947544583923452 |   |
| MV_Schw | A | 5641 | 6   | 0 |                   | 1 |
| MV_Schw | T | 5642 | 23  | 1 | 0.658415249679101 |   |
| MV_Schw | A | 5643 | 0   | 0 |                   | 1 |
| MV_Schw | A | 5644 | 8   | 0 |                   | 1 |
| MV_Schw | C | 5645 | 287 | 7 |                   | 1 |
| MV_Schw | T | 5646 | 4   | 0 |                   | 1 |
| MV_Schw | C | 5647 | 87  | 2 |                   | 1 |
| MV_Schw | T | 5648 | 0   | 0 |                   | 1 |
| MV_Schw | C | 5649 | 17  | 1 | 0.983041048229953 |   |
| MV_Schw | C | 5650 | 58  | 1 |                   | 1 |

|         |   |      |     |    |                      |   |
|---------|---|------|-----|----|----------------------|---|
| MV_Schw | T | 5651 | 16  | 0  |                      | 1 |
| MV_Schw | C | 5652 | 66  | 1  |                      | 1 |
| MV_Schw | A | 5653 | 25  | 1  |                      | 1 |
| MV_Schw | A | 5654 | 4   | 0  |                      | 1 |
| MV_Schw | T | 5655 | 48  | 0  | 0.950262622850522    |   |
| MV_Schw | A | 5656 | 8   | 0  |                      | 1 |
| MV_Schw | A | 5657 | 4   | 0  |                      | 1 |
| MV_Schw | C | 5658 | 54  | 1  |                      | 1 |
| MV_Schw | T | 5659 | 16  | 1  | 0.950262622850522    |   |
| MV_Schw | G | 5660 | 203 | 9  | 0.176665674313972    |   |
| MV_Schw | C | 5661 | 93  | 1  |                      | 1 |
| MV_Schw | A | 5662 | 68  | 5  | 0.0767999036069378   |   |
| MV_Schw | C | 5663 | 727 | 25 | 0.0375736381440234   |   |
| MV_Schw | G | 5664 | 17  | 3  | 0.0469760201915419   |   |
| MV_Schw | A | 5665 | 8   | 0  |                      | 1 |
| MV_Schw | G | 5666 | 56  | 4  | 0.106459164393546    |   |
| MV_Schw | G | 5667 | 41  | 3  | 0.297586725038221    |   |
| MV_Schw | G | 5668 | 45  | 5  | 0.0140368018204807   |   |
| MV_Schw | T | 5669 | 60  | 1  |                      | 1 |
| MV_Schw | A | 5670 | 14  | 1  | 0.426789350155389    |   |
| MV_Schw | G | 5671 | 66  | 5  | 0.0239036682558459   |   |
| MV_Schw | A | 5672 | 29  | 4  | 0.0103781019227812   |   |
| MV_Schw | G | 5673 | 64  | 7  | 0.000394673874468293 |   |
| MV_Schw | A | 5674 | 33  | 1  |                      | 1 |
| MV_Schw | T | 5675 | 29  | 1  |                      | 1 |
| MV_Schw | T | 5676 | 45  | 0  |                      | 1 |
| MV_Schw | G | 5677 | 672 | 17 | 0.944879389258477    |   |
| MV_Schw | C | 5678 | 149 | 9  | 0.00751263592807874  |   |
| MV_Schw | A | 5679 | 45  | 4  | 0.0485139564708208   |   |
| MV_Schw | G | 5680 | 198 | 20 | 1.23794099047534e-09 |   |
| MV_Schw | A | 5681 | 12  | 1  | 0.88950624150852     |   |
| MV_Schw | A | 5682 | 25  | 1  |                      | 1 |
| MV_Schw | T | 5683 | 33  | 2  | 0.463720798159947    |   |
| MV_Schw | A | 5684 | 2   | 1  | 0.491835918445353    |   |
| MV_Schw | C | 5685 | 264 | 14 | 0.00441188852262541  |   |
| MV_Schw | A | 5686 | 12  | 1  | 0.88950624150852     |   |

|         |    |      |     |    |                     |
|---------|----|------|-----|----|---------------------|
| MV_Schw | G  | 5687 | 200 | 7  | 0.595588876895851   |
| MV_Schw | G  | 5688 | 93  | 7  | 0.00551710625234576 |
| MV_Schw | A  | 5689 | 39  | 2  | 0.560243889454362   |
| MV_Schw | G  | 5690 | 114 | 9  | 0.002551082569142   |
| MV_Schw | NA | 5691 | 0   | 0  | NA                  |
| MV_Schw | C  | 5692 | 41  | 0  | 1                   |
| MV_Schw | T  | 5693 | 14  | 1  | 0.944879389258477   |
| MV_Schw | A  | 5694 | 25  | 1  | 1                   |
| MV_Schw | C  | 5695 | 440 | 13 | 0.456705758236653   |
| MV_Schw | T  | 5696 | 87  | 1  | 1                   |
| MV_Schw | G  | 5697 | 122 | 3  | 0.983041048229953   |
| MV_Schw | A  | 5698 | 10  | 0  | 1                   |
| MV_Schw | G  | 5699 | 215 | 7  | 0.499662168427985   |
| MV_Schw | A  | 5700 | 66  | 3  | 0.354972433257953   |
| MV_Schw | A  | 5701 | 17  | 1  | 0.528591092326266   |
| MV_Schw | C  | 5702 | 207 | 5  | 1                   |
| MV_Schw | A  | 5703 | 8   | 1  | 0.789229943133706   |
| MV_Schw | G  | 5704 | 198 | 8  | 0.245767024627649   |
| MV_Schw | T  | 5705 | 21  | 0  | 1                   |
| MV_Schw | T  | 5706 | 141 | 5  | 0.742170203109886   |
| MV_Schw | T  | 5707 | 47  | 1  | 1                   |
| MV_Schw | T  | 5708 | 25  | 0  | 1                   |
| MV_Schw | G  | 5709 | 184 | 4  | 1                   |
| MV_Schw | G  | 5710 | 48  | 1  | 1                   |
| MV_Schw | A  | 5711 | 23  | 1  | 0.658415249679101   |
| MV_Schw | A  | 5712 | 25  | 0  | 1                   |
| MV_Schw | C  | 5713 | 10  | 0  | 1                   |
| MV_Schw | C  | 5714 | 14  | 0  | 1                   |
| MV_Schw | A  | 5715 | 16  | 0  | 1                   |
| MV_Schw | A  | 5716 | 48  | 1  | 1                   |
| MV_Schw | T  | 5717 | 47  | 1  | 1                   |
| MV_Schw | T  | 5718 | 114 | 1  | 1                   |
| MV_Schw | A  | 5719 | 12  | 0  | 1                   |
| MV_Schw | G  | 5720 | 35  | 1  | 0.863499923807603   |
| MV_Schw | A  | 5721 | 12  | 0  | 1                   |
| MV_Schw | G  | 5722 | 188 | 5  | 1                   |



|         |   |      |     |    |                    |   |
|---------|---|------|-----|----|--------------------|---|
| MV_Schw | A | 5723 | 17  | 0  |                    | 1 |
| MV_Schw | T | 5724 | 50  | 0  | 0.950262622850522  |   |
| MV_Schw | G | 5725 | 50  | 1  |                    | 1 |
| MV_Schw | C | 5726 | 19  | 0  |                    | 1 |
| MV_Schw | A | 5727 | 209 | 1  | 0.444605338381727  |   |
| MV_Schw | C | 5728 | 122 | 5  | 0.508699586088801  |   |
| MV_Schw | T | 5729 | 52  | 1  |                    | 1 |
| MV_Schw | T | 5730 | 10  | 0  |                    | 1 |
| MV_Schw | A | 5731 | 45  | 1  |                    | 1 |
| MV_Schw | A | 5732 | 41  | 2  | 0.599534349993353  |   |
| MV_Schw | T | 5733 | 70  | 1  |                    | 1 |
| MV_Schw | G | 5734 | 81  | 1  |                    | 1 |
| MV_Schw | C | 5735 | 285 | 1  | 0.0364439659893172 |   |
| MV_Schw | A | 5736 | 25  | 0  |                    | 1 |
| MV_Schw | A | 5737 | 56  | 0  | 0.950262622850522  |   |
| MV_Schw | T | 5738 | 91  | 1  |                    | 1 |
| MV_Schw | G | 5739 | 10  | 0  |                    | 1 |
| MV_Schw | A | 5740 | 4   | 0  |                    | 1 |
| MV_Schw | C | 5741 | 52  | 2  | 0.78354985902497   |   |
| MV_Schw | C | 5742 | 372 | 5  | 0.737900226779511  |   |
| MV_Schw | C | 5743 | 97  | 1  | 0.944879389258477  |   |
| MV_Schw | A | 5744 | 72  | 3  | 0.42458526175556   |   |
| MV_Schw | G | 5745 | 236 | 5  |                    | 1 |
| MV_Schw | A | 5746 | 21  | 0  |                    | 1 |
| MV_Schw | A | 5747 | 45  | 2  | 0.65158773158174   |   |
| MV_Schw | T | 5748 | 37  | 1  | 0.88950624150852   |   |
| MV_Schw | A | 5749 | 31  | 0  |                    | 1 |
| MV_Schw | T | 5750 | 8   | 0  |                    | 1 |
| MV_Schw | A | 5751 | 52  | 2  | 0.78354985902497   |   |
| MV_Schw | A | 5752 | 21  | 1  |                    | 1 |
| MV_Schw | G | 5753 | 297 | 5  |                    | 1 |
| MV_Schw | A | 5754 | 39  | 1  | 0.9314909603024    |   |
| MV_Schw | C | 5755 | 628 | 17 | 0.789229943133706  |   |
| MV_Schw | C | 5756 | 29  | 0  |                    | 1 |
| MV_Schw | G | 5757 | 58  | 3  | 0.528591092326266  |   |
| MV_Schw | G | 5758 | 184 | 8  | 0.151070769951824  |   |

|         |   |      |     |    |                    |
|---------|---|------|-----|----|--------------------|
| MV_Schw | T | 5759 | 97  | 6  | 0.053691133210959  |
| MV_Schw | T | 5760 | 145 | 4  | 1                  |
| MV_Schw | C | 5761 | 48  | 1  | 1                  |
| MV_Schw | A | 5762 | 21  | 1  | 0.632968068765344  |
| MV_Schw | G | 5763 | 50  | 0  | 0.950262622850522  |
| MV_Schw | A | 5764 | 54  | 1  | 1                  |
| MV_Schw | G | 5765 | 79  | 1  | 1                  |
| MV_Schw | T | 5766 | 225 | 7  | 0.789229943133706  |
| MV_Schw | G | 5767 | 215 | 8  | 0.378350778944693  |
| MV_Schw | T | 5768 | 6   | 0  | 1                  |
| MV_Schw | A | 5769 | 10  | 1  | 0.307480793677112  |
| MV_Schw | G | 5770 | 134 | 7  | 0.111492774142499  |
| MV_Schw | C | 5771 | 172 | 5  | 0.789229943133706  |
| MV_Schw | T | 5772 | 48  | 2  | 0.709032941865358  |
| MV_Schw | T | 5773 | 10  | 1  | 0.822598489333375  |
| MV_Schw | C | 5774 | 85  | 1  | 1                  |
| MV_Schw | A | 5775 | 58  | 3  | 0.528591092326266  |
| MV_Schw | A | 5776 | 23  | 1  | 1                  |
| MV_Schw | G | 5777 | 316 | 13 | 0.0521570591704954 |
| MV_Schw | T | 5778 | 19  | 1  | 0.57780206681461   |
| MV_Schw | A | 5779 | 25  | 1  | 0.704667204683568  |
| MV_Schw | G | 5780 | 52  | 1  | 1                  |
| MV_Schw | G | 5781 | 180 | 3  | 1                  |
| MV_Schw | A | 5782 | 41  | 2  | 0.599534349993353  |
| MV_Schw | G | 5783 | 97  | 4  | 0.550155392537109  |
| MV_Schw | A | 5784 | 17  | 0  | 1                  |
| MV_Schw | C | 5785 | 33  | 3  | 0.197209929577240  |
| MV_Schw | A | 5786 | 12  | 0  | 1                  |
| MV_Schw | C | 5787 | 62  | 3  | 0.57780206681461   |
| MV_Schw | A | 5788 | 147 | 5  | 0.77901773725233   |
| MV_Schw | A | 5789 | 23  | 0  | 1                  |
| MV_Schw | G | 5790 | 223 | 6  | 0.981946864240757  |
| MV_Schw | A | 5791 | 2   | 0  | 1                  |
| MV_Schw | G | 5792 | 107 | 3  | 0.950262622850522  |
| MV_Schw | A | 5793 | 89  | 2  | 1                  |
| MV_Schw | T | 5794 | 45  | 0  | 1                  |

|         |   |      |     |    |                      |   |
|---------|---|------|-----|----|----------------------|---|
| MV_Schw | T | 5795 | 27  | 1  |                      | 1 |
| MV_Schw | T | 5796 | 151 | 7  | 0.222002676269896    |   |
| MV_Schw | G | 5797 | 353 | 12 | 0.285257240518862    |   |
| MV_Schw | C | 5798 | 345 | 18 | 0.000732549083108954 |   |
| MV_Schw | G | 5799 | 723 | 25 | 0.0502201555170974   |   |
| MV_Schw | G | 5800 | 110 | 3  | 0.950262622850522    |   |
| MV_Schw | G | 5801 | 147 | 6  | 0.314611398059001    |   |
| MV_Schw | A | 5802 | 19  | 1  |                      | 1 |
| MV_Schw | G | 5803 | 122 | 5  | 0.337352366102426    |   |
| MV_Schw | T | 5804 | 12  | 0  |                      | 1 |
| MV_Schw | A | 5805 | 25  | 0  |                      | 1 |
| MV_Schw | G | 5806 | 372 | 13 | 0.297936084972       |   |
| MV_Schw | T | 5807 | 10  | 0  |                      | 1 |
| MV_Schw | C | 5808 | 101 | 3  | 0.789229943133706    |   |
| MV_Schw | C | 5809 | 657 | 21 | 0.215824715214299    |   |
| MV_Schw | T | 5810 | 95  | 3  | 0.764161655608143    |   |
| MV_Schw | G | 5811 | 386 | 12 | 0.477087111156645    |   |
| MV_Schw | G | 5812 | 308 | 6  |                      | 1 |
| MV_Schw | C | 5813 | 359 | 9  |                      | 1 |
| MV_Schw | A | 5814 | 43  | 2  | 0.632968068765344    |   |
| MV_Schw | G | 5815 | 21  | 1  |                      | 1 |
| MV_Schw | G | 5816 | 207 | 2  | 0.734151152837751    |   |
| MV_Schw | T | 5817 | 180 | 7  | 0.298485329352986    |   |
| MV_Schw | G | 5818 | 126 | 5  | 0.536502598785117    |   |
| MV_Schw | C | 5819 | 295 | 5  |                      | 1 |
| MV_Schw | G | 5820 | 238 | 5  |                      | 1 |
| MV_Schw | G | 5821 | 79  | 1  |                      | 1 |
| MV_Schw | C | 5822 | 351 | 8  |                      | 1 |
| MV_Schw | C | 5823 | 52  | 1  |                      | 1 |
| MV_Schw | C | 5824 | 91  | 1  |                      | 1 |
| MV_Schw | T | 5825 | 29  | 1  |                      | 1 |
| MV_Schw | A | 5826 | 68  | 1  |                      | 1 |
| MV_Schw | G | 5827 | 97  | 2  |                      | 1 |
| MV_Schw | G | 5828 | 89  | 1  |                      | 1 |
| MV_Schw | C | 5829 | 157 | 4  |                      | 1 |
| MV_Schw | G | 5830 | 120 | 3  | 0.97940134364504     |   |

|         |   |      |     |   |                   |   |
|---------|---|------|-----|---|-------------------|---|
| MV_Schw | T | 5831 | 2   | 0 |                   | 1 |
| MV_Schw | T | 5832 | 35  | 1 | 0.863499923807603 |   |
| MV_Schw | G | 5833 | 140 | 2 |                   | 1 |
| MV_Schw | C | 5834 | 116 | 0 | 0.296710762771661 |   |
| MV_Schw | C | 5835 | 114 | 5 | 0.463720798159947 |   |
| MV_Schw | A | 5836 | 19  | 1 |                   | 1 |
| MV_Schw | C | 5837 | 97  | 3 |                   | 1 |
| MV_Schw | A | 5838 | 16  | 1 | 0.483965165529824 |   |
| MV_Schw | G | 5839 | 33  | 1 |                   | 1 |
| MV_Schw | C | 5840 | 64  | 0 | 0.789229943133706 |   |
| MV_Schw | T | 5841 | 27  | 2 | 0.355295708921217 |   |
| MV_Schw | G | 5842 | 39  | 0 |                   | 1 |
| MV_Schw | C | 5843 | 140 | 5 | 0.7318017534422   |   |
| MV_Schw | T | 5844 | 37  | 1 |                   | 1 |
| MV_Schw | C | 5845 | 68  | 1 |                   | 1 |
| MV_Schw | A | 5846 | 50  | 0 | 0.950262622850522 |   |
| MV_Schw | G | 5847 | 70  | 0 | 0.789229943133706 |   |
| MV_Schw | A | 5848 | 10  | 0 |                   | 1 |
| MV_Schw | T | 5849 | 76  | 1 |                   | 1 |
| MV_Schw | A | 5850 | 21  | 1 |                   | 1 |
| MV_Schw | A | 5851 | 2   | 1 | 0.491835918445353 |   |
| MV_Schw | C | 5852 | 35  | 1 |                   | 1 |
| MV_Schw | A | 5853 | 47  | 1 |                   | 1 |
| MV_Schw | G | 5854 | 130 | 1 | 0.983041048229953 |   |
| MV_Schw | C | 5855 | 231 | 6 | 0.987114400552037 |   |
| MV_Schw | C | 5856 | 271 | 6 |                   | 1 |
| MV_Schw | G | 5857 | 116 | 3 |                   | 1 |
| MV_Schw | G | 5858 | 136 | 5 | 0.707150586447893 |   |
| MV_Schw | C | 5859 | 349 | 7 |                   | 1 |
| MV_Schw | A | 5860 | 39  | 1 |                   | 1 |
| MV_Schw | T | 5861 | 87  | 1 |                   | 1 |
| MV_Schw | T | 5862 | 43  | 0 |                   | 1 |
| MV_Schw | G | 5863 | 31  | 1 | 0.791667533131283 |   |
| MV_Schw | C | 5864 | 229 | 2 | 0.632968068765344 |   |
| MV_Schw | A | 5865 | 6   | 0 |                   | 1 |
| MV_Schw | C | 5866 | 419 | 9 |                   | 1 |

|         |   |      |     |    |                     |   |
|---------|---|------|-----|----|---------------------|---|
| MV_Schw | T | 5867 | 29  | 1  |                     | 1 |
| MV_Schw | T | 5868 | 23  | 0  |                     | 1 |
| MV_Schw | C | 5869 | 242 | 2  | 0.528372703117072   |   |
| MV_Schw | A | 5870 | 8   | 0  |                     | 1 |
| MV_Schw | C | 5871 | 589 | 9  | 0.950262622850522   |   |
| MV_Schw | C | 5872 | 29  | 0  |                     | 1 |
| MV_Schw | A | 5873 | 48  | 1  |                     | 1 |
| MV_Schw | G | 5874 | 78  | 2  |                     | 1 |
| MV_Schw | T | 5875 | 14  | 1  | 0.944879389258477   |   |
| MV_Schw | C | 5876 | 27  | 0  |                     | 1 |
| MV_Schw | C | 5877 | 126 | 1  |                     | 1 |
| MV_Schw | A | 5878 | 12  | 0  |                     | 1 |
| MV_Schw | T | 5879 | 39  | 1  |                     | 1 |
| MV_Schw | G | 5880 | 126 | 3  |                     | 1 |
| MV_Schw | C | 5881 | 105 | 1  | 0.944944073306986   |   |
| MV_Schw | T | 5882 | 31  | 1  |                     | 1 |
| MV_Schw | G | 5883 | 31  | 0  |                     | 1 |
| MV_Schw | A | 5884 | 87  | 1  |                     | 1 |
| MV_Schw | A | 5885 | 39  | 2  | 0.560243889454362   |   |
| MV_Schw | C | 5886 | 188 | 1  | 0.280292653941906   |   |
| MV_Schw | T | 5887 | 41  | 1  | 0.945767847051808   |   |
| MV_Schw | C | 5888 | 56  | 1  |                     | 1 |
| MV_Schw | T | 5889 | 19  | 1  | 0.57780206681461    |   |
| MV_Schw | C | 5890 | 213 | 5  |                     | 1 |
| MV_Schw | A | 5891 | 446 | 7  |                     | 1 |
| MV_Schw | A | 5892 | 128 | 3  |                     | 1 |
| MV_Schw | G | 5893 | 244 | 11 | 0.0345805569340756  |   |
| MV_Schw | C | 5894 | 37  | 3  | 0.245202640825390   |   |
| MV_Schw | C | 5895 | 35  | 0  |                     | 1 |
| MV_Schw | A | 5896 | 29  | 1  |                     | 1 |
| MV_Schw | T | 5897 | 14  | 1  | 0.944879389258477   |   |
| MV_Schw | C | 5898 | 484 | 9  |                     | 1 |
| MV_Schw | G | 5899 | 74  | 5  | 0.039710340356837   |   |
| MV_Schw | A | 5900 | 23  | 1  |                     | 1 |
| MV_Schw | C | 5901 | 182 | 16 | 8.3887785807198e-07 |   |
| MV_Schw | A | 5902 | 66  | 7  | 0.00197580991987479 |   |

|         |   |      |     |    |                      |
|---------|---|------|-----|----|----------------------|
| MV_Schw | A | 5903 | 31  | 3  | 0.172254498719137    |
| MV_Schw | T | 5904 | 14  | 0  | 1                    |
| MV_Schw | C | 5905 | 109 | 3  | 1                    |
| MV_Schw | T | 5906 | 17  | 1  | 0.983041048229953    |
| MV_Schw | G | 5907 | 21  | 1  | 1                    |
| MV_Schw | A | 5908 | 35  | 2  | 0.497615650989996    |
| MV_Schw | G | 5909 | 438 | 23 | 4.34286438503701e-05 |
| MV_Schw | A | 5910 | 14  | 0  | 1                    |
| MV_Schw | G | 5911 | 60  | 5  | 0.0155102898705156   |
| MV_Schw | C | 5912 | 112 | 1  | 0.789229943133706    |
| MV_Schw | G | 5913 | 70  | 2  | 1                    |
| MV_Schw | A | 5914 | 52  | 6  | 0.00193894007320716  |
| MV_Schw | G | 5915 | 248 | 9  | 0.266590291066413    |
| MV_Schw | C | 5916 | 74  | 2  | 1                    |
| MV_Schw | C | 5917 | 240 | 5  | 1                    |
| MV_Schw | T | 5918 | 52  | 0  | 0.950262622850522    |
| MV_Schw | G | 5919 | 110 | 3  | 0.950262622850522    |
| MV_Schw | G | 5920 | 149 | 1  | 0.88950624150852     |
| MV_Schw | A | 5921 | 52  | 3  | 0.221031331031110    |
| MV_Schw | A | 5922 | 48  | 1  | 1                    |
| MV_Schw | A | 5923 | 8   | 0  | 1                    |
| MV_Schw | C | 5924 | 91  | 2  | 1                    |
| MV_Schw | T | 5925 | 43  | 3  | 0.308038546605154    |
| MV_Schw | A | 5926 | 6   | 0  | 1                    |
| MV_Schw | C | 5927 | 302 | 8  | 0.950262622850522    |
| MV_Schw | T | 5928 | 16  | 1  | 0.950262622850522    |
| MV_Schw | A | 5929 | 21  | 0  | 1                    |
| MV_Schw | A | 5930 | 21  | 0  | 1                    |
| MV_Schw | T | 5931 | 21  | 0  | 1                    |
| MV_Schw | C | 5932 | 95  | 1  | 1                    |
| MV_Schw | A | 5933 | 95  | 3  | 0.764161655608143    |
| MV_Schw | G | 5934 | 244 | 4  | 1                    |
| MV_Schw | G | 5935 | 45  | 1  | 1                    |
| MV_Schw | C | 5936 | 45  | 0  | 1                    |
| MV_Schw | A | 5937 | 48  | 1  | 1                    |
| MV_Schw | A | 5938 | 31  | 0  | 1                    |

|         |   |      |     |    |                      |   |
|---------|---|------|-----|----|----------------------|---|
| MV_Schw | T | 5939 | 23  | 0  |                      | 1 |
| MV_Schw | T | 5940 | 37  | 0  |                      | 1 |
| MV_Schw | G | 5941 | 91  | 1  |                      | 1 |
| MV_Schw | A | 5942 | 122 | 6  | 0.151282626616198    |   |
| MV_Schw | G | 5943 | 149 | 5  | 0.892314320616093    |   |
| MV_Schw | A | 5944 | 43  | 1  | 0.950262622850522    |   |
| MV_Schw | C | 5945 | 79  | 1  |                      | 1 |
| MV_Schw | A | 5946 | 31  | 0  |                      | 1 |
| MV_Schw | A | 5947 | 39  | 0  |                      | 1 |
| MV_Schw | T | 5948 | 33  | 1  |                      | 1 |
| MV_Schw | C | 5949 | 171 | 5  | 0.789229943133706    |   |
| MV_Schw | A | 5950 | 58  | 1  |                      | 1 |
| MV_Schw | G | 5951 | 85  | 3  | 0.691829352390927    |   |
| MV_Schw | A | 5952 | 23  | 1  |                      | 1 |
| MV_Schw | C | 5953 | 242 | 7  | 0.922369311866557    |   |
| MV_Schw | A | 5954 | 21  | 0  |                      | 1 |
| MV_Schw | A | 5955 | 10  | 0  |                      | 1 |
| MV_Schw | G | 5956 | 68  | 1  |                      | 1 |
| MV_Schw | C | 5957 | 68  | 3  | 0.378469870290234    |   |
| MV_Schw | A | 5958 | 19  | 1  |                      | 1 |
| MV_Schw | G | 5959 | 31  | 2  | 0.428411386231373    |   |
| MV_Schw | G | 5960 | 56  | 2  | 0.968890372475178    |   |
| MV_Schw | G | 5961 | 50  | 1  |                      | 1 |
| MV_Schw | C | 5962 | 236 | 5  |                      | 1 |
| MV_Schw | A | 5963 | 43  | 4  | 0.041842975175859    |   |
| MV_Schw | G | 5964 | 130 | 4  | 0.854189367256496    |   |
| MV_Schw | G | 5965 | 27  | 2  | 0.355295708921217    |   |
| MV_Schw | A | 5966 | 99  | 1  | 0.944879389258477    |   |
| MV_Schw | G | 5967 | 107 | 4  | 0.619556855087002    |   |
| MV_Schw | A | 5968 | 186 | 13 | 0.000394393843959228 |   |
| MV_Schw | T | 5969 | 45  | 1  |                      | 1 |
| MV_Schw | G | 5970 | 68  | 1  |                      | 1 |
| MV_Schw | A | 5971 | 16  | 0  |                      | 1 |
| MV_Schw | T | 5972 | 37  | 0  |                      | 1 |
| MV_Schw | A | 5973 | 14  | 0  |                      | 1 |
| MV_Schw | T | 5974 | 39  | 1  |                      | 1 |

|         |   |      |     |   |                   |   |
|---------|---|------|-----|---|-------------------|---|
| MV_Schw | T | 5975 | 174 | 4 |                   | 1 |
| MV_Schw | G | 5976 | 153 | 7 | 0.228458243153358 |   |
| MV_Schw | G | 5977 | 190 | 3 |                   | 1 |
| MV_Schw | C | 5978 | 112 | 1 | 0.789229943133706 |   |
| MV_Schw | T | 5979 | 29  | 0 |                   | 1 |
| MV_Schw | G | 5980 | 386 | 7 |                   | 1 |
| MV_Schw | T | 5981 | 109 | 0 | 0.381672248067152 |   |
| MV_Schw | T | 5982 | 141 | 3 |                   | 1 |
| MV_Schw | C | 5983 | 81  | 2 |                   | 1 |
| MV_Schw | A | 5984 | 248 | 2 | 0.528869794103543 |   |
| MV_Schw | G | 5985 | 70  | 0 | 0.789229943133706 |   |
| MV_Schw | G | 5986 | 157 | 3 |                   | 1 |
| MV_Schw | G | 5987 | 62  | 1 |                   | 1 |
| MV_Schw | T | 5988 | 2   | 0 |                   | 1 |
| MV_Schw | G | 5989 | 141 | 3 |                   | 1 |
| MV_Schw | T | 5990 | 39  | 1 |                   | 1 |
| MV_Schw | C | 5991 | 81  | 3 | 0.88950624150852  |   |
| MV_Schw | C | 5992 | 174 | 3 |                   | 1 |
| MV_Schw | A | 5993 | 60  | 1 |                   | 1 |
| MV_Schw | A | 5994 | 21  | 1 |                   | 1 |
| MV_Schw | G | 5995 | 217 | 2 | 0.740382532463064 |   |
| MV_Schw | A | 5996 | 29  | 0 |                   | 1 |
| MV_Schw | C | 5997 | 93  | 1 |                   | 1 |
| MV_Schw | T | 5998 | 10  | 0 |                   | 1 |
| MV_Schw | A | 5999 | 4   | 0 |                   | 1 |
| MV_Schw | C | 6000 | 54  | 0 | 0.950262622850522 |   |
| MV_Schw | A | 6001 | 31  | 1 |                   | 1 |
| MV_Schw | T | 6002 | 31  | 0 |                   | 1 |
| MV_Schw | C | 6003 | 120 | 1 |                   | 1 |
| MV_Schw | A | 6004 | 6   | 0 |                   | 1 |
| MV_Schw | A | 6005 | 21  | 0 |                   | 1 |
| MV_Schw | T | 6006 | 25  | 1 | 0.704667204683568 |   |
| MV_Schw | A | 6007 | 78  | 0 | 0.638894311640422 |   |
| MV_Schw | A | 6008 | 6   | 0 |                   | 1 |
| MV_Schw | T | 6009 | 23  | 0 |                   | 1 |
| MV_Schw | G | 6010 | 45  | 1 |                   | 1 |



|         |   |      |     |   |                   |   |
|---------|---|------|-----|---|-------------------|---|
| MV_Schw | A | 6011 | 60  | 1 |                   | 1 |
| MV_Schw | G | 6012 | 91  | 1 |                   | 1 |
| MV_Schw | C | 6013 | 124 | 1 | 0.791667533131283 |   |
| MV_Schw | T | 6014 | 10  | 1 | 0.307480793677112 |   |
| MV_Schw | G | 6015 | 66  | 0 | 0.789229943133706 |   |
| MV_Schw | A | 6016 | 16  | 1 | 0.950262622850522 |   |
| MV_Schw | T | 6017 | 95  | 1 |                   | 1 |
| MV_Schw | A | 6018 | 41  | 0 |                   | 1 |
| MV_Schw | C | 6019 | 47  | 1 |                   | 1 |
| MV_Schw | C | 6020 | 91  | 1 |                   | 1 |
| MV_Schw | G | 6021 | 66  | 2 |                   | 1 |
| MV_Schw | T | 6022 | 62  | 1 |                   | 1 |
| MV_Schw | C | 6023 | 254 | 9 | 0.462734918202348 |   |
| MV_Schw | T | 6024 | 138 | 3 |                   | 1 |
| MV_Schw | A | 6025 | 27  | 0 |                   | 1 |
| MV_Schw | T | 6026 | 16  | 1 | 0.950262622850522 |   |
| MV_Schw | G | 6027 | 70  | 1 |                   | 1 |
| MV_Schw | A | 6028 | 14  | 0 |                   | 1 |
| MV_Schw | A | 6029 | 16  | 1 | 0.950262622850522 |   |
| MV_Schw | C | 6030 | 78  | 0 | 0.638894311640422 |   |
| MV_Schw | C | 6031 | 167 | 3 |                   | 1 |
| MV_Schw | A | 6032 | 10  | 0 |                   | 1 |
| MV_Schw | A | 6033 | 12  | 1 | 0.88950624150852  |   |
| MV_Schw | C | 6034 | 143 | 1 | 0.542465567021569 |   |
| MV_Schw | T | 6035 | 17  | 0 |                   | 1 |
| MV_Schw | A | 6036 | 4   | 0 |                   | 1 |
| MV_Schw | T | 6037 | 0   | 0 |                   | 1 |
| MV_Schw | C | 6038 | 17  | 0 |                   | 1 |
| MV_Schw | T | 6039 | 27  | 1 | 0.752394317790241 |   |
| MV_Schw | T | 6040 | 33  | 1 |                   | 1 |
| MV_Schw | G | 6041 | 167 | 1 | 0.341186273229673 |   |
| MV_Schw | T | 6042 | 14  | 0 |                   | 1 |
| MV_Schw | G | 6043 | 68  | 0 | 0.789229943133706 |   |
| MV_Schw | A | 6044 | 157 | 1 | 0.88950624150852  |   |
| MV_Schw | T | 6045 | 21  | 0 |                   | 1 |
| MV_Schw | T | 6046 | 6   | 0 |                   | 1 |

|         |   |      |     |    |                    |   |
|---------|---|------|-----|----|--------------------|---|
| MV_Schw | T | 6047 | 52  | 1  |                    | 1 |
| MV_Schw | A | 6048 | 21  | 0  |                    | 1 |
| MV_Schw | A | 6049 | 50  | 1  |                    | 1 |
| MV_Schw | T | 6050 | 85  | 1  |                    | 1 |
| MV_Schw | C | 6051 | 58  | 0  | 0.953489044526869  |   |
| MV_Schw | G | 6052 | 66  | 1  |                    | 1 |
| MV_Schw | G | 6053 | 72  | 1  |                    | 1 |
| MV_Schw | C | 6054 | 223 | 4  |                    | 1 |
| MV_Schw | C | 6055 | 138 | 4  | 0.997314673407775  |   |
| MV_Schw | A | 6056 | 79  | 3  | 0.882548734849042  |   |
| MV_Schw | G | 6057 | 101 | 3  | 0.789229943133706  |   |
| MV_Schw | A | 6058 | 2   | 0  |                    | 1 |
| MV_Schw | A | 6059 | 23  | 1  |                    | 1 |
| MV_Schw | G | 6060 | 41  | 1  | 0.945767847051808  |   |
| MV_Schw | C | 6061 | 271 | 9  | 0.613704602620564  |   |
| MV_Schw | T | 6062 | 78  | 1  |                    | 1 |
| MV_Schw | C | 6063 | 109 | 2  |                    | 1 |
| MV_Schw | G | 6064 | 202 | 9  | 0.0722143977647632 |   |
| MV_Schw | G | 6065 | 271 | 12 | 0.0471627462270879 |   |
| MV_Schw | G | 6066 | 58  | 1  |                    | 1 |
| MV_Schw | C | 6067 | 136 | 3  |                    | 1 |
| MV_Schw | T | 6068 | 10  | 0  |                    | 1 |
| MV_Schw | C | 6069 | 14  | 1  | 0.426789350155389  |   |
| MV_Schw | A | 6070 | 19  | 1  | 0.57780206681461   |   |
| MV_Schw | A | 6071 | 74  | 0  | 0.795198078226602  |   |
| MV_Schw | A | 6072 | 33  | 3  | 0.197209929577240  |   |
| MV_Schw | T | 6073 | 41  | 1  |                    | 1 |
| MV_Schw | T | 6074 | 25  | 1  | 0.704667204683568  |   |
| MV_Schw | G | 6075 | 21  | 0  |                    | 1 |
| MV_Schw | C | 6076 | 250 | 3  | 0.99869736415243   |   |
| MV_Schw | T | 6077 | 83  | 4  | 0.311085536765447  |   |
| MV_Schw | C | 6078 | 130 | 2  |                    | 1 |
| MV_Schw | A | 6079 | 16  | 0  |                    | 1 |
| MV_Schw | G | 6080 | 19  | 0  |                    | 1 |
| MV_Schw | A | 6081 | 8   | 0  |                    | 1 |
| MV_Schw | T | 6082 | 21  | 3  | 0.0746595992424665 |   |

|         |   |      |     |   |                   |   |
|---------|---|------|-----|---|-------------------|---|
| MV_Schw | A | 6083 | 19  | 1 |                   | 1 |
| MV_Schw | C | 6084 | 6   | 0 |                   | 1 |
| MV_Schw | T | 6085 | 4   | 0 |                   | 1 |
| MV_Schw | A | 6086 | 23  | 0 |                   | 1 |
| MV_Schw | T | 6087 | 27  | 1 | 0.752394317790241 | 1 |
| MV_Schw | A | 6088 | 10  | 0 |                   | 1 |
| MV_Schw | C | 6089 | 196 | 5 |                   | 1 |
| MV_Schw | A | 6090 | 10  | 0 |                   | 1 |
| MV_Schw | G | 6091 | 47  | 1 |                   | 1 |
| MV_Schw | A | 6092 | 39  | 1 |                   | 1 |
| MV_Schw | A | 6093 | 12  | 0 |                   | 1 |
| MV_Schw | A | 6094 | 74  | 3 | 0.831755077907185 | 1 |
| MV_Schw | T | 6095 | 29  | 0 |                   | 1 |
| MV_Schw | C | 6096 | 91  | 1 |                   | 1 |
| MV_Schw | C | 6097 | 54  | 1 |                   | 1 |
| MV_Schw | T | 6098 | 19  | 1 | 0.57780206681461  | 1 |
| MV_Schw | G | 6099 | 207 | 7 | 0.628989544511172 | 1 |
| MV_Schw | T | 6100 | 14  | 0 |                   | 1 |
| MV_Schw | C | 6101 | 56  | 1 |                   | 1 |
| MV_Schw | A | 6102 | 27  | 0 |                   | 1 |
| MV_Schw | T | 6103 | 0   | 0 |                   | 1 |
| MV_Schw | T | 6104 | 8   | 0 |                   | 1 |
| MV_Schw | A | 6105 | 29  | 1 | 0.789229943133706 | 1 |
| MV_Schw | T | 6106 | 62  | 1 |                   | 1 |
| MV_Schw | T | 6107 | 10  | 0 |                   | 1 |
| MV_Schw | T | 6108 | 17  | 1 | 0.528591092326266 | 1 |
| MV_Schw | G | 6109 | 103 | 1 |                   | 1 |
| MV_Schw | G | 6110 | 14  | 0 |                   | 1 |
| MV_Schw | C | 6111 | 97  | 1 |                   | 1 |
| MV_Schw | C | 6112 | 17  | 1 | 0.983041048229953 | 1 |
| MV_Schw | C | 6113 | 14  | 0 |                   | 1 |
| MV_Schw | C | 6114 | 4   | 0 |                   | 1 |
| MV_Schw | A | 6115 | 21  | 1 | 0.632968068765344 | 1 |
| MV_Schw | G | 6116 | 103 | 1 | 0.944879389258477 | 1 |
| MV_Schw | T | 6117 | 12  | 1 | 0.88950624150852  | 1 |
| MV_Schw | T | 6118 | 4   | 0 |                   | 1 |

|         |   |      |     |   |                   |   |
|---------|---|------|-----|---|-------------------|---|
| MV_Schw | T | 6119 | 12  | 0 |                   | 1 |
| MV_Schw | A | 6120 | 4   | 1 | 0.619556855087002 |   |
| MV_Schw | C | 6121 | 155 | 3 |                   | 1 |
| MV_Schw | G | 6122 | 105 | 1 | 0.944944073306986 |   |
| MV_Schw | G | 6123 | 27  | 3 | 0.128277619623459 |   |
| MV_Schw | G | 6124 | 2   | 0 |                   | 1 |
| MV_Schw | A | 6125 | 0   | 0 |                   | 1 |
| MV_Schw | C | 6126 | 16  | 1 | 0.483965165529824 |   |
| MV_Schw | C | 6127 | 128 | 4 | 0.840295409296105 |   |
| MV_Schw | C | 6128 | 17  | 1 | 0.983041048229953 |   |
| MV_Schw | C | 6129 | 23  | 1 | 0.658415249679101 |   |
| MV_Schw | A | 6130 | 10  | 0 |                   | 1 |
| MV_Schw | T | 6131 | 8   | 0 |                   | 1 |
| MV_Schw | A | 6132 | 4   | 0 |                   | 1 |
| MV_Schw | T | 6133 | 4   | 0 |                   | 1 |
| MV_Schw | C | 6134 | 76  | 1 |                   | 1 |
| MV_Schw | T | 6135 | 21  | 1 | 0.632968068765344 |   |
| MV_Schw | G | 6136 | 103 | 2 |                   | 1 |
| MV_Schw | C | 6137 | 289 | 6 |                   | 1 |
| MV_Schw | G | 6138 | 477 | 8 |                   | 1 |
| MV_Schw | G | 6139 | 134 | 5 | 0.704667204683568 |   |
| MV_Schw | A | 6140 | 10  | 1 | 0.822598489333375 |   |
| MV_Schw | G | 6141 | 33  | 0 |                   | 1 |
| MV_Schw | A | 6142 | 2   | 1 | 0.491835918445353 |   |
| MV_Schw | T | 6143 | 105 | 4 | 0.603755373639587 |   |
| MV_Schw | A | 6144 | 45  | 2 | 0.65158773158174  |   |
| MV_Schw | T | 6145 | 27  | 1 |                   | 1 |
| MV_Schw | C | 6146 | 23  | 1 |                   | 1 |
| MV_Schw | T | 6147 | 2   | 0 |                   | 1 |
| MV_Schw | A | 6148 | 58  | 1 |                   | 1 |
| MV_Schw | T | 6149 | 19  | 1 | 0.57780206681461  |   |
| MV_Schw | C | 6150 | 95  | 3 |                   | 1 |
| MV_Schw | C | 6151 | 238 | 7 | 0.667619064364632 |   |
| MV_Schw | A | 6152 | 19  | 0 |                   | 1 |
| MV_Schw | G | 6153 | 14  | 2 | 0.125475779768559 |   |
| MV_Schw | G | 6154 | 91  | 5 | 0.217911555108928 |   |

|         |   |      |     |   |                    |   |
|---------|---|------|-----|---|--------------------|---|
| MV_Schw | C | 6155 | 85  | 2 |                    | 1 |
| MV_Schw | T | 6156 | 23  | 1 | 0.658415249679101  |   |
| MV_Schw | T | 6157 | 17  | 1 | 0.983041048229953  |   |
| MV_Schw | T | 6158 | 8   | 0 |                    | 1 |
| MV_Schw | G | 6159 | 25  | 1 |                    | 1 |
| MV_Schw | A | 6160 | 4   | 0 |                    | 1 |
| MV_Schw | G | 6161 | 81  | 3 | 0.88950624150852   |   |
| MV_Schw | C | 6162 | 8   | 1 | 0.789229943133706  |   |
| MV_Schw | T | 6163 | 4   | 0 |                    | 1 |
| MV_Schw | A | 6164 | 14  | 0 |                    | 1 |
| MV_Schw | T | 6165 | 48  | 1 |                    | 1 |
| MV_Schw | G | 6166 | 27  | 1 |                    | 1 |
| MV_Schw | C | 6167 | 17  | 0 |                    | 1 |
| MV_Schw | G | 6168 | 52  | 3 | 0.445919862395878  |   |
| MV_Schw | C | 6169 | 97  | 1 |                    | 1 |
| MV_Schw | T | 6170 | 41  | 1 | 0.945767847051808  |   |
| MV_Schw | T | 6171 | 33  | 1 |                    | 1 |
| MV_Schw | G | 6172 | 161 | 7 | 0.264144831191316  |   |
| MV_Schw | G | 6173 | 29  | 1 | 0.789229943133706  |   |
| MV_Schw | A | 6174 | 21  | 1 | 0.632968068765344  |   |
| MV_Schw | G | 6175 | 140 | 5 | 0.560243889454362  |   |
| MV_Schw | G | 6176 | 221 | 7 | 0.783925131106103  |   |
| MV_Schw | A | 6177 | 8   | 1 | 0.789229943133706  |   |
| MV_Schw | G | 6178 | 81  | 2 |                    | 1 |
| MV_Schw | A | 6179 | 8   | 0 |                    | 1 |
| MV_Schw | C | 6180 | 188 | 5 |                    | 1 |
| MV_Schw | A | 6181 | 25  | 1 |                    | 1 |
| MV_Schw | T | 6182 | 12  | 0 |                    | 1 |
| MV_Schw | C | 6183 | 124 | 7 | 0.0769928239219915 |   |
| MV_Schw | A | 6184 | 14  | 0 |                    | 1 |
| MV_Schw | A | 6185 | 52  | 1 |                    | 1 |
| MV_Schw | T | 6186 | 25  | 0 |                    | 1 |
| MV_Schw | A | 6187 | 17  | 1 | 0.983041048229953  |   |
| MV_Schw | A | 6188 | 8   | 0 |                    | 1 |
| MV_Schw | G | 6189 | 27  | 0 |                    | 1 |
| MV_Schw | G | 6190 | 25  | 1 | 0.704667204683568  |   |

|         |   |      |      |    |                    |   |
|---------|---|------|------|----|--------------------|---|
| MV_Schw | T | 6191 | 14   | 0  |                    | 1 |
| MV_Schw | G | 6192 | 56   | 1  |                    | 1 |
| MV_Schw | T | 6193 | 16   | 0  |                    | 1 |
| MV_Schw | T | 6194 | 33   | 1  | 0.822598489333375  |   |
| MV_Schw | A | 6195 | 47   | 1  |                    | 1 |
| MV_Schw | G | 6196 | 109  | 3  |                    | 1 |
| MV_Schw | A | 6197 | 112  | 2  |                    | 1 |
| MV_Schw | A | 6198 | 25   | 1  |                    | 1 |
| MV_Schw | A | 6199 | 10   | 1  | 0.822598489333375  |   |
| MV_Schw | A | 6200 | 45   | 1  |                    | 1 |
| MV_Schw | G | 6201 | 45   | 2  | 0.65158773158174   |   |
| MV_Schw | C | 6202 | 1149 | 26 |                    | 1 |
| MV_Schw | T | 6203 | 41   | 0  |                    | 1 |
| MV_Schw | C | 6204 | 194  | 5  | 0.950262622850522  |   |
| MV_Schw | G | 6205 | 25   | 1  |                    | 1 |
| MV_Schw | G | 6206 | 85   | 1  |                    | 1 |
| MV_Schw | A | 6207 | 25   | 1  | 0.704667204683568  |   |
| MV_Schw | T | 6208 | 14   | 0  |                    | 1 |
| MV_Schw | A | 6209 | 6    | 0  |                    | 1 |
| MV_Schw | C | 6210 | 41   | 0  |                    | 1 |
| MV_Schw | A | 6211 | 19   | 0  |                    | 1 |
| MV_Schw | G | 6212 | 244  | 11 | 0.0804744449323579 |   |
| MV_Schw | T | 6213 | 43   | 0  |                    | 1 |
| MV_Schw | G | 6214 | 47   | 0  |                    | 1 |
| MV_Schw | G | 6215 | 72   | 1  |                    | 1 |
| MV_Schw | A | 6216 | 54   | 3  | 0.237817203872315  |   |
| MV_Schw | G | 6217 | 101  | 3  |                    | 1 |
| MV_Schw | G | 6218 | 238  | 7  | 0.909523240599174  |   |
| MV_Schw | T | 6219 | 8    | 1  | 0.789229943133706  |   |
| MV_Schw | G | 6220 | 267  | 6  |                    | 1 |
| MV_Schw | A | 6221 | 101  | 4  | 0.576193745443697  |   |
| MV_Schw | T | 6222 | 41   | 1  |                    | 1 |
| MV_Schw | T | 6223 | 64   | 3  | 0.609091736782917  |   |
| MV_Schw | T | 6224 | 43   | 2  | 0.632968068765344  |   |
| MV_Schw | A | 6225 | 16   | 0  |                    | 1 |
| MV_Schw | C | 6226 | 145  | 4  |                    | 1 |

|         |   |      |      |    |                      |
|---------|---|------|------|----|----------------------|
| MV_Schw | T | 6227 | 353  | 17 | 0.00513119326731813  |
| MV_Schw | G | 6228 | 159  | 6  | 0.480116689938494    |
| MV_Schw | G | 6229 | 314  | 15 | 0.0126609310765252   |
| MV_Schw | G | 6230 | 202  | 6  | 0.840650609827031    |
| MV_Schw | C | 6231 | 29   | 1  | 1                    |
| MV_Schw | A | 6232 | 74   | 1  | 1                    |
| MV_Schw | T | 6233 | 21   | 0  | 1                    |
| MV_Schw | C | 6234 | 273  | 10 | 0.307085127613128    |
| MV_Schw | T | 6235 | 31   | 1  | 1                    |
| MV_Schw | T | 6236 | 114  | 4  | 0.658415249679101    |
| MV_Schw | A | 6237 | 39   | 0  | 1                    |
| MV_Schw | G | 6238 | 87   | 3  | 0.704667204683568    |
| MV_Schw | A | 6239 | 8    | 0  | 1                    |
| MV_Schw | G | 6240 | 186  | 7  | 0.44055837109039     |
| MV_Schw | A | 6241 | 12   | 0  | 1                    |
| MV_Schw | G | 6242 | 97   | 2  | 1                    |
| MV_Schw | C | 6243 | 178  | 7  | 0.296710762771661    |
| MV_Schw | G | 6244 | 105  | 7  | 0.0321952249600374   |
| MV_Schw | G | 6245 | 413  | 17 | 0.0193618397969109   |
| MV_Schw | A | 6246 | 14   | 2  | 0.125475779768559    |
| MV_Schw | G | 6247 | 250  | 8  | 0.57647375993204     |
| MV_Schw | G | 6248 | 64   | 4  | 0.158900683800736    |
| MV_Schw | A | 6249 | 43   | 3  | 0.308038546605154    |
| MV_Schw | A | 6250 | 21   | 1  | 1                    |
| MV_Schw | T | 6251 | 52   | 1  | 1                    |
| MV_Schw | A | 6252 | 70   | 3  | 0.395791012435089    |
| MV_Schw | A | 6253 | 16   | 1  | 0.950262622850522    |
| MV_Schw | A | 6254 | 2    | 1  | 0.491835918445353    |
| MV_Schw | G | 6255 | 322  | 17 | 0.000741569904151212 |
| MV_Schw | G | 6256 | 83   | 3  | 0.678058690427187    |
| MV_Schw | C | 6257 | 236  | 14 | 0.000886598205683316 |
| MV_Schw | C | 6258 | 262  | 11 | 0.147844505379043    |
| MV_Schw | C | 6259 | 609  | 23 | 0.0249103481277176   |
| MV_Schw | G | 6260 | 2388 | 60 | 0.37877131423274     |
| MV_Schw | G | 6261 | 547  | 17 | 0.340937322426109    |
| MV_Schw | A | 6262 | 112  | 3  | 0.950262622850522    |

|         |   |      |      |    |                    |   |
|---------|---|------|------|----|--------------------|---|
| MV_Schw | T | 6263 | 79   | 1  |                    | 1 |
| MV_Schw | A | 6264 | 70   | 1  |                    | 1 |
| MV_Schw | A | 6265 | 8    | 0  |                    | 1 |
| MV_Schw | C | 6266 | 1572 | 32 |                    | 1 |
| MV_Schw | T | 6267 | 16   | 0  |                    | 1 |
| MV_Schw | C | 6268 | 196  | 5  | 0.950262622850522  |   |
| MV_Schw | A | 6269 | 10   | 1  | 0.822598489333375  |   |
| MV_Schw | C | 6270 | 217  | 4  |                    | 1 |
| MV_Schw | G | 6271 | 260  | 3  | 0.939506000333287  |   |
| MV_Schw | T | 6272 | 72   | 1  |                    | 1 |
| MV_Schw | C | 6273 | 64   | 1  |                    | 1 |
| MV_Schw | G | 6274 | 52   | 1  |                    | 1 |
| MV_Schw | A | 6275 | 29   | 1  |                    | 1 |
| MV_Schw | C | 6276 | 333  | 9  | 0.966560423700072  |   |
| MV_Schw | A | 6277 | 27   | 0  |                    | 1 |
| MV_Schw | C | 6278 | 203  | 1  | 0.44280652126772   |   |
| MV_Schw | A | 6279 | 12   | 0  |                    | 1 |
| MV_Schw | G | 6280 | 23   | 0  |                    | 1 |
| MV_Schw | A | 6281 | 124  | 2  |                    | 1 |
| MV_Schw | G | 6282 | 68   | 2  |                    | 1 |
| MV_Schw | T | 6283 | 37   | 0  |                    | 1 |
| MV_Schw | C | 6284 | 35   | 0  |                    | 1 |
| MV_Schw | C | 6285 | 93   | 1  |                    | 1 |
| MV_Schw | T | 6286 | 16   | 1  | 0.950262622850522  |   |
| MV_Schw | A | 6287 | 54   | 1  |                    | 1 |
| MV_Schw | C | 6288 | 285  | 1  | 0.0364439659893172 |   |
| MV_Schw | T | 6289 | 23   | 1  |                    | 1 |
| MV_Schw | T | 6290 | 19   | 0  |                    | 1 |
| MV_Schw | C | 6291 | 12   | 0  |                    | 1 |
| MV_Schw | A | 6292 | 62   | 0  | 0.789229943133706  |   |
| MV_Schw | T | 6293 | 23   | 2  | 0.296710762771661  |   |
| MV_Schw | T | 6294 | 33   | 1  |                    | 1 |
| MV_Schw | G | 6295 | 107  | 4  | 0.619556855087002  |   |
| MV_Schw | T | 6296 | 4    | 0  |                    | 1 |
| MV_Schw | C | 6297 | 112  | 1  |                    | 1 |
| MV_Schw | C | 6298 | 725  | 23 | 0.17325046551955   |   |



|         |   |      |     |    |                    |   |
|---------|---|------|-----|----|--------------------|---|
| MV_Schw | T | 6299 | 41  | 1  |                    | 1 |
| MV_Schw | C | 6300 | 54  | 1  |                    | 1 |
| MV_Schw | A | 6301 | 68  | 1  |                    | 1 |
| MV_Schw | G | 6302 | 169 | 5  | 0.945767847051808  |   |
| MV_Schw | T | 6303 | 12  | 0  |                    | 1 |
| MV_Schw | A | 6304 | 19  | 0  |                    | 1 |
| MV_Schw | T | 6305 | 31  | 1  |                    | 1 |
| MV_Schw | A | 6306 | 23  | 1  |                    | 1 |
| MV_Schw | G | 6307 | 151 | 1  | 0.88950624150852   |   |
| MV_Schw | C | 6308 | 473 | 10 |                    | 1 |
| MV_Schw | C | 6309 | 76  | 1  |                    | 1 |
| MV_Schw | T | 6310 | 27  | 1  |                    | 1 |
| MV_Schw | A | 6311 | 39  | 0  |                    | 1 |
| MV_Schw | T | 6312 | 83  | 1  |                    | 1 |
| MV_Schw | C | 6313 | 89  | 1  |                    | 1 |
| MV_Schw | C | 6314 | 434 | 7  |                    | 1 |
| MV_Schw | G | 6315 | 287 | 5  |                    | 1 |
| MV_Schw | A | 6316 | 8   | 1  | 0.789229943133706  |   |
| MV_Schw | C | 6317 | 576 | 19 | 0.125475779768559  |   |
| MV_Schw | G | 6318 | 141 | 5  | 0.742170203109886  |   |
| MV_Schw | C | 6319 | 78  | 3  | 0.863499923807603  |   |
| MV_Schw | T | 6320 | 16  | 0  |                    | 1 |
| MV_Schw | G | 6321 | 107 | 3  |                    | 1 |
| MV_Schw | T | 6322 | 47  | 2  | 0.678058690427187  |   |
| MV_Schw | C | 6323 | 264 | 3  | 0.940669409851862  |   |
| MV_Schw | C | 6324 | 221 | 5  |                    | 1 |
| MV_Schw | G | 6325 | 320 | 7  |                    | 1 |
| MV_Schw | A | 6326 | 76  | 1  |                    | 1 |
| MV_Schw | G | 6327 | 983 | 28 | 0.302325351392248  |   |
| MV_Schw | A | 6328 | 101 | 3  | 0.789229943133706  |   |
| MV_Schw | T | 6329 | 252 | 7  |                    | 1 |
| MV_Schw | T | 6330 | 14  | 0  |                    | 1 |
| MV_Schw | A | 6331 | 16  | 1  | 0.950262622850522  |   |
| MV_Schw | A | 6332 | 87  | 1  |                    | 1 |
| MV_Schw | G | 6333 | 312 | 4  | 0.863499923807603  |   |
| MV_Schw | G | 6334 | 512 | 19 | 0.0350427011683614 |   |

|         |   |      |      |    |                      |   |
|---------|---|------|------|----|----------------------|---|
| MV_Schw | G | 6335 | 54   | 1  |                      | 1 |
| MV_Schw | G | 6336 | 72   | 2  |                      | 1 |
| MV_Schw | G | 6337 | 79   | 2  |                      | 1 |
| MV_Schw | T | 6338 | 209  | 5  |                      | 1 |
| MV_Schw | G | 6339 | 149  | 5  | 0.599534349993353    |   |
| MV_Schw | A | 6340 | 83   | 0  | 0.645428736569362    |   |
| MV_Schw | T | 6341 | 45   | 0  |                      | 1 |
| MV_Schw | T | 6342 | 176  | 5  |                      | 1 |
| MV_Schw | G | 6343 | 440  | 7  | 0.950262622850522    |   |
| MV_Schw | T | 6344 | 25   | 1  |                      | 1 |
| MV_Schw | C | 6345 | 277  | 9  | 0.4069629773352      |   |
| MV_Schw | C | 6346 | 1252 | 39 | 0.0505280298568461   |   |
| MV_Schw | A | 6347 | 397  | 9  |                      | 1 |
| MV_Schw | C | 6348 | 444  | 21 | 0.000632234173031295 |   |
| MV_Schw | C | 6349 | 192  | 7  | 0.565378974481248    |   |
| MV_Schw | G | 6350 | 147  | 4  |                      | 1 |
| MV_Schw | G | 6351 | 409  | 21 | 0.000497052534051072 |   |
| MV_Schw | C | 6352 | 114  | 4  | 0.658415249679101    |   |
| MV_Schw | T | 6353 | 176  | 8  | 0.126418646194306    |   |
| MV_Schw | A | 6354 | 66   | 5  | 0.0239036682558459   |   |
| MV_Schw | G | 6355 | 105  | 4  | 0.603755373639587    |   |
| MV_Schw | A | 6356 | 70   | 5  | 0.0854785497754524   |   |
| MV_Schw | G | 6357 | 95   | 7  | 0.0187937969661973   |   |
| MV_Schw | G | 6358 | 300  | 19 | 3.01092630298597e-05 |   |
| MV_Schw | G | 6359 | 31   | 3  | 0.0518737301478137   |   |
| MV_Schw | G | 6360 | 78   | 6  | 0.0177648680200563   |   |
| MV_Schw | G | 6361 | 502  | 19 | 0.03148485115913     |   |
| MV_Schw | T | 6362 | 58   | 5  | 0.0132175001443654   |   |
| MV_Schw | C | 6363 | 411  | 23 | 3.75216585877020e-05 |   |
| MV_Schw | T | 6364 | 8    | 1  | 0.258627633593378    |   |
| MV_Schw | C | 6365 | 99   | 3  |                      | 1 |
| MV_Schw | G | 6366 | 603  | 36 | 3.30692364190224e-09 |   |
| MV_Schw | T | 6367 | 134  | 5  | 0.397437008479015    |   |
| MV_Schw | A | 6368 | 97   | 4  | 0.550155392537109    |   |
| MV_Schw | C | 6369 | 161  | 3  |                      | 1 |
| MV_Schw | A | 6370 | 19   | 0  |                      | 1 |

|         |   |      |     |   |                     |
|---------|---|------|-----|---|---------------------|
| MV_Schw | A | 6371 | 4   | 0 | 1                   |
| MV_Schw | C | 6372 | 85  | 6 | 0.0290565201324091  |
| MV_Schw | A | 6373 | 31  | 2 | 0.428411386231373   |
| MV_Schw | T | 6374 | 58  | 3 | 0.528591092326266   |
| MV_Schw | A | 6375 | 43  | 1 | 1                   |
| MV_Schw | G | 6376 | 97  | 5 | 0.125475779768559   |
| MV_Schw | G | 6377 | 35  | 2 | 0.497615650989996   |
| MV_Schw | C | 6378 | 21  | 1 | 1                   |
| MV_Schw | T | 6379 | 68  | 6 | 0.00856366347444603 |
| MV_Schw | C | 6380 | 153 | 4 | 1                   |
| MV_Schw | T | 6381 | 60  | 3 | 0.298698990757132   |
| MV_Schw | C | 6382 | 229 | 7 | 0.88950624150852    |
| MV_Schw | A | 6383 | 64  | 3 | 0.609091736782917   |
| MV_Schw | A | 6384 | 52  | 3 | 0.445919862395878   |
| MV_Schw | G | 6385 | 163 | 3 | 1                   |
| MV_Schw | A | 6386 | 19  | 0 | 1                   |
| MV_Schw | G | 6387 | 172 | 6 | 0.53158647232894    |
| MV_Schw | T | 6388 | 27  | 0 | 1                   |
| MV_Schw | G | 6389 | 41  | 0 | 1                   |
| MV_Schw | G | 6390 | 120 | 1 | 0.789229943133706   |
| MV_Schw | T | 6391 | 14  | 1 | 0.944879389258477   |
| MV_Schw | A | 6392 | 47  | 1 | 1                   |
| MV_Schw | T | 6393 | 39  | 2 | 0.560243889454362   |
| MV_Schw | A | 6394 | 12  | 1 | 0.88950624150852    |
| MV_Schw | C | 6395 | 56  | 1 | 1                   |
| MV_Schw | C | 6396 | 29  | 1 | 1                   |
| MV_Schw | A | 6397 | 37  | 1 | 1                   |
| MV_Schw | C | 6398 | 207 | 2 | 0.734151152837751   |
| MV_Schw | T | 6399 | 19  | 0 | 1                   |
| MV_Schw | G | 6400 | 205 | 3 | 1                   |
| MV_Schw | T | 6401 | 41  | 0 | 1                   |
| MV_Schw | G | 6402 | 79  | 1 | 1                   |
| MV_Schw | C | 6403 | 202 | 1 | 0.216853413677777   |
| MV_Schw | C | 6404 | 56  | 1 | 1                   |
| MV_Schw | C | 6405 | 300 | 6 | 1                   |
| MV_Schw | A | 6406 | 93  | 2 | 1                   |

|         |    |      |     |   |                   |    |
|---------|----|------|-----|---|-------------------|----|
| MV_Schw | A  | 6407 | 25  | 0 |                   | 1  |
| MV_Schw | G  | 6408 | 329 | 5 |                   | 1  |
| MV_Schw | T  | 6409 | 10  | 0 |                   | 1  |
| MV_Schw | A  | 6410 | 14  | 0 |                   | 1  |
| MV_Schw | T  | 6411 | 10  | 1 | 0.822598489333375 |    |
| MV_Schw | G  | 6412 | 85  | 3 | 0.918952129071198 |    |
| MV_Schw | T  | 6413 | 114 | 3 |                   | 1  |
| MV_Schw | T  | 6414 | 85  | 3 | 0.918952129071198 |    |
| MV_Schw | G  | 6415 | 172 | 3 |                   | 1  |
| MV_Schw | C  | 6416 | 107 | 1 | 0.945767847051808 |    |
| MV_Schw | A  | 6417 | 4   | 1 | 0.619556855087002 |    |
| MV_Schw | A  | 6418 | 153 | 4 |                   | 1  |
| MV_Schw | C  | 6419 | 297 | 4 | 0.950262622850522 |    |
| MV_Schw | C  | 6420 | 62  | 1 |                   | 1  |
| MV_Schw | C  | 6421 | 64  | 0 | 0.789229943133706 |    |
| MV_Schw | A  | 6422 | 48  | 0 | 0.950262622850522 |    |
| MV_Schw | A  | 6423 | 215 | 3 | 0.957721317456694 |    |
| MV_Schw | G  | 6424 | 242 | 3 | 0.996771597822493 |    |
| MV_Schw | G  | 6425 | 62  | 3 | 0.307480793677112 |    |
| MV_Schw | G  | 6426 | 45  | 1 |                   | 1  |
| MV_Schw | T  | 6427 | 8   | 0 |                   | 1  |
| MV_Schw | A  | 6428 | 21  | 0 |                   | 1  |
| MV_Schw | C  | 6429 | 87  | 1 |                   | 1  |
| MV_Schw | C  | 6430 | 203 | 3 |                   | 1  |
| MV_Schw | T  | 6431 | 12  | 0 |                   | 1  |
| MV_Schw | T  | 6432 | 17  | 0 |                   | 1  |
| MV_Schw | A  | 6433 | 14  | 0 |                   | 1  |
| MV_Schw | NA | 6434 | 0   | 0 |                   | NA |
| MV_Schw | C  | 6435 | 331 | 3 | 0.560243889454362 |    |
| MV_Schw | T  | 6436 | 58  | 0 | 0.953489044526869 |    |
| MV_Schw | C  | 6437 | 194 | 3 |                   | 1  |
| MV_Schw | G  | 6438 | 27  | 0 |                   | 1  |
| MV_Schw | A  | 6439 | 66  | 0 | 0.789229943133706 |    |
| MV_Schw | A  | 6440 | 89  | 0 | 0.497615650989996 |    |
| MV_Schw | T  | 6441 | 29  | 1 |                   | 1  |
| MV_Schw | NA | 6442 | 0   | 0 |                   | NA |

|         |   |      |     |    |                      |   |
|---------|---|------|-----|----|----------------------|---|
| MV_Schw | T | 6443 | 4   | 0  |                      | 1 |
| MV_Schw | T | 6444 | 14  | 1  | 0.944879389258477    |   |
| MV_Schw | G | 6445 | 426 | 8  |                      | 1 |
| MV_Schw | A | 6446 | 19  | 1  |                      | 1 |
| MV_Schw | T | 6447 | 23  | 1  |                      | 1 |
| MV_Schw | G | 6448 | 33  | 0  |                      | 1 |
| MV_Schw | A | 6449 | 4   | 0  |                      | 1 |
| MV_Schw | G | 6450 | 91  | 1  |                      | 1 |
| MV_Schw | T | 6451 | 64  | 1  |                      | 1 |
| MV_Schw | C | 6452 | 72  | 1  |                      | 1 |
| MV_Schw | A | 6453 | 62  | 1  |                      | 1 |
| MV_Schw | T | 6454 | 17  | 0  |                      | 1 |
| MV_Schw | C | 6455 | 78  | 3  | 0.863499923807603    |   |
| MV_Schw | G | 6456 | 324 | 13 | 0.0587145760188764   |   |
| MV_Schw | T | 6457 | 56  | 1  |                      | 1 |
| MV_Schw | G | 6458 | 159 | 7  | 0.152879709792478    |   |
| MV_Schw | T | 6459 | 37  | 1  | 0.88950624150852     |   |
| MV_Schw | A | 6460 | 43  | 6  | 0.000579362197996472 |   |
| MV_Schw | C | 6461 | 254 | 5  |                      | 1 |
| MV_Schw | T | 6462 | 81  | 0  | 0.641186461810141    |   |
| MV_Schw | T | 6463 | 50  | 4  | 0.0738869581900653   |   |
| MV_Schw | T | 6464 | 54  | 1  |                      | 1 |
| MV_Schw | C | 6465 | 95  | 5  | 0.118404761941972    |   |
| MV_Schw | A | 6466 | 238 | 20 | 5.03896889205454e-08 |   |
| MV_Schw | T | 6467 | 66  | 3  | 0.354972433257953    |   |
| MV_Schw | G | 6468 | 165 | 11 | 0.00246282628626668  |   |
| MV_Schw | C | 6469 | 128 | 2  |                      | 1 |
| MV_Schw | C | 6470 | 37  | 0  |                      | 1 |
| MV_Schw | A | 6471 | 48  | 3  | 0.390345857720356    |   |
| MV_Schw | G | 6472 | 459 | 22 | 0.000510563580926731 |   |
| MV_Schw | A | 6473 | 85  | 7  | 0.00993851370517883  |   |
| MV_Schw | G | 6474 | 223 | 5  |                      | 1 |
| MV_Schw | G | 6475 | 87  | 3  | 0.935220820395243    |   |
| MV_Schw | G | 6476 | 291 | 3  | 0.500212938980029    |   |
| MV_Schw | G | 6477 | 29  | 2  | 0.389821719583598    |   |
| MV_Schw | A | 6478 | 21  | 1  |                      | 1 |

|         |   |      |     |   |                   |
|---------|---|------|-----|---|-------------------|
| MV_Schw | C | 6479 | 207 | 7 | 0.628989544511172 |
| MV_Schw | T | 6480 | 47  | 1 | 1                 |
| MV_Schw | G | 6481 | 85  | 1 | 1                 |
| MV_Schw | T | 6482 | 109 | 2 | 1                 |
| MV_Schw | G | 6483 | 351 | 6 | 1                 |
| MV_Schw | T | 6484 | 151 | 3 | 1                 |
| MV_Schw | G | 6485 | 215 | 5 | 1                 |
| MV_Schw | C | 6486 | 118 | 1 | 1                 |
| MV_Schw | A | 6487 | 97  | 1 | 1                 |
| MV_Schw | G | 6488 | 271 | 6 | 1                 |
| MV_Schw | C | 6489 | 328 | 6 | 1                 |
| MV_Schw | C | 6490 | 72  | 1 | 1                 |
| MV_Schw | A | 6491 | 182 | 4 | 1                 |
| MV_Schw | A | 6492 | 31  | 0 | 1                 |
| MV_Schw | A | 6493 | 72  | 1 | 1                 |
| MV_Schw | A | 6494 | 58  | 1 | 1                 |
| MV_Schw | T | 6495 | 37  | 0 | 1                 |
| MV_Schw | G | 6496 | 112 | 1 | 0.789229943133706 |
| MV_Schw | C | 6497 | 33  | 1 | 1                 |
| MV_Schw | C | 6498 | 351 | 6 | 1                 |
| MV_Schw | T | 6499 | 14  | 0 | 1                 |
| MV_Schw | T | 6500 | 14  | 0 | 1                 |
| MV_Schw | G | 6501 | 6   | 1 | 0.704667204683568 |
| MV_Schw | T | 6502 | 21  | 0 | 1                 |
| MV_Schw | A | 6503 | 17  | 0 | 1                 |
| MV_Schw | C | 6504 | 140 | 2 | 1                 |
| MV_Schw | C | 6505 | 66  | 1 | 1                 |
| MV_Schw | C | 6506 | 74  | 1 | 1                 |
| MV_Schw | G | 6507 | 368 | 5 | 0.799284242354531 |
| MV_Schw | A | 6508 | 95  | 1 | 1                 |
| MV_Schw | T | 6509 | 409 | 6 | 0.950262622850522 |
| MV_Schw | G | 6510 | 23  | 1 | 1                 |
| MV_Schw | A | 6511 | 27  | 0 | 1                 |
| MV_Schw | G | 6512 | 122 | 2 | 1                 |
| MV_Schw | T | 6513 | 2   | 0 | 1                 |
| MV_Schw | C | 6514 | 79  | 0 | 0.639207655977387 |

|         |   |      |     |   |                   |   |
|---------|---|------|-----|---|-------------------|---|
| MV_Schw | C | 6515 | 126 | 1 |                   | 1 |
| MV_Schw | T | 6516 | 37  | 0 |                   | 1 |
| MV_Schw | C | 6517 | 136 | 3 |                   | 1 |
| MV_Schw | T | 6518 | 78  | 1 |                   | 1 |
| MV_Schw | G | 6519 | 60  | 1 |                   | 1 |
| MV_Schw | C | 6520 | 68  | 1 |                   | 1 |
| MV_Schw | T | 6521 | 17  | 0 |                   | 1 |
| MV_Schw | C | 6522 | 64  | 0 | 0.789229943133706 |   |
| MV_Schw | C | 6523 | 202 | 1 | 0.551026371204373 |   |
| MV_Schw | A | 6524 | 21  | 1 |                   | 1 |
| MV_Schw | A | 6525 | 47  | 1 |                   | 1 |
| MV_Schw | G | 6526 | 300 | 2 | 0.239446226094413 |   |
| MV_Schw | A | 6527 | 45  | 1 |                   | 1 |
| MV_Schw | A | 6528 | 25  | 0 |                   | 1 |
| MV_Schw | T | 6529 | 17  | 0 |                   | 1 |
| MV_Schw | G | 6530 | 128 | 1 |                   | 1 |
| MV_Schw | C | 6531 | 62  | 3 | 0.57780206681461  |   |
| MV_Schw | C | 6532 | 110 | 1 | 0.789229943133706 |   |
| MV_Schw | T | 6533 | 89  | 1 |                   | 1 |
| MV_Schw | C | 6534 | 143 | 1 | 0.88950624150852  |   |
| MV_Schw | C | 6535 | 165 | 3 |                   | 1 |
| MV_Schw | G | 6536 | 388 | 3 | 0.120050352121446 |   |
| MV_Schw | G | 6537 | 138 | 1 | 0.983694697749173 |   |
| MV_Schw | G | 6538 | 266 | 5 |                   | 1 |
| MV_Schw | G | 6539 | 64  | 1 |                   | 1 |
| MV_Schw | G | 6540 | 29  | 0 |                   | 1 |
| MV_Schw | T | 6541 | 10  | 0 |                   | 1 |
| MV_Schw | A | 6542 | 17  | 1 | 0.983041048229953 |   |
| MV_Schw | C | 6543 | 62  | 1 |                   | 1 |
| MV_Schw | A | 6544 | 35  | 0 |                   | 1 |
| MV_Schw | C | 6545 | 78  | 1 |                   | 1 |
| MV_Schw | C | 6546 | 126 | 2 |                   | 1 |
| MV_Schw | A | 6547 | 17  | 0 |                   | 1 |
| MV_Schw | A | 6548 | 47  | 0 |                   | 1 |
| MV_Schw | G | 6549 | 203 | 3 |                   | 1 |
| MV_Schw | T | 6550 | 68  | 2 |                   | 1 |

|         |   |      |     |   |                   |   |
|---------|---|------|-----|---|-------------------|---|
| MV_Schw | C | 6551 | 41  | 1 |                   | 1 |
| MV_Schw | C | 6552 | 43  | 1 |                   | 1 |
| MV_Schw | T | 6553 | 33  | 1 |                   | 1 |
| MV_Schw | G | 6554 | 236 | 2 | 0.638894311640422 |   |
| MV_Schw | T | 6555 | 68  | 1 |                   | 1 |
| MV_Schw | G | 6556 | 103 | 3 |                   | 1 |
| MV_Schw | C | 6557 | 231 | 6 | 0.987114400552037 |   |
| MV_Schw | T | 6558 | 8   | 0 |                   | 1 |
| MV_Schw | C | 6559 | 43  | 1 | 0.950262622850522 |   |
| MV_Schw | G | 6560 | 262 | 1 | 0.181354408412572 |   |
| MV_Schw | T | 6561 | 29  | 1 | 0.789229943133706 |   |
| MV_Schw | A | 6562 | 33  | 0 |                   | 1 |
| MV_Schw | C | 6563 | 60  | 1 |                   | 1 |
| MV_Schw | A | 6564 | 19  | 1 | 0.57780206681461  |   |
| MV_Schw | C | 6565 | 120 | 2 |                   | 1 |
| MV_Schw | T | 6566 | 2   | 0 |                   | 1 |
| MV_Schw | C | 6567 | 27  | 1 |                   | 1 |
| MV_Schw | G | 6568 | 50  | 1 |                   | 1 |
| MV_Schw | T | 6569 | 4   | 0 |                   | 1 |
| MV_Schw | A | 6570 | 37  | 0 |                   | 1 |
| MV_Schw | T | 6571 | 12  | 0 |                   | 1 |
| MV_Schw | C | 6572 | 25  | 0 |                   | 1 |
| MV_Schw | C | 6573 | 52  | 1 |                   | 1 |
| MV_Schw | G | 6574 | 78  | 3 | 0.863499923807603 |   |
| MV_Schw | G | 6575 | 258 | 5 |                   | 1 |
| MV_Schw | G | 6576 | 68  | 3 | 0.806176178462968 |   |
| MV_Schw | T | 6577 | 2   | 0 |                   | 1 |
| MV_Schw | C | 6578 | 41  | 1 |                   | 1 |
| MV_Schw | T | 6579 | 6   | 0 |                   | 1 |
| MV_Schw | T | 6580 | 8   | 1 | 0.789229943133706 |   |
| MV_Schw | T | 6581 | 33  | 1 | 0.822598489333375 |   |
| MV_Schw | T | 6582 | 68  | 0 | 0.789229943133706 |   |
| MV_Schw | G | 6583 | 41  | 0 |                   | 1 |
| MV_Schw | G | 6584 | 50  | 0 | 0.950262622850522 |   |
| MV_Schw | G | 6585 | 12  | 0 |                   | 1 |
| MV_Schw | A | 6586 | 21  | 1 |                   | 1 |



|         |   |      |     |   |                    |   |
|---------|---|------|-----|---|--------------------|---|
| MV_Schw | A | 6587 | 16  | 0 |                    | 1 |
| MV_Schw | C | 6588 | 25  | 1 | 0.704667204683568  |   |
| MV_Schw | C | 6589 | 12  | 2 | 0.0975104748468945 |   |
| MV_Schw | G | 6590 | 19  | 1 |                    | 1 |
| MV_Schw | G | 6591 | 203 | 6 | 0.847726296025822  |   |
| MV_Schw | T | 6592 | 29  | 0 |                    | 1 |
| MV_Schw | T | 6593 | 29  | 1 |                    | 1 |
| MV_Schw | C | 6594 | 149 | 5 | 0.892314320616093  |   |
| MV_Schw | A | 6595 | 66  | 1 |                    | 1 |
| MV_Schw | T | 6596 | 19  | 1 |                    | 1 |
| MV_Schw | T | 6597 | 60  | 3 | 0.550155392537109  |   |
| MV_Schw | T | 6598 | 31  | 1 |                    | 1 |
| MV_Schw | T | 6599 | 27  | 1 |                    | 1 |
| MV_Schw | A | 6600 | 14  | 1 | 0.426789350155389  |   |
| MV_Schw | T | 6601 | 54  | 1 |                    | 1 |
| MV_Schw | C | 6602 | 256 | 3 |                    | 1 |
| MV_Schw | A | 6603 | 8   | 0 |                    | 1 |
| MV_Schw | C | 6604 | 23  | 1 | 0.658415249679101  |   |
| MV_Schw | A | 6605 | 10  | 1 | 0.822598489333375  |   |
| MV_Schw | A | 6606 | 79  | 1 |                    | 1 |
| MV_Schw | G | 6607 | 83  | 2 |                    | 1 |
| MV_Schw | G | 6608 | 60  | 2 | 0.983041048229953  |   |
| MV_Schw | G | 6609 | 35  | 0 |                    | 1 |
| MV_Schw | A | 6610 | 8   | 0 |                    | 1 |
| MV_Schw | A | 6611 | 17  | 1 | 0.983041048229953  |   |
| MV_Schw | C | 6612 | 83  | 5 | 0.161503851613234  |   |
| MV_Schw | C | 6613 | 176 | 3 |                    | 1 |
| MV_Schw | T | 6614 | 29  | 1 |                    | 1 |
| MV_Schw | A | 6615 | 10  | 1 | 0.307480793677112  |   |
| MV_Schw | A | 6616 | 35  | 1 | 0.863499923807603  |   |
| MV_Schw | T | 6617 | 47  | 1 |                    | 1 |
| MV_Schw | A | 6618 | 169 | 3 |                    | 1 |
| MV_Schw | G | 6619 | 362 | 9 | 0.983694697749173  |   |
| MV_Schw | C | 6620 | 14  | 0 |                    | 1 |
| MV_Schw | C | 6621 | 145 | 2 |                    | 1 |
| MV_Schw | A | 6622 | 54  | 0 | 0.950262622850522  |   |

|         |    |      |     |   |                      |    |
|---------|----|------|-----|---|----------------------|----|
| MV_Schw | A  | 6623 | 25  | 0 |                      | 1  |
| MV_Schw | T  | 6624 | 31  | 0 |                      | 1  |
| MV_Schw | T  | 6625 | 37  | 0 |                      | 1  |
| MV_Schw | G  | 6626 | 54  | 1 |                      | 1  |
| MV_Schw | T  | 6627 | 14  | 1 | 0.426789350155389    |    |
| MV_Schw | G  | 6628 | 16  | 1 | 0.950262622850522    |    |
| MV_Schw | C  | 6629 | 328 | 2 | 0.149304739712522    |    |
| MV_Schw | A  | 6630 | 39  | 1 |                      | 1  |
| MV_Schw | T  | 6631 | 16  | 0 |                      | 1  |
| MV_Schw | C  | 6632 | 72  | 1 |                      | 1  |
| MV_Schw | A  | 6633 | 8   | 0 |                      | 1  |
| MV_Schw | A  | 6634 | 68  | 3 | 0.806176178462968    |    |
| MV_Schw | T  | 6635 | 12  | 0 |                      | 1  |
| MV_Schw | C  | 6636 | 70  | 1 |                      | 1  |
| MV_Schw | C  | 6637 | 91  | 2 |                      | 1  |
| MV_Schw | T  | 6638 | 25  | 0 |                      | 1  |
| MV_Schw | T  | 6639 | 19  | 0 |                      | 1  |
| MV_Schw | T  | 6640 | 91  | 1 |                      | 1  |
| MV_Schw | G  | 6641 | 74  | 1 |                      | 1  |
| MV_Schw | C  | 6642 | 45  | 0 |                      | 1  |
| MV_Schw | A  | 6643 | 2   | 0 |                      | 1  |
| MV_Schw | A  | 6644 | 14  | 1 | 0.944879389258477    |    |
| MV_Schw | G  | 6645 | 48  | 1 |                      | 1  |
| MV_Schw | T  | 6646 | 2   | 0 |                      | 1  |
| MV_Schw | G  | 6647 | 87  | 1 |                      | 1  |
| MV_Schw | NA | 6648 | 0   | 0 |                      | NA |
| MV_Schw | T  | 6649 | 27  | 1 |                      | 1  |
| MV_Schw | A  | 6650 | 8   | 0 |                      | 1  |
| MV_Schw | C  | 6651 | 72  | 7 | 0.000897521622018482 |    |
| MV_Schw | A  | 6652 | 6   | 0 |                      | 1  |
| MV_Schw | C  | 6653 | 48  | 1 |                      | 1  |
| MV_Schw | A  | 6654 | 4   | 1 | 0.619556855087002    |    |
| MV_Schw | A  | 6655 | 2   | 0 |                      | 1  |
| MV_Schw | C  | 6656 | 124 | 3 |                      | 1  |
| MV_Schw | A  | 6657 | 0   | 0 |                      | 1  |
| MV_Schw | G  | 6658 | 95  | 2 |                      | 1  |

|         |   |      |     |   |                    |
|---------|---|------|-----|---|--------------------|
| MV_Schw | G | 6659 | 66  | 0 | 0.789229943133706  |
| MV_Schw | A | 6660 | 21  | 0 | 1                  |
| MV_Schw | A | 6661 | 31  | 1 | 1                  |
| MV_Schw | C | 6662 | 128 | 1 | 1                  |
| MV_Schw | G | 6663 | 109 | 1 | 1                  |
| MV_Schw | A | 6664 | 23  | 1 | 1                  |
| MV_Schw | T | 6665 | 39  | 0 | 1                  |
| MV_Schw | C | 6666 | 345 | 8 | 1                  |
| MV_Schw | A | 6667 | 66  | 0 | 0.789229943133706  |
| MV_Schw | T | 6668 | 21  | 1 | 0.632968068765344  |
| MV_Schw | T | 6669 | 23  | 1 | 1                  |
| MV_Schw | A | 6670 | 81  | 1 | 1                  |
| MV_Schw | A | 6671 | 21  | 1 | 1                  |
| MV_Schw | T | 6672 | 95  | 2 | 1                  |
| MV_Schw | C | 6673 | 262 | 1 | 0.181354408412572  |
| MV_Schw | A | 6674 | 81  | 1 | 1                  |
| MV_Schw | A | 6675 | 8   | 1 | 0.258627633593378  |
| MV_Schw | G | 6676 | 229 | 5 | 1                  |
| MV_Schw | A | 6677 | 23  | 0 | 1                  |
| MV_Schw | C | 6678 | 83  | 1 | 1                  |
| MV_Schw | C | 6679 | 31  | 1 | 1                  |
| MV_Schw | C | 6680 | 37  | 0 | 1                  |
| MV_Schw | T | 6681 | 178 | 3 | 1                  |
| MV_Schw | G | 6682 | 112 | 1 | 0.789229943133706  |
| MV_Schw | A | 6683 | 95  | 1 | 1                  |
| MV_Schw | C | 6684 | 707 | 5 | 0.0177092936390313 |
| MV_Schw | A | 6685 | 60  | 1 | 1                  |
| MV_Schw | A | 6686 | 19  | 0 | 1                  |
| MV_Schw | G | 6687 | 76  | 4 | 0.256701313538806  |
| MV_Schw | A | 6688 | 25  | 1 | 1                  |
| MV_Schw | T | 6689 | 120 | 1 | 0.789229943133706  |
| MV_Schw | C | 6690 | 41  | 1 | 1                  |
| MV_Schw | C | 6691 | 141 | 1 | 0.989441011726102  |
| MV_Schw | T | 6692 | 4   | 0 | 1                  |
| MV_Schw | A | 6693 | 29  | 1 | 1                  |
| MV_Schw | A | 6694 | 48  | 3 | 0.390345857720356  |

|         |   |      |     |   |                   |   |
|---------|---|------|-----|---|-------------------|---|
| MV_Schw | C | 6695 | 54  | 1 |                   | 1 |
| MV_Schw | A | 6696 | 14  | 0 |                   | 1 |
| MV_Schw | T | 6697 | 6   | 0 |                   | 1 |
| MV_Schw | A | 6698 | 4   | 0 |                   | 1 |
| MV_Schw | C | 6699 | 21  | 0 |                   | 1 |
| MV_Schw | A | 6700 | 21  | 0 |                   | 1 |
| MV_Schw | T | 6701 | 14  | 0 |                   | 1 |
| MV_Schw | T | 6702 | 4   | 0 |                   | 1 |
| MV_Schw | G | 6703 | 21  | 0 |                   | 1 |
| MV_Schw | C | 6704 | 76  | 0 | 0.638894311640422 |   |
| MV_Schw | T | 6705 | 41  | 0 |                   | 1 |
| MV_Schw | G | 6706 | 298 | 3 | 0.506554058853276 |   |
| MV_Schw | C | 6707 | 72  | 1 |                   | 1 |
| MV_Schw | C | 6708 | 33  | 1 |                   | 1 |
| MV_Schw | G | 6709 | 151 | 3 |                   | 1 |
| MV_Schw | A | 6710 | 17  | 1 | 0.983041048229953 |   |
| MV_Schw | T | 6711 | 19  | 0 |                   | 1 |
| MV_Schw | C | 6712 | 23  | 0 |                   | 1 |
| MV_Schw | A | 6713 | 14  | 1 | 0.944879389258477 |   |
| MV_Schw | C | 6714 | 85  | 2 |                   | 1 |
| MV_Schw | T | 6715 | 8   | 0 |                   | 1 |
| MV_Schw | G | 6716 | 114 | 5 | 0.463720798159947 |   |
| MV_Schw | C | 6717 | 33  | 1 |                   | 1 |
| MV_Schw | C | 6718 | 58  | 2 | 0.98139756833885  |   |
| MV_Schw | C | 6719 | 252 | 7 | 0.791667533131283 |   |
| MV_Schw | G | 6720 | 78  | 0 | 0.638894311640422 |   |
| MV_Schw | G | 6721 | 25  | 1 |                   | 1 |
| MV_Schw | T | 6722 | 10  | 0 |                   | 1 |
| MV_Schw | A | 6723 | 4   | 0 |                   | 1 |
| MV_Schw | G | 6724 | 244 | 3 | 0.789229943133706 |   |
| MV_Schw | T | 6725 | 31  | 0 |                   | 1 |
| MV_Schw | C | 6726 | 39  | 0 |                   | 1 |
| MV_Schw | G | 6727 | 130 | 2 |                   | 1 |
| MV_Schw | A | 6728 | 12  | 0 |                   | 1 |
| MV_Schw | G | 6729 | 209 | 2 | 0.734151152837751 |   |
| MV_Schw | G | 6730 | 31  | 1 |                   | 1 |

|         |   |      |     |    |                   |   |
|---------|---|------|-----|----|-------------------|---|
| MV_Schw | T | 6731 | 33  | 0  |                   | 1 |
| MV_Schw | G | 6732 | 17  | 0  |                   | 1 |
| MV_Schw | A | 6733 | 23  | 1  |                   | 1 |
| MV_Schw | A | 6734 | 54  | 1  |                   | 1 |
| MV_Schw | C | 6735 | 68  | 2  |                   | 1 |
| MV_Schw | G | 6736 | 138 | 1  | 0.673422966374487 |   |
| MV_Schw | G | 6737 | 37  | 2  | 0.528591092326266 |   |
| MV_Schw | C | 6738 | 227 | 5  |                   | 1 |
| MV_Schw | G | 6739 | 238 | 7  | 0.909523240599174 |   |
| MV_Schw | T | 6740 | 287 | 11 | 0.129671060641067 |   |
| MV_Schw | G | 6741 | 97  | 5  | 0.259232568936535 |   |
| MV_Schw | A | 6742 | 17  | 0  |                   | 1 |
| MV_Schw | C | 6743 | 43  | 1  |                   | 1 |
| MV_Schw | C | 6744 | 29  | 1  | 0.789229943133706 |   |
| MV_Schw | A | 6745 | 35  | 0  |                   | 1 |
| MV_Schw | T | 6746 | 58  | 0  | 0.953489044526869 |   |
| MV_Schw | C | 6747 | 37  | 1  | 0.88950624150852  |   |
| MV_Schw | C | 6748 | 45  | 2  | 0.65158773158174  |   |
| MV_Schw | A | 6749 | 29  | 1  | 0.789229943133706 |   |
| MV_Schw | A | 6750 | 6   | 0  |                   | 1 |
| MV_Schw | G | 6751 | 316 | 7  |                   | 1 |
| MV_Schw | T | 6752 | 27  | 0  |                   | 1 |
| MV_Schw | C | 6753 | 72  | 1  |                   | 1 |
| MV_Schw | G | 6754 | 62  | 1  |                   | 1 |
| MV_Schw | G | 6755 | 194 | 7  | 0.333677714503605 |   |
| MV_Schw | G | 6756 | 136 | 5  | 0.413972023083745 |   |
| MV_Schw | A | 6757 | 19  | 1  |                   | 1 |
| MV_Schw | G | 6758 | 176 | 3  |                   | 1 |
| MV_Schw | C | 6759 | 79  | 1  |                   | 1 |
| MV_Schw | A | 6760 | 27  | 1  | 0.752394317790241 |   |
| MV_Schw | G | 6761 | 227 | 3  | 0.88950624150852  |   |
| MV_Schw | G | 6762 | 167 | 1  | 0.788293646497135 |   |
| MV_Schw | A | 6763 | 29  | 1  |                   | 1 |
| MV_Schw | G | 6764 | 147 | 7  | 0.207688569171937 |   |
| MV_Schw | G | 6765 | 33  | 1  | 0.822598489333375 |   |
| MV_Schw | T | 6766 | 33  | 2  | 0.463720798159947 |   |

|         |   |      |     |    |                    |
|---------|---|------|-----|----|--------------------|
| MV_Schw | A | 6767 | 62  | 0  | 0.789229943133706  |
| MV_Schw | T | 6768 | 174 | 3  | 1                  |
| MV_Schw | C | 6769 | 217 | 6  | 0.969676682971856  |
| MV_Schw | C | 6770 | 297 | 5  | 1                  |
| MV_Schw | A | 6771 | 147 | 1  | 0.88950624150852   |
| MV_Schw | G | 6772 | 281 | 7  | 1                  |
| MV_Schw | A | 6773 | 167 | 4  | 1                  |
| MV_Schw | C | 6774 | 99  | 5  | 0.277229700444564  |
| MV_Schw | G | 6775 | 167 | 4  | 1                  |
| MV_Schw | C | 6776 | 54  | 0  | 0.950262622850522  |
| MV_Schw | T | 6777 | 81  | 1  | 1                  |
| MV_Schw | G | 6778 | 74  | 2  | 1                  |
| MV_Schw | T | 6779 | 70  | 3  | 0.819327818667335  |
| MV_Schw | G | 6780 | 76  | 1  | 1                  |
| MV_Schw | T | 6781 | 25  | 0  | 1                  |
| MV_Schw | A | 6782 | 8   | 0  | 1                  |
| MV_Schw | C | 6783 | 227 | 12 | 0.0122277142979422 |
| MV_Schw | T | 6784 | 4   | 1  | 0.619556855087002  |
| MV_Schw | T | 6785 | 8   | 0  | 1                  |
| MV_Schw | G | 6786 | 128 | 1  | 0.658415249679101  |
| MV_Schw | C | 6787 | 68  | 1  | 1                  |
| MV_Schw | A | 6788 | 174 | 5  | 1                  |
| MV_Schw | C | 6789 | 109 | 4  | 0.632968068765344  |
| MV_Schw | A | 6790 | 17  | 0  | 1                  |
| MV_Schw | G | 6791 | 37  | 1  | 0.88950624150852   |
| MV_Schw | A | 6792 | 47  | 1  | 1                  |
| MV_Schw | A | 6793 | 39  | 0  | 1                  |
| MV_Schw | T | 6794 | 149 | 1  | 0.550155392537109  |
| MV_Schw | T | 6795 | 16  | 1  | 0.950262622850522  |
| MV_Schw | G | 6796 | 79  | 0  | 0.639207655977387  |
| MV_Schw | A | 6797 | 4   | 0  | 1                  |
| MV_Schw | C | 6798 | 343 | 1  | 0.0340037011728573 |
| MV_Schw | C | 6799 | 114 | 3  | 1                  |
| MV_Schw | T | 6800 | 19  | 2  | 0.224063006917908  |
| MV_Schw | C | 6801 | 43  | 1  | 0.950262622850522  |
| MV_Schw | G | 6802 | 74  | 0  | 0.795198078226602  |

|         |    |      |     |   |                   |
|---------|----|------|-----|---|-------------------|
| MV_Schw | G  | 6803 | 273 | 1 | 0.139259883257776 |
| MV_Schw | T  | 6804 | 45  | 1 | 1                 |
| MV_Schw | C  | 6805 | 10  | 0 | 1                 |
| MV_Schw | C  | 6806 | 39  | 1 | 0.9314909603024   |
| MV_Schw | T  | 6807 | 6   | 0 | 1                 |
| MV_Schw | C  | 6808 | 21  | 0 | 1                 |
| MV_Schw | C  | 6809 | 87  | 2 | 1                 |
| MV_Schw | C  | 6810 | 14  | 1 | 0.944879389258477 |
| MV_Schw | A  | 6811 | 4   | 0 | 1                 |
| MV_Schw | T  | 6812 | 6   | 0 | 1                 |
| MV_Schw | A  | 6813 | 6   | 0 | 1                 |
| MV_Schw | NA | 6814 | 0   | 0 | NA                |
| MV_Schw | C  | 6815 | 4   | 0 | 1                 |
| MV_Schw | A  | 6816 | 10  | 1 | 0.307480793677112 |
| MV_Schw | T  | 6817 | 4   | 1 | 0.619556855087002 |
| MV_Schw | T  | 6818 | 25  | 0 | 1                 |
| MV_Schw | G  | 6819 | 31  | 0 | 1                 |
| MV_Schw | G  | 6820 | 39  | 0 | 1                 |
| MV_Schw | A  | 6821 | 19  | 0 | 1                 |
| MV_Schw | G  | 6822 | 50  | 0 | 0.950262622850522 |
| MV_Schw | A  | 6823 | 4   | 0 | 1                 |
| MV_Schw | G  | 6824 | 16  | 0 | 1                 |
| MV_Schw | G  | 6825 | 130 | 4 | 0.854189367256496 |
| MV_Schw | T  | 6826 | 10  | 0 | 1                 |
| MV_Schw | T  | 6827 | 64  | 2 | 1                 |
| MV_Schw | G  | 6828 | 29  | 0 | 1                 |
| MV_Schw | G  | 6829 | 52  | 3 | 0.445919862395878 |
| MV_Schw | A  | 6830 | 21  | 0 | 1                 |
| MV_Schw | C  | 6831 | 161 | 5 | 0.646149988917053 |
| MV_Schw | G  | 6832 | 58  | 2 | 0.98139756833885  |
| MV_Schw | T  | 6833 | 14  | 1 | 0.426789350155389 |
| MV_Schw | A  | 6834 | 12  | 0 | 1                 |
| MV_Schw | G  | 6835 | 50  | 1 | 1                 |
| MV_Schw | G  | 6836 | 172 | 5 | 0.789229943133706 |
| MV_Schw | G  | 6837 | 293 | 7 | 1                 |
| MV_Schw | A  | 6838 | 8   | 1 | 0.258627633593378 |

|         |   |      |     |    |                    |   |
|---------|---|------|-----|----|--------------------|---|
| MV_Schw | C | 6839 | 169 | 3  |                    | 1 |
| MV_Schw | A | 6840 | 23  | 0  |                    | 1 |
| MV_Schw | A | 6841 | 25  | 0  |                    | 1 |
| MV_Schw | A | 6842 | 110 | 4  | 0.639207655977387  |   |
| MV_Schw | T | 6843 | 68  | 1  |                    | 1 |
| MV_Schw | C | 6844 | 182 | 2  | 0.946416176064202  |   |
| MV_Schw | T | 6845 | 47  | 1  |                    | 1 |
| MV_Schw | G | 6846 | 866 | 25 | 0.380612952834776  |   |
| MV_Schw | G | 6847 | 83  | 1  |                    | 1 |
| MV_Schw | G | 6848 | 132 | 3  |                    | 1 |
| MV_Schw | G | 6849 | 23  | 1  | 0.658415249679101  |   |
| MV_Schw | A | 6850 | 12  | 0  |                    | 1 |
| MV_Schw | A | 6851 | 27  | 1  |                    | 1 |
| MV_Schw | T | 6852 | 72  | 1  |                    | 1 |
| MV_Schw | G | 6853 | 254 | 7  |                    | 1 |
| MV_Schw | C | 6854 | 227 | 7  | 0.645428736569362  |   |
| MV_Schw | A | 6855 | 45  | 1  |                    | 1 |
| MV_Schw | A | 6856 | 17  | 3  | 0.0469760201915419 |   |
| MV_Schw | T | 6857 | 48  | 5  | 0.0200563728790100 |   |
| MV_Schw | T | 6858 | 31  | 1  | 0.791667533131283  |   |
| MV_Schw | G | 6859 | 161 | 1  | 0.78470776546672   |   |
| MV_Schw | C | 6860 | 174 | 3  |                    | 1 |
| MV_Schw | T | 6861 | 14  | 1  | 0.944879389258477  |   |
| MV_Schw | A | 6862 | 31  | 1  |                    | 1 |
| MV_Schw | A | 6863 | 2   | 0  |                    | 1 |
| MV_Schw | G | 6864 | 101 | 3  | 0.789229943133706  |   |
| MV_Schw | T | 6865 | 35  | 0  |                    | 1 |
| MV_Schw | T | 6866 | 31  | 1  | 0.791667533131283  |   |
| MV_Schw | G | 6867 | 89  | 3  | 0.715462436038866  |   |
| MV_Schw | G | 6868 | 48  | 0  | 0.950262622850522  |   |
| MV_Schw | A | 6869 | 35  | 2  | 0.497615650989996  |   |
| MV_Schw | G | 6870 | 198 | 7  | 0.350814957308642  |   |
| MV_Schw | G | 6871 | 8   | 0  |                    | 1 |
| MV_Schw | A | 6872 | 23  | 0  |                    | 1 |
| MV_Schw | T | 6873 | 12  | 1  | 0.88950624150852   |   |
| MV_Schw | G | 6874 | 43  | 1  |                    | 1 |



|         |   |      |     |    |                   |   |
|---------|---|------|-----|----|-------------------|---|
| MV_Schw | C | 6875 | 118 | 2  |                   | 1 |
| MV_Schw | C | 6876 | 79  | 3  | 0.882548734849042 |   |
| MV_Schw | A | 6877 | 72  | 4  | 0.222002676269896 |   |
| MV_Schw | A | 6878 | 165 | 3  |                   | 1 |
| MV_Schw | G | 6879 | 141 | 4  |                   | 1 |
| MV_Schw | G | 6880 | 178 | 7  | 0.403516190901706 |   |
| MV_Schw | A | 6881 | 45  | 1  |                   | 1 |
| MV_Schw | A | 6882 | 37  | 1  | 0.88950624150852  |   |
| MV_Schw | T | 6883 | 37  | 0  |                   | 1 |
| MV_Schw | T | 6884 | 74  | 0  | 0.795198078226602 |   |
| MV_Schw | G | 6885 | 543 | 13 |                   | 1 |
| MV_Schw | T | 6886 | 47  | 0  |                   | 1 |
| MV_Schw | T | 6887 | 95  | 2  |                   | 1 |
| MV_Schw | G | 6888 | 279 | 7  |                   | 1 |
| MV_Schw | G | 6889 | 93  | 0  | 0.498091317793217 |   |
| MV_Schw | A | 6890 | 21  | 0  |                   | 1 |
| MV_Schw | G | 6891 | 99  | 4  | 0.560243889454362 |   |
| MV_Schw | T | 6892 | 8   | 0  |                   | 1 |
| MV_Schw | C | 6893 | 95  | 1  |                   | 1 |
| MV_Schw | A | 6894 | 176 | 3  |                   | 1 |
| MV_Schw | T | 6895 | 159 | 3  |                   | 1 |
| MV_Schw | C | 6896 | 233 | 9  | 0.307480793677112 |   |
| MV_Schw | G | 6897 | 149 | 5  | 0.892314320616093 |   |
| MV_Schw | G | 6898 | 161 | 4  |                   | 1 |
| MV_Schw | A | 6899 | 89  | 2  |                   | 1 |
| MV_Schw | C | 6900 | 202 | 4  |                   | 1 |
| MV_Schw | C | 6901 | 649 | 15 |                   | 1 |
| MV_Schw | A | 6902 | 17  | 2  | 0.190596323698557 |   |
| MV_Schw | G | 6903 | 23  | 2  | 0.296710762771661 |   |
| MV_Schw | A | 6904 | 27  | 0  |                   | 1 |
| MV_Schw | T | 6905 | 58  | 2  | 0.98139756833885  |   |
| MV_Schw | A | 6906 | 41  | 0  |                   | 1 |
| MV_Schw | T | 6907 | 54  | 1  |                   | 1 |
| MV_Schw | T | 6908 | 62  | 2  | 0.991517221373143 |   |
| MV_Schw | G | 6909 | 112 | 4  | 0.648224297390367 |   |
| MV_Schw | A | 6910 | 79  | 3  | 0.882548734849042 |   |

|         |   |      |     |    |                   |
|---------|---|------|-----|----|-------------------|
| MV_Schw | G | 6911 | 432 | 11 | 0.88950624150852  |
| MV_Schw | G | 6912 | 72  | 1  | 1                 |
| MV_Schw | A | 6913 | 8   | 0  | 1                 |
| MV_Schw | G | 6914 | 41  | 1  | 0.945767847051808 |
| MV_Schw | T | 6915 | 10  | 1  | 0.307480793677112 |
| MV_Schw | A | 6916 | 27  | 0  | 1                 |
| MV_Schw | T | 6917 | 29  | 0  | 1                 |
| MV_Schw | G | 6918 | 502 | 13 | 0.944879389258477 |
| MV_Schw | A | 6919 | 58  | 1  | 1                 |
| MV_Schw | A | 6920 | 27  | 1  | 0.752394317790241 |
| MV_Schw | A | 6921 | 25  | 1  | 1                 |
| MV_Schw | G | 6922 | 510 | 17 | 0.252703073422297 |
| MV_Schw | G | 6923 | 116 | 5  | 0.479133435065576 |
| MV_Schw | T | 6924 | 17  | 0  | 1                 |
| MV_Schw | T | 6925 | 45  | 1  | 1                 |
| MV_Schw | T | 6926 | 62  | 0  | 0.789229943133706 |
| MV_Schw | A | 6927 | 120 | 2  | 1                 |
| MV_Schw | T | 6928 | 76  | 1  | 1                 |
| MV_Schw | C | 6929 | 395 | 11 | 0.844774346689763 |
| MV_Schw | G | 6930 | 134 | 3  | 1                 |
| MV_Schw | A | 6931 | 27  | 0  | 1                 |
| MV_Schw | G | 6932 | 107 | 3  | 0.950262622850522 |
| MV_Schw | C | 6933 | 161 | 7  | 0.158912472326488 |
| MV_Schw | A | 6934 | 17  | 1  | 0.983041048229953 |
| MV_Schw | C | 6935 | 110 | 2  | 1                 |
| MV_Schw | T | 6936 | 10  | 0  | 1                 |
| MV_Schw | A | 6937 | 48  | 1  | 1                 |
| MV_Schw | G | 6938 | 192 | 5  | 1                 |
| MV_Schw | C | 6939 | 47  | 1  | 1                 |
| MV_Schw | A | 6940 | 64  | 1  | 1                 |
| MV_Schw | T | 6941 | 8   | 0  | 1                 |
| MV_Schw | A | 6942 | 31  | 1  | 1                 |
| MV_Schw | G | 6943 | 109 | 3  | 1                 |
| MV_Schw | T | 6944 | 112 | 2  | 1                 |
| MV_Schw | C | 6945 | 64  | 1  | 1                 |
| MV_Schw | T | 6946 | 35  | 0  | 1                 |

|         |   |      |     |   |                   |   |
|---------|---|------|-----|---|-------------------|---|
| MV_Schw | A | 6947 | 4   | 0 |                   | 1 |
| MV_Schw | C | 6948 | 76  | 1 |                   | 1 |
| MV_Schw | A | 6949 | 31  | 0 |                   | 1 |
| MV_Schw | T | 6950 | 29  | 0 |                   | 1 |
| MV_Schw | C | 6951 | 157 | 2 |                   | 1 |
| MV_Schw | C | 6952 | 35  | 1 |                   | 1 |
| MV_Schw | T | 6953 | 45  | 0 |                   | 1 |
| MV_Schw | G | 6954 | 60  | 1 |                   | 1 |
| MV_Schw | A | 6955 | 72  | 1 |                   | 1 |
| MV_Schw | T | 6956 | 89  | 1 |                   | 1 |
| MV_Schw | T | 6957 | 25  | 0 |                   | 1 |
| MV_Schw | G | 6958 | 39  | 0 |                   | 1 |
| MV_Schw | C | 6959 | 12  | 0 |                   | 1 |
| MV_Schw | A | 6960 | 27  | 1 |                   | 1 |
| MV_Schw | G | 6961 | 260 | 9 | 0.366637777073510 |   |
| MV_Schw | T | 6962 | 17  | 1 | 0.983041048229953 |   |
| MV_Schw | G | 6963 | 27  | 1 | 0.752394317790241 |   |
| MV_Schw | T | 6964 | 4   | 0 |                   | 1 |
| MV_Schw | G | 6965 | 91  | 3 | 0.734151152837751 |   |
| MV_Schw | T | 6966 | 33  | 1 |                   | 1 |
| MV_Schw | C | 6967 | 95  | 1 |                   | 1 |
| MV_Schw | T | 6968 | 68  | 3 | 0.806176178462968 |   |
| MV_Schw | T | 6969 | 132 | 3 |                   | 1 |
| MV_Schw | G | 6970 | 91  | 1 |                   | 1 |
| MV_Schw | G | 6971 | 279 | 7 |                   | 1 |
| MV_Schw | A | 6972 | 17  | 1 | 0.983041048229953 |   |
| MV_Schw | G | 6973 | 132 | 5 | 0.694842282240476 |   |
| MV_Schw | G | 6974 | 99  | 2 |                   | 1 |
| MV_Schw | G | 6975 | 118 | 4 | 0.804012640024926 |   |
| MV_Schw | T | 6976 | 19  | 1 |                   | 1 |
| MV_Schw | T | 6977 | 17  | 0 |                   | 1 |
| MV_Schw | G | 6978 | 376 | 7 |                   | 1 |
| MV_Schw | A | 6979 | 31  | 1 |                   | 1 |
| MV_Schw | T | 6980 | 281 | 5 |                   | 1 |
| MV_Schw | A | 6981 | 192 | 5 | 0.950262622850522 |   |
| MV_Schw | G | 6982 | 234 | 3 |                   | 1 |

|         |   |      |     |    |                    |   |
|---------|---|------|-----|----|--------------------|---|
| MV_Schw | G | 6983 | 52  | 1  |                    | 1 |
| MV_Schw | G | 6984 | 66  | 1  |                    | 1 |
| MV_Schw | A | 6985 | 85  | 3  | 0.918952129071198  |   |
| MV_Schw | T | 6986 | 33  | 1  |                    | 1 |
| MV_Schw | C | 6987 | 172 | 1  | 0.789229943133706  |   |
| MV_Schw | C | 6988 | 85  | 1  |                    | 1 |
| MV_Schw | C | 6989 | 159 | 1  | 0.78470776546672   |   |
| MV_Schw | C | 6990 | 114 | 2  |                    | 1 |
| MV_Schw | G | 6991 | 453 | 6  | 0.715462436038866  |   |
| MV_Schw | C | 6992 | 202 | 4  |                    | 1 |
| MV_Schw | T | 6993 | 43  | 0  |                    | 1 |
| MV_Schw | T | 6994 | 12  | 0  |                    | 1 |
| MV_Schw | T | 6995 | 12  | 1  | 0.88950624150852   |   |
| MV_Schw | A | 6996 | 6   | 0  |                    | 1 |
| MV_Schw | A | 6997 | 14  | 0  |                    | 1 |
| MV_Schw | T | 6998 | 41  | 1  |                    | 1 |
| MV_Schw | A | 6999 | 4   | 1  | 0.619556855087002  |   |
| MV_Schw | T | 7000 | 23  | 0  |                    | 1 |
| MV_Schw | G | 7001 | 21  | 0  |                    | 1 |
| MV_Schw | T | 7002 | 12  | 0  |                    | 1 |
| MV_Schw | T | 7003 | 54  | 0  | 0.950262622850522  |   |
| MV_Schw | G | 7004 | 159 | 3  |                    | 1 |
| MV_Schw | C | 7005 | 240 | 5  |                    | 1 |
| MV_Schw | T | 7006 | 27  | 1  |                    | 1 |
| MV_Schw | G | 7007 | 450 | 14 | 0.381672248067152  |   |
| MV_Schw | C | 7008 | 54  | 1  |                    | 1 |
| MV_Schw | A | 7009 | 52  | 0  | 0.950262622850522  |   |
| MV_Schw | G | 7010 | 72  | 3  | 0.822598489333375  |   |
| MV_Schw | G | 7011 | 89  | 6  | 0.0358765704418588 |   |
| MV_Schw | G | 7012 | 248 | 5  |                    | 1 |
| MV_Schw | G | 7013 | 85  | 3  | 0.918952129071198  |   |
| MV_Schw | G | 7014 | 50  | 2  | 0.746970975838775  |   |
| MV_Schw | C | 7015 | 91  | 3  |                    | 1 |
| MV_Schw | G | 7016 | 488 | 11 |                    | 1 |
| MV_Schw | T | 7017 | 60  | 1  |                    | 1 |
| MV_Schw | T | 7018 | 31  | 1  |                    | 1 |

|         |   |      |     |    |                    |   |
|---------|---|------|-----|----|--------------------|---|
| MV_Schw | G | 7019 | 97  | 3  | 0.78354985902497   |   |
| MV_Schw | T | 7020 | 23  | 1  |                    | 1 |
| MV_Schw | A | 7021 | 16  | 1  | 0.483965165529824  |   |
| MV_Schw | A | 7022 | 72  | 3  | 0.822598489333375  |   |
| MV_Schw | C | 7023 | 626 | 11 |                    | 1 |
| MV_Schw | A | 7024 | 43  | 1  |                    | 1 |
| MV_Schw | A | 7025 | 72  | 4  | 0.222002676269896  |   |
| MV_Schw | A | 7026 | 39  | 2  | 0.560243889454362  |   |
| MV_Schw | A | 7027 | 184 | 5  |                    | 1 |
| MV_Schw | A | 7028 | 56  | 1  |                    | 1 |
| MV_Schw | G | 7029 | 393 | 14 | 0.197110025094196  |   |
| MV_Schw | G | 7030 | 136 | 3  |                    | 1 |
| MV_Schw | G | 7031 | 31  | 1  |                    | 1 |
| MV_Schw | A | 7032 | 43  | 0  |                    | 1 |
| MV_Schw | G | 7033 | 360 | 7  |                    | 1 |
| MV_Schw | A | 7034 | 81  | 3  | 0.88950624150852   |   |
| MV_Schw | A | 7035 | 29  | 3  | 0.0435098404838992 |   |
| MV_Schw | C | 7036 | 180 | 3  |                    | 1 |
| MV_Schw | A | 7037 | 14  | 0  |                    | 1 |
| MV_Schw | A | 7038 | 37  | 0  |                    | 1 |
| MV_Schw | G | 7039 | 248 | 7  | 0.939506000333287  |   |
| MV_Schw | T | 7040 | 74  | 1  |                    | 1 |
| MV_Schw | T | 7041 | 56  | 0  | 0.950262622850522  |   |
| MV_Schw | G | 7042 | 60  | 3  | 0.550155392537109  |   |
| MV_Schw | G | 7043 | 50  | 3  | 0.42458526175556   |   |
| MV_Schw | T | 7044 | 16  | 0  |                    | 1 |
| MV_Schw | A | 7045 | 12  | 0  |                    | 1 |
| MV_Schw | T | 7046 | 25  | 1  | 0.704667204683568  |   |
| MV_Schw | G | 7047 | 333 | 3  | 0.562679696554225  |   |
| MV_Schw | T | 7048 | 43  | 1  | 0.950262622850522  |   |
| MV_Schw | C | 7049 | 289 | 7  |                    | 1 |
| MV_Schw | A | 7050 | 45  | 0  |                    | 1 |
| MV_Schw | A | 7051 | 19  | 0  |                    | 1 |
| MV_Schw | G | 7052 | 79  | 1  |                    | 1 |
| MV_Schw | A | 7053 | 70  | 4  | 0.206412498777864  |   |
| MV_Schw | C | 7054 | 81  | 2  |                    | 1 |

|         |   |      |     |    |                    |
|---------|---|------|-----|----|--------------------|
| MV_Schw | C | 7055 | 151 | 5  | 0.60889328543512   |
| MV_Schw | A | 7056 | 8   | 0  | 1                  |
| MV_Schw | G | 7057 | 116 | 4  | 0.795434284511944  |
| MV_Schw | G | 7058 | 47  | 1  | 1                  |
| MV_Schw | C | 7059 | 54  | 4  | 0.094193442838711  |
| MV_Schw | C | 7060 | 25  | 2  | 0.314611398059001  |
| MV_Schw | T | 7061 | 25  | 0  | 1                  |
| MV_Schw | A | 7062 | 37  | 0  | 1                  |
| MV_Schw | A | 7063 | 6   | 0  | 1                  |
| MV_Schw | A | 7064 | 33  | 0  | 1                  |
| MV_Schw | G | 7065 | 221 | 1  | 0.356200658338914  |
| MV_Schw | C | 7066 | 47  | 1  | 1                  |
| MV_Schw | C | 7067 | 56  | 2  | 0.968890372475178  |
| MV_Schw | T | 7068 | 23  | 1  | 1                  |
| MV_Schw | G | 7069 | 99  | 2  | 1                  |
| MV_Schw | A | 7070 | 72  | 0  | 0.791667533131283  |
| MV_Schw | T | 7071 | 31  | 1  | 0.791667533131283  |
| MV_Schw | C | 7072 | 29  | 1  | 1                  |
| MV_Schw | T | 7073 | 8   | 0  | 1                  |
| MV_Schw | T | 7074 | 56  | 1  | 1                  |
| MV_Schw | A | 7075 | 39  | 1  | 0.9314909603024    |
| MV_Schw | C | 7076 | 421 | 12 | 0.694191831923892  |
| MV_Schw | G | 7077 | 99  | 1  | 0.944879389258477  |
| MV_Schw | G | 7078 | 494 | 6  | 0.567337219713728  |
| MV_Schw | G | 7079 | 12  | 1  | 0.88950624150852   |
| MV_Schw | A | 7080 | 2   | 1  | 0.0802641948298692 |
| MV_Schw | A | 7081 | 10  | 1  | 0.822598489333375  |
| MV_Schw | C | 7082 | 27  | 1  | 1                  |
| MV_Schw | A | 7083 | 8   | 1  | 0.789229943133706  |
| MV_Schw | T | 7084 | 74  | 1  | 1                  |
| MV_Schw | C | 7085 | 112 | 4  | 0.648224297390367  |
| MV_Schw | A | 7086 | 23  | 1  | 1                  |
| MV_Schw | A | 7087 | 2   | 1  | 0.491835918445353  |
| MV_Schw | A | 7088 | 0   | 1  | 0.307480793677112  |
| MV_Schw | A | 7089 | 45  | 1  | 1                  |
| MV_Schw | T | 7090 | 17  | 0  | 1                  |

|         |    |      |     |   |                     |    |
|---------|----|------|-----|---|---------------------|----|
| MV_Schw | C  | 7091 | 33  | 0 |                     | 1  |
| MV_Schw | C  | 7092 | 37  | 1 |                     | 1  |
| MV_Schw | T  | 7093 | 8   | 0 |                     | 1  |
| MV_Schw | A  | 7094 | 39  | 0 |                     | 1  |
| MV_Schw | T  | 7095 | 45  | 0 |                     | 1  |
| MV_Schw | G  | 7096 | 56  | 1 |                     | 1  |
| MV_Schw | T  | 7097 | 8   | 0 |                     | 1  |
| MV_Schw | A  | 7098 | 0   | 1 | 0.307480793677112   |    |
| MV_Schw | A  | 7099 | 4   | 0 |                     | 1  |
| MV_Schw | G  | 7100 | 114 | 2 |                     | 1  |
| MV_Schw | G  | 7101 | 128 | 1 | 0.658415249679101   |    |
| MV_Schw | T  | 7102 | 21  | 0 |                     | 1  |
| MV_Schw | C  | 7103 | 37  | 0 |                     | 1  |
| MV_Schw | G  | 7104 | 91  | 1 |                     | 1  |
| MV_Schw | C  | 7105 | 422 | 7 |                     | 1  |
| MV_Schw | T  | 7106 | 182 | 2 | 0.946416176064202   |    |
| MV_Schw | C  | 7107 | 382 | 1 | 0.00375124519292723 |    |
| MV_Schw | T  | 7108 | 47  | 2 | 0.678058690427187   |    |
| MV_Schw | G  | 7109 | 39  | 1 | 0.9314909603024     |    |
| MV_Schw | A  | 7110 | 50  | 3 | 0.199842243730937   |    |
| MV_Schw | T  | 7111 | 122 | 2 |                     | 1  |
| MV_Schw | C  | 7112 | 47  | 0 |                     | 1  |
| MV_Schw | C  | 7113 | 39  | 1 |                     | 1  |
| MV_Schw | T  | 7114 | 2   | 0 |                     | 1  |
| MV_Schw | C  | 7115 | 109 | 1 | 0.947544583923452   |    |
| MV_Schw | T  | 7116 | 33  | 3 | 0.197209929577240   |    |
| MV_Schw | A  | 7117 | 19  | 0 |                     | 1  |
| MV_Schw | C  | 7118 | 269 | 4 |                     | 1  |
| MV_Schw | A  | 7119 | 2   | 0 |                     | 1  |
| MV_Schw | NA | 7120 | 0   | 0 |                     | NA |
| MV_Schw | C  | 7121 | 31  | 0 |                     | 1  |
| MV_Schw | T  | 7122 | 12  | 0 |                     | 1  |
| MV_Schw | C  | 7123 | 54  | 2 | 0.789229943133706   |    |
| MV_Schw | T  | 7124 | 43  | 1 | 0.950262622850522   |    |
| MV_Schw | T  | 7125 | 16  | 1 | 0.950262622850522   |    |
| MV_Schw | G  | 7126 | 109 | 3 | 0.950262622850522   |    |

|         |   |      |     |   |                     |
|---------|---|------|-----|---|---------------------|
| MV_Schw | A | 7127 | 14  | 1 | 0.944879389258477   |
| MV_Schw | A | 7128 | 39  | 2 | 0.560243889454362   |
| MV_Schw | A | 7129 | 0   | 0 | 1                   |
| MV_Schw | C | 7130 | 107 | 2 | 1                   |
| MV_Schw | A | 7131 | 8   | 0 | 1                   |
| MV_Schw | C | 7132 | 47  | 1 | 1                   |
| MV_Schw | A | 7133 | 56  | 2 | 0.968890372475178   |
| MV_Schw | A | 7134 | 39  | 0 | 1                   |
| MV_Schw | A | 7135 | 47  | 1 | 1                   |
| MV_Schw | T | 7136 | 37  | 1 | 1                   |
| MV_Schw | G | 7137 | 39  | 1 | 0.9314909603024     |
| MV_Schw | T | 7138 | 8   | 0 | 1                   |
| MV_Schw | C | 7139 | 58  | 1 | 1                   |
| MV_Schw | C | 7140 | 324 | 7 | 1                   |
| MV_Schw | C | 7141 | 498 | 1 | 0.00101808195727547 |
| MV_Schw | A | 7142 | 31  | 1 | 1                   |
| MV_Schw | C | 7143 | 331 | 5 | 1                   |
| MV_Schw | A | 7144 | 19  | 0 | 1                   |
| MV_Schw | A | 7145 | 29  | 1 | 0.789229943133706   |
| MV_Schw | G | 7146 | 182 | 5 | 1                   |
| MV_Schw | T | 7147 | 14  | 0 | 1                   |
| MV_Schw | C | 7148 | 269 | 3 | 0.944879389258477   |
| MV_Schw | T | 7149 | 8   | 0 | 1                   |
| MV_Schw | C | 7150 | 107 | 2 | 1                   |
| MV_Schw | C | 7151 | 295 | 5 | 1                   |
| MV_Schw | T | 7152 | 25  | 1 | 0.704667204683568   |
| MV_Schw | C | 7153 | 143 | 0 | 0.161503851613234   |
| MV_Schw | T | 7154 | 76  | 1 | 1                   |
| MV_Schw | T | 7155 | 81  | 2 | 1                   |
| MV_Schw | C | 7156 | 223 | 7 | 0.788293646497135   |
| MV_Schw | G | 7157 | 452 | 6 | 0.715462436038866   |
| MV_Schw | T | 7158 | 27  | 0 | 1                   |
| MV_Schw | C | 7159 | 262 | 1 | 0.181354408412572   |
| MV_Schw | A | 7160 | 76  | 0 | 0.638894311640422   |
| MV_Schw | T | 7161 | 25  | 1 | 1                   |
| MV_Schw | C | 7162 | 180 | 0 | 0.090192830807046   |



|         |   |      |     |   |                    |   |
|---------|---|------|-----|---|--------------------|---|
| MV_Schw | A | 7163 | 83  | 1 |                    | 1 |
| MV_Schw | A | 7164 | 128 | 1 |                    | 1 |
| MV_Schw | G | 7165 | 60  | 1 |                    | 1 |
| MV_Schw | C | 7166 | 200 | 5 | 0.953489044526869  |   |
| MV_Schw | A | 7167 | 68  | 5 | 0.0767999036069378 |   |
| MV_Schw | A | 7168 | 0   | 0 |                    | 1 |
| MV_Schw | C | 7169 | 68  | 3 | 0.378469870290234  |   |
| MV_Schw | C | 7170 | 81  | 1 |                    | 1 |
| MV_Schw | A | 7171 | 35  | 1 | 0.863499923807603  |   |
| MV_Schw | C | 7172 | 188 | 5 |                    | 1 |
| MV_Schw | C | 7173 | 110 | 1 |                    | 1 |
| MV_Schw | G | 7174 | 68  | 1 |                    | 1 |
| MV_Schw | C | 7175 | 176 | 1 | 0.648224297390367  |   |
| MV_Schw | A | 7176 | 41  | 1 | 0.945767847051808  |   |
| MV_Schw | C | 7177 | 95  | 3 |                    | 1 |
| MV_Schw | C | 7178 | 271 | 2 | 0.355607115956135  |   |
| MV_Schw | C | 7179 | 126 | 0 | 0.305061614162072  |   |
| MV_Schw | A | 7180 | 29  | 1 |                    | 1 |
| MV_Schw | G | 7181 | 126 | 0 | 0.305061614162072  |   |
| MV_Schw | C | 7182 | 141 | 1 | 0.989441011726102  |   |
| MV_Schw | A | 7183 | 109 | 0 | 0.381672248067152  |   |
| MV_Schw | T | 7184 | 41  | 0 |                    | 1 |
| MV_Schw | C | 7185 | 83  | 0 | 0.645428736569362  |   |
| MV_Schw | A | 7186 | 72  | 0 | 0.791667533131283  |   |
| MV_Schw | A | 7187 | 48  | 2 | 0.709032941865358  |   |
| MV_Schw | G | 7188 | 244 | 2 | 0.528591092326266  |   |
| MV_Schw | C | 7189 | 455 | 9 |                    | 1 |
| MV_Schw | C | 7190 | 21  | 0 |                    | 1 |
| MV_Schw | C | 7191 | 33  | 0 |                    | 1 |
| MV_Schw | A | 7192 | 50  | 1 |                    | 1 |
| MV_Schw | C | 7193 | 244 | 4 |                    | 1 |
| MV_Schw | C | 7194 | 70  | 1 |                    | 1 |
| MV_Schw | T | 7195 | 35  | 0 |                    | 1 |
| MV_Schw | G | 7196 | 124 | 1 |                    | 1 |
| MV_Schw | A | 7197 | 72  | 0 | 0.791667533131283  |   |
| MV_Schw | A | 7198 | 97  | 3 |                    | 1 |

|         |   |      |     |   |                   |
|---------|---|------|-----|---|-------------------|
| MV_Schw | A | 7199 | 184 | 0 | 0.060993248324147 |
| MV_Schw | T | 7200 | 103 | 1 | 1                 |
| MV_Schw | T | 7201 | 10  | 0 | 1                 |
| MV_Schw | A | 7202 | 33  | 1 | 1                 |
| MV_Schw | T | 7203 | 64  | 1 | 1                 |
| MV_Schw | C | 7204 | 300 | 2 | 0.239446226094413 |
| MV_Schw | T | 7205 | 45  | 1 | 1                 |
| MV_Schw | C | 7206 | 109 | 3 | 1                 |
| MV_Schw | C | 7207 | 60  | 1 | 1                 |
| MV_Schw | G | 7208 | 116 | 1 | 1                 |
| MV_Schw | G | 7209 | 70  | 0 | 0.789229943133706 |
| MV_Schw | C | 7210 | 312 | 6 | 1                 |
| MV_Schw | T | 7211 | 23  | 0 | 1                 |
| MV_Schw | T | 7212 | 14  | 0 | 1                 |
| MV_Schw | C | 7213 | 23  | 2 | 0.296710762771661 |
| MV_Schw | C | 7214 | 103 | 3 | 1                 |
| MV_Schw | C | 7215 | 70  | 0 | 0.789229943133706 |
| MV_Schw | T | 7216 | 4   | 0 | 1                 |
| MV_Schw | C | 7217 | 17  | 0 | 1                 |
| MV_Schw | T | 7218 | 19  | 0 | 1                 |
| MV_Schw | G | 7219 | 37  | 0 | 1                 |
| MV_Schw | G | 7220 | 52  | 0 | 0.950262622850522 |
| MV_Schw | C | 7221 | 105 | 1 | 0.944944073306986 |
| MV_Schw | C | 7222 | 37  | 1 | 1                 |
| MV_Schw | G | 7223 | 126 | 0 | 0.305061614162072 |
| MV_Schw | A | 7224 | 17  | 0 | 1                 |
| MV_Schw | A | 7225 | 48  | 1 | 1                 |
| MV_Schw | C | 7226 | 89  | 0 | 0.497615650989996 |
| MV_Schw | A | 7227 | 6   | 0 | 1                 |
| MV_Schw | A | 7228 | 2   | 0 | 1                 |
| MV_Schw | T | 7229 | 10  | 0 | 1                 |
| MV_Schw | A | 7230 | 41  | 1 | 1                 |
| MV_Schw | T | 7231 | 21  | 1 | 0.632968068765344 |
| MV_Schw | C | 7232 | 27  | 1 | 1                 |
| MV_Schw | G | 7233 | 91  | 4 | 0.5275876261426   |
| MV_Schw | G | 7234 | 70  | 3 | 0.819327818667335 |

|         |   |      |     |   |                   |
|---------|---|------|-----|---|-------------------|
| MV_Schw | T | 7235 | 14  | 1 | 0.944879389258477 |
| MV_Schw | A | 7236 | 56  | 1 | 1                 |
| MV_Schw | G | 7237 | 72  | 3 | 0.822598489333375 |
| MV_Schw | T | 7238 | 4   | 0 | 1                 |
| MV_Schw | T | 7239 | 4   | 0 | 1                 |
| MV_Schw | A | 7240 | 27  | 1 | 1                 |
| MV_Schw | A | 7241 | 56  | 1 | 1                 |
| MV_Schw | T | 7242 | 81  | 0 | 0.641186461810141 |
| MV_Schw | C | 7243 | 174 | 1 | 0.648224297390367 |
| MV_Schw | A | 7244 | 52  | 1 | 1                 |
| MV_Schw | A | 7245 | 4   | 0 | 1                 |
| MV_Schw | A | 7246 | 21  | 0 | 1                 |
| MV_Schw | A | 7247 | 17  | 1 | 0.528591092326266 |
| MV_Schw | C | 7248 | 83  | 0 | 0.645428736569362 |
| MV_Schw | T | 7249 | 10  | 0 | 1                 |
| MV_Schw | T | 7250 | 8   | 0 | 1                 |
| MV_Schw | A | 7251 | 29  | 2 | 0.389821719583598 |
| MV_Schw | G | 7252 | 10  | 0 | 1                 |
| MV_Schw | G | 7253 | 8   | 0 | 1                 |
| MV_Schw | G | 7254 | 27  | 0 | 1                 |
| MV_Schw | T | 7255 | 25  | 0 | 1                 |
| MV_Schw | G | 7256 | 318 | 3 | 0.649372270546162 |
| MV_Schw | C | 7257 | 161 | 1 | 0.440157375549872 |
| MV_Schw | A | 7258 | 50  | 0 | 0.950262622850522 |
| MV_Schw | A | 7259 | 583 | 5 | 0.139295079777658 |
| MV_Schw | G | 7260 | 136 | 1 | 0.667619064364632 |
| MV_Schw | A | 7261 | 136 | 1 | 0.983041048229953 |
| MV_Schw | T | 7262 | 8   | 0 | 1                 |
| MV_Schw | C | 7263 | 99  | 1 | 0.944879389258477 |
| MV_Schw | A | 7264 | 171 | 1 | 0.789229943133706 |
| MV_Schw | T | 7265 | 31  | 0 | 1                 |
| MV_Schw | C | 7266 | 359 | 7 | 1                 |
| MV_Schw | C | 7267 | 446 | 5 | 0.618143728331124 |
| MV_Schw | A | 7268 | 6   | 0 | 1                 |
| MV_Schw | C | 7269 | 35  | 0 | 1                 |
| MV_Schw | A | 7270 | 29  | 1 | 0.789229943133706 |

|         |   |      |     |   |                    |   |
|---------|---|------|-----|---|--------------------|---|
| MV_Schw | A | 7271 | 12  | 0 |                    | 1 |
| MV_Schw | T | 7272 | 97  | 2 |                    | 1 |
| MV_Schw | G | 7273 | 87  | 5 | 0.0828028839836376 |   |
| MV_Schw | T | 7274 | 10  | 0 |                    | 1 |
| MV_Schw | C | 7275 | 37  | 1 |                    | 1 |
| MV_Schw | A | 7276 | 48  | 0 | 0.950262622850522  |   |
| MV_Schw | C | 7277 | 287 | 3 | 0.499662168427985  |   |
| MV_Schw | C | 7278 | 31  | 1 |                    | 1 |
| MV_Schw | A | 7279 | 33  | 0 |                    | 1 |
| MV_Schw | C | 7280 | 97  | 3 | 0.78354985902497   |   |
| MV_Schw | A | 7281 | 39  | 0 |                    | 1 |
| MV_Schw | A | 7282 | 41  | 1 |                    | 1 |
| MV_Schw | C | 7283 | 147 | 1 | 0.88950624150852   |   |
| MV_Schw | G | 7284 | 35  | 1 | 0.863499923807603  |   |
| MV_Schw | A | 7285 | 33  | 0 |                    | 1 |
| MV_Schw | G | 7286 | 64  | 5 | 0.0611551441006359 |   |
| MV_Schw | A | 7287 | 25  | 1 | 0.704667204683568  |   |
| MV_Schw | C | 7288 | 72  | 2 |                    | 1 |
| MV_Schw | C | 7289 | 171 | 1 | 0.789229943133706  |   |
| MV_Schw | G | 7290 | 91  | 3 |                    | 1 |
| MV_Schw | G | 7291 | 151 | 4 |                    | 1 |
| MV_Schw | A | 7292 | 41  | 1 |                    | 1 |
| MV_Schw | T | 7293 | 110 | 3 |                    | 1 |
| MV_Schw | A | 7294 | 25  | 1 |                    | 1 |
| MV_Schw | A | 7295 | 39  | 2 | 0.560243889454362  |   |
| MV_Schw | A | 7296 | 43  | 1 |                    | 1 |
| MV_Schw | T | 7297 | 48  | 1 |                    | 1 |
| MV_Schw | G | 7298 | 198 | 5 | 0.951329267517125  |   |
| MV_Schw | C | 7299 | 23  | 1 |                    | 1 |
| MV_Schw | C | 7300 | 355 | 6 |                    | 1 |
| MV_Schw | T | 7301 | 2   | 0 |                    | 1 |
| MV_Schw | T | 7302 | 25  | 1 |                    | 1 |
| MV_Schw | C | 7303 | 41  | 1 |                    | 1 |
| MV_Schw | T | 7304 | 72  | 2 |                    | 1 |
| MV_Schw | A | 7305 | 23  | 0 |                    | 1 |
| MV_Schw | C | 7306 | 271 | 7 | 0.945767847051808  |   |

|         |   |      |     |   |                   |   |
|---------|---|------|-----|---|-------------------|---|
| MV_Schw | A | 7307 | 31  | 1 |                   | 1 |
| MV_Schw | A | 7308 | 14  | 0 |                   | 1 |
| MV_Schw | A | 7309 | 99  | 2 |                   | 1 |
| MV_Schw | G | 7310 | 130 | 3 |                   | 1 |
| MV_Schw | A | 7311 | 29  | 1 |                   | 1 |
| MV_Schw | T | 7312 | 12  | 0 |                   | 1 |
| MV_Schw | A | 7313 | 17  | 0 |                   | 1 |
| MV_Schw | A | 7314 | 2   | 0 |                   | 1 |
| MV_Schw | C | 7315 | 64  | 3 | 0.609091736782917 |   |
| MV_Schw | C | 7316 | 33  | 2 | 0.463720798159947 |   |
| MV_Schw | C | 7317 | 74  | 1 |                   | 1 |
| MV_Schw | C | 7318 | 25  | 0 |                   | 1 |
| MV_Schw | C | 7319 | 21  | 0 |                   | 1 |
| MV_Schw | A | 7320 | 52  | 1 |                   | 1 |
| MV_Schw | T | 7321 | 21  | 0 |                   | 1 |
| MV_Schw | C | 7322 | 41  | 0 |                   | 1 |
| MV_Schw | C | 7323 | 14  | 1 | 0.944879389258477 |   |
| MV_Schw | C | 7324 | 37  | 1 |                   | 1 |
| MV_Schw | A | 7325 | 21  | 0 |                   | 1 |
| MV_Schw | A | 7326 | 56  | 0 | 0.950262622850522 |   |
| MV_Schw | G | 7327 | 114 | 2 |                   | 1 |
| MV_Schw | G | 7328 | 21  | 2 | 0.258627633593378 |   |
| MV_Schw | G | 7329 | 8   | 1 | 0.789229943133706 |   |
| MV_Schw | A | 7330 | 16  | 0 |                   | 1 |
| MV_Schw | A | 7331 | 6   | 0 |                   | 1 |
| MV_Schw | G | 7332 | 128 | 3 |                   | 1 |
| MV_Schw | T | 7333 | 4   | 0 |                   | 1 |
| MV_Schw | A | 7334 | 21  | 0 |                   | 1 |
| MV_Schw | G | 7335 | 54  | 0 | 0.950262622850522 |   |
| MV_Schw | G | 7336 | 114 | 1 | 0.789229943133706 |   |
| MV_Schw | A | 7337 | 31  | 1 |                   | 1 |
| MV_Schw | T | 7338 | 47  | 0 |                   | 1 |
| MV_Schw | A | 7339 | 4   | 0 |                   | 1 |
| MV_Schw | G | 7340 | 41  | 0 |                   | 1 |
| MV_Schw | T | 7341 | 4   | 0 |                   | 1 |
| MV_Schw | C | 7342 | 74  | 0 | 0.795198078226602 |   |

|         |   |      |     |   |                    |   |
|---------|---|------|-----|---|--------------------|---|
| MV_Schw | A | 7343 | 192 | 1 | 0.285482351071617  |   |
| MV_Schw | T | 7344 | 14  | 0 |                    | 1 |
| MV_Schw | T | 7345 | 27  | 0 |                    | 1 |
| MV_Schw | A | 7346 | 21  | 2 | 0.258627633593378  |   |
| MV_Schw | A | 7347 | 10  | 0 |                    | 1 |
| MV_Schw | C | 7348 | 138 | 2 |                    | 1 |
| MV_Schw | A | 7349 | 58  | 1 |                    | 1 |
| MV_Schw | G | 7350 | 97  | 1 | 0.944879389258477  |   |
| MV_Schw | A | 7351 | 43  | 1 |                    | 1 |
| MV_Schw | G | 7352 | 93  | 2 |                    | 1 |
| MV_Schw | A | 7353 | 6   | 2 | 0.0328674635647276 |   |
| MV_Schw | A | 7354 | 6   | 0 |                    | 1 |
| MV_Schw | C | 7355 | 101 | 3 |                    | 1 |
| MV_Schw | A | 7356 | 12  | 1 | 0.88950624150852   |   |
| MV_Schw | T | 7357 | 8   | 0 |                    | 1 |
| MV_Schw | C | 7358 | 58  | 1 |                    | 1 |
| MV_Schw | T | 7359 | 41  | 1 | 0.945767847051808  |   |
| MV_Schw | T | 7360 | 21  | 1 |                    | 1 |
| MV_Schw | A | 7361 | 12  | 1 | 0.88950624150852   |   |
| MV_Schw | T | 7362 | 45  | 1 |                    | 1 |
| MV_Schw | G | 7363 | 145 | 7 | 0.200033126993844  |   |
| MV_Schw | A | 7364 | 21  | 1 | 0.632968068765344  |   |
| MV_Schw | T | 7365 | 17  | 1 | 0.983041048229953  |   |
| MV_Schw | T | 7366 | 27  | 1 | 0.752394317790241  |   |
| MV_Schw | G | 7367 | 140 | 4 |                    | 1 |
| MV_Schw | A | 7368 | 16  | 0 |                    | 1 |
| MV_Schw | T | 7369 | 141 | 6 | 0.298485329352986  |   |
| MV_Schw | A | 7370 | 116 | 2 |                    | 1 |
| MV_Schw | G | 7371 | 29  | 1 |                    | 1 |
| MV_Schw | A | 7372 | 16  | 0 |                    | 1 |
| MV_Schw | C | 7373 | 33  | 2 | 0.463720798159947  |   |
| MV_Schw | C | 7374 | 124 | 5 | 0.52558001665221   |   |
| MV_Schw | T | 7375 | 10  | 0 |                    | 1 |
| MV_Schw | T | 7376 | 12  | 0 |                    | 1 |
| MV_Schw | A | 7377 | 33  | 0 |                    | 1 |
| MV_Schw | T | 7378 | 33  | 1 |                    | 1 |

|         |   |      |     |    |                   |   |
|---------|---|------|-----|----|-------------------|---|
| MV_Schw | G | 7379 | 262 | 7  | 0.819327818667335 |   |
| MV_Schw | T | 7380 | 25  | 0  |                   | 1 |
| MV_Schw | T | 7381 | 23  | 1  |                   | 1 |
| MV_Schw | T | 7382 | 37  | 0  |                   | 1 |
| MV_Schw | T | 7383 | 89  | 1  |                   | 1 |
| MV_Schw | G | 7384 | 186 | 3  |                   | 1 |
| MV_Schw | C | 7385 | 479 | 11 |                   | 1 |
| MV_Schw | T | 7386 | 70  | 2  |                   | 1 |
| MV_Schw | G | 7387 | 70  | 1  |                   | 1 |
| MV_Schw | G | 7388 | 17  | 0  |                   | 1 |
| MV_Schw | C | 7389 | 52  | 0  | 0.950262622850522 |   |
| MV_Schw | T | 7390 | 41  | 1  | 0.945767847051808 |   |
| MV_Schw | G | 7391 | 126 | 1  |                   | 1 |
| MV_Schw | T | 7392 | 16  | 0  |                   | 1 |
| MV_Schw | T | 7393 | 35  | 0  |                   | 1 |
| MV_Schw | C | 7394 | 31  | 1  | 0.791667533131283 |   |
| MV_Schw | T | 7395 | 70  | 1  |                   | 1 |
| MV_Schw | G | 7396 | 180 | 0  | 0.090192830807046 |   |
| MV_Schw | T | 7397 | 10  | 1  | 0.822598489333375 |   |
| MV_Schw | T | 7398 | 60  | 2  | 0.983041048229953 |   |
| MV_Schw | T | 7399 | 35  | 0  |                   | 1 |
| MV_Schw | G | 7400 | 95  | 1  |                   | 1 |
| MV_Schw | T | 7401 | 6   | 0  |                   | 1 |
| MV_Schw | C | 7402 | 112 | 1  | 0.789229943133706 |   |
| MV_Schw | A | 7403 | 48  | 1  |                   | 1 |
| MV_Schw | T | 7404 | 25  | 1  | 0.704667204683568 |   |
| MV_Schw | G | 7405 | 76  | 1  |                   | 1 |
| MV_Schw | T | 7406 | 10  | 0  |                   | 1 |
| MV_Schw | T | 7407 | 21  | 1  |                   | 1 |
| MV_Schw | T | 7408 | 16  | 0  |                   | 1 |
| MV_Schw | C | 7409 | 250 | 3  | 0.789229943133706 |   |
| MV_Schw | T | 7410 | 41  | 0  |                   | 1 |
| MV_Schw | G | 7411 | 223 | 6  | 0.981946864240757 |   |
| MV_Schw | A | 7412 | 17  | 0  |                   | 1 |
| MV_Schw | G | 7413 | 308 | 4  | 0.863499923807603 |   |
| MV_Schw | C | 7414 | 54  | 1  |                   | 1 |

|         |   |      |     |   |                   |   |
|---------|---|------|-----|---|-------------------|---|
| MV_Schw | T | 7415 | 4   | 0 |                   | 1 |
| MV_Schw | T | 7416 | 43  | 1 |                   | 1 |
| MV_Schw | G | 7417 | 140 | 1 | 0.986363032184908 |   |
| MV_Schw | A | 7418 | 95  | 0 | 0.499662168427985 |   |
| MV_Schw | T | 7419 | 128 | 3 |                   | 1 |
| MV_Schw | C | 7420 | 233 | 4 |                   | 1 |
| MV_Schw | G | 7421 | 83  | 2 |                   | 1 |
| MV_Schw | G | 7422 | 97  | 1 |                   | 1 |
| MV_Schw | G | 7423 | 236 | 4 |                   | 1 |
| MV_Schw | T | 7424 | 130 | 3 |                   | 1 |
| MV_Schw | T | 7425 | 16  | 0 |                   | 1 |
| MV_Schw | G | 7426 | 234 | 1 | 0.296710762771661 |   |
| MV_Schw | C | 7427 | 79  | 1 |                   | 1 |
| MV_Schw | T | 7428 | 70  | 1 |                   | 1 |
| MV_Schw | A | 7429 | 163 | 3 |                   | 1 |
| MV_Schw | G | 7430 | 225 | 5 |                   | 1 |
| MV_Schw | C | 7431 | 43  | 0 |                   | 1 |
| MV_Schw | C | 7432 | 16  | 1 | 0.950262622850522 |   |
| MV_Schw | A | 7433 | 70  | 2 |                   | 1 |
| MV_Schw | T | 7434 | 8   | 0 |                   | 1 |
| MV_Schw | T | 7435 | 52  | 0 | 0.950262622850522 |   |
| MV_Schw | G | 7436 | 58  | 0 | 0.953489044526869 |   |
| MV_Schw | C | 7437 | 388 | 8 |                   | 1 |
| MV_Schw | A | 7438 | 37  | 1 |                   | 1 |
| MV_Schw | G | 7439 | 85  | 0 | 0.648224297390367 |   |
| MV_Schw | G | 7440 | 50  | 0 | 0.950262622850522 |   |
| MV_Schw | C | 7441 | 35  | 1 |                   | 1 |
| MV_Schw | A | 7442 | 50  | 2 | 0.746970975838775 |   |
| MV_Schw | T | 7443 | 52  | 1 |                   | 1 |
| MV_Schw | T | 7444 | 62  | 0 | 0.789229943133706 |   |
| MV_Schw | A | 7445 | 16  | 1 | 0.950262622850522 |   |
| MV_Schw | G | 7446 | 120 | 0 | 0.297586725038221 |   |
| MV_Schw | A | 7447 | 29  | 1 |                   | 1 |
| MV_Schw | C | 7448 | 225 | 2 | 0.632968068765344 |   |
| MV_Schw | T | 7449 | 12  | 1 | 0.88950624150852  |   |
| MV_Schw | T | 7450 | 14  | 1 | 0.944879389258477 |   |



|         |   |      |     |    |                   |   |
|---------|---|------|-----|----|-------------------|---|
| MV_Schw | C | 7451 | 97  | 1  |                   | 1 |
| MV_Schw | A | 7452 | 54  | 1  |                   | 1 |
| MV_Schw | T | 7453 | 112 | 2  |                   | 1 |
| MV_Schw | C | 7454 | 428 | 9  |                   | 1 |
| MV_Schw | G | 7455 | 128 | 3  |                   | 1 |
| MV_Schw | G | 7456 | 81  | 3  | 0.88950624150852  |   |
| MV_Schw | G | 7457 | 39  | 1  | 0.9314909603024   |   |
| MV_Schw | C | 7458 | 667 | 10 | 0.789229943133706 |   |
| MV_Schw | A | 7459 | 50  | 2  | 0.746970975838775 |   |
| MV_Schw | G | 7460 | 205 | 7  | 0.619556855087002 |   |
| MV_Schw | C | 7461 | 19  | 1  |                   | 1 |
| MV_Schw | C | 7462 | 99  | 4  | 0.560243889454362 |   |
| MV_Schw | A | 7463 | 48  | 0  | 0.950262622850522 |   |
| MV_Schw | T | 7464 | 33  | 1  | 0.822598489333375 |   |
| MV_Schw | C | 7465 | 107 | 3  |                   | 1 |
| MV_Schw | T | 7466 | 21  | 0  |                   | 1 |
| MV_Schw | A | 7467 | 52  | 0  | 0.950262622850522 |   |
| MV_Schw | C | 7468 | 134 | 2  |                   | 1 |
| MV_Schw | A | 7469 | 50  | 0  | 0.950262622850522 |   |
| MV_Schw | C | 7470 | 64  | 1  |                   | 1 |
| MV_Schw | C | 7471 | 217 | 7  | 0.770363429662708 |   |
| MV_Schw | G | 7472 | 39  | 1  | 0.9314909603024   |   |
| MV_Schw | C | 7473 | 463 | 8  |                   | 1 |
| MV_Schw | A | 7474 | 39  | 1  |                   | 1 |
| MV_Schw | G | 7475 | 529 | 9  |                   | 1 |
| MV_Schw | A | 7476 | 6   | 0  |                   | 1 |
| MV_Schw | G | 7477 | 27  | 0  |                   | 1 |
| MV_Schw | A | 7478 | 6   | 0  |                   | 1 |
| MV_Schw | T | 7479 | 16  | 0  |                   | 1 |
| MV_Schw | C | 7480 | 35  | 0  |                   | 1 |
| MV_Schw | C | 7481 | 25  | 0  |                   | 1 |
| MV_Schw | A | 7482 | 110 | 3  |                   | 1 |
| MV_Schw | T | 7483 | 39  | 0  |                   | 1 |
| MV_Schw | A | 7484 | 165 | 3  |                   | 1 |
| MV_Schw | A | 7485 | 25  | 2  | 0.314611398059001 |   |
| MV_Schw | A | 7486 | 29  | 1  |                   | 1 |

|         |    |      |     |   |                   |    |
|---------|----|------|-----|---|-------------------|----|
| MV_Schw | A  | 7487 | 27  | 0 |                   | 1  |
| MV_Schw | G  | 7488 | 341 | 6 |                   | 1  |
| MV_Schw | C  | 7489 | 31  | 0 |                   | 1  |
| MV_Schw | C  | 7490 | 331 | 6 |                   | 1  |
| MV_Schw | T  | 7491 | 29  | 0 |                   | 1  |
| MV_Schw | C  | 7492 | 105 | 1 |                   | 1  |
| MV_Schw | A  | 7493 | 54  | 1 |                   | 1  |
| MV_Schw | G  | 7494 | 45  | 1 |                   | 1  |
| MV_Schw | C  | 7495 | 388 | 2 | 0.052500020365831 | 1  |
| MV_Schw | A  | 7496 | 33  | 0 |                   | 1  |
| MV_Schw | C  | 7497 | 41  | 0 |                   | 1  |
| MV_Schw | C  | 7498 | 12  | 0 |                   | 1  |
| MV_Schw | A  | 7499 | 35  | 0 |                   | 1  |
| MV_Schw | A  | 7500 | 25  | 0 |                   | 1  |
| MV_Schw | T  | 7501 | 70  | 1 |                   | 1  |
| MV_Schw | C  | 7502 | 52  | 0 | 0.950262622850522 | 1  |
| MV_Schw | T  | 7503 | 4   | 0 |                   | 1  |
| MV_Schw | A  | 7504 | 4   | 0 |                   | 1  |
| MV_Schw | G  | 7505 | 79  | 1 |                   | 1  |
| MV_Schw | A  | 7506 | 23  | 1 |                   | 1  |
| MV_Schw | T  | 7507 | 2   | 0 |                   | 1  |
| MV_Schw | G  | 7508 | 14  | 0 |                   | 1  |
| MV_Schw | T  | 7509 | 2   | 0 |                   | 1  |
| MV_Schw | A  | 7510 | 17  | 0 |                   | 1  |
| MV_Schw | A  | 7511 | 8   | 1 | 0.789229943133706 | 1  |
| MV_Schw | C  | 7512 | 151 | 3 |                   | 1  |
| MV_Schw | NA | 7513 | 0   | 0 |                   | NA |
| MV_Schw | A  | 7514 | 4   | 0 |                   | 1  |
| MV_Schw | A  | 7515 | 62  | 1 |                   | 1  |
| MV_Schw | C  | 7516 | 112 | 1 | 0.789229943133706 | 1  |
| MV_Schw | NA | 7517 | 0   | 0 |                   | NA |
| MV_Schw | C  | 7518 | 31  | 0 |                   | 1  |
| MV_Schw | A  | 7519 | 8   | 0 |                   | 1  |
| MV_Schw | A  | 7520 | 35  | 0 |                   | 1  |
| MV_Schw | T  | 7521 | 23  | 0 |                   | 1  |
| MV_Schw | C  | 7522 | 93  | 1 |                   | 1  |

|         |    |      |     |    |                   |    |
|---------|----|------|-----|----|-------------------|----|
| MV_Schw | G  | 7523 | 19  | 0  |                   | 1  |
| MV_Schw | NA | 7524 | 0   | 0  |                   | NA |
| MV_Schw | G  | 7525 | 89  | 5  | 0.090192830807046 |    |
| MV_Schw | C  | 7526 | 256 | 10 | 0.201986157592846 |    |
| MV_Schw | A  | 7527 | 50  | 0  | 0.950262622850522 |    |
| MV_Schw | T  | 7528 | 31  | 0  |                   | 1  |
| MV_Schw | C  | 7529 | 35  | 0  |                   | 1  |
| MV_Schw | A  | 7530 | 45  | 0  |                   | 1  |
| MV_Schw | G  | 7531 | 47  | 1  |                   | 1  |
| MV_Schw | G  | 7532 | 163 | 1  | 0.785635770321324 |    |
| MV_Schw | T  | 7533 | 48  | 1  |                   | 1  |
| MV_Schw | C  | 7534 | 370 | 3  | 0.196555254910230 |    |
| MV_Schw | A  | 7535 | 21  | 0  |                   | 1  |
| MV_Schw | A  | 7536 | 85  | 1  |                   | 1  |
| MV_Schw | G  | 7537 | 287 | 6  |                   | 1  |
| MV_Schw | G  | 7538 | 198 | 4  |                   | 1  |
| MV_Schw | A  | 7539 | 10  | 0  |                   | 1  |
| MV_Schw | C  | 7540 | 128 | 1  | 0.658415249679101 |    |
| MV_Schw | G  | 7541 | 107 | 1  |                   | 1  |
| MV_Schw | T  | 7542 | 99  | 3  |                   | 1  |
| MV_Schw | G  | 7543 | 440 | 7  | 0.950262622850522 |    |
| MV_Schw | C  | 7544 | 285 | 4  |                   | 1  |
| MV_Schw | T  | 7545 | 109 | 1  | 0.947544583923452 |    |
| MV_Schw | G  | 7546 | 153 | 4  |                   | 1  |
| MV_Schw | A  | 7547 | 83  | 1  |                   | 1  |
| MV_Schw | C  | 7548 | 380 | 7  |                   | 1  |
| MV_Schw | A  | 7549 | 17  | 1  | 0.983041048229953 |    |
| MV_Schw | C  | 7550 | 79  | 3  | 0.658415249679101 |    |
| MV_Schw | C  | 7551 | 81  | 1  |                   | 1  |
| MV_Schw | A  | 7552 | 8   | 1  | 0.258627633593378 |    |
| MV_Schw | C  | 7553 | 41  | 0  |                   | 1  |
| MV_Schw | T  | 7554 | 12  | 0  |                   | 1  |
| MV_Schw | C  | 7555 | 50  | 0  | 0.950262622850522 |    |
| MV_Schw | T  | 7556 | 27  | 0  |                   | 1  |
| MV_Schw | T  | 7557 | 14  | 1  | 0.944879389258477 |    |
| MV_Schw | C  | 7558 | 72  | 1  |                   | 1  |

|         |   |      |     |    |                    |
|---------|---|------|-----|----|--------------------|
| MV_Schw | A | 7559 | 35  | 1  | 0.863499923807603  |
| MV_Schw | A | 7560 | 27  | 1  | 1                  |
| MV_Schw | A | 7561 | 47  | 5  | 0.0168325917140815 |
| MV_Schw | A | 7562 | 17  | 1  | 0.983041048229953  |
| MV_Schw | T | 7563 | 54  | 3  | 0.480219983992261  |
| MV_Schw | C | 7564 | 29  | 1  | 1                  |
| MV_Schw | A | 7565 | 48  | 1  | 1                  |
| MV_Schw | T | 7566 | 78  | 1  | 1                  |
| MV_Schw | C | 7567 | 141 | 1  | 0.989441011726102  |
| MV_Schw | G | 7568 | 41  | 3  | 0.114736910412178  |
| MV_Schw | G | 7569 | 27  | 1  | 1                  |
| MV_Schw | T | 7570 | 10  | 0  | 1                  |
| MV_Schw | G | 7571 | 99  | 3  | 0.789229943133706  |
| MV_Schw | A | 7572 | 41  | 2  | 0.599534349993353  |
| MV_Schw | T | 7573 | 19  | 1  | 1                  |
| MV_Schw | G | 7574 | 33  | 1  | 1                  |
| MV_Schw | A | 7575 | 25  | 1  | 1                  |
| MV_Schw | A | 7576 | 23  | 1  | 1                  |
| MV_Schw | G | 7577 | 215 | 7  | 0.499662168427985  |
| MV_Schw | T | 7578 | 29  | 0  | 1                  |
| MV_Schw | G | 7579 | 37  | 1  | 0.88950624150852   |
| MV_Schw | G | 7580 | 54  | 3  | 0.480219983992261  |
| MV_Schw | G | 7581 | 136 | 1  | 0.667619064364632  |
| MV_Schw | C | 7582 | 178 | 5  | 0.804012574266476  |
| MV_Schw | C | 7583 | 109 | 0  | 0.381672248067152  |
| MV_Schw | T | 7584 | 43  | 1  | 1                  |
| MV_Schw | G | 7585 | 109 | 1  | 1                  |
| MV_Schw | A | 7586 | 47  | 0  | 1                  |
| MV_Schw | G | 7587 | 659 | 12 | 1                  |
| MV_Schw | G | 7588 | 149 | 2  | 1                  |
| MV_Schw | A | 7589 | 10  | 0  | 1                  |
| MV_Schw | C | 7590 | 25  | 1  | 1                  |
| MV_Schw | A | 7591 | 12  | 0  | 1                  |
| MV_Schw | C | 7592 | 19  | 0  | 1                  |
| MV_Schw | C | 7593 | 97  | 1  | 1                  |
| MV_Schw | T | 7594 | 10  | 0  | 1                  |

|         |   |      |     |   |                    |   |
|---------|---|------|-----|---|--------------------|---|
| MV_Schw | C | 7595 | 101 | 0 | 0.51781700540984   |   |
| MV_Schw | A | 7596 | 17  | 0 |                    | 1 |
| MV_Schw | G | 7597 | 277 | 1 | 0.1394444451992631 |   |
| MV_Schw | A | 7598 | 19  | 0 |                    | 1 |
| MV_Schw | G | 7599 | 105 | 1 | 0.944944073306986  |   |
| MV_Schw | A | 7600 | 6   | 0 |                    | 1 |
| MV_Schw | T | 7601 | 4   | 0 |                    | 1 |
| MV_Schw | T | 7602 | 8   | 0 |                    | 1 |
| MV_Schw | C | 7603 | 97  | 1 |                    | 1 |
| MV_Schw | A | 7604 | 31  | 0 |                    | 1 |
| MV_Schw | C | 7605 | 167 | 1 | 0.788293646497135  |   |
| MV_Schw | T | 7606 | 19  | 0 |                    | 1 |
| MV_Schw | G | 7607 | 39  | 1 |                    | 1 |
| MV_Schw | A | 7608 | 4   | 0 |                    | 1 |
| MV_Schw | C | 7609 | 10  | 0 |                    | 1 |
| MV_Schw | C | 7610 | 12  | 0 |                    | 1 |
| MV_Schw | T | 7611 | 6   | 0 |                    | 1 |
| MV_Schw | A | 7612 | 6   | 0 |                    | 1 |
| MV_Schw | G | 7613 | 74  | 0 | 0.795198078226602  |   |
| MV_Schw | T | 7614 | 6   | 0 |                    | 1 |
| MV_Schw | G | 7615 | 74  | 0 | 0.795198078226602  |   |
| MV_Schw | A | 7616 | 4   | 0 |                    | 1 |
| MV_Schw | A | 7617 | 37  | 1 |                    | 1 |
| MV_Schw | A | 7618 | 50  | 0 | 0.950262622850522  |   |
| MV_Schw | T | 7619 | 78  | 1 |                    | 1 |
| MV_Schw | T | 7620 | 21  | 0 |                    | 1 |
| MV_Schw | A | 7621 | 4   | 0 |                    | 1 |
| MV_Schw | A | 7622 | 14  | 1 | 0.944879389258477  |   |
| MV_Schw | T | 7623 | 21  | 0 |                    | 1 |
| MV_Schw | C | 7624 | 74  | 1 |                    | 1 |
| MV_Schw | T | 7625 | 2   | 0 |                    | 1 |
| MV_Schw | C | 7626 | 8   | 0 |                    | 1 |
| MV_Schw | T | 7627 | 19  | 0 |                    | 1 |
| MV_Schw | G | 7628 | 41  | 0 |                    | 1 |
| MV_Schw | A | 7629 | 8   | 0 |                    | 1 |
| MV_Schw | C | 7630 | 43  | 0 |                    | 1 |

|         |    |      |     |   |                    |
|---------|----|------|-----|---|--------------------|
| MV_Schw | NA | 7631 | 0   | 0 | NA                 |
| MV_Schw | A  | 7632 | 2   | 0 | 1                  |
| MV_Schw | G  | 7633 | 19  | 1 | 1                  |
| MV_Schw | A  | 7634 | 14  | 0 | 1                  |
| MV_Schw | T  | 7635 | 16  | 0 | 1                  |
| MV_Schw | T  | 7636 | 2   | 0 | 1                  |
| MV_Schw | A  | 7637 | 17  | 1 | 0.983041048229953  |
| MV_Schw | A  | 7638 | 12  | 0 | 1                  |
| MV_Schw | A  | 7639 | 16  | 0 | 1                  |
| MV_Schw | T  | 7640 | 52  | 1 | 1                  |
| MV_Schw | T  | 7641 | 2   | 0 | 1                  |
| MV_Schw | C  | 7642 | 99  | 2 | 1                  |
| MV_Schw | C  | 7643 | 76  | 0 | 0.638894311640422  |
| MV_Schw | T  | 7644 | 2   | 0 | 1                  |
| MV_Schw | T  | 7645 | 14  | 1 | 0.944879389258477  |
| MV_Schw | A  | 7646 | 4   | 0 | 1                  |
| MV_Schw | A  | 7647 | 16  | 0 | 1                  |
| MV_Schw | T  | 7648 | 19  | 0 | 1                  |
| MV_Schw | C  | 7649 | 21  | 1 | 1                  |
| MV_Schw | C  | 7650 | 140 | 0 | 0.230921379149447  |
| MV_Schw | G  | 7651 | 27  | 0 | 1                  |
| MV_Schw | G  | 7652 | 118 | 7 | 0.0609203493175034 |
| MV_Schw | A  | 7653 | 85  | 3 | 0.918952129071198  |
| MV_Schw | T  | 7654 | 47  | 1 | 1                  |
| MV_Schw | A  | 7655 | 16  | 0 | 1                  |
| MV_Schw | G  | 7656 | 74  | 0 | 0.795198078226602  |
| MV_Schw | G  | 7657 | 21  | 1 | 1                  |
| MV_Schw | G  | 7658 | 12  | 0 | 1                  |
| MV_Schw | A  | 7659 | 10  | 1 | 0.822598489333375  |
| MV_Schw | G  | 7660 | 105 | 1 | 0.944944073306986  |
| MV_Schw | T  | 7661 | 83  | 0 | 0.645428736569362  |
| MV_Schw | A  | 7662 | 47  | 0 | 1                  |
| MV_Schw | C  | 7663 | 328 | 4 | 0.789229943133706  |
| MV_Schw | G  | 7664 | 33  | 0 | 1                  |
| MV_Schw | A  | 7665 | 12  | 0 | 1                  |
| MV_Schw | C  | 7666 | 97  | 2 | 1                  |

|         |   |      |     |   |                   |   |
|---------|---|------|-----|---|-------------------|---|
| MV_Schw | T | 7667 | 37  | 1 |                   | 1 |
| MV_Schw | T | 7668 | 12  | 0 |                   | 1 |
| MV_Schw | C | 7669 | 155 | 2 |                   | 1 |
| MV_Schw | A | 7670 | 50  | 1 |                   | 1 |
| MV_Schw | G | 7671 | 157 | 1 | 0.88950624150852  |   |
| MV_Schw | A | 7672 | 16  | 0 |                   | 1 |
| MV_Schw | G | 7673 | 83  | 1 |                   | 1 |
| MV_Schw | A | 7674 | 8   | 0 |                   | 1 |
| MV_Schw | T | 7675 | 29  | 0 |                   | 1 |
| MV_Schw | C | 7676 | 85  | 0 | 0.648224297390367 |   |
| MV_Schw | T | 7677 | 4   | 0 |                   | 1 |
| MV_Schw | C | 7678 | 60  | 0 | 0.957721317456694 |   |
| MV_Schw | A | 7679 | 52  | 1 |                   | 1 |
| MV_Schw | C | 7680 | 211 | 1 | 0.445919862395878 |   |
| MV_Schw | T | 7681 | 23  | 1 | 0.658415249679101 |   |
| MV_Schw | T | 7682 | 8   | 0 |                   | 1 |
| MV_Schw | G | 7683 | 58  | 1 |                   | 1 |
| MV_Schw | G | 7684 | 8   | 1 | 0.789229943133706 |   |
| MV_Schw | T | 7685 | 6   | 0 |                   | 1 |
| MV_Schw | G | 7686 | 143 | 3 |                   | 1 |
| MV_Schw | T | 7687 | 60  | 1 |                   | 1 |
| MV_Schw | A | 7688 | 14  | 1 | 0.944879389258477 |   |
| MV_Schw | T | 7689 | 8   | 0 |                   | 1 |
| MV_Schw | C | 7690 | 76  | 2 |                   | 1 |
| MV_Schw | A | 7691 | 21  | 0 |                   | 1 |
| MV_Schw | A | 7692 | 6   | 0 |                   | 1 |
| MV_Schw | C | 7693 | 68  | 1 |                   | 1 |
| MV_Schw | C | 7694 | 219 | 5 |                   | 1 |
| MV_Schw | C | 7695 | 58  | 2 | 0.98139756833885  |   |
| MV_Schw | G | 7696 | 114 | 3 | 0.953489044526869 |   |
| MV_Schw | C | 7697 | 81  | 3 | 0.88950624150852  |   |
| MV_Schw | C | 7698 | 109 | 1 |                   | 1 |
| MV_Schw | A | 7699 | 29  | 1 |                   | 1 |
| MV_Schw | G | 7700 | 138 | 4 | 0.997314673407775 |   |
| MV_Schw | A | 7701 | 116 | 2 |                   | 1 |
| MV_Schw | G | 7702 | 16  | 0 |                   | 1 |

|         |   |      |     |   |                   |   |
|---------|---|------|-----|---|-------------------|---|
| MV_Schw | A | 7703 | 10  | 1 | 0.822598489333375 |   |
| MV_Schw | G | 7704 | 29  | 0 |                   | 1 |
| MV_Schw | A | 7705 | 14  | 0 |                   | 1 |
| MV_Schw | A | 7706 | 149 | 1 | 0.88950624150852  |   |
| MV_Schw | T | 7707 | 19  | 1 |                   | 1 |
| MV_Schw | C | 7708 | 12  | 0 |                   | 1 |
| MV_Schw | A | 7709 | 27  | 0 |                   | 1 |
| MV_Schw | A | 7710 | 4   | 0 |                   | 1 |
| MV_Schw | A | 7711 | 39  | 2 | 0.560243889454362 |   |
| MV_Schw | T | 7712 | 37  | 1 |                   | 1 |
| MV_Schw | T | 7713 | 25  | 1 |                   | 1 |
| MV_Schw | G | 7714 | 39  | 1 | 0.9314909603024   |   |
| MV_Schw | G | 7715 | 10  | 0 |                   | 1 |
| MV_Schw | A | 7716 | 54  | 2 | 0.789229943133706 |   |
| MV_Schw | T | 7717 | 39  | 1 | 0.9314909603024   |   |
| MV_Schw | T | 7718 | 4   | 1 | 0.619556855087002 |   |
| MV_Schw | A | 7719 | 4   | 0 |                   | 1 |
| MV_Schw | T | 7720 | 0   | 0 |                   | 1 |
| MV_Schw | G | 7721 | 122 | 1 |                   | 1 |
| MV_Schw | A | 7722 | 87  | 3 | 0.935220820395243 |   |
| MV_Schw | T | 7723 | 27  | 1 | 0.752394317790241 |   |
| MV_Schw | C | 7724 | 76  | 1 |                   | 1 |
| MV_Schw | A | 7725 | 17  | 0 |                   | 1 |
| MV_Schw | A | 7726 | 14  | 0 |                   | 1 |
| MV_Schw | T | 7727 | 4   | 0 |                   | 1 |
| MV_Schw | A | 7728 | 14  | 0 |                   | 1 |
| MV_Schw | C | 7729 | 12  | 1 | 0.88950624150852  |   |
| MV_Schw | T | 7730 | 4   | 0 |                   | 1 |
| MV_Schw | G | 7731 | 37  | 0 |                   | 1 |
| MV_Schw | T | 7732 | 149 | 1 | 0.88950624150852  |   |
| MV_Schw | G | 7733 | 161 | 1 | 0.440157375549872 |   |
| MV_Schw | C | 7734 | 128 | 1 | 0.658415249679101 |   |
| MV_Schw | A | 7735 | 10  | 0 |                   | 1 |
| MV_Schw | G | 7736 | 41  | 2 | 0.599534349993353 |   |
| MV_Schw | A | 7737 | 14  | 0 |                   | 1 |
| MV_Schw | T | 7738 | 68  | 1 |                   | 1 |



|         |   |      |     |   |                    |   |
|---------|---|------|-----|---|--------------------|---|
| MV_Schw | G | 7739 | 47  | 1 |                    | 1 |
| MV_Schw | T | 7740 | 41  | 1 |                    | 1 |
| MV_Schw | G | 7741 | 87  | 1 |                    | 1 |
| MV_Schw | G | 7742 | 21  | 1 |                    | 1 |
| MV_Schw | C | 7743 | 200 | 6 | 0.834614336236472  |   |
| MV_Schw | T | 7744 | 41  | 1 |                    | 1 |
| MV_Schw | G | 7745 | 140 | 1 | 0.986363032184908  |   |
| MV_Schw | C | 7746 | 110 | 1 | 0.789229943133706  |   |
| MV_Schw | T | 7747 | 149 | 1 | 0.88950624150852   |   |
| MV_Schw | G | 7748 | 143 | 3 |                    | 1 |
| MV_Schw | A | 7749 | 85  | 0 | 0.648224297390367  |   |
| MV_Schw | A | 7750 | 35  | 0 |                    | 1 |
| MV_Schw | G | 7751 | 124 | 3 |                    | 1 |
| MV_Schw | A | 7752 | 31  | 1 | 0.791667533131283  |   |
| MV_Schw | G | 7753 | 62  | 1 |                    | 1 |
| MV_Schw | C | 7754 | 188 | 1 | 0.542247232322076  |   |
| MV_Schw | T | 7755 | 14  | 0 |                    | 1 |
| MV_Schw | C | 7756 | 448 | 8 |                    | 1 |
| MV_Schw | A | 7757 | 12  | 0 |                    | 1 |
| MV_Schw | T | 7758 | 87  | 0 | 0.653463094391213  |   |
| MV_Schw | G | 7759 | 19  | 1 |                    | 1 |
| MV_Schw | A | 7760 | 23  | 3 | 0.0223014517289088 |   |
| MV_Schw | A | 7761 | 14  | 1 | 0.944879389258477  |   |
| MV_Schw | T | 7762 | 17  | 0 |                    | 1 |
| MV_Schw | G | 7763 | 60  | 0 | 0.957721317456694  |   |
| MV_Schw | C | 7764 | 23  | 0 |                    | 1 |
| MV_Schw | A | 7765 | 25  | 1 | 0.704667204683568  |   |
| MV_Schw | T | 7766 | 12  | 0 |                    | 1 |
| MV_Schw | T | 7767 | 25  | 0 |                    | 1 |
| MV_Schw | G | 7768 | 149 | 2 |                    | 1 |
| MV_Schw | G | 7769 | 186 | 3 |                    | 1 |
| MV_Schw | T | 7770 | 10  | 0 |                    | 1 |
| MV_Schw | G | 7771 | 101 | 1 |                    | 1 |
| MV_Schw | A | 7772 | 6   | 0 |                    | 1 |
| MV_Schw | A | 7773 | 33  | 0 |                    | 1 |
| MV_Schw | C | 7774 | 370 | 8 |                    | 1 |

|         |   |      |     |   |                   |   |
|---------|---|------|-----|---|-------------------|---|
| MV_Schw | T | 7775 | 4   | 0 |                   | 1 |
| MV_Schw | C | 7776 | 54  | 1 |                   | 1 |
| MV_Schw | A | 7777 | 14  | 0 |                   | 1 |
| MV_Schw | A | 7778 | 8   | 0 |                   | 1 |
| MV_Schw | C | 7779 | 151 | 3 |                   | 1 |
| MV_Schw | T | 7780 | 6   | 0 |                   | 1 |
| MV_Schw | C | 7781 | 29  | 1 |                   | 1 |
| MV_Schw | T | 7782 | 4   | 0 |                   | 1 |
| MV_Schw | A | 7783 | 8   | 0 |                   | 1 |
| MV_Schw | C | 7784 | 167 | 2 |                   | 1 |
| MV_Schw | T | 7785 | 14  | 0 |                   | 1 |
| MV_Schw | G | 7786 | 85  | 0 | 0.648224297390367 |   |
| MV_Schw | G | 7787 | 10  | 0 |                   | 1 |
| MV_Schw | A | 7788 | 4   | 0 |                   | 1 |
| MV_Schw | G | 7789 | 122 | 1 |                   | 1 |
| MV_Schw | A | 7790 | 21  | 0 |                   | 1 |
| MV_Schw | C | 7791 | 70  | 0 | 0.789229943133706 |   |
| MV_Schw | C | 7792 | 21  | 1 |                   | 1 |
| MV_Schw | A | 7793 | 48  | 1 |                   | 1 |
| MV_Schw | G | 7794 | 314 | 3 | 0.648224297390367 |   |
| MV_Schw | A | 7795 | 25  | 1 |                   | 1 |
| MV_Schw | A | 7796 | 45  | 2 | 0.65158773158174  |   |
| MV_Schw | C | 7797 | 172 | 1 | 0.789229943133706 |   |
| MV_Schw | A | 7798 | 31  | 1 |                   | 1 |
| MV_Schw | A | 7799 | 4   | 0 |                   | 1 |
| MV_Schw | C | 7800 | 85  | 1 |                   | 1 |
| MV_Schw | C | 7801 | 79  | 1 |                   | 1 |
| MV_Schw | A | 7802 | 23  | 1 |                   | 1 |
| MV_Schw | A | 7803 | 107 | 1 | 0.945767847051808 |   |
| MV_Schw | T | 7804 | 52  | 1 |                   | 1 |
| MV_Schw | C | 7805 | 25  | 0 |                   | 1 |
| MV_Schw | A | 7806 | 14  | 1 | 0.944879389258477 |   |
| MV_Schw | G | 7807 | 72  | 0 | 0.791667533131283 |   |
| MV_Schw | T | 7808 | 6   | 1 | 0.704667204683568 |   |
| MV_Schw | T | 7809 | 31  | 0 |                   | 1 |
| MV_Schw | C | 7810 | 64  | 1 |                   | 1 |

|         |   |      |     |    |                    |   |
|---------|---|------|-----|----|--------------------|---|
| MV_Schw | C | 7811 | 45  | 1  |                    | 1 |
| MV_Schw | T | 7812 | 16  | 1  | 0.483965165529824  |   |
| MV_Schw | A | 7813 | 41  | 1  |                    | 1 |
| MV_Schw | G | 7814 | 110 | 1  |                    | 1 |
| MV_Schw | C | 7815 | 64  | 2  |                    | 1 |
| MV_Schw | T | 7816 | 14  | 0  |                    | 1 |
| MV_Schw | G | 7817 | 27  | 1  |                    | 1 |
| MV_Schw | T | 7818 | 4   | 0  |                    | 1 |
| MV_Schw | C | 7819 | 273 | 3  | 0.944879389258477  |   |
| MV_Schw | T | 7820 | 4   | 0  |                    | 1 |
| MV_Schw | C | 7821 | 74  | 1  |                    | 1 |
| MV_Schw | A | 7822 | 10  | 0  |                    | 1 |
| MV_Schw | A | 7823 | 37  | 1  | 0.88950624150852   |   |
| MV_Schw | A | 7824 | 74  | 0  | 0.795198078226602  |   |
| MV_Schw | G | 7825 | 320 | 3  | 0.346363438943306  |   |
| MV_Schw | G | 7826 | 151 | 1  | 0.553693656798976  |   |
| MV_Schw | G | 7827 | 64  | 2  |                    | 1 |
| MV_Schw | A | 7828 | 19  | 0  |                    | 1 |
| MV_Schw | A | 7829 | 31  | 0  |                    | 1 |
| MV_Schw | A | 7830 | 8   | 1  | 0.258627633593378  |   |
| MV_Schw | C | 7831 | 126 | 2  |                    | 1 |
| MV_Schw | T | 7832 | 21  | 1  |                    | 1 |
| MV_Schw | G | 7833 | 37  | 1  |                    | 1 |
| MV_Schw | C | 7834 | 285 | 4  |                    | 1 |
| MV_Schw | T | 7835 | 93  | 2  |                    | 1 |
| MV_Schw | C | 7836 | 140 | 3  |                    | 1 |
| MV_Schw | A | 7837 | 37  | 1  |                    | 1 |
| MV_Schw | G | 7838 | 83  | 4  | 0.311085536765447  |   |
| MV_Schw | G | 7839 | 45  | 1  |                    | 1 |
| MV_Schw | G | 7840 | 141 | 4  |                    | 1 |
| MV_Schw | C | 7841 | 91  | 3  |                    | 1 |
| MV_Schw | C | 7842 | 31  | 2  | 0.428411386231373  |   |
| MV_Schw | C | 7843 | 23  | 1  | 0.658415249679101  |   |
| MV_Schw | A | 7844 | 60  | 1  |                    | 1 |
| MV_Schw | C | 7845 | 225 | 10 | 0.0975104748468945 |   |
| MV_Schw | T | 7846 | 29  | 1  |                    | 1 |

|         |   |      |     |   |                     |
|---------|---|------|-----|---|---------------------|
| MV_Schw | A | 7847 | 4   | 0 | 1                   |
| MV_Schw | C | 7848 | 25  | 0 | 1                   |
| MV_Schw | A | 7849 | 2   | 0 | 1                   |
| MV_Schw | A | 7850 | 27  | 5 | 0.00151580398215566 |
| MV_Schw | T | 7851 | 35  | 2 | 0.497615650989996   |
| MV_Schw | C | 7852 | 97  | 6 | 0.053691133210959   |
| MV_Schw | A | 7853 | 12  | 1 | 0.88950624150852    |
| MV_Schw | G | 7854 | 19  | 1 | 1                   |
| MV_Schw | A | 7855 | 66  | 0 | 0.789229943133706   |
| MV_Schw | G | 7856 | 112 | 3 | 1                   |
| MV_Schw | G | 7857 | 68  | 2 | 1                   |
| MV_Schw | T | 7858 | 4   | 0 | 1                   |
| MV_Schw | C | 7859 | 50  | 1 | 1                   |
| MV_Schw | A | 7860 | 16  | 0 | 1                   |
| MV_Schw | A | 7861 | 33  | 0 | 1                   |
| MV_Schw | T | 7862 | 37  | 0 | 1                   |
| MV_Schw | T | 7863 | 39  | 0 | 1                   |
| MV_Schw | C | 7864 | 163 | 3 | 1                   |
| MV_Schw | T | 7865 | 2   | 0 | 1                   |
| MV_Schw | C | 7866 | 66  | 1 | 1                   |
| MV_Schw | A | 7867 | 219 | 4 | 1                   |
| MV_Schw | A | 7868 | 19  | 0 | 1                   |
| MV_Schw | A | 7869 | 37  | 1 | 1                   |
| MV_Schw | C | 7870 | 70  | 1 | 1                   |
| MV_Schw | A | 7871 | 4   | 1 | 0.619556855087002   |
| MV_Schw | T | 7872 | 31  | 1 | 1                   |
| MV_Schw | G | 7873 | 62  | 2 | 0.991517221373143   |
| MV_Schw | T | 7874 | 25  | 1 | 0.704667204683568   |
| MV_Schw | C | 7875 | 79  | 5 | 0.136235544776219   |
| MV_Schw | G | 7876 | 134 | 3 | 1                   |
| MV_Schw | C | 7877 | 386 | 8 | 1                   |
| MV_Schw | T | 7878 | 21  | 1 | 1                   |
| MV_Schw | G | 7879 | 140 | 2 | 1                   |
| MV_Schw | T | 7880 | 6   | 0 | 1                   |
| MV_Schw | C | 7881 | 64  | 1 | 1                   |
| MV_Schw | C | 7882 | 8   | 0 | 1                   |

|         |   |      |     |   |                   |
|---------|---|------|-----|---|-------------------|
| MV_Schw | C | 7883 | 159 | 1 | 0.437783686960654 |
| MV_Schw | T | 7884 | 10  | 1 | 0.822598489333375 |
| MV_Schw | G | 7885 | 85  | 2 | 1                 |
| MV_Schw | T | 7886 | 23  | 0 | 1                 |
| MV_Schw | T | 7887 | 25  | 1 | 1                 |
| MV_Schw | A | 7888 | 0   | 0 | 1                 |
| MV_Schw | G | 7889 | 35  | 0 | 1                 |
| MV_Schw | A | 7890 | 2   | 0 | 1                 |
| MV_Schw | C | 7891 | 153 | 2 | 1                 |
| MV_Schw | T | 7892 | 14  | 0 | 1                 |
| MV_Schw | T | 7893 | 6   | 0 | 1                 |
| MV_Schw | G | 7894 | 17  | 0 | 1                 |
| MV_Schw | T | 7895 | 2   | 0 | 1                 |
| MV_Schw | A | 7896 | 25  | 0 | 1                 |
| MV_Schw | T | 7897 | 43  | 0 | 1                 |
| MV_Schw | T | 7898 | 2   | 0 | 1                 |
| MV_Schw | T | 7899 | 2   | 0 | 1                 |
| MV_Schw | A | 7900 | 10  | 0 | 1                 |
| MV_Schw | G | 7901 | 35  | 1 | 1                 |
| MV_Schw | G | 7902 | 167 | 3 | 1                 |
| MV_Schw | T | 7903 | 25  | 1 | 1                 |
| MV_Schw | C | 7904 | 246 | 3 | 0.99714335546853  |
| MV_Schw | G | 7905 | 35  | 1 | 0.863499923807603 |
| MV_Schw | A | 7906 | 16  | 0 | 1                 |
| MV_Schw | G | 7907 | 112 | 1 | 0.789229943133706 |
| MV_Schw | G | 7908 | 233 | 7 | 0.893476965465588 |
| MV_Schw | T | 7909 | 70  | 2 | 1                 |
| MV_Schw | T | 7910 | 8   | 0 | 1                 |
| MV_Schw | A | 7911 | 14  | 0 | 1                 |
| MV_Schw | C | 7912 | 167 | 3 | 1                 |
| MV_Schw | A | 7913 | 25  | 2 | 0.314611398059001 |
| MV_Schw | A | 7914 | 35  | 1 | 1                 |
| MV_Schw | T | 7915 | 31  | 0 | 1                 |
| MV_Schw | G | 7916 | 72  | 1 | 1                 |
| MV_Schw | T | 7917 | 8   | 0 | 1                 |
| MV_Schw | G | 7918 | 163 | 3 | 1                 |

|         |    |      |     |    |                   |    |
|---------|----|------|-----|----|-------------------|----|
| MV_Schw | T  | 7919 | 19  | 1  |                   | 1  |
| MV_Schw | C  | 7920 | 200 | 2  | 0.822598489333375 |    |
| MV_Schw | A  | 7921 | 33  | 1  |                   | 1  |
| MV_Schw | T  | 7922 | 79  | 2  |                   | 1  |
| MV_Schw | C  | 7923 | 29  | 1  |                   | 1  |
| MV_Schw | T  | 7924 | 43  | 1  |                   | 1  |
| MV_Schw | A  | 7925 | 21  | 0  |                   | 1  |
| MV_Schw | T  | 7926 | 14  | 0  |                   | 1  |
| MV_Schw | A  | 7927 | 41  | 1  | 0.945767847051808 |    |
| MV_Schw | G  | 7928 | 147 | 3  |                   | 1  |
| MV_Schw | T  | 7929 | 4   | 0  |                   | 1  |
| MV_Schw | C  | 7930 | 10  | 0  |                   | 1  |
| MV_Schw | A  | 7931 | 27  | 0  |                   | 1  |
| MV_Schw | C  | 7932 | 74  | 1  |                   | 1  |
| MV_Schw | T  | 7933 | 43  | 0  |                   | 1  |
| MV_Schw | A  | 7934 | 66  | 0  | 0.789229943133706 |    |
| MV_Schw | T  | 7935 | 72  | 1  |                   | 1  |
| MV_Schw | G  | 7936 | 16  | 0  |                   | 1  |
| MV_Schw | NA | 7937 | 0   | 0  |                   | NA |
| MV_Schw | C  | 7938 | 37  | 1  | 0.88950624150852  |    |
| MV_Schw | A  | 7939 | 10  | 1  | 0.307480793677112 |    |
| MV_Schw | T  | 7940 | 14  | 0  |                   | 1  |
| MV_Schw | C  | 7941 | 48  | 1  |                   | 1  |
| MV_Schw | C  | 7942 | 54  | 1  |                   | 1  |
| MV_Schw | C  | 7943 | 110 | 3  |                   | 1  |
| MV_Schw | A  | 7944 | 120 | 3  |                   | 1  |
| MV_Schw | G  | 7945 | 428 | 13 | 0.619556855087002 |    |
| MV_Schw | G  | 7946 | 130 | 3  |                   | 1  |
| MV_Schw | G  | 7947 | 41  | 2  | 0.599534349993353 |    |
| MV_Schw | A  | 7948 | 8   | 0  |                   | 1  |
| MV_Schw | A  | 7949 | 8   | 0  |                   | 1  |
| MV_Schw | T  | 7950 | 25  | 2  | 0.314611398059001 |    |
| MV_Schw | G  | 7951 | 72  | 4  | 0.222002676269896 |    |
| MV_Schw | T  | 7952 | 17  | 0  |                   | 1  |
| MV_Schw | A  | 7953 | 21  | 0  |                   | 1  |
| MV_Schw | T  | 7954 | 29  | 1  | 0.789229943133706 |    |

|         |   |      |     |    |                    |   |
|---------|---|------|-----|----|--------------------|---|
| MV_Schw | G | 7955 | 124 | 1  |                    | 1 |
| MV_Schw | G | 7956 | 547 | 15 | 0.789229943133706  |   |
| MV_Schw | G | 7957 | 217 | 3  |                    | 1 |
| MV_Schw | G | 7958 | 116 | 0  | 0.296710762771661  |   |
| MV_Schw | G | 7959 | 120 | 4  | 0.813457243243208  |   |
| MV_Schw | A | 7960 | 29  | 0  |                    | 1 |
| MV_Schw | A | 7961 | 19  | 0  |                    | 1 |
| MV_Schw | C | 7962 | 155 | 4  |                    | 1 |
| MV_Schw | T | 7963 | 8   | 0  |                    | 1 |
| MV_Schw | T | 7964 | 8   | 0  |                    | 1 |
| MV_Schw | A | 7965 | 23  | 2  | 0.296710762771661  |   |
| MV_Schw | C | 7966 | 79  | 2  |                    | 1 |
| MV_Schw | C | 7967 | 25  | 0  |                    | 1 |
| MV_Schw | T | 7968 | 10  | 0  |                    | 1 |
| MV_Schw | A | 7969 | 8   | 0  |                    | 1 |
| MV_Schw | G | 7970 | 66  | 5  | 0.0239036682558459 |   |
| MV_Schw | T | 7971 | 25  | 0  |                    | 1 |
| MV_Schw | G | 7972 | 138 | 5  | 0.426789350155389  |   |
| MV_Schw | G | 7973 | 184 | 3  |                    | 1 |
| MV_Schw | A | 7974 | 27  | 1  |                    | 1 |
| MV_Schw | A | 7975 | 12  | 1  | 0.88950624150852   |   |
| MV_Schw | A | 7976 | 19  | 0  |                    | 1 |
| MV_Schw | A | 7977 | 17  | 2  | 0.190596323698557  |   |
| MV_Schw | G | 7978 | 172 | 1  | 0.342651296301386  |   |
| MV_Schw | C | 7979 | 79  | 2  |                    | 1 |
| MV_Schw | C | 7980 | 83  | 3  | 0.897349285586955  |   |
| MV_Schw | T | 7981 | 2   | 0  |                    | 1 |
| MV_Schw | A | 7982 | 33  | 0  |                    | 1 |
| MV_Schw | A | 7983 | 27  | 1  |                    | 1 |
| MV_Schw | T | 7984 | 8   | 1  | 0.789229943133706  |   |
| MV_Schw | C | 7985 | 56  | 0  | 0.950262622850522  |   |
| MV_Schw | T | 7986 | 41  | 1  | 0.945767847051808  |   |
| MV_Schw | G | 7987 | 35  | 1  | 0.863499923807603  |   |
| MV_Schw | A | 7988 | 21  | 0  |                    | 1 |
| MV_Schw | G | 7989 | 242 | 5  |                    | 1 |
| MV_Schw | C | 7990 | 33  | 1  |                    | 1 |

|         |   |      |     |   |                   |   |
|---------|---|------|-----|---|-------------------|---|
| MV_Schw | A | 7991 | 12  | 0 |                   | 1 |
| MV_Schw | G | 7992 | 107 | 2 |                   | 1 |
| MV_Schw | C | 7993 | 116 | 2 |                   | 1 |
| MV_Schw | A | 7994 | 60  | 1 |                   | 1 |
| MV_Schw | A | 7995 | 47  | 0 |                   | 1 |
| MV_Schw | A | 7996 | 4   | 0 |                   | 1 |
| MV_Schw | A | 7997 | 25  | 1 | 0.704667204683568 |   |
| MV_Schw | G | 7998 | 35  | 1 |                   | 1 |
| MV_Schw | G | 7999 | 178 | 1 | 0.648224297390367 |   |
| MV_Schw | T | 8000 | 4   | 0 |                   | 1 |
| MV_Schw | C | 8001 | 132 | 2 |                   | 1 |
| MV_Schw | A | 8002 | 27  | 0 |                   | 1 |
| MV_Schw | G | 8003 | 79  | 3 | 0.882548734849042 |   |
| MV_Schw | A | 8004 | 35  | 0 |                   | 1 |
| MV_Schw | G | 8005 | 83  | 1 |                   | 1 |
| MV_Schw | T | 8006 | 8   | 1 | 0.789229943133706 |   |
| MV_Schw | T | 8007 | 16  | 0 |                   | 1 |
| MV_Schw | G | 8008 | 211 | 5 |                   | 1 |
| MV_Schw | T | 8009 | 103 | 2 |                   | 1 |
| MV_Schw | C | 8010 | 188 | 3 |                   | 1 |
| MV_Schw | A | 8011 | 41  | 0 |                   | 1 |
| MV_Schw | C | 8012 | 145 | 2 |                   | 1 |
| MV_Schw | A | 8013 | 19  | 0 |                   | 1 |
| MV_Schw | A | 8014 | 10  | 0 |                   | 1 |
| MV_Schw | C | 8015 | 66  | 1 |                   | 1 |
| MV_Schw | T | 8016 | 118 | 0 | 0.296802961873227 |   |
| MV_Schw | G | 8017 | 10  | 0 |                   | 1 |
| MV_Schw | A | 8018 | 16  | 0 |                   | 1 |
| MV_Schw | G | 8019 | 161 | 3 |                   | 1 |
| MV_Schw | C | 8020 | 56  | 1 |                   | 1 |
| MV_Schw | A | 8021 | 6   | 0 |                   | 1 |
| MV_Schw | T | 8022 | 14  | 0 |                   | 1 |
| MV_Schw | G | 8023 | 29  | 1 | 0.789229943133706 |   |
| MV_Schw | T | 8024 | 8   | 0 |                   | 1 |
| MV_Schw | A | 8025 | 58  | 1 |                   | 1 |
| MV_Schw | C | 8026 | 74  | 1 |                   | 1 |



|         |   |      |     |    |                   |   |
|---------|---|------|-----|----|-------------------|---|
| MV_Schw | C | 8027 | 70  | 1  |                   | 1 |
| MV_Schw | G | 8028 | 76  | 1  |                   | 1 |
| MV_Schw | A | 8029 | 37  | 1  |                   | 1 |
| MV_Schw | G | 8030 | 62  | 3  | 0.57780206681461  |   |
| MV_Schw | T | 8031 | 14  | 0  |                   | 1 |
| MV_Schw | G | 8032 | 347 | 5  | 0.897349285586955 |   |
| MV_Schw | T | 8033 | 33  | 1  |                   | 1 |
| MV_Schw | T | 8034 | 12  | 1  | 0.88950624150852  |   |
| MV_Schw | T | 8035 | 25  | 1  |                   | 1 |
| MV_Schw | G | 8036 | 79  | 1  |                   | 1 |
| MV_Schw | A | 8037 | 4   | 0  |                   | 1 |
| MV_Schw | A | 8038 | 66  | 1  |                   | 1 |
| MV_Schw | G | 8039 | 47  | 3  | 0.366637777073510 |   |
| MV_Schw | T | 8040 | 4   | 1  | 0.619556855087002 |   |
| MV_Schw | A | 8041 | 4   | 0  |                   | 1 |
| MV_Schw | G | 8042 | 21  | 1  | 0.632968068765344 |   |
| MV_Schw | G | 8043 | 66  | 0  | 0.789229943133706 |   |
| MV_Schw | T | 8044 | 4   | 1  | 0.136107188572645 |   |
| MV_Schw | G | 8045 | 33  | 1  | 0.822598489333375 |   |
| MV_Schw | T | 8046 | 2   | 0  |                   | 1 |
| MV_Schw | T | 8047 | 4   | 0  |                   | 1 |
| MV_Schw | A | 8048 | 47  | 0  |                   | 1 |
| MV_Schw | T | 8049 | 31  | 1  |                   | 1 |
| MV_Schw | C | 8050 | 393 | 15 | 0.107602198195001 |   |
| MV_Schw | A | 8051 | 37  | 0  |                   | 1 |
| MV_Schw | G | 8052 | 60  | 1  |                   | 1 |
| MV_Schw | A | 8053 | 4   | 1  | 0.619556855087002 |   |
| MV_Schw | A | 8054 | 17  | 0  |                   | 1 |
| MV_Schw | A | 8055 | 19  | 1  | 0.57780206681461  |   |
| MV_Schw | T | 8056 | 54  | 1  |                   | 1 |
| MV_Schw | C | 8057 | 97  | 4  | 0.550155392537109 |   |
| MV_Schw | C | 8058 | 64  | 1  |                   | 1 |
| MV_Schw | G | 8059 | 200 | 7  | 0.595588876895851 |   |
| MV_Schw | G | 8060 | 161 | 1  | 0.440157375549872 |   |
| MV_Schw | G | 8061 | 165 | 1  | 0.786994490087255 |   |
| MV_Schw | T | 8062 | 19  | 1  | 0.57780206681461  |   |

|         |   |      |     |    |                    |   |
|---------|---|------|-----|----|--------------------|---|
| MV_Schw | T | 8063 | 31  | 0  |                    | 1 |
| MV_Schw | T | 8064 | 14  | 1  | 0.944879389258477  |   |
| MV_Schw | G | 8065 | 477 | 15 | 0.287207122421622  |   |
| MV_Schw | G | 8066 | 151 | 3  |                    | 1 |
| MV_Schw | G | 8067 | 242 | 9  | 0.253646130769608  |   |
| MV_Schw | G | 8068 | 45  | 1  |                    | 1 |
| MV_Schw | G | 8069 | 16  | 0  |                    | 1 |
| MV_Schw | C | 8070 | 304 | 13 | 0.0318151793880359 |   |
| MV_Schw | T | 8071 | 39  | 1  |                    | 1 |
| MV_Schw | C | 8072 | 140 | 2  |                    | 1 |
| MV_Schw | C | 8073 | 215 | 6  | 0.88950624150852   |   |
| MV_Schw | G | 8074 | 72  | 1  |                    | 1 |
| MV_Schw | G | 8075 | 118 | 1  |                    | 1 |
| MV_Schw | T | 8076 | 12  | 0  |                    | 1 |
| MV_Schw | G | 8077 | 163 | 7  | 0.275653222293987  |   |
| MV_Schw | T | 8078 | 0   | 0  |                    | 1 |
| MV_Schw | T | 8079 | 4   | 1  | 0.136107188572645  |   |
| MV_Schw | C | 8080 | 43  | 0  |                    | 1 |
| MV_Schw | C | 8081 | 105 | 2  |                    | 1 |
| MV_Schw | A | 8082 | 14  | 0  |                    | 1 |
| MV_Schw | T | 8083 | 16  | 0  |                    | 1 |
| MV_Schw | A | 8084 | 8   | 0  |                    | 1 |
| MV_Schw | T | 8085 | 37  | 0  |                    | 1 |
| MV_Schw | G | 8086 | 31  | 0  |                    | 1 |
| MV_Schw | A | 8087 | 4   | 0  |                    | 1 |
| MV_Schw | C | 8088 | 58  | 1  |                    | 1 |
| MV_Schw | A | 8089 | 33  | 0  |                    | 1 |
| MV_Schw | A | 8090 | 14  | 0  |                    | 1 |
| MV_Schw | A | 8091 | 16  | 1  | 0.950262622850522  |   |
| MV_Schw | C | 8092 | 79  | 1  |                    | 1 |
| MV_Schw | T | 8093 | 4   | 0  |                    | 1 |
| MV_Schw | A | 8094 | 39  | 0  |                    | 1 |
| MV_Schw | T | 8095 | 23  | 1  | 0.658415249679101  |   |
| MV_Schw | C | 8096 | 110 | 1  | 0.789229943133706  |   |
| MV_Schw | T | 8097 | 10  | 0  |                    | 1 |
| MV_Schw | T | 8098 | 39  | 0  |                    | 1 |

|         |   |      |     |   |                   |   |
|---------|---|------|-----|---|-------------------|---|
| MV_Schw | G | 8099 | 68  | 1 |                   | 1 |
| MV_Schw | A | 8100 | 19  | 0 |                   | 1 |
| MV_Schw | G | 8101 | 62  | 0 | 0.789229943133706 |   |
| MV_Schw | C | 8102 | 153 | 2 |                   | 1 |
| MV_Schw | A | 8103 | 8   | 0 |                   | 1 |
| MV_Schw | A | 8104 | 8   | 0 |                   | 1 |
| MV_Schw | C | 8105 | 78  | 5 | 0.124962268582404 |   |
| MV_Schw | C | 8106 | 87  | 2 |                   | 1 |
| MV_Schw | A | 8107 | 31  | 1 | 0.791667533131283 |   |
| MV_Schw | G | 8108 | 126 | 2 |                   | 1 |
| MV_Schw | T | 8109 | 21  | 1 |                   | 1 |
| MV_Schw | C | 8110 | 66  | 0 | 0.789229943133706 |   |
| MV_Schw | A | 8111 | 48  | 0 | 0.950262622850522 |   |
| MV_Schw | G | 8112 | 132 | 2 |                   | 1 |
| MV_Schw | T | 8113 | 21  | 1 |                   | 1 |
| MV_Schw | A | 8114 | 21  | 0 |                   | 1 |
| MV_Schw | A | 8115 | 19  | 1 | 0.57780206681461  |   |
| MV_Schw | T | 8116 | 25  | 1 |                   | 1 |
| MV_Schw | G | 8117 | 39  | 1 |                   | 1 |
| MV_Schw | A | 8118 | 33  | 0 |                   | 1 |
| MV_Schw | T | 8119 | 29  | 0 |                   | 1 |
| MV_Schw | C | 8120 | 132 | 1 | 0.983041048229953 |   |
| MV_Schw | T | 8121 | 21  | 0 |                   | 1 |
| MV_Schw | C | 8122 | 176 | 2 |                   | 1 |
| MV_Schw | A | 8123 | 103 | 1 | 0.944879389258477 |   |
| MV_Schw | G | 8124 | 141 | 3 |                   | 1 |
| MV_Schw | C | 8125 | 107 | 0 | 0.380027812845055 |   |
| MV_Schw | A | 8126 | 35  | 1 |                   | 1 |
| MV_Schw | A | 8127 | 12  | 0 |                   | 1 |
| MV_Schw | C | 8128 | 27  | 0 |                   | 1 |
| MV_Schw | T | 8129 | 12  | 0 |                   | 1 |
| MV_Schw | G | 8130 | 27  | 1 | 0.752394317790241 |   |
| MV_Schw | T | 8131 | 0   | 0 |                   | 1 |
| MV_Schw | A | 8132 | 10  | 0 |                   | 1 |
| MV_Schw | T | 8133 | 6   | 0 |                   | 1 |
| MV_Schw | G | 8134 | 31  | 1 |                   | 1 |

|         |    |      |     |    |                    |    |
|---------|----|------|-----|----|--------------------|----|
| MV_Schw | G  | 8135 | 64  | 0  | 0.789229943133706  |    |
| MV_Schw | T  | 8136 | 12  | 0  |                    | 1  |
| MV_Schw | G  | 8137 | 33  | 1  |                    | 1  |
| MV_Schw | G  | 8138 | 163 | 3  |                    | 1  |
| MV_Schw | C  | 8139 | 171 | 3  |                    | 1  |
| MV_Schw | T  | 8140 | 58  | 0  | 0.953489044526869  |    |
| MV_Schw | T  | 8141 | 19  | 0  |                    | 1  |
| MV_Schw | T  | 8142 | 29  | 0  |                    | 1  |
| MV_Schw | G  | 8143 | 81  | 4  | 0.305908359426921  |    |
| MV_Schw | G  | 8144 | 48  | 1  |                    | 1  |
| MV_Schw | G  | 8145 | 508 | 11 |                    | 1  |
| MV_Schw | G  | 8146 | 19  | 1  |                    | 1  |
| MV_Schw | G  | 8147 | 10  | 0  |                    | 1  |
| MV_Schw | NA | 8148 | 0   | 0  |                    | NA |
| MV_Schw | G  | 8149 | 64  | 2  |                    | 1  |
| MV_Schw | C  | 8150 | 147 | 5  | 0.588971267353346  |    |
| MV_Schw | T  | 8151 | 14  | 1  | 0.944879389258477  |    |
| MV_Schw | C  | 8152 | 89  | 2  |                    | 1  |
| MV_Schw | A  | 8153 | 14  | 1  | 0.944879389258477  |    |
| MV_Schw | A  | 8154 | 21  | 1  |                    | 1  |
| MV_Schw | A  | 8155 | 8   | 0  |                    | 1  |
| MV_Schw | C  | 8156 | 184 | 2  | 0.947544583923452  |    |
| MV_Schw | T  | 8157 | 6   | 0  |                    | 1  |
| MV_Schw | C  | 8158 | 43  | 1  | 0.950262622850522  |    |
| MV_Schw | G  | 8159 | 91  | 5  | 0.0982183359341293 |    |
| MV_Schw | C  | 8160 | 626 | 16 | 0.824239311674942  |    |
| MV_Schw | A  | 8161 | 118 | 5  | 0.491835918445353  |    |
| MV_Schw | G  | 8162 | 74  | 3  | 0.44280652126772   |    |
| MV_Schw | C  | 8163 | 31  | 1  |                    | 1  |
| MV_Schw | C  | 8164 | 21  | 1  | 0.632968068765344  |    |
| MV_Schw | C  | 8165 | 41  | 1  | 0.945767847051808  |    |
| MV_Schw | T  | 8166 | 45  | 3  | 0.340185031164498  |    |
| MV_Schw | T  | 8167 | 6   | 0  |                    | 1  |
| MV_Schw | T  | 8168 | 12  | 0  |                    | 1  |
| MV_Schw | G  | 8169 | 401 | 15 | 0.118110625222658  |    |
| MV_Schw | T  | 8170 | 12  | 0  |                    | 1  |

|         |   |      |     |   |                   |
|---------|---|------|-----|---|-------------------|
| MV_Schw | C | 8171 | 99  | 3 | 0.789229943133706 |
| MV_Schw | A | 8172 | 72  | 3 | 0.822598489333375 |
| MV_Schw | C | 8173 | 89  | 1 | 1                 |
| MV_Schw | G | 8174 | 33  | 1 | 0.822598489333375 |
| MV_Schw | G | 8175 | 89  | 3 | 0.715462436038866 |
| MV_Schw | G | 8176 | 132 | 4 | 0.863499923807603 |
| MV_Schw | G | 8177 | 149 | 1 | 0.550155392537109 |
| MV_Schw | A | 8178 | 6   | 0 | 1                 |
| MV_Schw | A | 8179 | 23  | 0 | 1                 |
| MV_Schw | G | 8180 | 60  | 1 | 1                 |
| MV_Schw | A | 8181 | 39  | 1 | 1                 |
| MV_Schw | T | 8182 | 37  | 1 | 1                 |
| MV_Schw | T | 8183 | 4   | 1 | 0.619556855087002 |
| MV_Schw | C | 8184 | 45  | 0 | 1                 |
| MV_Schw | T | 8185 | 21  | 2 | 0.258627633593378 |
| MV_Schw | A | 8186 | 33  | 0 | 1                 |
| MV_Schw | T | 8187 | 83  | 0 | 0.645428736569362 |
| MV_Schw | C | 8188 | 74  | 2 | 1                 |
| MV_Schw | A | 8189 | 6   | 0 | 1                 |
| MV_Schw | C | 8190 | 87  | 2 | 1                 |
| MV_Schw | A | 8191 | 6   | 0 | 1                 |
| MV_Schw | A | 8192 | 25  | 1 | 1                 |
| MV_Schw | T | 8193 | 10  | 0 | 1                 |
| MV_Schw | T | 8194 | 10  | 0 | 1                 |
| MV_Schw | C | 8195 | 33  | 0 | 1                 |
| MV_Schw | C | 8196 | 8   | 0 | 1                 |
| MV_Schw | C | 8197 | 29  | 0 | 1                 |
| MV_Schw | T | 8198 | 6   | 0 | 1                 |
| MV_Schw | A | 8199 | 8   | 1 | 0.258627633593378 |
| MV_Schw | T | 8200 | 2   | 0 | 1                 |
| MV_Schw | C | 8201 | 101 | 1 | 0.944879389258477 |
| MV_Schw | A | 8202 | 4   | 0 | 1                 |
| MV_Schw | G | 8203 | 23  | 0 | 1                 |
| MV_Schw | G | 8204 | 19  | 1 | 1                 |
| MV_Schw | G | 8205 | 21  | 0 | 1                 |
| MV_Schw | A | 8206 | 16  | 0 | 1                 |

|         |    |      |     |   |                   |    |
|---------|----|------|-----|---|-------------------|----|
| MV_Schw | T  | 8207 | 17  | 0 |                   | 1  |
| MV_Schw | C  | 8208 | 17  | 0 |                   | 1  |
| MV_Schw | A  | 8209 | 12  | 1 | 0.88950624150852  |    |
| MV_Schw | G  | 8210 | 97  | 5 | 0.259232568936535 |    |
| MV_Schw | G  | 8211 | 29  | 1 | 0.789229943133706 |    |
| MV_Schw | G  | 8212 | 163 | 2 |                   | 1  |
| MV_Schw | A  | 8213 | 29  | 0 |                   | 1  |
| MV_Schw | A  | 8214 | 8   | 0 |                   | 1  |
| MV_Schw | A  | 8215 | 6   | 0 |                   | 1  |
| MV_Schw | G  | 8216 | 21  | 0 |                   | 1  |
| MV_Schw | G  | 8217 | 16  | 1 | 0.950262622850522 |    |
| MV_Schw | T  | 8218 | 4   | 1 | 0.619556855087002 |    |
| MV_Schw | G  | 8219 | 397 | 6 |                   | 1  |
| MV_Schw | T  | 8220 | 95  | 0 | 0.499662168427985 |    |
| MV_Schw | C  | 8221 | 85  | 1 |                   | 1  |
| MV_Schw | A  | 8222 | 41  | 1 |                   | 1  |
| MV_Schw | G  | 8223 | 64  | 2 |                   | 1  |
| MV_Schw | C  | 8224 | 68  | 1 |                   | 1  |
| MV_Schw | T  | 8225 | 39  | 1 |                   | 1  |
| MV_Schw | T  | 8226 | 52  | 0 | 0.950262622850522 |    |
| MV_Schw | C  | 8227 | 50  | 1 |                   | 1  |
| MV_Schw | C  | 8228 | 87  | 1 |                   | 1  |
| MV_Schw | A  | 8229 | 54  | 2 | 0.789229943133706 |    |
| MV_Schw | G  | 8230 | 120 | 1 | 0.789229943133706 |    |
| MV_Schw | C  | 8231 | 56  | 0 | 0.950262622850522 |    |
| MV_Schw | T  | 8232 | 8   | 0 |                   | 1  |
| MV_Schw | C  | 8233 | 169 | 3 |                   | 1  |
| MV_Schw | G  | 8234 | 105 | 4 | 0.603755373639587 |    |
| MV_Schw | T  | 8235 | 47  | 1 |                   | 1  |
| MV_Schw | C  | 8236 | 33  | 0 |                   | 1  |
| MV_Schw | A  | 8237 | 35  | 1 | 0.863499923807603 |    |
| MV_Schw | A  | 8238 | 21  | 0 |                   | 1  |
| MV_Schw | G  | 8239 | 87  | 0 | 0.653463094391213 |    |
| MV_Schw | C  | 8240 | 52  | 1 |                   | 1  |
| MV_Schw | T  | 8241 | 27  | 0 |                   | 1  |
| MV_Schw | NA | 8242 | 0   | 0 |                   | NA |

|         |    |      |     |    |                   |
|---------|----|------|-----|----|-------------------|
| MV_Schw | G  | 8243 | 17  | 1  | 0.528591092326266 |
| MV_Schw | G  | 8244 | 41  | 3  | 0.297586725038221 |
| MV_Schw | T  | 8245 | 6   | 0  | 1                 |
| MV_Schw | G  | 8246 | 16  | 0  | 1                 |
| MV_Schw | T  | 8247 | 4   | 0  | 1                 |
| MV_Schw | C  | 8248 | 62  | 1  | 1                 |
| MV_Schw | T  | 8249 | 174 | 1  | 0.344829637188882 |
| MV_Schw | G  | 8250 | 326 | 6  | 1                 |
| MV_Schw | G  | 8251 | 246 | 7  | 0.932419855572388 |
| MV_Schw | A  | 8252 | 37  | 0  | 1                 |
| MV_Schw | A  | 8253 | 23  | 0  | 1                 |
| MV_Schw | A  | 8254 | 37  | 1  | 1                 |
| MV_Schw | T  | 8255 | 29  | 0  | 1                 |
| MV_Schw | C  | 8256 | 281 | 10 | 0.308038546605154 |
| MV_Schw | C  | 8257 | 50  | 1  | 1                 |
| MV_Schw | C  | 8258 | 244 | 2  | 0.528591092326266 |
| MV_Schw | C  | 8259 | 68  | 1  | 1                 |
| MV_Schw | A  | 8260 | 85  | 3  | 0.918952129071198 |
| MV_Schw | A  | 8261 | 17  | 0  | 1                 |
| MV_Schw | C  | 8262 | 436 | 9  | 1                 |
| MV_Schw | C  | 8263 | 52  | 1  | 1                 |
| MV_Schw | G  | 8264 | 43  | 1  | 1                 |
| MV_Schw | NA | 8265 | 0   | 0  | NA                |
| MV_Schw | C  | 8266 | 74  | 2  | 1                 |
| MV_Schw | A  | 8267 | 50  | 1  | 1                 |
| MV_Schw | T  | 8268 | 35  | 0  | 1                 |
| MV_Schw | G  | 8269 | 52  | 1  | 1                 |
| MV_Schw | C  | 8270 | 16  | 1  | 0.950262622850522 |
| MV_Schw | A  | 8271 | 64  | 2  | 1                 |
| MV_Schw | A  | 8272 | 16  | 1  | 0.483965165529824 |
| MV_Schw | T  | 8273 | 62  | 1  | 1                 |
| MV_Schw | C  | 8274 | 62  | 1  | 1                 |
| MV_Schw | C  | 8275 | 64  | 1  | 1                 |
| MV_Schw | T  | 8276 | 10  | 0  | 1                 |
| MV_Schw | G  | 8277 | 271 | 3  | 0.944879389258477 |
| MV_Schw | G  | 8278 | 145 | 3  | 1                 |

|         |   |      |     |   |                   |
|---------|---|------|-----|---|-------------------|
| MV_Schw | G | 8279 | 56  | 0 | 0.950262622850522 |
| MV_Schw | T | 8280 | 8   | 0 | 1                 |
| MV_Schw | C | 8281 | 6   | 0 | 1                 |
| MV_Schw | C | 8282 | 35  | 0 | 1                 |
| MV_Schw | C | 8283 | 66  | 0 | 0.789229943133706 |
| MV_Schw | C | 8284 | 68  | 0 | 0.789229943133706 |
| MV_Schw | T | 8285 | 29  | 1 | 1                 |
| MV_Schw | T | 8286 | 17  | 0 | 1                 |
| MV_Schw | A | 8287 | 8   | 0 | 1                 |
| MV_Schw | T | 8288 | 4   | 0 | 1                 |
| MV_Schw | C | 8289 | 89  | 1 | 1                 |
| MV_Schw | A | 8290 | 31  | 0 | 1                 |
| MV_Schw | A | 8291 | 6   | 0 | 1                 |
| MV_Schw | C | 8292 | 78  | 0 | 0.638894311640422 |
| MV_Schw | G | 8293 | 266 | 1 | 0.182730995624231 |
| MV_Schw | G | 8294 | 23  | 0 | 1                 |
| MV_Schw | A | 8295 | 14  | 1 | 0.944879389258477 |
| MV_Schw | T | 8296 | 12  | 1 | 0.88950624150852  |
| MV_Schw | G | 8297 | 10  | 0 | 1                 |
| MV_Schw | A | 8298 | 6   | 0 | 1                 |
| MV_Schw | T | 8299 | 10  | 1 | 0.822598489333375 |
| MV_Schw | C | 8300 | 19  | 0 | 1                 |
| MV_Schw | C | 8301 | 93  | 1 | 1                 |
| MV_Schw | A | 8302 | 8   | 1 | 0.258627633593378 |
| MV_Schw | G | 8303 | 236 | 4 | 1                 |
| MV_Schw | T | 8304 | 39  | 1 | 0.9314909603024   |
| MV_Schw | G | 8305 | 45  | 1 | 1                 |
| MV_Schw | A | 8306 | 17  | 0 | 1                 |
| MV_Schw | T | 8307 | 17  | 0 | 1                 |
| MV_Schw | A | 8308 | 83  | 3 | 0.897349285586955 |
| MV_Schw | G | 8309 | 87  | 5 | 0.188346478797688 |
| MV_Schw | A | 8310 | 89  | 2 | 1                 |
| MV_Schw | C | 8311 | 194 | 5 | 0.950262622850522 |
| MV_Schw | A | 8312 | 19  | 1 | 1                 |
| MV_Schw | G | 8313 | 62  | 3 | 0.307480793677112 |
| MV_Schw | G | 8314 | 105 | 3 | 0.950262622850522 |



|         |   |      |     |   |                   |   |
|---------|---|------|-----|---|-------------------|---|
| MV_Schw | C | 8315 | 149 | 1 | 0.88950624150852  |   |
| MV_Schw | T | 8316 | 138 | 5 | 0.426789350155389 |   |
| MV_Schw | T | 8317 | 6   | 0 |                   | 1 |
| MV_Schw | T | 8318 | 27  | 0 |                   | 1 |
| MV_Schw | A | 8319 | 6   | 0 |                   | 1 |
| MV_Schw | C | 8320 | 29  | 0 |                   | 1 |
| MV_Schw | C | 8321 | 74  | 1 |                   | 1 |
| MV_Schw | T | 8322 | 10  | 0 |                   | 1 |
| MV_Schw | C | 8323 | 43  | 0 |                   | 1 |
| MV_Schw | T | 8324 | 14  | 0 |                   | 1 |
| MV_Schw | C | 8325 | 54  | 1 |                   | 1 |
| MV_Schw | A | 8326 | 48  | 0 | 0.950262622850522 |   |
| MV_Schw | T | 8327 | 19  | 0 |                   | 1 |
| MV_Schw | C | 8328 | 21  | 0 |                   | 1 |
| MV_Schw | T | 8329 | 12  | 0 |                   | 1 |
| MV_Schw | C | 8330 | 54  | 1 |                   | 1 |
| MV_Schw | A | 8331 | 10  | 0 |                   | 1 |
| MV_Schw | C | 8332 | 132 | 2 |                   | 1 |
| MV_Schw | A | 8333 | 10  | 1 | 0.307480793677112 |   |
| MV_Schw | G | 8334 | 31  | 0 |                   | 1 |
| MV_Schw | A | 8335 | 2   | 0 |                   | 1 |
| MV_Schw | G | 8336 | 29  | 1 |                   | 1 |
| MV_Schw | G | 8337 | 45  | 0 |                   | 1 |
| MV_Schw | T | 8338 | 8   | 0 |                   | 1 |
| MV_Schw | G | 8339 | 50  | 1 |                   | 1 |
| MV_Schw | T | 8340 | 2   | 0 |                   | 1 |
| MV_Schw | T | 8341 | 31  | 1 |                   | 1 |
| MV_Schw | A | 8342 | 56  | 2 | 0.968890372475178 |   |
| MV_Schw | T | 8343 | 45  | 1 |                   | 1 |
| MV_Schw | C | 8344 | 101 | 3 |                   | 1 |
| MV_Schw | G | 8345 | 116 | 3 | 0.957721317456694 |   |
| MV_Schw | C | 8346 | 141 | 3 |                   | 1 |
| MV_Schw | T | 8347 | 194 | 5 |                   | 1 |
| MV_Schw | G | 8348 | 167 | 4 |                   | 1 |
| MV_Schw | A | 8349 | 4   | 0 |                   | 1 |
| MV_Schw | C | 8350 | 128 | 3 |                   | 1 |

|         |   |      |     |    |                    |   |
|---------|---|------|-----|----|--------------------|---|
| MV_Schw | A | 8351 | 19  | 1  |                    | 1 |
| MV_Schw | A | 8352 | 8   | 0  |                    | 1 |
| MV_Schw | T | 8353 | 4   | 0  |                    | 1 |
| MV_Schw | C | 8354 | 17  | 0  |                    | 1 |
| MV_Schw | A | 8355 | 27  | 0  |                    | 1 |
| MV_Schw | A | 8356 | 45  | 3  | 0.340185031164498  |   |
| MV_Schw | G | 8357 | 273 | 12 | 0.0488236628860313 |   |
| MV_Schw | C | 8358 | 33  | 0  |                    | 1 |
| MV_Schw | A | 8359 | 39  | 1  |                    | 1 |
| MV_Schw | A | 8360 | 8   | 0  |                    | 1 |
| MV_Schw | A | 8361 | 10  | 1  | 0.822598489333375  |   |
| MV_Schw | A | 8362 | 83  | 1  |                    | 1 |
| MV_Schw | T | 8363 | 29  | 0  |                    | 1 |
| MV_Schw | G | 8364 | 41  | 0  |                    | 1 |
| MV_Schw | G | 8365 | 19  | 0  |                    | 1 |
| MV_Schw | G | 8366 | 52  | 1  |                    | 1 |
| MV_Schw | C | 8367 | 83  | 1  |                    | 1 |
| MV_Schw | T | 8368 | 25  | 0  |                    | 1 |
| MV_Schw | G | 8369 | 29  | 1  | 0.789229943133706  |   |
| MV_Schw | T | 8370 | 16  | 0  |                    | 1 |
| MV_Schw | C | 8371 | 101 | 3  |                    | 1 |
| MV_Schw | C | 8372 | 380 | 3  | 0.286462760557962  |   |
| MV_Schw | C | 8373 | 331 | 9  | 0.789229943133706  |   |
| MV_Schw | G | 8374 | 200 | 5  | 0.953489044526869  |   |
| MV_Schw | A | 8375 | 50  | 1  |                    | 1 |
| MV_Schw | C | 8376 | 213 | 4  |                    | 1 |
| MV_Schw | A | 8377 | 33  | 0  |                    | 1 |
| MV_Schw | A | 8378 | 14  | 0  |                    | 1 |
| MV_Schw | C | 8379 | 215 | 3  | 0.957721317456694  |   |
| MV_Schw | A | 8380 | 8   | 0  |                    | 1 |
| MV_Schw | C | 8381 | 62  | 1  |                    | 1 |
| MV_Schw | G | 8382 | 74  | 0  | 0.795198078226602  |   |
| MV_Schw | A | 8383 | 39  | 1  |                    | 1 |
| MV_Schw | A | 8384 | 39  | 1  |                    | 1 |
| MV_Schw | C | 8385 | 91  | 2  |                    | 1 |
| MV_Schw | A | 8386 | 14  | 1  | 0.944879389258477  |   |

|         |   |      |     |   |                    |   |
|---------|---|------|-----|---|--------------------|---|
| MV_Schw | G | 8387 | 10  | 0 |                    | 1 |
| MV_Schw | A | 8388 | 6   | 0 |                    | 1 |
| MV_Schw | T | 8389 | 91  | 0 | 0.497615650989996  |   |
| MV_Schw | G | 8390 | 39  | 0 |                    | 1 |
| MV_Schw | A | 8391 | 2   | 0 |                    | 1 |
| MV_Schw | C | 8392 | 85  | 3 | 0.918952129071198  |   |
| MV_Schw | A | 8393 | 10  | 0 |                    | 1 |
| MV_Schw | A | 8394 | 10  | 0 |                    | 1 |
| MV_Schw | G | 8395 | 41  | 1 |                    | 1 |
| MV_Schw | T | 8396 | 25  | 0 |                    | 1 |
| MV_Schw | T | 8397 | 120 | 1 | 0.789229943133706  |   |
| MV_Schw | G | 8398 | 64  | 1 |                    | 1 |
| MV_Schw | C | 8399 | 186 | 4 |                    | 1 |
| MV_Schw | G | 8400 | 109 | 3 |                    | 1 |
| MV_Schw | A | 8401 | 60  | 2 | 0.983041048229953  |   |
| MV_Schw | A | 8402 | 23  | 1 | 0.658415249679101  |   |
| MV_Schw | T | 8403 | 116 | 2 |                    | 1 |
| MV_Schw | G | 8404 | 21  | 1 |                    | 1 |
| MV_Schw | G | 8405 | 130 | 3 |                    | 1 |
| MV_Schw | A | 8406 | 48  | 1 |                    | 1 |
| MV_Schw | G | 8407 | 74  | 3 | 0.44280652126772   |   |
| MV_Schw | A | 8408 | 10  | 1 | 0.307480793677112  |   |
| MV_Schw | C | 8409 | 372 | 1 | 0.0188268016494874 |   |
| MV_Schw | A | 8410 | 23  | 0 |                    | 1 |
| MV_Schw | T | 8411 | 33  | 2 | 0.463720798159947  |   |
| MV_Schw | G | 8412 | 81  | 1 |                    | 1 |
| MV_Schw | C | 8413 | 112 | 5 | 0.449295143732283  |   |
| MV_Schw | T | 8414 | 95  | 2 |                    | 1 |
| MV_Schw | T | 8415 | 10  | 1 | 0.822598489333375  |   |
| MV_Schw | C | 8416 | 52  | 2 | 0.78354985902497   |   |
| MV_Schw | C | 8417 | 134 | 3 |                    | 1 |
| MV_Schw | A | 8418 | 16  | 0 |                    | 1 |
| MV_Schw | A | 8419 | 17  | 0 |                    | 1 |
| MV_Schw | C | 8420 | 277 | 7 |                    | 1 |
| MV_Schw | A | 8421 | 4   | 0 |                    | 1 |
| MV_Schw | G | 8422 | 91  | 3 |                    | 1 |

|         |   |      |     |   |                    |   |
|---------|---|------|-----|---|--------------------|---|
| MV_Schw | G | 8423 | 8   | 1 | 0.789229943133706  |   |
| MV_Schw | C | 8424 | 31  | 0 |                    | 1 |
| MV_Schw | G | 8425 | 45  | 1 |                    | 1 |
| MV_Schw | T | 8426 | 21  | 0 |                    | 1 |
| MV_Schw | G | 8427 | 122 | 3 |                    | 1 |
| MV_Schw | T | 8428 | 4   | 0 |                    | 1 |
| MV_Schw | A | 8429 | 8   | 0 |                    | 1 |
| MV_Schw | A | 8430 | 21  | 0 |                    | 1 |
| MV_Schw | G | 8431 | 64  | 1 |                    | 1 |
| MV_Schw | G | 8432 | 12  | 0 |                    | 1 |
| MV_Schw | G | 8433 | 465 | 6 | 0.722614347008795  |   |
| MV_Schw | T | 8434 | 14  | 0 |                    | 1 |
| MV_Schw | A | 8435 | 16  | 0 |                    | 1 |
| MV_Schw | A | 8436 | 2   | 0 |                    | 1 |
| MV_Schw | A | 8437 | 16  | 0 |                    | 1 |
| MV_Schw | A | 8438 | 27  | 1 |                    | 1 |
| MV_Schw | T | 8439 | 16  | 0 |                    | 1 |
| MV_Schw | C | 8440 | 19  | 0 |                    | 1 |
| MV_Schw | C | 8441 | 138 | 3 |                    | 1 |
| MV_Schw | A | 8442 | 143 | 2 |                    | 1 |
| MV_Schw | A | 8443 | 35  | 0 |                    | 1 |
| MV_Schw | G | 8444 | 110 | 1 |                    | 1 |
| MV_Schw | C | 8445 | 21  | 1 |                    | 1 |
| MV_Schw | A | 8446 | 10  | 0 |                    | 1 |
| MV_Schw | C | 8447 | 19  | 1 |                    | 1 |
| MV_Schw | T | 8448 | 10  | 0 |                    | 1 |
| MV_Schw | C | 8449 | 23  | 0 |                    | 1 |
| MV_Schw | T | 8450 | 17  | 0 |                    | 1 |
| MV_Schw | G | 8451 | 93  | 1 |                    | 1 |
| MV_Schw | C | 8452 | 198 | 0 | 0.0437447203304695 |   |
| MV_Schw | G | 8453 | 97  | 0 | 0.503192867159235  |   |
| MV_Schw | A | 8454 | 33  | 1 |                    | 1 |
| MV_Schw | G | 8455 | 93  | 3 | 0.747390316041078  |   |
| MV_Schw | A | 8456 | 4   | 0 |                    | 1 |
| MV_Schw | A | 8457 | 10  | 1 | 0.822598489333375  |   |
| MV_Schw | T | 8458 | 12  | 0 |                    | 1 |

|         |    |      |     |    |                    |    |
|---------|----|------|-----|----|--------------------|----|
| MV_Schw | C  | 8459 | 68  | 1  |                    | 1  |
| MV_Schw | C  | 8460 | 31  | 1  | 0.791667533131283  |    |
| MV_Schw | C  | 8461 | 186 | 4  |                    | 1  |
| MV_Schw | G  | 8462 | 250 | 11 | 0.0887977744330375 |    |
| MV_Schw | A  | 8463 | 110 | 3  |                    | 1  |
| MV_Schw | G  | 8464 | 124 | 5  | 0.346347435414351  |    |
| MV_Schw | T  | 8465 | 14  | 1  | 0.944879389258477  |    |
| MV_Schw | G  | 8466 | 58  | 1  |                    | 1  |
| MV_Schw | G  | 8467 | 14  | 0  |                    | 1  |
| MV_Schw | G  | 8468 | 229 | 7  | 0.88950624150852   |    |
| MV_Schw | C  | 8469 | 171 | 5  |                    | 1  |
| MV_Schw | A  | 8470 | 21  | 1  |                    | 1  |
| MV_Schw | C  | 8471 | 12  | 0  |                    | 1  |
| MV_Schw | C  | 8472 | 19  | 1  |                    | 1  |
| MV_Schw | A  | 8473 | 14  | 1  | 0.944879389258477  |    |
| MV_Schw | T  | 8474 | 35  | 1  |                    | 1  |
| MV_Schw | T  | 8475 | 8   | 0  |                    | 1  |
| MV_Schw | G  | 8476 | 50  | 2  | 0.746970975838775  |    |
| MV_Schw | A  | 8477 | 2   | 0  |                    | 1  |
| MV_Schw | A  | 8478 | 14  | 0  |                    | 1  |
| MV_Schw | G  | 8479 | 167 | 3  |                    | 1  |
| MV_Schw | G  | 8480 | 8   | 0  |                    | 1  |
| MV_Schw | NA | 8481 | 0   | 0  |                    | NA |
| MV_Schw | T  | 8482 | 14  | 1  | 0.426789350155389  |    |
| MV_Schw | A  | 8483 | 17  | 2  | 0.190596323698557  |    |
| MV_Schw | A  | 8484 | 39  | 1  |                    | 1  |
| MV_Schw | C  | 8485 | 264 | 12 | 0.0417856306742298 |    |
| MV_Schw | A  | 8486 | 17  | 1  | 0.528591092326266  |    |
| MV_Schw | G  | 8487 | 60  | 4  | 0.130118305522798  |    |
| MV_Schw | G  | 8488 | 25  | 0  |                    | 1  |
| MV_Schw | A  | 8489 | 19  | 0  |                    | 1  |
| MV_Schw | T  | 8490 | 29  | 1  | 0.789229943133706  |    |
| MV_Schw | T  | 8491 | 4   | 0  |                    | 1  |
| MV_Schw | C  | 8492 | 52  | 1  |                    | 1  |
| MV_Schw | C  | 8493 | 78  | 1  |                    | 1  |
| MV_Schw | T  | 8494 | 25  | 0  |                    | 1  |

|         |    |      |     |   |                    |    |
|---------|----|------|-----|---|--------------------|----|
| MV_Schw | T  | 8495 | 182 | 3 |                    | 1  |
| MV_Schw | C  | 8496 | 31  | 1 | 0.791667533131283  |    |
| MV_Schw | A  | 8497 | 17  | 1 | 0.983041048229953  |    |
| MV_Schw | T  | 8498 | 27  | 0 |                    | 1  |
| MV_Schw | A  | 8499 | 60  | 0 | 0.957721317456694  |    |
| MV_Schw | C  | 8500 | 99  | 0 | 0.509396577320122  |    |
| MV_Schw | G  | 8501 | 60  | 0 | 0.957721317456694  |    |
| MV_Schw | G  | 8502 | 29  | 0 |                    | 1  |
| MV_Schw | G  | 8503 | 126 | 7 | 0.0364439659893172 |    |
| MV_Schw | G  | 8504 | 29  | 1 | 0.789229943133706  |    |
| MV_Schw | NA | 8505 | 0   | 0 |                    | NA |
| MV_Schw | C  | 8506 | 198 | 2 | 0.822598489333375  |    |
| MV_Schw | T  | 8507 | 12  | 1 | 0.88950624150852   |    |
| MV_Schw | T  | 8508 | 39  | 1 | 0.9314909603024    |    |
| MV_Schw | G  | 8509 | 91  | 1 |                    | 1  |
| MV_Schw | T  | 8510 | 39  | 0 |                    | 1  |
| MV_Schw | C  | 8511 | 97  | 1 |                    | 1  |
| MV_Schw | T  | 8512 | 70  | 1 |                    | 1  |
| MV_Schw | G  | 8513 | 205 | 1 | 0.443070383640094  |    |
| MV_Schw | T  | 8514 | 10  | 0 |                    | 1  |
| MV_Schw | T  | 8515 | 29  | 1 |                    | 1  |
| MV_Schw | G  | 8516 | 91  | 0 | 0.497615650989996  |    |
| MV_Schw | A  | 8517 | 27  | 0 |                    | 1  |
| MV_Schw | T  | 8518 | 78  | 0 | 0.638894311640422  |    |
| MV_Schw | C  | 8519 | 172 | 1 | 0.789229943133706  |    |
| MV_Schw | T  | 8520 | 16  | 1 | 0.950262622850522  |    |
| MV_Schw | G  | 8521 | 17  | 0 |                    | 1  |
| MV_Schw | A  | 8522 | 10  | 0 |                    | 1  |
| MV_Schw | G  | 8523 | 378 | 6 |                    | 1  |
| MV_Schw | T  | 8524 | 23  | 0 |                    | 1  |
| MV_Schw | C  | 8525 | 87  | 2 |                    | 1  |
| MV_Schw | T  | 8526 | 138 | 1 | 0.673422966374487  |    |
| MV_Schw | G  | 8527 | 74  | 1 |                    | 1  |
| MV_Schw | A  | 8528 | 12  | 0 |                    | 1  |
| MV_Schw | C  | 8529 | 221 | 7 | 0.783925131106103  |    |
| MV_Schw | A  | 8530 | 25  | 1 | 0.704667204683568  |    |

|         |    |      |     |    |                      |    |
|---------|----|------|-----|----|----------------------|----|
| MV_Schw | G  | 8531 | 176 | 4  |                      | 1  |
| MV_Schw | T  | 8532 | 16  | 1  | 0.950262622850522    |    |
| MV_Schw | T  | 8533 | 19  | 0  |                      | 1  |
| MV_Schw | G  | 8534 | 76  | 1  |                      | 1  |
| MV_Schw | A  | 8535 | 6   | 0  |                      | 1  |
| MV_Schw | G  | 8536 | 109 | 3  |                      | 1  |
| MV_Schw | C  | 8537 | 62  | 1  |                      | 1  |
| MV_Schw | T  | 8538 | 39  | 1  | 0.9314909603024      |    |
| MV_Schw | NA | 8539 | 0   | 0  |                      | NA |
| MV_Schw | A  | 8540 | 10  | 0  |                      | 1  |
| MV_Schw | A  | 8541 | 4   | 0  |                      | 1  |
| MV_Schw | A  | 8542 | 10  | 0  |                      | 1  |
| MV_Schw | A  | 8543 | 25  | 0  |                      | 1  |
| MV_Schw | T  | 8544 | 29  | 1  |                      | 1  |
| MV_Schw | C  | 8545 | 47  | 1  |                      | 1  |
| MV_Schw | A  | 8546 | 14  | 1  | 0.944879389258477    |    |
| MV_Schw | A  | 8547 | 19  | 0  |                      | 1  |
| MV_Schw | A  | 8548 | 19  | 0  |                      | 1  |
| MV_Schw | A  | 8549 | 12  | 1  | 0.88950624150852     |    |
| MV_Schw | T  | 8550 | 6   | 0  |                      | 1  |
| MV_Schw | T  | 8551 | 8   | 0  |                      | 1  |
| MV_Schw | G  | 8552 | 14  | 1  | 0.944879389258477    |    |
| MV_Schw | C  | 8553 | 258 | 3  |                      | 1  |
| MV_Schw | T  | 8554 | 19  | 0  |                      | 1  |
| MV_Schw | T  | 8555 | 54  | 4  | 0.094193442838711    |    |
| MV_Schw | C  | 8556 | 91  | 10 | 2.46659292961509e-05 |    |
| MV_Schw | G  | 8557 | 21  | 1  |                      | 1  |
| MV_Schw | G  | 8558 | 29  | 1  |                      | 1  |
| MV_Schw | G  | 8559 | 112 | 3  | 0.950262622850522    |    |
| MV_Schw | A  | 8560 | 48  | 0  | 0.950262622850522    |    |
| MV_Schw | T  | 8561 | 16  | 0  |                      | 1  |
| MV_Schw | T  | 8562 | 47  | 0  |                      | 1  |
| MV_Schw | C  | 8563 | 66  | 1  |                      | 1  |
| MV_Schw | G  | 8564 | 277 | 3  | 0.598480293360952    |    |
| MV_Schw | G  | 8565 | 78  | 1  |                      | 1  |
| MV_Schw | G  | 8566 | 341 | 12 | 0.258627633593378    |    |

|         |   |      |     |   |                   |   |
|---------|---|------|-----|---|-------------------|---|
| MV_Schw | C | 8567 | 25  | 0 |                   | 1 |
| MV_Schw | C | 8568 | 68  | 1 |                   | 1 |
| MV_Schw | A | 8569 | 29  | 1 |                   | 1 |
| MV_Schw | T | 8570 | 16  | 0 |                   | 1 |
| MV_Schw | T | 8571 | 149 | 1 | 0.550155392537109 |   |
| MV_Schw | G | 8572 | 17  | 0 |                   | 1 |
| MV_Schw | A | 8573 | 70  | 1 |                   | 1 |
| MV_Schw | T | 8574 | 29  | 1 |                   | 1 |
| MV_Schw | C | 8575 | 109 | 1 | 0.947544583923452 |   |
| MV_Schw | A | 8576 | 16  | 0 |                   | 1 |
| MV_Schw | C | 8577 | 89  | 2 |                   | 1 |
| MV_Schw | A | 8578 | 31  | 1 | 0.791667533131283 |   |
| MV_Schw | C | 8579 | 240 | 3 | 0.789229943133706 |   |
| MV_Schw | A | 8580 | 12  | 0 |                   | 1 |
| MV_Schw | C | 8581 | 10  | 0 |                   | 1 |
| MV_Schw | G | 8582 | 19  | 0 |                   | 1 |
| MV_Schw | G | 8583 | 45  | 1 |                   | 1 |
| MV_Schw | T | 8584 | 19  | 1 |                   | 1 |
| MV_Schw | T | 8585 | 8   | 0 |                   | 1 |
| MV_Schw | C | 8586 | 153 | 1 | 0.436311974989592 |   |
| MV_Schw | A | 8587 | 31  | 0 |                   | 1 |
| MV_Schw | G | 8588 | 62  | 0 | 0.789229943133706 |   |
| MV_Schw | G | 8589 | 93  | 0 | 0.498091317793217 |   |
| MV_Schw | G | 8590 | 21  | 1 |                   | 1 |
| MV_Schw | A | 8591 | 6   | 0 |                   | 1 |
| MV_Schw | T | 8592 | 50  | 0 | 0.950262622850522 |   |
| MV_Schw | G | 8593 | 25  | 0 |                   | 1 |
| MV_Schw | G | 8594 | 47  | 1 |                   | 1 |
| MV_Schw | A | 8595 | 4   | 0 |                   | 1 |
| MV_Schw | C | 8596 | 68  | 1 |                   | 1 |
| MV_Schw | C | 8597 | 27  | 1 | 0.752394317790241 |   |
| MV_Schw | T | 8598 | 0   | 0 |                   | 1 |
| MV_Schw | A | 8599 | 14  | 1 | 0.944879389258477 |   |
| MV_Schw | T | 8600 | 95  | 2 |                   | 1 |
| MV_Schw | A | 8601 | 54  | 1 |                   | 1 |
| MV_Schw | C | 8602 | 41  | 2 | 0.599534349993353 |   |



|         |   |      |     |   |                   |
|---------|---|------|-----|---|-------------------|
| MV_Schw | A | 8603 | 14  | 1 | 0.426789350155389 |
| MV_Schw | A | 8604 | 6   | 0 | 1                 |
| MV_Schw | A | 8605 | 35  | 2 | 0.497615650989996 |
| MV_Schw | T | 8606 | 39  | 2 | 0.560243889454362 |
| MV_Schw | C | 8607 | 93  | 1 | 1                 |
| MV_Schw | C | 8608 | 35  | 1 | 1                 |
| MV_Schw | A | 8609 | 41  | 0 | 1                 |
| MV_Schw | A | 8610 | 47  | 2 | 0.678058690427187 |
| MV_Schw | C | 8611 | 140 | 3 | 1                 |
| MV_Schw | C | 8612 | 17  | 0 | 1                 |
| MV_Schw | A | 8613 | 10  | 0 | 1                 |
| MV_Schw | C | 8614 | 54  | 3 | 0.480219983992261 |
| MV_Schw | A | 8615 | 41  | 2 | 0.599534349993353 |
| MV_Schw | A | 8616 | 16  | 0 | 1                 |
| MV_Schw | C | 8617 | 25  | 1 | 1                 |
| MV_Schw | A | 8618 | 6   | 0 | 1                 |
| MV_Schw | A | 8619 | 4   | 0 | 1                 |
| MV_Schw | T | 8620 | 27  | 0 | 1                 |
| MV_Schw | G | 8621 | 23  | 1 | 1                 |
| MV_Schw | T | 8622 | 10  | 0 | 1                 |
| MV_Schw | G | 8623 | 41  | 0 | 1                 |
| MV_Schw | T | 8624 | 23  | 1 | 1                 |
| MV_Schw | A | 8625 | 14  | 0 | 1                 |
| MV_Schw | T | 8626 | 8   | 0 | 1                 |
| MV_Schw | T | 8627 | 35  | 0 | 1                 |
| MV_Schw | G | 8628 | 35  | 0 | 1                 |
| MV_Schw | G | 8629 | 184 | 1 | 0.277229700444564 |
| MV_Schw | C | 8630 | 107 | 1 | 0.945767847051808 |
| MV_Schw | T | 8631 | 202 | 1 | 0.216853413677777 |
| MV_Schw | G | 8632 | 54  | 1 | 1                 |
| MV_Schw | A | 8633 | 16  | 0 | 1                 |
| MV_Schw | C | 8634 | 118 | 1 | 0.789229943133706 |
| MV_Schw | T | 8635 | 27  | 0 | 1                 |
| MV_Schw | A | 8636 | 35  | 1 | 1                 |
| MV_Schw | T | 8637 | 17  | 0 | 1                 |
| MV_Schw | C | 8638 | 31  | 1 | 1                 |

|         |    |      |     |   |                    |    |
|---------|----|------|-----|---|--------------------|----|
| MV_Schw | C  | 8639 | 258 | 2 | 0.437908798039714  |    |
| MV_Schw | C  | 8640 | 411 | 3 | 0.1894828911111102 |    |
| MV_Schw | G  | 8641 | 62  | 1 |                    | 1  |
| MV_Schw | C  | 8642 | 110 | 4 | 0.639207655977387  |    |
| MV_Schw | C  | 8643 | 47  | 1 |                    | 1  |
| MV_Schw | A  | 8644 | 29  | 0 |                    | 1  |
| MV_Schw | A  | 8645 | 8   | 0 |                    | 1  |
| MV_Schw | T  | 8646 | 21  | 0 |                    | 1  |
| MV_Schw | G  | 8647 | 105 | 2 |                    | 1  |
| MV_Schw | A  | 8648 | 10  | 0 |                    | 1  |
| MV_Schw | A  | 8649 | 14  | 0 |                    | 1  |
| MV_Schw | G  | 8650 | 25  | 0 |                    | 1  |
| MV_Schw | A  | 8651 | 4   | 0 |                    | 1  |
| MV_Schw | A  | 8652 | 4   | 0 |                    | 1  |
| MV_Schw | C  | 8653 | 64  | 3 | 0.609091736782917  |    |
| MV_Schw | C  | 8654 | 95  | 1 |                    | 1  |
| MV_Schw | T  | 8655 | 23  | 0 |                    | 1  |
| MV_Schw | A  | 8656 | 12  | 0 |                    | 1  |
| MV_Schw | G  | 8657 | 56  | 2 | 0.968890372475178  |    |
| MV_Schw | C  | 8658 | 16  | 1 | 0.950262622850522  |    |
| MV_Schw | C  | 8659 | 196 | 1 | 0.214586843368945  |    |
| MV_Schw | T  | 8660 | 2   | 1 | 0.491835918445353  |    |
| MV_Schw | NA | 8661 | 0   | 0 |                    | NA |
| MV_Schw | A  | 8662 | 6   | 1 | 0.704667204683568  |    |
| MV_Schw | G  | 8663 | 21  | 0 |                    | 1  |
| MV_Schw | G  | 8664 | 101 | 0 | 0.51781700540984   |    |
| MV_Schw | T  | 8665 | 12  | 0 |                    | 1  |
| MV_Schw | G  | 8666 | 33  | 1 |                    | 1  |
| MV_Schw | T  | 8667 | 0   | 0 |                    | 1  |
| MV_Schw | A  | 8668 | 31  | 0 |                    | 1  |
| MV_Schw | A  | 8669 | 14  | 0 |                    | 1  |
| MV_Schw | T  | 8670 | 56  | 2 | 0.968890372475178  |    |
| MV_Schw | C  | 8671 | 50  | 1 |                    | 1  |
| MV_Schw | A  | 8672 | 52  | 1 |                    | 1  |
| MV_Schw | A  | 8673 | 14  | 1 | 0.944879389258477  |    |
| MV_Schw | C  | 8674 | 54  | 1 |                    | 1  |

|         |   |      |     |    |                     |
|---------|---|------|-----|----|---------------------|
| MV_Schw | A | 8675 | 0   | 0  | 1                   |
| MV_Schw | C | 8676 | 4   | 0  | 1                   |
| MV_Schw | A | 8677 | 21  | 0  | 1                   |
| MV_Schw | T | 8678 | 6   | 0  | 1                   |
| MV_Schw | T | 8679 | 10  | 1  | 0.822598489333375   |
| MV_Schw | G | 8680 | 23  | 1  | 0.658415249679101   |
| MV_Schw | G | 8681 | 10  | 0  | 1                   |
| MV_Schw | A | 8682 | 8   | 0  | 1                   |
| MV_Schw | G | 8683 | 85  | 1  | 1                   |
| MV_Schw | T | 8684 | 118 | 1  | 0.789229943133706   |
| MV_Schw | G | 8685 | 10  | 1  | 0.822598489333375   |
| MV_Schw | G | 8686 | 23  | 1  | 1                   |
| MV_Schw | A | 8687 | 6   | 0  | 1                   |
| MV_Schw | T | 8688 | 85  | 1  | 1                   |
| MV_Schw | A | 8689 | 16  | 0  | 1                   |
| MV_Schw | C | 8690 | 961 | 10 | 0.0501396448119915  |
| MV_Schw | C | 8691 | 452 | 7  | 0.950262622850522   |
| MV_Schw | G | 8692 | 31  | 1  | 1                   |
| MV_Schw | A | 8693 | 50  | 2  | 0.746970975838775   |
| MV_Schw | G | 8694 | 89  | 2  | 1                   |
| MV_Schw | A | 8695 | 99  | 4  | 0.560243889454362   |
| MV_Schw | T | 8696 | 48  | 0  | 0.950262622850522   |
| MV_Schw | T | 8697 | 25  | 1  | 1                   |
| MV_Schw | C | 8698 | 47  | 1  | 1                   |
| MV_Schw | A | 8699 | 14  | 1  | 0.944879389258477   |
| MV_Schw | A | 8700 | 8   | 1  | 0.258627633593378   |
| MV_Schw | G | 8701 | 605 | 3  | 0.00706159361586363 |
| MV_Schw | G | 8702 | 128 | 1  | 0.658415249679101   |
| MV_Schw | T | 8703 | 14  | 1  | 0.944879389258477   |
| MV_Schw | T | 8704 | 4   | 0  | 1                   |
| MV_Schw | A | 8705 | 19  | 1  | 1                   |
| MV_Schw | G | 8706 | 267 | 4  | 1                   |
| MV_Schw | T | 8707 | 12  | 0  | 1                   |
| MV_Schw | C | 8708 | 76  | 0  | 0.638894311640422   |
| MV_Schw | C | 8709 | 184 | 3  | 1                   |
| MV_Schw | C | 8710 | 99  | 1  | 0.944879389258477   |

|         |   |      |     |   |                   |
|---------|---|------|-----|---|-------------------|
| MV_Schw | T | 8711 | 50  | 2 | 0.746970975838775 |
| MV_Schw | A | 8712 | 50  | 0 | 0.950262622850522 |
| MV_Schw | C | 8713 | 112 | 1 | 1                 |
| MV_Schw | C | 8714 | 35  | 0 | 1                 |
| MV_Schw | T | 8715 | 8   | 1 | 0.789229943133706 |
| MV_Schw | C | 8716 | 202 | 1 | 0.551026371204373 |
| MV_Schw | T | 8717 | 10  | 0 | 1                 |
| MV_Schw | T | 8718 | 19  | 1 | 1                 |
| MV_Schw | C | 8719 | 47  | 1 | 1                 |
| MV_Schw | A | 8720 | 52  | 0 | 0.950262622850522 |
| MV_Schw | C | 8721 | 58  | 1 | 1                 |
| MV_Schw | T | 8722 | 6   | 0 | 1                 |
| MV_Schw | G | 8723 | 33  | 0 | 1                 |
| MV_Schw | T | 8724 | 21  | 1 | 1                 |
| MV_Schw | C | 8725 | 52  | 0 | 0.950262622850522 |
| MV_Schw | C | 8726 | 66  | 1 | 1                 |
| MV_Schw | C | 8727 | 79  | 3 | 0.882548734849042 |
| MV_Schw | A | 8728 | 21  | 0 | 1                 |
| MV_Schw | A | 8729 | 17  | 1 | 0.528591092326266 |
| MV_Schw | T | 8730 | 10  | 1 | 0.822598489333375 |
| MV_Schw | T | 8731 | 21  | 1 | 1                 |
| MV_Schw | A | 8732 | 29  | 0 | 1                 |
| MV_Schw | A | 8733 | 10  | 0 | 1                 |
| MV_Schw | G | 8734 | 50  | 1 | 1                 |
| MV_Schw | G | 8735 | 33  | 2 | 0.463720798159947 |
| MV_Schw | A | 8736 | 23  | 0 | 1                 |
| MV_Schw | A | 8737 | 12  | 1 | 0.366832525336205 |
| MV_Schw | G | 8738 | 45  | 0 | 1                 |
| MV_Schw | C | 8739 | 85  | 1 | 1                 |
| MV_Schw | A | 8740 | 8   | 0 | 1                 |
| MV_Schw | G | 8741 | 128 | 2 | 1                 |
| MV_Schw | G | 8742 | 283 | 6 | 1                 |
| MV_Schw | C | 8743 | 130 | 2 | 1                 |
| MV_Schw | G | 8744 | 76  | 1 | 1                 |
| MV_Schw | A | 8745 | 31  | 1 | 1                 |
| MV_Schw | A | 8746 | 35  | 1 | 1                 |

|         |   |      |     |    |                     |
|---------|---|------|-----|----|---------------------|
| MV_Schw | G | 8747 | 64  | 0  | 0.789229943133706   |
| MV_Schw | A | 8748 | 19  | 0  | 1                   |
| MV_Schw | C | 8749 | 298 | 6  | 1                   |
| MV_Schw | T | 8750 | 37  | 1  | 1                   |
| MV_Schw | G | 8751 | 128 | 2  | 1                   |
| MV_Schw | C | 8752 | 380 | 10 | 0.944879389258477   |
| MV_Schw | C | 8753 | 203 | 4  | 1                   |
| MV_Schw | A | 8754 | 267 | 2  | 0.355295708921217   |
| MV_Schw | T | 8755 | 39  | 1  | 1                   |
| MV_Schw | G | 8756 | 45  | 0  | 1                   |
| MV_Schw | C | 8757 | 446 | 3  | 0.121677050932237   |
| MV_Schw | C | 8758 | 134 | 0  | 0.222853068696264   |
| MV_Schw | C | 8759 | 76  | 3  | 0.849410970830975   |
| MV_Schw | C | 8760 | 169 | 5  | 0.945767847051808   |
| MV_Schw | A | 8761 | 70  | 1  | 1                   |
| MV_Schw | A | 8762 | 17  | 1  | 0.983041048229953   |
| MV_Schw | C | 8763 | 85  | 2  | 1                   |
| MV_Schw | A | 8764 | 12  | 0  | 1                   |
| MV_Schw | T | 8765 | 29  | 0  | 1                   |
| MV_Schw | A | 8766 | 2   | 0  | 1                   |
| MV_Schw | C | 8767 | 39  | 1  | 0.9314909603024     |
| MV_Schw | C | 8768 | 16  | 0  | 1                   |
| MV_Schw | T | 8769 | 23  | 0  | 1                   |
| MV_Schw | A | 8770 | 10  | 1  | 0.822598489333375   |
| MV_Schw | C | 8771 | 17  | 0  | 1                   |
| MV_Schw | C | 8772 | 66  | 1  | 1                   |
| MV_Schw | T | 8773 | 43  | 1  | 1                   |
| MV_Schw | G | 8774 | 105 | 9  | 0.00125438572154573 |
| MV_Schw | C | 8775 | 176 | 1  | 0.648224297390367   |
| MV_Schw | G | 8776 | 74  | 2  | 1                   |
| MV_Schw | G | 8777 | 116 | 3  | 0.957721317456694   |
| MV_Schw | A | 8778 | 35  | 0  | 1                   |
| MV_Schw | G | 8779 | 39  | 2  | 0.560243889454362   |
| MV_Schw | G | 8780 | 39  | 1  | 0.9314909603024     |
| MV_Schw | T | 8781 | 25  | 1  | 1                   |
| MV_Schw | G | 8782 | 89  | 1  | 1                   |

|         |    |      |     |   |                   |    |
|---------|----|------|-----|---|-------------------|----|
| MV_Schw | G  | 8783 | 39  | 1 |                   | 1  |
| MV_Schw | A  | 8784 | 76  | 1 |                   | 1  |
| MV_Schw | T  | 8785 | 68  | 0 | 0.789229943133706 |    |
| MV_Schw | G  | 8786 | 62  | 2 | 0.991517221373143 |    |
| MV_Schw | G  | 8787 | 101 | 4 | 0.576193745443697 |    |
| MV_Schw | T  | 8788 | 12  | 0 |                   | 1  |
| MV_Schw | G  | 8789 | 29  | 0 |                   | 1  |
| MV_Schw | A  | 8790 | 151 | 3 |                   | 1  |
| MV_Schw | T  | 8791 | 43  | 1 | 0.950262622850522 |    |
| MV_Schw | G  | 8792 | 490 | 7 | 0.923139672094923 |    |
| MV_Schw | T  | 8793 | 6   | 0 |                   | 1  |
| MV_Schw | C  | 8794 | 41  | 0 |                   | 1  |
| MV_Schw | A  | 8795 | 17  | 0 |                   | 1  |
| MV_Schw | A  | 8796 | 16  | 0 |                   | 1  |
| MV_Schw | A  | 8797 | 14  | 0 |                   | 1  |
| MV_Schw | C  | 8798 | 333 | 3 | 0.562679696554225 |    |
| MV_Schw | NA | 8799 | 0   | 0 |                   | NA |
| MV_Schw | C  | 8800 | 14  | 0 |                   | 1  |
| MV_Schw | A  | 8801 | 10  | 0 |                   | 1  |
| MV_Schw | G  | 8802 | 221 | 5 |                   | 1  |
| MV_Schw | T  | 8803 | 25  | 0 |                   | 1  |
| MV_Schw | T  | 8804 | 14  | 0 |                   | 1  |
| MV_Schw | C  | 8805 | 21  | 1 | 0.632968068765344 |    |
| MV_Schw | C  | 8806 | 6   | 0 |                   | 1  |
| MV_Schw | A  | 8807 | 29  | 0 |                   | 1  |
| MV_Schw | A  | 8808 | 246 | 6 |                   | 1  |
| MV_Schw | T  | 8809 | 76  | 3 | 0.467924584055268 |    |
| MV_Schw | C  | 8810 | 45  | 0 |                   | 1  |
| MV_Schw | T  | 8811 | 19  | 0 |                   | 1  |
| MV_Schw | G  | 8812 | 153 | 7 | 0.228458243153358 |    |
| MV_Schw | G  | 8813 | 397 | 3 | 0.233813270352997 |    |
| MV_Schw | T  | 8814 | 68  | 1 |                   | 1  |
| MV_Schw | G  | 8815 | 99  | 0 | 0.509396577320122 |    |
| MV_Schw | A  | 8816 | 54  | 0 | 0.950262622850522 |    |
| MV_Schw | T  | 8817 | 25  | 0 |                   | 1  |
| MV_Schw | T  | 8818 | 45  | 0 |                   | 1  |

|         |   |      |     |   |                   |   |
|---------|---|------|-----|---|-------------------|---|
| MV_Schw | C | 8819 | 74  | 1 |                   | 1 |
| MV_Schw | T | 8820 | 33  | 1 |                   | 1 |
| MV_Schw | A | 8821 | 27  | 0 |                   | 1 |
| MV_Schw | C | 8822 | 161 | 1 | 0.78470776546672  |   |
| MV_Schw | C | 8823 | 114 | 1 | 0.789229943133706 |   |
| MV_Schw | T | 8824 | 4   | 0 |                   | 1 |
| MV_Schw | G | 8825 | 54  | 1 |                   | 1 |
| MV_Schw | G | 8826 | 58  | 0 | 0.953489044526869 |   |
| MV_Schw | T | 8827 | 126 | 1 |                   | 1 |
| MV_Schw | C | 8828 | 43  | 1 | 0.950262622850522 |   |
| MV_Schw | A | 8829 | 140 | 0 | 0.230921379149447 |   |
| MV_Schw | A | 8830 | 16  | 0 |                   | 1 |
| MV_Schw | G | 8831 | 107 | 1 | 0.945767847051808 |   |
| MV_Schw | A | 8832 | 68  | 0 | 0.789229943133706 |   |
| MV_Schw | T | 8833 | 23  | 1 |                   | 1 |
| MV_Schw | C | 8834 | 124 | 3 |                   | 1 |
| MV_Schw | T | 8835 | 4   | 0 |                   | 1 |
| MV_Schw | C | 8836 | 70  | 1 |                   | 1 |
| MV_Schw | C | 8837 | 52  | 1 |                   | 1 |
| MV_Schw | A | 8838 | 89  | 1 |                   | 1 |
| MV_Schw | A | 8839 | 4   | 0 |                   | 1 |
| MV_Schw | T | 8840 | 19  | 1 |                   | 1 |
| MV_Schw | A | 8841 | 2   | 0 |                   | 1 |
| MV_Schw | T | 8842 | 6   | 0 |                   | 1 |
| MV_Schw | G | 8843 | 43  | 1 |                   | 1 |
| MV_Schw | T | 8844 | 10  | 0 |                   | 1 |
| MV_Schw | T | 8845 | 33  | 0 |                   | 1 |
| MV_Schw | T | 8846 | 19  | 1 |                   | 1 |
| MV_Schw | T | 8847 | 112 | 1 |                   | 1 |
| MV_Schw | G | 8848 | 14  | 0 |                   | 1 |
| MV_Schw | G | 8849 | 74  | 4 | 0.237817203872315 |   |
| MV_Schw | C | 8850 | 64  | 3 | 0.331831159059729 |   |
| MV_Schw | A | 8851 | 17  | 1 | 0.528591092326266 |   |
| MV_Schw | A | 8852 | 2   | 0 |                   | 1 |
| MV_Schw | C | 8853 | 23  | 0 |                   | 1 |
| MV_Schw | C | 8854 | 48  | 1 |                   | 1 |

|         |    |      |     |   |                   |    |
|---------|----|------|-----|---|-------------------|----|
| MV_Schw | T  | 8855 | 8   | 0 |                   | 1  |
| MV_Schw | A  | 8856 | 35  | 1 |                   | 1  |
| MV_Schw | C  | 8857 | 41  | 1 |                   | 1  |
| MV_Schw | G  | 8858 | 79  | 1 |                   | 1  |
| MV_Schw | A  | 8859 | 8   | 1 | 0.789229943133706 |    |
| MV_Schw | T  | 8860 | 41  | 1 | 0.945767847051808 |    |
| MV_Schw | NA | 8861 | 0   | 0 |                   | NA |
| MV_Schw | C  | 8862 | 16  | 1 | 0.950262622850522 |    |
| MV_Schw | T  | 8863 | 10  | 1 | 0.822598489333375 |    |
| MV_Schw | T  | 8864 | 25  | 0 |                   | 1  |
| MV_Schw | C  | 8865 | 300 | 5 |                   | 1  |
| MV_Schw | C  | 8866 | 19  | 0 |                   | 1  |
| MV_Schw | A  | 8867 | 68  | 1 |                   | 1  |
| MV_Schw | G  | 8868 | 83  | 1 |                   | 1  |
| MV_Schw | G  | 8869 | 76  | 2 |                   | 1  |
| MV_Schw | G  | 8870 | 31  | 1 |                   | 1  |
| MV_Schw | T  | 8871 | 2   | 0 |                   | 1  |
| MV_Schw | T  | 8872 | 35  | 1 |                   | 1  |
| MV_Schw | G  | 8873 | 101 | 1 | 0.944879389258477 |    |
| MV_Schw | A  | 8874 | 12  | 0 |                   | 1  |
| MV_Schw | A  | 8875 | 17  | 0 |                   | 1  |
| MV_Schw | C  | 8876 | 254 | 3 | 0.789229943133706 |    |
| MV_Schw | A  | 8877 | 2   | 1 | 0.491835918445353 |    |
| MV_Schw | T  | 8878 | 10  | 0 |                   | 1  |
| MV_Schw | G  | 8879 | 31  | 0 |                   | 1  |
| MV_Schw | C  | 8880 | 89  | 1 |                   | 1  |
| MV_Schw | T  | 8881 | 60  | 1 |                   | 1  |
| MV_Schw | G  | 8882 | 87  | 2 |                   | 1  |
| MV_Schw | T  | 8883 | 35  | 1 |                   | 1  |
| MV_Schw | G  | 8884 | 76  | 1 |                   | 1  |
| MV_Schw | G  | 8885 | 138 | 2 |                   | 1  |
| MV_Schw | T  | 8886 | 27  | 0 |                   | 1  |
| MV_Schw | T  | 8887 | 21  | 1 | 0.632968068765344 |    |
| MV_Schw | T  | 8888 | 48  | 2 | 0.709032941865358 |    |
| MV_Schw | A  | 8889 | 23  | 0 |                   | 1  |
| MV_Schw | T  | 8890 | 37  | 3 | 0.245202640825390 |    |



|         |    |      |     |   |                   |    |
|---------|----|------|-----|---|-------------------|----|
| MV_Schw | T  | 8891 | 29  | 1 | 0.789229943133706 |    |
| MV_Schw | A  | 8892 | 16  | 0 |                   | 1  |
| MV_Schw | C  | 8893 | 78  | 2 |                   | 1  |
| MV_Schw | G  | 8894 | 48  | 2 | 0.709032941865358 |    |
| MV_Schw | T  | 8895 | 21  | 1 |                   | 1  |
| MV_Schw | T  | 8896 | 39  | 0 |                   | 1  |
| MV_Schw | T  | 8897 | 47  | 1 |                   | 1  |
| MV_Schw | A  | 8898 | 8   | 0 |                   | 1  |
| MV_Schw | C  | 8899 | 56  | 1 |                   | 1  |
| MV_Schw | A  | 8900 | 141 | 4 |                   | 1  |
| MV_Schw | G  | 8901 | 83  | 3 | 0.897349285586955 |    |
| MV_Schw | C  | 8902 | 14  | 0 |                   | 1  |
| MV_Schw | C  | 8903 | 27  | 0 |                   | 1  |
| MV_Schw | C  | 8904 | 81  | 2 |                   | 1  |
| MV_Schw | A  | 8905 | 25  | 0 |                   | 1  |
| MV_Schw | A  | 8906 | 141 | 2 |                   | 1  |
| MV_Schw | G  | 8907 | 81  | 1 |                   | 1  |
| MV_Schw | C  | 8908 | 27  | 0 |                   | 1  |
| MV_Schw | C  | 8909 | 66  | 1 |                   | 1  |
| MV_Schw | G  | 8910 | 10  | 0 |                   | 1  |
| MV_Schw | C  | 8911 | 81  | 3 | 0.88950624150852  |    |
| MV_Schw | T  | 8912 | 31  | 1 | 0.791667533131283 |    |
| MV_Schw | C  | 8913 | 35  | 0 |                   | 1  |
| MV_Schw | A  | 8914 | 50  | 0 | 0.950262622850522 |    |
| MV_Schw | T  | 8915 | 4   | 0 |                   | 1  |
| MV_Schw | NA | 8916 | 0   | 0 |                   | NA |
| MV_Schw | T  | 8917 | 14  | 0 |                   | 1  |
| MV_Schw | T  | 8918 | 10  | 0 |                   | 1  |
| MV_Schw | C  | 8919 | 66  | 0 | 0.789229943133706 |    |
| MV_Schw | T  | 8920 | 35  | 0 |                   | 1  |
| MV_Schw | T  | 8921 | 31  | 0 |                   | 1  |
| MV_Schw | A  | 8922 | 2   | 0 |                   | 1  |
| MV_Schw | C  | 8923 | 29  | 0 |                   | 1  |
| MV_Schw | T  | 8924 | 2   | 0 |                   | 1  |
| MV_Schw | T  | 8925 | 4   | 0 |                   | 1  |
| MV_Schw | T  | 8926 | 8   | 1 | 0.789229943133706 |    |

|         |    |      |     |   |                   |    |
|---------|----|------|-----|---|-------------------|----|
| MV_Schw | T  | 8927 | 8   | 0 |                   | 1  |
| MV_Schw | A  | 8928 | 10  | 0 |                   | 1  |
| MV_Schw | T  | 8929 | 10  | 0 |                   | 1  |
| MV_Schw | C  | 8930 | 23  | 0 |                   | 1  |
| MV_Schw | C  | 8931 | 19  | 1 |                   | 1  |
| MV_Schw | T  | 8932 | 8   | 0 |                   | 1  |
| MV_Schw | T  | 8933 | 4   | 1 | 0.619556855087002 |    |
| MV_Schw | T  | 8934 | 12  | 1 | 0.88950624150852  |    |
| MV_Schw | T  | 8935 | 8   | 0 |                   | 1  |
| MV_Schw | A  | 8936 | 10  | 1 | 0.822598489333375 |    |
| MV_Schw | NA | 8937 | 0   | 0 |                   | NA |
| MV_Schw | G  | 8938 | 35  | 0 |                   | 1  |
| MV_Schw | T  | 8939 | 10  | 0 |                   | 1  |
| MV_Schw | T  | 8940 | 37  | 1 |                   | 1  |
| MV_Schw | G  | 8941 | 16  | 0 |                   | 1  |
| MV_Schw | C  | 8942 | 60  | 1 |                   | 1  |
| MV_Schw | C  | 8943 | 48  | 1 |                   | 1  |
| MV_Schw | T  | 8944 | 74  | 0 | 0.795198078226602 |    |
| MV_Schw | A  | 8945 | 25  | 0 |                   | 1  |
| MV_Schw | T  | 8946 | 17  | 0 |                   | 1  |
| MV_Schw | A  | 8947 | 47  | 1 |                   | 1  |
| MV_Schw | A  | 8948 | 35  | 1 |                   | 1  |
| MV_Schw | A  | 8949 | 70  | 2 |                   | 1  |
| MV_Schw | G  | 8950 | 25  | 1 |                   | 1  |
| MV_Schw | G  | 8951 | 163 | 3 |                   | 1  |
| MV_Schw | G  | 8952 | 19  | 1 |                   | 1  |
| MV_Schw | G  | 8953 | 35  | 0 |                   | 1  |
| MV_Schw | G  | 8954 | 16  | 1 | 0.950262622850522 |    |
| MV_Schw | T  | 8955 | 72  | 1 |                   | 1  |
| MV_Schw | C  | 8956 | 29  | 0 |                   | 1  |
| MV_Schw | C  | 8957 | 29  | 0 |                   | 1  |
| MV_Schw | C  | 8958 | 50  | 0 | 0.950262622850522 |    |
| MV_Schw | C  | 8959 | 93  | 1 |                   | 1  |
| MV_Schw | A  | 8960 | 136 | 4 | 0.992435787288199 |    |
| MV_Schw | T  | 8961 | 93  | 1 |                   | 1  |
| MV_Schw | C  | 8962 | 149 | 2 |                   | 1  |

|         |   |      |     |   |                   |   |
|---------|---|------|-----|---|-------------------|---|
| MV_Schw | G | 8963 | 31  | 1 |                   | 1 |
| MV_Schw | A | 8964 | 14  | 0 |                   | 1 |
| MV_Schw | A | 8965 | 19  | 1 |                   | 1 |
| MV_Schw | T | 8966 | 29  | 0 |                   | 1 |
| MV_Schw | T | 8967 | 19  | 0 |                   | 1 |
| MV_Schw | A | 8968 | 2   | 0 |                   | 1 |
| MV_Schw | C | 8969 | 27  | 0 |                   | 1 |
| MV_Schw | A | 8970 | 25  | 1 |                   | 1 |
| MV_Schw | A | 8971 | 10  | 1 | 0.822598489333375 |   |
| MV_Schw | G | 8972 | 143 | 2 |                   | 1 |
| MV_Schw | T | 8973 | 4   | 0 |                   | 1 |
| MV_Schw | G | 8974 | 74  | 1 |                   | 1 |
| MV_Schw | G | 8975 | 48  | 1 |                   | 1 |
| MV_Schw | A | 8976 | 23  | 0 |                   | 1 |
| MV_Schw | A | 8977 | 45  | 2 | 0.65158773158174  |   |
| MV_Schw | T | 8978 | 25  | 0 |                   | 1 |
| MV_Schw | G | 8979 | 60  | 1 |                   | 1 |
| MV_Schw | C | 8980 | 78  | 0 | 0.638894311640422 |   |
| MV_Schw | T | 8981 | 85  | 0 | 0.648224297390367 |   |
| MV_Schw | T | 8982 | 45  | 1 |                   | 1 |
| MV_Schw | C | 8983 | 50  | 3 | 0.42458526175556  |   |
| MV_Schw | A | 8984 | 8   | 0 |                   | 1 |
| MV_Schw | C | 8985 | 97  | 0 | 0.503192867159235 |   |
| MV_Schw | A | 8986 | 56  | 0 | 0.950262622850522 |   |
| MV_Schw | T | 8987 | 76  | 1 |                   | 1 |
| MV_Schw | G | 8988 | 37  | 0 |                   | 1 |
| MV_Schw | G | 8989 | 8   | 0 |                   | 1 |
| MV_Schw | G | 8990 | 31  | 1 |                   | 1 |
| MV_Schw | A | 8991 | 2   | 0 |                   | 1 |
| MV_Schw | C | 8992 | 43  | 1 |                   | 1 |
| MV_Schw | C | 8993 | 231 | 3 |                   | 1 |
| MV_Schw | A | 8994 | 120 | 1 |                   | 1 |
| MV_Schw | A | 8995 | 60  | 2 | 0.983041048229953 |   |
| MV_Schw | A | 8996 | 29  | 2 | 0.389821719583598 |   |
| MV_Schw | A | 8997 | 37  | 2 | 0.528591092326266 |   |
| MV_Schw | A | 8998 | 4   | 0 |                   | 1 |

|         |   |      |     |   |                    |   |
|---------|---|------|-----|---|--------------------|---|
| MV_Schw | C | 8999 | 151 | 3 |                    | 1 |
| MV_Schw | T | 9000 | 17  | 0 |                    | 1 |
| MV_Schw | C | 9001 | 62  | 3 | 0.57780206681461   |   |
| MV_Schw | T | 9002 | 16  | 0 |                    | 1 |
| MV_Schw | G | 9003 | 118 | 1 | 0.789229943133706  |   |
| MV_Schw | G | 9004 | 31  | 1 | 0.791667533131283  |   |
| MV_Schw | T | 9005 | 14  | 0 |                    | 1 |
| MV_Schw | G | 9006 | 52  | 2 | 0.78354985902497   |   |
| MV_Schw | C | 9007 | 25  | 0 |                    | 1 |
| MV_Schw | C | 9008 | 159 | 1 | 0.437783686960654  |   |
| MV_Schw | G | 9009 | 357 | 5 | 0.795198078226602  |   |
| MV_Schw | T | 9010 | 16  | 0 |                    | 1 |
| MV_Schw | C | 9011 | 68  | 1 |                    | 1 |
| MV_Schw | A | 9012 | 8   | 0 |                    | 1 |
| MV_Schw | C | 9013 | 153 | 4 |                    | 1 |
| MV_Schw | T | 9014 | 10  | 0 |                    | 1 |
| MV_Schw | T | 9015 | 12  | 0 |                    | 1 |
| MV_Schw | C | 9016 | 37  | 1 | 0.88950624150852   |   |
| MV_Schw | T | 9017 | 19  | 0 |                    | 1 |
| MV_Schw | G | 9018 | 39  | 1 |                    | 1 |
| MV_Schw | T | 9019 | 25  | 0 |                    | 1 |
| MV_Schw | G | 9020 | 58  | 1 |                    | 1 |
| MV_Schw | T | 9021 | 12  | 0 |                    | 1 |
| MV_Schw | G | 9022 | 6   | 0 |                    | 1 |
| MV_Schw | C | 9023 | 56  | 0 | 0.950262622850522  |   |
| MV_Schw | T | 9024 | 31  | 0 |                    | 1 |
| MV_Schw | T | 9025 | 124 | 2 |                    | 1 |
| MV_Schw | G | 9026 | 275 | 0 | 0.0053225710348792 |   |
| MV_Schw | C | 9027 | 297 | 3 | 0.503622649662695  |   |
| MV_Schw | G | 9028 | 66  | 1 |                    | 1 |
| MV_Schw | G | 9029 | 52  | 1 |                    | 1 |
| MV_Schw | A | 9030 | 14  | 1 | 0.944879389258477  |   |
| MV_Schw | C | 9031 | 93  | 3 | 0.747390316041078  |   |
| MV_Schw | T | 9032 | 105 | 0 | 0.37877131423274   |   |
| MV_Schw | C | 9033 | 116 | 1 |                    | 1 |
| MV_Schw | A | 9034 | 33  | 1 |                    | 1 |

|         |   |      |     |   |                   |
|---------|---|------|-----|---|-------------------|
| MV_Schw | G | 9035 | 23  | 1 | 0.658415249679101 |
| MV_Schw | A | 9036 | 74  | 0 | 0.795198078226602 |
| MV_Schw | A | 9037 | 52  | 2 | 0.78354985902497  |
| MV_Schw | T | 9038 | 45  | 0 | 1                 |
| MV_Schw | C | 9039 | 72  | 2 | 1                 |
| MV_Schw | T | 9040 | 12  | 0 | 1                 |
| MV_Schw | G | 9041 | 184 | 5 | 1                 |
| MV_Schw | G | 9042 | 184 | 2 | 0.947544583923452 |
| MV_Schw | T | 9043 | 225 | 6 | 0.983041048229953 |
| MV_Schw | G | 9044 | 258 | 1 | 0.239311637103656 |
| MV_Schw | G | 9045 | 97  | 1 | 0.944879389258477 |
| MV_Schw | A | 9046 | 0   | 0 | 1                 |
| MV_Schw | C | 9047 | 52  | 1 | 1                 |
| MV_Schw | A | 9048 | 48  | 1 | 1                 |
| MV_Schw | T | 9049 | 153 | 3 | 1                 |
| MV_Schw | A | 9050 | 41  | 0 | 1                 |
| MV_Schw | T | 9051 | 8   | 0 | 1                 |
| MV_Schw | C | 9052 | 130 | 1 | 0.658415249679101 |
| MV_Schw | A | 9053 | 62  | 1 | 1                 |
| MV_Schw | C | 9054 | 198 | 3 | 1                 |
| MV_Schw | T | 9055 | 16  | 0 | 1                 |
| MV_Schw | C | 9056 | 25  | 0 | 1                 |
| MV_Schw | A | 9057 | 2   | 0 | 1                 |
| MV_Schw | C | 9058 | 68  | 1 | 1                 |
| MV_Schw | T | 9059 | 12  | 1 | 0.366832525336205 |
| MV_Schw | C | 9060 | 225 | 1 | 0.359577424226080 |
| MV_Schw | T | 9061 | 10  | 0 | 1                 |
| MV_Schw | G | 9062 | 58  | 0 | 0.953489044526869 |
| MV_Schw | G | 9063 | 68  | 0 | 0.789229943133706 |
| MV_Schw | G | 9064 | 114 | 2 | 1                 |
| MV_Schw | A | 9065 | 21  | 1 | 1                 |
| MV_Schw | T | 9066 | 21  | 0 | 1                 |
| MV_Schw | G | 9067 | 19  | 1 | 0.57780206681461  |
| MV_Schw | G | 9068 | 79  | 0 | 0.639207655977387 |
| MV_Schw | T | 9069 | 56  | 1 | 1                 |
| MV_Schw | G | 9070 | 79  | 2 | 1                 |

|         |   |      |     |    |                    |   |
|---------|---|------|-----|----|--------------------|---|
| MV_Schw | G | 9071 | 68  | 2  |                    | 1 |
| MV_Schw | G | 9072 | 14  | 0  |                    | 1 |
| MV_Schw | C | 9073 | 48  | 3  | 0.390345857720356  |   |
| MV_Schw | A | 9074 | 72  | 1  |                    | 1 |
| MV_Schw | T | 9075 | 180 | 3  |                    | 1 |
| MV_Schw | G | 9076 | 54  | 1  |                    | 1 |
| MV_Schw | G | 9077 | 169 | 3  |                    | 1 |
| MV_Schw | G | 9078 | 254 | 1  | 0.066634567324381  |   |
| MV_Schw | A | 9079 | 12  | 0  |                    | 1 |
| MV_Schw | G | 9080 | 657 | 15 |                    | 1 |
| MV_Schw | T | 9081 | 6   | 0  |                    | 1 |
| MV_Schw | C | 9082 | 345 | 5  |                    | 1 |
| MV_Schw | A | 9083 | 97  | 1  | 0.944879389258477  |   |
| MV_Schw | G | 9084 | 448 | 8  |                    | 1 |
| MV_Schw | C | 9085 | 269 | 4  |                    | 1 |
| MV_Schw | T | 9086 | 252 | 3  |                    | 1 |
| MV_Schw | G | 9087 | 264 | 1  | 0.0488236628860313 |   |
| MV_Schw | C | 9088 | 267 | 3  | 0.943932952068623  |   |
| MV_Schw | A | 9089 | 43  | 0  |                    | 1 |
| MV_Schw | C | 9090 | 246 | 3  | 0.789229943133706  |   |
| MV_Schw | A | 9091 | 60  | 1  |                    | 1 |
| MV_Schw | G | 9092 | 89  | 1  |                    | 1 |
| MV_Schw | T | 9093 | 6   | 0  |                    | 1 |
| MV_Schw | C | 9094 | 70  | 0  | 0.789229943133706  |   |
| MV_Schw | A | 9095 | 266 | 5  |                    | 1 |
| MV_Schw | C | 9096 | 134 | 3  |                    | 1 |
| MV_Schw | C | 9097 | 171 | 2  |                    | 1 |
| MV_Schw | C | 9098 | 211 | 6  | 0.875812649023012  |   |
| MV_Schw | G | 9099 | 85  | 0  | 0.648224297390367  |   |
| MV_Schw | G | 9100 | 837 | 10 | 0.214586843368945  |   |
| MV_Schw | G | 9101 | 101 | 1  | 0.944879389258477  |   |
| MV_Schw | A | 9102 | 37  | 1  | 0.88950624150852   |   |
| MV_Schw | A | 9103 | 8   | 0  |                    | 1 |
| MV_Schw | G | 9104 | 203 | 1  | 0.218380248770346  |   |
| MV_Schw | A | 9105 | 43  | 1  |                    | 1 |
| MV_Schw | T | 9106 | 39  | 1  |                    | 1 |

|         |   |      |     |   |                   |
|---------|---|------|-----|---|-------------------|
| MV_Schw | G | 9107 | 78  | 0 | 0.638894311640422 |
| MV_Schw | G | 9108 | 48  | 1 | 1                 |
| MV_Schw | A | 9109 | 114 | 2 | 1                 |
| MV_Schw | A | 9110 | 35  | 1 | 1                 |
| MV_Schw | C | 9111 | 132 | 1 | 0.983041048229953 |
| MV_Schw | C | 9112 | 62  | 0 | 0.789229943133706 |
| MV_Schw | A | 9113 | 8   | 0 | 1                 |
| MV_Schw | A | 9114 | 318 | 7 | 1                 |
| MV_Schw | T | 9115 | 95  | 0 | 0.499662168427985 |
| MV_Schw | C | 9116 | 698 | 7 | 0.08215368620616  |
| MV_Schw | G | 9117 | 114 | 1 | 1                 |
| MV_Schw | C | 9118 | 89  | 1 | 1                 |
| MV_Schw | A | 9119 | 27  | 1 | 1                 |
| MV_Schw | G | 9120 | 289 | 6 | 1                 |
| MV_Schw | A | 9121 | 10  | 0 | 1                 |
| MV_Schw | T | 9122 | 81  | 2 | 1                 |
| MV_Schw | A | 9123 | 25  | 0 | 1                 |
| MV_Schw | G | 9124 | 33  | 1 | 1                 |
| MV_Schw | G | 9125 | 56  | 0 | 0.950262622850522 |
| MV_Schw | G | 9126 | 17  | 0 | 1                 |
| MV_Schw | C | 9127 | 295 | 5 | 1                 |
| MV_Schw | T | 9128 | 45  | 0 | 1                 |
| MV_Schw | G | 9129 | 141 | 1 | 0.542247232322076 |
| MV_Schw | C | 9130 | 81  | 0 | 0.641186461810141 |
| MV_Schw | T | 9131 | 118 | 1 | 1                 |
| MV_Schw | A | 9132 | 112 | 1 | 0.789229943133706 |
| MV_Schw | G | 9133 | 143 | 1 | 0.542465567021569 |
| MV_Schw | T | 9134 | 29  | 0 | 1                 |
| MV_Schw | G | 9135 | 130 | 0 | 0.222002676269896 |
| MV_Schw | A | 9136 | 68  | 1 | 1                 |
| MV_Schw | A | 9137 | 45  | 1 | 1                 |
| MV_Schw | C | 9138 | 202 | 2 | 0.822598489333375 |
| MV_Schw | C | 9139 | 97  | 0 | 0.503192867159235 |
| MV_Schw | A | 9140 | 25  | 1 | 1                 |
| MV_Schw | A | 9141 | 79  | 1 | 1                 |
| MV_Schw | T | 9142 | 16  | 0 | 1                 |

|         |   |      |     |   |                   |
|---------|---|------|-----|---|-------------------|
| MV_Schw | C | 9143 | 143 | 0 | 0.161503851613234 |
| MV_Schw | A | 9144 | 21  | 0 | 1                 |
| MV_Schw | C | 9145 | 122 | 0 | 0.298485329352986 |
| MV_Schw | A | 9146 | 17  | 1 | 0.983041048229953 |
| MV_Schw | T | 9147 | 27  | 1 | 1                 |
| MV_Schw | G | 9148 | 23  | 1 | 0.658415249679101 |
| MV_Schw | A | 9149 | 6   | 0 | 1                 |
| MV_Schw | T | 9150 | 39  | 0 | 1                 |
| MV_Schw | G | 9151 | 52  | 0 | 0.950262622850522 |
| MV_Schw | T | 9152 | 0   | 0 | 1                 |
| MV_Schw | C | 9153 | 43  | 0 | 1                 |
| MV_Schw | A | 9154 | 17  | 0 | 1                 |
| MV_Schw | C | 9155 | 384 | 4 | 0.445919862395878 |
| MV_Schw | C | 9156 | 50  | 0 | 0.950262622850522 |
| MV_Schw | C | 9157 | 302 | 0 | 0.002551082569142 |
| MV_Schw | A | 9158 | 31  | 0 | 1                 |
| MV_Schw | G | 9159 | 89  | 2 | 1                 |
| MV_Schw | A | 9160 | 14  | 0 | 1                 |
| MV_Schw | C | 9161 | 122 | 1 | 0.791667533131283 |
| MV_Schw | A | 9162 | 33  | 0 | 1                 |
| MV_Schw | T | 9163 | 4   | 0 | 1                 |
| MV_Schw | C | 9164 | 68  | 0 | 0.789229943133706 |
| MV_Schw | A | 9165 | 45  | 2 | 0.65158773158174  |
| MV_Schw | G | 9166 | 264 | 3 | 0.684463566136253 |
| MV_Schw | G | 9167 | 31  | 1 | 1                 |
| MV_Schw | C | 9168 | 331 | 6 | 1                 |
| MV_Schw | A | 9169 | 12  | 0 | 1                 |
| MV_Schw | T | 9170 | 6   | 0 | 1                 |
| MV_Schw | A | 9171 | 43  | 0 | 1                 |
| MV_Schw | C | 9172 | 43  | 1 | 0.950262622850522 |
| MV_Schw | C | 9173 | 35  | 1 | 1                 |
| MV_Schw | C | 9174 | 45  | 1 | 1                 |
| MV_Schw | A | 9175 | 83  | 3 | 0.678058690427187 |
| MV_Schw | C | 9176 | 83  | 1 | 1                 |
| MV_Schw | T | 9177 | 48  | 2 | 0.709032941865358 |
| MV_Schw | A | 9178 | 2   | 0 | 1                 |



|         |    |      |     |   |                      |    |
|---------|----|------|-----|---|----------------------|----|
| MV_Schw | G  | 9179 | 68  | 2 |                      | 1  |
| MV_Schw | T  | 9180 | 23  | 0 |                      | 1  |
| MV_Schw | G  | 9181 | 203 | 2 | 0.822598489333375    |    |
| MV_Schw | T  | 9182 | 17  | 0 |                      | 1  |
| MV_Schw | G  | 9183 | 68  | 2 |                      | 1  |
| MV_Schw | A  | 9184 | 29  | 2 | 0.389821719583598    |    |
| MV_Schw | A  | 9185 | 31  | 2 | 0.428411386231373    |    |
| MV_Schw | A  | 9186 | 107 | 3 | 0.950262622850522    |    |
| MV_Schw | T  | 9187 | 169 | 4 |                      | 1  |
| MV_Schw | A  | 9188 | 25  | 0 |                      | 1  |
| MV_Schw | G  | 9189 | 47  | 6 | 0.000967092115797442 |    |
| MV_Schw | A  | 9190 | 2   | 1 | 0.491835918445353    |    |
| MV_Schw | C  | 9191 | 79  | 5 | 0.0553595256463226   |    |
| MV_Schw | A  | 9192 | 31  | 1 |                      | 1  |
| MV_Schw | T  | 9193 | 54  | 1 |                      | 1  |
| MV_Schw | C  | 9194 | 52  | 1 |                      | 1  |
| MV_Schw | A  | 9195 | 4   | 0 |                      | 1  |
| MV_Schw | G  | 9196 | 112 | 6 | 0.107199991629516    |    |
| MV_Schw | A  | 9197 | 4   | 1 | 0.136107188572645    |    |
| MV_Schw | A  | 9198 | 23  | 1 |                      | 1  |
| MV_Schw | T  | 9199 | 6   | 0 |                      | 1  |
| MV_Schw | T  | 9200 | 4   | 0 |                      | 1  |
| MV_Schw | NA | 9201 | 0   | 0 |                      | NA |
| MV_Schw | A  | 9202 | 17  | 0 |                      | 1  |
| MV_Schw | G  | 9203 | 248 | 2 | 0.528869794103543    |    |
| MV_Schw | A  | 9204 | 8   | 0 |                      | 1  |
| MV_Schw | A  | 9205 | 17  | 1 | 0.983041048229953    |    |
| MV_Schw | A  | 9206 | 2   | 0 |                      | 1  |
| MV_Schw | A  | 9207 | 6   | 0 |                      | 1  |
| MV_Schw | A  | 9208 | 2   | 0 |                      | 1  |
| MV_Schw | C  | 9209 | 81  | 1 |                      | 1  |
| MV_Schw | G  | 9210 | 81  | 0 | 0.641186461810141    |    |
| MV_Schw | T  | 9211 | 4   | 0 |                      | 1  |
| MV_Schw | A  | 9212 | 27  | 0 |                      | 1  |
| MV_Schw | G  | 9213 | 16  | 0 |                      | 1  |
| MV_Schw | G  | 9214 | 8   | 0 |                      | 1  |

|         |   |      |     |   |                    |
|---------|---|------|-----|---|--------------------|
| MV_Schw | G | 9215 | 147 | 1 | 0.547090293958293  |
| MV_Schw | T | 9216 | 17  | 0 | 1                  |
| MV_Schw | C | 9217 | 21  | 0 | 1                  |
| MV_Schw | C | 9218 | 70  | 0 | 0.789229943133706  |
| MV_Schw | A | 9219 | 43  | 1 | 1                  |
| MV_Schw | A | 9220 | 93  | 1 | 1                  |
| MV_Schw | G | 9221 | 295 | 7 | 1                  |
| MV_Schw | T | 9222 | 56  | 1 | 1                  |
| MV_Schw | G | 9223 | 41  | 1 | 0.945767847051808  |
| MV_Schw | G | 9224 | 198 | 1 | 0.54661929710701   |
| MV_Schw | T | 9225 | 29  | 1 | 0.789229943133706  |
| MV_Schw | T | 9226 | 27  | 1 | 1                  |
| MV_Schw | C | 9227 | 105 | 1 | 0.944944073306986  |
| MV_Schw | C | 9228 | 124 | 1 | 1                  |
| MV_Schw | C | 9229 | 256 | 2 | 0.437582500382461  |
| MV_Schw | C | 9230 | 45  | 0 | 1                  |
| MV_Schw | G | 9231 | 640 | 7 | 0.318404918524533  |
| MV_Schw | T | 9232 | 14  | 0 | 1                  |
| MV_Schw | T | 9233 | 159 | 1 | 0.437783686960654  |
| MV_Schw | A | 9234 | 37  | 0 | 1                  |
| MV_Schw | T | 9235 | 48  | 1 | 1                  |
| MV_Schw | G | 9236 | 87  | 1 | 1                  |
| MV_Schw | G | 9237 | 37  | 0 | 1                  |
| MV_Schw | A | 9238 | 14  | 0 | 1                  |
| MV_Schw | C | 9239 | 112 | 2 | 1                  |
| MV_Schw | T | 9240 | 78  | 1 | 1                  |
| MV_Schw | C | 9241 | 29  | 0 | 1                  |
| MV_Schw | G | 9242 | 215 | 0 | 0.0320573639632113 |
| MV_Schw | C | 9243 | 47  | 1 | 1                  |
| MV_Schw | T | 9244 | 118 | 0 | 0.296802961873227  |
| MV_Schw | A | 9245 | 31  | 0 | 1                  |
| MV_Schw | T | 9246 | 10  | 0 | 1                  |
| MV_Schw | C | 9247 | 37  | 0 | 1                  |
| MV_Schw | T | 9248 | 41  | 1 | 1                  |
| MV_Schw | G | 9249 | 196 | 0 | 0.0437133877334182 |
| MV_Schw | T | 9250 | 2   | 0 | 1                  |

|         |   |      |     |   |                      |   |
|---------|---|------|-----|---|----------------------|---|
| MV_Schw | C | 9251 | 29  | 1 |                      | 1 |
| MV_Schw | A | 9252 | 27  | 0 |                      | 1 |
| MV_Schw | A | 9253 | 70  | 1 |                      | 1 |
| MV_Schw | C | 9254 | 107 | 1 | 0.945767847051808    |   |
| MV_Schw | C | 9255 | 78  | 0 | 0.638894311640422    |   |
| MV_Schw | A | 9256 | 23  | 0 |                      | 1 |
| MV_Schw | G | 9257 | 70  | 0 | 0.789229943133706    |   |
| MV_Schw | A | 9258 | 31  | 0 |                      | 1 |
| MV_Schw | T | 9259 | 41  | 3 | 0.297586725038221    |   |
| MV_Schw | C | 9260 | 120 | 0 | 0.297586725038221    |   |
| MV_Schw | T | 9261 | 12  | 0 |                      | 1 |
| MV_Schw | T | 9262 | 48  | 0 | 0.950262622850522    |   |
| MV_Schw | A | 9263 | 25  | 0 |                      | 1 |
| MV_Schw | T | 9264 | 29  | 0 |                      | 1 |
| MV_Schw | A | 9265 | 4   | 0 |                      | 1 |
| MV_Schw | C | 9266 | 33  | 0 |                      | 1 |
| MV_Schw | C | 9267 | 62  | 0 | 0.789229943133706    |   |
| MV_Schw | C | 9268 | 667 | 2 | 0.000103795185350739 |   |
| MV_Schw | T | 9269 | 85  | 1 |                      | 1 |
| MV_Schw | G | 9270 | 109 | 0 | 0.381672248067152    |   |
| MV_Schw | A | 9271 | 79  | 0 | 0.639207655977387    |   |
| MV_Schw | A | 9272 | 39  | 1 |                      | 1 |
| MV_Schw | G | 9273 | 126 | 2 |                      | 1 |
| MV_Schw | T | 9274 | 14  | 0 |                      | 1 |
| MV_Schw | T | 9275 | 2   | 0 |                      | 1 |
| MV_Schw | C | 9276 | 68  | 0 | 0.789229943133706    |   |
| MV_Schw | A | 9277 | 45  | 1 |                      | 1 |
| MV_Schw | C | 9278 | 419 | 3 | 0.0728223341477839   |   |
| MV_Schw | C | 9279 | 110 | 1 | 0.789229943133706    |   |
| MV_Schw | T | 9280 | 16  | 0 |                      | 1 |
| MV_Schw | A | 9281 | 12  | 0 |                      | 1 |
| MV_Schw | G | 9282 | 23  | 0 |                      | 1 |
| MV_Schw | A | 9283 | 56  | 0 | 0.950262622850522    |   |
| MV_Schw | T | 9284 | 64  | 1 |                      | 1 |
| MV_Schw | A | 9285 | 6   | 0 |                      | 1 |
| MV_Schw | G | 9286 | 48  | 0 | 0.950262622850522    |   |

|         |   |      |     |   |                     |   |
|---------|---|------|-----|---|---------------------|---|
| MV_Schw | C | 9287 | 68  | 1 |                     | 1 |
| MV_Schw | C | 9288 | 312 | 3 | 0.647007014396193   |   |
| MV_Schw | C | 9289 | 273 | 1 | 0.0503522340284269  |   |
| MV_Schw | G | 9290 | 89  | 0 | 0.497615650989996   |   |
| MV_Schw | A | 9291 | 62  | 1 |                     | 1 |
| MV_Schw | T | 9292 | 56  | 1 |                     | 1 |
| MV_Schw | A | 9293 | 29  | 0 |                     | 1 |
| MV_Schw | G | 9294 | 134 | 1 | 0.66330042087892    |   |
| MV_Schw | T | 9295 | 10  | 0 |                     | 1 |
| MV_Schw | T | 9296 | 45  | 1 |                     | 1 |
| MV_Schw | A | 9297 | 29  | 1 |                     | 1 |
| MV_Schw | C | 9298 | 23  | 0 |                     | 1 |
| MV_Schw | C | 9299 | 167 | 1 | 0.788293646497135   |   |
| MV_Schw | A | 9300 | 16  | 0 |                     | 1 |
| MV_Schw | A | 9301 | 27  | 0 |                     | 1 |
| MV_Schw | T | 9302 | 39  | 0 |                     | 1 |
| MV_Schw | A | 9303 | 31  | 0 |                     | 1 |
| MV_Schw | A | 9304 | 21  | 0 |                     | 1 |
| MV_Schw | G | 9305 | 68  | 0 | 0.789229943133706   |   |
| MV_Schw | A | 9306 | 16  | 0 |                     | 1 |
| MV_Schw | T | 9307 | 23  | 0 |                     | 1 |
| MV_Schw | A | 9308 | 23  | 0 |                     | 1 |
| MV_Schw | G | 9309 | 41  | 0 |                     | 1 |
| MV_Schw | T | 9310 | 110 | 1 |                     | 1 |
| MV_Schw | A | 9311 | 33  | 0 |                     | 1 |
| MV_Schw | G | 9312 | 172 | 3 |                     | 1 |
| MV_Schw | C | 9313 | 78  | 0 | 0.638894311640422   |   |
| MV_Schw | C | 9314 | 17  | 0 |                     | 1 |
| MV_Schw | A | 9315 | 45  | 0 |                     | 1 |
| MV_Schw | T | 9316 | 41  | 0 |                     | 1 |
| MV_Schw | C | 9317 | 81  | 0 | 0.641186461810141   |   |
| MV_Schw | C | 9318 | 297 | 0 | 0.00386997644741331 |   |
| MV_Schw | T | 9319 | 43  | 0 |                     | 1 |
| MV_Schw | G | 9320 | 271 | 1 | 0.187874728258615   |   |
| MV_Schw | G | 9321 | 56  | 1 |                     | 1 |
| MV_Schw | A | 9322 | 33  | 0 |                     | 1 |

|         |    |      |     |   |                      |    |
|---------|----|------|-----|---|----------------------|----|
| MV_Schw | G  | 9323 | 124 | 1 |                      | 1  |
| MV_Schw | T  | 9324 | 2   | 0 |                      | 1  |
| MV_Schw | A  | 9325 | 2   | 0 |                      | 1  |
| MV_Schw | T  | 9326 | 29  | 0 |                      | 1  |
| MV_Schw | G  | 9327 | 56  | 0 | 0.950262622850522    |    |
| MV_Schw | C  | 9328 | 329 | 1 | 0.0458957151329842   |    |
| MV_Schw | T  | 9329 | 37  | 0 |                      | 1  |
| MV_Schw | C  | 9330 | 116 | 0 | 0.296710762771661    |    |
| MV_Schw | G  | 9331 | 417 | 0 | 0.000140843514964297 |    |
| MV_Schw | A  | 9332 | 29  | 0 |                      | 1  |
| MV_Schw | G  | 9333 | 405 | 7 |                      | 1  |
| MV_Schw | T  | 9334 | 4   | 0 |                      | 1  |
| MV_Schw | C  | 9335 | 23  | 0 |                      | 1  |
| MV_Schw | C  | 9336 | 31  | 0 |                      | 1  |
| MV_Schw | C  | 9337 | 110 | 0 | 0.385864542883514    |    |
| MV_Schw | T  | 9338 | 120 | 1 |                      | 1  |
| MV_Schw | C  | 9339 | 136 | 0 | 0.224063006917908    |    |
| MV_Schw | A  | 9340 | 14  | 1 | 0.944879389258477    |    |
| MV_Schw | C  | 9341 | 124 | 2 |                      | 1  |
| MV_Schw | G  | 9342 | 17  | 0 |                      | 1  |
| MV_Schw | C  | 9343 | 39  | 1 | 0.9314909603024      |    |
| MV_Schw | T  | 9344 | 10  | 1 | 0.822598489333375    |    |
| MV_Schw | T  | 9345 | 4   | 0 |                      | 1  |
| MV_Schw | A  | 9346 | 19  | 0 |                      | 1  |
| MV_Schw | C  | 9347 | 62  | 1 |                      | 1  |
| MV_Schw | NA | 9348 | 0   | 0 |                      | NA |
| MV_Schw | G  | 9349 | 33  | 0 |                      | 1  |
| MV_Schw | C  | 9350 | 37  | 0 |                      | 1  |
| MV_Schw | C  | 9351 | 62  | 0 | 0.789229943133706    |    |
| MV_Schw | T  | 9352 | 29  | 0 |                      | 1  |
| MV_Schw | G  | 9353 | 136 | 2 |                      | 1  |
| MV_Schw | G  | 9354 | 221 | 2 | 0.746970975838775    |    |
| MV_Schw | A  | 9355 | 17  | 0 |                      | 1  |
| MV_Schw | G  | 9356 | 126 | 1 |                      | 1  |
| MV_Schw | G  | 9357 | 25  | 1 |                      | 1  |
| MV_Schw | A  | 9358 | 14  | 0 |                      | 1  |

|         |   |      |     |   |                     |   |
|---------|---|------|-----|---|---------------------|---|
| MV_Schw | C | 9359 | 45  | 0 |                     | 1 |
| MV_Schw | C | 9360 | 81  | 0 | 0.641186461810141   |   |
| MV_Schw | C | 9361 | 174 | 1 | 0.648224297390367   |   |
| MV_Schw | T | 9362 | 27  | 1 |                     | 1 |
| MV_Schw | A | 9363 | 19  | 0 |                     | 1 |
| MV_Schw | C | 9364 | 151 | 2 |                     | 1 |
| MV_Schw | A | 9365 | 14  | 0 |                     | 1 |
| MV_Schw | C | 9366 | 83  | 1 |                     | 1 |
| MV_Schw | T | 9367 | 8   | 0 |                     | 1 |
| MV_Schw | G | 9368 | 23  | 0 |                     | 1 |
| MV_Schw | T | 9369 | 29  | 0 |                     | 1 |
| MV_Schw | G | 9370 | 176 | 1 | 0.34703042205032    |   |
| MV_Schw | T | 9371 | 58  | 0 | 0.953489044526869   |   |
| MV_Schw | C | 9372 | 172 | 0 | 0.0854265304031386  |   |
| MV_Schw | A | 9373 | 165 | 0 | 0.121895614141351   |   |
| MV_Schw | G | 9374 | 351 | 1 | 0.00720618061335525 |   |
| MV_Schw | A | 9375 | 21  | 0 |                     | 1 |
| MV_Schw | A | 9376 | 132 | 1 | 0.659520109379356   |   |
| MV_Schw | C | 9377 | 188 | 2 | 0.950262622850522   |   |
| MV_Schw | A | 9378 | 31  | 0 |                     | 1 |
| MV_Schw | T | 9379 | 23  | 0 |                     | 1 |
| MV_Schw | C | 9380 | 132 | 1 | 0.983041048229953   |   |
| MV_Schw | A | 9381 | 126 | 1 | 0.658415249679101   |   |
| MV_Schw | A | 9382 | 41  | 0 |                     | 1 |
| MV_Schw | G | 9383 | 188 | 2 | 0.950262622850522   |   |
| MV_Schw | C | 9384 | 510 | 3 | 0.0350079134757893  |   |
| MV_Schw | A | 9385 | 25  | 0 |                     | 1 |
| MV_Schw | C | 9386 | 35  | 1 |                     | 1 |
| MV_Schw | C | 9387 | 37  | 1 |                     | 1 |
| MV_Schw | G | 9388 | 105 | 0 | 0.37877131423274    |   |
| MV_Schw | C | 9389 | 39  | 0 |                     | 1 |
| MV_Schw | C | 9390 | 29  | 0 |                     | 1 |
| MV_Schw | T | 9391 | 81  | 0 | 0.641186461810141   |   |
| MV_Schw | A | 9392 | 89  | 1 |                     | 1 |
| MV_Schw | A | 9393 | 8   | 0 |                     | 1 |
| MV_Schw | A | 9394 | 12  | 0 |                     | 1 |

|         |    |      |     |   |                   |    |
|---------|----|------|-----|---|-------------------|----|
| MV_Schw | A  | 9395 | 25  | 0 |                   | 1  |
| MV_Schw | A  | 9396 | 35  | 1 |                   | 1  |
| MV_Schw | A  | 9397 | 16  | 0 |                   | 1  |
| MV_Schw | C  | 9398 | 124 | 1 |                   | 1  |
| MV_Schw | G  | 9399 | 101 | 2 |                   | 1  |
| MV_Schw | G  | 9400 | 58  | 1 |                   | 1  |
| MV_Schw | A  | 9401 | 23  | 0 |                   | 1  |
| MV_Schw | T  | 9402 | 6   | 0 |                   | 1  |
| MV_Schw | T  | 9403 | 17  | 0 |                   | 1  |
| MV_Schw | T  | 9404 | 14  | 0 |                   | 1  |
| MV_Schw | T  | 9405 | 14  | 0 |                   | 1  |
| MV_Schw | C  | 9406 | 17  | 0 |                   | 1  |
| MV_Schw | C  | 9407 | 308 | 4 | 0.863499923807603 |    |
| MV_Schw | A  | 9408 | 10  | 0 |                   | 1  |
| MV_Schw | A  | 9409 | 14  | 0 |                   | 1  |
| MV_Schw | C  | 9410 | 17  | 0 |                   | 1  |
| MV_Schw | C  | 9411 | 16  | 0 |                   | 1  |
| MV_Schw | A  | 9412 | 8   | 0 |                   | 1  |
| MV_Schw | A  | 9413 | 4   | 0 |                   | 1  |
| MV_Schw | A  | 9414 | 17  | 0 |                   | 1  |
| MV_Schw | T  | 9415 | 21  | 1 |                   | 1  |
| MV_Schw | G  | 9416 | 4   | 0 |                   | 1  |
| MV_Schw | A  | 9417 | 4   | 0 |                   | 1  |
| MV_Schw | T  | 9418 | 2   | 0 |                   | 1  |
| MV_Schw | T  | 9419 | 8   | 0 |                   | 1  |
| MV_Schw | A  | 9420 | 4   | 0 |                   | 1  |
| MV_Schw | T  | 9421 | 4   | 0 |                   | 1  |
| MV_Schw | A  | 9422 | 101 | 1 | 0.944879389258477 |    |
| MV_Schw | A  | 9423 | 8   | 0 |                   | 1  |
| MV_Schw | A  | 9424 | 16  | 0 |                   | 1  |
| MV_Schw | C  | 9425 | 56  | 0 | 0.950262622850522 |    |
| MV_Schw | A  | 9426 | 6   | 0 |                   | 1  |
| MV_Schw | NA | 9427 | 0   | 0 |                   | NA |
| MV_Schw | T  | 9428 | 17  | 0 |                   | 1  |
| MV_Schw | G  | 9429 | 134 | 3 |                   | 1  |
| MV_Schw | T  | 9430 | 29  | 1 | 0.789229943133706 |    |

|         |   |      |     |   |                   |   |
|---------|---|------|-----|---|-------------------|---|
| MV_Schw | G | 9431 | 29  | 0 |                   | 1 |
| MV_Schw | G | 9432 | 21  | 0 |                   | 1 |
| MV_Schw | A | 9433 | 16  | 0 |                   | 1 |
| MV_Schw | A | 9434 | 12  | 0 |                   | 1 |
| MV_Schw | G | 9435 | 120 | 1 |                   | 1 |
| MV_Schw | T | 9436 | 23  | 1 |                   | 1 |
| MV_Schw | T | 9437 | 182 | 1 | 0.65158773158174  |   |
| MV_Schw | G | 9438 | 105 | 1 |                   | 1 |
| MV_Schw | G | 9439 | 132 | 1 | 0.983041048229953 |   |
| MV_Schw | G | 9440 | 47  | 0 |                   | 1 |
| MV_Schw | A | 9441 | 12  | 0 |                   | 1 |
| MV_Schw | A | 9442 | 70  | 0 | 0.789229943133706 |   |
| MV_Schw | T | 9443 | 12  | 0 |                   | 1 |
| MV_Schw | G | 9444 | 81  | 0 | 0.641186461810141 |   |
| MV_Schw | T | 9445 | 8   | 0 |                   | 1 |
| MV_Schw | C | 9446 | 93  | 1 |                   | 1 |
| MV_Schw | A | 9447 | 401 | 7 |                   | 1 |
| MV_Schw | T | 9448 | 68  | 2 |                   | 1 |
| MV_Schw | C | 9449 | 169 | 1 | 0.341186273229673 |   |
| MV_Schw | A | 9450 | 12  | 0 |                   | 1 |
| MV_Schw | A | 9451 | 6   | 0 |                   | 1 |
| MV_Schw | G | 9452 | 153 | 1 | 0.436311974989592 |   |
| MV_Schw | T | 9453 | 23  | 0 |                   | 1 |
| MV_Schw | C | 9454 | 47  | 1 |                   | 1 |
| MV_Schw | C | 9455 | 35  | 1 |                   | 1 |
| MV_Schw | A | 9456 | 19  | 1 | 0.57780206681461  |   |
| MV_Schw | A | 9457 | 31  | 0 |                   | 1 |
| MV_Schw | G | 9458 | 101 | 1 | 0.944879389258477 |   |
| MV_Schw | C | 9459 | 83  | 1 |                   | 1 |
| MV_Schw | T | 9460 | 14  | 0 |                   | 1 |
| MV_Schw | T | 9461 | 4   | 0 |                   | 1 |
| MV_Schw | A | 9462 | 25  | 0 |                   | 1 |
| MV_Schw | G | 9463 | 130 | 2 |                   | 1 |
| MV_Schw | G | 9464 | 33  | 0 |                   | 1 |
| MV_Schw | A | 9465 | 23  | 0 |                   | 1 |
| MV_Schw | G | 9466 | 43  | 0 |                   | 1 |



|         |   |      |     |   |                   |
|---------|---|------|-----|---|-------------------|
| MV_Schw | T | 9467 | 4   | 0 | 1                 |
| MV_Schw | T | 9468 | 8   | 0 | 1                 |
| MV_Schw | A | 9469 | 85  | 0 | 0.648224297390367 |
| MV_Schw | T | 9470 | 39  | 0 | 1                 |
| MV_Schw | C | 9471 | 143 | 1 | 0.542465567021569 |
| MV_Schw | C | 9472 | 97  | 1 | 0.944879389258477 |
| MV_Schw | G | 9473 | 165 | 2 | 1                 |
| MV_Schw | G | 9474 | 95  | 0 | 0.499662168427985 |
| MV_Schw | C | 9475 | 126 | 1 | 1                 |
| MV_Schw | C | 9476 | 68  | 0 | 0.789229943133706 |
| MV_Schw | C | 9477 | 56  | 0 | 0.950262622850522 |
| MV_Schw | A | 9478 | 6   | 0 | 1                 |
| MV_Schw | C | 9479 | 54  | 0 | 0.950262622850522 |
| MV_Schw | T | 9480 | 14  | 0 | 1                 |
| MV_Schw | C | 9481 | 60  | 1 | 1                 |
| MV_Schw | T | 9482 | 17  | 0 | 1                 |
| MV_Schw | C | 9483 | 23  | 0 | 1                 |
| MV_Schw | A | 9484 | 54  | 0 | 0.950262622850522 |
| MV_Schw | T | 9485 | 41  | 0 | 1                 |
| MV_Schw | A | 9486 | 21  | 1 | 0.632968068765344 |
| MV_Schw | T | 9487 | 6   | 0 | 1                 |
| MV_Schw | T | 9488 | 72  | 0 | 0.791667533131283 |
| MV_Schw | C | 9489 | 6   | 1 | 0.704667204683568 |
| MV_Schw | C | 9490 | 180 | 1 | 0.649372270546162 |
| MV_Schw | A | 9491 | 37  | 1 | 0.88950624150852  |
| MV_Schw | T | 9492 | 35  | 0 | 1                 |
| MV_Schw | A | 9493 | 6   | 1 | 0.704667204683568 |
| MV_Schw | T | 9494 | 10  | 0 | 1                 |
| MV_Schw | C | 9495 | 23  | 0 | 1                 |
| MV_Schw | C | 9496 | 10  | 0 | 1                 |
| MV_Schw | A | 9497 | 43  | 0 | 1                 |
| MV_Schw | A | 9498 | 16  | 1 | 0.950262622850522 |
| MV_Schw | A | 9499 | 85  | 1 | 1                 |
| MV_Schw | T | 9500 | 19  | 0 | 1                 |
| MV_Schw | T | 9501 | 17  | 0 | 1                 |
| MV_Schw | G | 9502 | 16  | 1 | 0.950262622850522 |

|         |    |      |     |   |                    |    |
|---------|----|------|-----|---|--------------------|----|
| MV_Schw | T  | 9503 | 6   | 0 |                    | 1  |
| MV_Schw | A  | 9504 | 21  | 0 |                    | 1  |
| MV_Schw | A  | 9505 | 31  | 0 |                    | 1  |
| MV_Schw | T  | 9506 | 19  | 0 |                    | 1  |
| MV_Schw | C  | 9507 | 29  | 1 |                    | 1  |
| MV_Schw | A  | 9508 | 10  | 0 |                    | 1  |
| MV_Schw | G  | 9509 | 43  | 0 |                    | 1  |
| MV_Schw | G  | 9510 | 233 | 0 | 0.0235202211426643 |    |
| MV_Schw | A  | 9511 | 35  | 1 |                    | 1  |
| MV_Schw | T  | 9512 | 21  | 0 |                    | 1  |
| MV_Schw | T  | 9513 | 2   | 0 |                    | 1  |
| MV_Schw | T  | 9514 | 10  | 0 |                    | 1  |
| MV_Schw | A  | 9515 | 66  | 1 |                    | 1  |
| MV_Schw | T  | 9516 | 6   | 0 |                    | 1  |
| MV_Schw | T  | 9517 | 79  | 1 |                    | 1  |
| MV_Schw | T  | 9518 | 6   | 0 |                    | 1  |
| MV_Schw | A  | 9519 | 2   | 0 |                    | 1  |
| MV_Schw | NA | 9520 | 0   | 0 |                    | NA |
| MV_Schw | C  | 9521 | 31  | 0 |                    | 1  |
| MV_Schw | A  | 9522 | 8   | 0 |                    | 1  |
| MV_Schw | T  | 9523 | 8   | 1 | 0.789229943133706  |    |
| MV_Schw | A  | 9524 | 12  | 0 |                    | 1  |
| MV_Schw | G  | 9525 | 16  | 0 |                    | 1  |
| MV_Schw | A  | 9526 | 25  | 0 |                    | 1  |
| MV_Schw | A  | 9527 | 10  | 0 |                    | 1  |
| MV_Schw | G  | 9528 | 50  | 1 |                    | 1  |
| MV_Schw | NA | 9529 | 0   | 0 |                    | NA |
| MV_Schw | C  | 9530 | 149 | 0 | 0.164331455962041  |    |
| MV_Schw | A  | 9531 | 33  | 0 |                    | 1  |
| MV_Schw | A  | 9532 | 8   | 0 |                    | 1  |
| MV_Schw | A  | 9533 | 33  | 0 |                    | 1  |
| MV_Schw | G  | 9534 | 37  | 1 | 0.88950624150852   |    |
| MV_Schw | A  | 9535 | 14  | 0 |                    | 1  |
| MV_Schw | G  | 9536 | 33  | 1 |                    | 1  |
| MV_Schw | T  | 9537 | 10  | 0 |                    | 1  |
| MV_Schw | C  | 9538 | 87  | 1 |                    | 1  |

|         |   |      |     |    |                    |   |
|---------|---|------|-----|----|--------------------|---|
| MV_Schw | A | 9539 | 41  | 1  |                    | 1 |
| MV_Schw | A | 9540 | 14  | 0  |                    | 1 |
| MV_Schw | C | 9541 | 159 | 2  |                    | 1 |
| MV_Schw | G | 9542 | 76  | 2  |                    | 1 |
| MV_Schw | A | 9543 | 6   | 0  |                    | 1 |
| MV_Schw | G | 9544 | 659 | 11 | 0.960519793657536  |   |
| MV_Schw | G | 9545 | 27  | 1  |                    | 1 |
| MV_Schw | A | 9546 | 29  | 1  | 0.789229943133706  |   |
| MV_Schw | A | 9547 | 33  | 0  |                    | 1 |
| MV_Schw | G | 9548 | 50  | 3  | 0.199842243730937  |   |
| MV_Schw | A | 9549 | 19  | 0  |                    | 1 |
| MV_Schw | T | 9550 | 37  | 0  |                    | 1 |
| MV_Schw | C | 9551 | 169 | 1  | 0.789229943133706  |   |
| MV_Schw | C | 9552 | 331 | 1  | 0.0459130820227263 |   |
| MV_Schw | G | 9553 | 380 | 1  | 0.0193508689217628 |   |
| MV_Schw | T | 9554 | 21  | 0  |                    | 1 |
| MV_Schw | G | 9555 | 300 | 3  | 0.751501025978229  |   |
| MV_Schw | A | 9556 | 27  | 0  |                    | 1 |
| MV_Schw | A | 9557 | 12  | 0  |                    | 1 |
| MV_Schw | C | 9558 | 41  | 3  | 0.297586725038221  |   |
| MV_Schw | T | 9559 | 8   | 0  |                    | 1 |
| MV_Schw | C | 9560 | 21  | 1  | 0.632968068765344  |   |
| MV_Schw | C | 9561 | 151 | 3  |                    | 1 |
| MV_Schw | T | 9562 | 16  | 1  | 0.950262622850522  |   |
| MV_Schw | C | 9563 | 161 | 0  | 0.119516505590852  |   |
| MV_Schw | A | 9564 | 76  | 0  | 0.638894311640422  |   |
| MV_Schw | A | 9565 | 16  | 1  | 0.950262622850522  |   |
| MV_Schw | A | 9566 | 2   | 0  |                    | 1 |
| MV_Schw | A | 9567 | 17  | 0  |                    | 1 |
| MV_Schw | A | 9568 | 39  | 1  | 0.9314909603024    |   |
| MV_Schw | G | 9569 | 165 | 6  | 0.497615650989996  |   |
| MV_Schw | G | 9570 | 29  | 1  | 0.789229943133706  |   |
| MV_Schw | G | 9571 | 78  | 2  |                    | 1 |
| MV_Schw | G | 9572 | 21  | 0  |                    | 1 |
| MV_Schw | A | 9573 | 4   | 0  |                    | 1 |
| MV_Schw | A | 9574 | 50  | 0  | 0.950262622850522  |   |

|         |    |      |     |   |                    |    |
|---------|----|------|-----|---|--------------------|----|
| MV_Schw | T  | 9575 | 10  | 0 |                    | 1  |
| MV_Schw | T  | 9576 | 21  | 0 |                    | 1  |
| MV_Schw | C  | 9577 | 79  | 2 |                    | 1  |
| MV_Schw | G  | 9578 | 39  | 0 |                    | 1  |
| MV_Schw | C  | 9579 | 300 | 1 | 0.0273324763659365 |    |
| MV_Schw | T  | 9580 | 35  | 0 |                    | 1  |
| MV_Schw | G  | 9581 | 39  | 0 |                    | 1  |
| MV_Schw | NA | 9582 | 0   | 0 |                    | NA |
| MV_Schw | A  | 9583 | 6   | 0 |                    | 1  |
| MV_Schw | C  | 9584 | 35  | 1 |                    | 1  |
| MV_Schw | T  | 9585 | 47  | 1 |                    | 1  |
| MV_Schw | C  | 9586 | 47  | 0 |                    | 1  |
| MV_Schw | C  | 9587 | 97  | 0 | 0.503192867159235  |    |
| MV_Schw | A  | 9588 | 16  | 0 |                    | 1  |
| MV_Schw | A  | 9589 | 4   | 0 |                    | 1  |
| MV_Schw | NA | 9590 | 0   | 0 |                    | NA |
| MV_Schw | G  | 9591 | 107 | 0 | 0.380027812845055  |    |
| MV_Schw | T  | 9592 | 4   | 0 |                    | 1  |
| MV_Schw | C  | 9593 | 56  | 1 |                    | 1  |
| MV_Schw | A  | 9594 | 19  | 0 |                    | 1  |
| MV_Schw | G  | 9595 | 72  | 1 |                    | 1  |
| MV_Schw | T  | 9596 | 2   | 0 |                    | 1  |
| MV_Schw | G  | 9597 | 16  | 0 |                    | 1  |
| MV_Schw | A  | 9598 | 12  | 0 |                    | 1  |
| MV_Schw | T  | 9599 | 17  | 0 |                    | 1  |
| MV_Schw | A  | 9600 | 4   | 0 |                    | 1  |
| MV_Schw | A  | 9601 | 31  | 0 |                    | 1  |
| MV_Schw | G  | 9602 | 23  | 0 |                    | 1  |
| MV_Schw | G  | 9603 | 236 | 1 | 0.0898677847554452 |    |
| MV_Schw | T  | 9604 | 8   | 0 |                    | 1  |
| MV_Schw | T  | 9605 | 10  | 0 |                    | 1  |
| MV_Schw | T  | 9606 | 19  | 0 |                    | 1  |
| MV_Schw | T  | 9607 | 8   | 0 |                    | 1  |
| MV_Schw | C  | 9608 | 64  | 0 | 0.789229943133706  |    |
| MV_Schw | C  | 9609 | 194 | 1 | 0.288870964410068  |    |
| MV_Schw | A  | 9610 | 17  | 0 |                    | 1  |

|         |   |      |     |   |                   |   |
|---------|---|------|-----|---|-------------------|---|
| MV_Schw | A | 9611 | 12  | 0 |                   | 1 |
| MV_Schw | T | 9612 | 16  | 0 |                   | 1 |
| MV_Schw | G | 9613 | 37  | 0 |                   | 1 |
| MV_Schw | C | 9614 | 27  | 0 |                   | 1 |
| MV_Schw | T | 9615 | 8   | 0 |                   | 1 |
| MV_Schw | T | 9616 | 29  | 0 |                   | 1 |
| MV_Schw | A | 9617 | 31  | 0 |                   | 1 |
| MV_Schw | A | 9618 | 21  | 1 |                   | 1 |
| MV_Schw | G | 9619 | 254 | 1 | 0.236329415529751 |   |
| MV_Schw | G | 9620 | 41  | 0 |                   | 1 |
| MV_Schw | G | 9621 | 16  | 1 | 0.950262622850522 |   |
| MV_Schw | A | 9622 | 6   | 0 |                   | 1 |
| MV_Schw | C | 9623 | 161 | 1 | 0.78470776546672  |   |
| MV_Schw | A | 9624 | 33  | 1 |                   | 1 |
| MV_Schw | C | 9625 | 236 | 3 | 0.88950624150852  |   |
| MV_Schw | T | 9626 | 60  | 1 |                   | 1 |
| MV_Schw | A | 9627 | 14  | 0 |                   | 1 |
| MV_Schw | A | 9628 | 8   | 0 |                   | 1 |
| MV_Schw | C | 9629 | 413 | 5 | 0.571599593585026 |   |
| MV_Schw | T | 9630 | 27  | 0 |                   | 1 |
| MV_Schw | C | 9631 | 413 | 3 | 0.189817598380461 |   |
| MV_Schw | A | 9632 | 12  | 0 |                   | 1 |
| MV_Schw | C | 9633 | 68  | 0 | 0.789229943133706 |   |
| MV_Schw | G | 9634 | 39  | 1 |                   | 1 |
| MV_Schw | G | 9635 | 89  | 0 | 0.497615650989996 |   |
| MV_Schw | C | 9636 | 122 | 1 | 0.791667533131283 |   |
| MV_Schw | T | 9637 | 16  | 0 |                   | 1 |
| MV_Schw | T | 9638 | 10  | 0 |                   | 1 |
| MV_Schw | G | 9639 | 203 | 1 | 0.218380248770346 |   |
| MV_Schw | G | 9640 | 41  | 0 |                   | 1 |
| MV_Schw | C | 9641 | 62  | 1 |                   | 1 |
| MV_Schw | C | 9642 | 72  | 1 |                   | 1 |
| MV_Schw | T | 9643 | 10  | 0 |                   | 1 |
| MV_Schw | A | 9644 | 6   | 1 | 0.198154988453258 |   |
| MV_Schw | G | 9645 | 83  | 3 | 0.897349285586955 |   |
| MV_Schw | G | 9646 | 29  | 1 |                   | 1 |

|         |   |      |     |   |                   |   |
|---------|---|------|-----|---|-------------------|---|
| MV_Schw | C | 9647 | 48  | 1 |                   | 1 |
| MV_Schw | T | 9648 | 112 | 1 | 0.789229943133706 |   |
| MV_Schw | C | 9649 | 81  | 1 |                   | 1 |
| MV_Schw | C | 9650 | 35  | 1 |                   | 1 |
| MV_Schw | G | 9651 | 50  | 1 |                   | 1 |
| MV_Schw | A | 9652 | 45  | 0 |                   | 1 |
| MV_Schw | A | 9653 | 27  | 1 |                   | 1 |
| MV_Schw | T | 9654 | 8   | 1 | 0.789229943133706 |   |
| MV_Schw | T | 9655 | 16  | 0 |                   | 1 |
| MV_Schw | G | 9656 | 21  | 1 |                   | 1 |
| MV_Schw | A | 9657 | 21  | 1 |                   | 1 |
| MV_Schw | G | 9658 | 355 | 7 |                   | 1 |
| MV_Schw | G | 9659 | 50  | 2 | 0.746970975838775 |   |
| MV_Schw | G | 9660 | 47  | 1 |                   | 1 |
| MV_Schw | A | 9661 | 97  | 1 |                   | 1 |
| MV_Schw | G | 9662 | 78  | 1 |                   | 1 |
| MV_Schw | G | 9663 | 105 | 1 |                   | 1 |
| MV_Schw | A | 9664 | 29  | 0 |                   | 1 |
| MV_Schw | C | 9665 | 91  | 1 |                   | 1 |
| MV_Schw | A | 9666 | 41  | 0 |                   | 1 |
| MV_Schw | T | 9667 | 12  | 0 |                   | 1 |
| MV_Schw | C | 9668 | 155 | 1 | 0.436311974989592 |   |
| MV_Schw | A | 9669 | 41  | 1 | 0.945767847051808 |   |
| MV_Schw | A | 9670 | 83  | 0 | 0.645428736569362 |   |
| MV_Schw | G | 9671 | 260 | 5 |                   | 1 |
| MV_Schw | G | 9672 | 591 | 7 | 0.346363438943306 |   |
| MV_Schw | A | 9673 | 8   | 1 | 0.789229943133706 |   |
| MV_Schw | G | 9674 | 269 | 5 |                   | 1 |
| MV_Schw | A | 9675 | 58  | 1 |                   | 1 |
| MV_Schw | A | 9676 | 48  | 1 |                   | 1 |
| MV_Schw | A | 9677 | 14  | 1 | 0.944879389258477 |   |
| MV_Schw | G | 9678 | 101 | 3 |                   | 1 |
| MV_Schw | T | 9679 | 23  | 0 |                   | 1 |
| MV_Schw | T | 9680 | 45  | 1 |                   | 1 |
| MV_Schw | A | 9681 | 132 | 1 | 0.659520109379356 |   |
| MV_Schw | T | 9682 | 39  | 1 |                   | 1 |

|         |   |      |     |   |                   |
|---------|---|------|-----|---|-------------------|
| MV_Schw | T | 9683 | 54  | 0 | 0.950262622850522 |
| MV_Schw | A | 9684 | 17  | 1 | 0.983041048229953 |
| MV_Schw | A | 9685 | 4   | 0 | 1                 |
| MV_Schw | C | 9686 | 188 | 3 | 1                 |
| MV_Schw | T | 9687 | 109 | 1 | 1                 |
| MV_Schw | T | 9688 | 107 | 2 | 1                 |
| MV_Schw | G | 9689 | 91  | 0 | 0.497615650989996 |
| MV_Schw | G | 9690 | 87  | 0 | 0.653463094391213 |
| MV_Schw | G | 9691 | 74  | 1 | 1                 |
| MV_Schw | A | 9692 | 39  | 0 | 1                 |
| MV_Schw | G | 9693 | 153 | 3 | 1                 |
| MV_Schw | T | 9694 | 25  | 0 | 1                 |
| MV_Schw | T | 9695 | 6   | 0 | 1                 |
| MV_Schw | T | 9696 | 35  | 1 | 1                 |
| MV_Schw | A | 9697 | 31  | 0 | 1                 |
| MV_Schw | C | 9698 | 128 | 1 | 1                 |
| MV_Schw | A | 9699 | 23  | 1 | 1                 |
| MV_Schw | T | 9700 | 85  | 0 | 0.648224297390367 |
| MV_Schw | G | 9701 | 31  | 1 | 0.791667533131283 |
| MV_Schw | C | 9702 | 136 | 2 | 1                 |
| MV_Schw | A | 9703 | 25  | 0 | 1                 |
| MV_Schw | C | 9704 | 66  | 0 | 0.789229943133706 |
| MV_Schw | A | 9705 | 43  | 1 | 0.950262622850522 |
| MV_Schw | G | 9706 | 17  | 0 | 1                 |
| MV_Schw | C | 9707 | 45  | 1 | 1                 |
| MV_Schw | T | 9708 | 8   | 0 | 1                 |
| MV_Schw | C | 9709 | 54  | 0 | 0.950262622850522 |
| MV_Schw | C | 9710 | 19  | 0 | 1                 |
| MV_Schw | C | 9711 | 155 | 1 | 0.88950624150852  |
| MV_Schw | A | 9712 | 76  | 0 | 0.638894311640422 |
| MV_Schw | G | 9713 | 227 | 1 | 0.362346869888542 |
| MV_Schw | T | 9714 | 14  | 0 | 1                 |
| MV_Schw | G | 9715 | 31  | 0 | 1                 |
| MV_Schw | G | 9716 | 211 | 0 | 0.03148485115913  |
| MV_Schw | T | 9717 | 19  | 1 | 1                 |
| MV_Schw | T | 9718 | 45  | 0 | 1                 |

|         |    |      |     |   |                   |    |
|---------|----|------|-----|---|-------------------|----|
| MV_Schw | T  | 9719 | 64  | 1 |                   | 1  |
| MV_Schw | G  | 9720 | 99  | 3 |                   | 1  |
| MV_Schw | A  | 9721 | 47  | 0 |                   | 1  |
| MV_Schw | G  | 9722 | 246 | 2 | 0.528591092326266 |    |
| MV_Schw | C  | 9723 | 196 | 7 | 0.57780206681461  |    |
| MV_Schw | C  | 9724 | 21  | 0 |                   | 1  |
| MV_Schw | C  | 9725 | 23  | 1 |                   | 1  |
| MV_Schw | T  | 9726 | 31  | 0 |                   | 1  |
| MV_Schw | T  | 9727 | 33  | 0 |                   | 1  |
| MV_Schw | T  | 9728 | 47  | 0 |                   | 1  |
| MV_Schw | C  | 9729 | 39  | 0 |                   | 1  |
| MV_Schw | NA | 9730 | 0   | 0 |                   | NA |
| MV_Schw | G  | 9731 | 172 | 1 | 0.342651296301386 |    |
| MV_Schw | T  | 9732 | 43  | 0 |                   | 1  |
| MV_Schw | T  | 9733 | 35  | 0 |                   | 1  |
| MV_Schw | T  | 9734 | 35  | 0 |                   | 1  |
| MV_Schw | T  | 9735 | 17  | 0 |                   | 1  |
| MV_Schw | G  | 9736 | 29  | 1 |                   | 1  |
| MV_Schw | G  | 9737 | 107 | 1 | 0.945767847051808 |    |
| MV_Schw | T  | 9738 | 33  | 1 |                   | 1  |
| MV_Schw | T  | 9739 | 16  | 0 |                   | 1  |
| MV_Schw | T  | 9740 | 0   | 0 |                   | 1  |
| MV_Schw | A  | 9741 | 0   | 1 | 0.307480793677112 |    |
| MV_Schw | C  | 9742 | 23  | 1 |                   | 1  |
| MV_Schw | A  | 9743 | 27  | 0 |                   | 1  |
| MV_Schw | G  | 9744 | 109 | 0 | 0.381672248067152 |    |
| MV_Schw | T  | 9745 | 52  | 0 | 0.950262622850522 |    |
| MV_Schw | C  | 9746 | 47  | 0 |                   | 1  |
| MV_Schw | A  | 9747 | 29  | 0 |                   | 1  |
| MV_Schw | A  | 9748 | 10  | 0 |                   | 1  |
| MV_Schw | G  | 9749 | 151 | 1 | 0.88950624150852  |    |
| MV_Schw | A  | 9750 | 29  | 0 |                   | 1  |
| MV_Schw | C  | 9751 | 231 | 2 | 0.63332687953074  |    |
| MV_Schw | T  | 9752 | 6   | 0 |                   | 1  |
| MV_Schw | G  | 9753 | 12  | 1 | 0.88950624150852  |    |
| MV_Schw | A  | 9754 | 47  | 0 |                   | 1  |



|         |   |      |     |   |                    |   |
|---------|---|------|-----|---|--------------------|---|
| MV_Schw | G | 9755 | 110 | 0 | 0.385864542883514  |   |
| MV_Schw | A | 9756 | 64  | 1 |                    | 1 |
| MV_Schw | T | 9757 | 54  | 1 |                    | 1 |
| MV_Schw | G | 9758 | 19  | 0 |                    | 1 |
| MV_Schw | A | 9759 | 16  | 0 |                    | 1 |
| MV_Schw | G | 9760 | 186 | 1 | 0.278307737263878  |   |
| MV_Schw | G | 9761 | 248 | 0 | 0.0109464716562247 |   |
| MV_Schw | T | 9762 | 23  | 0 |                    | 1 |
| MV_Schw | C | 9763 | 118 | 0 | 0.296802961873227  |   |
| MV_Schw | A | 9764 | 25  | 0 |                    | 1 |
| MV_Schw | G | 9765 | 122 | 1 | 0.791667533131283  |   |
| MV_Schw | T | 9766 | 41  | 0 |                    | 1 |
| MV_Schw | G | 9767 | 138 | 2 |                    | 1 |
| MV_Schw | A | 9768 | 45  | 0 |                    | 1 |
| MV_Schw | T | 9769 | 45  | 0 |                    | 1 |
| MV_Schw | T | 9770 | 14  | 1 | 0.426789350155389  |   |
| MV_Schw | A | 9771 | 83  | 1 |                    | 1 |
| MV_Schw | A | 9772 | 12  | 0 |                    | 1 |
| MV_Schw | A | 9773 | 48  | 0 | 0.950262622850522  |   |
| MV_Schw | T | 9774 | 87  | 1 |                    | 1 |
| MV_Schw | C | 9775 | 345 | 1 | 0.0340037371952465 |   |
| MV_Schw | A | 9776 | 8   | 0 |                    | 1 |
| MV_Schw | C | 9777 | 110 | 2 |                    | 1 |
| MV_Schw | A | 9778 | 14  | 0 |                    | 1 |
| MV_Schw | A | 9779 | 27  | 1 |                    | 1 |
| MV_Schw | A | 9780 | 4   | 0 |                    | 1 |
| MV_Schw | C | 9781 | 176 | 0 | 0.0873173091778286 |   |
| MV_Schw | C | 9782 | 8   | 1 | 0.258627633593378  |   |
| MV_Schw | C | 9783 | 19  | 0 |                    | 1 |
| MV_Schw | A | 9784 | 14  | 1 | 0.944879389258477  |   |
| MV_Schw | T | 9785 | 21  | 1 |                    | 1 |
| MV_Schw | A | 9786 | 21  | 0 |                    | 1 |
| MV_Schw | C | 9787 | 58  | 0 | 0.953489044526869  |   |
| MV_Schw | T | 9788 | 41  | 0 |                    | 1 |
| MV_Schw | T | 9789 | 37  | 0 |                    | 1 |
| MV_Schw | G | 9790 | 143 | 3 |                    | 1 |

|         |   |      |     |   |                   |   |
|---------|---|------|-----|---|-------------------|---|
| MV_Schw | C | 9791 | 109 | 1 |                   | 1 |
| MV_Schw | C | 9792 | 174 | 2 |                   | 1 |
| MV_Schw | A | 9793 | 54  | 1 |                   | 1 |
| MV_Schw | T | 9794 | 21  | 0 |                   | 1 |
| MV_Schw | A | 9795 | 27  | 0 |                   | 1 |
| MV_Schw | G | 9796 | 70  | 1 |                   | 1 |
| MV_Schw | G | 9797 | 136 | 1 | 0.983041048229953 |   |
| MV_Schw | A | 9798 | 62  | 1 |                   | 1 |
| MV_Schw | G | 9799 | 124 | 1 | 0.791667533131283 |   |
| MV_Schw | G | 9800 | 209 | 1 | 0.161035028661221 |   |
| MV_Schw | A | 9801 | 29  | 1 |                   | 1 |
| MV_Schw | G | 9802 | 157 | 1 | 0.436962346550212 |   |
| MV_Schw | A | 9803 | 14  | 0 |                   | 1 |
| MV_Schw | C | 9804 | 417 | 3 | 0.072815586219973 |   |
| MV_Schw | A | 9805 | 6   | 0 |                   | 1 |
| MV_Schw | C | 9806 | 161 | 1 | 0.440157375549872 |   |
| MV_Schw | A | 9807 | 174 | 3 |                   | 1 |
| MV_Schw | C | 9808 | 68  | 0 | 0.789229943133706 |   |
| MV_Schw | A | 9809 | 70  | 1 |                   | 1 |
| MV_Schw | C | 9810 | 45  | 0 |                   | 1 |
| MV_Schw | C | 9811 | 78  | 0 | 0.638894311640422 |   |
| MV_Schw | T | 9812 | 14  | 0 |                   | 1 |
| MV_Schw | G | 9813 | 157 | 1 | 0.88950624150852  |   |
| MV_Schw | T | 9814 | 10  | 0 |                   | 1 |
| MV_Schw | A | 9815 | 39  | 0 |                   | 1 |
| MV_Schw | T | 9816 | 37  | 0 |                   | 1 |
| MV_Schw | T | 9817 | 10  | 0 |                   | 1 |
| MV_Schw | C | 9818 | 66  | 1 |                   | 1 |
| MV_Schw | T | 9819 | 35  | 0 |                   | 1 |
| MV_Schw | T | 9820 | 16  | 1 | 0.950262622850522 |   |
| MV_Schw | C | 9821 | 221 | 1 | 0.356200658338914 |   |
| MV_Schw | A | 9822 | 16  | 0 |                   | 1 |
| MV_Schw | C | 9823 | 54  | 0 | 0.950262622850522 |   |
| MV_Schw | T | 9824 | 35  | 0 |                   | 1 |
| MV_Schw | G | 9825 | 12  | 0 |                   | 1 |
| MV_Schw | G | 9826 | 33  | 0 |                   | 1 |

|         |    |      |     |   |                   |
|---------|----|------|-----|---|-------------------|
| MV_Schw | NA | 9827 | 0   | 0 | NA                |
| MV_Schw | A  | 9828 | 10  | 0 | 1                 |
| MV_Schw | G  | 9829 | 120 | 2 | 1                 |
| MV_Schw | NA | 9830 | 0   | 0 | NA                |
| MV_Schw | T  | 9831 | 4   | 0 | 1                 |
| MV_Schw | C  | 9832 | 19  | 0 | 1                 |
| MV_Schw | A  | 9833 | 27  | 0 | 1                 |
| MV_Schw | G  | 9834 | 74  | 1 | 1                 |
| MV_Schw | T  | 9835 | 14  | 0 | 1                 |
| MV_Schw | T  | 9836 | 47  | 0 | 1                 |
| MV_Schw | G  | 9837 | 8   | 0 | 1                 |
| MV_Schw | NA | 9838 | 0   | 0 | NA                |
| MV_Schw | G  | 9839 | 252 | 1 | 0.235179608025014 |
| MV_Schw | T  | 9840 | 74  | 0 | 0.795198078226602 |
| MV_Schw | T  | 9841 | 50  | 1 | 1                 |
| MV_Schw | G  | 9842 | 48  | 0 | 0.950262622850522 |
| MV_Schw | C  | 9843 | 138 | 1 | 0.673422966374487 |
| MV_Schw | T  | 9844 | 155 | 0 | 0.118807954027477 |
| MV_Schw | A  | 9845 | 250 | 1 | 0.234360961542297 |
| MV_Schw | A  | 9846 | 25  | 0 | 1                 |
| MV_Schw | T  | 9847 | 52  | 0 | 0.950262622850522 |
| MV_Schw | C  | 9848 | 85  | 1 | 1                 |
| MV_Schw | T  | 9849 | 21  | 0 | 1                 |
| MV_Schw | C  | 9850 | 198 | 2 | 0.822598489333375 |
| MV_Schw | T  | 9851 | 37  | 0 | 1                 |
| MV_Schw | C  | 9852 | 140 | 1 | 0.986363032184908 |
| MV_Schw | G  | 9853 | 171 | 1 | 0.789229943133706 |
| MV_Schw | T  | 9854 | 37  | 1 | 1                 |
| MV_Schw | G  | 9855 | 21  | 0 | 1                 |
| MV_Schw | A  | 9856 | 8   | 0 | 1                 |
| MV_Schw | C  | 9857 | 89  | 1 | 1                 |
| MV_Schw | C  | 9858 | 48  | 0 | 0.950262622850522 |
| MV_Schw | NA | 9859 | 0   | 0 | NA                |
| MV_Schw | T  | 9860 | 19  | 0 | 1                 |
| MV_Schw | G  | 9861 | 47  | 0 | 1                 |
| MV_Schw | T  | 9862 | 14  | 0 | 1                 |

|         |   |      |     |   |                    |
|---------|---|------|-----|---|--------------------|
| MV_Schw | T | 9863 | 60  | 0 | 0.957721317456694  |
| MV_Schw | G | 9864 | 202 | 2 | 0.822598489333375  |
| MV_Schw | C | 9865 | 50  | 0 | 0.950262622850522  |
| MV_Schw | T | 9866 | 14  | 0 | 1                  |
| MV_Schw | A | 9867 | 85  | 2 | 1                  |
| MV_Schw | T | 9868 | 27  | 0 | 1                  |
| MV_Schw | A | 9869 | 19  | 1 | 0.57780206681461   |
| MV_Schw | A | 9870 | 17  | 0 | 1                  |
| MV_Schw | T | 9871 | 14  | 0 | 1                  |
| MV_Schw | C | 9872 | 39  | 0 | 1                  |
| MV_Schw | A | 9873 | 23  | 1 | 1                  |
| MV_Schw | G | 9874 | 118 | 1 | 1                  |
| MV_Schw | T | 9875 | 58  | 1 | 1                  |
| MV_Schw | A | 9876 | 47  | 1 | 1                  |
| MV_Schw | A | 9877 | 35  | 0 | 1                  |
| MV_Schw | A | 9878 | 47  | 0 | 1                  |
| MV_Schw | G | 9879 | 103 | 0 | 0.37877131423274   |
| MV_Schw | A | 9880 | 12  | 0 | 1                  |
| MV_Schw | G | 9881 | 74  | 2 | 1                  |
| MV_Schw | T | 9882 | 33  | 1 | 0.822598489333375  |
| MV_Schw | C | 9883 | 128 | 1 | 0.658415249679101  |
| MV_Schw | T | 9884 | 89  | 1 | 1                  |
| MV_Schw | C | 9885 | 91  | 1 | 1                  |
| MV_Schw | A | 9886 | 76  | 0 | 0.638894311640422  |
| MV_Schw | A | 9887 | 52  | 0 | 0.950262622850522  |
| MV_Schw | C | 9888 | 260 | 1 | 0.0687788015376242 |
| MV_Schw | A | 9889 | 50  | 0 | 0.950262622850522  |
| MV_Schw | T | 9890 | 31  | 0 | 1                  |
| MV_Schw | G | 9891 | 31  | 0 | 1                  |
| MV_Schw | T | 9892 | 8   | 0 | 1                  |
| MV_Schw | A | 9893 | 128 | 1 | 0.658415249679101  |
| MV_Schw | T | 9894 | 37  | 0 | 1                  |
| MV_Schw | A | 9895 | 41  | 1 | 1                  |
| MV_Schw | T | 9896 | 2   | 0 | 1                  |
| MV_Schw | T | 9897 | 23  | 0 | 1                  |
| MV_Schw | A | 9898 | 10  | 0 | 1                  |

|         |   |      |     |   |                    |   |
|---------|---|------|-----|---|--------------------|---|
| MV_Schw | C | 9899 | 130 | 3 |                    | 1 |
| MV_Schw | C | 9900 | 155 | 0 | 0.118807954027477  |   |
| MV_Schw | T | 9901 | 176 | 0 | 0.0873173091778286 |   |
| MV_Schw | G | 9902 | 27  | 0 |                    | 1 |
| MV_Schw | A | 9903 | 0   | 1 | 0.307480793677112  |   |
| MV_Schw | C | 9904 | 60  | 1 |                    | 1 |
| MV_Schw | A | 9905 | 60  | 0 | 0.957721317456694  |   |
| MV_Schw | T | 9906 | 79  | 0 | 0.639207655977387  |   |
| MV_Schw | T | 9907 | 4   | 0 |                    | 1 |
| MV_Schw | T | 9908 | 6   | 0 |                    | 1 |
| MV_Schw | G | 9909 | 45  | 0 |                    | 1 |
| MV_Schw | A | 9910 | 8   | 0 |                    | 1 |
| MV_Schw | A | 9911 | 66  | 0 | 0.789229943133706  |   |
| MV_Schw | C | 9912 | 190 | 1 | 0.542247232322076  |   |
| MV_Schw | T | 9913 | 12  | 0 |                    | 1 |
| MV_Schw | G | 9914 | 4   | 0 |                    | 1 |
| MV_Schw | G | 9915 | 99  | 1 | 0.944879389258477  |   |
| MV_Schw | T | 9916 | 50  | 1 |                    | 1 |
| MV_Schw | T | 9917 | 10  | 0 |                    | 1 |
| MV_Schw | T | 9918 | 27  | 0 |                    | 1 |
| MV_Schw | T | 9919 | 8   | 0 |                    | 1 |
| MV_Schw | G | 9920 | 21  | 0 |                    | 1 |
| MV_Schw | A | 9921 | 4   | 0 |                    | 1 |
| MV_Schw | T | 9922 | 27  | 0 |                    | 1 |
| MV_Schw | G | 9923 | 17  | 0 |                    | 1 |
| MV_Schw | T | 9924 | 2   | 0 |                    | 1 |
| MV_Schw | A | 9925 | 17  | 0 |                    | 1 |
| MV_Schw | T | 9926 | 47  | 0 |                    | 1 |
| MV_Schw | T | 9927 | 31  | 0 |                    | 1 |
| MV_Schw | G | 9928 | 85  | 1 |                    | 1 |
| MV_Schw | T | 9929 | 43  | 0 |                    | 1 |
| MV_Schw | G | 9930 | 29  | 0 |                    | 1 |
| MV_Schw | A | 9931 | 31  | 0 |                    | 1 |
| MV_Schw | T | 9932 | 19  | 0 |                    | 1 |
| MV_Schw | G | 9933 | 66  | 1 |                    | 1 |
| MV_Schw | T | 9934 | 2   | 0 |                    | 1 |

|         |   |      |     |   |                   |   |
|---------|---|------|-----|---|-------------------|---|
| MV_Schw | C | 9935 | 25  | 0 |                   | 1 |
| MV_Schw | A | 9936 | 76  | 0 | 0.638894311640422 |   |
| MV_Schw | T | 9937 | 52  | 1 |                   | 1 |
| MV_Schw | A | 9938 | 27  | 1 |                   | 1 |
| MV_Schw | G | 9939 | 54  | 1 |                   | 1 |
| MV_Schw | A | 9940 | 23  | 0 |                   | 1 |
| MV_Schw | G | 9941 | 231 | 5 |                   | 1 |
| MV_Schw | G | 9942 | 109 | 1 |                   | 1 |
| MV_Schw | G | 9943 | 78  | 1 |                   | 1 |
| MV_Schw | G | 9944 | 58  | 1 |                   | 1 |
| MV_Schw | A | 9945 | 2   | 0 |                   | 1 |
| MV_Schw | G | 9946 | 136 | 1 | 0.667619064364632 |   |
| MV_Schw | G | 9947 | 134 | 2 |                   | 1 |
| MV_Schw | T | 9948 | 12  | 0 |                   | 1 |
| MV_Schw | T | 9949 | 62  | 0 | 0.789229943133706 |   |
| MV_Schw | A | 9950 | 35  | 1 |                   | 1 |
| MV_Schw | A | 9951 | 58  | 0 | 0.953489044526869 |   |
| MV_Schw | T | 9952 | 105 | 0 | 0.37877131423274  |   |
| MV_Schw | G | 9953 | 333 | 2 | 0.151437812318609 |   |
| MV_Schw | A | 9954 | 17  | 1 | 0.983041048229953 |   |
| MV_Schw | C | 9955 | 262 | 3 | 0.682748760038921 |   |
| MV_Schw | A | 9956 | 37  | 0 |                   | 1 |
| MV_Schw | G | 9957 | 134 | 1 | 0.66330042087892  |   |
| MV_Schw | A | 9958 | 10  | 0 |                   | 1 |
| MV_Schw | G | 9959 | 203 | 1 | 0.44280652126772  |   |
| MV_Schw | A | 9960 | 47  | 0 |                   | 1 |
| MV_Schw | C | 9961 | 169 | 4 |                   | 1 |
| MV_Schw | C | 9962 | 64  | 1 |                   | 1 |
| MV_Schw | G | 9963 | 62  | 0 | 0.789229943133706 |   |
| MV_Schw | C | 9964 | 85  | 1 |                   | 1 |
| MV_Schw | T | 9965 | 110 | 0 | 0.385864542883514 |   |
| MV_Schw | A | 9966 | 41  | 0 |                   | 1 |
| MV_Schw | T | 9967 | 229 | 1 | 0.365713575863648 |   |
| MV_Schw | G | 9968 | 48  | 1 |                   | 1 |
| MV_Schw | A | 9969 | 0   | 0 |                   | 1 |
| MV_Schw | C | 9970 | 27  | 0 |                   | 1 |

|         |   |       |     |   |                   |   |
|---------|---|-------|-----|---|-------------------|---|
| MV_Schw | T | 9971  | 39  | 0 |                   | 1 |
| MV_Schw | A | 9972  | 60  | 1 |                   | 1 |
| MV_Schw | T | 9973  | 17  | 1 | 0.983041048229953 |   |
| MV_Schw | T | 9974  | 43  | 1 |                   | 1 |
| MV_Schw | G | 9975  | 17  | 0 |                   | 1 |
| MV_Schw | A | 9976  | 10  | 0 |                   | 1 |
| MV_Schw | T | 9977  | 33  | 0 |                   | 1 |
| MV_Schw | G | 9978  | 153 | 1 | 0.88950624150852  |   |
| MV_Schw | C | 9979  | 21  | 0 |                   | 1 |
| MV_Schw | T | 9980  | 27  | 0 |                   | 1 |
| MV_Schw | A | 9981  | 6   | 0 |                   | 1 |
| MV_Schw | G | 9982  | 184 | 1 | 0.277229700444564 |   |
| MV_Schw | G | 9983  | 33  | 1 |                   | 1 |
| MV_Schw | T | 9984  | 6   | 0 |                   | 1 |
| MV_Schw | A | 9985  | 14  | 1 | 0.944879389258477 |   |
| MV_Schw | T | 9986  | 16  | 0 |                   | 1 |
| MV_Schw | A | 9987  | 2   | 0 |                   | 1 |
| MV_Schw | C | 9988  | 198 | 1 | 0.2148607170878   |   |
| MV_Schw | A | 9989  | 116 | 0 | 0.296710762771661 |   |
| MV_Schw | G | 9990  | 47  | 0 |                   | 1 |
| MV_Schw | A | 9991  | 12  | 0 |                   | 1 |
| MV_Schw | G | 9992  | 47  | 1 |                   | 1 |
| MV_Schw | C | 9993  | 161 | 1 | 0.78470776546672  |   |
| MV_Schw | T | 9994  | 16  | 0 |                   | 1 |
| MV_Schw | T | 9995  | 43  | 0 |                   | 1 |
| MV_Schw | C | 9996  | 78  | 2 |                   | 1 |
| MV_Schw | T | 9997  | 66  | 1 |                   | 1 |
| MV_Schw | A | 9998  | 43  | 0 |                   | 1 |
| MV_Schw | G | 9999  | 205 | 1 | 0.220909668665287 |   |
| MV_Schw | G | 10000 | 68  | 1 |                   | 1 |
| MV_Schw | A | 10001 | 12  | 0 |                   | 1 |
| MV_Schw | A | 10002 | 4   | 0 |                   | 1 |
| MV_Schw | G | 10003 | 52  | 0 | 0.950262622850522 |   |
| MV_Schw | A | 10004 | 27  | 0 |                   | 1 |
| MV_Schw | G | 10005 | 254 | 2 | 0.436962346550212 |   |
| MV_Schw | T | 10006 | 4   | 0 |                   | 1 |

|         |   |       |     |   |                   |
|---------|---|-------|-----|---|-------------------|
| MV_Schw | C | 10007 | 81  | 0 | 0.641186461810141 |
| MV_Schw | A | 10008 | 14  | 1 | 0.944879389258477 |
| MV_Schw | G | 10009 | 128 | 0 | 0.307480793677112 |
| MV_Schw | A | 10010 | 99  | 3 | 1                 |
| MV_Schw | T | 10011 | 56  | 1 | 1                 |
| MV_Schw | A | 10012 | 0   | 0 | 1                 |
| MV_Schw | C | 10013 | 14  | 0 | 1                 |
| MV_Schw | A | 10014 | 4   | 1 | 0.619556855087002 |
| MV_Schw | T | 10015 | 35  | 1 | 0.863499923807603 |
| MV_Schw | G | 10016 | 165 | 4 | 1                 |
| MV_Schw | T | 10017 | 54  | 0 | 0.950262622850522 |
| MV_Schw | G | 10018 | 107 | 0 | 0.380027812845055 |
| MV_Schw | G | 10019 | 60  | 0 | 0.957721317456694 |
| MV_Schw | A | 10020 | 89  | 1 | 1                 |
| MV_Schw | A | 10021 | 45  | 1 | 1                 |
| MV_Schw | A | 10022 | 4   | 0 | 1                 |
| MV_Schw | C | 10023 | 89  | 1 | 1                 |
| MV_Schw | T | 10024 | 43  | 0 | 1                 |
| MV_Schw | G | 10025 | 39  | 1 | 1                 |
| MV_Schw | A | 10026 | 58  | 0 | 0.953489044526869 |
| MV_Schw | T | 10027 | 41  | 1 | 1                 |
| MV_Schw | A | 10028 | 10  | 0 | 1                 |
| MV_Schw | G | 10029 | 62  | 1 | 1                 |
| MV_Schw | A | 10030 | 37  | 0 | 1                 |
| MV_Schw | T | 10031 | 27  | 1 | 1                 |
| MV_Schw | G | 10032 | 97  | 0 | 0.503192867159235 |
| MV_Schw | G | 10033 | 124 | 1 | 0.791667533131283 |
| MV_Schw | T | 10034 | 4   | 0 | 1                 |
| MV_Schw | T | 10035 | 17  | 1 | 0.528591092326266 |
| MV_Schw | T | 10036 | 48  | 0 | 0.950262622850522 |
| MV_Schw | C | 10037 | 68  | 2 | 1                 |
| MV_Schw | T | 10038 | 4   | 0 | 1                 |
| MV_Schw | T | 10039 | 29  | 0 | 1                 |
| MV_Schw | C | 10040 | 281 | 4 | 1                 |
| MV_Schw | C | 10041 | 74  | 1 | 1                 |
| MV_Schw | C | 10042 | 107 | 1 | 0.945767847051808 |



|         |   |       |     |   |                   |   |
|---------|---|-------|-----|---|-------------------|---|
| MV_Schw | T | 10043 | 2   | 0 |                   | 1 |
| MV_Schw | G | 10044 | 56  | 1 |                   | 1 |
| MV_Schw | C | 10045 | 27  | 1 | 0.752394317790241 |   |
| MV_Schw | A | 10046 | 16  | 0 |                   | 1 |
| MV_Schw | C | 10047 | 68  | 0 | 0.789229943133706 |   |
| MV_Schw | T | 10048 | 4   | 0 |                   | 1 |
| MV_Schw | C | 10049 | 110 | 1 | 0.789229943133706 |   |
| MV_Schw | G | 10050 | 118 | 2 |                   | 1 |
| MV_Schw | G | 10051 | 79  | 1 |                   | 1 |
| MV_Schw | G | 10052 | 200 | 3 |                   | 1 |
| MV_Schw | A | 10053 | 6   | 0 |                   | 1 |
| MV_Schw | A | 10054 | 21  | 1 |                   | 1 |
| MV_Schw | T | 10055 | 12  | 0 |                   | 1 |
| MV_Schw | C | 10056 | 23  | 0 |                   | 1 |
| MV_Schw | C | 10057 | 64  | 1 |                   | 1 |
| MV_Schw | A | 10058 | 23  | 0 |                   | 1 |
| MV_Schw | A | 10059 | 19  | 0 |                   | 1 |
| MV_Schw | C | 10060 | 250 | 3 | 0.99869736415243  |   |
| MV_Schw | T | 10061 | 6   | 0 |                   | 1 |
| MV_Schw | T | 10062 | 8   | 0 |                   | 1 |
| MV_Schw | A | 10063 | 56  | 0 | 0.950262622850522 |   |
| MV_Schw | T | 10064 | 10  | 0 |                   | 1 |
| MV_Schw | C | 10065 | 155 | 1 | 0.88950624150852  |   |
| MV_Schw | A | 10066 | 23  | 0 |                   | 1 |
| MV_Schw | A | 10067 | 45  | 0 |                   | 1 |
| MV_Schw | A | 10068 | 14  | 0 |                   | 1 |
| MV_Schw | T | 10069 | 50  | 1 |                   | 1 |
| MV_Schw | T | 10070 | 47  | 0 |                   | 1 |
| MV_Schw | G | 10071 | 112 | 1 |                   | 1 |
| MV_Schw | T | 10072 | 21  | 1 |                   | 1 |
| MV_Schw | A | 10073 | 83  | 1 |                   | 1 |
| MV_Schw | G | 10074 | 163 | 1 | 0.442454646177787 |   |
| MV_Schw | C | 10075 | 58  | 0 | 0.953489044526869 |   |
| MV_Schw | C | 10076 | 25  | 1 | 0.704667204683568 |   |
| MV_Schw | A | 10077 | 23  | 0 |                   | 1 |
| MV_Schw | T | 10078 | 31  | 0 |                   | 1 |

|         |   |       |     |   |                    |
|---------|---|-------|-----|---|--------------------|
| MV_Schw | G | 10079 | 345 | 2 | 0.118404761941972  |
| MV_Schw | C | 10080 | 128 | 1 | 0.658415249679101  |
| MV_Schw | T | 10081 | 91  | 1 | 1                  |
| MV_Schw | G | 10082 | 171 | 0 | 0.0850400511116103 |
| MV_Schw | G | 10083 | 147 | 1 | 0.547090293958293  |
| MV_Schw | A | 10084 | 54  | 0 | 0.950262622850522  |
| MV_Schw | G | 10085 | 194 | 1 | 0.288870964410068  |
| MV_Schw | C | 10086 | 17  | 0 | 1                  |
| MV_Schw | C | 10087 | 27  | 0 | 1                  |
| MV_Schw | T | 10088 | 17  | 0 | 1                  |
| MV_Schw | C | 10089 | 97  | 1 | 0.944879389258477  |
| MV_Schw | T | 10090 | 62  | 2 | 0.991517221373143  |
| MV_Schw | T | 10091 | 25  | 0 | 1                  |
| MV_Schw | T | 10092 | 16  | 0 | 1                  |
| MV_Schw | C | 10093 | 120 | 0 | 0.297586725038221  |
| MV_Schw | A | 10094 | 14  | 0 | 1                  |
| MV_Schw | C | 10095 | 103 | 1 | 1                  |
| MV_Schw | T | 10096 | 12  | 0 | 1                  |
| MV_Schw | T | 10097 | 21  | 0 | 1                  |
| MV_Schw | G | 10098 | 16  | 1 | 0.950262622850522  |
| MV_Schw | C | 10099 | 83  | 3 | 0.897349285586955  |
| MV_Schw | T | 10100 | 39  | 0 | 1                  |
| MV_Schw | T | 10101 | 89  | 1 | 1                  |
| MV_Schw | A | 10102 | 12  | 0 | 1                  |
| MV_Schw | C | 10103 | 10  | 0 | 1                  |
| MV_Schw | C | 10104 | 37  | 1 | 1                  |
| MV_Schw | T | 10105 | 54  | 1 | 1                  |
| MV_Schw | G | 10106 | 91  | 1 | 1                  |
| MV_Schw | C | 10107 | 27  | 0 | 1                  |
| MV_Schw | A | 10108 | 58  | 0 | 0.953489044526869  |
| MV_Schw | G | 10109 | 74  | 1 | 1                  |
| MV_Schw | C | 10110 | 23  | 1 | 1                  |
| MV_Schw | T | 10111 | 10  | 0 | 1                  |
| MV_Schw | G | 10112 | 60  | 1 | 1                  |
| MV_Schw | A | 10113 | 16  | 1 | 0.483965165529824  |
| MV_Schw | G | 10114 | 496 | 4 | 0.120448710477086  |

|         |   |       |     |   |                    |   |
|---------|---|-------|-----|---|--------------------|---|
| MV_Schw | G | 10115 | 17  | 0 |                    | 1 |
| MV_Schw | G | 10116 | 31  | 0 |                    | 1 |
| MV_Schw | A | 10117 | 17  | 0 |                    | 1 |
| MV_Schw | T | 10118 | 10  | 1 | 0.822598489333375  |   |
| MV_Schw | A | 10119 | 17  | 0 |                    | 1 |
| MV_Schw | T | 10120 | 74  | 0 | 0.795198078226602  |   |
| MV_Schw | A | 10121 | 16  | 0 |                    | 1 |
| MV_Schw | A | 10122 | 2   | 0 |                    | 1 |
| MV_Schw | C | 10123 | 41  | 0 |                    | 1 |
| MV_Schw | A | 10124 | 14  | 0 |                    | 1 |
| MV_Schw | G | 10125 | 213 | 2 | 0.73548636006501   |   |
| MV_Schw | T | 10126 | 25  | 0 |                    | 1 |
| MV_Schw | A | 10127 | 29  | 0 |                    | 1 |
| MV_Schw | G | 10128 | 41  | 0 |                    | 1 |
| MV_Schw | A | 10129 | 4   | 0 |                    | 1 |
| MV_Schw | A | 10130 | 16  | 0 |                    | 1 |
| MV_Schw | C | 10131 | 186 | 0 | 0.0611551441006359 |   |
| MV_Schw | T | 10132 | 12  | 0 |                    | 1 |
| MV_Schw | C | 10133 | 70  | 0 | 0.789229943133706  |   |
| MV_Schw | A | 10134 | 8   | 0 |                    | 1 |
| MV_Schw | G | 10135 | 316 | 1 | 0.0202604711578266 |   |
| MV_Schw | A | 10136 | 39  | 1 |                    | 1 |
| MV_Schw | G | 10137 | 64  | 0 | 0.789229943133706  |   |
| MV_Schw | G | 10138 | 33  | 1 |                    | 1 |
| MV_Schw | T | 10139 | 2   | 1 | 0.491835918445353  |   |
| MV_Schw | G | 10140 | 58  | 1 |                    | 1 |
| MV_Schw | C | 10141 | 277 | 1 | 0.0357166733306773 |   |
| MV_Schw | T | 10142 | 68  | 1 |                    | 1 |
| MV_Schw | T | 10143 | 91  | 1 |                    | 1 |
| MV_Schw | T | 10144 | 120 | 1 | 0.789229943133706  |   |
| MV_Schw | C | 10145 | 202 | 1 | 0.216853413677777  |   |
| MV_Schw | C | 10146 | 171 | 1 | 0.789229943133706  |   |
| MV_Schw | T | 10147 | 31  | 0 |                    | 1 |
| MV_Schw | T | 10148 | 79  | 1 |                    | 1 |
| MV_Schw | A | 10149 | 17  | 0 |                    | 1 |
| MV_Schw | A | 10150 | 4   | 0 |                    | 1 |

|         |    |       |     |   |                   |    |
|---------|----|-------|-----|---|-------------------|----|
| MV_Schw | C  | 10151 | 78  | 1 |                   | 1  |
| MV_Schw | C  | 10152 | 48  | 0 | 0.950262622850522 |    |
| MV_Schw | A  | 10153 | 2   | 0 |                   | 1  |
| MV_Schw | C  | 10154 | 29  | 0 |                   | 1  |
| MV_Schw | T  | 10155 | 8   | 0 |                   | 1  |
| MV_Schw | G  | 10156 | 37  | 0 |                   | 1  |
| MV_Schw | C  | 10157 | 64  | 1 |                   | 1  |
| MV_Schw | T  | 10158 | 2   | 0 |                   | 1  |
| MV_Schw | T  | 10159 | 0   | 0 |                   | 1  |
| MV_Schw | T  | 10160 | 21  | 1 |                   | 1  |
| MV_Schw | NA | 10161 | 0   | 0 |                   | NA |
| MV_Schw | C  | 10162 | 87  | 0 | 0.653463094391213 |    |
| MV_Schw | T  | 10163 | 4   | 0 |                   | 1  |
| MV_Schw | G  | 10164 | 62  | 1 |                   | 1  |
| MV_Schw | A  | 10165 | 2   | 0 |                   | 1  |
| MV_Schw | A  | 10166 | 14  | 0 |                   | 1  |
| MV_Schw | A  | 10167 | 58  | 0 | 0.953489044526869 |    |
| MV_Schw | T  | 10168 | 35  | 0 |                   | 1  |
| MV_Schw | A  | 10169 | 6   | 0 |                   | 1  |
| MV_Schw | C  | 10170 | 12  | 0 |                   | 1  |
| MV_Schw | A  | 10171 | 8   | 0 |                   | 1  |
| MV_Schw | T  | 10172 | 19  | 1 |                   | 1  |
| MV_Schw | G  | 10173 | 23  | 1 |                   | 1  |
| MV_Schw | A  | 10174 | 12  | 0 |                   | 1  |
| MV_Schw | T  | 10175 | 19  | 0 |                   | 1  |
| MV_Schw | G  | 10176 | 6   | 1 | 0.704667204683568 |    |
| MV_Schw | T  | 10177 | 27  | 0 |                   | 1  |
| MV_Schw | T  | 10178 | 17  | 0 |                   | 1  |
| MV_Schw | C  | 10179 | 182 | 1 | 0.65158773158174  |    |
| MV_Schw | T  | 10180 | 110 | 1 |                   | 1  |
| MV_Schw | T  | 10181 | 17  | 0 |                   | 1  |
| MV_Schw | G  | 10182 | 147 | 1 | 0.547090293958293 |    |
| MV_Schw | A  | 10183 | 10  | 2 | 0.072815586219973 |    |
| MV_Schw | C  | 10184 | 120 | 1 |                   | 1  |
| MV_Schw | C  | 10185 | 19  | 1 |                   | 1  |
| MV_Schw | A  | 10186 | 8   | 0 |                   | 1  |

|         |   |       |     |   |                   |   |
|---------|---|-------|-----|---|-------------------|---|
| MV_Schw | A | 10187 | 14  | 1 | 0.944879389258477 |   |
| MV_Schw | A | 10188 | 27  | 0 |                   | 1 |
| MV_Schw | A | 10189 | 87  | 1 |                   | 1 |
| MV_Schw | C | 10190 | 256 | 1 | 0.237817203872315 |   |
| MV_Schw | G | 10191 | 16  | 0 |                   | 1 |
| MV_Schw | G | 10192 | 25  | 1 |                   | 1 |
| MV_Schw | G | 10193 | 153 | 3 |                   | 1 |
| MV_Schw | T | 10194 | 6   | 0 |                   | 1 |
| MV_Schw | T | 10195 | 23  | 2 | 0.296710762771661 |   |
| MV_Schw | T | 10196 | 25  | 1 |                   | 1 |
| MV_Schw | T | 10197 | 16  | 0 |                   | 1 |
| MV_Schw | C | 10198 | 89  | 1 |                   | 1 |
| MV_Schw | T | 10199 | 116 | 0 | 0.296710762771661 |   |
| MV_Schw | G | 10200 | 169 | 1 | 0.789229943133706 |   |
| MV_Schw | A | 10201 | 14  | 1 | 0.944879389258477 |   |
| MV_Schw | T | 10202 | 79  | 1 |                   | 1 |
| MV_Schw | G | 10203 | 74  | 0 | 0.795198078226602 |   |
| MV_Schw | A | 10204 | 23  | 0 |                   | 1 |
| MV_Schw | A | 10205 | 6   | 0 |                   | 1 |
| MV_Schw | G | 10206 | 140 | 1 | 0.542247232322076 |   |
| MV_Schw | G | 10207 | 70  | 0 | 0.789229943133706 |   |
| MV_Schw | T | 10208 | 6   | 0 |                   | 1 |
| MV_Schw | A | 10209 | 10  | 0 |                   | 1 |
| MV_Schw | C | 10210 | 143 | 1 | 0.88950624150852  |   |
| MV_Schw | T | 10211 | 37  | 0 |                   | 1 |
| MV_Schw | T | 10212 | 8   | 0 |                   | 1 |
| MV_Schw | A | 10213 | 62  | 1 |                   | 1 |
| MV_Schw | T | 10214 | 25  | 0 |                   | 1 |
| MV_Schw | C | 10215 | 101 | 1 | 0.944879389258477 |   |
| MV_Schw | A | 10216 | 58  | 0 | 0.953489044526869 |   |
| MV_Schw | T | 10217 | 39  | 0 |                   | 1 |
| MV_Schw | G | 10218 | 16  | 0 |                   | 1 |
| MV_Schw | A | 10219 | 19  | 0 |                   | 1 |
| MV_Schw | G | 10220 | 169 | 1 | 0.789229943133706 |   |
| MV_Schw | T | 10221 | 2   | 0 |                   | 1 |
| MV_Schw | T | 10222 | 10  | 0 |                   | 1 |

|         |    |       |     |   |                   |    |
|---------|----|-------|-----|---|-------------------|----|
| MV_Schw | A  | 10223 | 17  | 0 |                   | 1  |
| MV_Schw | A  | 10224 | 10  | 0 |                   | 1  |
| MV_Schw | C  | 10225 | 161 | 0 | 0.119516505590852 |    |
| MV_Schw | T  | 10226 | 101 | 1 | 0.944879389258477 |    |
| MV_Schw | G  | 10227 | 27  | 1 |                   | 1  |
| MV_Schw | A  | 10228 | 4   | 0 |                   | 1  |
| MV_Schw | A  | 10229 | 2   | 0 |                   | 1  |
| MV_Schw | G  | 10230 | 31  | 0 |                   | 1  |
| MV_Schw | C  | 10231 | 47  | 0 |                   | 1  |
| MV_Schw | T  | 10232 | 37  | 0 |                   | 1  |
| MV_Schw | C  | 10233 | 149 | 1 | 0.88950624150852  |    |
| MV_Schw | T  | 10234 | 6   | 0 |                   | 1  |
| MV_Schw | A  | 10235 | 41  | 0 |                   | 1  |
| MV_Schw | G  | 10236 | 27  | 0 |                   | 1  |
| MV_Schw | A  | 10237 | 21  | 0 |                   | 1  |
| MV_Schw | T  | 10238 | 12  | 0 |                   | 1  |
| MV_Schw | T  | 10239 | 8   | 0 |                   | 1  |
| MV_Schw | A  | 10240 | 4   | 0 |                   | 1  |
| MV_Schw | C  | 10241 | 85  | 1 |                   | 1  |
| MV_Schw | A  | 10242 | 29  | 0 |                   | 1  |
| MV_Schw | T  | 10243 | 19  | 1 | 0.57780206681461  |    |
| MV_Schw | T  | 10244 | 19  | 0 |                   | 1  |
| MV_Schw | T  | 10245 | 17  | 1 | 0.983041048229953 |    |
| MV_Schw | T  | 10246 | 21  | 0 |                   | 1  |
| MV_Schw | C  | 10247 | 39  | 0 |                   | 1  |
| MV_Schw | A  | 10248 | 91  | 1 |                   | 1  |
| MV_Schw | T  | 10249 | 16  | 0 |                   | 1  |
| MV_Schw | A  | 10250 | 6   | 0 |                   | 1  |
| MV_Schw | NA | 10251 | 0   | 0 |                   | NA |
| MV_Schw | C  | 10252 | 31  | 0 |                   | 1  |
| MV_Schw | T  | 10253 | 62  | 0 | 0.789229943133706 |    |
| MV_Schw | G  | 10254 | 58  | 0 | 0.953489044526869 |    |
| MV_Schw | A  | 10255 | 25  | 0 |                   | 1  |
| MV_Schw | T  | 10256 | 19  | 1 |                   | 1  |
| MV_Schw | G  | 10257 | 12  | 0 |                   | 1  |
| MV_Schw | A  | 10258 | 8   | 0 |                   | 1  |

|         |    |       |     |   |                   |    |
|---------|----|-------|-----|---|-------------------|----|
| MV_Schw | C  | 10259 | 70  | 1 |                   | 1  |
| MV_Schw | A  | 10260 | 4   | 0 |                   | 1  |
| MV_Schw | T  | 10261 | 8   | 0 |                   | 1  |
| MV_Schw | NA | 10262 | 0   | 0 |                   | NA |
| MV_Schw | C  | 10263 | 12  | 0 |                   | 1  |
| MV_Schw | A  | 10264 | 17  | 0 |                   | 1  |
| MV_Schw | T  | 10265 | 4   | 0 |                   | 1  |
| MV_Schw | C  | 10266 | 54  | 0 | 0.950262622850522 |    |
| MV_Schw | T  | 10267 | 48  | 1 |                   | 1  |
| MV_Schw | G  | 10268 | 105 | 0 | 0.37877131423274  |    |
| MV_Schw | A  | 10269 | 6   | 0 |                   | 1  |
| MV_Schw | C  | 10270 | 267 | 2 | 0.355295708921217 |    |
| MV_Schw | A  | 10271 | 14  | 0 |                   | 1  |
| MV_Schw | G  | 10272 | 14  | 0 |                   | 1  |
| MV_Schw | G  | 10273 | 54  | 0 | 0.950262622850522 |    |
| MV_Schw | G  | 10274 | 95  | 1 |                   | 1  |
| MV_Schw | G  | 10275 | 120 | 2 |                   | 1  |
| MV_Schw | A  | 10276 | 4   | 0 |                   | 1  |
| MV_Schw | G  | 10277 | 254 | 2 | 0.436962346550212 |    |
| MV_Schw | A  | 10278 | 103 | 1 | 0.944879389258477 |    |
| MV_Schw | T  | 10279 | 27  | 0 |                   | 1  |
| MV_Schw | T  | 10280 | 10  | 0 |                   | 1  |
| MV_Schw | T  | 10281 | 21  | 0 |                   | 1  |
| MV_Schw | T  | 10282 | 27  | 1 | 0.752394317790241 |    |
| MV_Schw | C  | 10283 | 161 | 1 | 0.78470776546672  |    |
| MV_Schw | T  | 10284 | 33  | 0 |                   | 1  |
| MV_Schw | C  | 10285 | 47  | 0 |                   | 1  |
| MV_Schw | A  | 10286 | 87  | 2 |                   | 1  |
| MV_Schw | T  | 10287 | 10  | 0 |                   | 1  |
| MV_Schw | T  | 10288 | 21  | 0 |                   | 1  |
| MV_Schw | T  | 10289 | 6   | 0 |                   | 1  |
| MV_Schw | T  | 10290 | 41  | 1 |                   | 1  |
| MV_Schw | T  | 10291 | 23  | 1 |                   | 1  |
| MV_Schw | C  | 10292 | 176 | 3 |                   | 1  |
| MV_Schw | A  | 10293 | 43  | 1 | 0.950262622850522 |    |
| MV_Schw | G  | 10294 | 89  | 4 | 0.372808321584263 |    |

|         |   |       |     |   |                   |
|---------|---|-------|-----|---|-------------------|
| MV_Schw | A | 10295 | 8   | 0 | 1                 |
| MV_Schw | A | 10296 | 2   | 0 | 1                 |
| MV_Schw | G | 10297 | 43  | 1 | 1                 |
| MV_Schw | T | 10298 | 10  | 0 | 1                 |
| MV_Schw | T | 10299 | 35  | 0 | 1                 |
| MV_Schw | T | 10300 | 112 | 1 | 0.789229943133706 |
| MV_Schw | C | 10301 | 211 | 3 | 0.957721317456694 |
| MV_Schw | G | 10302 | 374 | 3 | 0.151825348330209 |
| MV_Schw | G | 10303 | 368 | 5 | 0.799284242354531 |
| MV_Schw | C | 10304 | 262 | 4 | 1                 |
| MV_Schw | C | 10305 | 19  | 1 | 1                 |
| MV_Schw | A | 10306 | 4   | 0 | 1                 |
| MV_Schw | C | 10307 | 41  | 1 | 0.945767847051808 |
| MV_Schw | C | 10308 | 56  | 0 | 0.950262622850522 |
| MV_Schw | C | 10309 | 320 | 2 | 0.19464237982122  |
| MV_Schw | C | 10310 | 345 | 5 | 0.896450176326918 |
| MV_Schw | A | 10311 | 21  | 0 | 1                 |
| MV_Schw | G | 10312 | 91  | 0 | 0.497615650989996 |
| MV_Schw | A | 10313 | 43  | 1 | 1                 |
| MV_Schw | C | 10314 | 176 | 1 | 0.34703042205032  |
| MV_Schw | T | 10315 | 16  | 0 | 1                 |
| MV_Schw | T | 10316 | 27  | 0 | 1                 |
| MV_Schw | G | 10317 | 95  | 1 | 1                 |
| MV_Schw | A | 10318 | 17  | 0 | 1                 |
| MV_Schw | A | 10319 | 81  | 1 | 1                 |
| MV_Schw | G | 10320 | 159 | 0 | 0.118907467124559 |
| MV_Schw | C | 10321 | 37  | 1 | 0.88950624150852  |
| MV_Schw | A | 10322 | 4   | 0 | 1                 |
| MV_Schw | G | 10323 | 43  | 2 | 0.632968068765344 |
| MV_Schw | T | 10324 | 48  | 1 | 1                 |
| MV_Schw | A | 10325 | 48  | 0 | 0.950262622850522 |
| MV_Schw | A | 10326 | 4   | 0 | 1                 |
| MV_Schw | C | 10327 | 143 | 2 | 1                 |
| MV_Schw | G | 10328 | 66  | 1 | 1                 |
| MV_Schw | G | 10329 | 16  | 0 | 1                 |
| MV_Schw | C | 10330 | 91  | 2 | 1                 |



|         |   |       |     |   |                   |
|---------|---|-------|-----|---|-------------------|
| MV_Schw | T | 10331 | 17  | 1 | 0.983041048229953 |
| MV_Schw | G | 10332 | 25  | 0 | 1                 |
| MV_Schw | C | 10333 | 43  | 1 | 1                 |
| MV_Schw | T | 10334 | 110 | 1 | 1                 |
| MV_Schw | G | 10335 | 174 | 1 | 0.648224297390367 |
| MV_Schw | A | 10336 | 43  | 1 | 1                 |
| MV_Schw | A | 10337 | 17  | 0 | 1                 |
| MV_Schw | A | 10338 | 12  | 0 | 1                 |
| MV_Schw | A | 10339 | 17  | 0 | 1                 |
| MV_Schw | T | 10340 | 37  | 0 | 1                 |
| MV_Schw | G | 10341 | 58  | 0 | 0.953489044526869 |
| MV_Schw | T | 10342 | 29  | 1 | 1                 |
| MV_Schw | T | 10343 | 17  | 0 | 1                 |
| MV_Schw | A | 10344 | 29  | 0 | 1                 |
| MV_Schw | G | 10345 | 74  | 0 | 0.795198078226602 |
| MV_Schw | G | 10346 | 109 | 1 | 0.947544583923452 |
| MV_Schw | A | 10347 | 35  | 1 | 1                 |
| MV_Schw | A | 10348 | 19  | 0 | 1                 |
| MV_Schw | A | 10349 | 14  | 0 | 1                 |
| MV_Schw | T | 10350 | 68  | 1 | 1                 |
| MV_Schw | A | 10351 | 8   | 1 | 0.789229943133706 |
| MV_Schw | C | 10352 | 407 | 2 | 0.04153264858246  |
| MV_Schw | A | 10353 | 50  | 0 | 0.950262622850522 |
| MV_Schw | T | 10354 | 8   | 0 | 1                 |
| MV_Schw | G | 10355 | 45  | 0 | 1                 |
| MV_Schw | A | 10356 | 25  | 0 | 1                 |
| MV_Schw | A | 10357 | 37  | 0 | 1                 |
| MV_Schw | T | 10358 | 37  | 0 | 1                 |
| MV_Schw | C | 10359 | 39  | 0 | 1                 |
| MV_Schw | A | 10360 | 6   | 1 | 0.704667204683568 |
| MV_Schw | G | 10361 | 58  | 0 | 0.953489044526869 |
| MV_Schw | C | 10362 | 165 | 1 | 0.444605338381727 |
| MV_Schw | C | 10363 | 68  | 0 | 0.789229943133706 |
| MV_Schw | T | 10364 | 17  | 0 | 1                 |
| MV_Schw | A | 10365 | 14  | 0 | 1                 |
| MV_Schw | A | 10366 | 23  | 0 | 1                 |

|         |   |       |     |   |                    |   |
|---------|---|-------|-----|---|--------------------|---|
| MV_Schw | A | 10367 | 12  | 0 |                    | 1 |
| MV_Schw | G | 10368 | 169 | 1 | 0.341186273229673  |   |
| MV_Schw | T | 10369 | 21  | 0 |                    | 1 |
| MV_Schw | C | 10370 | 10  | 0 |                    | 1 |
| MV_Schw | A | 10371 | 72  | 0 | 0.791667533131283  |   |
| MV_Schw | T | 10372 | 14  | 0 |                    | 1 |
| MV_Schw | T | 10373 | 60  | 0 | 0.957721317456694  |   |
| MV_Schw | G | 10374 | 19  | 0 |                    | 1 |
| MV_Schw | T | 10375 | 2   | 0 |                    | 1 |
| MV_Schw | G | 10376 | 31  | 0 |                    | 1 |
| MV_Schw | T | 10377 | 8   | 0 |                    | 1 |
| MV_Schw | A | 10378 | 78  | 0 | 0.638894311640422  |   |
| MV_Schw | T | 10379 | 120 | 1 | 0.789229943133706  |   |
| MV_Schw | G | 10380 | 89  | 0 | 0.497615650989996  |   |
| MV_Schw | A | 10381 | 2   | 1 | 0.0802641948298692 |   |
| MV_Schw | G | 10382 | 110 | 2 |                    | 1 |
| MV_Schw | A | 10383 | 4   | 0 |                    | 1 |
| MV_Schw | C | 10384 | 320 | 1 | 0.0138245907553782 |   |
| MV_Schw | T | 10385 | 14  | 0 |                    | 1 |
| MV_Schw | C | 10386 | 66  | 1 |                    | 1 |
| MV_Schw | T | 10387 | 54  | 0 | 0.950262622850522  |   |
| MV_Schw | G | 10388 | 178 | 2 | 0.945767847051808  |   |
| MV_Schw | A | 10389 | 105 | 0 | 0.37877131423274   |   |
| MV_Schw | T | 10390 | 124 | 1 | 0.791667533131283  |   |
| MV_Schw | G | 10391 | 202 | 2 | 0.822598489333375  |   |
| MV_Schw | A | 10392 | 27  | 0 |                    | 1 |
| MV_Schw | A | 10393 | 14  | 0 |                    | 1 |
| MV_Schw | A | 10394 | 39  | 1 |                    | 1 |
| MV_Schw | G | 10395 | 165 | 3 |                    | 1 |
| MV_Schw | G | 10396 | 155 | 1 | 0.436311974989592  |   |
| MV_Schw | T | 10397 | 16  | 0 |                    | 1 |
| MV_Schw | C | 10398 | 35  | 0 |                    | 1 |
| MV_Schw | A | 10399 | 116 | 1 |                    | 1 |
| MV_Schw | T | 10400 | 41  | 0 |                    | 1 |
| MV_Schw | G | 10401 | 262 | 1 | 0.069912848140492  |   |
| MV_Schw | C | 10402 | 31  | 0 |                    | 1 |

|         |   |       |     |   |                   |
|---------|---|-------|-----|---|-------------------|
| MV_Schw | C | 10403 | 58  | 0 | 0.953489044526869 |
| MV_Schw | A | 10404 | 4   | 1 | 0.619556855087002 |
| MV_Schw | T | 10405 | 6   | 0 | 1                 |
| MV_Schw | A | 10406 | 85  | 0 | 0.648224297390367 |
| MV_Schw | T | 10407 | 6   | 0 | 1                 |
| MV_Schw | T | 10408 | 25  | 1 | 1                 |
| MV_Schw | T | 10409 | 23  | 1 | 1                 |
| MV_Schw | T | 10410 | 74  | 0 | 0.795198078226602 |
| MV_Schw | G | 10411 | 494 | 5 | 0.216898329554315 |
| MV_Schw | T | 10412 | 74  | 0 | 0.795198078226602 |
| MV_Schw | G | 10413 | 54  | 1 | 1                 |
| MV_Schw | G | 10414 | 27  | 1 | 1                 |
| MV_Schw | A | 10415 | 4   | 0 | 1                 |
| MV_Schw | A | 10416 | 50  | 0 | 0.950262622850522 |
| MV_Schw | T | 10417 | 97  | 0 | 0.503192867159235 |
| MV_Schw | C | 10418 | 85  | 1 | 1                 |
| MV_Schw | A | 10419 | 79  | 1 | 1                 |
| MV_Schw | T | 10420 | 35  | 0 | 1                 |
| MV_Schw | A | 10421 | 58  | 0 | 0.953489044526869 |
| MV_Schw | A | 10422 | 54  | 2 | 0.789229943133706 |
| MV_Schw | T | 10423 | 62  | 0 | 0.789229943133706 |
| MV_Schw | C | 10424 | 140 | 1 | 0.542247232322076 |
| MV_Schw | A | 10425 | 83  | 1 | 1                 |
| MV_Schw | A | 10426 | 14  | 0 | 1                 |
| MV_Schw | C | 10427 | 552 | 5 | 0.208122570589857 |
| MV_Schw | G | 10428 | 89  | 1 | 1                 |
| MV_Schw | G | 10429 | 27  | 0 | 1                 |
| MV_Schw | C | 10430 | 66  | 2 | 1                 |
| MV_Schw | T | 10431 | 6   | 0 | 1                 |
| MV_Schw | A | 10432 | 91  | 1 | 1                 |
| MV_Schw | T | 10433 | 10  | 1 | 0.822598489333375 |
| MV_Schw | C | 10434 | 43  | 0 | 1                 |
| MV_Schw | G | 10435 | 248 | 1 | 0.233813270352997 |
| MV_Schw | T | 10436 | 64  | 1 | 1                 |
| MV_Schw | G | 10437 | 110 | 0 | 0.385864542883514 |
| MV_Schw | A | 10438 | 74  | 0 | 0.795198078226602 |

|         |   |       |     |   |                    |
|---------|---|-------|-----|---|--------------------|
| MV_Schw | C | 10439 | 403 | 3 | 0.0931787203291559 |
| MV_Schw | A | 10440 | 19  | 0 | 1                  |
| MV_Schw | G | 10441 | 60  | 1 | 1                  |
| MV_Schw | G | 10442 | 56  | 1 | 1                  |
| MV_Schw | C | 10443 | 298 | 4 | 0.950262622850522  |
| MV_Schw | A | 10444 | 66  | 1 | 1                  |
| MV_Schw | C | 10445 | 37  | 1 | 0.88950624150852   |
| MV_Schw | G | 10446 | 70  | 0 | 0.789229943133706  |
| MV_Schw | G | 10447 | 47  | 0 | 1                  |
| MV_Schw | A | 10448 | 58  | 1 | 1                  |
| MV_Schw | G | 10449 | 120 | 1 | 0.789229943133706  |
| MV_Schw | G | 10450 | 21  | 1 | 1                  |
| MV_Schw | C | 10451 | 93  | 1 | 1                  |
| MV_Schw | A | 10452 | 43  | 1 | 1                  |
| MV_Schw | G | 10453 | 140 | 1 | 0.542247232322076  |
| MV_Schw | T | 10454 | 39  | 1 | 1                  |
| MV_Schw | T | 10455 | 33  | 0 | 1                  |
| MV_Schw | G | 10456 | 122 | 0 | 0.298485329352986  |
| MV_Schw | G | 10457 | 56  | 0 | 0.950262622850522  |
| MV_Schw | C | 10458 | 161 | 0 | 0.119516505590852  |
| MV_Schw | C | 10459 | 161 | 1 | 0.78470776546672   |
| MV_Schw | A | 10460 | 45  | 1 | 1                  |
| MV_Schw | C | 10461 | 132 | 1 | 0.983041048229953  |
| MV_Schw | C | 10462 | 167 | 0 | 0.124094801360285  |
| MV_Schw | G | 10463 | 138 | 1 | 0.673422966374487  |
| MV_Schw | C | 10464 | 316 | 1 | 0.0202604711578266 |
| MV_Schw | T | 10465 | 45  | 0 | 1                  |
| MV_Schw | G | 10466 | 103 | 6 | 0.071237197691116  |
| MV_Schw | A | 10467 | 21  | 0 | 1                  |
| MV_Schw | C | 10468 | 122 | 2 | 1                  |
| MV_Schw | C | 10469 | 47  | 1 | 1                  |
| MV_Schw | C | 10470 | 19  | 1 | 1                  |
| MV_Schw | T | 10471 | 6   | 0 | 1                  |
| MV_Schw | C | 10472 | 16  | 0 | 1                  |
| MV_Schw | C | 10473 | 76  | 1 | 1                  |
| MV_Schw | C | 10474 | 89  | 2 | 1                  |

|         |   |       |     |   |                   |   |
|---------|---|-------|-----|---|-------------------|---|
| MV_Schw | C | 10475 | 101 | 1 |                   | 1 |
| MV_Schw | C | 10476 | 64  | 0 | 0.789229943133706 |   |
| MV_Schw | T | 10477 | 16  | 0 |                   | 1 |
| MV_Schw | G | 10478 | 76  | 1 |                   | 1 |
| MV_Schw | C | 10479 | 54  | 0 | 0.950262622850522 |   |
| MV_Schw | A | 10480 | 93  | 0 | 0.498091317793217 |   |
| MV_Schw | T | 10481 | 8   | 0 |                   | 1 |
| MV_Schw | G | 10482 | 35  | 0 |                   | 1 |
| MV_Schw | C | 10483 | 31  | 1 |                   | 1 |
| MV_Schw | T | 10484 | 62  | 0 | 0.789229943133706 |   |
| MV_Schw | G | 10485 | 78  | 1 |                   | 1 |
| MV_Schw | C | 10486 | 440 | 3 | 0.120643557016605 |   |
| MV_Schw | A | 10487 | 33  | 1 |                   | 1 |
| MV_Schw | G | 10488 | 134 | 4 | 0.8790631473823   |   |
| MV_Schw | A | 10489 | 27  | 0 |                   | 1 |
| MV_Schw | C | 10490 | 78  | 1 |                   | 1 |
| MV_Schw | A | 10491 | 10  | 0 |                   | 1 |
| MV_Schw | C | 10492 | 19  | 0 |                   | 1 |
| MV_Schw | A | 10493 | 50  | 2 | 0.746970975838775 |   |
| MV_Schw | A | 10494 | 27  | 0 |                   | 1 |
| MV_Schw | T | 10495 | 48  | 0 | 0.950262622850522 |   |
| MV_Schw | C | 10496 | 287 | 4 |                   | 1 |
| MV_Schw | C | 10497 | 68  | 1 |                   | 1 |
| MV_Schw | G | 10498 | 78  | 0 | 0.638894311640422 |   |
| MV_Schw | G | 10499 | 349 | 3 | 0.238369782241552 |   |
| MV_Schw | A | 10500 | 198 | 2 | 0.822598489333375 |   |
| MV_Schw | A | 10501 | 48  | 2 | 0.709032941865358 |   |
| MV_Schw | T | 10502 | 54  | 0 | 0.950262622850522 |   |
| MV_Schw | G | 10503 | 21  | 0 |                   | 1 |
| MV_Schw | C | 10504 | 95  | 1 |                   | 1 |
| MV_Schw | T | 10505 | 72  | 2 |                   | 1 |
| MV_Schw | C | 10506 | 151 | 2 |                   | 1 |
| MV_Schw | A | 10507 | 70  | 1 |                   | 1 |
| MV_Schw | A | 10508 | 23  | 1 |                   | 1 |
| MV_Schw | G | 10509 | 190 | 1 | 0.542247232322076 |   |
| MV_Schw | C | 10510 | 91  | 0 | 0.497615650989996 |   |

|         |   |       |     |   |                   |   |
|---------|---|-------|-----|---|-------------------|---|
| MV_Schw | T | 10511 | 62  | 1 |                   | 1 |
| MV_Schw | T | 10512 | 8   | 0 |                   | 1 |
| MV_Schw | C | 10513 | 45  | 1 |                   | 1 |
| MV_Schw | A | 10514 | 116 | 1 | 0.789229943133706 |   |
| MV_Schw | G | 10515 | 60  | 1 |                   | 1 |
| MV_Schw | G | 10516 | 70  | 1 |                   | 1 |
| MV_Schw | T | 10517 | 35  | 1 |                   | 1 |
| MV_Schw | G | 10518 | 50  | 0 | 0.950262622850522 |   |
| MV_Schw | A | 10519 | 6   | 0 |                   | 1 |
| MV_Schw | A | 10520 | 78  | 0 | 0.638894311640422 |   |
| MV_Schw | G | 10521 | 186 | 1 | 0.655978174231774 |   |
| MV_Schw | G | 10522 | 105 | 2 |                   | 1 |
| MV_Schw | G | 10523 | 132 | 0 | 0.222002676269896 |   |
| MV_Schw | T | 10524 | 29  | 1 |                   | 1 |
| MV_Schw | T | 10525 | 35  | 0 |                   | 1 |
| MV_Schw | A | 10526 | 43  | 0 |                   | 1 |
| MV_Schw | A | 10527 | 16  | 0 |                   | 1 |
| MV_Schw | C | 10528 | 260 | 2 | 0.440038484535617 |   |
| MV_Schw | A | 10529 | 56  | 0 | 0.950262622850522 |   |
| MV_Schw | C | 10530 | 56  | 1 |                   | 1 |
| MV_Schw | A | 10531 | 50  | 0 | 0.950262622850522 |   |
| MV_Schw | T | 10532 | 56  | 0 | 0.950262622850522 |   |
| MV_Schw | G | 10533 | 85  | 0 | 0.648224297390367 |   |
| MV_Schw | A | 10534 | 6   | 0 |                   | 1 |
| MV_Schw | G | 10535 | 312 | 3 | 0.426944048601293 |   |
| MV_Schw | C | 10536 | 16  | 0 |                   | 1 |
| MV_Schw | A | 10537 | 47  | 1 |                   | 1 |
| MV_Schw | G | 10538 | 85  | 1 |                   | 1 |
| MV_Schw | T | 10539 | 45  | 0 |                   | 1 |
| MV_Schw | G | 10540 | 83  | 1 |                   | 1 |
| MV_Schw | C | 10541 | 122 | 0 | 0.298485329352986 |   |
| MV_Schw | G | 10542 | 171 | 1 | 0.789229943133706 |   |
| MV_Schw | T | 10543 | 47  | 0 |                   | 1 |
| MV_Schw | T | 10544 | 87  | 0 | 0.653463094391213 |   |
| MV_Schw | G | 10545 | 141 | 1 | 0.989441011726102 |   |
| MV_Schw | A | 10546 | 4   | 0 |                   | 1 |

|         |   |       |     |   |                    |
|---------|---|-------|-----|---|--------------------|
| MV_Schw | T | 10547 | 29  | 1 | 0.789229943133706  |
| MV_Schw | A | 10548 | 45  | 0 | 1                  |
| MV_Schw | A | 10549 | 10  | 0 | 1                  |
| MV_Schw | C | 10550 | 116 | 1 | 1                  |
| MV_Schw | T | 10551 | 78  | 1 | 1                  |
| MV_Schw | G | 10552 | 151 | 0 | 0.166500460032885  |
| MV_Schw | G | 10553 | 188 | 1 | 0.542247232322076  |
| MV_Schw | A | 10554 | 68  | 1 | 1                  |
| MV_Schw | A | 10555 | 74  | 0 | 0.795198078226602  |
| MV_Schw | A | 10556 | 31  | 0 | 1                  |
| MV_Schw | T | 10557 | 23  | 0 | 1                  |
| MV_Schw | C | 10558 | 70  | 1 | 1                  |
| MV_Schw | T | 10559 | 126 | 0 | 0.305061614162072  |
| MV_Schw | T | 10560 | 99  | 0 | 0.509396577320122  |
| MV_Schw | T | 10561 | 47  | 0 | 1                  |
| MV_Schw | T | 10562 | 62  | 1 | 1                  |
| MV_Schw | G | 10563 | 234 | 2 | 0.638894311640422  |
| MV_Schw | C | 10564 | 188 | 2 | 0.950262622850522  |
| MV_Schw | T | 10565 | 10  | 0 | 1                  |
| MV_Schw | G | 10566 | 47  | 0 | 1                  |
| MV_Schw | G | 10567 | 10  | 0 | 1                  |
| MV_Schw | A | 10568 | 35  | 0 | 1                  |
| MV_Schw | G | 10569 | 554 | 9 | 0.950262622850522  |
| MV_Schw | T | 10570 | 136 | 1 | 0.983041048229953  |
| MV_Schw | G | 10571 | 172 | 0 | 0.0854265304031386 |
| MV_Schw | A | 10572 | 33  | 0 | 1                  |
| MV_Schw | A | 10573 | 110 | 2 | 1                  |
| MV_Schw | A | 10574 | 99  | 2 | 1                  |
| MV_Schw | T | 10575 | 184 | 1 | 0.277229700444564  |
| MV_Schw | T | 10576 | 10  | 0 | 1                  |
| MV_Schw | T | 10577 | 37  | 0 | 1                  |
| MV_Schw | G | 10578 | 153 | 1 | 0.436311974989592  |
| MV_Schw | G | 10579 | 91  | 2 | 1                  |
| MV_Schw | C | 10580 | 351 | 3 | 0.396483090598345  |
| MV_Schw | T | 10581 | 6   | 0 | 1                  |
| MV_Schw | G | 10582 | 70  | 1 | 1                  |

|         |   |       |     |   |                    |   |
|---------|---|-------|-----|---|--------------------|---|
| MV_Schw | C | 10583 | 79  | 1 |                    | 1 |
| MV_Schw | T | 10584 | 39  | 1 |                    | 1 |
| MV_Schw | T | 10585 | 50  | 0 | 0.950262622850522  |   |
| MV_Schw | T | 10586 | 109 | 0 | 0.381672248067152  |   |
| MV_Schw | A | 10587 | 14  | 1 | 0.944879389258477  |   |
| MV_Schw | T | 10588 | 58  | 1 |                    | 1 |
| MV_Schw | G | 10589 | 85  | 1 |                    | 1 |
| MV_Schw | C | 10590 | 33  | 0 |                    | 1 |
| MV_Schw | C | 10591 | 31  | 0 |                    | 1 |
| MV_Schw | T | 10592 | 12  | 0 |                    | 1 |
| MV_Schw | C | 10593 | 58  | 1 |                    | 1 |
| MV_Schw | T | 10594 | 14  | 0 |                    | 1 |
| MV_Schw | T | 10595 | 23  | 1 |                    | 1 |
| MV_Schw | A | 10596 | 27  | 0 |                    | 1 |
| MV_Schw | G | 10597 | 87  | 0 | 0.653463094391213  |   |
| MV_Schw | C | 10598 | 141 | 5 | 0.56469466203941   |   |
| MV_Schw | C | 10599 | 89  | 1 |                    | 1 |
| MV_Schw | T | 10600 | 64  | 1 |                    | 1 |
| MV_Schw | G | 10601 | 95  | 1 |                    | 1 |
| MV_Schw | G | 10602 | 91  | 2 |                    | 1 |
| MV_Schw | A | 10603 | 29  | 0 |                    | 1 |
| MV_Schw | T | 10604 | 95  | 2 |                    | 1 |
| MV_Schw | A | 10605 | 16  | 0 |                    | 1 |
| MV_Schw | G | 10606 | 78  | 0 | 0.638894311640422  |   |
| MV_Schw | T | 10607 | 27  | 0 |                    | 1 |
| MV_Schw | G | 10608 | 97  | 0 | 0.503192867159235  |   |
| MV_Schw | A | 10609 | 182 | 2 | 0.946416176064202  |   |
| MV_Schw | T | 10610 | 10  | 1 | 0.822598489333375  |   |
| MV_Schw | C | 10611 | 184 | 1 | 0.653463094391213  |   |
| MV_Schw | T | 10612 | 634 | 5 | 0.0293543428201476 |   |
| MV_Schw | G | 10613 | 91  | 1 |                    | 1 |
| MV_Schw | A | 10614 | 4   | 0 |                    | 1 |
| MV_Schw | C | 10615 | 207 | 1 | 0.444112248634472  |   |
| MV_Schw | A | 10616 | 120 | 1 |                    | 1 |
| MV_Schw | A | 10617 | 16  | 0 |                    | 1 |
| MV_Schw | T | 10618 | 47  | 1 |                    | 1 |



|         |   |       |     |   |                   |   |
|---------|---|-------|-----|---|-------------------|---|
| MV_Schw | G | 10619 | 25  | 0 |                   | 1 |
| MV_Schw | T | 10620 | 6   | 0 |                   | 1 |
| MV_Schw | A | 10621 | 6   | 0 |                   | 1 |
| MV_Schw | C | 10622 | 97  | 1 |                   | 1 |
| MV_Schw | C | 10623 | 35  | 0 |                   | 1 |
| MV_Schw | T | 10624 | 14  | 1 | 0.944879389258477 |   |
| MV_Schw | A | 10625 | 66  | 0 | 0.789229943133706 |   |
| MV_Schw | A | 10626 | 12  | 0 |                   | 1 |
| MV_Schw | A | 10627 | 60  | 1 |                   | 1 |
| MV_Schw | G | 10628 | 300 | 3 | 0.422936221821337 |   |
| MV_Schw | G | 10629 | 45  | 0 |                   | 1 |
| MV_Schw | A | 10630 | 4   | 0 |                   | 1 |
| MV_Schw | C | 10631 | 47  | 0 |                   | 1 |
| MV_Schw | A | 10632 | 47  | 1 |                   | 1 |
| MV_Schw | A | 10633 | 41  | 0 |                   | 1 |
| MV_Schw | G | 10634 | 163 | 1 | 0.785635770321324 |   |
| MV_Schw | G | 10635 | 58  | 1 |                   | 1 |
| MV_Schw | C | 10636 | 52  | 1 |                   | 1 |
| MV_Schw | A | 10637 | 10  | 0 |                   | 1 |
| MV_Schw | C | 10638 | 70  | 1 |                   | 1 |
| MV_Schw | T | 10639 | 12  | 1 | 0.88950624150852  |   |
| MV_Schw | T | 10640 | 101 | 1 | 0.944879389258477 |   |
| MV_Schw | G | 10641 | 89  | 0 | 0.497615650989996 |   |
| MV_Schw | C | 10642 | 202 | 1 | 0.551026371204373 |   |
| MV_Schw | T | 10643 | 25  | 0 |                   | 1 |
| MV_Schw | G | 10644 | 105 | 0 | 0.37877131423274  |   |
| MV_Schw | C | 10645 | 93  | 1 |                   | 1 |
| MV_Schw | T | 10646 | 10  | 0 |                   | 1 |
| MV_Schw | C | 10647 | 39  | 0 |                   | 1 |
| MV_Schw | T | 10648 | 37  | 1 |                   | 1 |
| MV_Schw | C | 10649 | 52  | 1 |                   | 1 |
| MV_Schw | C | 10650 | 41  | 0 |                   | 1 |
| MV_Schw | A | 10651 | 39  | 0 |                   | 1 |
| MV_Schw | A | 10652 | 56  | 1 |                   | 1 |
| MV_Schw | A | 10653 | 48  | 1 |                   | 1 |
| MV_Schw | G | 10654 | 72  | 1 |                   | 1 |

|         |   |       |     |   |                   |   |
|---------|---|-------|-----|---|-------------------|---|
| MV_Schw | G | 10655 | 10  | 0 |                   | 1 |
| MV_Schw | G | 10656 | 10  | 0 |                   | 1 |
| MV_Schw | A | 10657 | 14  | 0 |                   | 1 |
| MV_Schw | A | 10658 | 89  | 1 |                   | 1 |
| MV_Schw | T | 10659 | 74  | 1 |                   | 1 |
| MV_Schw | G | 10660 | 27  | 1 |                   | 1 |
| MV_Schw | G | 10661 | 12  | 0 |                   | 1 |
| MV_Schw | G | 10662 | 33  | 1 |                   | 1 |
| MV_Schw | A | 10663 | 62  | 2 | 0.991517221373143 |   |
| MV_Schw | T | 10664 | 56  | 0 | 0.950262622850522 |   |
| MV_Schw | T | 10665 | 19  | 0 |                   | 1 |
| MV_Schw | C | 10666 | 45  | 1 |                   | 1 |
| MV_Schw | A | 10667 | 10  | 0 |                   | 1 |
| MV_Schw | G | 10668 | 438 | 6 | 0.789229943133706 |   |
| MV_Schw | T | 10669 | 85  | 1 |                   | 1 |
| MV_Schw | T | 10670 | 10  | 0 |                   | 1 |
| MV_Schw | T | 10671 | 16  | 0 |                   | 1 |
| MV_Schw | A | 10672 | 12  | 0 |                   | 1 |
| MV_Schw | C | 10673 | 79  | 1 |                   | 1 |
| MV_Schw | C | 10674 | 248 | 7 | 0.939506000333287 |   |
| MV_Schw | C | 10675 | 105 | 1 | 0.944944073306986 |   |
| MV_Schw | G | 10676 | 132 | 0 | 0.222002676269896 |   |
| MV_Schw | A | 10677 | 10  | 0 |                   | 1 |
| MV_Schw | A | 10678 | 112 | 1 | 0.789229943133706 |   |
| MV_Schw | A | 10679 | 109 | 1 |                   | 1 |
| MV_Schw | G | 10680 | 275 | 3 | 0.819327818667335 |   |
| MV_Schw | A | 10681 | 10  | 0 |                   | 1 |
| MV_Schw | G | 10682 | 79  | 1 |                   | 1 |
| MV_Schw | T | 10683 | 58  | 1 |                   | 1 |
| MV_Schw | T | 10684 | 48  | 1 |                   | 1 |
| MV_Schw | C | 10685 | 186 | 2 | 0.948552432136014 |   |
| MV_Schw | C | 10686 | 217 | 3 | 0.957721317456694 |   |
| MV_Schw | T | 10687 | 128 | 1 | 0.658415249679101 |   |
| MV_Schw | G | 10688 | 279 | 3 | 0.819327818667335 |   |
| MV_Schw | C | 10689 | 157 | 1 | 0.436962346550212 |   |
| MV_Schw | G | 10690 | 213 | 1 | 0.449295143732283 |   |

|         |    |       |     |   |                   |    |
|---------|----|-------|-----|---|-------------------|----|
| MV_Schw | T  | 10691 | 19  | 1 |                   | 1  |
| MV_Schw | T  | 10692 | 37  | 0 |                   | 1  |
| MV_Schw | A  | 10693 | 29  | 1 |                   | 1  |
| MV_Schw | C  | 10694 | 114 | 1 | 0.789229943133706 |    |
| MV_Schw | G  | 10695 | 37  | 0 |                   | 1  |
| MV_Schw | A  | 10696 | 54  | 0 | 0.950262622850522 |    |
| MV_Schw | C  | 10697 | 190 | 3 |                   | 1  |
| MV_Schw | C  | 10698 | 6   | 1 | 0.704667204683568 |    |
| MV_Schw | C  | 10699 | 31  | 0 |                   | 1  |
| MV_Schw | T  | 10700 | 12  | 1 | 0.88950624150852  |    |
| MV_Schw | C  | 10701 | 37  | 1 |                   | 1  |
| MV_Schw | C  | 10702 | 52  | 0 | 0.950262622850522 |    |
| MV_Schw | C  | 10703 | 19  | 1 |                   | 1  |
| MV_Schw | A  | 10704 | 52  | 0 | 0.950262622850522 |    |
| MV_Schw | A  | 10705 | 37  | 1 |                   | 1  |
| MV_Schw | G  | 10706 | 79  | 3 | 0.882548734849042 |    |
| MV_Schw | G  | 10707 | 19  | 0 |                   | 1  |
| MV_Schw | G  | 10708 | 29  | 1 |                   | 1  |
| MV_Schw | A  | 10709 | 10  | 1 | 0.822598489333375 |    |
| MV_Schw | A  | 10710 | 8   | 1 | 0.789229943133706 |    |
| MV_Schw | C  | 10711 | 93  | 3 |                   | 1  |
| MV_Schw | C  | 10712 | 35  | 0 |                   | 1  |
| MV_Schw | G  | 10713 | 64  | 0 | 0.789229943133706 |    |
| MV_Schw | G  | 10714 | 35  | 1 |                   | 1  |
| MV_Schw | G  | 10715 | 171 | 3 |                   | 1  |
| MV_Schw | NA | 10716 | 0   | 0 |                   | NA |
| MV_Schw | C  | 10717 | 79  | 3 | 0.882548734849042 |    |
| MV_Schw | A  | 10718 | 45  | 0 |                   | 1  |
| MV_Schw | C  | 10719 | 140 | 2 |                   | 1  |
| MV_Schw | G  | 10720 | 145 | 1 | 0.88950624150852  |    |
| MV_Schw | G  | 10721 | 95  | 1 |                   | 1  |
| MV_Schw | A  | 10722 | 10  | 0 |                   | 1  |
| MV_Schw | G  | 10723 | 103 | 0 | 0.37877131423274  |    |
| MV_Schw | G  | 10724 | 37  | 1 |                   | 1  |
| MV_Schw | C  | 10725 | 140 | 3 |                   | 1  |
| MV_Schw | T  | 10726 | 14  | 0 |                   | 1  |

|         |   |       |     |   |                    |   |
|---------|---|-------|-----|---|--------------------|---|
| MV_Schw | T | 10727 | 41  | 1 |                    | 1 |
| MV_Schw | G | 10728 | 116 | 1 | 0.789229943133706  |   |
| MV_Schw | T | 10729 | 8   | 0 |                    | 1 |
| MV_Schw | A | 10730 | 21  | 0 |                    | 1 |
| MV_Schw | G | 10731 | 54  | 1 |                    | 1 |
| MV_Schw | A | 10732 | 2   | 0 |                    | 1 |
| MV_Schw | T | 10733 | 6   | 0 |                    | 1 |
| MV_Schw | G | 10734 | 171 | 3 |                    | 1 |
| MV_Schw | T | 10735 | 2   | 0 |                    | 1 |
| MV_Schw | T | 10736 | 14  | 0 |                    | 1 |
| MV_Schw | T | 10737 | 10  | 0 |                    | 1 |
| MV_Schw | T | 10738 | 56  | 1 |                    | 1 |
| MV_Schw | C | 10739 | 39  | 1 |                    | 1 |
| MV_Schw | C | 10740 | 118 | 1 | 0.789229943133706  |   |
| MV_Schw | T | 10741 | 6   | 0 |                    | 1 |
| MV_Schw | T | 10742 | 10  | 1 | 0.822598489333375  |   |
| MV_Schw | A | 10743 | 64  | 1 |                    | 1 |
| MV_Schw | A | 10744 | 12  | 0 |                    | 1 |
| MV_Schw | T | 10745 | 14  | 0 |                    | 1 |
| MV_Schw | G | 10746 | 19  | 0 |                    | 1 |
| MV_Schw | A | 10747 | 23  | 0 |                    | 1 |
| MV_Schw | T | 10748 | 21  | 0 |                    | 1 |
| MV_Schw | T | 10749 | 81  | 0 | 0.641186461810141  |   |
| MV_Schw | C | 10750 | 188 | 4 |                    | 1 |
| MV_Schw | G | 10751 | 33  | 0 |                    | 1 |
| MV_Schw | A | 10752 | 16  | 0 |                    | 1 |
| MV_Schw | G | 10753 | 207 | 2 | 0.734151152837751  |   |
| MV_Schw | C | 10754 | 233 | 5 |                    | 1 |
| MV_Schw | T | 10755 | 25  | 0 |                    | 1 |
| MV_Schw | T | 10756 | 14  | 0 |                    | 1 |
| MV_Schw | T | 10757 | 10  | 0 |                    | 1 |
| MV_Schw | G | 10758 | 172 | 0 | 0.0854265304031386 |   |
| MV_Schw | A | 10759 | 10  | 0 |                    | 1 |
| MV_Schw | C | 10760 | 81  | 0 | 0.641186461810141  |   |
| MV_Schw | C | 10761 | 19  | 0 |                    | 1 |
| MV_Schw | C | 10762 | 16  | 1 | 0.950262622850522  |   |

|         |   |       |     |   |                    |   |
|---------|---|-------|-----|---|--------------------|---|
| MV_Schw | A | 10763 | 25  | 0 |                    | 1 |
| MV_Schw | T | 10764 | 16  | 0 |                    | 1 |
| MV_Schw | A | 10765 | 37  | 0 |                    | 1 |
| MV_Schw | T | 10766 | 25  | 0 |                    | 1 |
| MV_Schw | G | 10767 | 10  | 0 |                    | 1 |
| MV_Schw | A | 10768 | 10  | 0 |                    | 1 |
| MV_Schw | T | 10769 | 17  | 0 |                    | 1 |
| MV_Schw | G | 10770 | 143 | 1 | 0.88950624150852   |   |
| MV_Schw | T | 10771 | 171 | 0 | 0.0850400511116103 |   |
| MV_Schw | G | 10772 | 52  | 0 | 0.950262622850522  |   |
| MV_Schw | A | 10773 | 19  | 1 |                    | 1 |
| MV_Schw | T | 10774 | 52  | 1 |                    | 1 |
| MV_Schw | A | 10775 | 33  | 1 |                    | 1 |
| MV_Schw | A | 10776 | 2   | 1 | 0.491835918445353  |   |
| MV_Schw | T | 10777 | 19  | 0 |                    | 1 |
| MV_Schw | G | 10778 | 66  | 0 | 0.789229943133706  |   |
| MV_Schw | T | 10779 | 4   | 0 |                    | 1 |
| MV_Schw | A | 10780 | 12  | 0 |                    | 1 |
| MV_Schw | T | 10781 | 8   | 1 | 0.789229943133706  |   |
| MV_Schw | G | 10782 | 60  | 0 | 0.957721317456694  |   |
| MV_Schw | T | 10783 | 17  | 0 |                    | 1 |
| MV_Schw | T | 10784 | 76  | 0 | 0.638894311640422  |   |
| MV_Schw | G | 10785 | 19  | 0 |                    | 1 |
| MV_Schw | T | 10786 | 10  | 1 | 0.822598489333375  |   |
| MV_Schw | A | 10787 | 12  | 0 |                    | 1 |
| MV_Schw | A | 10788 | 43  | 0 |                    | 1 |
| MV_Schw | G | 10789 | 122 | 1 | 0.791667533131283  |   |
| MV_Schw | T | 10790 | 19  | 0 |                    | 1 |
| MV_Schw | G | 10791 | 54  | 1 |                    | 1 |
| MV_Schw | G | 10792 | 43  | 1 | 0.950262622850522  |   |
| MV_Schw | A | 10793 | 76  | 2 |                    | 1 |
| MV_Schw | G | 10794 | 68  | 1 |                    | 1 |
| MV_Schw | C | 10795 | 163 | 3 |                    | 1 |
| MV_Schw | T | 10796 | 2   | 0 |                    | 1 |
| MV_Schw | T | 10797 | 19  | 0 |                    | 1 |
| MV_Schw | A | 10798 | 4   | 0 |                    | 1 |

|         |    |       |     |   |                    |
|---------|----|-------|-----|---|--------------------|
| MV_Schw | C  | 10799 | 246 | 1 | 0.0924930199887263 |
| MV_Schw | C  | 10800 | 54  | 0 | 0.950262622850522  |
| MV_Schw | T  | 10801 | 35  | 0 | 1                  |
| MV_Schw | C  | 10802 | 107 | 1 | 0.945767847051808  |
| MV_Schw | C  | 10803 | 54  | 0 | 0.950262622850522  |
| MV_Schw | A  | 10804 | 126 | 1 | 0.658415249679101  |
| MV_Schw | T  | 10805 | 33  | 0 | 1                  |
| MV_Schw | G  | 10806 | 66  | 0 | 0.789229943133706  |
| MV_Schw | A  | 10807 | 2   | 0 | 1                  |
| MV_Schw | C  | 10808 | 39  | 0 | 1                  |
| MV_Schw | C  | 10809 | 95  | 0 | 0.499662168427985  |
| MV_Schw | C  | 10810 | 145 | 1 | 0.544375066438321  |
| MV_Schw | T  | 10811 | 21  | 0 | 1                  |
| MV_Schw | G  | 10812 | 41  | 1 | 1                  |
| MV_Schw | A  | 10813 | 35  | 0 | 1                  |
| MV_Schw | G  | 10814 | 283 | 3 | 0.603170726217094  |
| MV_Schw | NA | 10815 | 0   | 0 | NA                 |
| MV_Schw | T  | 10816 | 10  | 0 | 1                  |
| MV_Schw | C  | 10817 | 16  | 0 | 1                  |
| MV_Schw | A  | 10818 | 12  | 1 | 0.88950624150852   |
| MV_Schw | A  | 10819 | 41  | 0 | 1                  |
| MV_Schw | C  | 10820 | 343 | 7 | 1                  |
| MV_Schw | C  | 10821 | 41  | 0 | 1                  |
| MV_Schw | NA | 10822 | 0   | 0 | NA                 |
| MV_Schw | G  | 10823 | 19  | 1 | 1                  |
| MV_Schw | T  | 10824 | 10  | 0 | 1                  |
| MV_Schw | C  | 10825 | 238 | 3 | 1                  |
| MV_Schw | T  | 10826 | 10  | 0 | 1                  |
| MV_Schw | T  | 10827 | 14  | 1 | 0.944879389258477  |
| MV_Schw | A  | 10828 | 2   | 0 | 1                  |
| MV_Schw | C  | 10829 | 21  | 0 | 1                  |
| MV_Schw | A  | 10830 | 6   | 0 | 1                  |
| MV_Schw | G  | 10831 | 33  | 1 | 1                  |
| MV_Schw | C  | 10832 | 10  | 0 | 1                  |
| MV_Schw | C  | 10833 | 14  | 0 | 1                  |
| MV_Schw | T  | 10834 | 27  | 1 | 1                  |

|         |    |       |     |   |                   |
|---------|----|-------|-----|---|-------------------|
| MV_Schw | G  | 10835 | 31  | 1 | 0.791667533131283 |
| MV_Schw | A  | 10836 | 56  | 1 | 1                 |
| MV_Schw | A  | 10837 | 33  | 0 | 1                 |
| MV_Schw | A  | 10838 | 23  | 1 | 1                 |
| MV_Schw | G  | 10839 | 85  | 3 | 0.691829352390927 |
| MV_Schw | A  | 10840 | 4   | 0 | 1                 |
| MV_Schw | A  | 10841 | 12  | 0 | 1                 |
| MV_Schw | A  | 10842 | 35  | 1 | 1                 |
| MV_Schw | A  | 10843 | 62  | 0 | 0.789229943133706 |
| MV_Schw | G  | 10844 | 107 | 1 | 0.945767847051808 |
| MV_Schw | G  | 10845 | 4   | 0 | 1                 |
| MV_Schw | A  | 10846 | 10  | 0 | 1                 |
| MV_Schw | G  | 10847 | 66  | 0 | 0.789229943133706 |
| MV_Schw | A  | 10848 | 12  | 0 | 1                 |
| MV_Schw | T  | 10849 | 14  | 0 | 1                 |
| MV_Schw | C  | 10850 | 37  | 1 | 1                 |
| MV_Schw | A  | 10851 | 33  | 0 | 1                 |
| MV_Schw | A  | 10852 | 12  | 0 | 1                 |
| MV_Schw | G  | 10853 | 62  | 1 | 1                 |
| MV_Schw | G  | 10854 | 277 | 3 | 0.598480293360952 |
| MV_Schw | A  | 10855 | 25  | 0 | 1                 |
| MV_Schw | A  | 10856 | 47  | 0 | 1                 |
| MV_Schw | NA | 10857 | 0   | 0 | NA                |
| MV_Schw | C  | 10858 | 147 | 3 | 1                 |
| MV_Schw | A  | 10859 | 2   | 1 | 0.491835918445353 |
| MV_Schw | G  | 10860 | 14  | 0 | 1                 |
| MV_Schw | G  | 10861 | 70  | 1 | 1                 |
| MV_Schw | T  | 10862 | 31  | 1 | 1                 |
| MV_Schw | A  | 10863 | 43  | 0 | 1                 |
| MV_Schw | G  | 10864 | 31  | 1 | 1                 |
| MV_Schw | A  | 10865 | 8   | 0 | 1                 |
| MV_Schw | C  | 10866 | 143 | 3 | 1                 |
| MV_Schw | T  | 10867 | 39  | 0 | 1                 |
| MV_Schw | T  | 10868 | 95  | 1 | 1                 |
| MV_Schw | T  | 10869 | 6   | 0 | 1                 |
| MV_Schw | T  | 10870 | 6   | 0 | 1                 |

|         |    |       |     |   |                   |    |
|---------|----|-------|-----|---|-------------------|----|
| MV_Schw | T  | 10871 | 21  | 0 |                   | 1  |
| MV_Schw | G  | 10872 | 132 | 0 | 0.222002676269896 |    |
| MV_Schw | C  | 10873 | 27  | 0 |                   | 1  |
| MV_Schw | NA | 10874 | 0   | 0 |                   | NA |
| MV_Schw | A  | 10875 | 8   | 0 |                   | 1  |
| MV_Schw | A  | 10876 | 16  | 0 |                   | 1  |
| MV_Schw | A  | 10877 | 25  | 0 |                   | 1  |
| MV_Schw | A  | 10878 | 33  | 2 | 0.463720798159947 |    |
| MV_Schw | T  | 10879 | 54  | 2 | 0.789229943133706 |    |
| MV_Schw | G  | 10880 | 29  | 0 |                   | 1  |
| MV_Schw | NA | 10881 | 0   | 0 |                   | NA |
| MV_Schw | C  | 10882 | 47  | 0 |                   | 1  |
| MV_Schw | T  | 10883 | 17  | 0 |                   | 1  |
| MV_Schw | T  | 10884 | 31  | 1 |                   | 1  |
| MV_Schw | A  | 10885 | 37  | 0 |                   | 1  |
| MV_Schw | C  | 10886 | 58  | 1 |                   | 1  |
| MV_Schw | A  | 10887 | 72  | 1 |                   | 1  |
| MV_Schw | A  | 10888 | 33  | 1 | 0.822598489333375 |    |
| MV_Schw | A  | 10889 | 17  | 0 |                   | 1  |
| MV_Schw | A  | 10890 | 19  | 0 |                   | 1  |
| MV_Schw | T  | 10891 | 165 | 0 | 0.121895614141351 |    |
| MV_Schw | G  | 10892 | 29  | 1 |                   | 1  |
| MV_Schw | A  | 10893 | 60  | 1 |                   | 1  |
| MV_Schw | G  | 10894 | 194 | 1 | 0.288870964410068 |    |
| MV_Schw | G  | 10895 | 153 | 2 |                   | 1  |
| MV_Schw | G  | 10896 | 41  | 1 |                   | 1  |
| MV_Schw | C  | 10897 | 17  | 0 |                   | 1  |
| MV_Schw | A  | 10898 | 17  | 0 |                   | 1  |
| MV_Schw | T  | 10899 | 136 | 1 | 0.667619064364632 |    |
| MV_Schw | G  | 10900 | 143 | 0 | 0.161503851613234 |    |
| MV_Schw | C  | 10901 | 37  | 0 |                   | 1  |
| MV_Schw | C  | 10902 | 101 | 1 |                   | 1  |
| MV_Schw | A  | 10903 | 50  | 0 | 0.950262622850522 |    |
| MV_Schw | A  | 10904 | 43  | 0 |                   | 1  |
| MV_Schw | G  | 10905 | 132 | 2 |                   | 1  |
| MV_Schw | T  | 10906 | 93  | 0 | 0.498091317793217 |    |



|         |   |       |     |   |                     |   |
|---------|---|-------|-----|---|---------------------|---|
| MV_Schw | G | 10907 | 132 | 1 | 0.659520109379356   |   |
| MV_Schw | A | 10908 | 14  | 0 |                     | 1 |
| MV_Schw | T | 10909 | 14  | 0 |                     | 1 |
| MV_Schw | T | 10910 | 10  | 0 |                     | 1 |
| MV_Schw | G | 10911 | 41  | 0 |                     | 1 |
| MV_Schw | C | 10912 | 56  | 1 |                     | 1 |
| MV_Schw | T | 10913 | 331 | 1 | 0.00989925601088655 |   |
| MV_Schw | G | 10914 | 128 | 2 |                     | 1 |
| MV_Schw | A | 10915 | 27  | 0 |                     | 1 |
| MV_Schw | A | 10916 | 8   | 0 |                     | 1 |
| MV_Schw | A | 10917 | 10  | 0 |                     | 1 |
| MV_Schw | A | 10918 | 17  | 0 |                     | 1 |
| MV_Schw | T | 10919 | 35  | 0 |                     | 1 |
| MV_Schw | C | 10920 | 66  | 0 | 0.789229943133706   |   |
| MV_Schw | T | 10921 | 8   | 0 |                     | 1 |
| MV_Schw | A | 10922 | 25  | 0 |                     | 1 |
| MV_Schw | A | 10923 | 12  | 0 |                     | 1 |
| MV_Schw | T | 10924 | 14  | 0 |                     | 1 |
| MV_Schw | C | 10925 | 50  | 1 |                     | 1 |
| MV_Schw | T | 10926 | 2   | 0 |                     | 1 |
| MV_Schw | C | 10927 | 2   | 0 |                     | 1 |
| MV_Schw | A | 10928 | 27  | 0 |                     | 1 |
| MV_Schw | A | 10929 | 79  | 1 |                     | 1 |
| MV_Schw | A | 10930 | 70  | 0 | 0.789229943133706   |   |
| MV_Schw | C | 10931 | 128 | 1 | 0.658415249679101   |   |
| MV_Schw | G | 10932 | 25  | 0 |                     | 1 |
| MV_Schw | G | 10933 | 41  | 1 |                     | 1 |
| MV_Schw | G | 10934 | 76  | 0 | 0.638894311640422   |   |
| MV_Schw | A | 10935 | 62  | 1 |                     | 1 |
| MV_Schw | T | 10936 | 39  | 0 |                     | 1 |
| MV_Schw | T | 10937 | 10  | 0 |                     | 1 |
| MV_Schw | G | 10938 | 269 | 4 |                     | 1 |
| MV_Schw | G | 10939 | 39  | 0 |                     | 1 |
| MV_Schw | C | 10940 | 269 | 2 | 0.35554222034638    |   |
| MV_Schw | A | 10941 | 105 | 2 |                     | 1 |
| MV_Schw | A | 10942 | 41  | 0 |                     | 1 |

|         |    |       |      |   |                      |    |
|---------|----|-------|------|---|----------------------|----|
| MV_Schw | A  | 10943 | 21   | 0 |                      | 1  |
| MV_Schw | T  | 10944 | 17   | 0 |                      | 1  |
| MV_Schw | A  | 10945 | 118  | 0 | 0.296802961873227    |    |
| MV_Schw | T  | 10946 | 21   | 0 |                      | 1  |
| MV_Schw | T  | 10947 | 87   | 0 | 0.653463094391213    |    |
| MV_Schw | T  | 10948 | 14   | 0 |                      | 1  |
| MV_Schw | T  | 10949 | 124  | 0 | 0.301343438464672    |    |
| MV_Schw | A  | 10950 | 10   | 0 |                      | 1  |
| MV_Schw | A  | 10951 | 19   | 1 |                      | 1  |
| MV_Schw | G  | 10952 | 285  | 3 | 0.606464429862209    |    |
| MV_Schw | G  | 10953 | 31   | 0 |                      | 1  |
| MV_Schw | NA | 10954 | 0    | 0 |                      | NA |
| MV_Schw | C  | 10955 | 17   | 0 |                      | 1  |
| MV_Schw | A  | 10956 | 27   | 0 |                      | 1  |
| MV_Schw | A  | 10957 | 16   | 1 | 0.950262622850522    |    |
| MV_Schw | T  | 10958 | 25   | 0 |                      | 1  |
| MV_Schw | G  | 10959 | 105  | 1 | 0.944944073306986    |    |
| MV_Schw | G  | 10960 | 41   | 0 |                      | 1  |
| MV_Schw | G  | 10961 | 39   | 1 |                      | 1  |
| MV_Schw | A  | 10962 | 10   | 1 | 0.822598489333375    |    |
| MV_Schw | T  | 10963 | 35   | 0 |                      | 1  |
| MV_Schw | G  | 10964 | 25   | 0 |                      | 1  |
| MV_Schw | G  | 10965 | 70   | 3 | 0.819327818667335    |    |
| MV_Schw | C  | 10966 | 316  | 1 | 0.060993248324147    |    |
| MV_Schw | C  | 10967 | 676  | 6 | 0.071237197691116    |    |
| MV_Schw | A  | 10968 | 35   | 0 |                      | 1  |
| MV_Schw | A  | 10969 | 41   | 0 |                      | 1  |
| MV_Schw | G  | 10970 | 328  | 3 | 0.353023575911474    |    |
| MV_Schw | G  | 10971 | 79   | 1 |                      | 1  |
| MV_Schw | A  | 10972 | 52   | 0 | 0.950262622850522    |    |
| MV_Schw | T  | 10973 | 19   | 0 |                      | 1  |
| MV_Schw | G  | 10974 | 87   | 0 | 0.653463094391213    |    |
| MV_Schw | A  | 10975 | 33   | 1 |                      | 1  |
| MV_Schw | G  | 10976 | 541  | 4 | 0.0603533834492057   |    |
| MV_Schw | C  | 10977 | 1070 | 5 | 3.38666241586753e-06 |    |
| MV_Schw | A  | 10978 | 39   | 1 | 0.9314909603024      |    |

|         |    |       |     |   |                    |    |
|---------|----|-------|-----|---|--------------------|----|
| MV_Schw | C  | 10979 | 19  | 0 |                    | 1  |
| MV_Schw | G  | 10980 | 72  | 1 |                    | 1  |
| MV_Schw | A  | 10981 | 89  | 0 | 0.497615650989996  |    |
| MV_Schw | T  | 10982 | 79  | 1 |                    | 1  |
| MV_Schw | T  | 10983 | 17  | 0 |                    | 1  |
| MV_Schw | T  | 10984 | 14  | 0 |                    | 1  |
| MV_Schw | G  | 10985 | 29  | 0 |                    | 1  |
| MV_Schw | A  | 10986 | 6   | 0 |                    | 1  |
| MV_Schw | C  | 10987 | 366 | 1 | 0.0262336052191225 |    |
| MV_Schw | T  | 10988 | 8   | 0 |                    | 1  |
| MV_Schw | A  | 10989 | 29  | 1 |                    | 1  |
| MV_Schw | A  | 10990 | 99  | 1 |                    | 1  |
| MV_Schw | G  | 10991 | 99  | 2 |                    | 1  |
| MV_Schw | G  | 10992 | 136 | 1 | 0.667619064364632  |    |
| MV_Schw | C  | 10993 | 99  | 1 | 0.944879389258477  |    |
| MV_Schw | A  | 10994 | 14  | 0 |                    | 1  |
| MV_Schw | C  | 10995 | 64  | 3 | 0.609091736782917  |    |
| MV_Schw | T  | 10996 | 39  | 0 |                    | 1  |
| MV_Schw | C  | 10997 | 329 | 1 | 0.0146738363101635 |    |
| MV_Schw | C  | 10998 | 105 | 1 | 0.944944073306986  |    |
| MV_Schw | A  | 10999 | 6   | 0 |                    | 1  |
| MV_Schw | C  | 11000 | 72  | 2 |                    | 1  |
| MV_Schw | A  | 11001 | 39  | 0 |                    | 1  |
| MV_Schw | C  | 11002 | 79  | 0 | 0.639207655977387  |    |
| MV_Schw | T  | 11003 | 47  | 0 |                    | 1  |
| MV_Schw | C  | 11004 | 16  | 0 |                    | 1  |
| MV_Schw | T  | 11005 | 58  | 0 | 0.953489044526869  |    |
| MV_Schw | A  | 11006 | 25  | 0 |                    | 1  |
| MV_Schw | G  | 11007 | 136 | 1 | 0.983041048229953  |    |
| MV_Schw | C  | 11008 | 91  | 1 |                    | 1  |
| MV_Schw | T  | 11009 | 19  | 0 |                    | 1  |
| MV_Schw | G  | 11010 | 105 | 1 | 0.944944073306986  |    |
| MV_Schw | NA | 11011 | 0   | 0 |                    | NA |
| MV_Schw | C  | 11012 | 339 | 1 | 0.0469760201915419 |    |
| MV_Schw | T  | 11013 | 21  | 0 |                    | 1  |
| MV_Schw | C  | 11014 | 262 | 3 | 0.682748760038921  |    |

|         |    |       |     |   |                    |
|---------|----|-------|-----|---|--------------------|
| MV_Schw | A  | 11015 | 56  | 0 | 0.950262622850522  |
| MV_Schw | G  | 11016 | 341 | 1 | 0.047574147684283  |
| MV_Schw | G  | 11017 | 205 | 0 | 0.0461495798537483 |
| MV_Schw | A  | 11018 | 39  | 0 | 1                  |
| MV_Schw | G  | 11019 | 33  | 1 | 0.822598489333375  |
| MV_Schw | NA | 11020 | 0   | 0 | NA                 |
| MV_Schw | C  | 11021 | 12  | 0 | 1                  |
| MV_Schw | C  | 11022 | 124 | 0 | 0.301343438464672  |
| MV_Schw | C  | 11023 | 29  | 0 | 1                  |
| MV_Schw | C  | 11024 | 266 | 1 | 0.182730995624231  |
| MV_Schw | A  | 11025 | 87  | 1 | 1                  |
| MV_Schw | A  | 11026 | 48  | 0 | 0.950262622850522  |
| MV_Schw | A  | 11027 | 54  | 0 | 0.950262622850522  |
| MV_Schw | G  | 11028 | 35  | 0 | 1                  |
| MV_Schw | A  | 11029 | 12  | 0 | 1                  |
| MV_Schw | T  | 11030 | 6   | 0 | 1                  |
| MV_Schw | C  | 11031 | 58  | 1 | 1                  |
| MV_Schw | T  | 11032 | 6   | 0 | 1                  |
| MV_Schw | C  | 11033 | 93  | 1 | 1                  |
| MV_Schw | A  | 11034 | 78  | 1 | 1                  |
| MV_Schw | A  | 11035 | 91  | 0 | 0.497615650989996  |
| MV_Schw | A  | 11036 | 33  | 0 | 1                  |
| MV_Schw | G  | 11037 | 155 | 0 | 0.118807954027477  |
| MV_Schw | A  | 11038 | 6   | 0 | 1                  |
| MV_Schw | A  | 11039 | 8   | 0 | 1                  |
| MV_Schw | A  | 11040 | 16  | 0 | 1                  |
| MV_Schw | G  | 11041 | 353 | 2 | 0.089478331324259  |
| MV_Schw | T  | 11042 | 12  | 0 | 1                  |
| MV_Schw | C  | 11043 | 74  | 1 | 1                  |
| MV_Schw | A  | 11044 | 99  | 1 | 1                  |
| MV_Schw | C  | 11045 | 386 | 1 | 0.0138245907553782 |
| MV_Schw | A  | 11046 | 72  | 0 | 0.791667533131283  |
| MV_Schw | G  | 11047 | 50  | 1 | 1                  |
| MV_Schw | G  | 11048 | 110 | 5 | 0.44055837109039   |
| MV_Schw | G  | 11049 | 29  | 0 | 1                  |
| MV_Schw | G  | 11050 | 93  | 1 | 1                  |

|         |   |       |     |   |                    |   |
|---------|---|-------|-----|---|--------------------|---|
| MV_Schw | G | 11051 | 66  | 0 | 0.789229943133706  |   |
| MV_Schw | G | 11052 | 27  | 0 |                    | 1 |
| MV_Schw | G | 11053 | 223 | 4 |                    | 1 |
| MV_Schw | G | 11054 | 481 | 6 | 0.644470496730524  |   |
| MV_Schw | C | 11055 | 271 | 1 | 0.0497714824581606 |   |
| MV_Schw | C | 11056 | 155 | 2 |                    | 1 |
| MV_Schw | A | 11057 | 39  | 0 |                    | 1 |
| MV_Schw | G | 11058 | 93  | 1 |                    | 1 |
| MV_Schw | T | 11059 | 6   | 0 |                    | 1 |
| MV_Schw | C | 11060 | 52  | 1 |                    | 1 |
| MV_Schw | T | 11061 | 72  | 0 | 0.791667533131283  |   |
| MV_Schw | T | 11062 | 353 | 6 |                    | 1 |
| MV_Schw | A | 11063 | 79  | 0 | 0.639207655977387  |   |
| MV_Schw | A | 11064 | 87  | 1 |                    | 1 |
| MV_Schw | A | 11065 | 45  | 1 |                    | 1 |
| MV_Schw | A | 11066 | 66  | 2 |                    | 1 |
| MV_Schw | A | 11067 | 27  | 1 |                    | 1 |
| MV_Schw | C | 11068 | 64  | 0 | 0.789229943133706  |   |
| MV_Schw | C | 11069 | 120 | 1 |                    | 1 |
| MV_Schw | T | 11070 | 6   | 0 |                    | 1 |
| MV_Schw | A | 11071 | 17  | 1 | 0.528591092326266  |   |
| MV_Schw | C | 11072 | 54  | 1 |                    | 1 |
| MV_Schw | T | 11073 | 8   | 0 |                    | 1 |
| MV_Schw | C | 11074 | 39  | 0 |                    | 1 |
| MV_Schw | C | 11075 | 122 | 0 | 0.298485329352986  |   |
| MV_Schw | C | 11076 | 50  | 0 | 0.950262622850522  |   |
| MV_Schw | G | 11077 | 246 | 4 |                    | 1 |
| MV_Schw | A | 11078 | 116 | 2 |                    | 1 |
| MV_Schw | A | 11079 | 79  | 2 |                    | 1 |
| MV_Schw | G | 11080 | 74  | 3 | 0.44280652126772   |   |
| MV_Schw | C | 11081 | 14  | 1 | 0.944879389258477  |   |
| MV_Schw | C | 11082 | 50  | 1 |                    | 1 |
| MV_Schw | C | 11083 | 2   | 0 |                    | 1 |
| MV_Schw | A | 11084 | 31  | 2 | 0.428411386231373  |   |
| MV_Schw | G | 11085 | 126 | 2 |                    | 1 |
| MV_Schw | T | 11086 | 16  | 0 |                    | 1 |

|         |   |       |     |   |                   |
|---------|---|-------|-----|---|-------------------|
| MV_Schw | C | 11087 | 17  | 1 | 0.983041048229953 |
| MV_Schw | C | 11088 | 89  | 1 | 1                 |
| MV_Schw | A | 11089 | 4   | 0 | 1                 |
| MV_Schw | C | 11090 | 79  | 1 | 1                 |
| MV_Schw | A | 11091 | 33  | 1 | 0.822598489333375 |
| MV_Schw | C | 11092 | 39  | 1 | 1                 |
| MV_Schw | A | 11093 | 8   | 0 | 1                 |
| MV_Schw | A | 11094 | 2   | 0 | 1                 |
| MV_Schw | G | 11095 | 112 | 0 | 0.390108970321283 |
| MV_Schw | T | 11096 | 6   | 1 | 0.704667204683568 |
| MV_Schw | A | 11097 | 12  | 0 | 1                 |
| MV_Schw | C | 11098 | 47  | 1 | 1                 |
| MV_Schw | C | 11099 | 141 | 1 | 0.989441011726102 |
| MV_Schw | A | 11100 | 37  | 0 | 1                 |
| MV_Schw | G | 11101 | 91  | 0 | 0.497615650989996 |
| MV_Schw | G | 11102 | 62  | 0 | 0.789229943133706 |
| MV_Schw | A | 11103 | 17  | 1 | 0.983041048229953 |
| MV_Schw | A | 11104 | 4   | 0 | 1                 |
| MV_Schw | C | 11105 | 56  | 0 | 0.950262622850522 |
| MV_Schw | G | 11106 | 76  | 0 | 0.638894311640422 |
| MV_Schw | T | 11107 | 23  | 0 | 1                 |
| MV_Schw | G | 11108 | 116 | 1 | 0.789229943133706 |
| MV_Schw | A | 11109 | 48  | 1 | 1                 |
| MV_Schw | G | 11110 | 122 | 1 | 0.791667533131283 |
| MV_Schw | A | 11111 | 60  | 0 | 0.957721317456694 |
| MV_Schw | G | 11112 | 105 | 2 | 1                 |
| MV_Schw | C | 11113 | 54  | 0 | 0.950262622850522 |
| MV_Schw | A | 11114 | 35  | 0 | 1                 |
| MV_Schw | G | 11115 | 130 | 1 | 0.658415249679101 |
| MV_Schw | C | 11116 | 126 | 1 | 0.658415249679101 |
| MV_Schw | A | 11117 | 91  | 1 | 1                 |
| MV_Schw | A | 11118 | 62  | 1 | 1                 |
| MV_Schw | A | 11119 | 33  | 1 | 1                 |
| MV_Schw | A | 11120 | 140 | 0 | 0.230921379149447 |
| MV_Schw | G | 11121 | 64  | 0 | 0.789229943133706 |
| MV_Schw | G | 11122 | 200 | 1 | 0.549697051814019 |

|         |    |       |     |   |                    |
|---------|----|-------|-----|---|--------------------|
| MV_Schw | G  | 11123 | 186 | 1 | 0.655978174231774  |
| MV_Schw | T  | 11124 | 8   | 0 | 1                  |
| MV_Schw | T  | 11125 | 27  | 1 | 1                  |
| MV_Schw | T  | 11126 | 101 | 1 | 0.944879389258477  |
| MV_Schw | A  | 11127 | 54  | 0 | 0.950262622850522  |
| MV_Schw | T  | 11128 | 62  | 0 | 0.789229943133706  |
| MV_Schw | A  | 11129 | 56  | 1 | 1                  |
| MV_Schw | G  | 11130 | 62  | 1 | 1                  |
| MV_Schw | G  | 11131 | 87  | 3 | 0.704667204683568  |
| MV_Schw | G  | 11132 | 364 | 2 | 0.0919716715734722 |
| MV_Schw | T  | 11133 | 12  | 2 | 0.0975104748468945 |
| MV_Schw | NA | 11134 | 0   | 0 | NA                 |
| MV_Schw | C  | 11135 | 72  | 0 | 0.791667533131283  |
| MV_Schw | C  | 11136 | 70  | 1 | 1                  |
| MV_Schw | C  | 11137 | 153 | 1 | 0.436311974989592  |
| MV_Schw | T  | 11138 | 33  | 0 | 1                  |
| MV_Schw | C  | 11139 | 87  | 0 | 0.653463094391213  |
| MV_Schw | A  | 11140 | 58  | 1 | 1                  |
| MV_Schw | A  | 11141 | 39  | 1 | 1                  |
| MV_Schw | G  | 11142 | 178 | 4 | 1                  |
| MV_Schw | T  | 11143 | 14  | 0 | 1                  |
| MV_Schw | A  | 11144 | 27  | 0 | 1                  |
| MV_Schw | A  | 11145 | 39  | 2 | 0.560243889454362  |
| MV_Schw | T  | 11146 | 76  | 1 | 1                  |
| MV_Schw | T  | 11147 | 43  | 1 | 0.950262622850522  |
| MV_Schw | C  | 11148 | 118 | 2 | 1                  |
| MV_Schw | G  | 11149 | 165 | 0 | 0.121895614141351  |
| MV_Schw | G  | 11150 | 178 | 6 | 0.66454830422033   |
| MV_Schw | C  | 11151 | 225 | 3 | 0.96855857297699   |
| MV_Schw | A  | 11152 | 33  | 1 | 0.822598489333375  |
| MV_Schw | G  | 11153 | 48  | 1 | 1                  |
| MV_Schw | G  | 11154 | 62  | 3 | 0.57780206681461   |
| MV_Schw | A  | 11155 | 6   | 0 | 1                  |
| MV_Schw | C  | 11156 | 229 | 2 | 0.632968068765344  |
| MV_Schw | C  | 11157 | 118 | 1 | 1                  |
| MV_Schw | A  | 11158 | 138 | 3 | 1                  |

|         |   |       |     |   |                    |   |
|---------|---|-------|-----|---|--------------------|---|
| MV_Schw | A | 11159 | 70  | 1 |                    | 1 |
| MV_Schw | G | 11160 | 172 | 4 |                    | 1 |
| MV_Schw | A | 11161 | 31  | 0 |                    | 1 |
| MV_Schw | C | 11162 | 227 | 3 |                    | 1 |
| MV_Schw | A | 11163 | 25  | 1 |                    | 1 |
| MV_Schw | C | 11164 | 81  | 3 | 0.88950624150852   |   |
| MV_Schw | T | 11165 | 128 | 1 | 0.658415249679101  |   |
| MV_Schw | G | 11166 | 48  | 0 | 0.950262622850522  |   |
| MV_Schw | A | 11167 | 97  | 3 |                    | 1 |
| MV_Schw | T | 11168 | 41  | 1 |                    | 1 |
| MV_Schw | C | 11169 | 101 | 1 | 0.944879389258477  |   |
| MV_Schw | A | 11170 | 81  | 1 |                    | 1 |
| MV_Schw | T | 11171 | 31  | 1 |                    | 1 |
| MV_Schw | C | 11172 | 180 | 2 | 0.945848991671798  |   |
| MV_Schw | C | 11173 | 370 | 1 | 0.0188268016494874 |   |
| MV_Schw | G | 11174 | 351 | 3 | 0.239137755983385  |   |
| MV_Schw | G | 11175 | 145 | 1 | 0.88950624150852   |   |
| MV_Schw | A | 11176 | 161 | 3 |                    | 1 |
| MV_Schw | G | 11177 | 258 | 3 | 0.681308121427830  |   |
| MV_Schw | A | 11178 | 10  | 0 |                    | 1 |
| MV_Schw | A | 11179 | 8   | 1 | 0.789229943133706  |   |
| MV_Schw | T | 11180 | 29  | 0 |                    | 1 |
| MV_Schw | A | 11181 | 103 | 0 | 0.37877131423274   |   |
| MV_Schw | T | 11182 | 188 | 1 | 0.542247232322076  |   |
| MV_Schw | G | 11183 | 172 | 3 |                    | 1 |
| MV_Schw | G | 11184 | 172 | 1 | 0.789229943133706  |   |
| MV_Schw | A | 11185 | 62  | 1 |                    | 1 |
| MV_Schw | A | 11186 | 68  | 0 | 0.789229943133706  |   |
| MV_Schw | G | 11187 | 213 | 2 | 0.73548636006501   |   |
| MV_Schw | C | 11188 | 60  | 1 |                    | 1 |
| MV_Schw | T | 11189 | 87  | 1 |                    | 1 |
| MV_Schw | T | 11190 | 48  | 1 |                    | 1 |
| MV_Schw | A | 11191 | 134 | 1 | 0.983041048229953  |   |
| MV_Schw | C | 11192 | 182 | 1 | 0.65158773158174   |   |
| MV_Schw | G | 11193 | 209 | 1 | 0.161035028661221  |   |
| MV_Schw | A | 11194 | 47  | 0 |                    | 1 |



|         |   |       |     |   |                   |
|---------|---|-------|-----|---|-------------------|
| MV_Schw | G | 11195 | 161 | 1 | 0.440157375549872 |
| MV_Schw | A | 11196 | 6   | 0 | 1                 |
| MV_Schw | C | 11197 | 39  | 1 | 0.9314909603024   |
| MV_Schw | A | 11198 | 95  | 0 | 0.499662168427985 |
| MV_Schw | G | 11199 | 109 | 1 | 1                 |
| MV_Schw | T | 11200 | 12  | 0 | 1                 |
| MV_Schw | C | 11201 | 10  | 0 | 1                 |
| MV_Schw | A | 11202 | 109 | 1 | 0.947544583923452 |
| MV_Schw | G | 11203 | 62  | 0 | 0.789229943133706 |
| MV_Schw | T | 11204 | 52  | 0 | 0.950262622850522 |
| MV_Schw | G | 11205 | 52  | 1 | 1                 |
| MV_Schw | C | 11206 | 39  | 0 | 1                 |
| MV_Schw | A | 11207 | 21  | 0 | 1                 |
| MV_Schw | T | 11208 | 17  | 1 | 0.983041048229953 |
| MV_Schw | T | 11209 | 17  | 0 | 1                 |
| MV_Schw | T | 11210 | 23  | 0 | 1                 |
| MV_Schw | A | 11211 | 29  | 0 | 1                 |
| MV_Schw | T | 11212 | 19  | 1 | 1                 |
| MV_Schw | C | 11213 | 114 | 0 | 0.395791012435089 |
| MV_Schw | A | 11214 | 4   | 0 | 1                 |
| MV_Schw | C | 11215 | 66  | 0 | 0.789229943133706 |
| MV_Schw | G | 11216 | 33  | 0 | 1                 |
| MV_Schw | A | 11217 | 17  | 0 | 1                 |
| MV_Schw | C | 11218 | 184 | 0 | 0.060993248324147 |
| MV_Schw | T | 11219 | 14  | 0 | 1                 |
| MV_Schw | G | 11220 | 23  | 0 | 1                 |
| MV_Schw | A | 11221 | 17  | 0 | 1                 |
| MV_Schw | T | 11222 | 16  | 1 | 0.483965165529824 |
| MV_Schw | C | 11223 | 81  | 0 | 0.641186461810141 |
| MV_Schw | T | 11224 | 29  | 0 | 1                 |
| MV_Schw | C | 11225 | 79  | 1 | 1                 |
| MV_Schw | A | 11226 | 47  | 1 | 1                 |
| MV_Schw | A | 11227 | 91  | 1 | 1                 |
| MV_Schw | G | 11228 | 161 | 1 | 0.78470776546672  |
| MV_Schw | A | 11229 | 23  | 1 | 1                 |
| MV_Schw | A | 11230 | 4   | 0 | 1                 |

|         |   |       |     |   |                     |   |
|---------|---|-------|-----|---|---------------------|---|
| MV_Schw | G | 11231 | 74  | 1 |                     | 1 |
| MV_Schw | T | 11232 | 33  | 1 |                     | 1 |
| MV_Schw | A | 11233 | 52  | 1 |                     | 1 |
| MV_Schw | C | 11234 | 74  | 0 | 0.795198078226602   |   |
| MV_Schw | T | 11235 | 45  | 0 |                     | 1 |
| MV_Schw | G | 11236 | 41  | 0 |                     | 1 |
| MV_Schw | C | 11237 | 192 | 2 | 0.822598489333375   |   |
| MV_Schw | C | 11238 | 638 | 2 | 0.00020145550607251 |   |
| MV_Schw | T | 11239 | 48  | 0 | 0.950262622850522   |   |
| MV_Schw | T | 11240 | 27  | 0 |                     | 1 |
| MV_Schw | A | 11241 | 54  | 1 |                     | 1 |
| MV_Schw | A | 11242 | 78  | 0 | 0.638894311640422   |   |
| MV_Schw | T | 11243 | 21  | 1 | 0.632968068765344   |   |
| MV_Schw | T | 11244 | 207 | 0 | 0.0469760201915419  |   |
| MV_Schw | G | 11245 | 267 | 1 | 0.184052216762354   |   |
| MV_Schw | G | 11246 | 188 | 1 | 0.542247232322076   |   |
| MV_Schw | A | 11247 | 68  | 0 | 0.789229943133706   |   |
| MV_Schw | G | 11248 | 547 | 5 | 0.118678721029391   |   |
| MV_Schw | A | 11249 | 23  | 1 |                     | 1 |
| MV_Schw | T | 11250 | 132 | 0 | 0.222002676269896   |   |
| MV_Schw | A | 11251 | 47  | 0 |                     | 1 |
| MV_Schw | T | 11252 | 120 | 1 | 0.789229943133706   |   |
| MV_Schw | G | 11253 | 314 | 1 | 0.0845982032753081  |   |
| MV_Schw | A | 11254 | 118 | 3 |                     | 1 |
| MV_Schw | G | 11255 | 479 | 4 | 0.14882153822798    |   |
| MV_Schw | A | 11256 | 10  | 0 |                     | 1 |
| MV_Schw | C | 11257 | 72  | 2 |                     | 1 |
| MV_Schw | C | 11258 | 47  | 0 |                     | 1 |
| MV_Schw | A | 11259 | 83  | 1 |                     | 1 |
| MV_Schw | T | 11260 | 56  | 2 | 0.968890372475178   |   |
| MV_Schw | C | 11261 | 155 | 2 |                     | 1 |
| MV_Schw | A | 11262 | 91  | 1 |                     | 1 |
| MV_Schw | G | 11263 | 124 | 1 | 0.791667533131283   |   |
| MV_Schw | C | 11264 | 329 | 4 | 0.789229943133706   |   |
| MV_Schw | T | 11265 | 33  | 0 |                     | 1 |
| MV_Schw | T | 11266 | 25  | 0 |                     | 1 |

|         |   |       |     |   |                   |
|---------|---|-------|-----|---|-------------------|
| MV_Schw | G | 11267 | 236 | 1 | 0.296821198756852 |
| MV_Schw | T | 11268 | 124 | 1 | 1                 |
| MV_Schw | T | 11269 | 39  | 1 | 1                 |
| MV_Schw | T | 11270 | 124 | 1 | 0.791667533131283 |
| MV_Schw | G | 11271 | 105 | 3 | 0.950262622850522 |
| MV_Schw | C | 11272 | 68  | 0 | 0.789229943133706 |
| MV_Schw | A | 11273 | 145 | 3 | 1                 |
| MV_Schw | C | 11274 | 302 | 5 | 1                 |
| MV_Schw | A | 11275 | 10  | 1 | 0.822598489333375 |
| MV_Schw | G | 11276 | 21  | 0 | 1                 |
| MV_Schw | A | 11277 | 8   | 0 | 1                 |
| MV_Schw | G | 11278 | 188 | 3 | 1                 |
| MV_Schw | G | 11279 | 209 | 1 | 0.444605338381727 |
| MV_Schw | C | 11280 | 17  | 0 | 1                 |
| MV_Schw | T | 11281 | 41  | 1 | 1                 |
| MV_Schw | A | 11282 | 14  | 0 | 1                 |
| MV_Schw | A | 11283 | 21  | 0 | 1                 |
| MV_Schw | A | 11284 | 120 | 0 | 0.297586725038221 |
| MV_Schw | T | 11285 | 83  | 0 | 0.645428736569362 |
| MV_Schw | G | 11286 | 60  | 1 | 1                 |
| MV_Schw | A | 11287 | 4   | 0 | 1                 |
| MV_Schw | G | 11288 | 134 | 2 | 1                 |
| MV_Schw | A | 11289 | 47  | 0 | 1                 |
| MV_Schw | T | 11290 | 72  | 1 | 1                 |
| MV_Schw | T | 11291 | 78  | 0 | 0.638894311640422 |
| MV_Schw | T | 11292 | 172 | 1 | 0.789229943133706 |
| MV_Schw | A | 11293 | 58  | 1 | 1                 |
| MV_Schw | C | 11294 | 376 | 3 | 0.337352366102426 |
| MV_Schw | G | 11295 | 295 | 3 | 0.503192867159235 |
| MV_Schw | G | 11296 | 60  | 1 | 1                 |
| MV_Schw | A | 11297 | 140 | 1 | 0.542247232322076 |
| MV_Schw | T | 11298 | 109 | 0 | 0.381672248067152 |
| MV_Schw | T | 11299 | 39  | 1 | 1                 |
| MV_Schw | G | 11300 | 21  | 0 | 1                 |
| MV_Schw | C | 11301 | 114 | 1 | 0.789229943133706 |
| MV_Schw | C | 11302 | 52  | 0 | 0.950262622850522 |

|         |   |       |     |   |                    |
|---------|---|-------|-----|---|--------------------|
| MV_Schw | C | 11303 | 287 | 3 | 0.499662168427985  |
| MV_Schw | T | 11304 | 17  | 0 | 1                  |
| MV_Schw | C | 11305 | 269 | 1 | 0.185820480450128  |
| MV_Schw | A | 11306 | 83  | 1 | 1                  |
| MV_Schw | T | 11307 | 109 | 0 | 0.381672248067152  |
| MV_Schw | T | 11308 | 25  | 0 | 1                  |
| MV_Schw | T | 11309 | 60  | 0 | 0.957721317456694  |
| MV_Schw | T | 11310 | 50  | 0 | 0.950262622850522  |
| MV_Schw | T | 11311 | 37  | 0 | 1                  |
| MV_Schw | C | 11312 | 461 | 2 | 0.0131040780293563 |
| MV_Schw | C | 11313 | 401 | 3 | 0.235147634457607  |
| MV_Schw | A | 11314 | 39  | 0 | 1                  |
| MV_Schw | G | 11315 | 60  | 0 | 0.957721317456694  |
| MV_Schw | T | 11316 | 114 | 0 | 0.395791012435089  |
| MV_Schw | G | 11317 | 41  | 1 | 1                  |
| MV_Schw | G | 11318 | 132 | 0 | 0.222002676269896  |
| MV_Schw | C | 11319 | 105 | 1 | 1                  |
| MV_Schw | T | 11320 | 64  | 1 | 1                  |
| MV_Schw | G | 11321 | 83  | 1 | 1                  |
| MV_Schw | C | 11322 | 39  | 0 | 1                  |
| MV_Schw | A | 11323 | 68  | 1 | 1                  |
| MV_Schw | T | 11324 | 33  | 0 | 1                  |
| MV_Schw | A | 11325 | 25  | 0 | 1                  |
| MV_Schw | A | 11326 | 54  | 0 | 0.950262622850522  |
| MV_Schw | G | 11327 | 105 | 1 | 1                  |
| MV_Schw | A | 11328 | 10  | 0 | 1                  |
| MV_Schw | G | 11329 | 151 | 2 | 1                  |
| MV_Schw | G | 11330 | 130 | 0 | 0.222002676269896  |
| MV_Schw | C | 11331 | 401 | 1 | 0.0101108442101485 |
| MV_Schw | T | 11332 | 155 | 1 | 0.88950624150852   |
| MV_Schw | T | 11333 | 128 | 0 | 0.307480793677112  |
| MV_Schw | G | 11334 | 217 | 1 | 0.355607115956135  |
| MV_Schw | A | 11335 | 8   | 0 | 1                  |
| MV_Schw | G | 11336 | 78  | 0 | 0.638894311640422  |
| MV_Schw | A | 11337 | 29  | 0 | 1                  |
| MV_Schw | C | 11338 | 68  | 1 | 1                  |

|         |   |       |      |    |                      |   |
|---------|---|-------|------|----|----------------------|---|
| MV_Schw | C | 11339 | 16   | 0  |                      | 1 |
| MV_Schw | T | 11340 | 12   | 0  |                      | 1 |
| MV_Schw | C | 11341 | 112  | 0  | 0.390108970321283    |   |
| MV_Schw | T | 11342 | 10   | 0  |                      | 1 |
| MV_Schw | G | 11343 | 83   | 0  | 0.645428736569362    |   |
| MV_Schw | T | 11344 | 2    | 0  |                      | 1 |
| MV_Schw | C | 11345 | 252  | 2  | 0.436962346550212    |   |
| MV_Schw | C | 11346 | 31   | 0  |                      | 1 |
| MV_Schw | T | 11347 | 6    | 0  |                      | 1 |
| MV_Schw | G | 11348 | 48   | 1  |                      | 1 |
| MV_Schw | T | 11349 | 19   | 0  |                      | 1 |
| MV_Schw | A | 11350 | 37   | 0  |                      | 1 |
| MV_Schw | T | 11351 | 21   | 0  |                      | 1 |
| MV_Schw | G | 11352 | 37   | 0  |                      | 1 |
| MV_Schw | T | 11353 | 2    | 0  |                      | 1 |
| MV_Schw | A | 11354 | 76   | 0  | 0.638894311640422    |   |
| MV_Schw | A | 11355 | 19   | 0  |                      | 1 |
| MV_Schw | G | 11356 | 560  | 6  | 0.276185047881473    |   |
| MV_Schw | T | 11357 | 14   | 0  |                      | 1 |
| MV_Schw | G | 11358 | 285  | 1  | 0.0364439659893172   |   |
| MV_Schw | A | 11359 | 6    | 0  |                      | 1 |
| MV_Schw | C | 11360 | 384  | 3  | 0.287197732119776    |   |
| MV_Schw | C | 11361 | 118  | 1  | 0.789229943133706    |   |
| MV_Schw | C | 11362 | 269  | 1  | 0.0493136923590554   |   |
| MV_Schw | T | 11363 | 29   | 0  |                      | 1 |
| MV_Schw | C | 11364 | 105  | 0  | 0.37877131423274     |   |
| MV_Schw | A | 11365 | 209  | 2  | 0.734151152837751    |   |
| MV_Schw | T | 11366 | 378  | 1  | 0.0191302408693408   |   |
| MV_Schw | T | 11367 | 141  | 1  | 0.542247232322076    |   |
| MV_Schw | G | 11368 | 333  | 2  | 0.151437812318609    |   |
| MV_Schw | C | 11369 | 209  | 1  | 0.444605338381727    |   |
| MV_Schw | C | 11370 | 122  | 1  | 0.791667533131283    |   |
| MV_Schw | C | 11371 | 1300 | 3  | 3.65683744054040e-11 |   |
| MV_Schw | C | 11372 | 386  | 4  | 0.445919862395878    |   |
| MV_Schw | C | 11373 | 163  | 3  |                      | 1 |
| MV_Schw | C | 11374 | 952  | 24 | 0.789229943133706    |   |

|         |   |       |     |   |                     |   |
|---------|---|-------|-----|---|---------------------|---|
| MV_Schw | C | 11375 | 151 | 3 |                     | 1 |
| MV_Schw | G | 11376 | 595 | 3 | 0.00682559034278123 |   |
| MV_Schw | A | 11377 | 25  | 1 | 0.704667204683568   |   |
| MV_Schw | C | 11378 | 155 | 5 | 0.91293301557491    |   |
| MV_Schw | C | 11379 | 85  | 1 |                     | 1 |
| MV_Schw | T | 11380 | 37  | 1 |                     | 1 |
| MV_Schw | T | 11381 | 27  | 1 |                     | 1 |
| MV_Schw | G | 11382 | 78  | 0 | 0.638894311640422   |   |
| MV_Schw | A | 11383 | 48  | 0 | 0.950262622850522   |   |
| MV_Schw | C | 11384 | 357 | 2 | 0.0898153680528284  |   |
| MV_Schw | G | 11385 | 215 | 2 | 0.737839609011326   |   |
| MV_Schw | C | 11386 | 124 | 3 |                     | 1 |
| MV_Schw | C | 11387 | 54  | 0 | 0.950262622850522   |   |
| MV_Schw | C | 11388 | 83  | 0 | 0.645428736569362   |   |
| MV_Schw | A | 11389 | 167 | 1 | 0.788293646497135   |   |
| MV_Schw | T | 11390 | 41  | 0 |                     | 1 |
| MV_Schw | A | 11391 | 14  | 0 |                     | 1 |
| MV_Schw | T | 11392 | 8   | 1 | 0.789229943133706   |   |
| MV_Schw | C | 11393 | 16  | 0 |                     | 1 |
| MV_Schw | C | 11394 | 72  | 1 |                     | 1 |
| MV_Schw | C | 11395 | 200 | 2 | 0.822598489333375   |   |
| MV_Schw | G | 11396 | 275 | 1 | 0.139259883257776   |   |
| MV_Schw | T | 11397 | 140 | 1 | 0.986363032184908   |   |
| MV_Schw | T | 11398 | 78  | 1 |                     | 1 |
| MV_Schw | A | 11399 | 35  | 0 |                     | 1 |
| MV_Schw | T | 11400 | 23  | 0 |                     | 1 |
| MV_Schw | A | 11401 | 27  | 0 |                     | 1 |
| MV_Schw | T | 11402 | 23  | 0 |                     | 1 |
| MV_Schw | A | 11403 | 91  | 1 |                     | 1 |
| MV_Schw | A | 11404 | 6   | 0 |                     | 1 |
| MV_Schw | A | 11405 | 31  | 0 |                     | 1 |
| MV_Schw | G | 11406 | 74  | 2 |                     | 1 |
| MV_Schw | T | 11407 | 41  | 1 |                     | 1 |
| MV_Schw | C | 11408 | 72  | 1 |                     | 1 |
| MV_Schw | C | 11409 | 112 | 0 | 0.390108970321283   |   |
| MV_Schw | C | 11410 | 85  | 0 | 0.648224297390367   |   |

|         |    |       |     |   |                   |
|---------|----|-------|-----|---|-------------------|
| MV_Schw | C  | 11411 | 192 | 1 | 0.542247232322076 |
| MV_Schw | A  | 11412 | 72  | 1 | 1                 |
| MV_Schw | A  | 11413 | 17  | 1 | 0.983041048229953 |
| MV_Schw | T  | 11414 | 25  | 0 | 1                 |
| MV_Schw | G  | 11415 | 10  | 0 | 1                 |
| MV_Schw | A  | 11416 | 68  | 0 | 0.789229943133706 |
| MV_Schw | T  | 11417 | 6   | 0 | 1                 |
| MV_Schw | C  | 11418 | 155 | 3 | 1                 |
| MV_Schw | A  | 11419 | 29  | 0 | 1                 |
| MV_Schw | A  | 11420 | 10  | 0 | 1                 |
| MV_Schw | A  | 11421 | 33  | 0 | 1                 |
| MV_Schw | T  | 11422 | 43  | 0 | 1                 |
| MV_Schw | C  | 11423 | 62  | 1 | 1                 |
| MV_Schw | T  | 11424 | 14  | 1 | 0.944879389258477 |
| MV_Schw | T  | 11425 | 10  | 0 | 1                 |
| MV_Schw | C  | 11426 | 297 | 3 | 0.747415194406969 |
| MV_Schw | A  | 11427 | 83  | 1 | 1                 |
| MV_Schw | T  | 11428 | 12  | 0 | 1                 |
| MV_Schw | T  | 11429 | 21  | 0 | 1                 |
| MV_Schw | A  | 11430 | 6   | 0 | 1                 |
| MV_Schw | A  | 11431 | 8   | 1 | 0.789229943133706 |
| MV_Schw | G  | 11432 | 95  | 1 | 1                 |
| MV_Schw | T  | 11433 | 103 | 1 | 1                 |
| MV_Schw | A  | 11434 | 19  | 1 | 1                 |
| MV_Schw | C  | 11435 | 21  | 0 | 1                 |
| MV_Schw | C  | 11436 | 23  | 0 | 1                 |
| MV_Schw | C  | 11437 | 33  | 0 | 1                 |
| MV_Schw | T  | 11438 | 27  | 1 | 1                 |
| MV_Schw | A  | 11439 | 19  | 0 | 1                 |
| MV_Schw | T  | 11440 | 10  | 0 | 1                 |
| MV_Schw | G  | 11441 | 97  | 0 | 0.503192867159235 |
| MV_Schw | G  | 11442 | 50  | 0 | 0.950262622850522 |
| MV_Schw | G  | 11443 | 66  | 2 | 1                 |
| MV_Schw | NA | 11444 | 0   | 0 | NA                |
| MV_Schw | G  | 11445 | 79  | 0 | 0.639207655977387 |
| MV_Schw | G  | 11446 | 17  | 0 | 1                 |

|         |   |       |     |   |                     |   |
|---------|---|-------|-----|---|---------------------|---|
| MV_Schw | T | 11447 | 31  | 1 |                     | 1 |
| MV_Schw | A | 11448 | 21  | 1 |                     | 1 |
| MV_Schw | T | 11449 | 25  | 0 |                     | 1 |
| MV_Schw | A | 11450 | 25  | 1 |                     | 1 |
| MV_Schw | G | 11451 | 87  | 1 |                     | 1 |
| MV_Schw | A | 11452 | 39  | 0 |                     | 1 |
| MV_Schw | A | 11453 | 33  | 0 |                     | 1 |
| MV_Schw | G | 11454 | 87  | 0 | 0.653463094391213   |   |
| MV_Schw | G | 11455 | 19  | 0 |                     | 1 |
| MV_Schw | G | 11456 | 72  | 1 |                     | 1 |
| MV_Schw | T | 11457 | 6   | 0 |                     | 1 |
| MV_Schw | A | 11458 | 37  | 0 |                     | 1 |
| MV_Schw | T | 11459 | 8   | 0 |                     | 1 |
| MV_Schw | T | 11460 | 12  | 0 |                     | 1 |
| MV_Schw | G | 11461 | 605 | 4 | 0.0168207902038516  |   |
| MV_Schw | T | 11462 | 33  | 1 | 0.822598489333375   |   |
| MV_Schw | C | 11463 | 149 | 1 | 0.550155392537109   |   |
| MV_Schw | A | 11464 | 188 | 3 |                     | 1 |
| MV_Schw | G | 11465 | 107 | 5 | 0.42458526175556    |   |
| MV_Schw | A | 11466 | 45  | 1 |                     | 1 |
| MV_Schw | A | 11467 | 14  | 1 | 0.426789350155389   |   |
| MV_Schw | G | 11468 | 45  | 1 |                     | 1 |
| MV_Schw | C | 11469 | 79  | 2 |                     | 1 |
| MV_Schw | T | 11470 | 21  | 0 |                     | 1 |
| MV_Schw | G | 11471 | 262 | 8 | 0.704667204683568   |   |
| MV_Schw | T | 11472 | 58  | 1 |                     | 1 |
| MV_Schw | G | 11473 | 324 | 5 |                     | 1 |
| MV_Schw | G | 11474 | 74  | 1 |                     | 1 |
| MV_Schw | A | 11475 | 45  | 0 |                     | 1 |
| MV_Schw | C | 11476 | 50  | 2 | 0.746970975838775   |   |
| MV_Schw | C | 11477 | 62  | 0 | 0.789229943133706   |   |
| MV_Schw | A | 11478 | 165 | 0 | 0.121895614141351   |   |
| MV_Schw | T | 11479 | 60  | 1 |                     | 1 |
| MV_Schw | C | 11480 | 421 | 1 | 0.00753302608313683 |   |
| MV_Schw | A | 11481 | 159 | 2 |                     | 1 |
| MV_Schw | G | 11482 | 459 | 5 | 0.359577424226080   |   |



|         |   |       |     |   |                    |
|---------|---|-------|-----|---|--------------------|
| MV_Schw | C | 11483 | 182 | 1 | 0.65158773158174   |
| MV_Schw | A | 11484 | 64  | 0 | 0.789229943133706  |
| MV_Schw | C | 11485 | 105 | 1 | 1                  |
| MV_Schw | C | 11486 | 33  | 0 | 1                  |
| MV_Schw | A | 11487 | 62  | 1 | 1                  |
| MV_Schw | T | 11488 | 27  | 1 | 1                  |
| MV_Schw | T | 11489 | 66  | 0 | 0.789229943133706  |
| MV_Schw | C | 11490 | 66  | 2 | 1                  |
| MV_Schw | C | 11491 | 194 | 1 | 0.542465567021569  |
| MV_Schw | C | 11492 | 43  | 2 | 0.632968068765344  |
| MV_Schw | T | 11493 | 52  | 0 | 0.950262622850522  |
| MV_Schw | A | 11494 | 52  | 1 | 1                  |
| MV_Schw | T | 11495 | 35  | 1 | 1                  |
| MV_Schw | C | 11496 | 60  | 0 | 0.957721317456694  |
| MV_Schw | T | 11497 | 8   | 1 | 0.789229943133706  |
| MV_Schw | A | 11498 | 17  | 0 | 1                  |
| MV_Schw | T | 11499 | 19  | 0 | 1                  |
| MV_Schw | A | 11500 | 14  | 0 | 1                  |
| MV_Schw | C | 11501 | 83  | 0 | 0.645428736569362  |
| MV_Schw | C | 11502 | 87  | 0 | 0.653463094391213  |
| MV_Schw | T | 11503 | 47  | 1 | 1                  |
| MV_Schw | G | 11504 | 62  | 2 | 0.991517221373143  |
| MV_Schw | G | 11505 | 50  | 0 | 0.950262622850522  |
| MV_Schw | C | 11506 | 281 | 2 | 0.297936084972     |
| MV_Schw | T | 11507 | 37  | 0 | 1                  |
| MV_Schw | G | 11508 | 52  | 0 | 0.950262622850522  |
| MV_Schw | C | 11509 | 79  | 1 | 1                  |
| MV_Schw | T | 11510 | 17  | 0 | 1                  |
| MV_Schw | T | 11511 | 25  | 0 | 1                  |
| MV_Schw | A | 11512 | 58  | 1 | 1                  |
| MV_Schw | T | 11513 | 97  | 1 | 0.944879389258477  |
| MV_Schw | G | 11514 | 29  | 0 | 1                  |
| MV_Schw | A | 11515 | 12  | 0 | 1                  |
| MV_Schw | G | 11516 | 215 | 1 | 0.161523149254406  |
| MV_Schw | A | 11517 | 95  | 1 | 1                  |
| MV_Schw | G | 11518 | 267 | 1 | 0.0490074444205503 |

|         |   |       |     |   |                    |   |
|---------|---|-------|-----|---|--------------------|---|
| MV_Schw | C | 11519 | 50  | 1 |                    | 1 |
| MV_Schw | G | 11520 | 79  | 1 |                    | 1 |
| MV_Schw | G | 11521 | 37  | 1 |                    | 1 |
| MV_Schw | A | 11522 | 21  | 1 |                    | 1 |
| MV_Schw | G | 11523 | 161 | 2 |                    | 1 |
| MV_Schw | T | 11524 | 52  | 0 | 0.950262622850522  |   |
| MV_Schw | A | 11525 | 66  | 0 | 0.789229943133706  |   |
| MV_Schw | A | 11526 | 4   | 0 |                    | 1 |
| MV_Schw | G | 11527 | 60  | 1 |                    | 1 |
| MV_Schw | G | 11528 | 124 | 1 | 0.791667533131283  |   |
| MV_Schw | A | 11529 | 50  | 0 | 0.950262622850522  |   |
| MV_Schw | T | 11530 | 12  | 0 |                    | 1 |
| MV_Schw | T | 11531 | 35  | 0 |                    | 1 |
| MV_Schw | G | 11532 | 25  | 0 |                    | 1 |
| MV_Schw | C | 11533 | 306 | 1 | 0.081259384624919  |   |
| MV_Schw | T | 11534 | 70  | 0 | 0.789229943133706  |   |
| MV_Schw | T | 11535 | 48  | 0 | 0.950262622850522  |   |
| MV_Schw | C | 11536 | 262 | 2 | 0.44055837109039   |   |
| MV_Schw | G | 11537 | 169 | 1 | 0.789229943133706  |   |
| MV_Schw | T | 11538 | 12  | 0 |                    | 1 |
| MV_Schw | T | 11539 | 12  | 0 |                    | 1 |
| MV_Schw | A | 11540 | 21  | 0 |                    | 1 |
| MV_Schw | G | 11541 | 58  | 0 | 0.953489044526869  |   |
| MV_Schw | T | 11542 | 37  | 0 |                    | 1 |
| MV_Schw | G | 11543 | 97  | 0 | 0.503192867159235  |   |
| MV_Schw | C | 11544 | 198 | 2 | 0.822598489333375  |   |
| MV_Schw | A | 11545 | 12  | 0 |                    | 1 |
| MV_Schw | A | 11546 | 58  | 1 |                    | 1 |
| MV_Schw | G | 11547 | 200 | 3 |                    | 1 |
| MV_Schw | G | 11548 | 95  | 0 | 0.499662168427985  |   |
| MV_Schw | G | 11549 | 473 | 2 | 0.0095386769445105 |   |
| MV_Schw | G | 11550 | 72  | 0 | 0.791667533131283  |   |
| MV_Schw | A | 11551 | 16  | 0 |                    | 1 |
| MV_Schw | C | 11552 | 97  | 1 | 0.944879389258477  |   |
| MV_Schw | A | 11553 | 41  | 1 |                    | 1 |
| MV_Schw | A | 11554 | 126 | 1 |                    | 1 |

|         |   |       |     |   |                    |
|---------|---|-------|-----|---|--------------------|
| MV_Schw | T | 11555 | 99  | 1 | 0.944879389258477  |
| MV_Schw | C | 11556 | 238 | 2 | 0.527222494111535  |
| MV_Schw | A | 11557 | 103 | 1 | 0.944879389258477  |
| MV_Schw | G | 11558 | 99  | 1 | 1                  |
| MV_Schw | A | 11559 | 68  | 0 | 0.789229943133706  |
| MV_Schw | C | 11560 | 223 | 1 | 0.357638705203787  |
| MV_Schw | C | 11561 | 76  | 1 | 1                  |
| MV_Schw | A | 11562 | 27  | 0 | 1                  |
| MV_Schw | T | 11563 | 17  | 0 | 1                  |
| MV_Schw | A | 11564 | 35  | 1 | 1                  |
| MV_Schw | G | 11565 | 159 | 3 | 1                  |
| MV_Schw | C | 11566 | 109 | 0 | 0.381672248067152  |
| MV_Schw | C | 11567 | 21  | 0 | 1                  |
| MV_Schw | G | 11568 | 159 | 1 | 0.78470776546672   |
| MV_Schw | T | 11569 | 37  | 0 | 1                  |
| MV_Schw | A | 11570 | 54  | 0 | 0.950262622850522  |
| MV_Schw | A | 11571 | 14  | 0 | 1                  |
| MV_Schw | C | 11572 | 180 | 2 | 0.945848991671798  |
| MV_Schw | A | 11573 | 76  | 0 | 0.638894311640422  |
| MV_Schw | A | 11574 | 17  | 0 | 1                  |
| MV_Schw | A | 11575 | 33  | 1 | 1                  |
| MV_Schw | A | 11576 | 48  | 0 | 0.950262622850522  |
| MV_Schw | A | 11577 | 43  | 0 | 1                  |
| MV_Schw | G | 11578 | 174 | 1 | 0.648224297390367  |
| MV_Schw | G | 11579 | 25  | 1 | 1                  |
| MV_Schw | G | 11580 | 31  | 0 | 1                  |
| MV_Schw | T | 11581 | 10  | 1 | 0.822598489333375  |
| MV_Schw | A | 11582 | 17  | 0 | 1                  |
| MV_Schw | C | 11583 | 70  | 0 | 0.789229943133706  |
| MV_Schw | C | 11584 | 95  | 1 | 1                  |
| MV_Schw | C | 11585 | 333 | 5 | 0.957721317456694  |
| MV_Schw | A | 11586 | 388 | 3 | 0.288870964410068  |
| MV_Schw | G | 11587 | 258 | 3 | 0.681308121427830  |
| MV_Schw | C | 11588 | 390 | 2 | 0.0529105666346528 |
| MV_Schw | A | 11589 | 48  | 0 | 0.950262622850522  |
| MV_Schw | C | 11590 | 271 | 3 | 0.596462243771637  |

|         |    |       |     |   |                   |
|---------|----|-------|-----|---|-------------------|
| MV_Schw | A  | 11591 | 16  | 1 | 0.950262622850522 |
| MV_Schw | T  | 11592 | 58  | 3 | 0.528591092326266 |
| MV_Schw | G  | 11593 | 62  | 1 | 1                 |
| MV_Schw | G  | 11594 | 31  | 0 | 1                 |
| MV_Schw | C  | 11595 | 428 | 2 | 0.022708666888273 |
| MV_Schw | C  | 11596 | 14  | 1 | 0.944879389258477 |
| MV_Schw | C  | 11597 | 163 | 1 | 0.442454646177787 |
| MV_Schw | T  | 11598 | 37  | 0 | 1                 |
| MV_Schw | A  | 11599 | 29  | 0 | 1                 |
| MV_Schw | C  | 11600 | 68  | 1 | 1                 |
| MV_Schw | A  | 11601 | 50  | 0 | 0.950262622850522 |
| MV_Schw | NA | 11602 | 0   | 0 | NA                |
| MV_Schw | C  | 11603 | 64  | 1 | 1                 |
| MV_Schw | C  | 11604 | 16  | 0 | 1                 |
| MV_Schw | T  | 11605 | 0   | 0 | 1                 |
| MV_Schw | T  | 11606 | 17  | 1 | 0.528591092326266 |
| MV_Schw | A  | 11607 | 78  | 0 | 0.638894311640422 |
| MV_Schw | A  | 11608 | 29  | 0 | 1                 |
| MV_Schw | G  | 11609 | 87  | 1 | 1                 |
| MV_Schw | A  | 11610 | 47  | 0 | 1                 |
| MV_Schw | A  | 11611 | 14  | 0 | 1                 |
| MV_Schw | A  | 11612 | 23  | 0 | 1                 |
| MV_Schw | C  | 11613 | 269 | 4 | 1                 |
| MV_Schw | G  | 11614 | 78  | 0 | 0.638894311640422 |
| MV_Schw | G  | 11615 | 93  | 1 | 1                 |
| MV_Schw | G  | 11616 | 105 | 0 | 0.37877131423274  |
| MV_Schw | A  | 11617 | 17  | 0 | 1                 |
| MV_Schw | A  | 11618 | 33  | 0 | 1                 |
| MV_Schw | G  | 11619 | 19  | 0 | 1                 |
| MV_Schw | C  | 11620 | 27  | 1 | 1                 |
| MV_Schw | T  | 11621 | 35  | 0 | 1                 |
| MV_Schw | G  | 11622 | 95  | 1 | 1                 |
| MV_Schw | C  | 11623 | 188 | 2 | 0.950262622850522 |
| MV_Schw | T  | 11624 | 81  | 1 | 1                 |
| MV_Schw | A  | 11625 | 37  | 0 | 1                 |
| MV_Schw | G  | 11626 | 47  | 1 | 1                 |

|         |    |       |     |   |                   |    |
|---------|----|-------|-----|---|-------------------|----|
| MV_Schw | A  | 11627 | 31  | 1 |                   | 1  |
| MV_Schw | G  | 11628 | 48  | 0 | 0.950262622850522 |    |
| MV_Schw | T  | 11629 | 21  | 0 |                   | 1  |
| MV_Schw | A  | 11630 | 2   | 0 |                   | 1  |
| MV_Schw | A  | 11631 | 8   | 0 |                   | 1  |
| MV_Schw | C  | 11632 | 143 | 1 | 0.542465567021569 |    |
| MV_Schw | T  | 11633 | 48  | 1 |                   | 1  |
| MV_Schw | A  | 11634 | 23  | 0 |                   | 1  |
| MV_Schw | G  | 11635 | 41  | 0 |                   | 1  |
| MV_Schw | A  | 11636 | 10  | 0 |                   | 1  |
| MV_Schw | G  | 11637 | 39  | 0 |                   | 1  |
| MV_Schw | A  | 11638 | 43  | 0 |                   | 1  |
| MV_Schw | T  | 11639 | 41  | 0 |                   | 1  |
| MV_Schw | T  | 11640 | 6   | 0 |                   | 1  |
| MV_Schw | A  | 11641 | 6   | 0 |                   | 1  |
| MV_Schw | C  | 11642 | 97  | 1 | 0.944879389258477 |    |
| MV_Schw | T  | 11643 | 6   | 0 |                   | 1  |
| MV_Schw | T  | 11644 | 23  | 0 |                   | 1  |
| MV_Schw | T  | 11645 | 31  | 0 |                   | 1  |
| MV_Schw | G  | 11646 | 68  | 1 |                   | 1  |
| MV_Schw | T  | 11647 | 2   | 0 |                   | 1  |
| MV_Schw | A  | 11648 | 6   | 0 |                   | 1  |
| MV_Schw | A  | 11649 | 19  | 0 |                   | 1  |
| MV_Schw | T  | 11650 | 10  | 1 | 0.822598489333375 |    |
| MV_Schw | NA | 11651 | 0   | 0 |                   | NA |
| MV_Schw | C  | 11652 | 45  | 0 |                   | 1  |
| MV_Schw | T  | 11653 | 2   | 0 |                   | 1  |
| MV_Schw | T  | 11654 | 12  | 0 |                   | 1  |
| MV_Schw | A  | 11655 | 8   | 0 |                   | 1  |
| MV_Schw | G  | 11656 | 17  | 1 | 0.983041048229953 |    |
| MV_Schw | G  | 11657 | 27  | 0 |                   | 1  |
| MV_Schw | C  | 11658 | 4   | 0 |                   | 1  |
| MV_Schw | A  | 11659 | 2   | 0 |                   | 1  |
| MV_Schw | A  | 11660 | 10  | 0 |                   | 1  |
| MV_Schw | A  | 11661 | 29  | 1 |                   | 1  |
| MV_Schw | G  | 11662 | 87  | 3 | 0.935220820395243 |    |

|         |   |       |     |   |                   |
|---------|---|-------|-----|---|-------------------|
| MV_Schw | G | 11663 | 31  | 1 | 0.791667533131283 |
| MV_Schw | C | 11664 | 19  | 0 | 1                 |
| MV_Schw | T | 11665 | 6   | 0 | 1                 |
| MV_Schw | A | 11666 | 8   | 0 | 1                 |
| MV_Schw | C | 11667 | 109 | 0 | 0.381672248067152 |
| MV_Schw | A | 11668 | 64  | 0 | 0.789229943133706 |
| MV_Schw | T | 11669 | 39  | 0 | 1                 |
| MV_Schw | G | 11670 | 21  | 1 | 1                 |
| MV_Schw | A | 11671 | 4   | 0 | 1                 |
| MV_Schw | T | 11672 | 56  | 0 | 0.950262622850522 |
| MV_Schw | A | 11673 | 97  | 0 | 0.503192867159235 |
| MV_Schw | T | 11674 | 45  | 1 | 1                 |
| MV_Schw | T | 11675 | 60  | 1 | 1                 |
| MV_Schw | G | 11676 | 27  | 1 | 1                 |
| MV_Schw | G | 11677 | 141 | 1 | 0.989441011726102 |
| MV_Schw | C | 11678 | 68  | 1 | 1                 |
| MV_Schw | C | 11679 | 163 | 1 | 0.442454646177787 |
| MV_Schw | A | 11680 | 47  | 0 | 1                 |
| MV_Schw | T | 11681 | 14  | 0 | 1                 |
| MV_Schw | C | 11682 | 31  | 0 | 1                 |
| MV_Schw | A | 11683 | 6   | 1 | 0.704667204683568 |
| MV_Schw | C | 11684 | 169 | 2 | 1                 |
| MV_Schw | C | 11685 | 50  | 0 | 0.950262622850522 |
| MV_Schw | T | 11686 | 6   | 0 | 1                 |
| MV_Schw | C | 11687 | 12  | 0 | 1                 |
| MV_Schw | A | 11688 | 12  | 0 | 1                 |
| MV_Schw | A | 11689 | 33  | 1 | 1                 |
| MV_Schw | G | 11690 | 116 | 2 | 1                 |
| MV_Schw | G | 11691 | 23  | 0 | 1                 |
| MV_Schw | C | 11692 | 19  | 0 | 1                 |
| MV_Schw | A | 11693 | 8   | 0 | 1                 |
| MV_Schw | A | 11694 | 16  | 0 | 1                 |
| MV_Schw | A | 11695 | 52  | 0 | 0.950262622850522 |
| MV_Schw | T | 11696 | 25  | 0 | 1                 |
| MV_Schw | G | 11697 | 19  | 0 | 1                 |
| MV_Schw | A | 11698 | 8   | 0 | 1                 |

|         |    |       |    |   |                   |    |
|---------|----|-------|----|---|-------------------|----|
| MV_Schw | G  | 11699 | 60 | 0 | 0.957721317456694 |    |
| MV_Schw | A  | 11700 | 8  | 0 |                   | 1  |
| MV_Schw | C  | 11701 | 52 | 1 |                   | 1  |
| MV_Schw | A  | 11702 | 2  | 1 | 0.491835918445353 |    |
| MV_Schw | A  | 11703 | 4  | 0 |                   | 1  |
| MV_Schw | T  | 11704 | 21 | 0 |                   | 1  |
| MV_Schw | T  | 11705 | 12 | 0 |                   | 1  |
| MV_Schw | G  | 11706 | 70 | 1 |                   | 1  |
| MV_Schw | T  | 11707 | 6  | 0 |                   | 1  |
| MV_Schw | T  | 11708 | 19 | 0 |                   | 1  |
| MV_Schw | T  | 11709 | 39 | 0 |                   | 1  |
| MV_Schw | C  | 11710 | 29 | 0 |                   | 1  |
| MV_Schw | A  | 11711 | 14 | 0 |                   | 1  |
| MV_Schw | T  | 11712 | 4  | 0 |                   | 1  |
| MV_Schw | C  | 11713 | 16 | 0 |                   | 1  |
| MV_Schw | A  | 11714 | 14 | 0 |                   | 1  |
| MV_Schw | C  | 11715 | 19 | 0 |                   | 1  |
| MV_Schw | A  | 11716 | 12 | 0 |                   | 1  |
| MV_Schw | NA | 11717 | 0  | 0 |                   | NA |
| MV_Schw | T  | 11718 | 0  | 1 | 0.307480793677112 |    |
| MV_Schw | T  | 11719 | 2  | 0 |                   | 1  |
| MV_Schw | T  | 11720 | 4  | 0 |                   | 1  |
| MV_Schw | T  | 11721 | 17 | 0 |                   | 1  |
| MV_Schw | T  | 11722 | 50 | 1 |                   | 1  |
| MV_Schw | T  | 11723 | 33 | 0 |                   | 1  |
| MV_Schw | G  | 11724 | 45 | 0 |                   | 1  |
| MV_Schw | T  | 11725 | 4  | 0 |                   | 1  |
| MV_Schw | C  | 11726 | 4  | 0 |                   | 1  |
| MV_Schw | NA | 11727 | 0  | 0 |                   | NA |
| MV_Schw | A  | 11728 | 10 | 0 |                   | 1  |
| MV_Schw | T  | 11729 | 27 | 0 |                   | 1  |
| MV_Schw | T  | 11730 | 19 | 0 |                   | 1  |
| MV_Schw | C  | 11731 | 23 | 1 |                   | 1  |
| MV_Schw | A  | 11732 | 17 | 0 |                   | 1  |
| MV_Schw | A  | 11733 | 6  | 0 |                   | 1  |
| MV_Schw | A  | 11734 | 70 | 0 | 0.789229943133706 |    |

|         |   |       |     |   |                    |   |
|---------|---|-------|-----|---|--------------------|---|
| MV_Schw | A | 11735 | 39  | 1 |                    | 1 |
| MV_Schw | G | 11736 | 128 | 2 |                    | 1 |
| MV_Schw | G | 11737 | 17  | 0 |                    | 1 |
| MV_Schw | A | 11738 | 2   | 0 |                    | 1 |
| MV_Schw | A | 11739 | 19  | 0 |                    | 1 |
| MV_Schw | T | 11740 | 12  | 0 |                    | 1 |
| MV_Schw | A | 11741 | 6   | 0 |                    | 1 |
| MV_Schw | T | 11742 | 2   | 1 | 0.491835918445353  |   |
| MV_Schw | A | 11743 | 79  | 1 |                    | 1 |
| MV_Schw | T | 11744 | 35  | 0 |                    | 1 |
| MV_Schw | T | 11745 | 14  | 0 |                    | 1 |
| MV_Schw | A | 11746 | 48  | 0 | 0.950262622850522  |   |
| MV_Schw | T | 11747 | 287 | 1 | 0.0368535484835669 |   |
| MV_Schw | G | 11748 | 21  | 0 |                    | 1 |
| MV_Schw | A | 11749 | 60  | 0 | 0.957721317456694  |   |
| MV_Schw | T | 11750 | 60  | 2 | 0.983041048229953  |   |
| MV_Schw | G | 11751 | 76  | 1 |                    | 1 |
| MV_Schw | G | 11752 | 97  | 1 |                    | 1 |
| MV_Schw | G | 11753 | 110 | 1 | 0.789229943133706  |   |
| MV_Schw | C | 11754 | 48  | 0 | 0.950262622850522  |   |
| MV_Schw | T | 11755 | 45  | 1 |                    | 1 |
| MV_Schw | A | 11756 | 4   | 0 |                    | 1 |
| MV_Schw | C | 11757 | 234 | 3 |                    | 1 |
| MV_Schw | T | 11758 | 35  | 0 |                    | 1 |
| MV_Schw | T | 11759 | 66  | 0 | 0.789229943133706  |   |
| MV_Schw | G | 11760 | 68  | 0 | 0.789229943133706  |   |
| MV_Schw | T | 11761 | 6   | 0 |                    | 1 |
| MV_Schw | G | 11762 | 223 | 4 |                    | 1 |
| MV_Schw | T | 11763 | 54  | 1 |                    | 1 |
| MV_Schw | C | 11764 | 116 | 1 | 0.789229943133706  |   |
| MV_Schw | C | 11765 | 16  | 0 |                    | 1 |
| MV_Schw | C | 11766 | 171 | 1 | 0.341945784780834  |   |
| MV_Schw | A | 11767 | 134 | 0 | 0.222853068696264  |   |
| MV_Schw | A | 11768 | 87  | 0 | 0.653463094391213  |   |
| MV_Schw | T | 11769 | 14  | 0 |                    | 1 |
| MV_Schw | C | 11770 | 35  | 0 |                    | 1 |



|         |   |       |     |   |                     |   |
|---------|---|-------|-----|---|---------------------|---|
| MV_Schw | A | 11771 | 6   | 0 |                     | 1 |
| MV_Schw | C | 11772 | 207 | 0 | 0.0469760201915419  |   |
| MV_Schw | T | 11773 | 8   | 0 |                     | 1 |
| MV_Schw | C | 11774 | 93  | 1 |                     | 1 |
| MV_Schw | A | 11775 | 10  | 0 |                     | 1 |
| MV_Schw | A | 11776 | 37  | 0 |                     | 1 |
| MV_Schw | G | 11777 | 45  | 0 |                     | 1 |
| MV_Schw | A | 11778 | 33  | 0 |                     | 1 |
| MV_Schw | G | 11779 | 47  | 0 |                     | 1 |
| MV_Schw | C | 11780 | 19  | 0 |                     | 1 |
| MV_Schw | A | 11781 | 37  | 1 | 0.88950624150852    |   |
| MV_Schw | T | 11782 | 68  | 1 |                     | 1 |
| MV_Schw | C | 11783 | 393 | 2 | 0.054106035846325   |   |
| MV_Schw | G | 11784 | 514 | 5 | 0.176326153322901   |   |
| MV_Schw | C | 11785 | 112 | 1 |                     | 1 |
| MV_Schw | A | 11786 | 50  | 0 | 0.950262622850522   |   |
| MV_Schw | A | 11787 | 21  | 0 |                     | 1 |
| MV_Schw | G | 11788 | 35  | 1 |                     | 1 |
| MV_Schw | A | 11789 | 21  | 0 |                     | 1 |
| MV_Schw | T | 11790 | 64  | 1 |                     | 1 |
| MV_Schw | G | 11791 | 81  | 0 | 0.641186461810141   |   |
| MV_Schw | T | 11792 | 10  | 0 |                     | 1 |
| MV_Schw | G | 11793 | 91  | 0 | 0.497615650989996   |   |
| MV_Schw | T | 11794 | 23  | 0 |                     | 1 |
| MV_Schw | A | 11795 | 83  | 1 |                     | 1 |
| MV_Schw | T | 11796 | 41  | 0 |                     | 1 |
| MV_Schw | T | 11797 | 52  | 1 |                     | 1 |
| MV_Schw | C | 11798 | 83  | 1 |                     | 1 |
| MV_Schw | T | 11799 | 64  | 1 |                     | 1 |
| MV_Schw | G | 11800 | 78  | 0 | 0.638894311640422   |   |
| MV_Schw | G | 11801 | 702 | 5 | 0.00793189441128413 |   |
| MV_Schw | T | 11802 | 39  | 0 |                     | 1 |
| MV_Schw | C | 11803 | 207 | 1 | 0.222002676269896   |   |
| MV_Schw | A | 11804 | 145 | 1 | 0.88950624150852    |   |
| MV_Schw | G | 11805 | 60  | 0 | 0.957721317456694   |   |
| MV_Schw | A | 11806 | 39  | 0 |                     | 1 |

|         |   |       |     |   |                      |   |
|---------|---|-------|-----|---|----------------------|---|
| MV_Schw | G | 11807 | 87  | 1 |                      | 1 |
| MV_Schw | A | 11808 | 14  | 0 |                      | 1 |
| MV_Schw | C | 11809 | 140 | 1 | 0.542247232322076    |   |
| MV_Schw | T | 11810 | 14  | 0 |                      | 1 |
| MV_Schw | A | 11811 | 19  | 0 |                      | 1 |
| MV_Schw | T | 11812 | 31  | 1 | 0.791667533131283    |   |
| MV_Schw | A | 11813 | 147 | 1 | 0.547090293958293    |   |
| MV_Schw | G | 11814 | 126 | 1 | 0.658415249679101    |   |
| MV_Schw | T | 11815 | 12  | 0 |                      | 1 |
| MV_Schw | T | 11816 | 110 | 0 | 0.385864542883514    |   |
| MV_Schw | G | 11817 | 455 | 3 | 0.0946571948002087   |   |
| MV_Schw | A | 11818 | 120 | 0 | 0.297586725038221    |   |
| MV_Schw | T | 11819 | 95  | 0 | 0.499662168427985    |   |
| MV_Schw | G | 11820 | 184 | 1 | 0.653463094391213    |   |
| MV_Schw | A | 11821 | 76  | 0 | 0.638894311640422    |   |
| MV_Schw | A | 11822 | 136 | 1 | 0.667619064364632    |   |
| MV_Schw | A | 11823 | 39  | 0 |                      | 1 |
| MV_Schw | C | 11824 | 275 | 1 | 0.139259883257776    |   |
| MV_Schw | A | 11825 | 29  | 1 |                      | 1 |
| MV_Schw | A | 11826 | 64  | 0 | 0.789229943133706    |   |
| MV_Schw | G | 11827 | 221 | 3 |                      | 1 |
| MV_Schw | G | 11828 | 93  | 1 |                      | 1 |
| MV_Schw | G | 11829 | 905 | 4 | 3.38345826293363e-05 |   |
| MV_Schw | C | 11830 | 70  | 0 | 0.789229943133706    |   |
| MV_Schw | A | 11831 | 45  | 0 |                      | 1 |
| MV_Schw | G | 11832 | 145 | 1 | 0.544375066438321    |   |
| MV_Schw | C | 11833 | 64  | 3 | 0.609091736782917    |   |
| MV_Schw | A | 11834 | 81  | 1 |                      | 1 |
| MV_Schw | T | 11835 | 79  | 1 |                      | 1 |
| MV_Schw | G | 11836 | 58  | 1 |                      | 1 |
| MV_Schw | C | 11837 | 643 | 7 | 0.285212858616411    |   |
| MV_Schw | A | 11838 | 50  | 0 | 0.950262622850522    |   |
| MV_Schw | G | 11839 | 597 | 4 | 0.0222273767865594   |   |
| MV_Schw | T | 11840 | 50  | 0 | 0.950262622850522    |   |
| MV_Schw | A | 11841 | 12  | 0 |                      | 1 |
| MV_Schw | A | 11842 | 21  | 1 |                      | 1 |

|         |   |       |     |   |                    |
|---------|---|-------|-----|---|--------------------|
| MV_Schw | T | 11843 | 234 | 1 | 0.296710762771661  |
| MV_Schw | A | 11844 | 89  | 0 | 0.497615650989996  |
| MV_Schw | T | 11845 | 33  | 0 | 1                  |
| MV_Schw | T | 11846 | 33  | 0 | 1                  |
| MV_Schw | G | 11847 | 85  | 0 | 0.648224297390367  |
| MV_Schw | C | 11848 | 283 | 1 | 0.0361255560727518 |
| MV_Schw | T | 11849 | 45  | 0 | 1                  |
| MV_Schw | A | 11850 | 112 | 1 | 1                  |
| MV_Schw | C | 11851 | 477 | 6 | 0.641186461810141  |
| MV_Schw | A | 11852 | 21  | 1 | 1                  |
| MV_Schw | A | 11853 | 29  | 1 | 1                  |
| MV_Schw | C | 11854 | 79  | 1 | 1                  |
| MV_Schw | A | 11855 | 39  | 1 | 0.9314909603024    |
| MV_Schw | A | 11856 | 21  | 0 | 1                  |
| MV_Schw | T | 11857 | 29  | 0 | 1                  |
| MV_Schw | G | 11858 | 41  | 2 | 0.599534349993353  |
| MV_Schw | G | 11859 | 149 | 1 | 0.550155392537109  |
| MV_Schw | C | 11860 | 97  | 1 | 1                  |
| MV_Schw | T | 11861 | 68  | 1 | 1                  |
| MV_Schw | A | 11862 | 29  | 0 | 1                  |
| MV_Schw | A | 11863 | 169 | 3 | 1                  |
| MV_Schw | A | 11864 | 21  | 0 | 1                  |
| MV_Schw | A | 11865 | 21  | 0 | 1                  |
| MV_Schw | G | 11866 | 93  | 0 | 0.498091317793217  |
| MV_Schw | C | 11867 | 91  | 1 | 1                  |
| MV_Schw | A | 11868 | 130 | 0 | 0.222002676269896  |
| MV_Schw | T | 11869 | 68  | 0 | 0.789229943133706  |
| MV_Schw | C | 11870 | 83  | 1 | 1                  |
| MV_Schw | G | 11871 | 107 | 3 | 1                  |
| MV_Schw | A | 11872 | 39  | 1 | 1                  |
| MV_Schw | G | 11873 | 163 | 0 | 0.120796610672436  |
| MV_Schw | A | 11874 | 85  | 0 | 0.648224297390367  |
| MV_Schw | G | 11875 | 211 | 3 | 0.957721317456694  |
| MV_Schw | A | 11876 | 66  | 1 | 1                  |
| MV_Schw | G | 11877 | 72  | 1 | 1                  |
| MV_Schw | G | 11878 | 388 | 5 | 0.646518100822354  |

|         |   |       |      |   |                      |   |
|---------|---|-------|------|---|----------------------|---|
| MV_Schw | T | 11879 | 14   | 0 |                      | 1 |
| MV_Schw | T | 11880 | 50   | 1 |                      | 1 |
| MV_Schw | A | 11881 | 169  | 1 | 0.789229943133706    |   |
| MV_Schw | T | 11882 | 234  | 1 | 0.125475779768559    |   |
| MV_Schw | G | 11883 | 153  | 1 | 0.88950624150852     |   |
| MV_Schw | A | 11884 | 64   | 0 | 0.789229943133706    |   |
| MV_Schw | C | 11885 | 570  | 4 | 0.0366062525741586   |   |
| MV_Schw | C | 11886 | 291  | 1 | 0.107346160145134    |   |
| MV_Schw | G | 11887 | 397  | 3 | 0.121677050932237    |   |
| MV_Schw | T | 11888 | 60   | 0 | 0.957721317456694    |   |
| MV_Schw | T | 11889 | 141  | 1 | 0.542247232322076    |   |
| MV_Schw | A | 11890 | 58   | 0 | 0.953489044526869    |   |
| MV_Schw | C | 11891 | 95   | 1 |                      | 1 |
| MV_Schw | C | 11892 | 302  | 3 | 0.422936221821337    |   |
| MV_Schw | T | 11893 | 33   | 0 |                      | 1 |
| MV_Schw | T | 11894 | 136  | 3 |                      | 1 |
| MV_Schw | G | 11895 | 83   | 0 | 0.645428736569362    |   |
| MV_Schw | C | 11896 | 308  | 2 | 0.245534395819558    |   |
| MV_Schw | A | 11897 | 95   | 0 | 0.499662168427985    |   |
| MV_Schw | T | 11898 | 62   | 0 | 0.789229943133706    |   |
| MV_Schw | A | 11899 | 19   | 0 |                      | 1 |
| MV_Schw | T | 11900 | 4    | 0 |                      | 1 |
| MV_Schw | T | 11901 | 10   | 0 |                      | 1 |
| MV_Schw | C | 11902 | 97   | 1 | 0.944879389258477    |   |
| MV_Schw | C | 11903 | 1353 | 5 | 1.78258854391723e-08 |   |
| MV_Schw | C | 11904 | 66   | 0 | 0.789229943133706    |   |
| MV_Schw | T | 11905 | 122  | 0 | 0.298485329352986    |   |
| MV_Schw | G | 11906 | 167  | 1 | 0.788293646497135    |   |
| MV_Schw | A | 11907 | 45   | 0 |                      | 1 |
| MV_Schw | A | 11908 | 27   | 0 |                      | 1 |
| MV_Schw | C | 11909 | 50   | 0 | 0.950262622850522    |   |
| MV_Schw | G | 11910 | 58   | 1 |                      | 1 |
| MV_Schw | T | 11911 | 6    | 1 | 0.704667204683568    |   |
| MV_Schw | C | 11912 | 14   | 0 |                      | 1 |
| MV_Schw | C | 11913 | 114  | 1 |                      | 1 |
| MV_Schw | T | 11914 | 54   | 1 |                      | 1 |

|         |    |       |     |   |                    |    |
|---------|----|-------|-----|---|--------------------|----|
| MV_Schw | A  | 11915 | 31  | 0 |                    | 1  |
| MV_Schw | A  | 11916 | 27  | 0 |                    | 1  |
| MV_Schw | A  | 11917 | 45  | 0 |                    | 1  |
| MV_Schw | A  | 11918 | 37  | 2 | 0.528591092326266  |    |
| MV_Schw | G  | 11919 | 138 | 2 |                    | 1  |
| MV_Schw | T  | 11920 | 17  | 1 | 0.983041048229953  |    |
| MV_Schw | G  | 11921 | 45  | 1 |                    | 1  |
| MV_Schw | A  | 11922 | 8   | 0 |                    | 1  |
| MV_Schw | T  | 11923 | 72  | 0 | 0.791667533131283  |    |
| MV_Schw | A  | 11924 | 21  | 0 |                    | 1  |
| MV_Schw | C  | 11925 | 19  | 0 |                    | 1  |
| MV_Schw | A  | 11926 | 41  | 0 |                    | 1  |
| MV_Schw | G  | 11927 | 128 | 0 | 0.307480793677112  |    |
| MV_Schw | C  | 11928 | 267 | 4 |                    | 1  |
| MV_Schw | A  | 11929 | 72  | 3 | 0.822598489333375  |    |
| MV_Schw | A  | 11930 | 66  | 0 | 0.789229943133706  |    |
| MV_Schw | A  | 11931 | 21  | 0 |                    | 1  |
| MV_Schw | T  | 11932 | 279 | 1 | 0.140118472655024  |    |
| MV_Schw | T  | 11933 | 16  | 1 | 0.950262622850522  |    |
| MV_Schw | C  | 11934 | 143 | 0 | 0.161503851613234  |    |
| MV_Schw | T  | 11935 | 79  | 0 | 0.639207655977387  |    |
| MV_Schw | G  | 11936 | 211 | 1 | 0.445919862395878  |    |
| MV_Schw | A  | 11937 | 236 | 1 | 0.0898677847554452 |    |
| MV_Schw | T  | 11938 | 68  | 0 | 0.789229943133706  |    |
| MV_Schw | C  | 11939 | 37  | 0 |                    | 1  |
| MV_Schw | NA | 11940 | 0   | 0 |                    | NA |
| MV_Schw | C  | 11941 | 37  | 0 |                    | 1  |
| MV_Schw | T  | 11942 | 48  | 1 |                    | 1  |
| MV_Schw | C  | 11943 | 597 | 4 | 0.0222273767865594 |    |
| MV_Schw | T  | 11944 | 21  | 0 |                    | 1  |
| MV_Schw | T  | 11945 | 47  | 0 |                    | 1  |
| MV_Schw | G  | 11946 | 37  | 0 |                    | 1  |
| MV_Schw | G  | 11947 | 72  | 0 | 0.791667533131283  |    |
| MV_Schw | C  | 11948 | 95  | 1 |                    | 1  |
| MV_Schw | T  | 11949 | 112 | 1 | 0.789229943133706  |    |
| MV_Schw | T  | 11950 | 62  | 0 | 0.789229943133706  |    |

|         |   |       |      |    |                    |   |
|---------|---|-------|------|----|--------------------|---|
| MV_Schw | C | 11951 | 76   | 1  |                    | 1 |
| MV_Schw | A | 11952 | 85   | 0  | 0.648224297390367  |   |
| MV_Schw | C | 11953 | 258  | 1  | 0.0678856158274816 |   |
| MV_Schw | A | 11954 | 229  | 2  | 0.632968068765344  |   |
| MV_Schw | A | 11955 | 81   | 1  |                    | 1 |
| MV_Schw | T | 11956 | 16   | 0  |                    | 1 |
| MV_Schw | C | 11957 | 48   | 1  |                    | 1 |
| MV_Schw | A | 11958 | 56   | 0  | 0.950262622850522  |   |
| MV_Schw | A | 11959 | 31   | 0  |                    | 1 |
| MV_Schw | T | 11960 | 47   | 0  |                    | 1 |
| MV_Schw | T | 11961 | 23   | 0  |                    | 1 |
| MV_Schw | C | 11962 | 31   | 1  |                    | 1 |
| MV_Schw | A | 11963 | 47   | 0  |                    | 1 |
| MV_Schw | A | 11964 | 6    | 0  |                    | 1 |
| MV_Schw | C | 11965 | 378  | 4  | 0.528591092326266  |   |
| MV_Schw | C | 11966 | 27   | 0  |                    | 1 |
| MV_Schw | A | 11967 | 10   | 1  | 0.822598489333375  |   |
| MV_Schw | T | 11968 | 14   | 0  |                    | 1 |
| MV_Schw | G | 11969 | 35   | 0  |                    | 1 |
| MV_Schw | A | 11970 | 25   | 0  |                    | 1 |
| MV_Schw | C | 11971 | 180  | 1  | 0.355193190288496  |   |
| MV_Schw | C | 11972 | 1017 | 11 | 0.0479728580883292 |   |
| MV_Schw | C | 11973 | 66   | 0  | 0.789229943133706  |   |
| MV_Schw | G | 11974 | 184  | 1  | 0.653463094391213  |   |
| MV_Schw | G | 11975 | 250  | 2  | 0.532478122982245  |   |
| MV_Schw | G | 11976 | 324  | 3  | 0.556022603372884  |   |
| MV_Schw | A | 11977 | 54   | 1  |                    | 1 |
| MV_Schw | T | 11978 | 159  | 1  | 0.437783686960654  |   |
| MV_Schw | G | 11979 | 79   | 3  | 0.658415249679101  |   |
| MV_Schw | T | 11980 | 29   | 1  | 0.789229943133706  |   |
| MV_Schw | A | 11981 | 91   | 0  | 0.497615650989996  |   |
| MV_Schw | G | 11982 | 300  | 3  | 0.751501025978229  |   |
| MV_Schw | T | 11983 | 141  | 1  | 0.989441011726102  |   |
| MV_Schw | C | 11984 | 126  | 0  | 0.305061614162072  |   |
| MV_Schw | A | 11985 | 310  | 3  | 0.646034462647135  |   |
| MV_Schw | T | 11986 | 48   | 0  | 0.950262622850522  |   |

|         |   |       |     |   |                   |
|---------|---|-------|-----|---|-------------------|
| MV_Schw | A | 11987 | 221 | 2 | 0.746970975838775 |
| MV_Schw | C | 11988 | 93  | 1 | 1                 |
| MV_Schw | C | 11989 | 68  | 1 | 1                 |
| MV_Schw | C | 11990 | 64  | 0 | 0.789229943133706 |
| MV_Schw | C | 11991 | 211 | 3 | 0.957721317456694 |
| MV_Schw | T | 11992 | 21  | 0 | 1                 |
| MV_Schw | C | 11993 | 64  | 0 | 0.789229943133706 |
| MV_Schw | C | 11994 | 110 | 1 | 0.789229943133706 |
| MV_Schw | T | 11995 | 52  | 0 | 0.950262622850522 |
| MV_Schw | C | 11996 | 155 | 1 | 0.88950624150852  |
| MV_Schw | A | 11997 | 10  | 0 | 1                 |
| MV_Schw | C | 11998 | 252 | 1 | 0.235179608025014 |
| MV_Schw | A | 11999 | 29  | 0 | 1                 |
| MV_Schw | A | 12000 | 12  | 1 | 0.88950624150852  |
| MV_Schw | A | 12001 | 62  | 0 | 0.789229943133706 |
| MV_Schw | C | 12002 | 124 | 1 | 0.791667533131283 |
| MV_Schw | A | 12003 | 23  | 0 | 1                 |
| MV_Schw | A | 12004 | 21  | 0 | 1                 |
| MV_Schw | C | 12005 | 130 | 0 | 0.222002676269896 |
| MV_Schw | G | 12006 | 35  | 2 | 0.497615650989996 |
| MV_Schw | A | 12007 | 10  | 0 | 1                 |
| MV_Schw | C | 12008 | 105 | 1 | 0.944944073306986 |
| MV_Schw | C | 12009 | 21  | 1 | 0.632968068765344 |
| MV_Schw | T | 12010 | 21  | 0 | 1                 |
| MV_Schw | C | 12011 | 52  | 0 | 0.950262622850522 |
| MV_Schw | T | 12012 | 14  | 0 | 1                 |
| MV_Schw | T | 12013 | 23  | 0 | 1                 |
| MV_Schw | A | 12014 | 35  | 0 | 1                 |
| MV_Schw | A | 12015 | 70  | 0 | 0.789229943133706 |
| MV_Schw | T | 12016 | 74  | 1 | 1                 |
| MV_Schw | A | 12017 | 29  | 0 | 1                 |
| MV_Schw | A | 12018 | 10  | 0 | 1                 |
| MV_Schw | G | 12019 | 87  | 1 | 1                 |
| MV_Schw | G | 12020 | 41  | 0 | 1                 |
| MV_Schw | A | 12021 | 19  | 0 | 1                 |
| MV_Schw | T | 12022 | 120 | 1 | 0.789229943133706 |

|         |   |       |     |   |                    |   |
|---------|---|-------|-----|---|--------------------|---|
| MV_Schw | G | 12023 | 43  | 0 |                    | 1 |
| MV_Schw | G | 12024 | 21  | 0 |                    | 1 |
| MV_Schw | C | 12025 | 116 | 0 | 0.296710762771661  |   |
| MV_Schw | A | 12026 | 31  | 1 |                    | 1 |
| MV_Schw | C | 12027 | 110 | 1 | 0.789229943133706  |   |
| MV_Schw | T | 12028 | 17  | 0 |                    | 1 |
| MV_Schw | G | 12029 | 176 | 2 |                    | 1 |
| MV_Schw | T | 12030 | 10  | 0 |                    | 1 |
| MV_Schw | T | 12031 | 23  | 0 |                    | 1 |
| MV_Schw | G | 12032 | 194 | 1 | 0.288870964410068  |   |
| MV_Schw | C | 12033 | 143 | 0 | 0.161503851613234  |   |
| MV_Schw | C | 12034 | 138 | 1 | 0.673422966374487  |   |
| MV_Schw | C | 12035 | 196 | 0 | 0.0437133877334182 |   |
| MV_Schw | G | 12036 | 85  | 0 | 0.648224297390367  |   |
| MV_Schw | C | 12037 | 157 | 2 |                    | 1 |
| MV_Schw | T | 12038 | 14  | 1 | 0.944879389258477  |   |
| MV_Schw | C | 12039 | 29  | 0 |                    | 1 |
| MV_Schw | C | 12040 | 60  | 0 | 0.957721317456694  |   |
| MV_Schw | T | 12041 | 2   | 0 |                    | 1 |
| MV_Schw | A | 12042 | 16  | 0 |                    | 1 |
| MV_Schw | T | 12043 | 21  | 0 |                    | 1 |
| MV_Schw | T | 12044 | 43  | 0 |                    | 1 |
| MV_Schw | G | 12045 | 74  | 3 | 0.831755077907185  |   |
| MV_Schw | G | 12046 | 176 | 3 |                    | 1 |
| MV_Schw | G | 12047 | 47  | 0 |                    | 1 |
| MV_Schw | G | 12048 | 56  | 0 | 0.950262622850522  |   |
| MV_Schw | G | 12049 | 23  | 1 | 0.658415249679101  |   |
| MV_Schw | G | 12050 | 157 | 0 | 0.118807954027477  |   |
| MV_Schw | A | 12051 | 37  | 0 |                    | 1 |
| MV_Schw | T | 12052 | 41  | 0 |                    | 1 |
| MV_Schw | G | 12053 | 547 | 3 | 0.0212214795290776 |   |
| MV_Schw | A | 12054 | 103 | 1 | 0.944879389258477  |   |
| MV_Schw | A | 12055 | 78  | 1 |                    | 1 |
| MV_Schw | T | 12056 | 35  | 1 |                    | 1 |
| MV_Schw | T | 12057 | 52  | 1 |                    | 1 |
| MV_Schw | A | 12058 | 60  | 0 | 0.957721317456694  |   |



|         |   |       |      |    |                     |
|---------|---|-------|------|----|---------------------|
| MV_Schw | T | 12059 | 132  | 1  | 0.659520109379356   |
| MV_Schw | C | 12060 | 1037 | 12 | 0.103452875688776   |
| MV_Schw | T | 12061 | 227  | 1  | 0.362346869888542   |
| MV_Schw | G | 12062 | 43   | 1  | 0.950262622850522   |
| MV_Schw | A | 12063 | 33   | 0  | 1                   |
| MV_Schw | A | 12064 | 145  | 3  | 1                   |
| MV_Schw | T | 12065 | 157  | 2  | 1                   |
| MV_Schw | A | 12066 | 23   | 0  | 1                   |
| MV_Schw | T | 12067 | 198  | 3  | 1                   |
| MV_Schw | G | 12068 | 244  | 3  | 0.996771597822493   |
| MV_Schw | A | 12069 | 27   | 1  | 1                   |
| MV_Schw | G | 12070 | 579  | 11 | 1                   |
| MV_Schw | C | 12071 | 169  | 2  | 1                   |
| MV_Schw | A | 12072 | 56   | 2  | 0.968890372475178   |
| MV_Schw | G | 12073 | 126  | 0  | 0.305061614162072   |
| MV_Schw | G | 12074 | 184  | 5  | 1                   |
| MV_Schw | C | 12075 | 43   | 1  | 1                   |
| MV_Schw | T | 12076 | 50   | 1  | 1                   |
| MV_Schw | G | 12077 | 297  | 3  | 0.503622649662695   |
| MV_Schw | T | 12078 | 27   | 1  | 1                   |
| MV_Schw | T | 12079 | 25   | 0  | 1                   |
| MV_Schw | T | 12080 | 56   | 0  | 0.950262622850522   |
| MV_Schw | G | 12081 | 326  | 2  | 0.149071756066224   |
| MV_Schw | T | 12082 | 10   | 0  | 1                   |
| MV_Schw | C | 12083 | 426  | 5  | 0.497615650989996   |
| MV_Schw | A | 12084 | 105  | 1  | 1                   |
| MV_Schw | G | 12085 | 326  | 5  | 0.954925832278678   |
| MV_Schw | A | 12086 | 10   | 0  | 1                   |
| MV_Schw | A | 12087 | 21   | 1  | 0.632968068765344   |
| MV_Schw | A | 12088 | 14   | 0  | 1                   |
| MV_Schw | C | 12089 | 157  | 1  | 0.88950624150852    |
| MV_Schw | A | 12090 | 37   | 0  | 1                   |
| MV_Schw | T | 12091 | 25   | 1  | 1                   |
| MV_Schw | C | 12092 | 705  | 4  | 0.00238953033826470 |
| MV_Schw | G | 12093 | 132  | 1  | 0.659520109379356   |
| MV_Schw | G | 12094 | 293  | 3  | 0.746970975838775   |

|         |   |       |     |   |                   |   |
|---------|---|-------|-----|---|-------------------|---|
| MV_Schw | T | 12095 | 21  | 0 |                   | 1 |
| MV_Schw | G | 12096 | 242 | 3 | 0.789229943133706 |   |
| MV_Schw | A | 12097 | 29  | 0 |                   | 1 |
| MV_Schw | T | 12098 | 58  | 0 | 0.953489044526869 |   |
| MV_Schw | C | 12099 | 23  | 0 |                   | 1 |
| MV_Schw | C | 12100 | 203 | 1 | 0.44280652126772  |   |
| MV_Schw | A | 12101 | 50  | 0 | 0.950262622850522 |   |
| MV_Schw | G | 12102 | 312 | 3 | 0.647007014396193 |   |
| MV_Schw | T | 12103 | 45  | 0 |                   | 1 |
| MV_Schw | A | 12104 | 29  | 1 |                   | 1 |
| MV_Schw | A | 12105 | 21  | 0 |                   | 1 |
| MV_Schw | C | 12106 | 37  | 0 |                   | 1 |
| MV_Schw | A | 12107 | 50  | 0 | 0.950262622850522 |   |
| MV_Schw | T | 12108 | 19  | 0 |                   | 1 |
| MV_Schw | C | 12109 | 112 | 2 |                   | 1 |
| MV_Schw | A | 12110 | 83  | 0 | 0.645428736569362 |   |
| MV_Schw | T | 12111 | 8   | 0 |                   | 1 |
| MV_Schw | C | 12112 | 180 | 1 | 0.649372270546162 |   |
| MV_Schw | A | 12113 | 95  | 0 | 0.499662168427985 |   |
| MV_Schw | A | 12114 | 43  | 1 |                   | 1 |
| MV_Schw | T | 12115 | 31  | 0 |                   | 1 |
| MV_Schw | T | 12116 | 132 | 0 | 0.222002676269896 |   |
| MV_Schw | G | 12117 | 196 | 3 |                   | 1 |
| MV_Schw | C | 12118 | 192 | 3 |                   | 1 |
| MV_Schw | T | 12119 | 31  | 1 |                   | 1 |
| MV_Schw | G | 12120 | 203 | 2 | 0.822598489333375 |   |
| MV_Schw | A | 12121 | 19  | 0 |                   | 1 |
| MV_Schw | T | 12122 | 81  | 0 | 0.641186461810141 |   |
| MV_Schw | C | 12123 | 68  | 1 |                   | 1 |
| MV_Schw | T | 12124 | 23  | 1 |                   | 1 |
| MV_Schw | C | 12125 | 50  | 0 | 0.950262622850522 |   |
| MV_Schw | A | 12126 | 74  | 0 | 0.795198078226602 |   |
| MV_Schw | A | 12127 | 105 | 3 | 0.950262622850522 |   |
| MV_Schw | G | 12128 | 155 | 1 | 0.436311974989592 |   |
| MV_Schw | A | 12129 | 12  | 0 |                   | 1 |
| MV_Schw | G | 12130 | 161 | 1 | 0.440157375549872 |   |

|         |   |       |     |   |                     |   |
|---------|---|-------|-----|---|---------------------|---|
| MV_Schw | A | 12131 | 39  | 0 |                     | 1 |
| MV_Schw | A | 12132 | 33  | 0 |                     | 1 |
| MV_Schw | T | 12133 | 112 | 0 | 0.390108970321283   |   |
| MV_Schw | G | 12134 | 70  | 1 |                     | 1 |
| MV_Schw | A | 12135 | 41  | 1 |                     | 1 |
| MV_Schw | T | 12136 | 50  | 1 |                     | 1 |
| MV_Schw | T | 12137 | 209 | 2 | 0.734151152837751   |   |
| MV_Schw | C | 12138 | 229 | 0 | 0.0226023994581542  |   |
| MV_Schw | T | 12139 | 10  | 0 |                     | 1 |
| MV_Schw | C | 12140 | 172 | 1 | 0.342651296301386   |   |
| MV_Schw | G | 12141 | 333 | 1 | 0.00991162712036537 |   |
| MV_Schw | C | 12142 | 258 | 2 | 0.437908798039714   |   |
| MV_Schw | C | 12143 | 192 | 1 | 0.285482351071617   |   |
| MV_Schw | T | 12144 | 23  | 0 |                     | 1 |
| MV_Schw | C | 12145 | 132 | 1 | 0.983041048229953   |   |
| MV_Schw | A | 12146 | 21  | 0 |                     | 1 |
| MV_Schw | C | 12147 | 68  | 1 |                     | 1 |
| MV_Schw | T | 12148 | 50  | 0 | 0.950262622850522   |   |
| MV_Schw | A | 12149 | 21  | 1 |                     | 1 |
| MV_Schw | A | 12150 | 4   | 0 |                     | 1 |
| MV_Schw | T | 12151 | 43  | 1 |                     | 1 |
| MV_Schw | G | 12152 | 56  | 0 | 0.950262622850522   |   |
| MV_Schw | C | 12153 | 153 | 1 | 0.88950624150852    |   |
| MV_Schw | C | 12154 | 105 | 0 | 0.37877131423274    |   |
| MV_Schw | T | 12155 | 54  | 0 | 0.950262622850522   |   |
| MV_Schw | G | 12156 | 362 | 4 | 0.618143728331124   |   |
| MV_Schw | A | 12157 | 105 | 0 | 0.37877131423274    |   |
| MV_Schw | A | 12158 | 155 | 1 | 0.88950624150852    |   |
| MV_Schw | G | 12159 | 172 | 1 | 0.342651296301386   |   |
| MV_Schw | A | 12160 | 45  | 1 |                     | 1 |
| MV_Schw | G | 12161 | 43  | 0 |                     | 1 |
| MV_Schw | A | 12162 | 10  | 0 |                     | 1 |
| MV_Schw | C | 12163 | 209 | 4 |                     | 1 |
| MV_Schw | C | 12164 | 219 | 3 |                     | 1 |
| MV_Schw | C | 12165 | 70  | 0 | 0.789229943133706   |   |
| MV_Schw | T | 12166 | 54  | 2 | 0.789229943133706   |   |

|         |   |       |     |   |                     |   |
|---------|---|-------|-----|---|---------------------|---|
| MV_Schw | C | 12167 | 103 | 1 |                     | 1 |
| MV_Schw | C | 12168 | 328 | 6 |                     | 1 |
| MV_Schw | A | 12169 | 244 | 7 | 0.930221016257973   |   |
| MV_Schw | T | 12170 | 54  | 2 | 0.789229943133706   |   |
| MV_Schw | C | 12171 | 126 | 3 |                     | 1 |
| MV_Schw | A | 12172 | 43  | 1 |                     | 1 |
| MV_Schw | A | 12173 | 54  | 1 |                     | 1 |
| MV_Schw | G | 12174 | 190 | 8 | 0.227876189492639   |   |
| MV_Schw | T | 12175 | 81  | 1 |                     | 1 |
| MV_Schw | A | 12176 | 10  | 0 |                     | 1 |
| MV_Schw | A | 12177 | 4   | 0 |                     | 1 |
| MV_Schw | T | 12178 | 64  | 1 |                     | 1 |
| MV_Schw | G | 12179 | 130 | 1 | 0.658415249679101   |   |
| MV_Schw | A | 12180 | 27  | 0 |                     | 1 |
| MV_Schw | C | 12181 | 246 | 5 |                     | 1 |
| MV_Schw | A | 12182 | 27  | 0 |                     | 1 |
| MV_Schw | C | 12183 | 229 | 0 | 0.0226023994581542  |   |
| MV_Schw | A | 12184 | 89  | 1 |                     | 1 |
| MV_Schw | A | 12185 | 25  | 0 |                     | 1 |
| MV_Schw | C | 12186 | 240 | 1 | 0.298485329352986   |   |
| MV_Schw | A | 12187 | 39  | 1 |                     | 1 |
| MV_Schw | A | 12188 | 19  | 1 |                     | 1 |
| MV_Schw | C | 12189 | 403 | 3 | 0.0931787203291559  |   |
| MV_Schw | C | 12190 | 196 | 1 | 0.214586843368945   |   |
| MV_Schw | G | 12191 | 266 | 0 | 0.00770605171892268 |   |
| MV_Schw | G | 12192 | 607 | 6 | 0.158882742848662   |   |
| MV_Schw | G | 12193 | 719 | 7 | 0.0666530655058788  |   |
| MV_Schw | G | 12194 | 283 | 1 | 0.0361255560727518  |   |
| MV_Schw | G | 12195 | 56  | 1 |                     | 1 |
| MV_Schw | A | 12196 | 17  | 0 |                     | 1 |
| MV_Schw | C | 12197 | 93  | 1 |                     | 1 |
| MV_Schw | T | 12198 | 29  | 0 |                     | 1 |
| MV_Schw | C | 12199 | 295 | 2 | 0.305061614162072   |   |
| MV_Schw | T | 12200 | 56  | 0 | 0.950262622850522   |   |
| MV_Schw | T | 12201 | 19  | 0 |                     | 1 |
| MV_Schw | C | 12202 | 229 | 1 | 0.121832950892168   |   |

|         |   |       |     |   |                    |
|---------|---|-------|-----|---|--------------------|
| MV_Schw | A | 12203 | 112 | 0 | 0.390108970321283  |
| MV_Schw | T | 12204 | 39  | 0 | 1                  |
| MV_Schw | T | 12205 | 27  | 1 | 0.752394317790241  |
| MV_Schw | C | 12206 | 81  | 1 | 1                  |
| MV_Schw | C | 12207 | 132 | 1 | 0.659520109379356  |
| MV_Schw | T | 12208 | 2   | 0 | 1                  |
| MV_Schw | A | 12209 | 41  | 1 | 1                  |
| MV_Schw | G | 12210 | 184 | 1 | 0.653463094391213  |
| MV_Schw | A | 12211 | 8   | 0 | 1                  |
| MV_Schw | C | 12212 | 93  | 1 | 1                  |
| MV_Schw | T | 12213 | 10  | 0 | 1                  |
| MV_Schw | G | 12214 | 78  | 0 | 0.638894311640422  |
| MV_Schw | G | 12215 | 54  | 0 | 0.950262622850522  |
| MV_Schw | G | 12216 | 76  | 1 | 1                  |
| MV_Schw | C | 12217 | 359 | 1 | 0.0254600581365598 |
| MV_Schw | T | 12218 | 41  | 0 | 1                  |
| MV_Schw | A | 12219 | 48  | 0 | 0.950262622850522  |
| MV_Schw | G | 12220 | 246 | 0 | 0.0168207902038516 |
| MV_Schw | C | 12221 | 122 | 1 | 0.791667533131283  |
| MV_Schw | G | 12222 | 279 | 3 | 0.819327818667335  |
| MV_Schw | A | 12223 | 10  | 0 | 1                  |
| MV_Schw | C | 12224 | 186 | 1 | 0.278307737263878  |
| MV_Schw | C | 12225 | 89  | 0 | 0.497615650989996  |
| MV_Schw | C | 12226 | 41  | 0 | 1                  |
| MV_Schw | T | 12227 | 35  | 1 | 1                  |
| MV_Schw | T | 12228 | 17  | 0 | 1                  |
| MV_Schw | A | 12229 | 10  | 1 | 0.822598489333375  |
| MV_Schw | C | 12230 | 128 | 2 | 1                  |
| MV_Schw | T | 12231 | 19  | 0 | 1                  |
| MV_Schw | C | 12232 | 45  | 1 | 1                  |
| MV_Schw | A | 12233 | 107 | 0 | 0.380027812845055  |
| MV_Schw | G | 12234 | 74  | 1 | 1                  |
| MV_Schw | C | 12235 | 176 | 0 | 0.0873173091778286 |
| MV_Schw | A | 12236 | 76  | 1 | 1                  |
| MV_Schw | A | 12237 | 39  | 0 | 1                  |
| MV_Schw | A | 12238 | 31  | 0 | 1                  |

|         |    |       |     |   |                    |    |
|---------|----|-------|-----|---|--------------------|----|
| MV_Schw | T  | 12239 | 23  | 0 |                    | 1  |
| MV_Schw | C  | 12240 | 163 | 1 | 0.442454646177787  |    |
| MV_Schw | T  | 12241 | 2   | 0 |                    | 1  |
| MV_Schw | T  | 12242 | 37  | 0 |                    | 1  |
| MV_Schw | G  | 12243 | 163 | 0 | 0.120796610672436  |    |
| MV_Schw | T  | 12244 | 116 | 0 | 0.296710762771661  |    |
| MV_Schw | A  | 12245 | 12  | 0 |                    | 1  |
| MV_Schw | T  | 12246 | 29  | 1 |                    | 1  |
| MV_Schw | G  | 12247 | 6   | 0 |                    | 1  |
| MV_Schw | NA | 12248 | 0   | 0 |                    | NA |
| MV_Schw | G  | 12249 | 238 | 1 | 0.297586725038221  |    |
| MV_Schw | T  | 12250 | 43  | 1 | 0.950262622850522  |    |
| MV_Schw | C  | 12251 | 452 | 4 | 0.226501401371001  |    |
| MV_Schw | C  | 12252 | 145 | 0 | 0.161503851613234  |    |
| MV_Schw | A  | 12253 | 359 | 2 | 0.0899737520860967 |    |
| MV_Schw | G  | 12254 | 192 | 0 | 0.0637677617687036 |    |
| MV_Schw | A  | 12255 | 83  | 1 |                    | 1  |
| MV_Schw | G  | 12256 | 132 | 1 | 0.983041048229953  |    |
| MV_Schw | C  | 12257 | 202 | 1 | 0.551026371204373  |    |
| MV_Schw | A  | 12258 | 17  | 0 |                    | 1  |
| MV_Schw | T  | 12259 | 68  | 0 | 0.789229943133706  |    |
| MV_Schw | C  | 12260 | 83  | 1 |                    | 1  |
| MV_Schw | A  | 12261 | 145 | 1 | 0.544375066438321  |    |
| MV_Schw | C  | 12262 | 514 | 3 | 0.0351061035438848 |    |
| MV_Schw | T  | 12263 | 33  | 0 |                    | 1  |
| MV_Schw | A  | 12264 | 48  | 0 | 0.950262622850522  |    |
| MV_Schw | G  | 12265 | 52  | 0 | 0.950262622850522  |    |
| MV_Schw | A  | 12266 | 16  | 0 |                    | 1  |
| MV_Schw | C  | 12267 | 114 | 0 | 0.395791012435089  |    |
| MV_Schw | T  | 12268 | 8   | 0 |                    | 1  |
| MV_Schw | C  | 12269 | 16  | 0 |                    | 1  |
| MV_Schw | C  | 12270 | 62  | 2 | 0.991517221373143  |    |
| MV_Schw | T  | 12271 | 10  | 0 |                    | 1  |
| MV_Schw | C  | 12272 | 136 | 1 | 0.983041048229953  |    |
| MV_Schw | A  | 12273 | 47  | 0 |                    | 1  |
| MV_Schw | A  | 12274 | 21  | 0 |                    | 1  |

|         |    |       |     |   |                   |    |
|---------|----|-------|-----|---|-------------------|----|
| MV_Schw | G  | 12275 | 72  | 1 |                   | 1  |
| MV_Schw | A  | 12276 | 2   | 0 |                   | 1  |
| MV_Schw | A  | 12277 | 4   | 0 |                   | 1  |
| MV_Schw | C  | 12278 | 19  | 1 |                   | 1  |
| MV_Schw | A  | 12279 | 14  | 0 |                   | 1  |
| MV_Schw | T  | 12280 | 25  | 0 |                   | 1  |
| MV_Schw | A  | 12281 | 6   | 0 |                   | 1  |
| MV_Schw | NA | 12282 | 0   | 0 |                   | NA |
| MV_Schw | C  | 12283 | 27  | 0 |                   | 1  |
| MV_Schw | T  | 12284 | 12  | 0 |                   | 1  |
| MV_Schw | G  | 12285 | 72  | 0 | 0.791667533131283 |    |
| MV_Schw | C  | 12286 | 78  | 0 | 0.638894311640422 |    |
| MV_Schw | A  | 12287 | 25  | 0 |                   | 1  |
| MV_Schw | A  | 12288 | 19  | 0 |                   | 1  |
| MV_Schw | G  | 12289 | 62  | 1 |                   | 1  |
| MV_Schw | G  | 12290 | 48  | 1 |                   | 1  |
| MV_Schw | T  | 12291 | 14  | 0 |                   | 1  |
| MV_Schw | T  | 12292 | 4   | 0 |                   | 1  |
| MV_Schw | T  | 12293 | 60  | 1 |                   | 1  |
| MV_Schw | G  | 12294 | 147 | 1 | 0.547090293958293 |    |
| MV_Schw | T  | 12295 | 48  | 0 | 0.950262622850522 |    |
| MV_Schw | C  | 12296 | 287 | 3 | 0.499662168427985 |    |
| MV_Schw | C  | 12297 | 219 | 1 | 0.164760602972146 |    |
| MV_Schw | T  | 12298 | 14  | 0 |                   | 1  |
| MV_Schw | G  | 12299 | 62  | 0 | 0.789229943133706 |    |
| MV_Schw | A  | 12300 | 56  | 1 |                   | 1  |
| MV_Schw | T  | 12301 | 62  | 0 | 0.789229943133706 |    |
| MV_Schw | C  | 12302 | 78  | 1 |                   | 1  |
| MV_Schw | C  | 12303 | 12  | 0 |                   | 1  |
| MV_Schw | A  | 12304 | 41  | 0 |                   | 1  |
| MV_Schw | T  | 12305 | 27  | 0 |                   | 1  |
| MV_Schw | A  | 12306 | 169 | 1 | 0.341186273229673 |    |
| MV_Schw | G  | 12307 | 76  | 1 |                   | 1  |
| MV_Schw | T  | 12308 | 95  | 1 |                   | 1  |
| MV_Schw | C  | 12309 | 8   | 0 |                   | 1  |
| MV_Schw | C  | 12310 | 130 | 1 | 0.983041048229953 |    |

|         |   |       |     |   |                   |   |
|---------|---|-------|-----|---|-------------------|---|
| MV_Schw | A | 12311 | 31  | 0 |                   | 1 |
| MV_Schw | A | 12312 | 43  | 0 |                   | 1 |
| MV_Schw | A | 12313 | 33  | 0 |                   | 1 |
| MV_Schw | C | 12314 | 128 | 2 |                   | 1 |
| MV_Schw | C | 12315 | 27  | 1 |                   | 1 |
| MV_Schw | C | 12316 | 8   | 1 | 0.789229943133706 |   |
| MV_Schw | A | 12317 | 33  | 1 |                   | 1 |
| MV_Schw | A | 12318 | 31  | 1 |                   | 1 |
| MV_Schw | T | 12319 | 17  | 0 |                   | 1 |
| MV_Schw | G | 12320 | 29  | 0 |                   | 1 |
| MV_Schw | T | 12321 | 4   | 0 |                   | 1 |
| MV_Schw | T | 12322 | 2   | 0 |                   | 1 |
| MV_Schw | A | 12323 | 14  | 0 |                   | 1 |
| MV_Schw | A | 12324 | 33  | 1 | 0.822598489333375 |   |
| MV_Schw | A | 12325 | 19  | 0 |                   | 1 |
| MV_Schw | A | 12326 | 126 | 1 | 0.658415249679101 |   |
| MV_Schw | G | 12327 | 81  | 1 |                   | 1 |
| MV_Schw | G | 12328 | 79  | 0 | 0.639207655977387 |   |
| MV_Schw | A | 12329 | 10  | 0 |                   | 1 |
| MV_Schw | T | 12330 | 31  | 0 |                   | 1 |
| MV_Schw | T | 12331 | 16  | 0 |                   | 1 |
| MV_Schw | A | 12332 | 16  | 0 |                   | 1 |
| MV_Schw | T | 12333 | 10  | 0 |                   | 1 |
| MV_Schw | T | 12334 | 39  | 0 |                   | 1 |
| MV_Schw | C | 12335 | 97  | 1 | 0.944879389258477 |   |
| MV_Schw | C | 12336 | 37  | 0 |                   | 1 |
| MV_Schw | A | 12337 | 14  | 0 |                   | 1 |
| MV_Schw | T | 12338 | 33  | 0 |                   | 1 |
| MV_Schw | G | 12339 | 25  | 0 |                   | 1 |
| MV_Schw | A | 12340 | 10  | 0 |                   | 1 |
| MV_Schw | T | 12341 | 159 | 1 | 0.437783686960654 |   |
| MV_Schw | G | 12342 | 14  | 1 | 0.944879389258477 |   |
| MV_Schw | A | 12343 | 6   | 0 |                   | 1 |
| MV_Schw | C | 12344 | 81  | 1 |                   | 1 |
| MV_Schw | A | 12345 | 17  | 0 |                   | 1 |
| MV_Schw | G | 12346 | 138 | 1 | 0.983694697749173 |   |



|         |   |       |     |    |                     |   |
|---------|---|-------|-----|----|---------------------|---|
| MV_Schw | T | 12347 | 12  | 0  |                     | 1 |
| MV_Schw | A | 12348 | 89  | 1  |                     | 1 |
| MV_Schw | A | 12349 | 52  | 0  | 0.950262622850522   |   |
| MV_Schw | A | 12350 | 16  | 0  |                     | 1 |
| MV_Schw | G | 12351 | 101 | 1  | 0.944879389258477   |   |
| MV_Schw | A | 12352 | 76  | 1  |                     | 1 |
| MV_Schw | A | 12353 | 17  | 0  |                     | 1 |
| MV_Schw | G | 12354 | 39  | 1  |                     | 1 |
| MV_Schw | A | 12355 | 12  | 0  |                     | 1 |
| MV_Schw | G | 12356 | 287 | 5  |                     | 1 |
| MV_Schw | G | 12357 | 37  | 0  |                     | 1 |
| MV_Schw | A | 12358 | 33  | 1  |                     | 1 |
| MV_Schw | C | 12359 | 205 | 4  |                     | 1 |
| MV_Schw | G | 12360 | 171 | 2  |                     | 1 |
| MV_Schw | A | 12361 | 47  | 0  |                     | 1 |
| MV_Schw | G | 12362 | 120 | 3  |                     | 1 |
| MV_Schw | G | 12363 | 295 | 2  | 0.305061614162072   |   |
| MV_Schw | G | 12364 | 74  | 1  |                     | 1 |
| MV_Schw | A | 12365 | 29  | 0  |                     | 1 |
| MV_Schw | C | 12366 | 161 | 1  | 0.78470776546672    |   |
| MV_Schw | T | 12367 | 167 | 1  | 0.788293646497135   |   |
| MV_Schw | G | 12368 | 266 | 7  |                     | 1 |
| MV_Schw | G | 12369 | 961 | 11 | 0.0834085699000277  |   |
| MV_Schw | C | 12370 | 922 | 7  | 0.00229612616991462 |   |
| MV_Schw | G | 12371 | 295 | 4  | 0.950262622850522   |   |
| MV_Schw | G | 12372 | 93  | 1  |                     | 1 |
| MV_Schw | C | 12373 | 107 | 0  | 0.380027812845055   |   |
| MV_Schw | A | 12374 | 37  | 1  |                     | 1 |
| MV_Schw | T | 12375 | 8   | 0  |                     | 1 |
| MV_Schw | T | 12376 | 21  | 1  |                     | 1 |
| MV_Schw | C | 12377 | 16  | 0  |                     | 1 |
| MV_Schw | C | 12378 | 116 | 3  |                     | 1 |
| MV_Schw | T | 12379 | 14  | 1  | 0.944879389258477   |   |
| MV_Schw | C | 12380 | 126 | 1  |                     | 1 |
| MV_Schw | A | 12381 | 17  | 0  |                     | 1 |
| MV_Schw | T | 12382 | 48  | 0  | 0.950262622850522   |   |

|         |   |       |     |   |                    |   |
|---------|---|-------|-----|---|--------------------|---|
| MV_Schw | G | 12383 | 29  | 0 |                    | 1 |
| MV_Schw | G | 12384 | 29  | 0 |                    | 1 |
| MV_Schw | A | 12385 | 4   | 0 |                    | 1 |
| MV_Schw | C | 12386 | 140 | 1 | 0.542247232322076  |   |
| MV_Schw | A | 12387 | 10  | 0 |                    | 1 |
| MV_Schw | G | 12388 | 91  | 1 |                    | 1 |
| MV_Schw | G | 12389 | 74  | 0 | 0.795198078226602  |   |
| MV_Schw | C | 12390 | 10  | 0 |                    | 1 |
| MV_Schw | A | 12391 | 68  | 0 | 0.789229943133706  |   |
| MV_Schw | T | 12392 | 10  | 0 |                    | 1 |
| MV_Schw | A | 12393 | 37  | 0 |                    | 1 |
| MV_Schw | T | 12394 | 8   | 0 |                    | 1 |
| MV_Schw | T | 12395 | 6   | 0 |                    | 1 |
| MV_Schw | A | 12396 | 29  | 0 |                    | 1 |
| MV_Schw | T | 12397 | 23  | 0 |                    | 1 |
| MV_Schw | A | 12398 | 35  | 0 |                    | 1 |
| MV_Schw | G | 12399 | 211 | 1 | 0.445919862395878  |   |
| MV_Schw | T | 12400 | 4   | 0 |                    | 1 |
| MV_Schw | A | 12401 | 14  | 0 |                    | 1 |
| MV_Schw | C | 12402 | 107 | 2 |                    | 1 |
| MV_Schw | C | 12403 | 70  | 1 |                    | 1 |
| MV_Schw | T | 12404 | 93  | 1 |                    | 1 |
| MV_Schw | A | 12405 | 74  | 1 |                    | 1 |
| MV_Schw | G | 12406 | 217 | 0 | 0.0324730952235072 |   |
| MV_Schw | G | 12407 | 314 | 1 | 0.0199422832389014 |   |
| MV_Schw | G | 12408 | 112 | 3 |                    | 1 |
| MV_Schw | C | 12409 | 349 | 3 | 0.490209449039103  |   |
| MV_Schw | A | 12410 | 50  | 1 |                    | 1 |
| MV_Schw | G | 12411 | 101 | 0 | 0.51781700540984   |   |
| MV_Schw | C | 12412 | 118 | 1 | 0.789229943133706  |   |
| MV_Schw | T | 12413 | 66  | 1 |                    | 1 |
| MV_Schw | C | 12414 | 103 | 1 | 0.944879389258477  |   |
| MV_Schw | A | 12415 | 215 | 1 | 0.453602847432754  |   |
| MV_Schw | T | 12416 | 70  | 1 |                    | 1 |
| MV_Schw | G | 12417 | 196 | 1 | 0.544375066438321  |   |
| MV_Schw | A | 12418 | 72  | 0 | 0.791667533131283  |   |

|         |   |       |     |   |                     |
|---------|---|-------|-----|---|---------------------|
| MV_Schw | A | 12419 | 29  | 0 | 1                   |
| MV_Schw | A | 12420 | 50  | 0 | 0.950262622850522   |
| MV_Schw | T | 12421 | 52  | 0 | 0.950262622850522   |
| MV_Schw | C | 12422 | 202 | 1 | 0.551026371204373   |
| MV_Schw | C | 12423 | 250 | 0 | 0.0109496584840517  |
| MV_Schw | T | 12424 | 10  | 1 | 0.822598489333375   |
| MV_Schw | G | 12425 | 258 | 1 | 0.239311637103656   |
| MV_Schw | G | 12426 | 244 | 1 | 0.302058122534159   |
| MV_Schw | A | 12427 | 35  | 0 | 1                   |
| MV_Schw | T | 12428 | 23  | 0 | 1                   |
| MV_Schw | C | 12429 | 19  | 0 | 1                   |
| MV_Schw | A | 12430 | 10  | 0 | 1                   |
| MV_Schw | T | 12431 | 21  | 1 | 1                   |
| MV_Schw | A | 12432 | 27  | 0 | 1                   |
| MV_Schw | G | 12433 | 165 | 1 | 0.786994490087255   |
| MV_Schw | T | 12434 | 17  | 0 | 1                   |
| MV_Schw | G | 12435 | 93  | 1 | 1                   |
| MV_Schw | T | 12436 | 4   | 0 | 1                   |
| MV_Schw | C | 12437 | 217 | 1 | 0.162995980324535   |
| MV_Schw | A | 12438 | 85  | 1 | 1                   |
| MV_Schw | C | 12439 | 200 | 1 | 0.215757612560076   |
| MV_Schw | A | 12440 | 16  | 0 | 1                   |
| MV_Schw | G | 12441 | 21  | 0 | 1                   |
| MV_Schw | G | 12442 | 56  | 0 | 0.950262622850522   |
| MV_Schw | G | 12443 | 45  | 0 | 1                   |
| MV_Schw | G | 12444 | 89  | 0 | 0.497615650989996   |
| MV_Schw | C | 12445 | 87  | 1 | 1                   |
| MV_Schw | A | 12446 | 99  | 1 | 0.944879389258477   |
| MV_Schw | A | 12447 | 116 | 1 | 1                   |
| MV_Schw | G | 12448 | 114 | 0 | 0.395791012435089   |
| MV_Schw | A | 12449 | 79  | 1 | 1                   |
| MV_Schw | G | 12450 | 68  | 0 | 0.789229943133706   |
| MV_Schw | A | 12451 | 10  | 0 | 1                   |
| MV_Schw | G | 12452 | 430 | 1 | 0.00535602334512521 |
| MV_Schw | T | 12453 | 16  | 0 | 1                   |
| MV_Schw | C | 12454 | 97  | 1 | 0.944879389258477   |

|         |   |       |     |    |                   |   |
|---------|---|-------|-----|----|-------------------|---|
| MV_Schw | T | 12455 | 39  | 0  |                   | 1 |
| MV_Schw | A | 12456 | 151 | 1  | 0.553693656798976 |   |
| MV_Schw | T | 12457 | 116 | 1  | 0.789229943133706 |   |
| MV_Schw | T | 12458 | 182 | 2  | 0.946416176064202 |   |
| MV_Schw | G | 12459 | 70  | 0  | 0.789229943133706 |   |
| MV_Schw | C | 12460 | 452 | 6  | 0.715462436038866 |   |
| MV_Schw | A | 12461 | 8   | 1  | 0.789229943133706 |   |
| MV_Schw | G | 12462 | 481 | 14 | 0.57780206681461  |   |
| MV_Schw | G | 12463 | 60  | 0  | 0.957721317456694 |   |
| MV_Schw | C | 12464 | 70  | 1  |                   | 1 |
| MV_Schw | A | 12465 | 56  | 2  | 0.968890372475178 |   |
| MV_Schw | T | 12466 | 19  | 0  |                   | 1 |
| MV_Schw | G | 12467 | 382 | 5  | 0.94331577055384  |   |
| MV_Schw | C | 12468 | 60  | 1  |                   | 1 |
| MV_Schw | T | 12469 | 74  | 2  |                   | 1 |
| MV_Schw | G | 12470 | 176 | 5  |                   | 1 |
| MV_Schw | G | 12471 | 180 | 5  | 0.814096743847571 |   |
| MV_Schw | A | 12472 | 12  | 0  |                   | 1 |
| MV_Schw | T | 12473 | 105 | 1  |                   | 1 |
| MV_Schw | A | 12474 | 4   | 0  |                   | 1 |
| MV_Schw | C | 12475 | 12  | 1  | 0.88950624150852  |   |
| MV_Schw | C | 12476 | 50  | 1  |                   | 1 |
| MV_Schw | A | 12477 | 23  | 0  |                   | 1 |
| MV_Schw | C | 12478 | 306 | 2  | 0.244450551107091 |   |
| MV_Schw | A | 12479 | 14  | 0  |                   | 1 |
| MV_Schw | A | 12480 | 35  | 1  | 0.863499923807603 |   |
| MV_Schw | A | 12481 | 23  | 0  |                   | 1 |
| MV_Schw | A | 12482 | 43  | 0  |                   | 1 |
| MV_Schw | G | 12483 | 145 | 1  | 0.88950624150852  |   |
| MV_Schw | G | 12484 | 14  | 0  |                   | 1 |
| MV_Schw | C | 12485 | 184 | 1  | 0.653463094391213 |   |
| MV_Schw | T | 12486 | 47  | 1  |                   | 1 |
| MV_Schw | T | 12487 | 8   | 0  |                   | 1 |
| MV_Schw | G | 12488 | 87  | 0  | 0.653463094391213 |   |
| MV_Schw | A | 12489 | 48  | 1  |                   | 1 |
| MV_Schw | T | 12490 | 29  | 0  |                   | 1 |

|         |   |       |     |   |                    |   |
|---------|---|-------|-----|---|--------------------|---|
| MV_Schw | T | 12491 | 16  | 0 |                    | 1 |
| MV_Schw | C | 12492 | 41  | 1 |                    | 1 |
| MV_Schw | G | 12493 | 27  | 0 |                    | 1 |
| MV_Schw | A | 12494 | 47  | 1 |                    | 1 |
| MV_Schw | G | 12495 | 709 | 7 | 0.141049492085993  |   |
| MV_Schw | C | 12496 | 101 | 1 | 0.944879389258477  |   |
| MV_Schw | C | 12497 | 10  | 0 |                    | 1 |
| MV_Schw | A | 12498 | 17  | 0 |                    | 1 |
| MV_Schw | G | 12499 | 70  | 0 | 0.789229943133706  |   |
| MV_Schw | C | 12500 | 238 | 4 |                    | 1 |
| MV_Schw | A | 12501 | 17  | 0 |                    | 1 |
| MV_Schw | T | 12502 | 35  | 0 |                    | 1 |
| MV_Schw | G | 12503 | 83  | 2 |                    | 1 |
| MV_Schw | A | 12504 | 10  | 0 |                    | 1 |
| MV_Schw | G | 12505 | 300 | 3 | 0.751501025978229  |   |
| MV_Schw | G | 12506 | 91  | 0 | 0.497615650989996  |   |
| MV_Schw | A | 12507 | 72  | 1 |                    | 1 |
| MV_Schw | A | 12508 | 29  | 0 |                    | 1 |
| MV_Schw | G | 12509 | 300 | 3 | 0.422936221821337  |   |
| MV_Schw | G | 12510 | 202 | 1 | 0.216853413677777  |   |
| MV_Schw | G | 12511 | 126 | 0 | 0.305061614162072  |   |
| MV_Schw | G | 12512 | 83  | 1 |                    | 1 |
| MV_Schw | G | 12513 | 120 | 1 | 0.789229943133706  |   |
| MV_Schw | G | 12514 | 314 | 2 | 0.191041649732459  |   |
| MV_Schw | G | 12515 | 533 | 3 | 0.0080978818750764 |   |
| MV_Schw | T | 12516 | 48  | 1 |                    | 1 |
| MV_Schw | T | 12517 | 12  | 0 |                    | 1 |
| MV_Schw | A | 12518 | 48  | 0 | 0.950262622850522  |   |
| MV_Schw | A | 12519 | 2   | 0 |                    | 1 |
| MV_Schw | C | 12520 | 39  | 1 |                    | 1 |
| MV_Schw | C | 12521 | 93  | 1 |                    | 1 |
| MV_Schw | T | 12522 | 35  | 0 |                    | 1 |
| MV_Schw | C | 12523 | 149 | 0 | 0.164331455962041  |   |
| MV_Schw | T | 12524 | 31  | 0 |                    | 1 |
| MV_Schw | C | 12525 | 118 | 0 | 0.296802961873227  |   |
| MV_Schw | G | 12526 | 244 | 1 | 0.0914030439943087 |   |

|         |   |       |     |   |                   |   |
|---------|---|-------|-----|---|-------------------|---|
| MV_Schw | A | 12527 | 35  | 0 |                   | 1 |
| MV_Schw | G | 12528 | 262 | 2 | 0.44055837109039  |   |
| MV_Schw | T | 12529 | 68  | 0 | 0.789229943133706 |   |
| MV_Schw | G | 12530 | 52  | 1 |                   | 1 |
| MV_Schw | A | 12531 | 8   | 0 |                   | 1 |
| MV_Schw | T | 12532 | 16  | 0 |                   | 1 |
| MV_Schw | A | 12533 | 124 | 1 |                   | 1 |
| MV_Schw | A | 12534 | 43  | 1 |                   | 1 |
| MV_Schw | C | 12535 | 151 | 1 | 0.553693656798976 |   |
| MV_Schw | C | 12536 | 47  | 0 |                   | 1 |
| MV_Schw | A | 12537 | 39  | 0 |                   | 1 |
| MV_Schw | G | 12538 | 109 | 1 |                   | 1 |
| MV_Schw | A | 12539 | 54  | 0 | 0.950262622850522 |   |
| MV_Schw | T | 12540 | 14  | 0 |                   | 1 |
| MV_Schw | T | 12541 | 6   | 0 |                   | 1 |
| MV_Schw | G | 12542 | 47  | 1 |                   | 1 |
| MV_Schw | T | 12543 | 19  | 0 |                   | 1 |
| MV_Schw | C | 12544 | 45  | 0 |                   | 1 |
| MV_Schw | C | 12545 | 120 | 2 |                   | 1 |
| MV_Schw | A | 12546 | 14  | 0 |                   | 1 |
| MV_Schw | A | 12547 | 4   | 0 |                   | 1 |
| MV_Schw | T | 12548 | 10  | 0 |                   | 1 |
| MV_Schw | T | 12549 | 8   | 0 |                   | 1 |
| MV_Schw | A | 12550 | 17  | 1 | 0.983041048229953 |   |
| MV_Schw | T | 12551 | 23  | 0 |                   | 1 |
| MV_Schw | G | 12552 | 23  | 1 |                   | 1 |
| MV_Schw | A | 12553 | 12  | 0 |                   | 1 |
| MV_Schw | C | 12554 | 76  | 0 | 0.638894311640422 |   |
| MV_Schw | T | 12555 | 8   | 0 |                   | 1 |
| MV_Schw | A | 12556 | 2   | 1 | 0.491835918445353 |   |
| MV_Schw | T | 12557 | 8   | 1 | 0.789229943133706 |   |
| MV_Schw | G | 12558 | 163 | 1 | 0.442454646177787 |   |
| MV_Schw | A | 12559 | 43  | 1 | 0.950262622850522 |   |
| MV_Schw | A | 12560 | 62  | 0 | 0.789229943133706 |   |
| MV_Schw | C | 12561 | 101 | 0 | 0.51781700540984  |   |
| MV_Schw | A | 12562 | 16  | 0 |                   | 1 |

|         |   |       |     |   |                   |   |
|---------|---|-------|-----|---|-------------------|---|
| MV_Schw | A | 12563 | 41  | 0 |                   | 1 |
| MV_Schw | T | 12564 | 70  | 1 |                   | 1 |
| MV_Schw | T | 12565 | 6   | 0 |                   | 1 |
| MV_Schw | C | 12566 | 93  | 1 |                   | 1 |
| MV_Schw | A | 12567 | 23  | 1 |                   | 1 |
| MV_Schw | G | 12568 | 300 | 3 | 0.751501025978229 |   |
| MV_Schw | A | 12569 | 68  | 0 | 0.789229943133706 |   |
| MV_Schw | G | 12570 | 41  | 1 |                   | 1 |
| MV_Schw | C | 12571 | 370 | 3 | 0.332639460884887 |   |
| MV_Schw | A | 12572 | 29  | 0 |                   | 1 |
| MV_Schw | G | 12573 | 99  | 1 | 0.944879389258477 |   |
| MV_Schw | G | 12574 | 151 | 2 |                   | 1 |
| MV_Schw | G | 12575 | 50  | 1 |                   | 1 |
| MV_Schw | A | 12576 | 8   | 1 | 0.789229943133706 |   |
| MV_Schw | T | 12577 | 60  | 0 | 0.957721317456694 |   |
| MV_Schw | G | 12578 | 52  | 1 |                   | 1 |
| MV_Schw | G | 12579 | 331 | 2 | 0.150659907408196 |   |
| MV_Schw | T | 12580 | 56  | 1 |                   | 1 |
| MV_Schw | G | 12581 | 167 | 1 | 0.341186273229673 |   |
| MV_Schw | C | 12582 | 145 | 0 | 0.161503851613234 |   |
| MV_Schw | T | 12583 | 31  | 0 |                   | 1 |
| MV_Schw | A | 12584 | 202 | 2 | 0.822598489333375 |   |
| MV_Schw | T | 12585 | 62  | 0 | 0.789229943133706 |   |
| MV_Schw | T | 12586 | 91  | 0 | 0.497615650989996 |   |
| MV_Schw | G | 12587 | 78  | 3 | 0.491835918445353 |   |
| MV_Schw | A | 12588 | 8   | 0 |                   | 1 |
| MV_Schw | C | 12589 | 399 | 5 | 0.828798787294197 |   |
| MV_Schw | A | 12590 | 52  | 2 | 0.78354985902497  |   |
| MV_Schw | G | 12591 | 157 | 3 |                   | 1 |
| MV_Schw | G | 12592 | 227 | 3 | 0.88950624150852  |   |
| MV_Schw | A | 12593 | 103 | 0 | 0.37877131423274  |   |
| MV_Schw | A | 12594 | 43  | 2 | 0.632968068765344 |   |
| MV_Schw | G | 12595 | 145 | 1 | 0.544375066438321 |   |
| MV_Schw | A | 12596 | 21  | 0 |                   | 1 |
| MV_Schw | A | 12597 | 39  | 0 |                   | 1 |
| MV_Schw | A | 12598 | 64  | 1 |                   | 1 |

|         |   |       |     |   |                     |
|---------|---|-------|-----|---|---------------------|
| MV_Schw | G | 12599 | 647 | 4 | 0.00744242912026753 |
| MV_Schw | A | 12600 | 4   | 0 | 1                   |
| MV_Schw | G | 12601 | 438 | 2 | 0.016883608592996   |
| MV_Schw | A | 12602 | 31  | 0 | 1                   |
| MV_Schw | A | 12603 | 43  | 0 | 1                   |
| MV_Schw | A | 12604 | 17  | 2 | 0.190596323698557   |
| MV_Schw | T | 12605 | 25  | 0 | 1                   |
| MV_Schw | G | 12606 | 95  | 0 | 0.499662168427985   |
| MV_Schw | T | 12607 | 35  | 0 | 1                   |
| MV_Schw | C | 12608 | 54  | 0 | 0.950262622850522   |
| MV_Schw | C | 12609 | 124 | 1 | 0.791667533131283   |
| MV_Schw | T | 12610 | 12  | 0 | 1                   |
| MV_Schw | C | 12611 | 64  | 0 | 0.789229943133706   |
| MV_Schw | A | 12612 | 50  | 0 | 0.950262622850522   |
| MV_Schw | T | 12613 | 29  | 0 | 1                   |
| MV_Schw | T | 12614 | 56  | 1 | 1                   |
| MV_Schw | G | 12615 | 103 | 1 | 0.944879389258477   |
| MV_Schw | A | 12616 | 12  | 0 | 1                   |
| MV_Schw | C | 12617 | 289 | 3 | 0.499662168427985   |
| MV_Schw | A | 12618 | 60  | 0 | 0.957721317456694   |
| MV_Schw | A | 12619 | 17  | 0 | 1                   |
| MV_Schw | A | 12620 | 14  | 0 | 1                   |
| MV_Schw | G | 12621 | 91  | 1 | 1                   |
| MV_Schw | A | 12622 | 14  | 0 | 1                   |
| MV_Schw | G | 12623 | 291 | 1 | 0.0263398139691685  |
| MV_Schw | T | 12624 | 6   | 0 | 1                   |
| MV_Schw | C | 12625 | 45  | 0 | 1                   |
| MV_Schw | A | 12626 | 31  | 1 | 1                   |
| MV_Schw | T | 12627 | 25  | 0 | 1                   |
| MV_Schw | G | 12628 | 581 | 5 | 0.138544864328202   |
| MV_Schw | T | 12629 | 21  | 0 | 1                   |
| MV_Schw | T | 12630 | 8   | 0 | 1                   |
| MV_Schw | C | 12631 | 52  | 0 | 0.950262622850522   |
| MV_Schw | A | 12632 | 66  | 0 | 0.789229943133706   |
| MV_Schw | G | 12633 | 190 | 1 | 0.282444566862733   |
| MV_Schw | T | 12634 | 68  | 1 | 1                   |



|         |   |       |     |   |                     |   |
|---------|---|-------|-----|---|---------------------|---|
| MV_Schw | G | 12635 | 29  | 1 |                     | 1 |
| MV_Schw | C | 12636 | 93  | 1 |                     | 1 |
| MV_Schw | A | 12637 | 12  | 0 |                     | 1 |
| MV_Schw | G | 12638 | 97  | 1 |                     | 1 |
| MV_Schw | C | 12639 | 140 | 2 |                     | 1 |
| MV_Schw | T | 12640 | 8   | 0 |                     | 1 |
| MV_Schw | G | 12641 | 136 | 3 |                     | 1 |
| MV_Schw | G | 12642 | 229 | 3 |                     | 1 |
| MV_Schw | C | 12643 | 401 | 4 | 0.37877131423274    |   |
| MV_Schw | G | 12644 | 213 | 2 | 0.73548636006501    |   |
| MV_Schw | A | 12645 | 29  | 0 |                     | 1 |
| MV_Schw | G | 12646 | 136 | 2 |                     | 1 |
| MV_Schw | A | 12647 | 17  | 0 |                     | 1 |
| MV_Schw | G | 12648 | 39  | 0 |                     | 1 |
| MV_Schw | C | 12649 | 145 | 1 | 0.544375066438321   |   |
| MV_Schw | T | 12650 | 16  | 0 |                     | 1 |
| MV_Schw | C | 12651 | 79  | 1 |                     | 1 |
| MV_Schw | T | 12652 | 151 | 4 |                     | 1 |
| MV_Schw | A | 12653 | 76  | 1 |                     | 1 |
| MV_Schw | A | 12654 | 72  | 1 |                     | 1 |
| MV_Schw | G | 12655 | 184 | 1 | 0.653463094391213   |   |
| MV_Schw | A | 12656 | 37  | 1 |                     | 1 |
| MV_Schw | A | 12657 | 16  | 0 |                     | 1 |
| MV_Schw | G | 12658 | 209 | 3 |                     | 1 |
| MV_Schw | C | 12659 | 66  | 0 | 0.789229943133706   |   |
| MV_Schw | C | 12660 | 58  | 0 | 0.953489044526869   |   |
| MV_Schw | A | 12661 | 12  | 1 | 0.88950624150852    |   |
| MV_Schw | T | 12662 | 39  | 1 | 0.9314909603024     |   |
| MV_Schw | A | 12663 | 41  | 1 |                     | 1 |
| MV_Schw | T | 12664 | 21  | 0 |                     | 1 |
| MV_Schw | G | 12665 | 48  | 1 |                     | 1 |
| MV_Schw | T | 12666 | 10  | 0 |                     | 1 |
| MV_Schw | G | 12667 | 95  | 1 |                     | 1 |
| MV_Schw | G | 12668 | 498 | 2 | 0.00509568937883065 |   |
| MV_Schw | G | 12669 | 269 | 1 | 0.0493136923590554  |   |
| MV_Schw | C | 12670 | 124 | 3 |                     | 1 |

|         |   |       |     |   |                      |
|---------|---|-------|-----|---|----------------------|
| MV_Schw | G | 12671 | 114 | 0 | 0.395791012435089    |
| MV_Schw | A | 12672 | 10  | 0 | 1                    |
| MV_Schw | G | 12673 | 151 | 0 | 0.166500460032885    |
| MV_Schw | G | 12674 | 430 | 3 | 0.152199178790049    |
| MV_Schw | C | 12675 | 89  | 1 | 1                    |
| MV_Schw | T | 12676 | 14  | 0 | 1                    |
| MV_Schw | A | 12677 | 21  | 0 | 1                    |
| MV_Schw | G | 12678 | 107 | 1 | 0.945767847051808    |
| MV_Schw | C | 12679 | 163 | 1 | 0.785635770321324    |
| MV_Schw | T | 12680 | 116 | 0 | 0.296710762771661    |
| MV_Schw | C | 12681 | 357 | 2 | 0.0898153680528284   |
| MV_Schw | G | 12682 | 62  | 0 | 0.789229943133706    |
| MV_Schw | A | 12683 | 41  | 1 | 1                    |
| MV_Schw | G | 12684 | 333 | 1 | 0.0460676776565913   |
| MV_Schw | G | 12685 | 159 | 3 | 1                    |
| MV_Schw | A | 12686 | 19  | 0 | 1                    |
| MV_Schw | C | 12687 | 43  | 0 | 1                    |
| MV_Schw | G | 12688 | 120 | 1 | 0.789229943133706    |
| MV_Schw | G | 12689 | 128 | 1 | 0.658415249679101    |
| MV_Schw | C | 12690 | 47  | 0 | 1                    |
| MV_Schw | C | 12691 | 33  | 1 | 0.822598489333375    |
| MV_Schw | T | 12692 | 21  | 0 | 1                    |
| MV_Schw | A | 12693 | 50  | 0 | 0.950262622850522    |
| MV_Schw | T | 12694 | 6   | 0 | 1                    |
| MV_Schw | T | 12695 | 12  | 0 | 1                    |
| MV_Schw | T | 12696 | 41  | 0 | 1                    |
| MV_Schw | A | 12697 | 45  | 0 | 1                    |
| MV_Schw | C | 12698 | 116 | 0 | 0.296710762771661    |
| MV_Schw | G | 12699 | 169 | 0 | 0.0850400511116103   |
| MV_Schw | G | 12700 | 31  | 1 | 1                    |
| MV_Schw | C | 12701 | 161 | 0 | 0.119516505590852    |
| MV_Schw | C | 12702 | 89  | 1 | 1                    |
| MV_Schw | T | 12703 | 21  | 0 | 1                    |
| MV_Schw | T | 12704 | 39  | 0 | 1                    |
| MV_Schw | G | 12705 | 428 | 1 | 0.000886598205683316 |
| MV_Schw | A | 12706 | 50  | 0 | 0.950262622850522    |

|         |   |       |     |   |                     |   |
|---------|---|-------|-----|---|---------------------|---|
| MV_Schw | G | 12707 | 85  | 1 |                     | 1 |
| MV_Schw | G | 12708 | 101 | 0 | 0.51781700540984    |   |
| MV_Schw | T | 12709 | 4   | 0 |                     | 1 |
| MV_Schw | C | 12710 | 200 | 1 | 0.549697051814019   |   |
| MV_Schw | C | 12711 | 45  | 1 |                     | 1 |
| MV_Schw | C | 12712 | 273 | 3 | 0.944879389258477   |   |
| MV_Schw | T | 12713 | 56  | 1 |                     | 1 |
| MV_Schw | G | 12714 | 211 | 1 | 0.161253917348926   |   |
| MV_Schw | A | 12715 | 31  | 1 |                     | 1 |
| MV_Schw | T | 12716 | 60  | 1 |                     | 1 |
| MV_Schw | G | 12717 | 25  | 0 |                     | 1 |
| MV_Schw | T | 12718 | 10  | 0 |                     | 1 |
| MV_Schw | A | 12719 | 10  | 0 |                     | 1 |
| MV_Schw | C | 12720 | 312 | 3 | 0.647007014396193   |   |
| MV_Schw | T | 12721 | 64  | 0 | 0.789229943133706   |   |
| MV_Schw | A | 12722 | 39  | 1 | 0.9314909603024     |   |
| MV_Schw | G | 12723 | 157 | 1 | 0.436962346550212   |   |
| MV_Schw | A | 12724 | 19  | 0 |                     | 1 |
| MV_Schw | A | 12725 | 56  | 0 | 0.950262622850522   |   |
| MV_Schw | T | 12726 | 10  | 0 |                     | 1 |
| MV_Schw | C | 12727 | 60  | 0 | 0.957721317456694   |   |
| MV_Schw | T | 12728 | 25  | 0 |                     | 1 |
| MV_Schw | A | 12729 | 8   | 0 |                     | 1 |
| MV_Schw | T | 12730 | 217 | 1 | 0.355607115956135   |   |
| MV_Schw | G | 12731 | 184 | 1 | 0.653463094391213   |   |
| MV_Schw | C | 12732 | 141 | 0 | 0.235179608025014   |   |
| MV_Schw | G | 12733 | 138 | 3 |                     | 1 |
| MV_Schw | A | 12734 | 17  | 0 |                     | 1 |
| MV_Schw | G | 12735 | 609 | 5 | 0.090192830807046   |   |
| MV_Schw | G | 12736 | 116 | 1 |                     | 1 |
| MV_Schw | C | 12737 | 213 | 4 |                     | 1 |
| MV_Schw | C | 12738 | 58  | 1 |                     | 1 |
| MV_Schw | A | 12739 | 12  | 0 |                     | 1 |
| MV_Schw | C | 12740 | 293 | 0 | 0.00374831899291936 |   |
| MV_Schw | C | 12741 | 112 | 1 | 0.789229943133706   |   |
| MV_Schw | T | 12742 | 12  | 2 | 0.0975104748468945  |   |

|         |   |       |     |   |                   |   |
|---------|---|-------|-----|---|-------------------|---|
| MV_Schw | T | 12743 | 23  | 0 |                   | 1 |
| MV_Schw | A | 12744 | 78  | 1 |                   | 1 |
| MV_Schw | T | 12745 | 87  | 0 | 0.653463094391213 |   |
| MV_Schw | T | 12746 | 91  | 1 |                   | 1 |
| MV_Schw | C | 12747 | 141 | 1 | 0.989441011726102 |   |
| MV_Schw | G | 12748 | 153 | 2 |                   | 1 |
| MV_Schw | G | 12749 | 48  | 1 |                   | 1 |
| MV_Schw | C | 12750 | 484 | 5 | 0.259624814115061 |   |
| MV_Schw | G | 12751 | 302 | 3 | 0.752394317790241 |   |
| MV_Schw | T | 12752 | 39  | 0 |                   | 1 |
| MV_Schw | C | 12753 | 52  | 0 | 0.950262622850522 |   |
| MV_Schw | A | 12754 | 31  | 0 |                   | 1 |
| MV_Schw | T | 12755 | 41  | 1 |                   | 1 |
| MV_Schw | G | 12756 | 151 | 0 | 0.166500460032885 |   |
| MV_Schw | A | 12757 | 10  | 0 |                   | 1 |
| MV_Schw | G | 12758 | 95  | 1 |                   | 1 |
| MV_Schw | A | 12759 | 4   | 0 |                   | 1 |
| MV_Schw | C | 12760 | 47  | 0 |                   | 1 |
| MV_Schw | A | 12761 | 16  | 0 |                   | 1 |
| MV_Schw | T | 12762 | 8   | 1 | 0.789229943133706 |   |
| MV_Schw | G | 12763 | 93  | 1 |                   | 1 |
| MV_Schw | T | 12764 | 12  | 0 |                   | 1 |
| MV_Schw | G | 12765 | 182 | 2 | 0.946416176064202 |   |
| MV_Schw | T | 12766 | 6   | 0 |                   | 1 |
| MV_Schw | C | 12767 | 58  | 1 |                   | 1 |
| MV_Schw | A | 12768 | 52  | 0 | 0.950262622850522 |   |
| MV_Schw | T | 12769 | 29  | 1 |                   | 1 |
| MV_Schw | C | 12770 | 97  | 1 |                   | 1 |
| MV_Schw | T | 12771 | 83  | 1 |                   | 1 |
| MV_Schw | G | 12772 | 81  | 1 |                   | 1 |
| MV_Schw | C | 12773 | 182 | 1 | 0.65158773158174  |   |
| MV_Schw | G | 12774 | 233 | 1 | 0.296710762771661 |   |
| MV_Schw | A | 12775 | 27  | 1 |                   | 1 |
| MV_Schw | G | 12776 | 176 | 3 |                   | 1 |
| MV_Schw | T | 12777 | 50  | 0 | 0.950262622850522 |   |
| MV_Schw | G | 12778 | 68  | 1 |                   | 1 |

|         |   |       |     |   |                    |   |
|---------|---|-------|-----|---|--------------------|---|
| MV_Schw | T | 12779 | 16  | 0 |                    | 1 |
| MV_Schw | G | 12780 | 225 | 1 | 0.120869955174813  |   |
| MV_Schw | G | 12781 | 153 | 2 |                    | 1 |
| MV_Schw | A | 12782 | 70  | 1 |                    | 1 |
| MV_Schw | T | 12783 | 60  | 0 | 0.957721317456694  |   |
| MV_Schw | C | 12784 | 114 | 3 |                    | 1 |
| MV_Schw | A | 12785 | 23  | 0 |                    | 1 |
| MV_Schw | G | 12786 | 401 | 4 | 0.37877131423274   |   |
| MV_Schw | T | 12787 | 12  | 1 | 0.88950624150852   |   |
| MV_Schw | C | 12788 | 264 | 2 | 0.44280652126772   |   |
| MV_Schw | A | 12789 | 25  | 1 |                    | 1 |
| MV_Schw | A | 12790 | 17  | 0 |                    | 1 |
| MV_Schw | C | 12791 | 279 | 5 |                    | 1 |
| MV_Schw | T | 12792 | 70  | 1 |                    | 1 |
| MV_Schw | A | 12793 | 12  | 1 | 0.88950624150852   |   |
| MV_Schw | C | 12794 | 64  | 1 |                    | 1 |
| MV_Schw | G | 12795 | 21  | 1 | 0.632968068765344  |   |
| MV_Schw | G | 12796 | 128 | 0 | 0.307480793677112  |   |
| MV_Schw | A | 12797 | 29  | 1 | 0.789229943133706  |   |
| MV_Schw | T | 12798 | 35  | 0 |                    | 1 |
| MV_Schw | G | 12799 | 66  | 1 |                    | 1 |
| MV_Schw | G | 12800 | 234 | 2 | 0.638894311640422  |   |
| MV_Schw | T | 12801 | 21  | 0 |                    | 1 |
| MV_Schw | T | 12802 | 39  | 0 |                    | 1 |
| MV_Schw | T | 12803 | 37  | 0 |                    | 1 |
| MV_Schw | T | 12804 | 45  | 0 |                    | 1 |
| MV_Schw | T | 12805 | 93  | 0 | 0.498091317793217  |   |
| MV_Schw | T | 12806 | 124 | 0 | 0.301343438464672  |   |
| MV_Schw | G | 12807 | 496 | 3 | 0.0196251329614518 |   |
| MV_Schw | T | 12808 | 4   | 0 |                    | 1 |
| MV_Schw | C | 12809 | 25  | 0 |                    | 1 |
| MV_Schw | C | 12810 | 27  | 1 |                    | 1 |
| MV_Schw | C | 12811 | 157 | 1 | 0.88950624150852   |   |
| MV_Schw | C | 12812 | 262 | 1 | 0.069912848140492  |   |
| MV_Schw | T | 12813 | 85  | 1 |                    | 1 |
| MV_Schw | C | 12814 | 163 | 1 | 0.442454646177787  |   |

|         |    |       |     |   |                   |
|---------|----|-------|-----|---|-------------------|
| MV_Schw | G  | 12815 | 151 | 1 | 0.553693656798976 |
| MV_Schw | G  | 12816 | 41  | 0 | 1                 |
| MV_Schw | G  | 12817 | 126 | 1 | 1                 |
| MV_Schw | T  | 12818 | 14  | 0 | 1                 |
| MV_Schw | T  | 12819 | 31  | 2 | 0.428411386231373 |
| MV_Schw | G  | 12820 | 107 | 1 | 0.945767847051808 |
| MV_Schw | C  | 12821 | 37  | 0 | 1                 |
| MV_Schw | C  | 12822 | 107 | 1 | 1                 |
| MV_Schw | A  | 12823 | 105 | 1 | 1                 |
| MV_Schw | A  | 12824 | 27  | 1 | 1                 |
| MV_Schw | C  | 12825 | 151 | 0 | 0.166500460032885 |
| MV_Schw | T  | 12826 | 16  | 0 | 1                 |
| MV_Schw | G  | 12827 | 83  | 1 | 1                 |
| MV_Schw | G  | 12828 | 52  | 0 | 0.950262622850522 |
| MV_Schw | A  | 12829 | 31  | 1 | 1                 |
| MV_Schw | T  | 12830 | 37  | 0 | 1                 |
| MV_Schw | G  | 12831 | 25  | 0 | 1                 |
| MV_Schw | NA | 12832 | 0   | 0 | NA                |
| MV_Schw | T  | 12833 | 45  | 0 | 1                 |
| MV_Schw | A  | 12834 | 14  | 0 | 1                 |
| MV_Schw | T  | 12835 | 64  | 1 | 1                 |
| MV_Schw | T  | 12836 | 66  | 1 | 1                 |
| MV_Schw | G  | 12837 | 50  | 0 | 0.950262622850522 |
| MV_Schw | A  | 12838 | 12  | 0 | 1                 |
| MV_Schw | C  | 12839 | 203 | 2 | 0.822598489333375 |
| MV_Schw | A  | 12840 | 66  | 1 | 1                 |
| MV_Schw | A  | 12841 | 17  | 0 | 1                 |
| MV_Schw | G  | 12842 | 151 | 2 | 1                 |
| MV_Schw | G  | 12843 | 116 | 1 | 1                 |
| MV_Schw | A  | 12844 | 25  | 1 | 1                 |
| MV_Schw | A  | 12845 | 27  | 1 | 1                 |
| MV_Schw | A  | 12846 | 4   | 0 | 1                 |
| MV_Schw | C  | 12847 | 161 | 1 | 0.78470776546672  |
| MV_Schw | A  | 12848 | 23  | 1 | 0.658415249679101 |
| MV_Schw | T  | 12849 | 12  | 0 | 1                 |
| MV_Schw | C  | 12850 | 29  | 0 | 1                 |

|         |    |       |     |   |                     |
|---------|----|-------|-----|---|---------------------|
| MV_Schw | A  | 12851 | 17  | 0 | 1                   |
| MV_Schw | T  | 12852 | 8   | 0 | 1                   |
| MV_Schw | C  | 12853 | 19  | 0 | 1                   |
| MV_Schw | C  | 12854 | 172 | 1 | 0.342651296301386   |
| MV_Schw | T  | 12855 | 29  | 0 | 1                   |
| MV_Schw | T  | 12856 | 43  | 0 | 1                   |
| MV_Schw | G  | 12857 | 345 | 1 | 0.00709066072995961 |
| MV_Schw | A  | 12858 | 31  | 1 | 1                   |
| MV_Schw | G  | 12859 | 140 | 1 | 0.986363032184908   |
| MV_Schw | A  | 12860 | 10  | 0 | 1                   |
| MV_Schw | G  | 12861 | 41  | 1 | 0.945767847051808   |
| MV_Schw | NA | 12862 | 0   | 0 | NA                  |
| MV_Schw | C  | 12863 | 267 | 0 | 0.00780532454818942 |
| MV_Schw | C  | 12864 | 178 | 2 | 0.945767847051808   |
| MV_Schw | C  | 12865 | 298 | 3 | 0.506554058853276   |
| MV_Schw | A  | 12866 | 89  | 0 | 0.497615650989996   |
| MV_Schw | T  | 12867 | 27  | 1 | 1                   |
| MV_Schw | A  | 12868 | 16  | 1 | 0.950262622850522   |
| MV_Schw | T  | 12869 | 10  | 0 | 1                   |
| MV_Schw | A  | 12870 | 138 | 1 | 0.673422966374487   |
| MV_Schw | T  | 12871 | 12  | 0 | 1                   |
| MV_Schw | T  | 12872 | 39  | 1 | 0.9314909603024     |
| MV_Schw | G  | 12873 | 66  | 0 | 0.789229943133706   |
| MV_Schw | G  | 12874 | 157 | 1 | 0.88950624150852    |
| MV_Schw | T  | 12875 | 35  | 0 | 1                   |
| MV_Schw | T  | 12876 | 23  | 0 | 1                   |
| MV_Schw | C  | 12877 | 110 | 1 | 0.789229943133706   |
| MV_Schw | T  | 12878 | 17  | 0 | 1                   |
| MV_Schw | A  | 12879 | 12  | 0 | 1                   |
| MV_Schw | C  | 12880 | 124 | 2 | 1                   |
| MV_Schw | C  | 12881 | 159 | 0 | 0.118907467124559   |
| MV_Schw | A  | 12882 | 4   | 0 | 1                   |
| MV_Schw | C  | 12883 | 52  | 0 | 0.950262622850522   |
| MV_Schw | T  | 12884 | 50  | 0 | 0.950262622850522   |
| MV_Schw | G  | 12885 | 50  | 0 | 0.950262622850522   |
| MV_Schw | A  | 12886 | 8   | 0 | 1                   |

|         |    |       |     |   |                      |    |
|---------|----|-------|-----|---|----------------------|----|
| MV_Schw | T  | 12887 | 27  | 0 |                      | 1  |
| MV_Schw | G  | 12888 | 78  | 1 |                      | 1  |
| MV_Schw | A  | 12889 | 50  | 0 | 0.950262622850522    |    |
| MV_Schw | G  | 12890 | 70  | 0 | 0.789229943133706    |    |
| MV_Schw | A  | 12891 | 23  | 0 |                      | 1  |
| MV_Schw | G  | 12892 | 124 | 2 |                      | 1  |
| MV_Schw | A  | 12893 | 23  | 0 |                      | 1  |
| MV_Schw | A  | 12894 | 31  | 0 |                      | 1  |
| MV_Schw | C  | 12895 | 359 | 0 | 0.000592673955321161 |    |
| MV_Schw | A  | 12896 | 8   | 0 |                      | 1  |
| MV_Schw | G  | 12897 | 33  | 0 |                      | 1  |
| MV_Schw | A  | 12898 | 4   | 0 |                      | 1  |
| MV_Schw | C  | 12899 | 76  | 1 |                      | 1  |
| MV_Schw | A  | 12900 | 33  | 1 | 0.822598489333375    |    |
| MV_Schw | T  | 12901 | 45  | 1 |                      | 1  |
| MV_Schw | G  | 12902 | 52  | 0 | 0.950262622850522    |    |
| MV_Schw | NA | 12903 | 0   | 0 |                      | NA |
| MV_Schw | A  | 12904 | 17  | 0 |                      | 1  |
| MV_Schw | G  | 12905 | 43  | 0 |                      | 1  |
| MV_Schw | C  | 12906 | 83  | 0 | 0.645428736569362    |    |
| MV_Schw | T  | 12907 | 23  | 0 |                      | 1  |
| MV_Schw | T  | 12908 | 16  | 0 |                      | 1  |
| MV_Schw | G  | 12909 | 62  | 1 |                      | 1  |
| MV_Schw | C  | 12910 | 176 | 1 | 0.648224297390367    |    |
| MV_Schw | C  | 12911 | 58  | 1 |                      | 1  |
| MV_Schw | T  | 12912 | 54  | 0 | 0.950262622850522    |    |
| MV_Schw | T  | 12913 | 21  | 0 |                      | 1  |
| MV_Schw | C  | 12914 | 37  | 0 |                      | 1  |
| MV_Schw | G  | 12915 | 382 | 3 | 0.286632305354263    |    |
| MV_Schw | T  | 12916 | 81  | 1 |                      | 1  |
| MV_Schw | A  | 12917 | 205 | 3 |                      | 1  |
| MV_Schw | A  | 12918 | 33  | 0 |                      | 1  |
| MV_Schw | G  | 12919 | 99  | 1 | 0.944879389258477    |    |
| MV_Schw | A  | 12920 | 35  | 0 |                      | 1  |
| MV_Schw | G  | 12921 | 105 | 1 | 0.944944073306986    |    |
| MV_Schw | C  | 12922 | 39  | 0 |                      | 1  |



|         |   |       |     |                      |
|---------|---|-------|-----|----------------------|
| MV_Schw | C | 12923 | 380 | 0.000272518955931449 |
| MV_Schw | C | 12924 | 33  | 0                    |
| MV_Schw | C | 12925 | 97  | 0.503192867159235    |
| MV_Schw | A | 12926 | 136 | 1.0983041048229953   |
| MV_Schw | A | 12927 | 54  | 0.950262622850522    |
| MV_Schw | G | 12928 | 426 | 2.00226023994581542  |
| MV_Schw | T | 12929 | 58  | 0.953489044526869    |
| MV_Schw | C | 12930 | 43  | 0                    |
| MV_Schw | G | 12931 | 25  | 0                    |
| MV_Schw | A | 12932 | 17  | 0                    |
| MV_Schw | T | 12933 | 50  | 1                    |
| MV_Schw | C | 12934 | 29  | 0                    |
| MV_Schw | C | 12935 | 35  | 1                    |
| MV_Schw | T | 12936 | 138 | 0.022714633168584    |
| MV_Schw | T | 12937 | 14  | 0                    |
| MV_Schw | G | 12938 | 326 | 1.0062565132117356   |
| MV_Schw | C | 12939 | 45  | 0                    |
| MV_Schw | G | 12940 | 68  | 1                    |
| MV_Schw | A | 12941 | 16  | 0                    |
| MV_Schw | T | 12942 | 27  | 0                    |
| MV_Schw | C | 12943 | 74  | 0.0795198078226602   |
| MV_Schw | T | 12944 | 23  | 0                    |
| MV_Schw | G | 12945 | 29  | 1                    |
| MV_Schw | C | 12946 | 56  | 1                    |
| MV_Schw | T | 12947 | 25  | 0                    |
| MV_Schw | G | 12948 | 103 | 1                    |
| MV_Schw | T | 12949 | 10  | 0                    |
| MV_Schw | T | 12950 | 25  | 0                    |
| MV_Schw | A | 12951 | 8   | 0                    |
| MV_Schw | G | 12952 | 50  | 1                    |
| MV_Schw | A | 12953 | 10  | 0                    |
| MV_Schw | A | 12954 | 21  | 0                    |
| MV_Schw | T | 12955 | 62  | 1                    |
| MV_Schw | A | 12956 | 6   | 0                    |
| MV_Schw | G | 12957 | 85  | 2                    |
| MV_Schw | C | 12958 | 295 | 1.00263929889117958  |

|         |   |       |     |   |                   |   |
|---------|---|-------|-----|---|-------------------|---|
| MV_Schw | A | 12959 | 74  | 1 |                   | 1 |
| MV_Schw | A | 12960 | 23  | 0 |                   | 1 |
| MV_Schw | C | 12961 | 35  | 0 |                   | 1 |
| MV_Schw | A | 12962 | 45  | 1 |                   | 1 |
| MV_Schw | G | 12963 | 29  | 0 |                   | 1 |
| MV_Schw | T | 12964 | 16  | 0 |                   | 1 |
| MV_Schw | G | 12965 | 85  | 0 | 0.648224297390367 |   |
| MV_Schw | T | 12966 | 17  | 0 |                   | 1 |
| MV_Schw | A | 12967 | 17  | 0 |                   | 1 |
| MV_Schw | C | 12968 | 165 | 1 | 0.444605338381727 |   |
| MV_Schw | T | 12969 | 21  | 0 |                   | 1 |
| MV_Schw | C | 12970 | 184 | 1 | 0.277229700444564 |   |
| MV_Schw | A | 12971 | 103 | 2 |                   | 1 |
| MV_Schw | T | 12972 | 97  | 1 | 0.944879389258477 |   |
| MV_Schw | G | 12973 | 174 | 1 | 0.344829637188882 |   |
| MV_Schw | G | 12974 | 89  | 0 | 0.497615650989996 |   |
| MV_Schw | G | 12975 | 50  | 0 | 0.950262622850522 |   |
| MV_Schw | C | 12976 | 149 | 2 |                   | 1 |
| MV_Schw | T | 12977 | 39  | 0 |                   | 1 |
| MV_Schw | T | 12978 | 37  | 1 |                   | 1 |
| MV_Schw | A | 12979 | 56  | 1 |                   | 1 |
| MV_Schw | C | 12980 | 306 | 1 | 0.081259384624919 |   |
| MV_Schw | G | 12981 | 97  | 1 | 0.944879389258477 |   |
| MV_Schw | G | 12982 | 128 | 0 | 0.307480793677112 |   |
| MV_Schw | T | 12983 | 52  | 0 | 0.950262622850522 |   |
| MV_Schw | G | 12984 | 91  | 0 | 0.497615650989996 |   |
| MV_Schw | A | 12985 | 35  | 0 |                   | 1 |
| MV_Schw | T | 12986 | 153 | 1 | 0.436311974989592 |   |
| MV_Schw | G | 12987 | 118 | 1 |                   | 1 |
| MV_Schw | A | 12988 | 10  | 1 | 0.822598489333375 |   |
| MV_Schw | T | 12989 | 33  | 0 |                   | 1 |
| MV_Schw | G | 12990 | 130 | 0 | 0.222002676269896 |   |
| MV_Schw | A | 12991 | 16  | 0 |                   | 1 |
| MV_Schw | T | 12992 | 52  | 1 |                   | 1 |
| MV_Schw | A | 12993 | 37  | 0 |                   | 1 |
| MV_Schw | G | 12994 | 52  | 1 |                   | 1 |

|         |    |       |     |   |                      |
|---------|----|-------|-----|---|----------------------|
| MV_Schw | C  | 12995 | 58  | 0 | 0.953489044526869    |
| MV_Schw | T  | 12996 | 6   | 0 | 1                    |
| MV_Schw | C  | 12997 | 762 | 4 | 0.000729299306293862 |
| MV_Schw | T  | 12998 | 66  | 1 | 1                    |
| MV_Schw | T  | 12999 | 41  | 0 | 1                    |
| MV_Schw | G  | 13000 | 43  | 2 | 0.632968068765344    |
| MV_Schw | G  | 13001 | 110 | 0 | 0.385864542883514    |
| MV_Schw | A  | 13002 | 109 | 0 | 0.381672248067152    |
| MV_Schw | A  | 13003 | 43  | 1 | 1                    |
| MV_Schw | C  | 13004 | 140 | 1 | 0.986363032184908    |
| MV_Schw | G  | 13005 | 64  | 0 | 0.789229943133706    |
| MV_Schw | A  | 13006 | 19  | 0 | 1                    |
| MV_Schw | A  | 13007 | 39  | 0 | 1                    |
| MV_Schw | G  | 13008 | 157 | 0 | 0.118807954027477    |
| MV_Schw | C  | 13009 | 240 | 2 | 0.527491093089607    |
| MV_Schw | C  | 13010 | 93  | 1 | 1                    |
| MV_Schw | T  | 13011 | 50  | 0 | 0.950262622850522    |
| MV_Schw | G  | 13012 | 58  | 0 | 0.953489044526869    |
| MV_Schw | G  | 13013 | 178 | 1 | 0.648224297390367    |
| MV_Schw | T  | 13014 | 27  | 0 | 1                    |
| MV_Schw | T  | 13015 | 17  | 0 | 1                    |
| MV_Schw | G  | 13016 | 114 | 0 | 0.395791012435089    |
| MV_Schw | NA | 13017 | 0   | 0 | NA                   |
| MV_Schw | T  | 13018 | 17  | 1 | 0.983041048229953    |
| MV_Schw | G  | 13019 | 81  | 1 | 1                    |
| MV_Schw | G  | 13020 | 110 | 1 | 1                    |
| MV_Schw | C  | 13021 | 31  | 0 | 1                    |
| MV_Schw | T  | 13022 | 23  | 0 | 1                    |
| MV_Schw | A  | 13023 | 29  | 0 | 1                    |
| MV_Schw | G  | 13024 | 78  | 1 | 1                    |
| MV_Schw | G  | 13025 | 39  | 0 | 1                    |
| MV_Schw | C  | 13026 | 434 | 1 | 0.000920302878117562 |
| MV_Schw | A  | 13027 | 43  | 0 | 1                    |
| MV_Schw | A  | 13028 | 8   | 0 | 1                    |
| MV_Schw | A  | 13029 | 27  | 1 | 1                    |
| MV_Schw | G  | 13030 | 56  | 1 | 1                    |

|         |   |       |     |   |                     |   |
|---------|---|-------|-----|---|---------------------|---|
| MV_Schw | G | 13031 | 167 | 2 |                     | 1 |
| MV_Schw | G | 13032 | 172 | 1 | 0.342651296301386   |   |
| MV_Schw | C | 13033 | 97  | 0 | 0.503192867159235   |   |
| MV_Schw | C | 13034 | 27  | 0 |                     | 1 |
| MV_Schw | A | 13035 | 25  | 0 |                     | 1 |
| MV_Schw | A | 13036 | 14  | 0 |                     | 1 |
| MV_Schw | T | 13037 | 17  | 0 |                     | 1 |
| MV_Schw | G | 13038 | 95  | 0 | 0.499662168427985   |   |
| MV_Schw | T | 13039 | 116 | 1 | 0.789229943133706   |   |
| MV_Schw | G | 13040 | 14  | 0 |                     | 1 |
| MV_Schw | A | 13041 | 10  | 0 |                     | 1 |
| MV_Schw | G | 13042 | 287 | 1 | 0.0368535484835669  |   |
| MV_Schw | C | 13043 | 78  | 0 | 0.638894311640422   |   |
| MV_Schw | C | 13044 | 70  | 1 |                     | 1 |
| MV_Schw | T | 13045 | 27  | 0 |                     | 1 |
| MV_Schw | G | 13046 | 236 | 0 | 0.0156200863386463  |   |
| MV_Schw | G | 13047 | 130 | 1 | 0.658415249679101   |   |
| MV_Schw | A | 13048 | 120 | 1 | 0.789229943133706   |   |
| MV_Schw | G | 13049 | 130 | 1 | 0.983041048229953   |   |
| MV_Schw | G | 13050 | 45  | 0 |                     | 1 |
| MV_Schw | A | 13051 | 21  | 0 |                     | 1 |
| MV_Schw | G | 13052 | 118 | 2 |                     | 1 |
| MV_Schw | C | 13053 | 171 | 2 |                     | 1 |
| MV_Schw | T | 13054 | 64  | 1 |                     | 1 |
| MV_Schw | A | 13055 | 25  | 0 |                     | 1 |
| MV_Schw | A | 13056 | 56  | 1 |                     | 1 |
| MV_Schw | G | 13057 | 669 | 3 | 0.00155948632495435 |   |
| MV_Schw | G | 13058 | 105 | 0 | 0.37877131423274    |   |
| MV_Schw | G | 13059 | 287 | 1 | 0.0368535484835669  |   |
| MV_Schw | T | 13060 | 62  | 1 |                     | 1 |
| MV_Schw | G | 13061 | 209 | 2 | 0.734151152837751   |   |
| MV_Schw | A | 13062 | 124 | 2 |                     | 1 |
| MV_Schw | T | 13063 | 262 | 2 | 0.44055837109039    |   |
| MV_Schw | C | 13064 | 302 | 1 | 0.0278312919914174  |   |
| MV_Schw | A | 13065 | 54  | 0 | 0.950262622850522   |   |
| MV_Schw | C | 13066 | 345 | 3 | 0.237817203872315   |   |

|         |    |       |     |   |                   |
|---------|----|-------|-----|---|-------------------|
| MV_Schw | T  | 13067 | 78  | 0 | 0.638894311640422 |
| MV_Schw | C  | 13068 | 380 | 3 | 0.152844714515976 |
| MV_Schw | C  | 13069 | 99  | 1 | 0.944879389258477 |
| MV_Schw | C  | 13070 | 27  | 0 | 1                 |
| MV_Schw | A  | 13071 | 50  | 1 | 1                 |
| MV_Schw | T  | 13072 | 50  | 0 | 0.950262622850522 |
| MV_Schw | C  | 13073 | 114 | 1 | 0.789229943133706 |
| MV_Schw | T  | 13074 | 29  | 0 | 1                 |
| MV_Schw | C  | 13075 | 14  | 0 | 1                 |
| MV_Schw | A  | 13076 | 8   | 0 | 1                 |
| MV_Schw | A  | 13077 | 21  | 0 | 1                 |
| MV_Schw | C  | 13078 | 66  | 0 | 0.789229943133706 |
| MV_Schw | T  | 13079 | 21  | 0 | 1                 |
| MV_Schw | T  | 13080 | 8   | 0 | 1                 |
| MV_Schw | C  | 13081 | 19  | 0 | 1                 |
| MV_Schw | G  | 13082 | 39  | 3 | 0.273798916014578 |
| MV_Schw | A  | 13083 | 70  | 1 | 1                 |
| MV_Schw | C  | 13084 | 316 | 1 | 0.060993248324147 |
| MV_Schw | T  | 13085 | 12  | 0 | 1                 |
| MV_Schw | NA | 13086 | 0   | 0 | NA                |
| MV_Schw | A  | 13087 | 25  | 0 | 1                 |
| MV_Schw | T  | 13088 | 23  | 0 | 1                 |
| MV_Schw | T  | 13089 | 83  | 1 | 1                 |
| MV_Schw | T  | 13090 | 54  | 0 | 0.950262622850522 |
| MV_Schw | A  | 13091 | 99  | 1 | 0.944879389258477 |
| MV_Schw | G  | 13092 | 35  | 0 | 1                 |
| MV_Schw | C  | 13093 | 153 | 0 | 0.169696698380260 |
| MV_Schw | G  | 13094 | 43  | 1 | 1                 |
| MV_Schw | C  | 13095 | 97  | 1 | 0.944879389258477 |
| MV_Schw | A  | 13096 | 27  | 0 | 1                 |
| MV_Schw | T  | 13097 | 19  | 0 | 1                 |
| MV_Schw | NA | 13098 | 0   | 0 | NA                |
| MV_Schw | G  | 13099 | 47  | 0 | 1                 |
| MV_Schw | G  | 13100 | 79  | 0 | 0.639207655977387 |
| MV_Schw | T  | 13101 | 6   | 0 | 1                 |
| MV_Schw | T  | 13102 | 21  | 0 | 1                 |

|         |   |       |     |   |                    |   |
|---------|---|-------|-----|---|--------------------|---|
| MV_Schw | G | 13103 | 221 | 0 | 0.0221567686996876 |   |
| MV_Schw | A | 13104 | 56  | 0 | 0.950262622850522  |   |
| MV_Schw | G | 13105 | 124 | 1 | 0.791667533131283  |   |
| MV_Schw | G | 13106 | 155 | 1 | 0.88950624150852   |   |
| MV_Schw | G | 13107 | 103 | 1 |                    | 1 |
| MV_Schw | A | 13108 | 19  | 0 |                    | 1 |
| MV_Schw | T | 13109 | 8   | 0 |                    | 1 |
| MV_Schw | C | 13110 | 141 | 0 | 0.235179608025014  |   |
| MV_Schw | G | 13111 | 467 | 3 | 0.0335249031960396 |   |
| MV_Schw | T | 13112 | 219 | 2 | 0.7433964722815    |   |
| MV_Schw | A | 13113 | 50  | 0 | 0.950262622850522  |   |
| MV_Schw | G | 13114 | 364 | 1 | 0.0259173140292866 |   |
| MV_Schw | C | 13115 | 19  | 0 |                    | 1 |
| MV_Schw | A | 13116 | 39  | 1 |                    | 1 |
| MV_Schw | C | 13117 | 192 | 0 | 0.0637677617687036 |   |
| MV_Schw | T | 13118 | 8   | 0 |                    | 1 |
| MV_Schw | C | 13119 | 12  | 0 |                    | 1 |
| MV_Schw | A | 13120 | 23  | 1 |                    | 1 |
| MV_Schw | A | 13121 | 21  | 0 |                    | 1 |
| MV_Schw | G | 13122 | 281 | 1 | 0.0358765704418588 |   |
| MV_Schw | T | 13123 | 10  | 0 |                    | 1 |
| MV_Schw | G | 13124 | 78  | 0 | 0.638894311640422  |   |
| MV_Schw | A | 13125 | 6   | 0 |                    | 1 |
| MV_Schw | A | 13126 | 16  | 0 |                    | 1 |
| MV_Schw | A | 13127 | 143 | 2 |                    | 1 |
| MV_Schw | T | 13128 | 74  | 0 | 0.795198078226602  |   |
| MV_Schw | A | 13129 | 4   | 0 |                    | 1 |
| MV_Schw | C | 13130 | 192 | 3 |                    | 1 |
| MV_Schw | T | 13131 | 14  | 1 | 0.944879389258477  |   |
| MV_Schw | C | 13132 | 190 | 1 | 0.542247232322076  |   |
| MV_Schw | A | 13133 | 76  | 0 | 0.638894311640422  |   |
| MV_Schw | G | 13134 | 91  | 1 |                    | 1 |
| MV_Schw | G | 13135 | 47  | 0 |                    | 1 |
| MV_Schw | T | 13136 | 8   | 0 |                    | 1 |
| MV_Schw | A | 13137 | 2   | 0 |                    | 1 |
| MV_Schw | C | 13138 | 17  | 0 |                    | 1 |

|         |   |       |     |   |                    |   |
|---------|---|-------|-----|---|--------------------|---|
| MV_Schw | A | 13139 | 16  | 0 |                    | 1 |
| MV_Schw | T | 13140 | 8   | 1 | 0.789229943133706  |   |
| MV_Schw | C | 13141 | 37  | 0 |                    | 1 |
| MV_Schw | C | 13142 | 66  | 1 |                    | 1 |
| MV_Schw | C | 13143 | 72  | 1 |                    | 1 |
| MV_Schw | T | 13144 | 10  | 0 |                    | 1 |
| MV_Schw | T | 13145 | 16  | 0 |                    | 1 |
| MV_Schw | G | 13146 | 103 | 1 | 0.944879389258477  |   |
| MV_Schw | T | 13147 | 14  | 0 |                    | 1 |
| MV_Schw | C | 13148 | 23  | 1 |                    | 1 |
| MV_Schw | C | 13149 | 153 | 1 | 0.436311974989592  |   |
| MV_Schw | G | 13150 | 16  | 0 |                    | 1 |
| MV_Schw | A | 13151 | 10  | 0 |                    | 1 |
| MV_Schw | G | 13152 | 105 | 1 | 0.944944073306986  |   |
| MV_Schw | T | 13153 | 10  | 0 |                    | 1 |
| MV_Schw | G | 13154 | 25  | 0 |                    | 1 |
| MV_Schw | G | 13155 | 130 | 1 | 0.658415249679101  |   |
| MV_Schw | C | 13156 | 27  | 1 |                    | 1 |
| MV_Schw | G | 13157 | 328 | 2 | 0.149304739712522  |   |
| MV_Schw | A | 13158 | 33  | 1 |                    | 1 |
| MV_Schw | G | 13159 | 194 | 2 | 0.822598489333375  |   |
| MV_Schw | G | 13160 | 159 | 2 |                    | 1 |
| MV_Schw | T | 13161 | 4   | 0 |                    | 1 |
| MV_Schw | A | 13162 | 72  | 0 | 0.791667533131283  |   |
| MV_Schw | T | 13163 | 17  | 1 | 0.983041048229953  |   |
| MV_Schw | A | 13164 | 64  | 0 | 0.789229943133706  |   |
| MV_Schw | C | 13165 | 329 | 1 | 0.0146738363101635 |   |
| MV_Schw | C | 13166 | 233 | 0 | 0.0235202211426643 |   |
| MV_Schw | A | 13167 | 27  | 0 |                    | 1 |
| MV_Schw | C | 13168 | 304 | 3 | 0.645428736569362  |   |
| MV_Schw | A | 13169 | 16  | 0 |                    | 1 |
| MV_Schw | A | 13170 | 190 | 3 |                    | 1 |
| MV_Schw | T | 13171 | 64  | 1 |                    | 1 |
| MV_Schw | C | 13172 | 58  | 1 |                    | 1 |
| MV_Schw | T | 13173 | 23  | 0 |                    | 1 |
| MV_Schw | C | 13174 | 68  | 1 |                    | 1 |

|         |    |       |     |   |                    |    |
|---------|----|-------|-----|---|--------------------|----|
| MV_Schw | C  | 13175 | 213 | 3 |                    | 1  |
| MV_Schw | A  | 13176 | 269 | 2 | 0.35554222034638   |    |
| MV_Schw | A  | 13177 | 16  | 0 |                    | 1  |
| MV_Schw | C  | 13178 | 254 | 0 | 0.0111350404952786 |    |
| MV_Schw | G  | 13179 | 14  | 0 |                    | 1  |
| MV_Schw | A  | 13180 | 2   | 0 |                    | 1  |
| MV_Schw | C  | 13181 | 54  | 0 | 0.950262622850522  |    |
| MV_Schw | A  | 13182 | 48  | 2 | 0.709032941865358  |    |
| MV_Schw | A  | 13183 | 4   | 0 |                    | 1  |
| MV_Schw | T  | 13184 | 6   | 0 |                    | 1  |
| MV_Schw | C  | 13185 | 35  | 1 |                    | 1  |
| MV_Schw | NA | 13186 | 0   | 0 |                    | NA |
| MV_Schw | C  | 13187 | 45  | 0 |                    | 1  |
| MV_Schw | T  | 13188 | 17  | 0 |                    | 1  |
| MV_Schw | C  | 13189 | 141 | 1 | 0.542247232322076  |    |
| MV_Schw | A  | 13190 | 16  | 0 |                    | 1  |
| MV_Schw | T  | 13191 | 17  | 0 |                    | 1  |
| MV_Schw | T  | 13192 | 10  | 0 |                    | 1  |
| MV_Schw | T  | 13193 | 25  | 0 |                    | 1  |
| MV_Schw | G  | 13194 | 62  | 0 | 0.789229943133706  |    |
| MV_Schw | T  | 13195 | 4   | 0 |                    | 1  |
| MV_Schw | C  | 13196 | 91  | 1 |                    | 1  |
| MV_Schw | A  | 13197 | 47  | 0 |                    | 1  |
| MV_Schw | T  | 13198 | 17  | 0 |                    | 1  |
| MV_Schw | A  | 13199 | 19  | 0 |                    | 1  |
| MV_Schw | T  | 13200 | 4   | 0 |                    | 1  |
| MV_Schw | C  | 13201 | 25  | 0 |                    | 1  |
| MV_Schw | A  | 13202 | 25  | 0 |                    | 1  |
| MV_Schw | G  | 13203 | 68  | 0 | 0.789229943133706  |    |
| MV_Schw | A  | 13204 | 21  | 0 |                    | 1  |
| MV_Schw | T  | 13205 | 66  | 0 | 0.789229943133706  |    |
| MV_Schw | A  | 13206 | 10  | 0 |                    | 1  |
| MV_Schw | A  | 13207 | 8   | 0 |                    | 1  |
| MV_Schw | G  | 13208 | 54  | 0 | 0.950262622850522  |    |
| MV_Schw | A  | 13209 | 10  | 0 |                    | 1  |
| MV_Schw | A  | 13210 | 14  | 0 |                    | 1  |



|         |   |       |     |   |                   |   |
|---------|---|-------|-----|---|-------------------|---|
| MV_Schw | G | 13211 | 31  | 0 |                   | 1 |
| MV_Schw | G | 13212 | 95  | 0 | 0.499662168427985 |   |
| MV_Schw | T | 13213 | 4   | 0 |                   | 1 |
| MV_Schw | T | 13214 | 12  | 0 |                   | 1 |
| MV_Schw | G | 13215 | 79  | 0 | 0.639207655977387 |   |
| MV_Schw | A | 13216 | 6   | 0 |                   | 1 |
| MV_Schw | T | 13217 | 29  | 0 |                   | 1 |
| MV_Schw | A | 13218 | 31  | 1 |                   | 1 |
| MV_Schw | C | 13219 | 17  | 0 |                   | 1 |
| MV_Schw | T | 13220 | 2   | 0 |                   | 1 |
| MV_Schw | A | 13221 | 8   | 0 |                   | 1 |
| MV_Schw | A | 13222 | 35  | 0 |                   | 1 |
| MV_Schw | C | 13223 | 229 | 3 | 0.88950624150852  |   |
| MV_Schw | T | 13224 | 14  | 0 |                   | 1 |
| MV_Schw | T | 13225 | 10  | 0 |                   | 1 |
| MV_Schw | T | 13226 | 48  | 0 | 0.950262622850522 |   |
| MV_Schw | A | 13227 | 14  | 0 |                   | 1 |
| MV_Schw | T | 13228 | 10  | 0 |                   | 1 |
| MV_Schw | A | 13229 | 14  | 0 |                   | 1 |
| MV_Schw | T | 13230 | 14  | 0 |                   | 1 |
| MV_Schw | A | 13231 | 2   | 0 |                   | 1 |
| MV_Schw | C | 13232 | 27  | 0 |                   | 1 |
| MV_Schw | C | 13233 | 50  | 0 | 0.950262622850522 |   |
| MV_Schw | A | 13234 | 14  | 0 |                   | 1 |
| MV_Schw | A | 13235 | 48  | 1 |                   | 1 |
| MV_Schw | C | 13236 | 99  | 0 | 0.509396577320122 |   |
| MV_Schw | A | 13237 | 58  | 1 |                   | 1 |
| MV_Schw | A | 13238 | 4   | 0 |                   | 1 |
| MV_Schw | G | 13239 | 64  | 0 | 0.789229943133706 |   |
| MV_Schw | G | 13240 | 66  | 1 |                   | 1 |
| MV_Schw | A | 13241 | 35  | 0 |                   | 1 |
| MV_Schw | A | 13242 | 8   | 0 |                   | 1 |
| MV_Schw | T | 13243 | 89  | 0 | 0.497615650989996 |   |
| MV_Schw | G | 13244 | 16  | 0 |                   | 1 |
| MV_Schw | C | 13245 | 35  | 1 |                   | 1 |
| MV_Schw | T | 13246 | 60  | 0 | 0.957721317456694 |   |

|         |   |       |     |   |                     |
|---------|---|-------|-----|---|---------------------|
| MV_Schw | T | 13247 | 72  | 0 | 0.791667533131283   |
| MV_Schw | C | 13248 | 347 | 1 | 0.00709075117762907 |
| MV_Schw | T | 13249 | 39  | 0 | 1                   |
| MV_Schw | A | 13250 | 21  | 1 | 0.632968068765344   |
| MV_Schw | G | 13251 | 50  | 1 | 1                   |
| MV_Schw | G | 13252 | 48  | 1 | 1                   |
| MV_Schw | G | 13253 | 190 | 1 | 0.282444566862733   |
| MV_Schw | T | 13254 | 14  | 0 | 1                   |
| MV_Schw | T | 13255 | 56  | 0 | 0.950262622850522   |
| MV_Schw | G | 13256 | 103 | 1 | 1                   |
| MV_Schw | G | 13257 | 23  | 1 | 1                   |
| MV_Schw | G | 13258 | 87  | 1 | 1                   |
| MV_Schw | T | 13259 | 8   | 0 | 1                   |
| MV_Schw | G | 13260 | 182 | 2 | 0.946416176064202   |
| MV_Schw | T | 13261 | 14  | 0 | 1                   |
| MV_Schw | T | 13262 | 114 | 1 | 1                   |
| MV_Schw | T | 13263 | 27  | 1 | 1                   |
| MV_Schw | T | 13264 | 143 | 3 | 1                   |
| MV_Schw | A | 13265 | 4   | 0 | 1                   |
| MV_Schw | G | 13266 | 293 | 2 | 0.302665612003202   |
| MV_Schw | A | 13267 | 62  | 1 | 1                   |
| MV_Schw | A | 13268 | 12  | 0 | 1                   |
| MV_Schw | A | 13269 | 4   | 0 | 1                   |
| MV_Schw | C | 13270 | 39  | 0 | 1                   |
| MV_Schw | A | 13271 | 58  | 0 | 0.953489044526869   |
| MV_Schw | T | 13272 | 2   | 0 | 1                   |
| MV_Schw | T | 13273 | 14  | 0 | 1                   |
| MV_Schw | G | 13274 | 70  | 1 | 1                   |
| MV_Schw | T | 13275 | 12  | 0 | 1                   |
| MV_Schw | T | 13276 | 47  | 0 | 1                   |
| MV_Schw | T | 13277 | 35  | 0 | 1                   |
| MV_Schw | C | 13278 | 10  | 0 | 1                   |
| MV_Schw | G | 13279 | 10  | 0 | 1                   |
| MV_Schw | A | 13280 | 14  | 0 | 1                   |
| MV_Schw | C | 13281 | 47  | 0 | 1                   |
| MV_Schw | T | 13282 | 6   | 0 | 1                   |

|         |   |       |     |   |                    |   |
|---------|---|-------|-----|---|--------------------|---|
| MV_Schw | C | 13283 | 14  | 0 |                    | 1 |
| MV_Schw | G | 13284 | 43  | 0 |                    | 1 |
| MV_Schw | A | 13285 | 10  | 0 |                    | 1 |
| MV_Schw | G | 13286 | 287 | 1 | 0.0368535484835669 |   |
| MV_Schw | A | 13287 | 23  | 0 |                    | 1 |
| MV_Schw | A | 13288 | 48  | 1 |                    | 1 |
| MV_Schw | A | 13289 | 8   | 0 |                    | 1 |
| MV_Schw | G | 13290 | 37  | 1 |                    | 1 |
| MV_Schw | A | 13291 | 21  | 0 |                    | 1 |
| MV_Schw | T | 13292 | 31  | 3 | 0.0518737301478137 |   |
| MV_Schw | A | 13293 | 47  | 2 | 0.678058690427187  |   |
| MV_Schw | C | 13294 | 151 | 2 |                    | 1 |
| MV_Schw | C | 13295 | 56  | 0 | 0.950262622850522  |   |
| MV_Schw | G | 13296 | 364 | 2 | 0.0919716715734722 |   |
| MV_Schw | G | 13297 | 165 | 1 | 0.786994490087255  |   |
| MV_Schw | A | 13298 | 41  | 0 |                    | 1 |
| MV_Schw | T | 13299 | 33  | 0 |                    | 1 |
| MV_Schw | C | 13300 | 29  | 1 |                    | 1 |
| MV_Schw | A | 13301 | 64  | 0 | 0.789229943133706  |   |
| MV_Schw | T | 13302 | 47  | 1 |                    | 1 |
| MV_Schw | C | 13303 | 194 | 3 |                    | 1 |
| MV_Schw | T | 13304 | 83  | 0 | 0.645428736569362  |   |
| MV_Schw | A | 13305 | 25  | 2 | 0.314611398059001  |   |
| MV_Schw | A | 13306 | 50  | 0 | 0.950262622850522  |   |
| MV_Schw | C | 13307 | 298 | 1 | 0.110724661200760  |   |
| MV_Schw | A | 13308 | 52  | 1 |                    | 1 |
| MV_Schw | C | 13309 | 93  | 1 |                    | 1 |
| MV_Schw | G | 13310 | 14  | 0 |                    | 1 |
| MV_Schw | G | 13311 | 43  | 0 |                    | 1 |
| MV_Schw | T | 13312 | 10  | 0 |                    | 1 |
| MV_Schw | A | 13313 | 52  | 0 | 0.950262622850522  |   |
| MV_Schw | T | 13314 | 37  | 0 |                    | 1 |
| MV_Schw | T | 13315 | 47  | 0 |                    | 1 |
| MV_Schw | A | 13316 | 4   | 0 |                    | 1 |
| MV_Schw | C | 13317 | 116 | 0 | 0.296710762771661  |   |
| MV_Schw | A | 13318 | 39  | 0 |                    | 1 |

|         |   |       |     |   |                      |   |
|---------|---|-------|-----|---|----------------------|---|
| MV_Schw | T | 13319 | 27  | 0 |                      | 1 |
| MV_Schw | C | 13320 | 45  | 0 |                      | 1 |
| MV_Schw | T | 13321 | 74  | 1 |                      | 1 |
| MV_Schw | T | 13322 | 19  | 0 |                      | 1 |
| MV_Schw | C | 13323 | 17  | 0 |                      | 1 |
| MV_Schw | A | 13324 | 58  | 0 | 0.953489044526869    |   |
| MV_Schw | C | 13325 | 87  | 1 |                      | 1 |
| MV_Schw | G | 13326 | 312 | 0 | 0.00278418782064866  |   |
| MV_Schw | T | 13327 | 39  | 0 |                      | 1 |
| MV_Schw | C | 13328 | 8   | 0 |                      | 1 |
| MV_Schw | G | 13329 | 29  | 0 |                      | 1 |
| MV_Schw | A | 13330 | 14  | 0 |                      | 1 |
| MV_Schw | A | 13331 | 21  | 0 |                      | 1 |
| MV_Schw | A | 13332 | 6   | 0 |                      | 1 |
| MV_Schw | C | 13333 | 79  | 0 | 0.639207655977387    |   |
| MV_Schw | A | 13334 | 8   | 0 |                      | 1 |
| MV_Schw | G | 13335 | 39  | 0 |                      | 1 |
| MV_Schw | A | 13336 | 29  | 0 |                      | 1 |
| MV_Schw | T | 13337 | 2   | 0 |                      | 1 |
| MV_Schw | T | 13338 | 21  | 1 |                      | 1 |
| MV_Schw | G | 13339 | 43  | 0 |                      | 1 |
| MV_Schw | T | 13340 | 19  | 0 |                      | 1 |
| MV_Schw | T | 13341 | 50  | 0 | 0.950262622850522    |   |
| MV_Schw | G | 13342 | 473 | 1 | 0.000314764319350838 |   |
| MV_Schw | C | 13343 | 112 | 0 | 0.390108970321283    |   |
| MV_Schw | G | 13344 | 176 | 0 | 0.0873173091778286   |   |
| MV_Schw | T | 13345 | 16  | 0 |                      | 1 |
| MV_Schw | G | 13346 | 72  | 3 | 0.42458526175556     |   |
| MV_Schw | A | 13347 | 27  | 0 |                      | 1 |
| MV_Schw | T | 13348 | 48  | 0 | 0.950262622850522    |   |
| MV_Schw | C | 13349 | 118 | 0 | 0.296802961873227    |   |
| MV_Schw | C | 13350 | 155 | 1 | 0.88950624150852     |   |
| MV_Schw | C | 13351 | 595 | 1 | 1.25903180054441e-05 |   |
| MV_Schw | G | 13352 | 91  | 0 | 0.497615650989996    |   |
| MV_Schw | A | 13353 | 79  | 1 |                      | 1 |
| MV_Schw | T | 13354 | 114 | 1 |                      | 1 |

|         |   |       |     |   |                   |
|---------|---|-------|-----|---|-------------------|
| MV_Schw | G | 13355 | 105 | 1 | 0.944944073306986 |
| MV_Schw | A | 13356 | 29  | 0 | 1                 |
| MV_Schw | T | 13357 | 12  | 1 | 0.88950624150852  |
| MV_Schw | A | 13358 | 62  | 1 | 1                 |
| MV_Schw | G | 13359 | 143 | 1 | 0.542465567021569 |
| MV_Schw | A | 13360 | 47  | 1 | 1                 |
| MV_Schw | T | 13361 | 29  | 1 | 1                 |
| MV_Schw | C | 13362 | 56  | 0 | 0.950262622850522 |
| MV_Schw | A | 13363 | 33  | 0 | 1                 |
| MV_Schw | T | 13364 | 101 | 1 | 0.944879389258477 |
| MV_Schw | C | 13365 | 101 | 1 | 0.944879389258477 |
| MV_Schw | C | 13366 | 444 | 5 | 0.616288514811243 |
| MV_Schw | C | 13367 | 141 | 1 | 0.989441011726102 |
| MV_Schw | A | 13368 | 122 | 0 | 0.298485329352986 |
| MV_Schw | G | 13369 | 285 | 5 | 1                 |
| MV_Schw | G | 13370 | 159 | 0 | 0.118907467124559 |
| MV_Schw | A | 13371 | 23  | 1 | 1                 |
| MV_Schw | T | 13372 | 33  | 0 | 1                 |
| MV_Schw | A | 13373 | 8   | 0 | 1                 |
| MV_Schw | C | 13374 | 234 | 1 | 0.125475779768559 |
| MV_Schw | C | 13375 | 64  | 0 | 0.789229943133706 |
| MV_Schw | C | 13376 | 58  | 1 | 1                 |
| MV_Schw | A | 13377 | 151 | 1 | 0.553693656798976 |
| MV_Schw | G | 13378 | 72  | 1 | 1                 |
| MV_Schw | C | 13379 | 143 | 0 | 0.161503851613234 |
| MV_Schw | T | 13380 | 14  | 0 | 1                 |
| MV_Schw | C | 13381 | 79  | 0 | 0.639207655977387 |
| MV_Schw | C | 13382 | 211 | 1 | 0.445919862395878 |
| MV_Schw | C | 13383 | 103 | 0 | 0.37877131423274  |
| MV_Schw | G | 13384 | 227 | 3 | 0.88950624150852  |
| MV_Schw | C | 13385 | 128 | 1 | 1                 |
| MV_Schw | A | 13386 | 45  | 0 | 1                 |
| MV_Schw | A | 13387 | 10  | 0 | 1                 |
| MV_Schw | G | 13388 | 52  | 0 | 0.950262622850522 |
| MV_Schw | C | 13389 | 43  | 1 | 1                 |
| MV_Schw | T | 13390 | 10  | 0 | 1                 |

|         |    |       |     |   |                    |
|---------|----|-------|-----|---|--------------------|
| MV_Schw | NA | 13391 | 0   | 0 | NA                 |
| MV_Schw | G  | 13392 | 21  | 0 | 1                  |
| MV_Schw | A  | 13393 | 8   | 0 | 1                  |
| MV_Schw | G  | 13394 | 41  | 0 | 1                  |
| MV_Schw | C  | 13395 | 37  | 0 | 1                  |
| MV_Schw | T  | 13396 | 39  | 1 | 1                  |
| MV_Schw | G  | 13397 | 23  | 1 | 1                  |
| MV_Schw | A  | 13398 | 23  | 0 | 1                  |
| MV_Schw | G  | 13399 | 384 | 1 | 0.0199822045623633 |
| MV_Schw | G  | 13400 | 130 | 1 | 0.658415249679101  |
| MV_Schw | G  | 13401 | 68  | 0 | 0.789229943133706  |
| MV_Schw | C  | 13402 | 107 | 1 | 0.945767847051808  |
| MV_Schw | A  | 13403 | 23  | 0 | 1                  |
| MV_Schw | G  | 13404 | 434 | 1 | 0.0054651270080729 |
| MV_Schw | A  | 13405 | 171 | 1 | 0.789229943133706  |
| MV_Schw | G  | 13406 | 254 | 1 | 0.236329415529751  |
| MV_Schw | C  | 13407 | 85  | 1 | 1                  |
| MV_Schw | T  | 13408 | 62  | 0 | 0.789229943133706  |
| MV_Schw | A  | 13409 | 138 | 0 | 0.22714633168584   |
| MV_Schw | T  | 13410 | 43  | 0 | 1                  |
| MV_Schw | G  | 13411 | 446 | 3 | 0.121677050932237  |
| MV_Schw | T  | 13412 | 105 | 1 | 0.944944073306986  |
| MV_Schw | A  | 13413 | 14  | 0 | 1                  |
| MV_Schw | C  | 13414 | 194 | 1 | 0.288870964410068  |
| MV_Schw | C  | 13415 | 112 | 0 | 0.390108970321283  |
| MV_Schw | A  | 13416 | 58  | 1 | 1                  |
| MV_Schw | A  | 13417 | 62  | 1 | 1                  |
| MV_Schw | C  | 13418 | 273 | 3 | 0.596471827524582  |
| MV_Schw | C  | 13419 | 23  | 0 | 1                  |
| MV_Schw | C  | 13420 | 134 | 0 | 0.222853068696264  |
| MV_Schw | A  | 13421 | 93  | 0 | 0.498091317793217  |
| MV_Schw | T  | 13422 | 109 | 2 | 1                  |
| MV_Schw | T  | 13423 | 43  | 1 | 1                  |
| MV_Schw | G  | 13424 | 76  | 0 | 0.638894311640422  |
| MV_Schw | A  | 13425 | 29  | 0 | 1                  |
| MV_Schw | T  | 13426 | 14  | 0 | 1                  |

|         |    |       |     |   |                      |    |
|---------|----|-------|-----|---|----------------------|----|
| MV_Schw | A  | 13427 | 81  | 1 |                      | 1  |
| MV_Schw | T  | 13428 | 31  | 0 |                      | 1  |
| MV_Schw | A  | 13429 | 25  | 0 |                      | 1  |
| MV_Schw | T  | 13430 | 566 | 7 | 0.395928232829604    |    |
| MV_Schw | G  | 13431 | 85  | 1 |                      | 1  |
| MV_Schw | A  | 13432 | 16  | 0 |                      | 1  |
| MV_Schw | T  | 13433 | 58  | 0 | 0.953489044526869    |    |
| MV_Schw | A  | 13434 | 14  | 0 |                      | 1  |
| MV_Schw | A  | 13435 | 41  | 0 |                      | 1  |
| MV_Schw | T  | 13436 | 79  | 0 | 0.639207655977387    |    |
| MV_Schw | G  | 13437 | 50  | 1 |                      | 1  |
| MV_Schw | C  | 13438 | 83  | 1 |                      | 1  |
| MV_Schw | A  | 13439 | 6   | 0 |                      | 1  |
| MV_Schw | C  | 13440 | 23  | 0 |                      | 1  |
| MV_Schw | C  | 13441 | 196 | 1 | 0.544375066438321    |    |
| MV_Schw | T  | 13442 | 14  | 1 | 0.944879389258477    |    |
| MV_Schw | NA | 13443 | 0   | 0 |                      | NA |
| MV_Schw | NA | 13444 | 0   | 0 |                      | NA |
| MV_Schw | A  | 13445 | 27  | 0 |                      | 1  |
| MV_Schw | A  | 13446 | 10  | 0 |                      | 1  |
| MV_Schw | T  | 13447 | 33  | 0 |                      | 1  |
| MV_Schw | T  | 13448 | 19  | 0 |                      | 1  |
| MV_Schw | G  | 13449 | 19  | 0 |                      | 1  |
| MV_Schw | A  | 13450 | 2   | 0 |                      | 1  |
| MV_Schw | C  | 13451 | 517 | 1 | 0.000755067663239603 |    |
| MV_Schw | A  | 13452 | 35  | 1 |                      | 1  |
| MV_Schw | G  | 13453 | 21  | 0 |                      | 1  |
| MV_Schw | A  | 13454 | 4   | 0 |                      | 1  |
| MV_Schw | G  | 13455 | 64  | 0 | 0.789229943133706    |    |
| MV_Schw | A  | 13456 | 68  | 3 | 0.806176178462968    |    |
| MV_Schw | T  | 13457 | 33  | 0 |                      | 1  |
| MV_Schw | G  | 13458 | 10  | 0 |                      | 1  |
| MV_Schw | C  | 13459 | 167 | 2 |                      | 1  |
| MV_Schw | A  | 13460 | 78  | 1 |                      | 1  |
| MV_Schw | A  | 13461 | 17  | 0 |                      | 1  |
| MV_Schw | C  | 13462 | 634 | 3 | 0.0039370380729923   |    |

|         |   |       |     |   |                   |   |
|---------|---|-------|-----|---|-------------------|---|
| MV_Schw | A | 13463 | 10  | 0 |                   | 1 |
| MV_Schw | A | 13464 | 76  | 1 |                   | 1 |
| MV_Schw | G | 13465 | 109 | 2 |                   | 1 |
| MV_Schw | G | 13466 | 145 | 1 | 0.544375066438321 |   |
| MV_Schw | C | 13467 | 70  | 1 |                   | 1 |
| MV_Schw | T | 13468 | 50  | 1 |                   | 1 |
| MV_Schw | A | 13469 | 70  | 1 |                   | 1 |
| MV_Schw | T | 13470 | 70  | 1 |                   | 1 |
| MV_Schw | A | 13471 | 29  | 0 |                   | 1 |
| MV_Schw | C | 13472 | 62  | 0 | 0.789229943133706 |   |
| MV_Schw | A | 13473 | 12  | 1 | 0.88950624150852  |   |
| MV_Schw | C | 13474 | 205 | 3 |                   | 1 |
| MV_Schw | C | 13475 | 114 | 1 | 0.789229943133706 |   |
| MV_Schw | C | 13476 | 453 | 5 | 0.355607115956135 |   |
| MV_Schw | A | 13477 | 145 | 2 |                   | 1 |
| MV_Schw | G | 13478 | 198 | 1 | 0.54661929710701  |   |
| MV_Schw | A | 13479 | 54  | 1 |                   | 1 |
| MV_Schw | G | 13480 | 118 | 1 | 0.789229943133706 |   |
| MV_Schw | C | 13481 | 6   | 0 |                   | 1 |
| MV_Schw | C | 13482 | 39  | 1 |                   | 1 |
| MV_Schw | A | 13483 | 97  | 1 | 0.944879389258477 |   |
| MV_Schw | T | 13484 | 52  | 1 |                   | 1 |
| MV_Schw | A | 13485 | 110 | 0 | 0.385864542883514 |   |
| MV_Schw | G | 13486 | 33  | 1 | 0.822598489333375 |   |
| MV_Schw | G | 13487 | 68  | 0 | 0.789229943133706 |   |
| MV_Schw | A | 13488 | 8   | 0 |                   | 1 |
| MV_Schw | G | 13489 | 136 | 0 | 0.224063006917908 |   |
| MV_Schw | G | 13490 | 29  | 0 |                   | 1 |
| MV_Schw | C | 13491 | 31  | 0 |                   | 1 |
| MV_Schw | A | 13492 | 33  | 0 |                   | 1 |
| MV_Schw | C | 13493 | 43  | 0 |                   | 1 |
| MV_Schw | C | 13494 | 41  | 0 |                   | 1 |
| MV_Schw | T | 13495 | 6   | 0 |                   | 1 |
| MV_Schw | T | 13496 | 14  | 0 |                   | 1 |
| MV_Schw | G | 13497 | 147 | 1 | 0.547090293958293 |   |
| MV_Schw | T | 13498 | 21  | 0 |                   | 1 |



|         |   |       |     |   |                      |
|---------|---|-------|-----|---|----------------------|
| MV_Schw | G | 13499 | 196 | 2 | 0.822598489333375    |
| MV_Schw | G | 13500 | 260 | 3 | 0.681693930547946    |
| MV_Schw | A | 13501 | 19  | 0 | 1                    |
| MV_Schw | A | 13502 | 68  | 1 | 1                    |
| MV_Schw | T | 13503 | 85  | 1 | 1                    |
| MV_Schw | T | 13504 | 35  | 0 | 1                    |
| MV_Schw | T | 13505 | 176 | 0 | 0.0873173091778286   |
| MV_Schw | G | 13506 | 217 | 3 | 0.957721317456694    |
| MV_Schw | T | 13507 | 112 | 1 | 0.789229943133706    |
| MV_Schw | T | 13508 | 186 | 0 | 0.0611551441006359   |
| MV_Schw | A | 13509 | 56  | 0 | 0.950262622850522    |
| MV_Schw | C | 13510 | 153 | 1 | 0.436311974989592    |
| MV_Schw | A | 13511 | 10  | 0 | 1                    |
| MV_Schw | T | 13512 | 16  | 0 | 1                    |
| MV_Schw | G | 13513 | 83  | 1 | 1                    |
| MV_Schw | G | 13514 | 74  | 0 | 0.795198078226602    |
| MV_Schw | T | 13515 | 39  | 0 | 1                    |
| MV_Schw | C | 13516 | 192 | 1 | 0.285482351071617    |
| MV_Schw | C | 13517 | 851 | 2 | 8.23219568062479e-07 |
| MV_Schw | A | 13518 | 16  | 0 | 1                    |
| MV_Schw | C | 13519 | 89  | 1 | 1                    |
| MV_Schw | A | 13520 | 64  | 0 | 0.789229943133706    |
| MV_Schw | C | 13521 | 93  | 1 | 1                    |
| MV_Schw | C | 13522 | 159 | 0 | 0.118907467124559    |
| MV_Schw | C | 13523 | 8   | 0 | 1                    |
| MV_Schw | C | 13524 | 326 | 1 | 0.0141787317264331   |
| MV_Schw | A | 13525 | 37  | 1 | 1                    |
| MV_Schw | A | 13526 | 58  | 0 | 0.953489044526869    |
| MV_Schw | C | 13527 | 240 | 2 | 0.527491093089607    |
| MV_Schw | T | 13528 | 12  | 0 | 1                    |
| MV_Schw | A | 13529 | 6   | 0 | 1                    |
| MV_Schw | T | 13530 | 4   | 0 | 1                    |
| MV_Schw | A | 13531 | 29  | 0 | 1                    |
| MV_Schw | T | 13532 | 33  | 0 | 1                    |
| MV_Schw | C | 13533 | 107 | 0 | 0.380027812845055    |
| MV_Schw | A | 13534 | 4   | 0 | 1                    |

|         |   |       |     |   |                    |   |
|---------|---|-------|-----|---|--------------------|---|
| MV_Schw | C | 13535 | 66  | 1 |                    | 1 |
| MV_Schw | A | 13536 | 54  | 0 | 0.950262622850522  |   |
| MV_Schw | T | 13537 | 76  | 1 |                    | 1 |
| MV_Schw | T | 13538 | 25  | 1 |                    | 1 |
| MV_Schw | T | 13539 | 10  | 0 |                    | 1 |
| MV_Schw | T | 13540 | 47  | 2 | 0.678058690427187  |   |
| MV_Schw | A | 13541 | 27  | 0 |                    | 1 |
| MV_Schw | G | 13542 | 347 | 3 | 0.486898392739685  |   |
| MV_Schw | C | 13543 | 52  | 1 |                    | 1 |
| MV_Schw | T | 13544 | 17  | 0 |                    | 1 |
| MV_Schw | A | 13545 | 6   | 0 |                    | 1 |
| MV_Schw | A | 13546 | 8   | 0 |                    | 1 |
| MV_Schw | G | 13547 | 281 | 4 |                    | 1 |
| MV_Schw | T | 13548 | 17  | 0 |                    | 1 |
| MV_Schw | C | 13549 | 60  | 1 |                    | 1 |
| MV_Schw | C | 13550 | 93  | 0 | 0.498091317793217  |   |
| MV_Schw | A | 13551 | 19  | 0 |                    | 1 |
| MV_Schw | C | 13552 | 254 | 1 | 0.236329415529751  |   |
| MV_Schw | A | 13553 | 103 | 0 | 0.37877131423274   |   |
| MV_Schw | G | 13554 | 240 | 0 | 0.0158394533614316 |   |
| MV_Schw | C | 13555 | 16  | 0 |                    | 1 |
| MV_Schw | A | 13556 | 6   | 0 |                    | 1 |
| MV_Schw | C | 13557 | 58  | 0 | 0.953489044526869  |   |
| MV_Schw | T | 13558 | 4   | 0 |                    | 1 |
| MV_Schw | A | 13559 | 25  | 0 |                    | 1 |
| MV_Schw | T | 13560 | 6   | 0 |                    | 1 |
| MV_Schw | C | 13561 | 118 | 0 | 0.296802961873227  |   |
| MV_Schw | T | 13562 | 43  | 0 |                    | 1 |
| MV_Schw | A | 13563 | 8   | 1 | 0.789229943133706  |   |
| MV_Schw | T | 13564 | 48  | 0 | 0.950262622850522  |   |
| MV_Schw | G | 13565 | 124 | 1 | 0.791667533131283  |   |
| MV_Schw | A | 13566 | 6   | 0 |                    | 1 |
| MV_Schw | T | 13567 | 16  | 0 |                    | 1 |
| MV_Schw | T | 13568 | 10  | 0 |                    | 1 |
| MV_Schw | G | 13569 | 66  | 1 |                    | 1 |
| MV_Schw | A | 13570 | 8   | 0 |                    | 1 |

|         |   |       |     |   |                    |   |
|---------|---|-------|-----|---|--------------------|---|
| MV_Schw | C | 13571 | 172 | 3 |                    | 1 |
| MV_Schw | C | 13572 | 140 | 1 | 0.542247232322076  |   |
| MV_Schw | T | 13573 | 50  | 1 |                    | 1 |
| MV_Schw | G | 13574 | 23  | 1 |                    | 1 |
| MV_Schw | G | 13575 | 72  | 1 |                    | 1 |
| MV_Schw | T | 13576 | 64  | 1 |                    | 1 |
| MV_Schw | A | 13577 | 39  | 1 |                    | 1 |
| MV_Schw | A | 13578 | 8   | 0 |                    | 1 |
| MV_Schw | C | 13579 | 298 | 2 | 0.239137755983385  |   |
| MV_Schw | A | 13580 | 35  | 1 |                    | 1 |
| MV_Schw | A | 13581 | 25  | 0 |                    | 1 |
| MV_Schw | A | 13582 | 16  | 0 |                    | 1 |
| MV_Schw | A | 13583 | 39  | 1 |                    | 1 |
| MV_Schw | T | 13584 | 27  | 0 |                    | 1 |
| MV_Schw | T | 13585 | 27  | 1 |                    | 1 |
| MV_Schw | T | 13586 | 48  | 1 |                    | 1 |
| MV_Schw | G | 13587 | 52  | 0 | 0.950262622850522  |   |
| MV_Schw | A | 13588 | 12  | 0 |                    | 1 |
| MV_Schw | G | 13589 | 368 | 2 | 0.0684127900022543 |   |
| MV_Schw | A | 13590 | 16  | 0 |                    | 1 |
| MV_Schw | A | 13591 | 6   | 0 |                    | 1 |
| MV_Schw | G | 13592 | 37  | 0 |                    | 1 |
| MV_Schw | G | 13593 | 68  | 2 |                    | 1 |
| MV_Schw | A | 13594 | 25  | 0 |                    | 1 |
| MV_Schw | C | 13595 | 93  | 1 |                    | 1 |
| MV_Schw | C | 13596 | 14  | 0 |                    | 1 |
| MV_Schw | A | 13597 | 39  | 1 |                    | 1 |
| MV_Schw | T | 13598 | 62  | 1 |                    | 1 |
| MV_Schw | A | 13599 | 14  | 1 | 0.944879389258477  |   |
| MV_Schw | T | 13600 | 2   | 0 |                    | 1 |
| MV_Schw | G | 13601 | 19  | 1 |                    | 1 |
| MV_Schw | A | 13602 | 0   | 0 |                    | 1 |
| MV_Schw | A | 13603 | 78  | 1 |                    | 1 |
| MV_Schw | T | 13604 | 157 | 4 |                    | 1 |
| MV_Schw | G | 13605 | 297 | 7 |                    | 1 |
| MV_Schw | A | 13606 | 17  | 0 |                    | 1 |

|         |    |       |     |   |                   |    |
|---------|----|-------|-----|---|-------------------|----|
| MV_Schw | A  | 13607 | 27  | 0 |                   | 1  |
| MV_Schw | A  | 13608 | 70  | 1 |                   | 1  |
| MV_Schw | T  | 13609 | 41  | 0 |                   | 1  |
| MV_Schw | T  | 13610 | 79  | 1 |                   | 1  |
| MV_Schw | T  | 13611 | 41  | 0 |                   | 1  |
| MV_Schw | C  | 13612 | 101 | 0 | 0.51781700540984  |    |
| MV_Schw | A  | 13613 | 79  | 0 | 0.639207655977387 |    |
| MV_Schw | G  | 13614 | 116 | 1 | 0.789229943133706 |    |
| MV_Schw | C  | 13615 | 48  | 0 | 0.950262622850522 |    |
| MV_Schw | T  | 13616 | 2   | 0 |                   | 1  |
| MV_Schw | C  | 13617 | 29  | 0 |                   | 1  |
| MV_Schw | NA | 13618 | 0   | 0 |                   | NA |
| MV_Schw | C  | 13619 | 33  | 1 | 0.822598489333375 |    |
| MV_Schw | A  | 13620 | 52  | 1 |                   | 1  |
| MV_Schw | T  | 13621 | 17  | 1 | 0.983041048229953 |    |
| MV_Schw | A  | 13622 | 29  | 1 | 0.789229943133706 |    |
| MV_Schw | G  | 13623 | 17  | 0 |                   | 1  |
| MV_Schw | G  | 13624 | 50  | 1 |                   | 1  |
| MV_Schw | G  | 13625 | 16  | 0 |                   | 1  |
| MV_Schw | G  | 13626 | 47  | 1 |                   | 1  |
| MV_Schw | A  | 13627 | 6   | 0 |                   | 1  |
| MV_Schw | T  | 13628 | 124 | 1 | 0.791667533131283 |    |
| MV_Schw | G  | 13629 | 219 | 1 | 0.164760602972146 |    |
| MV_Schw | A  | 13630 | 54  | 0 | 0.950262622850522 |    |
| MV_Schw | C  | 13631 | 194 | 2 | 0.822598489333375 |    |
| MV_Schw | G  | 13632 | 45  | 1 |                   | 1  |
| MV_Schw | A  | 13633 | 27  | 0 |                   | 1  |
| MV_Schw | T  | 13634 | 43  | 2 | 0.632968068765344 |    |
| MV_Schw | A  | 13635 | 37  | 0 |                   | 1  |
| MV_Schw | T  | 13636 | 6   | 0 |                   | 1  |
| MV_Schw | C  | 13637 | 47  | 0 |                   | 1  |
| MV_Schw | A  | 13638 | 19  | 0 |                   | 1  |
| MV_Schw | A  | 13639 | 41  | 0 |                   | 1  |
| MV_Schw | T  | 13640 | 54  | 0 | 0.950262622850522 |    |
| MV_Schw | A  | 13641 | 27  | 0 |                   | 1  |
| MV_Schw | G  | 13642 | 72  | 1 |                   | 1  |

|         |    |       |     |   |                     |    |
|---------|----|-------|-----|---|---------------------|----|
| MV_Schw | T  | 13643 | 8   | 0 |                     | 1  |
| MV_Schw | T  | 13644 | 33  | 1 |                     | 1  |
| MV_Schw | T  | 13645 | 136 | 2 |                     | 1  |
| MV_Schw | C  | 13646 | 58  | 1 |                     | 1  |
| MV_Schw | A  | 13647 | 14  | 0 |                     | 1  |
| MV_Schw | T  | 13648 | 6   | 0 |                     | 1  |
| MV_Schw | A  | 13649 | 16  | 0 |                     | 1  |
| MV_Schw | A  | 13650 | 8   | 0 |                     | 1  |
| MV_Schw | C  | 13651 | 128 | 1 |                     | 1  |
| MV_Schw | T  | 13652 | 58  | 0 | 0.953489044526869   |    |
| MV_Schw | G  | 13653 | 31  | 0 |                     | 1  |
| MV_Schw | A  | 13654 | 8   | 0 |                     | 1  |
| MV_Schw | G  | 13655 | 81  | 0 | 0.641186461810141   |    |
| MV_Schw | T  | 13656 | 2   | 0 |                     | 1  |
| MV_Schw | T  | 13657 | 14  | 1 | 0.944879389258477   |    |
| MV_Schw | T  | 13658 | 14  | 0 |                     | 1  |
| MV_Schw | C  | 13659 | 25  | 0 |                     | 1  |
| MV_Schw | T  | 13660 | 17  | 1 | 0.983041048229953   |    |
| MV_Schw | G  | 13661 | 209 | 3 |                     | 1  |
| MV_Schw | C  | 13662 | 124 | 2 |                     | 1  |
| MV_Schw | NA | 13663 | 0   | 0 |                     | NA |
| MV_Schw | C  | 13664 | 50  | 1 |                     | 1  |
| MV_Schw | A  | 13665 | 16  | 1 | 0.950262622850522   |    |
| MV_Schw | T  | 13666 | 41  | 1 |                     | 1  |
| MV_Schw | A  | 13667 | 16  | 1 | 0.950262622850522   |    |
| MV_Schw | G  | 13668 | 17  | 0 |                     | 1  |
| MV_Schw | A  | 13669 | 16  | 0 |                     | 1  |
| MV_Schw | G  | 13670 | 37  | 0 |                     | 1  |
| MV_Schw | C  | 13671 | 41  | 0 |                     | 1  |
| MV_Schw | C  | 13672 | 143 | 2 |                     | 1  |
| MV_Schw | A  | 13673 | 23  | 0 |                     | 1  |
| MV_Schw | A  | 13674 | 62  | 0 | 0.789229943133706   |    |
| MV_Schw | G  | 13675 | 312 | 0 | 0.00278418782064866 |    |
| MV_Schw | A  | 13676 | 23  | 1 |                     | 1  |
| MV_Schw | T  | 13677 | 25  | 0 |                     | 1  |
| MV_Schw | T  | 13678 | 4   | 0 |                     | 1  |

|         |    |       |     |   |                    |    |
|---------|----|-------|-----|---|--------------------|----|
| MV_Schw | A  | 13679 | 52  | 1 |                    | 1  |
| MV_Schw | T  | 13680 | 45  | 0 |                    | 1  |
| MV_Schw | T  | 13681 | 132 | 0 | 0.222002676269896  |    |
| MV_Schw | C  | 13682 | 236 | 1 | 0.0898677847554452 |    |
| MV_Schw | A  | 13683 | 14  | 0 |                    | 1  |
| MV_Schw | C  | 13684 | 29  | 0 |                    | 1  |
| MV_Schw | T  | 13685 | 33  | 0 |                    | 1  |
| MV_Schw | A  | 13686 | 19  | 0 |                    | 1  |
| MV_Schw | T  | 13687 | 16  | 0 |                    | 1  |
| MV_Schw | C  | 13688 | 23  | 0 |                    | 1  |
| MV_Schw | T  | 13689 | 25  | 0 |                    | 1  |
| MV_Schw | A  | 13690 | 70  | 1 |                    | 1  |
| MV_Schw | C  | 13691 | 47  | 1 |                    | 1  |
| MV_Schw | T  | 13692 | 29  | 0 |                    | 1  |
| MV_Schw | T  | 13693 | 10  | 0 |                    | 1  |
| MV_Schw | G  | 13694 | 128 | 0 | 0.307480793677112  |    |
| MV_Schw | G  | 13695 | 97  | 0 | 0.503192867159235  |    |
| MV_Schw | G  | 13696 | 45  | 1 |                    | 1  |
| MV_Schw | C  | 13697 | 45  | 1 |                    | 1  |
| MV_Schw | C  | 13698 | 31  | 0 |                    | 1  |
| MV_Schw | NA | 13699 | 0   | 0 |                    | NA |
| MV_Schw | G  | 13700 | 39  | 0 |                    | 1  |
| MV_Schw | T  | 13701 | 29  | 0 |                    | 1  |
| MV_Schw | G  | 13702 | 58  | 0 | 0.953489044526869  |    |
| MV_Schw | T  | 13703 | 21  | 0 |                    | 1  |
| MV_Schw | G  | 13704 | 93  | 0 | 0.498091317793217  |    |
| MV_Schw | C  | 13705 | 209 | 1 | 0.444605338381727  |    |
| MV_Schw | G  | 13706 | 244 | 3 | 0.996771597822493  |    |
| MV_Schw | G  | 13707 | 99  | 1 | 0.944879389258477  |    |
| MV_Schw | C  | 13708 | 163 | 3 |                    | 1  |
| MV_Schw | C  | 13709 | 83  | 0 | 0.645428736569362  |    |
| MV_Schw | A  | 13710 | 48  | 0 | 0.950262622850522  |    |
| MV_Schw | T  | 13711 | 6   | 0 |                    | 1  |
| MV_Schw | C  | 13712 | 66  | 0 | 0.789229943133706  |    |
| MV_Schw | A  | 13713 | 16  | 0 |                    | 1  |
| MV_Schw | A  | 13714 | 43  | 0 |                    | 1  |

|         |    |       |     |   |                   |
|---------|----|-------|-----|---|-------------------|
| MV_Schw | T  | 13715 | 66  | 0 | 0.789229943133706 |
| MV_Schw | T  | 13716 | 118 | 1 | 0.789229943133706 |
| MV_Schw | G  | 13717 | 83  | 1 | 1                 |
| MV_Schw | G  | 13718 | 78  | 1 | 1                 |
| MV_Schw | G  | 13719 | 52  | 1 | 1                 |
| MV_Schw | C  | 13720 | 196 | 3 | 1                 |
| MV_Schw | A  | 13721 | 169 | 1 | 0.789229943133706 |
| MV_Schw | T  | 13722 | 6   | 0 | 1                 |
| MV_Schw | T  | 13723 | 17  | 1 | 0.983041048229953 |
| MV_Schw | T  | 13724 | 8   | 0 | 1                 |
| MV_Schw | G  | 13725 | 180 | 1 | 0.649372270546162 |
| MV_Schw | A  | 13726 | 2   | 1 | 0.491835918445353 |
| MV_Schw | T  | 13727 | 43  | 0 | 1                 |
| MV_Schw | G  | 13728 | 70  | 0 | 0.789229943133706 |
| MV_Schw | T  | 13729 | 2   | 0 | 1                 |
| MV_Schw | A  | 13730 | 4   | 0 | 1                 |
| MV_Schw | C  | 13731 | 35  | 0 | 1                 |
| MV_Schw | A  | 13732 | 101 | 1 | 0.944879389258477 |
| MV_Schw | T  | 13733 | 33  | 0 | 1                 |
| MV_Schw | T  | 13734 | 14  | 0 | 1                 |
| MV_Schw | A  | 13735 | 10  | 0 | 1                 |
| MV_Schw | T  | 13736 | 16  | 0 | 1                 |
| MV_Schw | C  | 13737 | 21  | 0 | 1                 |
| MV_Schw | A  | 13738 | 200 | 2 | 0.822598489333375 |
| MV_Schw | T  | 13739 | 25  | 0 | 1                 |
| MV_Schw | A  | 13740 | 45  | 3 | 0.340185031164498 |
| MV_Schw | G  | 13741 | 48  | 1 | 1                 |
| MV_Schw | NA | 13742 | 0   | 0 | NA                |
| MV_Schw | C  | 13743 | 52  | 1 | 1                 |
| MV_Schw | C  | 13744 | 33  | 0 | 1                 |
| MV_Schw | A  | 13745 | 12  | 0 | 1                 |
| MV_Schw | T  | 13746 | 17  | 0 | 1                 |
| MV_Schw | C  | 13747 | 47  | 1 | 1                 |
| MV_Schw | A  | 13748 | 120 | 0 | 0.297586725038221 |
| MV_Schw | G  | 13749 | 260 | 3 | 0.681693930547946 |
| MV_Schw | G  | 13750 | 132 | 1 | 0.659520109379356 |

|         |   |       |     |   |                    |
|---------|---|-------|-----|---|--------------------|
| MV_Schw | G | 13751 | 213 | 1 | 0.161503851613234  |
| MV_Schw | A | 13752 | 14  | 1 | 0.944879389258477  |
| MV_Schw | A | 13753 | 6   | 0 | 1                  |
| MV_Schw | A | 13754 | 14  | 0 | 1                  |
| MV_Schw | T | 13755 | 31  | 0 | 1                  |
| MV_Schw | A | 13756 | 54  | 1 | 1                  |
| MV_Schw | T | 13757 | 4   | 0 | 1                  |
| MV_Schw | C | 13758 | 97  | 0 | 0.503192867159235  |
| MV_Schw | A | 13759 | 56  | 1 | 1                  |
| MV_Schw | G | 13760 | 211 | 1 | 0.445919862395878  |
| MV_Schw | A | 13761 | 12  | 1 | 0.88950624150852   |
| MV_Schw | T | 13762 | 116 | 0 | 0.296710762771661  |
| MV_Schw | G | 13763 | 81  | 1 | 1                  |
| MV_Schw | G | 13764 | 4   | 0 | 1                  |
| MV_Schw | G | 13765 | 256 | 1 | 0.237817203872315  |
| MV_Schw | T | 13766 | 19  | 1 | 1                  |
| MV_Schw | G | 13767 | 114 | 1 | 1                  |
| MV_Schw | A | 13768 | 12  | 0 | 1                  |
| MV_Schw | G | 13769 | 196 | 0 | 0.0437133877334182 |
| MV_Schw | C | 13770 | 62  | 1 | 1                  |
| MV_Schw | T | 13771 | 54  | 1 | 1                  |
| MV_Schw | G | 13772 | 161 | 1 | 0.440157375549872  |
| MV_Schw | T | 13773 | 56  | 0 | 0.950262622850522  |
| MV_Schw | T | 13774 | 60  | 0 | 0.957721317456694  |
| MV_Schw | G | 13775 | 341 | 3 | 0.297936084972     |
| MV_Schw | T | 13776 | 23  | 0 | 1                  |
| MV_Schw | C | 13777 | 120 | 0 | 0.297586725038221  |
| MV_Schw | A | 13778 | 151 | 0 | 0.166500460032885  |
| MV_Schw | T | 13779 | 21  | 0 | 1                  |
| MV_Schw | C | 13780 | 48  | 0 | 0.950262622850522  |
| MV_Schw | G | 13781 | 140 | 1 | 0.986363032184908  |
| MV_Schw | T | 13782 | 17  | 0 | 1                  |
| MV_Schw | T | 13783 | 4   | 0 | 1                  |
| MV_Schw | C | 13784 | 72  | 0 | 0.791667533131283  |
| MV_Schw | C | 13785 | 19  | 0 | 1                  |
| MV_Schw | T | 13786 | 10  | 0 | 1                  |



|         |   |       |     |   |                    |   |
|---------|---|-------|-----|---|--------------------|---|
| MV_Schw | T | 13787 | 4   | 0 |                    | 1 |
| MV_Schw | T | 13788 | 47  | 1 |                    | 1 |
| MV_Schw | C | 13789 | 118 | 1 | 0.789229943133706  |   |
| MV_Schw | T | 13790 | 2   | 0 |                    | 1 |
| MV_Schw | A | 13791 | 4   | 0 |                    | 1 |
| MV_Schw | G | 13792 | 76  | 0 | 0.638894311640422  |   |
| MV_Schw | A | 13793 | 6   | 0 |                    | 1 |
| MV_Schw | A | 13794 | 4   | 0 |                    | 1 |
| MV_Schw | T | 13795 | 12  | 0 |                    | 1 |
| MV_Schw | G | 13796 | 52  | 0 | 0.950262622850522  |   |
| MV_Schw | A | 13797 | 2   | 0 |                    | 1 |
| MV_Schw | G | 13798 | 48  | 1 |                    | 1 |
| MV_Schw | C | 13799 | 89  | 0 | 0.497615650989996  |   |
| MV_Schw | A | 13800 | 33  | 0 |                    | 1 |
| MV_Schw | A | 13801 | 8   | 0 |                    | 1 |
| MV_Schw | A | 13802 | 8   | 0 |                    | 1 |
| MV_Schw | G | 13803 | 89  | 3 | 0.944879389258477  |   |
| MV_Schw | G | 13804 | 27  | 0 |                    | 1 |
| MV_Schw | A | 13805 | 6   | 0 |                    | 1 |
| MV_Schw | G | 13806 | 31  | 0 |                    | 1 |
| MV_Schw | T | 13807 | 6   | 0 |                    | 1 |
| MV_Schw | G | 13808 | 172 | 1 | 0.789229943133706  |   |
| MV_Schw | T | 13809 | 10  | 0 |                    | 1 |
| MV_Schw | T | 13810 | 45  | 1 |                    | 1 |
| MV_Schw | T | 13811 | 60  | 0 | 0.957721317456694  |   |
| MV_Schw | A | 13812 | 47  | 1 |                    | 1 |
| MV_Schw | A | 13813 | 27  | 1 |                    | 1 |
| MV_Schw | G | 13814 | 240 | 3 | 0.789229943133706  |   |
| MV_Schw | G | 13815 | 50  | 0 | 0.950262622850522  |   |
| MV_Schw | T | 13816 | 41  | 1 | 0.945767847051808  |   |
| MV_Schw | G | 13817 | 54  | 1 |                    | 1 |
| MV_Schw | C | 13818 | 233 | 1 | 0.124094801360285  |   |
| MV_Schw | T | 13819 | 60  | 1 |                    | 1 |
| MV_Schw | T | 13820 | 269 | 1 | 0.185820480450128  |   |
| MV_Schw | G | 13821 | 207 | 0 | 0.0469760201915419 |   |
| MV_Schw | T | 13822 | 2   | 0 |                    | 1 |

|         |   |       |     |   |                   |
|---------|---|-------|-----|---|-------------------|
| MV_Schw | C | 13823 | 165 | 0 | 0.121895614141351 |
| MV_Schw | A | 13824 | 120 | 1 | 1                 |
| MV_Schw | A | 13825 | 180 | 2 | 0.945848991671798 |
| MV_Schw | T | 13826 | 64  | 0 | 0.789229943133706 |
| MV_Schw | G | 13827 | 118 | 1 | 1                 |
| MV_Schw | C | 13828 | 205 | 1 | 0.220909668665287 |
| MV_Schw | T | 13829 | 8   | 0 | 1                 |
| MV_Schw | C | 13830 | 45  | 1 | 1                 |
| MV_Schw | T | 13831 | 138 | 0 | 0.22714633168584  |
| MV_Schw | A | 13832 | 62  | 0 | 0.789229943133706 |
| MV_Schw | A | 13833 | 76  | 0 | 0.638894311640422 |
| MV_Schw | G | 13834 | 120 | 1 | 1                 |
| MV_Schw | C | 13835 | 60  | 1 | 1                 |
| MV_Schw | C | 13836 | 25  | 0 | 1                 |
| MV_Schw | A | 13837 | 6   | 0 | 1                 |
| MV_Schw | C | 13838 | 97  | 1 | 0.944879389258477 |
| MV_Schw | C | 13839 | 27  | 1 | 1                 |
| MV_Schw | C | 13840 | 374 | 3 | 0.335229748200011 |
| MV_Schw | A | 13841 | 41  | 0 | 1                 |
| MV_Schw | A | 13842 | 16  | 1 | 0.950262622850522 |
| MV_Schw | A | 13843 | 14  | 0 | 1                 |
| MV_Schw | G | 13844 | 101 | 1 | 0.944879389258477 |
| MV_Schw | A | 13845 | 16  | 0 | 1                 |
| MV_Schw | T | 13846 | 6   | 0 | 1                 |
| MV_Schw | C | 13847 | 33  | 1 | 1                 |
| MV_Schw | T | 13848 | 29  | 0 | 1                 |
| MV_Schw | A | 13849 | 4   | 0 | 1                 |
| MV_Schw | C | 13850 | 136 | 1 | 0.983041048229953 |
| MV_Schw | A | 13851 | 74  | 1 | 1                 |
| MV_Schw | A | 13852 | 39  | 0 | 1                 |
| MV_Schw | G | 13853 | 165 | 3 | 1                 |
| MV_Schw | A | 13854 | 10  | 1 | 0.822598489333375 |
| MV_Schw | A | 13855 | 17  | 0 | 1                 |
| MV_Schw | A | 13856 | 4   | 0 | 1                 |
| MV_Schw | T | 13857 | 66  | 1 | 1                 |
| MV_Schw | T | 13858 | 31  | 1 | 1                 |

|         |   |       |     |   |                    |
|---------|---|-------|-----|---|--------------------|
| MV_Schw | C | 13859 | 258 | 3 | 0.681308121427830  |
| MV_Schw | T | 13860 | 60  | 1 | 1                  |
| MV_Schw | G | 13861 | 45  | 0 | 1                  |
| MV_Schw | G | 13862 | 45  | 3 | 0.144729111493106  |
| MV_Schw | C | 13863 | 23  | 0 | 1                  |
| MV_Schw | A | 13864 | 21  | 0 | 1                  |
| MV_Schw | T | 13865 | 10  | 0 | 1                  |
| MV_Schw | T | 13866 | 17  | 0 | 1                  |
| MV_Schw | G | 13867 | 107 | 1 | 0.945767847051808  |
| MV_Schw | T | 13868 | 19  | 0 | 1                  |
| MV_Schw | G | 13869 | 68  | 1 | 1                  |
| MV_Schw | G | 13870 | 182 | 0 | 0.060993248324147  |
| MV_Schw | T | 13871 | 2   | 0 | 1                  |
| MV_Schw | A | 13872 | 33  | 0 | 1                  |
| MV_Schw | T | 13873 | 21  | 0 | 1                  |
| MV_Schw | T | 13874 | 62  | 0 | 0.789229943133706  |
| MV_Schw | A | 13875 | 60  | 0 | 0.957721317456694  |
| MV_Schw | T | 13876 | 41  | 1 | 1                  |
| MV_Schw | A | 13877 | 114 | 2 | 1                  |
| MV_Schw | G | 13878 | 126 | 1 | 1                  |
| MV_Schw | A | 13879 | 207 | 2 | 0.734151152837751  |
| MV_Schw | G | 13880 | 229 | 1 | 0.365713575863648  |
| MV_Schw | C | 13881 | 85  | 1 | 1                  |
| MV_Schw | C | 13882 | 41  | 0 | 1                  |
| MV_Schw | T | 13883 | 107 | 1 | 0.945767847051808  |
| MV_Schw | A | 13884 | 68  | 1 | 1                  |
| MV_Schw | T | 13885 | 105 | 1 | 1                  |
| MV_Schw | C | 13886 | 186 | 2 | 0.948552432136014  |
| MV_Schw | C | 13887 | 186 | 0 | 0.0611551441006359 |
| MV_Schw | A | 13888 | 159 | 0 | 0.118907467124559  |
| MV_Schw | T | 13889 | 132 | 1 | 0.983041048229953  |
| MV_Schw | G | 13890 | 233 | 1 | 0.296710762771661  |
| MV_Schw | G | 13891 | 93  | 0 | 0.498091317793217  |
| MV_Schw | T | 13892 | 45  | 0 | 1                  |
| MV_Schw | C | 13893 | 43  | 0 | 1                  |
| MV_Schw | C | 13894 | 297 | 1 | 0.0265628244936291 |

|         |    |       |     |   |                      |
|---------|----|-------|-----|---|----------------------|
| MV_Schw | T  | 13895 | 54  | 0 | 0.950262622850522    |
| MV_Schw | T  | 13896 | 23  | 1 | 1                    |
| MV_Schw | C  | 13897 | 101 | 0 | 0.51781700540984     |
| MV_Schw | A  | 13898 | 91  | 1 | 1                    |
| MV_Schw | C  | 13899 | 147 | 1 | 0.547090293958293    |
| MV_Schw | T  | 13900 | 33  | 0 | 1                    |
| MV_Schw | T  | 13901 | 83  | 0 | 0.645428736569362    |
| MV_Schw | G  | 13902 | 23  | 0 | 1                    |
| MV_Schw | NA | 13903 | 0   | 0 | NA                   |
| MV_Schw | T  | 13904 | 14  | 0 | 1                    |
| MV_Schw | G  | 13905 | 21  | 0 | 1                    |
| MV_Schw | C  | 13906 | 161 | 1 | 0.78470776546672     |
| MV_Schw | T  | 13907 | 52  | 0 | 0.950262622850522    |
| MV_Schw | C  | 13908 | 107 | 0 | 0.380027812845055    |
| MV_Schw | A  | 13909 | 153 | 1 | 0.436311974989592    |
| MV_Schw | A  | 13910 | 19  | 0 | 1                    |
| MV_Schw | A  | 13911 | 19  | 0 | 1                    |
| MV_Schw | A  | 13912 | 6   | 0 | 1                    |
| MV_Schw | C  | 13913 | 184 | 1 | 0.277229700444564    |
| MV_Schw | T  | 13914 | 2   | 0 | 1                    |
| MV_Schw | T  | 13915 | 6   | 0 | 1                    |
| MV_Schw | G  | 13916 | 124 | 1 | 1                    |
| MV_Schw | C  | 13917 | 54  | 1 | 1                    |
| MV_Schw | A  | 13918 | 14  | 1 | 0.944879389258477    |
| MV_Schw | C  | 13919 | 50  | 0 | 0.950262622850522    |
| MV_Schw | A  | 13920 | 2   | 0 | 1                    |
| MV_Schw | C  | 13921 | 81  | 1 | 1                    |
| MV_Schw | A  | 13922 | 12  | 0 | 1                    |
| MV_Schw | A  | 13923 | 12  | 5 | 4.20402899900764e-06 |
| MV_Schw | C  | 13924 | 149 | 3 | 1                    |
| MV_Schw | T  | 13925 | 4   | 0 | 1                    |
| MV_Schw | G  | 13926 | 58  | 1 | 1                    |
| MV_Schw | T  | 13927 | 6   | 0 | 1                    |
| MV_Schw | G  | 13928 | 252 | 5 | 1                    |
| MV_Schw | T  | 13929 | 10  | 1 | 0.822598489333375    |
| MV_Schw | G  | 13930 | 56  | 4 | 0.106459164393546    |

|         |   |       |     |   |                    |   |
|---------|---|-------|-----|---|--------------------|---|
| MV_Schw | C | 13931 | 45  | 1 |                    | 1 |
| MV_Schw | A | 13932 | 33  | 0 |                    | 1 |
| MV_Schw | A | 13933 | 6   | 1 | 0.704667204683568  |   |
| MV_Schw | C | 13934 | 205 | 1 | 0.443070383640094  |   |
| MV_Schw | A | 13935 | 33  | 1 |                    | 1 |
| MV_Schw | T | 13936 | 17  | 1 | 0.983041048229953  |   |
| MV_Schw | G | 13937 | 45  | 3 | 0.144729111493106  |   |
| MV_Schw | G | 13938 | 236 | 7 | 0.660462773875324  |   |
| MV_Schw | T | 13939 | 62  | 0 | 0.789229943133706  |   |
| MV_Schw | T | 13940 | 27  | 0 |                    | 1 |
| MV_Schw | T | 13941 | 248 | 1 | 0.0939881971480582 |   |
| MV_Schw | A | 13942 | 6   | 0 |                    | 1 |
| MV_Schw | C | 13943 | 188 | 1 | 0.280292653941906  |   |
| MV_Schw | A | 13944 | 186 | 3 |                    | 1 |
| MV_Schw | C | 13945 | 262 | 1 | 0.181354408412572  |   |
| MV_Schw | A | 13946 | 47  | 1 |                    | 1 |
| MV_Schw | T | 13947 | 33  | 1 | 0.822598489333375  |   |
| MV_Schw | G | 13948 | 157 | 1 | 0.88950624150852   |   |
| MV_Schw | C | 13949 | 70  | 0 | 0.789229943133706  |   |
| MV_Schw | T | 13950 | 147 | 1 | 0.88950624150852   |   |
| MV_Schw | A | 13951 | 76  | 1 |                    | 1 |
| MV_Schw | T | 13952 | 95  | 0 | 0.499662168427985  |   |
| MV_Schw | A | 13953 | 64  | 0 | 0.789229943133706  |   |
| MV_Schw | T | 13954 | 58  | 0 | 0.953489044526869  |   |
| MV_Schw | G | 13955 | 93  | 1 |                    | 1 |
| MV_Schw | A | 13956 | 6   | 0 |                    | 1 |
| MV_Schw | C | 13957 | 769 | 7 | 0.0637677617687036 |   |
| MV_Schw | C | 13958 | 79  | 1 |                    | 1 |
| MV_Schw | T | 13959 | 45  | 1 |                    | 1 |
| MV_Schw | A | 13960 | 12  | 0 |                    | 1 |
| MV_Schw | C | 13961 | 234 | 3 |                    | 1 |
| MV_Schw | C | 13962 | 149 | 1 | 0.550155392537109  |   |
| MV_Schw | T | 13963 | 93  | 1 |                    | 1 |
| MV_Schw | C | 13964 | 78  | 1 |                    | 1 |
| MV_Schw | G | 13965 | 85  | 0 | 0.648224297390367  |   |
| MV_Schw | A | 13966 | 72  | 0 | 0.791667533131283  |   |

|         |   |       |     |    |                   |
|---------|---|-------|-----|----|-------------------|
| MV_Schw | C | 13967 | 248 | 2  | 0.528869794103543 |
| MV_Schw | C | 13968 | 128 | 3  | 1                 |
| MV_Schw | T | 13969 | 6   | 0  | 1                 |
| MV_Schw | G | 13970 | 17  | 0  | 1                 |
| MV_Schw | T | 13971 | 4   | 0  | 1                 |
| MV_Schw | T | 13972 | 56  | 2  | 0.968890372475178 |
| MV_Schw | G | 13973 | 153 | 1  | 0.88950624150852  |
| MV_Schw | T | 13974 | 4   | 0  | 1                 |
| MV_Schw | T | 13975 | 54  | 1  | 1                 |
| MV_Schw | G | 13976 | 91  | 1  | 1                 |
| MV_Schw | A | 13977 | 12  | 0  | 1                 |
| MV_Schw | A | 13978 | 27  | 1  | 1                 |
| MV_Schw | T | 13979 | 103 | 1  | 0.944879389258477 |
| MV_Schw | G | 13980 | 147 | 1  | 0.547090293958293 |
| MV_Schw | A | 13981 | 41  | 1  | 1                 |
| MV_Schw | A | 13982 | 17  | 0  | 1                 |
| MV_Schw | G | 13983 | 147 | 2  | 1                 |
| MV_Schw | A | 13984 | 39  | 1  | 1                 |
| MV_Schw | G | 13985 | 130 | 3  | 1                 |
| MV_Schw | T | 13986 | 21  | 0  | 1                 |
| MV_Schw | T | 13987 | 50  | 1  | 1                 |
| MV_Schw | A | 13988 | 116 | 2  | 1                 |
| MV_Schw | G | 13989 | 746 | 15 | 1                 |
| MV_Schw | A | 13990 | 109 | 1  | 0.947544583923452 |
| MV_Schw | A | 13991 | 72  | 1  | 1                 |
| MV_Schw | G | 13992 | 43  | 1  | 1                 |
| MV_Schw | A | 13993 | 10  | 0  | 1                 |
| MV_Schw | G | 13994 | 81  | 1  | 1                 |
| MV_Schw | T | 13995 | 105 | 3  | 0.950262622850522 |
| MV_Schw | T | 13996 | 41  | 1  | 0.945767847051808 |
| MV_Schw | C | 13997 | 192 | 1  | 0.285482351071617 |
| MV_Schw | A | 13998 | 10  | 0  | 1                 |
| MV_Schw | C | 13999 | 155 | 1  | 0.88950624150852  |
| MV_Schw | A | 14000 | 60  | 3  | 0.550155392537109 |
| MV_Schw | T | 14001 | 62  | 0  | 0.789229943133706 |
| MV_Schw | T | 14002 | 23  | 0  | 1                 |

|         |    |       |      |    |                   |
|---------|----|-------|------|----|-------------------|
| MV_Schw | NA | 14003 | 0    | 0  | NA                |
| MV_Schw | C  | 14004 | 66   | 0  | 0.789229943133706 |
| MV_Schw | T  | 14005 | 8    | 1  | 0.789229943133706 |
| MV_Schw | C  | 14006 | 116  | 5  | 0.308443216377307 |
| MV_Schw | T  | 14007 | 6    | 0  | 1                 |
| MV_Schw | T  | 14008 | 4    | 0  | 1                 |
| MV_Schw | G  | 14009 | 14   | 0  | 1                 |
| MV_Schw | T  | 14010 | 23   | 0  | 1                 |
| MV_Schw | G  | 14011 | 171  | 5  | 1                 |
| MV_Schw | T  | 14012 | 6    | 1  | 0.704667204683568 |
| MV_Schw | G  | 14013 | 29   | 1  | 1                 |
| MV_Schw | A  | 14014 | 31   | 2  | 0.428411386231373 |
| MV_Schw | A  | 14015 | 25   | 1  | 1                 |
| MV_Schw | A  | 14016 | 35   | 0  | 1                 |
| MV_Schw | G  | 14017 | 215  | 3  | 1                 |
| MV_Schw | C  | 14018 | 322  | 6  | 1                 |
| MV_Schw | G  | 14019 | 107  | 3  | 1                 |
| MV_Schw | A  | 14020 | 45   | 1  | 1                 |
| MV_Schw | C  | 14021 | 1692 | 31 | 0.98139756833885  |
| MV_Schw | G  | 14022 | 70   | 3  | 0.395791012435089 |
| MV_Schw | A  | 14023 | 16   | 0  | 1                 |
| MV_Schw | G  | 14024 | 167  | 7  | 0.364391784466808 |
| MV_Schw | G  | 14025 | 41   | 2  | 0.599534349993353 |
| MV_Schw | A  | 14026 | 35   | 0  | 1                 |
| MV_Schw | T  | 14027 | 48   | 1  | 1                 |
| MV_Schw | G  | 14028 | 136  | 1  | 0.667619064364632 |
| MV_Schw | T  | 14029 | 4    | 0  | 1                 |
| MV_Schw | A  | 14030 | 43   | 0  | 1                 |
| MV_Schw | G  | 14031 | 209  | 3  | 1                 |
| MV_Schw | T  | 14032 | 91   | 1  | 1                 |
| MV_Schw | A  | 14033 | 70   | 1  | 1                 |
| MV_Schw | C  | 14034 | 52   | 1  | 1                 |
| MV_Schw | C  | 14035 | 484  | 5  | 0.259624814115061 |
| MV_Schw | G  | 14036 | 145  | 0  | 0.161503851613234 |
| MV_Schw | G  | 14037 | 647  | 19 | 0.354972433257953 |
| MV_Schw | A  | 14038 | 205  | 3  | 1                 |

|         |   |       |      |    |                   |
|---------|---|-------|------|----|-------------------|
| MV_Schw | C | 14039 | 174  | 8  | 0.121832950892168 |
| MV_Schw | A | 14040 | 39   | 2  | 0.560243889454362 |
| MV_Schw | G | 14041 | 105  | 2  | 1                 |
| MV_Schw | A | 14042 | 163  | 4  | 1                 |
| MV_Schw | T | 14043 | 95   | 4  | 0.542247232322076 |
| MV_Schw | T | 14044 | 62   | 1  | 1                 |
| MV_Schw | C | 14045 | 1211 | 26 | 1                 |
| MV_Schw | G | 14046 | 171  | 3  | 1                 |
| MV_Schw | A | 14047 | 140  | 1  | 0.542247232322076 |
| MV_Schw | C | 14048 | 452  | 11 | 0.953489044526869 |
| MV_Schw | A | 14049 | 29   | 1  | 1                 |
| MV_Schw | A | 14050 | 2    | 0  | 1                 |
| MV_Schw | C | 14051 | 68   | 3  | 0.378469870290234 |
| MV_Schw | A | 14052 | 47   | 1  | 1                 |
| MV_Schw | T | 14053 | 52   | 1  | 1                 |
| MV_Schw | C | 14054 | 6    | 0  | 1                 |
| MV_Schw | C | 14055 | 39   | 2  | 0.560243889454362 |
| MV_Schw | A | 14056 | 54   | 2  | 0.789229943133706 |
| MV_Schw | G | 14057 | 149  | 3  | 1                 |
| MV_Schw | G | 14058 | 269  | 5  | 1                 |
| MV_Schw | C | 14059 | 58   | 0  | 0.953489044526869 |
| MV_Schw | A | 14060 | 62   | 0  | 0.789229943133706 |
| MV_Schw | A | 14061 | 14   | 1  | 0.426789350155389 |
| MV_Schw | A | 14062 | 25   | 1  | 0.704667204683568 |
| MV_Schw | A | 14063 | 17   | 1  | 0.983041048229953 |
| MV_Schw | C | 14064 | 167  | 3  | 1                 |
| MV_Schw | A | 14065 | 2    | 0  | 1                 |
| MV_Schw | C | 14066 | 120  | 3  | 1                 |
| MV_Schw | T | 14067 | 10   | 1  | 0.822598489333375 |
| MV_Schw | T | 14068 | 47   | 1  | 1                 |
| MV_Schw | A | 14069 | 25   | 0  | 1                 |
| MV_Schw | T | 14070 | 16   | 0  | 1                 |
| MV_Schw | G | 14071 | 97   | 3  | 0.78354985902497  |
| MV_Schw | T | 14072 | 8    | 1  | 0.789229943133706 |
| MV_Schw | G | 14073 | 184  | 5  | 1                 |
| MV_Schw | T | 14074 | 14   | 0  | 1                 |



|         |   |       |     |    |                    |   |
|---------|---|-------|-----|----|--------------------|---|
| MV_Schw | T | 14075 | 43  | 1  |                    | 1 |
| MV_Schw | C | 14076 | 200 | 5  |                    | 1 |
| MV_Schw | T | 14077 | 213 | 6  | 0.88387110223483   |   |
| MV_Schw | G | 14078 | 141 | 3  |                    | 1 |
| MV_Schw | G | 14079 | 393 | 7  |                    | 1 |
| MV_Schw | C | 14080 | 349 | 6  |                    | 1 |
| MV_Schw | A | 14081 | 54  | 0  | 0.950262622850522  |   |
| MV_Schw | G | 14082 | 72  | 1  |                    | 1 |
| MV_Schw | A | 14083 | 29  | 1  |                    | 1 |
| MV_Schw | T | 14084 | 101 | 1  |                    | 1 |
| MV_Schw | T | 14085 | 12  | 0  |                    | 1 |
| MV_Schw | T | 14086 | 31  | 1  |                    | 1 |
| MV_Schw | G | 14087 | 172 | 3  |                    | 1 |
| MV_Schw | T | 14088 | 6   | 0  |                    | 1 |
| MV_Schw | A | 14089 | 136 | 3  |                    | 1 |
| MV_Schw | C | 14090 | 99  | 3  |                    | 1 |
| MV_Schw | T | 14091 | 85  | 1  |                    | 1 |
| MV_Schw | G | 14092 | 134 | 6  | 0.266392480714714  |   |
| MV_Schw | T | 14093 | 10  | 0  |                    | 1 |
| MV_Schw | C | 14094 | 293 | 3  | 0.746970975838775  |   |
| MV_Schw | A | 14095 | 508 | 6  | 0.497615650989996  |   |
| MV_Schw | A | 14096 | 37  | 1  |                    | 1 |
| MV_Schw | C | 14097 | 446 | 12 | 0.791667533131283  |   |
| MV_Schw | C | 14098 | 709 | 9  | 0.314998410148258  |   |
| MV_Schw | A | 14099 | 31  | 1  |                    | 1 |
| MV_Schw | G | 14100 | 341 | 5  | 0.89537976468582   |   |
| MV_Schw | G | 14101 | 91  | 1  |                    | 1 |
| MV_Schw | G | 14102 | 291 | 11 | 0.258627633593378  |   |
| MV_Schw | A | 14103 | 8   | 0  |                    | 1 |
| MV_Schw | C | 14104 | 180 | 2  | 0.945848991671798  |   |
| MV_Schw | C | 14105 | 184 | 3  |                    | 1 |
| MV_Schw | T | 14106 | 48  | 1  |                    | 1 |
| MV_Schw | G | 14107 | 293 | 4  | 0.950262622850522  |   |
| MV_Schw | C | 14108 | 341 | 9  | 0.904674542662588  |   |
| MV_Schw | C | 14109 | 479 | 17 | 0.0980708577143959 |   |
| MV_Schw | C | 14110 | 308 | 10 | 0.458140132486958  |   |

|         |   |       |     |   |                    |   |
|---------|---|-------|-----|---|--------------------|---|
| MV_Schw | A | 14111 | 242 | 8 | 0.550502133604656  |   |
| MV_Schw | C | 14112 | 114 | 4 | 0.658415249679101  |   |
| MV_Schw | C | 14113 | 39  | 1 |                    | 1 |
| MV_Schw | A | 14114 | 52  | 2 | 0.78354985902497   |   |
| MV_Schw | A | 14115 | 72  | 1 |                    | 1 |
| MV_Schw | T | 14116 | 60  | 2 | 0.983041048229953  |   |
| MV_Schw | T | 14117 | 242 | 5 |                    | 1 |
| MV_Schw | C | 14118 | 178 | 3 |                    | 1 |
| MV_Schw | G | 14119 | 45  | 0 |                    | 1 |
| MV_Schw | A | 14120 | 10  | 0 |                    | 1 |
| MV_Schw | G | 14121 | 229 | 9 | 0.307480793677112  |   |
| MV_Schw | G | 14122 | 50  | 1 |                    | 1 |
| MV_Schw | T | 14123 | 2   | 0 |                    | 1 |
| MV_Schw | C | 14124 | 52  | 1 |                    | 1 |
| MV_Schw | T | 14125 | 10  | 0 |                    | 1 |
| MV_Schw | A | 14126 | 33  | 0 |                    | 1 |
| MV_Schw | A | 14127 | 17  | 0 |                    | 1 |
| MV_Schw | G | 14128 | 85  | 5 | 0.17325046551955   |   |
| MV_Schw | A | 14129 | 16  | 0 |                    | 1 |
| MV_Schw | C | 14130 | 134 | 5 | 0.704667204683568  |   |
| MV_Schw | C | 14131 | 43  | 1 |                    | 1 |
| MV_Schw | G | 14132 | 52  | 4 | 0.0841644149519328 |   |
| MV_Schw | G | 14133 | 97  | 3 | 0.78354985902497   |   |
| MV_Schw | T | 14134 | 33  | 1 |                    | 1 |
| MV_Schw | A | 14135 | 43  | 0 |                    | 1 |
| MV_Schw | G | 14136 | 149 | 1 | 0.88950624150852   |   |
| MV_Schw | A | 14137 | 4   | 0 |                    | 1 |
| MV_Schw | G | 14138 | 440 | 3 | 0.0571641206130326 |   |
| MV_Schw | A | 14139 | 50  | 3 | 0.199842243730937  |   |
| MV_Schw | A | 14140 | 27  | 0 |                    | 1 |
| MV_Schw | A | 14141 | 50  | 1 |                    | 1 |
| MV_Schw | T | 14142 | 35  | 1 | 0.863499923807603  |   |
| MV_Schw | G | 14143 | 194 | 6 | 0.725511104255308  |   |
| MV_Schw | T | 14144 | 302 | 5 |                    | 1 |
| MV_Schw | G | 14145 | 302 | 9 | 0.78661714180561   |   |
| MV_Schw | C | 14146 | 335 | 8 |                    | 1 |

|         |   |       |     |    |                     |   |
|---------|---|-------|-----|----|---------------------|---|
| MV_Schw | A | 14147 | 132 | 5  | 0.694842282240476   |   |
| MV_Schw | G | 14148 | 171 | 2  |                     | 1 |
| MV_Schw | T | 14149 | 114 | 3  | 0.953489044526869   |   |
| MV_Schw | T | 14150 | 4   | 0  |                     | 1 |
| MV_Schw | C | 14151 | 163 | 2  |                     | 1 |
| MV_Schw | T | 14152 | 37  | 2  | 0.528591092326266   |   |
| MV_Schw | A | 14153 | 140 | 5  | 0.7318017534422     |   |
| MV_Schw | A | 14154 | 107 | 2  |                     | 1 |
| MV_Schw | C | 14155 | 351 | 7  |                     | 1 |
| MV_Schw | C | 14156 | 213 | 3  |                     | 1 |
| MV_Schw | G | 14157 | 72  | 0  | 0.791667533131283   |   |
| MV_Schw | A | 14158 | 68  | 0  | 0.789229943133706   |   |
| MV_Schw | C | 14159 | 318 | 17 | 0.00131350930751039 |   |
| MV_Schw | C | 14160 | 16  | 0  |                     | 1 |
| MV_Schw | A | 14161 | 16  | 0  |                     | 1 |
| MV_Schw | T | 14162 | 31  | 0  |                     | 1 |
| MV_Schw | A | 14163 | 37  | 0  |                     | 1 |
| MV_Schw | T | 14164 | 56  | 1  |                     | 1 |
| MV_Schw | C | 14165 | 66  | 1  |                     | 1 |
| MV_Schw | A | 14166 | 23  | 0  |                     | 1 |
| MV_Schw | A | 14167 | 58  | 0  | 0.953489044526869   |   |
| MV_Schw | G | 14168 | 223 | 5  |                     | 1 |
| MV_Schw | G | 14169 | 244 | 4  |                     | 1 |
| MV_Schw | C | 14170 | 110 | 1  |                     | 1 |
| MV_Schw | A | 14171 | 39  | 1  | 0.9314909603024     |   |
| MV_Schw | G | 14172 | 85  | 1  |                     | 1 |
| MV_Schw | A | 14173 | 97  | 3  |                     | 1 |
| MV_Schw | G | 14174 | 72  | 0  | 0.791667533131283   |   |
| MV_Schw | G | 14175 | 54  | 1  |                     | 1 |
| MV_Schw | C | 14176 | 19  | 0  |                     | 1 |
| MV_Schw | T | 14177 | 31  | 1  |                     | 1 |
| MV_Schw | A | 14178 | 23  | 0  |                     | 1 |
| MV_Schw | T | 14179 | 124 | 1  |                     | 1 |
| MV_Schw | G | 14180 | 355 | 3  | 0.397437008479015   |   |
| MV_Schw | T | 14181 | 4   | 1  | 0.619556855087002   |   |
| MV_Schw | T | 14182 | 48  | 1  |                     | 1 |

|         |   |       |     |    |                     |
|---------|---|-------|-----|----|---------------------|
| MV_Schw | A | 14183 | 48  | 0  | 0.950262622850522   |
| MV_Schw | T | 14184 | 78  | 1  | 1                   |
| MV_Schw | C | 14185 | 198 | 3  | 1                   |
| MV_Schw | T | 14186 | 112 | 3  | 1                   |
| MV_Schw | C | 14187 | 52  | 0  | 0.950262622850522   |
| MV_Schw | C | 14188 | 72  | 1  | 1                   |
| MV_Schw | A | 14189 | 78  | 2  | 1                   |
| MV_Schw | G | 14190 | 618 | 3  | 0.00526461084132655 |
| MV_Schw | C | 14191 | 461 | 7  | 0.88950624150852    |
| MV_Schw | A | 14192 | 16  | 0  | 1                   |
| MV_Schw | G | 14193 | 103 | 1  | 1                   |
| MV_Schw | G | 14194 | 19  | 0  | 1                   |
| MV_Schw | A | 14195 | 41  | 3  | 0.297586725038221   |
| MV_Schw | T | 14196 | 43  | 0  | 1                   |
| MV_Schw | C | 14197 | 39  | 1  | 1                   |
| MV_Schw | T | 14198 | 43  | 0  | 1                   |
| MV_Schw | T | 14199 | 12  | 0  | 1                   |
| MV_Schw | C | 14200 | 78  | 1  | 1                   |
| MV_Schw | G | 14201 | 709 | 15 | 1                   |
| MV_Schw | T | 14202 | 12  | 1  | 0.88950624150852    |
| MV_Schw | G | 14203 | 372 | 5  | 0.737900226779511   |
| MV_Schw | G | 14204 | 47  | 1  | 1                   |
| MV_Schw | A | 14205 | 35  | 0  | 1                   |
| MV_Schw | A | 14206 | 14  | 0  | 1                   |
| MV_Schw | C | 14207 | 409 | 5  | 0.78470776546672    |
| MV_Schw | A | 14208 | 21  | 1  | 1                   |
| MV_Schw | T | 14209 | 8   | 0  | 1                   |
| MV_Schw | A | 14210 | 4   | 0  | 1                   |
| MV_Schw | A | 14211 | 17  | 0  | 1                   |
| MV_Schw | A | 14212 | 37  | 0  | 1                   |
| MV_Schw | T | 14213 | 58  | 2  | 0.98139756833885    |
| MV_Schw | C | 14214 | 107 | 2  | 1                   |
| MV_Schw | C | 14215 | 91  | 0  | 0.497615650989996   |
| MV_Schw | A | 14216 | 50  | 1  | 1                   |
| MV_Schw | A | 14217 | 54  | 5  | 0.00939140138445221 |
| MV_Schw | T | 14218 | 174 | 7  | 0.387724101345207   |

|         |   |       |     |   |                    |   |
|---------|---|-------|-----|---|--------------------|---|
| MV_Schw | T | 14219 | 10  | 2 | 0.072815586219973  |   |
| MV_Schw | A | 14220 | 14  | 0 |                    | 1 |
| MV_Schw | T | 14221 | 2   | 0 |                    | 1 |
| MV_Schw | T | 14222 | 27  | 2 | 0.355295708921217  |   |
| MV_Schw | G | 14223 | 578 | 9 |                    | 1 |
| MV_Schw | T | 14224 | 8   | 0 |                    | 1 |
| MV_Schw | A | 14225 | 43  | 0 |                    | 1 |
| MV_Schw | G | 14226 | 87  | 1 |                    | 1 |
| MV_Schw | A | 14227 | 4   | 0 |                    | 1 |
| MV_Schw | C | 14228 | 93  | 2 |                    | 1 |
| MV_Schw | C | 14229 | 116 | 1 | 0.789229943133706  |   |
| MV_Schw | A | 14230 | 37  | 0 |                    | 1 |
| MV_Schw | T | 14231 | 68  | 0 | 0.789229943133706  |   |
| MV_Schw | T | 14232 | 27  | 0 |                    | 1 |
| MV_Schw | A | 14233 | 43  | 1 |                    | 1 |
| MV_Schw | C | 14234 | 357 | 1 | 0.0075482670441231 |   |
| MV_Schw | T | 14235 | 43  | 0 |                    | 1 |
| MV_Schw | C | 14236 | 48  | 0 | 0.950262622850522  |   |
| MV_Schw | A | 14237 | 107 | 0 | 0.380027812845055  |   |
| MV_Schw | T | 14238 | 85  | 1 |                    | 1 |
| MV_Schw | G | 14239 | 56  | 1 |                    | 1 |
| MV_Schw | C | 14240 | 29  | 0 |                    | 1 |
| MV_Schw | T | 14241 | 39  | 0 |                    | 1 |
| MV_Schw | C | 14242 | 238 | 1 | 0.0899009831500995 |   |
| MV_Schw | T | 14243 | 83  | 0 | 0.645428736569362  |   |
| MV_Schw | C | 14244 | 362 | 2 | 0.091052270243207  |   |
| MV_Schw | T | 14245 | 48  | 0 | 0.950262622850522  |   |
| MV_Schw | G | 14246 | 211 | 0 | 0.03148485115913   |   |
| MV_Schw | A | 14247 | 29  | 0 |                    | 1 |
| MV_Schw | C | 14248 | 504 | 3 | 0.0461779700819916 |   |
| MV_Schw | T | 14249 | 23  | 0 |                    | 1 |
| MV_Schw | T | 14250 | 25  | 0 |                    | 1 |
| MV_Schw | A | 14251 | 21  | 0 |                    | 1 |
| MV_Schw | T | 14252 | 54  | 1 |                    | 1 |
| MV_Schw | C | 14253 | 136 | 1 | 0.667619064364632  |   |
| MV_Schw | T | 14254 | 27  | 1 |                    | 1 |

|         |   |       |      |    |                      |
|---------|---|-------|------|----|----------------------|
| MV_Schw | C | 14255 | 548  | 5  | 0.206299564964148    |
| MV_Schw | C | 14256 | 386  | 1  | 0.0138245907553782   |
| MV_Schw | G | 14257 | 599  | 10 | 1                    |
| MV_Schw | G | 14258 | 490  | 4  | 0.119365022975779    |
| MV_Schw | C | 14259 | 3952 | 18 | 1.23602587259085e-22 |
| MV_Schw | G | 14260 | 87   | 1  | 1                    |
| MV_Schw | A | 14261 | 19   | 1  | 1                    |
| MV_Schw | G | 14262 | 79   | 1  | 1                    |
| MV_Schw | G | 14263 | 500  | 3  | 0.0200805323071868   |
| MV_Schw | A | 14264 | 126  | 0  | 0.305061614162072    |
| MV_Schw | T | 14265 | 16   | 0  | 1                    |
| MV_Schw | C | 14266 | 109  | 0  | 0.381672248067152    |
| MV_Schw | G | 14267 | 182  | 3  | 1                    |
| MV_Schw | A | 14268 | 99   | 0  | 0.509396577320122    |
| MV_Schw | T | 14269 | 27   | 0  | 1                    |
| MV_Schw | C | 14270 | 266  | 3  | 0.686252029850593    |
| MV_Schw | A | 14271 | 124  | 1  | 0.791667533131283    |
| MV_Schw | A | 14272 | 66   | 1  | 1                    |
| MV_Schw | A | 14273 | 8    | 0  | 1                    |
| MV_Schw | C | 14274 | 81   | 1  | 1                    |
| MV_Schw | A | 14275 | 27   | 0  | 1                    |
| MV_Schw | G | 14276 | 17   | 1  | 0.983041048229953    |
| MV_Schw | A | 14277 | 128  | 0  | 0.307480793677112    |
| MV_Schw | T | 14278 | 27   | 0  | 1                    |
| MV_Schw | A | 14279 | 25   | 0  | 1                    |
| MV_Schw | A | 14280 | 6    | 0  | 1                    |
| MV_Schw | G | 14281 | 31   | 1  | 0.791667533131283    |
| MV_Schw | A | 14282 | 58   | 1  | 1                    |
| MV_Schw | T | 14283 | 50   | 0  | 0.950262622850522    |
| MV_Schw | T | 14284 | 116  | 1  | 1                    |
| MV_Schw | G | 14285 | 35   | 0  | 1                    |
| MV_Schw | A | 14286 | 4    | 0  | 1                    |
| MV_Schw | G | 14287 | 186  | 1  | 0.278307737263878    |
| MV_Schw | A | 14288 | 225  | 2  | 0.632968068765344    |
| MV_Schw | G | 14289 | 132  | 3  | 1                    |
| MV_Schw | T | 14290 | 17   | 0  | 1                    |

|         |    |       |      |    |                      |
|---------|----|-------|------|----|----------------------|
| MV_Schw | T  | 14291 | 6    | 1  | 0.704667204683568    |
| MV_Schw | G  | 14292 | 107  | 2  | 1                    |
| MV_Schw | A  | 14293 | 97   | 1  | 1                    |
| MV_Schw | T  | 14294 | 140  | 1  | 0.542247232322076    |
| MV_Schw | C  | 14295 | 1552 | 10 | 1.56805760288631e-06 |
| MV_Schw | C  | 14296 | 403  | 3  | 0.235625059136761    |
| MV_Schw | A  | 14297 | 19   | 1  | 1                    |
| MV_Schw | G  | 14298 | 83   | 1  | 1                    |
| MV_Schw | G  | 14299 | 734  | 4  | 0.00132654463285745  |
| MV_Schw | A  | 14300 | 52   | 1  | 1                    |
| MV_Schw | T  | 14301 | 64   | 0  | 0.789229943133706    |
| MV_Schw | T  | 14302 | 25   | 0  | 1                    |
| MV_Schw | C  | 14303 | 103  | 0  | 0.37877131423274     |
| MV_Schw | A  | 14304 | 207  | 1  | 0.444112248634472    |
| MV_Schw | T  | 14305 | 99   | 1  | 1                    |
| MV_Schw | T  | 14306 | 318  | 1  | 0.0138245907553782   |
| MV_Schw | T  | 14307 | 70   | 0  | 0.789229943133706    |
| MV_Schw | T  | 14308 | 109  | 1  | 0.947544583923452    |
| MV_Schw | C  | 14309 | 395  | 1  | 0.0144134929005669   |
| MV_Schw | G  | 14310 | 812  | 4  | 0.000213539799552206 |
| MV_Schw | A  | 14311 | 136  | 2  | 1                    |
| MV_Schw | C  | 14312 | 165  | 1  | 0.444605338381727    |
| MV_Schw | G  | 14313 | 10   | 0  | 1                    |
| MV_Schw | C  | 14314 | 27   | 0  | 1                    |
| MV_Schw | C  | 14315 | 219  | 1  | 0.355607115956135    |
| MV_Schw | C  | 14316 | 66   | 0  | 0.789229943133706    |
| MV_Schw | T  | 14317 | 54   | 0  | 0.950262622850522    |
| MV_Schw | C  | 14318 | 333  | 0  | 0.00125895595678960  |
| MV_Schw | G  | 14319 | 130  | 2  | 1                    |
| MV_Schw | C  | 14320 | 149  | 0  | 0.164331455962041    |
| MV_Schw | T  | 14321 | 21   | 0  | 1                    |
| MV_Schw | G  | 14322 | 23   | 0  | 1                    |
| MV_Schw | NA | 14323 | 0    | 0  | NA                   |
| MV_Schw | G  | 14324 | 83   | 2  | 1                    |
| MV_Schw | G  | 14325 | 128  | 1  | 0.658415249679101    |
| MV_Schw | T  | 14326 | 12   | 0  | 1                    |

|         |    |       |     |   |                      |
|---------|----|-------|-----|---|----------------------|
| MV_Schw | A  | 14327 | 4   | 0 | 1                    |
| MV_Schw | A  | 14328 | 2   | 0 | 1                    |
| MV_Schw | A  | 14329 | 43  | 0 | 1                    |
| MV_Schw | T  | 14330 | 151 | 0 | 0.166500460032885    |
| MV_Schw | G  | 14331 | 54  | 0 | 0.950262622850522    |
| MV_Schw | NA | 14332 | 0   | 0 | NA                   |
| MV_Schw | C  | 14333 | 56  | 0 | 0.950262622850522    |
| MV_Schw | A  | 14334 | 35  | 0 | 1                    |
| MV_Schw | G  | 14335 | 583 | 3 | 0.00345964920612651  |
| MV_Schw | T  | 14336 | 2   | 0 | 1                    |
| MV_Schw | C  | 14337 | 62  | 0 | 0.789229943133706    |
| MV_Schw | A  | 14338 | 12  | 1 | 0.88950624150852     |
| MV_Schw | G  | 14339 | 219 | 1 | 0.355607115956135    |
| MV_Schw | C  | 14340 | 56  | 0 | 0.950262622850522    |
| MV_Schw | C  | 14341 | 857 | 2 | 5.68118384982631e-07 |
| MV_Schw | A  | 14342 | 52  | 1 | 1                    |
| MV_Schw | A  | 14343 | 21  | 0 | 1                    |
| MV_Schw | A  | 14344 | 37  | 0 | 1                    |
| MV_Schw | G  | 14345 | 229 | 0 | 0.0226023994581542   |
| MV_Schw | A  | 14346 | 12  | 1 | 0.88950624150852     |
| MV_Schw | T  | 14347 | 64  | 1 | 1                    |
| MV_Schw | C  | 14348 | 122 | 0 | 0.298485329352986    |
| MV_Schw | G  | 14349 | 386 | 3 | 0.156385357896295    |
| MV_Schw | G  | 14350 | 295 | 3 | 0.747277641572764    |
| MV_Schw | C  | 14351 | 481 | 5 | 0.258627633593378    |
| MV_Schw | A  | 14352 | 85  | 0 | 0.648224297390367    |
| MV_Schw | G  | 14353 | 47  | 1 | 1                    |
| MV_Schw | C  | 14354 | 213 | 2 | 0.73548636006501     |
| MV_Schw | A  | 14355 | 29  | 0 | 1                    |
| MV_Schw | A  | 14356 | 54  | 0 | 0.950262622850522    |
| MV_Schw | C  | 14357 | 244 | 2 | 0.528591092326266    |
| MV_Schw | A  | 14358 | 45  | 1 | 1                    |
| MV_Schw | A  | 14359 | 2   | 0 | 1                    |
| MV_Schw | C  | 14360 | 37  | 0 | 1                    |
| MV_Schw | A  | 14361 | 10  | 0 | 1                    |
| MV_Schw | T  | 14362 | 4   | 0 | 1                    |



|         |   |       |      |    |                      |   |
|---------|---|-------|------|----|----------------------|---|
| MV_Schw | C | 14363 | 116  | 3  |                      | 1 |
| MV_Schw | T | 14364 | 21   | 0  |                      | 1 |
| MV_Schw | C | 14365 | 54   | 1  |                      | 1 |
| MV_Schw | A | 14366 | 21   | 0  |                      | 1 |
| MV_Schw | A | 14367 | 126  | 0  | 0.305061614162072    |   |
| MV_Schw | A | 14368 | 10   | 1  | 0.307480793677112    |   |
| MV_Schw | T | 14369 | 68   | 0  | 0.789229943133706    |   |
| MV_Schw | A | 14370 | 10   | 0  |                      | 1 |
| MV_Schw | T | 14371 | 54   | 1  |                      | 1 |
| MV_Schw | G | 14372 | 72   | 0  | 0.791667533131283    |   |
| MV_Schw | A | 14373 | 50   | 0  | 0.950262622850522    |   |
| MV_Schw | G | 14374 | 419  | 2  | 0.0311763572250604   |   |
| MV_Schw | C | 14375 | 52   | 0  | 0.950262622850522    |   |
| MV_Schw | A | 14376 | 116  | 1  | 0.789229943133706    |   |
| MV_Schw | T | 14377 | 27   | 1  |                      | 1 |
| MV_Schw | C | 14378 | 116  | 1  |                      | 1 |
| MV_Schw | A | 14379 | 364  | 1  | 0.00513119326731813  |   |
| MV_Schw | A | 14380 | 380  | 1  | 0.00370445205499624  |   |
| MV_Schw | G | 14381 | 1312 | 5  | 4.76102527336292e-08 |   |
| MV_Schw | G | 14382 | 1320 | 10 | 0.00017978788886701  |   |
| MV_Schw | C | 14383 | 353  | 2  | 0.089478331324259    |   |
| MV_Schw | T | 14384 | 143  | 1  | 0.88950624150852     |   |
| MV_Schw | T | 14385 | 240  | 1  | 0.298485329352986    |   |
| MV_Schw | T | 14386 | 649  | 3  | 0.000711664748749921 |   |
| MV_Schw | C | 14387 | 955  | 3  | 1.84504545535763e-06 |   |
| MV_Schw | A | 14388 | 324  | 3  | 0.348493993166116    |   |
| MV_Schw | G | 14389 | 390  | 3  | 0.120050352121446    |   |
| MV_Schw | A | 14390 | 21   | 0  |                      | 1 |
| MV_Schw | C | 14391 | 196  | 2  | 0.822598489333375    |   |
| MV_Schw | C | 14392 | 74   | 1  |                      | 1 |
| MV_Schw | C | 14393 | 48   | 0  | 0.950262622850522    |   |
| MV_Schw | C | 14394 | 112  | 0  | 0.390108970321283    |   |
| MV_Schw | C | 14395 | 153  | 1  | 0.88950624150852     |   |
| MV_Schw | A | 14396 | 118  | 3  | 0.96855857297699     |   |
| MV_Schw | C | 14397 | 184  | 3  |                      | 1 |
| MV_Schw | A | 14398 | 37   | 0  |                      | 1 |

|         |    |       |     |   |                     |
|---------|----|-------|-----|---|---------------------|
| MV_Schw | C  | 14399 | 988 | 7 | 0.00180289709652049 |
| MV_Schw | G  | 14400 | 56  | 0 | 0.950262622850522   |
| MV_Schw | NA | 14401 | 0   | 0 | NA                  |
| MV_Schw | T  | 14402 | 126 | 0 | 0.305061614162072   |
| MV_Schw | G  | 14403 | 45  | 1 | 1                   |
| MV_Schw | A  | 14404 | 10  | 0 | 1                   |
| MV_Schw | T  | 14405 | 21  | 0 | 1                   |
| MV_Schw | G  | 14406 | 41  | 1 | 1                   |
| MV_Schw | T  | 14407 | 33  | 1 | 0.822598489333375   |
| MV_Schw | T  | 14408 | 41  | 1 | 1                   |
| MV_Schw | G  | 14409 | 190 | 1 | 0.282444566862733   |
| MV_Schw | C  | 14410 | 180 | 3 | 1                   |
| MV_Schw | A  | 14411 | 37  | 0 | 1                   |
| MV_Schw | A  | 14412 | 21  | 1 | 1                   |
| MV_Schw | A  | 14413 | 19  | 0 | 1                   |
| MV_Schw | A  | 14414 | 19  | 0 | 1                   |
| MV_Schw | T  | 14415 | 33  | 1 | 1                   |
| MV_Schw | T  | 14416 | 12  | 0 | 1                   |
| MV_Schw | G  | 14417 | 107 | 0 | 0.380027812845055   |
| MV_Schw | C  | 14418 | 114 | 0 | 0.395791012435089   |
| MV_Schw | T  | 14419 | 10  | 0 | 1                   |
| MV_Schw | C  | 14420 | 153 | 0 | 0.169696698380260   |
| MV_Schw | A  | 14421 | 23  | 0 | 1                   |
| MV_Schw | A  | 14422 | 23  | 0 | 1                   |
| MV_Schw | A  | 14423 | 17  | 1 | 0.983041048229953   |
| MV_Schw | G  | 14424 | 273 | 0 | 0.00834402009997063 |
| MV_Schw | A  | 14425 | 12  | 0 | 1                   |
| MV_Schw | T  | 14426 | 33  | 0 | 1                   |
| MV_Schw | A  | 14427 | 33  | 0 | 1                   |
| MV_Schw | T  | 14428 | 25  | 0 | 1                   |
| MV_Schw | C  | 14429 | 31  | 0 | 1                   |
| MV_Schw | A  | 14430 | 27  | 0 | 1                   |
| MV_Schw | A  | 14431 | 21  | 0 | 1                   |
| MV_Schw | C  | 14432 | 202 | 0 | 0.0445795746199782  |
| MV_Schw | A  | 14433 | 17  | 1 | 0.983041048229953   |
| MV_Schw | C  | 14434 | 103 | 0 | 0.37877131423274    |

|         |   |       |     |   |                   |   |
|---------|---|-------|-----|---|-------------------|---|
| MV_Schw | A | 14435 | 45  | 0 |                   | 1 |
| MV_Schw | A | 14436 | 19  | 0 |                   | 1 |
| MV_Schw | G | 14437 | 180 | 0 | 0.090192830807046 |   |
| MV_Schw | C | 14438 | 56  | 0 | 0.950262622850522 |   |
| MV_Schw | A | 14439 | 62  | 0 | 0.789229943133706 |   |
| MV_Schw | A | 14440 | 10  | 0 |                   | 1 |
| MV_Schw | G | 14441 | 357 | 3 | 0.24326729297091  |   |
| MV_Schw | C | 14442 | 161 | 1 | 0.78470776546672  |   |
| MV_Schw | A | 14443 | 17  | 0 |                   | 1 |
| MV_Schw | C | 14444 | 27  | 1 |                   | 1 |
| MV_Schw | A | 14445 | 14  | 1 | 0.426789350155389 |   |
| MV_Schw | A | 14446 | 21  | 0 |                   | 1 |
| MV_Schw | T | 14447 | 23  | 0 |                   | 1 |
| MV_Schw | C | 14448 | 54  | 0 | 0.950262622850522 |   |
| MV_Schw | T | 14449 | 21  | 0 |                   | 1 |
| MV_Schw | T | 14450 | 16  | 0 |                   | 1 |
| MV_Schw | C | 14451 | 145 | 1 | 0.88950624150852  |   |
| MV_Schw | C | 14452 | 289 | 2 | 0.299008113486341 |   |
| MV_Schw | C | 14453 | 8   | 0 |                   | 1 |
| MV_Schw | A | 14454 | 58  | 1 |                   | 1 |
| MV_Schw | T | 14455 | 19  | 0 |                   | 1 |
| MV_Schw | T | 14456 | 8   | 0 |                   | 1 |
| MV_Schw | T | 14457 | 12  | 0 |                   | 1 |
| MV_Schw | C | 14458 | 68  | 1 |                   | 1 |
| MV_Schw | A | 14459 | 14  | 0 |                   | 1 |
| MV_Schw | G | 14460 | 229 | 1 | 0.121832950892168 |   |
| MV_Schw | G | 14461 | 48  | 0 | 0.950262622850522 |   |
| MV_Schw | G | 14462 | 169 | 1 | 0.789229943133706 |   |
| MV_Schw | G | 14463 | 52  | 1 |                   | 1 |
| MV_Schw | G | 14464 | 27  | 0 |                   | 1 |
| MV_Schw | C | 14465 | 45  | 0 |                   | 1 |
| MV_Schw | A | 14466 | 72  | 0 | 0.791667533131283 |   |
| MV_Schw | A | 14467 | 35  | 0 |                   | 1 |
| MV_Schw | T | 14468 | 29  | 0 |                   | 1 |
| MV_Schw | C | 14469 | 120 | 1 | 0.789229943133706 |   |
| MV_Schw | T | 14470 | 31  | 0 |                   | 1 |

|         |   |       |     |   |                    |
|---------|---|-------|-----|---|--------------------|
| MV_Schw | C | 14471 | 155 | 1 | 0.88950624150852   |
| MV_Schw | G | 14472 | 229 | 0 | 0.0226023994581542 |
| MV_Schw | C | 14473 | 517 | 3 | 0.0109010733601991 |
| MV_Schw | C | 14474 | 192 | 3 | 1                  |
| MV_Schw | A | 14475 | 74  | 1 | 1                  |
| MV_Schw | A | 14476 | 17  | 0 | 1                  |
| MV_Schw | T | 14477 | 21  | 0 | 1                  |
| MV_Schw | T | 14478 | 14  | 1 | 0.944879389258477  |
| MV_Schw | A | 14479 | 124 | 1 | 0.791667533131283  |
| MV_Schw | T | 14480 | 23  | 0 | 1                  |
| MV_Schw | G | 14481 | 76  | 0 | 0.638894311640422  |
| MV_Schw | A | 14482 | 70  | 1 | 1                  |
| MV_Schw | A | 14483 | 14  | 0 | 1                  |
| MV_Schw | A | 14484 | 10  | 0 | 1                  |
| MV_Schw | T | 14485 | 45  | 0 | 1                  |
| MV_Schw | C | 14486 | 43  | 1 | 1                  |
| MV_Schw | C | 14487 | 85  | 0 | 0.648224297390367  |
| MV_Schw | A | 14488 | 76  | 0 | 0.638894311640422  |
| MV_Schw | T | 14489 | 54  | 0 | 0.950262622850522  |
| MV_Schw | G | 14490 | 76  | 0 | 0.638894311640422  |
| MV_Schw | C | 14491 | 52  | 0 | 0.950262622850522  |
| MV_Schw | T | 14492 | 29  | 0 | 1                  |
| MV_Schw | T | 14493 | 12  | 0 | 1                  |
| MV_Schw | T | 14494 | 10  | 0 | 1                  |
| MV_Schw | C | 14495 | 78  | 1 | 1                  |
| MV_Schw | C | 14496 | 83  | 2 | 1                  |
| MV_Schw | G | 14497 | 391 | 3 | 0.292851846040198  |
| MV_Schw | C | 14498 | 231 | 1 | 0.368057336222025  |
| MV_Schw | A | 14499 | 17  | 1 | 0.983041048229953  |
| MV_Schw | G | 14500 | 54  | 0 | 0.950262622850522  |
| MV_Schw | A | 14501 | 14  | 1 | 0.944879389258477  |
| MV_Schw | A | 14502 | 87  | 0 | 0.653463094391213  |
| MV_Schw | T | 14503 | 19  | 0 | 1                  |
| MV_Schw | C | 14504 | 14  | 1 | 0.944879389258477  |
| MV_Schw | G | 14505 | 33  | 0 | 1                  |
| MV_Schw | G | 14506 | 99  | 0 | 0.509396577320122  |

|         |   |       |     |   |                    |
|---------|---|-------|-----|---|--------------------|
| MV_Schw | G | 14507 | 663 | 7 | 0.151187630561661  |
| MV_Schw | T | 14508 | 21  | 0 | 1                  |
| MV_Schw | T | 14509 | 16  | 0 | 1                  |
| MV_Schw | G | 14510 | 39  | 0 | 1                  |
| MV_Schw | A | 14511 | 10  | 0 | 1                  |
| MV_Schw | A | 14512 | 27  | 0 | 1                  |
| MV_Schw | C | 14513 | 266 | 1 | 0.0488240602842801 |
| MV_Schw | T | 14514 | 10  | 0 | 1                  |
| MV_Schw | C | 14515 | 21  | 0 | 1                  |
| MV_Schw | A | 14516 | 47  | 0 | 1                  |
| MV_Schw | T | 14517 | 45  | 0 | 1                  |
| MV_Schw | C | 14518 | 167 | 0 | 0.124094801360285  |
| MV_Schw | T | 14519 | 14  | 0 | 1                  |
| MV_Schw | G | 14520 | 124 | 0 | 0.301343438464672  |
| MV_Schw | C | 14521 | 52  | 0 | 0.950262622850522  |
| MV_Schw | T | 14522 | 64  | 0 | 0.789229943133706  |
| MV_Schw | T | 14523 | 52  | 0 | 0.950262622850522  |
| MV_Schw | G | 14524 | 27  | 0 | 1                  |
| MV_Schw | C | 14525 | 35  | 0 | 1                  |
| MV_Schw | T | 14526 | 12  | 0 | 1                  |
| MV_Schw | A | 14527 | 10  | 0 | 1                  |
| MV_Schw | C | 14528 | 70  | 0 | 0.789229943133706  |
| MV_Schw | A | 14529 | 6   | 0 | 1                  |
| MV_Schw | A | 14530 | 37  | 1 | 1                  |
| MV_Schw | A | 14531 | 14  | 0 | 1                  |
| MV_Schw | G | 14532 | 19  | 0 | 1                  |
| MV_Schw | C | 14533 | 4   | 0 | 1                  |
| MV_Schw | T | 14534 | 10  | 0 | 1                  |
| MV_Schw | G | 14535 | 145 | 0 | 0.161503851613234  |
| MV_Schw | T | 14536 | 27  | 1 | 1                  |
| MV_Schw | T | 14537 | 25  | 0 | 1                  |
| MV_Schw | G | 14538 | 79  | 0 | 0.639207655977387  |
| MV_Schw | A | 14539 | 4   | 0 | 1                  |
| MV_Schw | G | 14540 | 33  | 0 | 1                  |
| MV_Schw | A | 14541 | 23  | 1 | 1                  |
| MV_Schw | T | 14542 | 35  | 0 | 1                  |

|         |   |       |     |   |                    |   |
|---------|---|-------|-----|---|--------------------|---|
| MV_Schw | A | 14543 | 8   | 0 |                    | 1 |
| MV_Schw | T | 14544 | 14  | 0 |                    | 1 |
| MV_Schw | C | 14545 | 16  | 0 |                    | 1 |
| MV_Schw | A | 14546 | 25  | 0 |                    | 1 |
| MV_Schw | A | 14547 | 21  | 0 |                    | 1 |
| MV_Schw | C | 14548 | 91  | 0 | 0.497615650989996  |   |
| MV_Schw | A | 14549 | 37  | 0 |                    | 1 |
| MV_Schw | T | 14550 | 6   | 0 |                    | 1 |
| MV_Schw | T | 14551 | 2   | 0 |                    | 1 |
| MV_Schw | A | 14552 | 8   | 0 |                    | 1 |
| MV_Schw | A | 14553 | 33  | 0 |                    | 1 |
| MV_Schw | T | 14554 | 35  | 0 |                    | 1 |
| MV_Schw | T | 14555 | 56  | 0 | 0.950262622850522  |   |
| MV_Schw | A | 14556 | 29  | 0 |                    | 1 |
| MV_Schw | G | 14557 | 27  | 0 |                    | 1 |
| MV_Schw | G | 14558 | 43  | 0 |                    | 1 |
| MV_Schw | A | 14559 | 12  | 0 |                    | 1 |
| MV_Schw | G | 14560 | 95  | 1 |                    | 1 |
| MV_Schw | A | 14561 | 6   | 0 |                    | 1 |
| MV_Schw | T | 14562 | 33  | 0 |                    | 1 |
| MV_Schw | G | 14563 | 37  | 0 |                    | 1 |
| MV_Schw | C | 14564 | 190 | 0 | 0.0626240647804826 |   |
| MV_Schw | C | 14565 | 326 | 1 | 0.0141787317264331 |   |
| MV_Schw | T | 14566 | 76  | 1 |                    | 1 |
| MV_Schw | T | 14567 | 33  | 0 |                    | 1 |
| MV_Schw | G | 14568 | 45  | 0 |                    | 1 |
| MV_Schw | A | 14569 | 35  | 1 |                    | 1 |
| MV_Schw | G | 14570 | 132 | 0 | 0.222002676269896  |   |
| MV_Schw | C | 14571 | 47  | 0 |                    | 1 |
| MV_Schw | C | 14572 | 138 | 1 | 0.983694697749173  |   |
| MV_Schw | A | 14573 | 12  | 0 |                    | 1 |
| MV_Schw | G | 14574 | 122 | 1 | 0.791667533131283  |   |
| MV_Schw | G | 14575 | 250 | 3 | 0.99869736415243   |   |
| MV_Schw | G | 14576 | 72  | 1 |                    | 1 |
| MV_Schw | G | 14577 | 37  | 0 |                    | 1 |
| MV_Schw | A | 14578 | 23  | 1 | 0.658415249679101  |   |

|         |   |       |     |   |                    |
|---------|---|-------|-----|---|--------------------|
| MV_Schw | G | 14579 | 93  | 0 | 0.498091317793217  |
| MV_Schw | G | 14580 | 234 | 2 | 0.638894311640422  |
| MV_Schw | A | 14581 | 91  | 1 | 1                  |
| MV_Schw | C | 14582 | 134 | 1 | 0.66330042087892   |
| MV_Schw | G | 14583 | 70  | 3 | 0.819327818667335  |
| MV_Schw | G | 14584 | 180 | 3 | 1                  |
| MV_Schw | C | 14585 | 209 | 2 | 0.734151152837751  |
| MV_Schw | T | 14586 | 56  | 3 | 0.499662168427985  |
| MV_Schw | T | 14587 | 16  | 1 | 0.950262622850522  |
| MV_Schw | G | 14588 | 79  | 3 | 0.882548734849042  |
| MV_Schw | T | 14589 | 19  | 0 | 1                  |
| MV_Schw | T | 14590 | 35  | 1 | 1                  |
| MV_Schw | C | 14591 | 324 | 4 | 0.789229943133706  |
| MV_Schw | T | 14592 | 14  | 0 | 1                  |
| MV_Schw | T | 14593 | 12  | 1 | 0.88950624150852   |
| MV_Schw | G | 14594 | 145 | 1 | 0.544375066438321  |
| MV_Schw | G | 14595 | 16  | 0 | 1                  |
| MV_Schw | G | 14596 | 72  | 1 | 1                  |
| MV_Schw | T | 14597 | 12  | 0 | 1                  |
| MV_Schw | G | 14598 | 151 | 3 | 1                  |
| MV_Schw | A | 14599 | 4   | 0 | 1                  |
| MV_Schw | G | 14600 | 93  | 0 | 0.498091317793217  |
| MV_Schw | G | 14601 | 116 | 1 | 1                  |
| MV_Schw | G | 14602 | 79  | 1 | 1                  |
| MV_Schw | A | 14603 | 171 | 2 | 1                  |
| MV_Schw | T | 14604 | 258 | 3 | 0.681308121427830  |
| MV_Schw | C | 14605 | 145 | 1 | 0.544375066438321  |
| MV_Schw | G | 14606 | 302 | 1 | 0.0278312919914174 |
| MV_Schw | G | 14607 | 141 | 0 | 0.235179608025014  |
| MV_Schw | G | 14608 | 250 | 4 | 1                  |
| MV_Schw | T | 14609 | 62  | 0 | 0.789229943133706  |
| MV_Schw | T | 14610 | 41  | 0 | 1                  |
| MV_Schw | C | 14611 | 107 | 0 | 0.380027812845055  |
| MV_Schw | T | 14612 | 19  | 0 | 1                  |
| MV_Schw | A | 14613 | 132 | 0 | 0.222002676269896  |
| MV_Schw | T | 14614 | 242 | 0 | 0.0160740981841532 |

|         |   |       |     |   |                    |
|---------|---|-------|-----|---|--------------------|
| MV_Schw | G | 14615 | 234 | 0 | 0.0156110009283988 |
| MV_Schw | T | 14616 | 10  | 0 | 1                  |
| MV_Schw | T | 14617 | 25  | 0 | 1                  |
| MV_Schw | G | 14618 | 29  | 1 | 1                  |
| MV_Schw | A | 14619 | 74  | 1 | 1                  |
| MV_Schw | T | 14620 | 14  | 0 | 1                  |
| MV_Schw | C | 14621 | 70  | 0 | 0.789229943133706  |
| MV_Schw | A | 14622 | 2   | 0 | 1                  |
| MV_Schw | C | 14623 | 50  | 0 | 0.950262622850522  |
| MV_Schw | T | 14624 | 6   | 0 | 1                  |
| MV_Schw | T | 14625 | 81  | 0 | 0.641186461810141  |
| MV_Schw | A | 14626 | 21  | 1 | 1                  |
| MV_Schw | T | 14627 | 23  | 0 | 1                  |
| MV_Schw | A | 14628 | 14  | 0 | 1                  |
| MV_Schw | A | 14629 | 17  | 0 | 1                  |
| MV_Schw | A | 14630 | 35  | 0 | 1                  |
| MV_Schw | G | 14631 | 122 | 1 | 0.791667533131283  |
| MV_Schw | A | 14632 | 14  | 0 | 1                  |
| MV_Schw | G | 14633 | 31  | 0 | 1                  |
| MV_Schw | A | 14634 | 12  | 0 | 1                  |
| MV_Schw | T | 14635 | 4   | 0 | 1                  |
| MV_Schw | A | 14636 | 8   | 0 | 1                  |
| MV_Schw | C | 14637 | 140 | 2 | 1                  |
| MV_Schw | T | 14638 | 8   | 0 | 1                  |
| MV_Schw | T | 14639 | 2   | 0 | 1                  |
| MV_Schw | A | 14640 | 8   | 0 | 1                  |
| MV_Schw | A | 14641 | 17  | 0 | 1                  |
| MV_Schw | A | 14642 | 29  | 1 | 1                  |
| MV_Schw | C | 14643 | 66  | 0 | 0.789229943133706  |
| MV_Schw | T | 14644 | 12  | 0 | 1                  |
| MV_Schw | A | 14645 | 54  | 0 | 0.950262622850522  |
| MV_Schw | A | 14646 | 37  | 0 | 1                  |
| MV_Schw | A | 14647 | 17  | 1 | 0.528591092326266  |
| MV_Schw | C | 14648 | 95  | 0 | 0.499662168427985  |
| MV_Schw | A | 14649 | 12  | 0 | 1                  |
| MV_Schw | A | 14650 | 27  | 0 | 1                  |



|         |   |       |     |   |                    |   |
|---------|---|-------|-----|---|--------------------|---|
| MV_Schw | G | 14651 | 27  | 1 |                    | 1 |
| MV_Schw | T | 14652 | 23  | 0 |                    | 1 |
| MV_Schw | G | 14653 | 58  | 0 | 0.953489044526869  |   |
| MV_Schw | C | 14654 | 68  | 0 | 0.789229943133706  |   |
| MV_Schw | T | 14655 | 25  | 0 |                    | 1 |
| MV_Schw | T | 14656 | 27  | 0 |                    | 1 |
| MV_Schw | C | 14657 | 83  | 0 | 0.645428736569362  |   |
| MV_Schw | T | 14658 | 19  | 1 |                    | 1 |
| MV_Schw | A | 14659 | 31  | 0 |                    | 1 |
| MV_Schw | T | 14660 | 60  | 0 | 0.957721317456694  |   |
| MV_Schw | A | 14661 | 54  | 1 |                    | 1 |
| MV_Schw | A | 14662 | 2   | 0 |                    | 1 |
| MV_Schw | T | 14663 | 19  | 0 |                    | 1 |
| MV_Schw | A | 14664 | 4   | 0 |                    | 1 |
| MV_Schw | G | 14665 | 289 | 2 | 0.299008113486341  |   |
| MV_Schw | T | 14666 | 120 | 0 | 0.297586725038221  |   |
| MV_Schw | G | 14667 | 465 | 3 | 0.0332784439309447 |   |
| MV_Schw | G | 14668 | 48  | 1 |                    | 1 |
| MV_Schw | G | 14669 | 33  | 0 |                    | 1 |
| MV_Schw | G | 14670 | 455 | 3 | 0.0445262456616469 |   |
| MV_Schw | T | 14671 | 10  | 0 |                    | 1 |
| MV_Schw | T | 14672 | 47  | 0 |                    | 1 |
| MV_Schw | T | 14673 | 25  | 0 |                    | 1 |
| MV_Schw | C | 14674 | 60  | 0 | 0.957721317456694  |   |
| MV_Schw | C | 14675 | 475 | 5 | 0.463720798159947  |   |
| MV_Schw | G | 14676 | 748 | 9 | 0.245994086620844  |   |
| MV_Schw | C | 14677 | 174 | 1 | 0.648224297390367  |   |
| MV_Schw | C | 14678 | 37  | 1 | 0.88950624150852   |   |
| MV_Schw | A | 14679 | 10  | 0 |                    | 1 |
| MV_Schw | A | 14680 | 8   | 0 |                    | 1 |
| MV_Schw | T | 14681 | 23  | 0 |                    | 1 |
| MV_Schw | T | 14682 | 68  | 0 | 0.789229943133706  |   |
| MV_Schw | C | 14683 | 45  | 0 |                    | 1 |
| MV_Schw | T | 14684 | 6   | 0 |                    | 1 |
| MV_Schw | A | 14685 | 6   | 0 |                    | 1 |
| MV_Schw | G | 14686 | 264 | 5 |                    | 1 |

|         |   |       |     |   |                    |   |
|---------|---|-------|-----|---|--------------------|---|
| MV_Schw | A | 14687 | 33  | 0 |                    | 1 |
| MV_Schw | T | 14688 | 41  | 0 |                    | 1 |
| MV_Schw | C | 14689 | 27  | 0 |                    | 1 |
| MV_Schw | T | 14690 | 4   | 0 |                    | 1 |
| MV_Schw | G | 14691 | 87  | 1 |                    | 1 |
| MV_Schw | G | 14692 | 147 | 1 | 0.88950624150852   |   |
| MV_Schw | T | 14693 | 114 | 3 | 0.953489044526869  |   |
| MV_Schw | C | 14694 | 25  | 1 |                    | 1 |
| MV_Schw | A | 14695 | 16  | 1 | 0.950262622850522  |   |
| MV_Schw | A | 14696 | 23  | 0 |                    | 1 |
| MV_Schw | A | 14697 | 89  | 3 | 0.715462436038866  |   |
| MV_Schw | G | 14698 | 355 | 3 | 0.241225147582107  |   |
| MV_Schw | G | 14699 | 217 | 1 | 0.355607115956135  |   |
| MV_Schw | G | 14700 | 110 | 0 | 0.385864542883514  |   |
| MV_Schw | A | 14701 | 33  | 0 |                    | 1 |
| MV_Schw | A | 14702 | 74  | 3 | 0.831755077907185  |   |
| MV_Schw | T | 14703 | 85  | 1 |                    | 1 |
| MV_Schw | T | 14704 | 136 | 1 | 0.983041048229953  |   |
| MV_Schw | A | 14705 | 62  | 1 |                    | 1 |
| MV_Schw | G | 14706 | 200 | 3 |                    | 1 |
| MV_Schw | C | 14707 | 207 | 3 |                    | 1 |
| MV_Schw | A | 14708 | 120 | 1 |                    | 1 |
| MV_Schw | C | 14709 | 105 | 1 |                    | 1 |
| MV_Schw | C | 14710 | 81  | 0 | 0.641186461810141  |   |
| MV_Schw | C | 14711 | 33  | 0 |                    | 1 |
| MV_Schw | T | 14712 | 41  | 0 |                    | 1 |
| MV_Schw | A | 14713 | 47  | 1 |                    | 1 |
| MV_Schw | T | 14714 | 31  | 0 |                    | 1 |
| MV_Schw | C | 14715 | 21  | 0 |                    | 1 |
| MV_Schw | C | 14716 | 134 | 1 | 0.66330042087892   |   |
| MV_Schw | C | 14717 | 242 | 2 | 0.528372703117072  |   |
| MV_Schw | T | 14718 | 56  | 1 |                    | 1 |
| MV_Schw | C | 14719 | 475 | 3 | 0.0753786333073858 |   |
| MV_Schw | C | 14720 | 110 | 0 | 0.385864542883514  |   |
| MV_Schw | G | 14721 | 269 | 1 | 0.0493136923590554 |   |
| MV_Schw | A | 14722 | 12  | 0 |                    | 1 |

|         |   |       |     |   |                    |   |
|---------|---|-------|-----|---|--------------------|---|
| MV_Schw | A | 14723 | 19  | 0 |                    | 1 |
| MV_Schw | G | 14724 | 132 | 1 | 0.983041048229953  |   |
| MV_Schw | T | 14725 | 19  | 0 |                    | 1 |
| MV_Schw | T | 14726 | 39  | 0 |                    | 1 |
| MV_Schw | G | 14727 | 126 | 1 | 0.658415249679101  |   |
| MV_Schw | G | 14728 | 217 | 1 | 0.162995980324535  |   |
| MV_Schw | C | 14729 | 112 | 0 | 0.390108970321283  |   |
| MV_Schw | C | 14730 | 138 | 0 | 0.22714633168584   |   |
| MV_Schw | T | 14731 | 14  | 0 |                    | 1 |
| MV_Schw | T | 14732 | 8   | 0 |                    | 1 |
| MV_Schw | G | 14733 | 384 | 1 | 0.0038291456907956 |   |
| MV_Schw | T | 14734 | 12  | 1 | 0.88950624150852   |   |
| MV_Schw | C | 14735 | 318 | 2 | 0.192973852022480  |   |
| MV_Schw | G | 14736 | 56  | 0 | 0.950262622850522  |   |
| MV_Schw | A | 14737 | 4   | 0 |                    | 1 |
| MV_Schw | A | 14738 | 14  | 0 |                    | 1 |
| MV_Schw | C | 14739 | 151 | 0 | 0.166500460032885  |   |
| MV_Schw | A | 14740 | 14  | 0 |                    | 1 |
| MV_Schw | C | 14741 | 33  | 0 |                    | 1 |
| MV_Schw | A | 14742 | 2   | 0 |                    | 1 |
| MV_Schw | G | 14743 | 64  | 0 | 0.789229943133706  |   |
| MV_Schw | A | 14744 | 19  | 0 |                    | 1 |
| MV_Schw | A | 14745 | 21  | 0 |                    | 1 |
| MV_Schw | T | 14746 | 93  | 1 |                    | 1 |
| MV_Schw | G | 14747 | 10  | 0 |                    | 1 |
| MV_Schw | G | 14748 | 99  | 1 | 0.944879389258477  |   |
| MV_Schw | G | 14749 | 76  | 0 | 0.638894311640422  |   |
| MV_Schw | A | 14750 | 37  | 2 | 0.528591092326266  |   |
| MV_Schw | G | 14751 | 114 | 1 | 0.789229943133706  |   |
| MV_Schw | T | 14752 | 2   | 0 |                    | 1 |
| MV_Schw | A | 14753 | 16  | 0 |                    | 1 |
| MV_Schw | G | 14754 | 45  | 0 |                    | 1 |
| MV_Schw | G | 14755 | 219 | 2 | 0.7433964722815    |   |
| MV_Schw | T | 14756 | 21  | 0 |                    | 1 |
| MV_Schw | A | 14757 | 14  | 0 |                    | 1 |
| MV_Schw | A | 14758 | 16  | 0 |                    | 1 |

|         |   |       |       |   |                      |
|---------|---|-------|-------|---|----------------------|
| MV_Schw | T | 14759 | 60    | 0 | 0.957721317456694    |
| MV_Schw | A | 14760 | 19    | 0 | 1                    |
| MV_Schw | T | 14761 | 25    | 0 | 1                    |
| MV_Schw | T | 14762 | 39    | 2 | 0.560243889454362    |
| MV_Schw | G | 14763 | 283   | 3 | 0.822598489333375    |
| MV_Schw | T | 14764 | 41    | 1 | 0.945767847051808    |
| MV_Schw | C | 14765 | 200   | 1 | 0.215757612560076    |
| MV_Schw | A | 14766 | 322   | 0 | 0.00184255492505421  |
| MV_Schw | A | 14767 | 14    | 0 | 1                    |
| MV_Schw | A | 14768 | 39    | 0 | 1                    |
| MV_Schw | G | 14769 | 360   | 1 | 0.0255314021122436   |
| MV_Schw | T | 14770 | 14    | 0 | 1                    |
| MV_Schw | G | 14771 | 35    | 0 | 1                    |
| MV_Schw | C | 14772 | 52    | 0 | 0.950262622850522    |
| MV_Schw | T | 14773 | 91    | 0 | 0.497615650989996    |
| MV_Schw | C | 14774 | 196   | 1 | 0.214586843368945    |
| MV_Schw | T | 14775 | 39    | 1 | 1                    |
| MV_Schw | T | 14776 | 6     | 0 | 1                    |
| MV_Schw | T | 14777 | 23    | 0 | 1                    |
| MV_Schw | A | 14778 | 48    | 0 | 0.950262622850522    |
| MV_Schw | A | 14779 | 174   | 0 | 0.086185329188849    |
| MV_Schw | C | 14780 | 1219  | 7 | 5.57908300698913e-06 |
| MV_Schw | G | 14781 | 605   | 0 | 4.41661140462013e-07 |
| MV_Schw | G | 14782 | 2329  | 0 | 2.5580005492157e-29  |
| MV_Schw | G | 14783 | 421   | 0 | 8.7686951289731e-05  |
| MV_Schw | A | 14784 | 273   | 0 | 0.00834402009997063  |
| MV_Schw | G | 14785 | 515   | 1 | 0.00074194586052895  |
| MV_Schw | G | 14786 | 4236  | 2 | 1.9648966756643e-48  |
| MV_Schw | C | 14787 | 11265 | 4 | .92707464481486e-133 |
| MV_Schw | C | 14788 | 4236  | 5 | 8.11640303093837e-42 |
| MV_Schw | C | 14789 | 6473  | 2 | 5.82337304651442e-77 |
| MV_Schw | G | 14790 | 2643  | 1 | 6.14892193293951e-30 |
| MV_Schw | A | 14791 | 959   | 0 | 1.57097376982161e-11 |
| MV_Schw | A | 14792 | 1574  | 1 | 2.05531803347701e-16 |
| MV_Schw | G | 14793 | 2484  | 0 | 2.62530580093748e-31 |
| MV_Schw | T | 14794 | 33    | 0 | 1                    |

|         |   |       |       |                        |
|---------|---|-------|-------|------------------------|
| MV_Schw | C | 14795 | 5318  | 4 9.29796479734555e-58 |
| MV_Schw | A | 14796 | 403   | 0 0.000204581716830911 |
| MV_Schw | C | 14797 | 2595  | 5 2.36194479732446e-22 |
| MV_Schw | G | 14798 | 996   | 3 6.77606159386548e-07 |
| MV_Schw | T | 14799 | 1641  | 0 2.56270747289406e-20 |
| MV_Schw | G | 14800 | 1101  | 3 7.19118845940295e-09 |
| MV_Schw | G | 14801 | 922   | 1 1.22471932455381e-09 |
| MV_Schw | G | 14802 | 905   | 0 6.97889911723565e-11 |
| MV_Schw | T | 14803 | 1802  | 1 9.86735379750227e-21 |
| MV_Schw | A | 14804 | 8174  | 2 9.37784769356546e-99 |
| MV_Schw | G | 14805 | 2172  | 1 1.65583809508011e-25 |
| MV_Schw | G | 14806 | 3281  | 0 1.23443843143488e-41 |
| MV_Schw | C | 14807 | 93    | 1 1                    |
| MV_Schw | A | 14808 | 316   | 0 0.00177078532209268  |
| MV_Schw | G | 14809 | 1436  | 0 1.18302803003047e-17 |
| MV_Schw | T | 14810 | 2490  | 1 1.92034060191307e-29 |
| MV_Schw | G | 14811 | 6616  | 1 1.6796083861111e-82  |
| MV_Schw | T | 14812 | 198   | 0 0.0437447203304695   |
| MV_Schw | A | 14813 | 130   | 0 0.222002676269896    |
| MV_Schw | G | 14814 | 6574  | 0 2.54493435432106e-84 |
| MV_Schw | A | 14815 | 1986  | 2 2.57016712735998e-20 |
| MV_Schw | T | 14816 | 531   | 0 4.51110001886982e-06 |
| MV_Schw | T | 14817 | 360   | 1 0.00505637410125381  |
| MV_Schw | G | 14818 | 364   | 0 0.0006336154867726   |
| MV_Schw | C | 14819 | 8634  | 3 .84454877541976e-101 |
| MV_Schw | T | 14820 | 3271  | 1 1.53773414176138e-39 |
| MV_Schw | T | 14821 | 3800  | 1 2.59554077893257e-46 |
| MV_Schw | C | 14822 | 11701 | 4 .35399673010063e-138 |
| MV_Schw | A | 14823 | 409   | 0 0.000128972339227062 |
| MV_Schw | A | 14824 | 1085  | 0 3.3268996690475e-13  |
| MV_Schw | T | 14825 | 1709  | 1 1.35616471063302e-19 |
| MV_Schw | T | 14826 | 1895  | 0 1.17357687547283e-23 |
| MV_Schw | T | 14827 | 240   | 0 0.0158394533614316   |
| MV_Schw | C | 14828 | 1678  | 0 8.01337197241661e-21 |
| MV_Schw | A | 14829 | 2539  | 1 4.11647179299712e-30 |
| MV_Schw | T | 14830 | 6481  | 0 6.02587243181859e-83 |

|         |   |       |       |   |                      |
|---------|---|-------|-------|---|----------------------|
| MV_Schw | A | 14831 | 473   | 0 | 1.948341079107e-05   |
| MV_Schw | G | 14832 | 1448  | 0 | 7.93623432735401e-18 |
| MV_Schw | T | 14833 | 81    | 0 | 0.641186461810141    |
| MV_Schw | T | 14834 | 1318  | 1 | 2.09636526808682e-13 |
| MV_Schw | A | 14835 | 829   | 1 | 1.62052158837974e-08 |
| MV_Schw | G | 14836 | 10858 | 3 | .68700889404762e-131 |
| MV_Schw | T | 14837 | 353   | 1 | 0.00730629863736222  |
| MV_Schw | A | 14838 | 829   | 1 | 1.62052158837974e-08 |
| MV_Schw | A | 14839 | 362   | 0 | J.000616568881242944 |
| MV_Schw | T | 14840 | 756   | 1 | 9.88655415781707e-08 |
| MV_Schw | A | 14841 | 564   | 0 | 1.35952714775048e-06 |
| MV_Schw | T | 14842 | 486   | 0 | 1.33465070434441e-05 |
| MV_Schw | C | 14843 | 1636  | 1 | 1.35623582044838e-18 |
| MV_Schw | C | 14844 | 9108  | 2 | .11731761972266e-110 |
| MV_Schw | C | 14845 | 1442  | 0 | 7.55754988966544e-18 |
| MV_Schw | T | 14846 | 541   | 0 | 2.97512457574038e-06 |
| MV_Schw | A | 14847 | 1019  | 0 | 2.23202886427951e-12 |
| MV_Schw | C | 14848 | 517   | 0 | 6.55315586302204e-06 |
| MV_Schw | C | 14849 | 2527  | 1 | 6.05611541742071e-30 |
| MV_Schw | T | 14850 | 167   | 0 | 0.124094801360285    |
| MV_Schw | C | 14851 | 2264  | 0 | 1.72879278081603e-28 |
| MV_Schw | T | 14852 | 81    | 0 | 0.641186461810141    |
| MV_Schw | A | 14853 | 605   | 0 | 4.41661140462013e-07 |
| MV_Schw | G | 14854 | 1888  | 0 | 1.83772311147825e-23 |
| MV_Schw | T | 14855 | 630   | 0 | 2.06200815969165e-07 |
| MV_Schw | G | 14856 | 3610  | 0 | 8.93340944269116e-46 |
| MV_Schw | T | 14857 | 1841  | 0 | 5.35558456506106e-23 |
| MV_Schw | G | 14858 | 3694  | 0 | 5.9521728664277e-47  |
| MV_Schw | G | 14859 | 10182 | 2 | .06888275446532e-124 |
| MV_Schw | G | 14860 | 5320  | 3 | 1.45751126611159e-60 |
| MV_Schw | G | 14861 | 7826  | 1 | 3.46903875491837e-96 |
| MV_Schw | T | 14862 | 1399  | 0 | 3.84338434107394e-17 |
| MV_Schw | T | 14863 | 205   | 0 | 0.0461495798537483   |
| MV_Schw | T | 14864 | 3740  | 1 | 1.72926619920111e-45 |
| MV_Schw | A | 14865 | 4812  | 1 | 3.12088972865229e-59 |
| MV_Schw | T | 14866 | 3515  | 1 | 1.10863108013627e-42 |

|         |   |       |       |                        |
|---------|---|-------|-------|------------------------|
| MV_Schw | C | 14867 | 6357  | 1 2.74914476902965e-77 |
| MV_Schw | C | 14868 | 3324  | 1 3.33678003501489e-40 |
| MV_Schw | A | 14869 | 2004  | 0 5.86221184801153e-25 |
| MV_Schw | T | 14870 | 12575 | 2 .59806135618807e-155 |
| MV_Schw | T | 14871 | 1793  | 0 2.51135525142596e-22 |
| MV_Schw | C | 14872 | 12035 | 2 .25708347134206e-148 |
| MV_Schw | A | 14873 | 3043  | 1 1.49256017560652e-36 |
| MV_Schw | G | 14874 | 1752  | 1 4.47684203555181e-20 |
| MV_Schw | A | 14875 | 4527  | 2 5.24540705057083e-52 |
| MV_Schw | T | 14876 | 3442  | 0 1.27140025409004e-43 |
| MV_Schw | A | 14877 | 469   | 0 1.93875379152911e-05 |
| MV_Schw | T | 14878 | 1643  | 1 8.92861106184468e-19 |
| MV_Schw | A | 14879 | 1422  | 1 5.37663427804951e-16 |
| MV_Schw | G | 14880 | 4942  | 2 1.74211373008108e-57 |
| MV_Schw | A | 14881 | 1353  | 1 5.49398604801057e-15 |
| MV_Schw | G | 14882 | 1521  | 0 7.66312964358801e-19 |
| MV_Schw | A | 14883 | 829   | 1 1.62052158837974e-08 |
| MV_Schw | C | 14884 | 2605  | 1 1.90213833514168e-29 |
| MV_Schw | C | 14885 | 3203  | 2 2.49069073594878e-35 |
| MV_Schw | T | 14886 | 424   | 0 8.99078052194206e-05 |
| MV_Schw | T | 14887 | 3004  | 1 4.70175149984226e-36 |
| MV_Schw | G | 14888 | 11944 | 5 .03553771548399e-138 |
| MV_Schw | C | 14889 | 3558  | 7 1.44690158511793e-30 |
| MV_Schw | C | 14890 | 3793  | 1 2.37528294328268e-44 |
| MV_Schw | T | 14891 | 1546  | 0 3.56041521316391e-19 |
| MV_Schw | G | 14892 | 4246  | 1 6.3825033217587e-52  |
| MV_Schw | A | 14893 | 176   | 1 0.34703042205032     |
| MV_Schw | C | 14894 | 15325 | 5 .34489066510955e-182 |
| MV_Schw | A | 14895 | 176   | 1 0.648224297390367    |
| MV_Schw | A | 14896 | 1203  | 0 1.11077823124742e-14 |
| MV_Schw | A | 14897 | 1213  | 0 7.37267395121326e-15 |
| MV_Schw | G | 14898 | 2913  | 1 6.71361743146533e-35 |
| MV_Schw | A | 14899 | 824   | 1 1.55109609345413e-08 |
| MV_Schw | T | 14900 | 632   | 1 4.0745248383131e-06  |
| MV_Schw | A | 14901 | 376   | 0 0.000429156299701183 |
| MV_Schw | C | 14902 | 1254  | 0 2.41562859378736e-15 |

|         |   |       |       |   |                       |
|---------|---|-------|-------|---|-----------------------|
| MV_Schw | T | 14903 | 593   | 0 | 6.5144684343737e-07   |
| MV_Schw | A | 14904 | 184   | 0 | 0.060993248324147     |
| MV_Schw | T | 14905 | 1250  | 0 | 2.32978859048866e-15  |
| MV_Schw | A | 14906 | 1186  | 0 | 1.55175349968809e-14  |
| MV_Schw | G | 14907 | 1397  | 1 | 1.14462906316046e-15  |
| MV_Schw | A | 14908 | 1397  | 1 | 2.30992204099541e-14  |
| MV_Schw | G | 14909 | 1202  | 0 | 1.08409521091678e-14  |
| MV_Schw | A | 14910 | 203   | 1 | 0.218380248770346     |
| MV_Schw | A | 14911 | 508   | 0 | 1.00516136460597e-05  |
| MV_Schw | G | 14912 | 2630  | 3 | 4.27999422294039e-27  |
| MV_Schw | C | 14913 | 442   | 0 | 6.5293982278993e-05   |
| MV_Schw | T | 14914 | 884   | 1 | 3.74534181656131e-09  |
| MV_Schw | A | 14915 | 853   | 0 | 3.19960077134814e-10  |
| MV_Schw | G | 14916 | 7860  | 6 | 2.32706218289950e-85  |
| MV_Schw | A | 14917 | 2388  | 2 | 2.584683788327e-25    |
| MV_Schw | G | 14918 | 2678  | 1 | 6.26561587518124e-32  |
| MV_Schw | G | 14919 | 1806  | 1 | 1.03155242369253e-20  |
| MV_Schw | A | 14920 | 221   | 0 | 0.0221567686996876    |
| MV_Schw | A | 14921 | 595   | 1 | 1.25903180054441e-05  |
| MV_Schw | T | 14922 | 2899  | 2 | 1.28078568037137e-31  |
| MV_Schw | T | 14923 | 2407  | 0 | 2.59309529516104e-30  |
| MV_Schw | G | 14924 | 3002  | 0 | 5.73000789054789e-38  |
| MV_Schw | G | 14925 | 802   | 1 | 3.379313327444696e-08 |
| MV_Schw | C | 14926 | 14699 | 3 | .52717462178679e-178  |
| MV_Schw | A | 14927 | 802   | 0 | 1.4948870897719e-09   |
| MV_Schw | G | 14928 | 2655  | 1 | 1.35196328260252e-31  |
| MV_Schw | C | 14929 | 1277  | 0 | 1.09923365553527e-15  |
| MV_Schw | C | 14930 | 1242  | 0 | 3.60219953199458e-15  |
| MV_Schw | A | 14931 | 1399  | 0 | 3.84338434107394e-17  |
| MV_Schw | T | 14932 | 1624  | 1 | 2.01610207245853e-18  |
| MV_Schw | C | 14933 | 1595  | 0 | 7.56740999811869e-20  |
| MV_Schw | T | 14934 | 225   | 1 | 0.120869955174813     |
| MV_Schw | T | 14935 | 1911  | 0 | 8.23406380092862e-24  |
| MV_Schw | A | 14936 | 651   | 0 | 9.50347109229743e-08  |
| MV_Schw | T | 14937 | 1539  | 1 | 3.97321867023759e-16  |
| MV_Schw | C | 14938 | 3905  | 0 | 1.34305417268125e-49  |



|         |   |       |       |                        |
|---------|---|-------|-------|------------------------|
| MV_Schw | G | 14939 | 9729  | 1 8.7876319512983e-123 |
| MV_Schw | A | 14940 | 785   | 0 2.09984470524133e-09 |
| MV_Schw | T | 14941 | 5420  | 1 3.68494284289403e-65 |
| MV_Schw | G | 14942 | 10081 | 1 .22604622996751e-125 |
| MV_Schw | G | 14943 | 1504  | 0 1.10476849269543e-18 |
| MV_Schw | C | 14944 | 13998 | 0 .43032010135897e-180 |
| MV_Schw | T | 14945 | 471   | 0 1.93875379152911e-05 |
| MV_Schw | C | 14946 | 12986 | 1 .37152649759904e-164 |
| MV_Schw | T | 14947 | 903   | 0 6.85215456759668e-11 |
| MV_Schw | G | 14948 | 12599 | 1 2.0719439515252e-157 |
| MV_Schw | C | 14949 | 2903  | 1 3.2786490907471e-33  |
| MV_Schw | T | 14950 | 3638  | 1 3.65903859996826e-44 |
| MV_Schw | C | 14951 | 3674  | 1 1.17070989515044e-44 |
| MV_Schw | C | 14952 | 2171  | 1 7.02548338795494e-24 |
| MV_Schw | T | 14953 | 597   | 0 6.83289635695745e-07 |
| MV_Schw | G | 14954 | 4134  | 1 2.10196075949147e-50 |
| MV_Schw | G | 14955 | 9599  | 2 .48046567182858e-117 |
| MV_Schw | G | 14956 | 5903  | 1 1.75144660167207e-71 |
| MV_Schw | C | 14957 | 4295  | 1 1.35994615299216e-52 |
| MV_Schw | A | 14958 | 859   | 0 2.09850510354154e-10 |
| MV_Schw | A | 14959 | 519   | 1 7.13522343509124e-05 |
| MV_Schw | A | 14960 | 1267  | 0 1.66716438051838e-15 |
| MV_Schw | A | 14961 | 1986  | 0 8.0920789347929e-25  |
| MV_Schw | T | 14962 | 3634  | 0 4.0576077549463e-46  |
| MV_Schw | A | 14963 | 390   | 0 0.000296027697709419 |
| MV_Schw | G | 14964 | 696   | 1 6.36851519680802e-07 |
| MV_Schw | G | 14965 | 3806  | 1 2.66461670988236e-46 |
| MV_Schw | A | 14966 | 1085  | 0 3.3268996690475e-13  |
| MV_Schw | T | 14967 | 1012  | 0 3.46990970422983e-12 |
| MV_Schw | C | 14968 | 1459  | 0 5.32812581846618e-18 |
| MV_Schw | A | 14969 | 329   | 0 0.00122977347158906  |
| MV_Schw | A | 14970 | 207   | 0 0.0469760201915419   |
| MV_Schw | T | 14971 | 634   | 1 3.25314555139048e-05 |
| MV_Schw | A | 14972 | 1015  | 2 1.26053598379366e-08 |
| MV_Schw | C | 14973 | 3452  | 1 7.54024123987068e-42 |
| MV_Schw | T | 14974 | 3591  | 1 1.78687678720454e-43 |

|         |   |       |       |   |                      |
|---------|---|-------|-------|---|----------------------|
| MV_Schw | G | 14975 | 1996  | 0 | 5.4534780418171e-25  |
| MV_Schw | G | 14976 | 5562  | 1 | 5.48931460591354e-67 |
| MV_Schw | T | 14977 | 335   | 0 | 0.00128311301299652  |
| MV_Schw | G | 14978 | 4062  | 1 | 8.24932469002896e-48 |
| MV_Schw | A | 14979 | 1217  | 0 | 7.72446395346827e-15 |
| MV_Schw | T | 14980 | 1273  | 0 | 1.07767130685071e-15 |
| MV_Schw | T | 14981 | 3041  | 1 | 7.91196234701734e-35 |
| MV_Schw | A | 14982 | 692   | 0 | 3.02241910276187e-08 |
| MV_Schw | A | 14983 | 1107  | 1 | 6.73542372840933e-12 |
| MV_Schw | G | 14984 | 2771  | 1 | 4.3903964322792e-33  |
| MV_Schw | C | 14985 | 5479  | 1 | 5.15823020412985e-66 |
| MV_Schw | T | 14986 | 969   | 0 | 1.02459910771212e-11 |
| MV_Schw | T | 14987 | 760   | 1 | 9.96079130053354e-08 |
| MV_Schw | A | 14988 | 1198  | 0 | 1.05564375061948e-14 |
| MV_Schw | T | 14989 | 1791  | 1 | 1.45474212727798e-20 |
| MV_Schw | G | 14990 | 2217  | 1 | 5.46708796297683e-26 |
| MV_Schw | C | 14991 | 1215  | 0 | 7.52315556108096e-15 |
| MV_Schw | C | 14992 | 1981  | 1 | 4.90149728860117e-23 |
| MV_Schw | T | 14993 | 560   | 0 | 1.35347886865167e-06 |
| MV_Schw | T | 14994 | 2054  | 0 | 1.25022340035415e-25 |
| MV_Schw | T | 14995 | 1465  | 0 | 3.5070979174003e-18  |
| MV_Schw | C | 14996 | 11709 | 1 | .81764382235639e-146 |
| MV_Schw | A | 14997 | 1816  | 0 | 1.15826989489663e-22 |
| MV_Schw | G | 14998 | 9440  | 1 | .18480935996409e-117 |
| MV_Schw | C | 14999 | 6062  | 3 | 1.85171441252047e-68 |
| MV_Schw | G | 15000 | 3655  | 1 | 2.67757133356374e-44 |
| MV_Schw | G | 15001 | 3380  | 1 | 7.41859111500141e-41 |
| MV_Schw | G | 15002 | 5153  | 1 | 9.75325286665566e-64 |
| MV_Schw | G | 15003 | 2862  | 1 | 3.10363384915128e-34 |
| MV_Schw | A | 15004 | 6376  | 1 | 2.01044023294521e-77 |
| MV_Schw | T | 15005 | 1795  | 0 | 2.55539820015704e-22 |
| MV_Schw | T | 15006 | 888   | 1 | 2.39652817673133e-09 |
| MV_Schw | T | 15007 | 486   | 0 | 1.33465070434441e-05 |
| MV_Schw | T | 15008 | 2795  | 1 | 2.02907368592089e-33 |
| MV_Schw | G | 15009 | 6963  | 1 | 5.46104964836334e-87 |
| MV_Schw | T | 15010 | 2855  | 2 | 3.77269030781922e-31 |

|         |   |       |      |                        |
|---------|---|-------|------|------------------------|
| MV_Schw | T | 15011 | 1459 | 1 1.74681837218093e-16 |
| MV_Schw | C | 15012 | 7143 | 3 2.97383132913015e-82 |
| MV_Schw | A | 15013 | 589  | 0 6.35831285602973e-07 |
| MV_Schw | G | 15014 | 6818 | 3 1.13268056093022e-79 |
| MV_Schw | G | 15015 | 5953 | 1 3.81486798103626e-72 |
| MV_Schw | G | 15016 | 4203 | 1 1.93703897779237e-51 |
| MV_Schw | A | 15017 | 438  | 0 6.21217236865893e-05 |
| MV_Schw | T | 15018 | 1105 | 1 7.35926694954176e-11 |
| MV_Schw | T | 15019 | 587  | 0 6.33705547453606e-07 |
| MV_Schw | T | 15020 | 1975 | 0 1.20562428074216e-24 |
| MV_Schw | A | 15021 | 581  | 1 1.80355643096592e-05 |
| MV_Schw | T | 15022 | 453  | 1 0.000435524603864659 |
| MV_Schw | A | 15023 | 2581 | 3 1.88403601681550e-26 |
| MV_Schw | A | 15024 | 281  | 0 0.0054651270080729   |
| MV_Schw | G | 15025 | 2804 | 3 6.2547760752925e-28  |
| MV_Schw | T | 15026 | 39   | 0 1                    |
| MV_Schw | T | 15027 | 269  | 1 0.0493136923590554   |
| MV_Schw | A | 15028 | 465  | 0 2.97770659573949e-05 |
| MV_Schw | T | 15029 | 1380 | 0 5.17704378312538e-17 |
| MV_Schw | G | 15030 | 2853 | 2 3.77269030781922e-31 |
| MV_Schw | T | 15031 | 682  | 1 7.79971405409605e-06 |
| MV_Schw | A | 15032 | 1161 | 0 3.34340947184945e-14 |
| MV_Schw | G | 15033 | 436  | 0 6.10735657108213e-05 |
| MV_Schw | G | 15034 | 339  | 0 0.000838801840787778 |
| MV_Schw | G | 15035 | 2295 | 0 8.1937869187747e-29  |
| MV_Schw | T | 15036 | 845  | 1 1.15747302859242e-08 |
| MV_Schw | C | 15037 | 2651 | 2 1.51732328052557e-28 |
| MV_Schw | T | 15038 | 986  | 1 1.97772128590666e-09 |
| MV_Schw | C | 15039 | 729  | 1 2.77341384550557e-06 |
| MV_Schw | A | 15040 | 3862 | 0 4.10643416008809e-49 |
| MV_Schw | T | 15041 | 1207 | 0 7.20194321726052e-15 |
| MV_Schw | T | 15042 | 386  | 1 0.00252013751730551  |
| MV_Schw | A | 15043 | 347  | 1 0.00709075117762907  |
| MV_Schw | T | 15044 | 593  | 1 1.23071540206373e-05 |
| MV_Schw | A | 15045 | 2318 | 1 1.20603865016543e-25 |
| MV_Schw | G | 15046 | 4506 | 0 1.86310847457434e-57 |

|         |   |       |       |   |                      |
|---------|---|-------|-------|---|----------------------|
| MV_Schw | A | 15047 | 196   | 0 | 0.0437133877334182   |
| MV_Schw | G | 15048 | 1091  | 1 | 9.43900383805873e-12 |
| MV_Schw | A | 15049 | 471   | 1 | 0.000310228052792564 |
| MV_Schw | A | 15050 | 1922  | 0 | 5.54729493545903e-24 |
| MV_Schw | G | 15051 | 6655  | 1 | 5.38157045521967e-83 |
| MV_Schw | T | 15052 | 1450  | 0 | 8.15779493775658e-18 |
| MV_Schw | G | 15053 | 1891  | 0 | 1.15810350089500e-23 |
| MV_Schw | A | 15054 | 298   | 0 | 0.00396643007412919  |
| MV_Schw | A | 15055 | 1764  | 1 | 3.04163743142937e-20 |
| MV_Schw | C | 15056 | 5754  | 1 | 2.22993087704784e-71 |
| MV_Schw | C | 15057 | 6504  | 1 | 4.30315919725628e-79 |
| MV_Schw | T | 15058 | 116   | 0 | 0.296710762771661    |
| MV_Schw | T | 15059 | 903   | 0 | 6.85215456759668e-11 |
| MV_Schw | G | 15060 | 5765  | 0 | 7.96179853012645e-74 |
| MV_Schw | T | 15061 | 6915  | 1 | 2.24362090828922e-84 |
| MV_Schw | A | 15062 | 1597  | 0 | 7.59376790099526e-20 |
| MV_Schw | T | 15063 | 1052  | 0 | 6.90902325002347e-13 |
| MV_Schw | A | 15064 | 223   | 0 | 0.0221567686996876   |
| MV_Schw | C | 15065 | 337   | 0 | 0.00131350930751039  |
| MV_Schw | C | 15066 | 9560  | 1 | .23273791169847e-120 |
| MV_Schw | C | 15067 | 5942  | 0 | 5.88884602769626e-76 |
| MV_Schw | T | 15068 | 4174  | 1 | 4.10259253306811e-51 |
| MV_Schw | A | 15069 | 647   | 0 | 1.46284737828218e-07 |
| MV_Schw | G | 15070 | 6442  | 1 | 2.26305674878317e-80 |
| MV_Schw | A | 15071 | 372   | 1 | 0.0188268016494874   |
| MV_Schw | T | 15072 | 1184  | 0 | 1.53667596110583e-14 |
| MV_Schw | A | 15073 | 231   | 0 | 0.0230242315581746   |
| MV_Schw | C | 15074 | 6343  | 0 | 2.54358790927326e-81 |
| MV_Schw | A | 15075 | 3676  | 2 | 2.04527089954565e-41 |
| MV_Schw | G | 15076 | 3215  | 0 | 1.34838239231221e-40 |
| MV_Schw | C | 15077 | 12287 | 5 | .21710176158411e-144 |
| MV_Schw | A | 15078 | 862   | 0 | 2.12087494534024e-10 |
| MV_Schw | A | 15079 | 996   | 0 | 4.8591090129366e-12  |
| MV_Schw | C | 15080 | 7589  | 0 | 1.68601167706676e-97 |
| MV_Schw | T | 15081 | 3866  | 1 | 3.91303760011519e-47 |
| MV_Schw | T | 15082 | 190   | 0 | 0.0626240647804826   |

|         |   |       |       |                        |
|---------|---|-------|-------|------------------------|
| MV_Schw | C | 15083 | 1640  | 0 2.50554428944595e-20 |
| MV_Schw | A | 15084 | 4333  | 0 4.34071313919113e-55 |
| MV_Schw | T | 15085 | 686   | 0 4.68151294743551e-08 |
| MV_Schw | C | 15086 | 3374  | 1 7.25372982967124e-41 |
| MV_Schw | T | 15087 | 293   | 0 0.00374831899291936  |
| MV_Schw | C | 15088 | 645   | 0 1.43363992786126e-07 |
| MV_Schw | T | 15089 | 112   | 0 0.390108970321283    |
| MV_Schw | A | 15090 | 2045  | 1 7.32878898670224e-24 |
| MV_Schw | C | 15091 | 6079  | 0 8.26013288240846e-78 |
| MV_Schw | T | 15092 | 297   | 0 0.00386997644741331  |
| MV_Schw | G | 15093 | 531   | 0 4.51110001886982e-06 |
| MV_Schw | A | 15094 | 169   | 0 0.0850400511116103   |
| MV_Schw | A | 15095 | 839   | 0 4.65288535221974e-10 |
| MV_Schw | T | 15096 | 1758  | 1 2.96668110459314e-20 |
| MV_Schw | C | 15097 | 1211  | 1 2.11832235556202e-13 |
| MV_Schw | T | 15098 | 85    | 0 0.648224297390367    |
| MV_Schw | T | 15099 | 260   | 0 0.01187682014109     |
| MV_Schw | A | 15100 | 1085  | 0 3.3268996690475e-13  |
| MV_Schw | T | 15101 | 2512  | 2 9.72451941407034e-27 |
| MV_Schw | T | 15102 | 568   | 0 1.39912799611384e-06 |
| MV_Schw | T | 15103 | 672   | 0 6.8094717108743e-08  |
| MV_Schw | G | 15104 | 308   | 0 0.00264541752797916  |
| MV_Schw | G | 15105 | 1632  | 0 3.9313101600527e-20  |
| MV_Schw | T | 15106 | 515   | 2 0.00378647932085024  |
| MV_Schw | T | 15107 | 360   | 0 0.000603140372929285 |
| MV_Schw | A | 15108 | 682   | 0 4.50385496215057e-08 |
| MV_Schw | T | 15109 | 1818  | 1 6.99053373118151e-21 |
| MV_Schw | G | 15110 | 6021  | 2 3.54529566099254e-71 |
| MV_Schw | A | 15111 | 1229  | 0 5.20794029399302e-15 |
| MV_Schw | C | 15112 | 14273 | 6 .12596395348166e-166 |
| MV_Schw | A | 15113 | 1229  | 0 5.20794029399302e-15 |
| MV_Schw | G | 15114 | 1198  | 0 1.05564375061948e-14 |
| MV_Schw | A | 15115 | 671   | 0 6.6718636300469e-08  |
| MV_Schw | T | 15116 | 1484  | 1 8.2192577664273e-17  |
| MV_Schw | C | 15117 | 14017 | 1 9.8528198925825e-178 |
| MV_Schw | T | 15118 | 868   | 0 2.25339248858533e-10 |

|         |   |       |       |   |                      |
|---------|---|-------|-------|---|----------------------|
| MV_Schw | C | 15119 | 2554  | 1 | 8.5093639304238e-29  |
| MV_Schw | A | 15120 | 665   | 0 | 6.4876294460158e-08  |
| MV_Schw | A | 15121 | 4802  | 2 | 1.12365836184116e-55 |
| MV_Schw | G | 15122 | 4331  | 2 | 1.48149021888987e-49 |
| MV_Schw | G | 15123 | 1248  | 0 | 2.31149657748333e-15 |
| MV_Schw | C | 15124 | 798   | 0 | 1.43761268685108e-09 |
| MV_Schw | T | 15125 | 733   | 0 | 9.62638419926102e-09 |
| MV_Schw | A | 15126 | 601   | 0 | 4.35085717466987e-07 |
| MV_Schw | A | 15127 | 3357  | 3 | 6.0271687056996e-36  |
| MV_Schw | C | 15128 | 4711  | 1 | 6.85295126928243e-58 |
| MV_Schw | C | 15129 | 10791 | 2 | .03309940104851e-132 |
| MV_Schw | G | 15130 | 3773  | 3 | 3.79757311682024e-41 |
| MV_Schw | G | 15131 | 1849  | 0 | 5.76673367764922e-23 |
| MV_Schw | C | 15132 | 6760  | 1 | 2.54493435432106e-84 |
| MV_Schw | T | 15133 | 3234  | 0 | 5.75611036885487e-41 |
| MV_Schw | A | 15134 | 3872  | 1 | 4.06999102824884e-47 |
| MV_Schw | A | 15135 | 1537  | 0 | 5.35024053008293e-19 |
| MV_Schw | T | 15136 | 3386  | 0 | 5.70755085260593e-43 |
| MV_Schw | G | 15137 | 2475  | 1 | 8.17160256663972e-28 |
| MV_Schw | A | 15138 | 110   | 1 | 0.789229943133706    |
| MV_Schw | A | 15139 | 1205  | 1 | 5.95603379706098e-12 |
| MV_Schw | T | 15140 | 572   | 0 | 1.47537931345750e-06 |
| MV_Schw | C | 15141 | 1738  | 0 | 1.15058463470774e-21 |
| MV_Schw | C | 15142 | 705   | 1 | 4.34454235002959e-07 |
| MV_Schw | T | 15143 | 1221  | 0 | 4.93556683770453e-15 |
| MV_Schw | G | 15144 | 3362  | 3 | 3.98067885838877e-36 |
| MV_Schw | A | 15145 | 6804  | 2 | 3.02392494106536e-81 |
| MV_Schw | A | 15146 | 1271  | 1 | 9.63451147323843e-13 |
| MV_Schw | A | 15147 | 1114  | 0 | 1.62618190985966e-13 |
| MV_Schw | A | 15148 | 287   | 0 | 0.00370071528646678  |
| MV_Schw | G | 15149 | 2481  | 2 | 1.92151896043269e-26 |
| MV_Schw | A | 15150 | 293   | 0 | 0.00374831899291936  |
| MV_Schw | T | 15151 | 740   | 1 | 2.24262497729678e-07 |
| MV_Schw | T | 15152 | 740   | 1 | 2.24262497729678e-07 |
| MV_Schw | A | 15153 | 521   | 1 | 0.0005130463599647   |
| MV_Schw | A | 15154 | 227   | 0 | 0.0224026288296061   |

|         |   |       |      |                        |
|---------|---|-------|------|------------------------|
| MV_Schw | G | 15155 | 959  | 0 1.57097376982161e-11 |
| MV_Schw | C | 15156 | 996  | 1 1.23676110803102e-10 |
| MV_Schw | A | 15157 | 281  | 0 0.0054651270080729   |
| MV_Schw | G | 15158 | 1126 | 0 1.09044914069233e-13 |
| MV_Schw | C | 15159 | 901  | 0 6.76904842423203e-11 |
| MV_Schw | A | 15160 | 2490 | 1 5.65531351700588e-28 |
| MV_Schw | G | 15161 | 1860 | 1 1.46791494429932e-21 |
| MV_Schw | A | 15162 | 101  | 0 0.51781700540984     |
| MV_Schw | T | 15163 | 543  | 1 5.40113038146285e-05 |
| MV_Schw | A | 15164 | 638  | 0 1.38810712996678e-07 |
| MV_Schw | A | 15165 | 2905 | 2 8.51860812183275e-32 |
| MV_Schw | T | 15166 | 1785 | 0 3.92760577478916e-22 |
| MV_Schw | T | 15167 | 351  | 0 0.00091172762226358  |
| MV_Schw | G | 15168 | 8816 | 0 .38332966471243e-113 |
| MV_Schw | A | 15169 | 211  | 0 0.03148485115913     |
| MV_Schw | A | 15170 | 1926 | 1 2.20993893175040e-22 |
| MV_Schw | T | 15171 | 1054 | 0 6.91906475996322e-13 |
| MV_Schw | C | 15172 | 981  | 0 6.92038081467864e-12 |
| MV_Schw | A | 15173 | 579  | 0 9.44491436922526e-07 |
| MV_Schw | T | 15174 | 543  | 0 3.03369012467129e-06 |
| MV_Schw | C | 15175 | 2657 | 0 1.86009615146372e-33 |
| MV_Schw | T | 15176 | 3236 | 1 4.88070781009419e-39 |
| MV_Schw | G | 15177 | 2424 | 0 1.82278506567368e-30 |
| MV_Schw | T | 15178 | 1653 | 1 6.08461263547907e-19 |
| MV_Schw | G | 15179 | 8118 | 1 .86346758397333e-102 |
| MV_Schw | A | 15180 | 1484 | 1 8.2192577664273e-17  |
| MV_Schw | G | 15181 | 5291 | 0 1.20994282549476e-67 |
| MV_Schw | G | 15182 | 1409 | 0 2.48917785476210e-17 |
| MV_Schw | A | 15183 | 893  | 0 1.03673599593703e-10 |
| MV_Schw | C | 15184 | 6275 | 0 2.69915179787206e-80 |
| MV_Schw | T | 15185 | 1713 | 0 2.47384689475025e-21 |
| MV_Schw | T | 15186 | 101  | 0 0.51781700540984     |
| MV_Schw | C | 15187 | 2029 | 0 2.70623469614514e-25 |
| MV_Schw | A | 15188 | 996  | 0 4.8591090129366e-12  |
| MV_Schw | C | 15189 | 6804 | 0 2.58586087303399e-87 |
| MV_Schw | C | 15190 | 7045 | 3 2.04355329015948e-82 |

|         |   |       |      |                        |
|---------|---|-------|------|------------------------|
| MV_Schw | T | 15191 | 7734 | 1 5.42591753251236e-97 |
| MV_Schw | G | 15192 | 2407 | 1 1.78440203124345e-28 |
| MV_Schw | G | 15193 | 1118 | 0 1.02452495324943e-13 |
| MV_Schw | A | 15194 | 1229 | 0 5.20794029399302e-15 |
| MV_Schw | C | 15195 | 8490 | 0 .35168785239159e-109 |
| MV_Schw | T | 15196 | 917  | 0 4.7180618522788e-11  |
| MV_Schw | T | 15197 | 554  | 0 2.03946865526378e-06 |
| MV_Schw | A | 15198 | 729  | 0 9.56777608510523e-09 |
| MV_Schw | T | 15199 | 748  | 0 6.71067626462059e-09 |
| MV_Schw | A | 15200 | 5839 | 1 1.48352772049986e-72 |
| MV_Schw | G | 15201 | 1624 | 0 3.57132818494445e-20 |
| MV_Schw | G | 15202 | 6384 | 0 8.08988438872447e-82 |
| MV_Schw | T | 15203 | 463  | 0 2.92053399975642e-05 |
| MV_Schw | C | 15204 | 1800 | 1 9.7468386384754e-21  |
| MV_Schw | A | 15205 | 328  | 0 0.00122440694427806  |
| MV_Schw | C | 15206 | 8041 | 3 1.34080754776623e-93 |
| MV_Schw | A | 15207 | 1688 | 2 1.27204167972611e-16 |
| MV_Schw | T | 15208 | 859  | 1 8.04253152858602e-09 |
| MV_Schw | C | 15209 | 1692 | 0 5.51506730957602e-21 |
| MV_Schw | C | 15210 | 647  | 0 1.46284737828218e-07 |
| MV_Schw | T | 15211 | 1295 | 0 7.9182499440671e-16  |
| MV_Schw | A | 15212 | 1578 | 0 1.74332947465606e-19 |
| MV_Schw | T | 15213 | 992  | 0 4.68066291936219e-12 |
| MV_Schw | C | 15214 | 2269 | 1 1.21099323973924e-26 |
| MV_Schw | C | 15215 | 3477 | 1 1.94846046790638e-40 |
| MV_Schw | A | 15216 | 605  | 1 8.40475503438195e-06 |
| MV_Schw | T | 15217 | 192  | 0 0.0637677617687036   |
| MV_Schw | T | 15218 | 1680 | 0 8.19840154367744e-21 |
| MV_Schw | A | 15219 | 4279 | 1 1.95311953779782e-52 |
| MV_Schw | A | 15220 | 1669 | 1 4.18149397800882e-19 |
| MV_Schw | G | 15221 | 1056 | 1 1.87037595111299e-11 |
| MV_Schw | C | 15222 | 4502 | 1 2.97046679049957e-55 |
| MV_Schw | A | 15223 | 1079 | 0 3.21785256543600e-13 |
| MV_Schw | A | 15224 | 60   | 1 1                    |
| MV_Schw | C | 15225 | 3946 | 1 4.00599417429487e-48 |
| MV_Schw | T | 15226 | 279  | 0 0.00539683386016816  |



|         |   |       |       |   |                      |
|---------|---|-------|-------|---|----------------------|
| MV_Schw | A | 15227 | 455   | 0 | 4.535557566976e-05   |
| MV_Schw | A | 15228 | 145   | 0 | 0.161503851613234    |
| MV_Schw | G | 15229 | 3930  | 1 | 3.51391339120555e-46 |
| MV_Schw | C | 15230 | 2855  | 1 | 1.50404881507914e-32 |
| MV_Schw | T | 15231 | 1147  | 0 | 4.86647069488137e-14 |
| MV_Schw | G | 15232 | 684   | 0 | 4.57815998507218e-08 |
| MV_Schw | C | 15233 | 1281  | 0 | 1.14747977226995e-15 |
| MV_Schw | A | 15234 | 767   | 1 | 9.36600499673184e-07 |
| MV_Schw | T | 15235 | 376   | 0 | 0.000429156299701183 |
| MV_Schw | A | 15236 | 207   | 0 | 0.0469760201915419   |
| MV_Schw | C | 15237 | 618   | 1 | 5.85764216132517e-06 |
| MV_Schw | A | 15238 | 1787  | 1 | 3.42372514788662e-19 |
| MV_Schw | A | 15239 | 905   | 0 | 6.97889911723565e-11 |
| MV_Schw | G | 15240 | 7579  | 3 | 2.21976741580197e-89 |
| MV_Schw | C | 15241 | 1653  | 0 | 1.72019982216439e-20 |
| MV_Schw | A | 15242 | 891   | 0 | 1.01235897577476e-10 |
| MV_Schw | A | 15243 | 500   | 0 | 9.17885897222951e-06 |
| MV_Schw | T | 15244 | 1543  | 1 | 1.86150162384161e-17 |
| MV_Schw | T | 15245 | 674   | 0 | 6.9909911351315e-08  |
| MV_Schw | G | 15246 | 1331  | 0 | 2.46690908069975e-16 |
| MV_Schw | T | 15247 | 764   | 0 | 4.69241958060894e-09 |
| MV_Schw | G | 15248 | 14738 | 5 | .66944350871421e-173 |
| MV_Schw | G | 15249 | 764   | 1 | 9.20180935106783e-07 |
| MV_Schw | G | 15250 | 2936  | 1 | 3.12271252729054e-35 |
| MV_Schw | A | 15251 | 779   | 1 | 7.38402665470951e-08 |
| MV_Schw | G | 15252 | 3705  | 3 | 5.13739009623323e-39 |
| MV_Schw | A | 15253 | 248   | 0 | 0.0109464716562247   |
| MV_Schw | C | 15254 | 10477 | 5 | .77960161447302e-121 |
| MV_Schw | G | 15255 | 3105  | 1 | 2.19074937118286e-37 |
| MV_Schw | C | 15256 | 1436  | 1 | 3.69575439946648e-16 |
| MV_Schw | A | 15257 | 3614  | 1 | 8.09156196649302e-44 |
| MV_Schw | G | 15258 | 2921  | 1 | 7.3444029921502e-35  |
| MV_Schw | T | 15259 | 767   | 0 | 3.03939088124383e-09 |
| MV_Schw | T | 15260 | 773   | 0 | 3.10215831347887e-09 |
| MV_Schw | A | 15261 | 1202  | 0 | 1.08409521091678e-14 |
| MV_Schw | G | 15262 | 3558  | 3 | 1.43342193322367e-38 |

|         |   |       |      |                        |
|---------|---|-------|------|------------------------|
| MV_Schw | T | 15263 | 1136 | 0 7.15274561209346e-14 |
| MV_Schw | A | 15264 | 1521 | 1 4.17688692472197e-17 |
| MV_Schw | G | 15265 | 6748 | 0 1.84128565207072e-86 |
| MV_Schw | A | 15266 | 659  | 0 9.88655415781707e-08 |
| MV_Schw | G | 15267 | 2944 | 1 3.30674939355187e-35 |
| MV_Schw | G | 15268 | 8157 | 3 1.32779790909230e-96 |
| MV_Schw | T | 15269 | 758  | 1 9.88655415781707e-08 |
| MV_Schw | G | 15270 | 2793 | 1 2.02907368592089e-33 |
| MV_Schw | A | 15271 | 147  | 0 0.162686550333688    |
| MV_Schw | T | 15272 | 8723 | 1 8.1366121171444e-110 |
| MV_Schw | A | 15273 | 5833 | 1 1.79469424872863e-70 |
| MV_Schw | T | 15274 | 306  | 0 0.00260097485570830  |
| MV_Schw | C | 15275 | 1041 | 0 1.00985527303858e-12 |
| MV_Schw | A | 15276 | 430  | 0 6.01062123097195e-05 |
| MV_Schw | A | 15277 | 1616 | 0 5.51432956998724e-20 |
| MV_Schw | T | 15278 | 2207 | 0 1.23448817107449e-27 |
| MV_Schw | C | 15279 | 2359 | 1 8.31588179377838e-28 |
| MV_Schw | C | 15280 | 1151 | 1 1.39509385488590e-12 |
| MV_Schw | T | 15281 | 97   | 0 0.503192867159235    |
| MV_Schw | A | 15282 | 105  | 0 0.37877131423274     |
| MV_Schw | C | 15283 | 1781 | 0 3.7300545488867e-22  |
| MV_Schw | T | 15284 | 97   | 0 0.503192867159235    |
| MV_Schw | C | 15285 | 248  | 0 0.0109464716562247   |
| MV_Schw | T | 15286 | 157  | 0 0.118807954027477    |
| MV_Schw | G | 15287 | 5587 | 0 1.75144660167207e-71 |
| MV_Schw | A | 15288 | 3562 | 1 2.21623428003865e-41 |
| MV_Schw | A | 15289 | 1039 | 0 1.00985527303858e-12 |
| MV_Schw | A | 15290 | 1467 | 0 3.50954254282433e-18 |
| MV_Schw | A | 15291 | 250  | 0 0.0109496584840517   |
| MV_Schw | A | 15292 | 103  | 0 0.37877131423274     |
| MV_Schw | A | 15293 | 186  | 0 0.0611551441006359   |
| MV_Schw | C | 15294 | 3915 | 2 2.45935805507729e-44 |
| MV_Schw | T | 15295 | 178  | 1 0.351232192365447    |
| MV_Schw | T | 15296 | 182  | 0 0.060993248324147    |
| MV_Schw | A | 15297 | 136  | 0 0.224063006917908    |
| MV_Schw | C | 15298 | 1378 | 3 6.62035087389773e-12 |

|         |   |       |      |   |                      |
|---------|---|-------|------|---|----------------------|
| MV_Schw | A | 15299 | 45   | 0 | 1                    |
| MV_Schw | C | 15300 | 103  | 0 | 0.37877131423274     |
| MV_Schw | C | 15301 | 244  | 0 | 0.0163941242041888   |
| MV_Schw | T | 15302 | 223  | 1 | 0.120796610672436    |
| MV_Schw | A | 15303 | 432  | 0 | 6.01062123097195e-05 |
| MV_Schw | T | 15304 | 291  | 0 | 0.00371697541983835  |
| MV_Schw | A | 15305 | 643  | 0 | 1.4100041650925e-07  |
| MV_Schw | G | 15306 | 252  | 1 | 0.0664209032864009   |
| MV_Schw | A | 15307 | 519  | 1 | 7.13522343509124e-05 |
| MV_Schw | G | 15308 | 924  | 1 | 7.8235335143579e-10  |
| MV_Schw | C | 15309 | 1147 | 0 | 4.86647069488137e-14 |
| MV_Schw | A | 15310 | 260  | 0 | 0.01187682014109     |
| MV_Schw | G | 15311 | 2981 | 1 | 3.42554672909046e-34 |
| MV_Schw | G | 15312 | 1004 | 0 | 3.18422806461459e-12 |
| MV_Schw | T | 15313 | 1558 | 0 | 2.40825433548378e-19 |
| MV_Schw | G | 15314 | 1172 | 1 | 6.56220599098129e-13 |
| MV_Schw | C | 15315 | 1486 | 0 | 2.52191708456616e-18 |
| MV_Schw | T | 15316 | 816  | 0 | 1.02964970836016e-09 |
| MV_Schw | G | 15317 | 3097 | 0 | 4.11067790343552e-39 |
| MV_Schw | A | 15318 | 2459 | 1 | 3.91891827047252e-29 |
| MV_Schw | T | 15319 | 1023 | 0 | 2.33621633147124e-12 |
| MV_Schw | C | 15320 | 1700 | 1 | 4.75599605746095e-18 |
| MV_Schw | A | 15321 | 287  | 0 | 0.00370071528646678  |
| MV_Schw | A | 15322 | 1419 | 0 | 1.64620456077558e-17 |
| MV_Schw | T | 15323 | 1328 | 1 | 1.44200891457894e-13 |
| MV_Schw | T | 15324 | 5360 | 0 | 1.87907544706161e-68 |
| MV_Schw | G | 15325 | 3808 | 0 | 1.89765546241214e-48 |
| MV_Schw | C | 15326 | 6508 | 3 | 1.00121886685600e-75 |
| MV_Schw | G | 15327 | 1895 | 0 | 1.17357687547283e-23 |
| MV_Schw | G | 15328 | 4048 | 0 | 1.99882891124169e-51 |
| MV_Schw | G | 15329 | 3926 | 0 | 6.02695415019885e-50 |
| MV_Schw | T | 15330 | 1725 | 0 | 1.68103001909429e-21 |
| MV_Schw | T | 15331 | 5407 | 1 | 5.33098209549352e-65 |
| MV_Schw | G | 15332 | 4924 | 2 | 3.85251400215903e-57 |
| MV_Schw | G | 15333 | 1996 | 1 | 3.40817346943791e-23 |
| MV_Schw | C | 15334 | 4254 | 1 | 4.20807107569511e-52 |

|         |   |       |       |                        |
|---------|---|-------|-------|------------------------|
| MV_Schw | A | 15335 | 5653  | 2 2.40476848447877e-66 |
| MV_Schw | A | 15336 | 740   | 1 2.24262497729678e-07 |
| MV_Schw | T | 15337 | 731   | 0 9.56777608510523e-09 |
| MV_Schw | T | 15338 | 731   | 0 9.56777608510523e-09 |
| MV_Schw | A | 15339 | 4835  | 0 1.37054206785699e-61 |
| MV_Schw | A | 15340 | 1568  | 0 1.63109543035556e-19 |
| MV_Schw | C | 15341 | 11114 | 5 .36025358057084e-128 |
| MV_Schw | G | 15342 | 864   | 1 7.96192567326806e-08 |
| MV_Schw | G | 15343 | 891   | 0 1.01235897577476e-10 |
| MV_Schw | A | 15344 | 403   | 1 0.00179980771690519  |
| MV_Schw | C | 15345 | 1132  | 1 3.17646026597022e-12 |
| MV_Schw | C | 15346 | 4700  | 0 5.94674633478625e-60 |
| MV_Schw | T | 15347 | 128   | 0 0.307480793677112    |
| MV_Schw | A | 15348 | 959   | 0 1.57097376982161e-11 |
| MV_Schw | A | 15349 | 525   | 1 7.34982591968976e-05 |
| MV_Schw | G | 15350 | 7066  | 1 2.23339087636213e-86 |
| MV_Schw | C | 15351 | 1318  | 1 1.06644327421489e-14 |
| MV_Schw | T | 15352 | 709   | 1 4.42599194690295e-07 |
| MV_Schw | G | 15353 | 1116  | 0 1.02452495324943e-13 |
| MV_Schw | T | 15354 | 506   | 1 0.000102077005031043 |
| MV_Schw | G | 15355 | 5041  | 2 1.29822346939515e-58 |
| MV_Schw | C | 15356 | 5506  | 2 1.46493569293543e-64 |
| MV_Schw | A | 15357 | 9996  | 2 .03005275447858e-122 |
| MV_Schw | A | 15358 | 828   | 1 1.59200118175845e-08 |
| MV_Schw | A | 15359 | 1645  | 0 1.64859269004702e-20 |
| MV_Schw | G | 15360 | 8351  | 3 1.56545586604484e-97 |
| MV_Schw | A | 15361 | 6017  | 1 6.8131829412929e-75  |
| MV_Schw | A | 15362 | 455   | 0 4.535557566976e-05   |
| MV_Schw | T | 15363 | 2870  | 1 2.08680902678627e-34 |
| MV_Schw | T | 15364 | 831   | 0 7.32656365148702e-10 |
| MV_Schw | G | 15365 | 3333  | 1 3.65294206541365e-40 |
| MV_Schw | A | 15366 | 1153  | 0 5.19942982563649e-14 |
| MV_Schw | T | 15367 | 1287  | 1 6.8992214824925e-13  |
| MV_Schw | C | 15368 | 4764  | 1 1.02706404875048e-56 |
| MV_Schw | C | 15369 | 779   | 0 3.32879724136236e-09 |
| MV_Schw | A | 15370 | 550   | 0 1.98675366236653e-06 |

|         |   |       |       |                        |
|---------|---|-------|-------|------------------------|
| MV_Schw | C | 15371 | 4510  | 3 4.81692299814747e-49 |
| MV_Schw | C | 15372 | 4814  | 0 1.83142629194565e-61 |
| MV_Schw | A | 15373 | 1172  | 0 2.26350812475368e-14 |
| MV_Schw | T | 15374 | 880   | 1 3.57234895150995e-09 |
| MV_Schw | G | 15375 | 504   | 0 9.48693703037088e-06 |
| MV_Schw | A | 15376 | 731   | 1 2.06752319983173e-07 |
| MV_Schw | T | 15377 | 1550  | 1 2.76000553057011e-16 |
| MV_Schw | G | 15378 | 4138  | 1 1.30182819231890e-50 |
| MV_Schw | T | 15379 | 461   | 0 2.87791954107156e-05 |
| MV_Schw | T | 15380 | 240   | 0 0.0158394533614316   |
| MV_Schw | G | 15381 | 1267  | 0 1.66716438051838e-15 |
| MV_Schw | C | 15382 | 2736  | 1 1.43741105769954e-32 |
| MV_Schw | C | 15383 | 7533  | 2 1.7464794951817e-90  |
| MV_Schw | T | 15384 | 829   | 0 7.09756615609788e-10 |
| MV_Schw | C | 15385 | 1244  | 0 3.71402971510022e-15 |
| MV_Schw | A | 15386 | 539   | 0 2.93476087426298e-06 |
| MV_Schw | G | 15387 | 2265  | 1 1.18313618470983e-26 |
| MV_Schw | G | 15388 | 3320  | 1 5.28871212392899e-40 |
| MV_Schw | G | 15389 | 8767  | 1 .75544490937405e-110 |
| MV_Schw | C | 15390 | 333   | 0 0.00125895595678960  |
| MV_Schw | A | 15391 | 922   | 0 3.11076161967357e-11 |
| MV_Schw | A | 15392 | 459   | 0 2.85225466002296e-05 |
| MV_Schw | G | 15393 | 4347  | 0 3.01673529805534e-55 |
| MV_Schw | A | 15394 | 715   | 0 2.28694713845038e-08 |
| MV_Schw | T | 15395 | 948   | 0 2.35499725054926e-11 |
| MV_Schw | G | 15396 | 2192  | 1 3.19707081756641e-24 |
| MV_Schw | G | 15397 | 1322  | 0 3.76592518242398e-16 |
| MV_Schw | A | 15398 | 1002  | 0 3.17646026597022e-12 |
| MV_Schw | T | 15399 | 1200  | 0 1.06644327421489e-14 |
| MV_Schw | T | 15400 | 843   | 0 4.88972926763393e-10 |
| MV_Schw | G | 15401 | 4568  | 0 2.76474285500167e-58 |
| MV_Schw | C | 15402 | 10934 | 4 .01046850594713e-128 |
| MV_Schw | T | 15403 | 647   | 0 1.46284737828218e-07 |
| MV_Schw | T | 15404 | 12523 | 1 .14968274564556e-158 |
| MV_Schw | A | 15405 | 291   | 1 0.0263398139691685   |
| MV_Schw | A | 15406 | 1401  | 0 2.36186426897171e-17 |

|         |   |       |       |                        |
|---------|---|-------|-------|------------------------|
| MV_Schw | T | 15407 | 810   | 0 9.76030167426468e-10 |
| MV_Schw | T | 15408 | 1833  | 1 1.17572627755492e-19 |
| MV_Schw | C | 15409 | 3362  | 1 5.94636757218649e-39 |
| MV_Schw | T | 15410 | 314   | 0 0.00176845260235514  |
| MV_Schw | A | 15411 | 337   | 0 0.00131350930751039  |
| MV_Schw | T | 15412 | 2029  | 0 2.70623469614514e-25 |
| MV_Schw | A | 15413 | 287   | 1 0.0368535484835669   |
| MV_Schw | C | 15414 | 3684  | 0 8.81083280805457e-47 |
| MV_Schw | T | 15415 | 1198  | 0 1.05564375061948e-14 |
| MV_Schw | C | 15416 | 184   | 0 0.060993248324147    |
| MV_Schw | A | 15417 | 2448  | 1 5.77654727645982e-29 |
| MV_Schw | T | 15418 | 207   | 0 0.0469760201915419   |
| MV_Schw | C | 15419 | 1258  | 1 7.10163070623807e-14 |
| MV_Schw | C | 15420 | 917   | 0 4.7180618522788e-11  |
| MV_Schw | T | 15421 | 1426  | 0 1.10279551479421e-17 |
| MV_Schw | C | 15422 | 1169  | 0 2.24257453277027e-14 |
| MV_Schw | T | 15423 | 564   | 0 1.35952714775048e-06 |
| MV_Schw | A | 15424 | 1264  | 1 4.78339665353882e-14 |
| MV_Schw | C | 15425 | 7537  | 2 1.80464537317491e-90 |
| MV_Schw | A | 15426 | 1789  | 1 1.43113335380753e-20 |
| MV_Schw | G | 15427 | 1814  | 0 1.15490775518100e-22 |
| MV_Schw | G | 15428 | 2680  | 0 8.43144350870855e-34 |
| MV_Schw | G | 15429 | 2909  | 0 8.35474491348776e-37 |
| MV_Schw | A | 15430 | 1039  | 0 1.00985527303858e-12 |
| MV_Schw | G | 15431 | 3248  | 1 3.3203092647898e-39  |
| MV_Schw | T | 15432 | 1647  | 1 9.14884276891666e-19 |
| MV_Schw | T | 15433 | 10240 | 2 .95819321396646e-125 |
| MV_Schw | G | 15434 | 3405  | 1 3.48155407576013e-41 |
| MV_Schw | G | 15435 | 12097 | 9 .24447990347837e-132 |
| MV_Schw | C | 15436 | 3405  | 5 7.56396307713774e-32 |
| MV_Schw | A | 15437 | 6457  | 1 1.55730744900988e-80 |
| MV_Schw | A | 15438 | 791   | 0 2.23197763814646e-09 |
| MV_Schw | G | 15439 | 2628  | 1 2.87805695383316e-31 |
| MV_Schw | A | 15440 | 855   | 1 7.63327059196443e-09 |
| MV_Schw | T | 15441 | 5052  | 1 2.06997985031740e-62 |
| MV_Schw | T | 15442 | 1285  | 0 7.33302200150295e-16 |

|         |   |       |       |                        |
|---------|---|-------|-------|------------------------|
| MV_Schw | C | 15443 | 9070  | 1 .34970006800732e-112 |
| MV_Schw | A | 15444 | 882   | 0 1.55507167487521e-10 |
| MV_Schw | A | 15445 | 3899  | 1 1.94438817915878e-47 |
| MV_Schw | A | 15446 | 5715  | 7 1.39547426317228e-57 |
| MV_Schw | G | 15447 | 2471  | 3 5.57236367757015e-25 |
| MV_Schw | A | 15448 | 31    | 0 1                    |
| MV_Schw | C | 15449 | 2254  | 3 1.87829129264698e-22 |
| MV_Schw | A | 15450 | 610   | 0 4.71258185709977e-07 |
| MV_Schw | A | 15451 | 318   | 0 0.00178409526245752  |
| MV_Schw | C | 15452 | 888   | 0 9.8449641484977e-11  |
| MV_Schw | C | 15453 | 1455  | 0 5.17067991613197e-18 |
| MV_Schw | A | 15454 | 2812  | 3 3.76527399301879e-29 |
| MV_Schw | A | 15455 | 453   | 1 0.000435524603864659 |
| MV_Schw | A | 15456 | 479   | 0 2.04877882921282e-05 |
| MV_Schw | G | 15457 | 2434  | 1 4.07895998831133e-27 |
| MV_Schw | A | 15458 | 219   | 0 0.0328674635647276   |
| MV_Schw | A | 15459 | 849   | 0 3.10265274389703e-10 |
| MV_Schw | G | 15460 | 1240  | 0 3.51525064838207e-15 |
| MV_Schw | T | 15461 | 136   | 0 0.224063006917908    |
| MV_Schw | C | 15462 | 3657  | 1 2.75954009037912e-44 |
| MV_Schw | A | 15463 | 1293  | 0 7.70948583134857e-16 |
| MV_Schw | A | 15464 | 969   | 0 1.02459910771212e-11 |
| MV_Schw | C | 15465 | 8888  | 1 .72225619041859e-110 |
| MV_Schw | A | 15466 | 2126  | 0 1.19532457485376e-26 |
| MV_Schw | A | 15467 | 1690  | 0 5.41292842995679e-21 |
| MV_Schw | G | 15468 | 4795  | 1 3.07742046974763e-57 |
| MV_Schw | G | 15469 | 10707 | 2 .46769825953742e-131 |
| MV_Schw | G | 15470 | 4795  | 3 4.9472571233989e-54  |
| MV_Schw | A | 15471 | 1052  | 0 6.90902325002347e-13 |
| MV_Schw | T | 15472 | 1368  | 0 7.70852204348194e-17 |
| MV_Schw | G | 15473 | 7017  | 1 1.04905428992772e-85 |
| MV_Schw | T | 15474 | 3291  | 0 1.33049726113938e-41 |
| MV_Schw | T | 15475 | 12211 | 1 .57714189301785e-152 |
| MV_Schw | C | 15476 | 3291  | 1 6.31319805717388e-38 |
| MV_Schw | C | 15477 | 12211 | 9 .01506587480638e-132 |
| MV_Schw | A | 15478 | 1868  | 0 2.51480606641377e-23 |

|         |   |       |       |                        |
|---------|---|-------|-------|------------------------|
| MV_Schw | C | 15479 | 13634 | 8.89959483357839e-153  |
| MV_Schw | G | 15480 | 1868  | 1.3.67137536004104e-20 |
| MV_Schw | C | 15481 | 7814  | 1.5.05745995051245e-96 |
| MV_Schw | T | 15482 | 795   | 0.1.41630202140462e-09 |
| MV_Schw | T | 15483 | 165   | 0.0.121895614141351    |
| MV_Schw | A | 15484 | 1314  | 0.3.46015378334414e-16 |
| MV_Schw | C | 15485 | 1234  | 0.3.37927179511424e-15 |
| MV_Schw | C | 15486 | 14267 | 1.51737987103475e-181  |
| MV_Schw | C | 15487 | 1234  | 1.1.55520230764573e-13 |
| MV_Schw | C | 15488 | 1717  | 0.2.54772250834741e-21 |
| MV_Schw | G | 15489 | 1314  | 0.3.46015378334414e-16 |
| MV_Schw | T | 15490 | 556   | 1.3.79071980681320e-05 |
| MV_Schw | A | 15491 | 2004  | 0.5.86221184801153e-25 |
| MV_Schw | T | 15492 | 2370  | 0.8.18424027302492e-30 |
| MV_Schw | T | 15493 | 1120  | 0.1.03021822474116e-13 |
| MV_Schw | G | 15494 | 1153  | 0.5.19942982563649e-14 |
| MV_Schw | G | 15495 | 7711  | 0.5.69387527570341e-99 |
| MV_Schw | T | 15496 | 1661  | 0.1.12986393640154e-20 |
| MV_Schw | A | 15497 | 1112  | 0.1.58359778566520e-13 |
| MV_Schw | A | 15498 | 136   | 0.0.224063006917908    |
| MV_Schw | G | 15499 | 7765  | 1.2.70164452457137e-97 |
| MV_Schw | T | 15500 | 2118  | 0.1.84137703702494e-26 |
| MV_Schw | A | 15501 | 1581  | 1.6.00859124472456e-18 |
| MV_Schw | G | 15502 | 1940  | 0.4.02230639057135e-24 |
| MV_Schw | C | 15503 | 13562 | 1.43668944321523e-172  |
| MV_Schw | A | 15504 | 934   | 0.3.42049946628424e-11 |
| MV_Schw | G | 15505 | 3723  | 0.2.82277081799039e-47 |
| MV_Schw | G | 15506 | 1651  | 1.2.18589210838575e-17 |
| MV_Schw | C | 15507 | 1436  | 0.1.18302803003047e-17 |
| MV_Schw | A | 15508 | 663   | 0.1.04060569930799e-07 |
| MV_Schw | A | 15509 | 1461  | 1.1.74931416524889e-16 |
| MV_Schw | C | 15510 | 14041 | 8.11299764170402e-158  |
| MV_Schw | G | 15511 | 1461  | 2.5.89502701810041e-14 |
| MV_Schw | A | 15512 | 1698  | 0.3.60488956606527e-21 |
| MV_Schw | G | 15513 | 7420  | 0.3.89230914223109e-95 |
| MV_Schw | A | 15514 | 1000  | 1.1.28836692848107e-10 |



|         |   |       |       |                        |
|---------|---|-------|-------|------------------------|
| MV_Schw | A | 15515 | 936   | 0 2.11905405155120e-11 |
| MV_Schw | C | 15516 | 14566 | 3 .48446574199034e-176 |
| MV_Schw | T | 15517 | 525   | 0 4.27807952152774e-06 |
| MV_Schw | T | 15518 | 1060  | 0 7.23020715155605e-13 |
| MV_Schw | A | 15519 | 2109  | 0 2.82988525657064e-26 |
| MV_Schw | T | 15520 | 4066  | 0 8.7734181739147e-52  |
| MV_Schw | A | 15521 | 2785  | 1 3.02161767472501e-33 |
| MV_Schw | T | 15522 | 1172  | 0 2.26350812475368e-14 |
| MV_Schw | C | 15523 | 4151  | 1 5.67618574006514e-49 |
| MV_Schw | T | 15524 | 419   | 0 8.73356503391626e-05 |
| MV_Schw | A | 15525 | 1004  | 0 3.18422806461459e-12 |
| MV_Schw | G | 15526 | 9595  | 1 .45266384105586e-121 |
| MV_Schw | G | 15527 | 5907  | 5 1.01599914058081e-63 |
| MV_Schw | A | 15528 | 1078  | 0 3.21785256543600e-13 |
| MV_Schw | T | 15529 | 1550  | 0 3.68114600279307e-19 |
| MV_Schw | C | 15530 | 1351  | 0 1.09633800307973e-16 |
| MV_Schw | A | 15531 | 5085  | 1 1.02249666623863e-62 |
| MV_Schw | C | 15532 | 10417 | 3 .36896992837717e-124 |
| MV_Schw | C | 15533 | 5085  | 2 2.72548998266867e-59 |
| MV_Schw | C | 15534 | 10417 | 6 .62552163030639e-117 |
| MV_Schw | G | 15535 | 4893  | 2 7.84885238395948e-57 |
| MV_Schw | C | 15536 | 5240  | 0 5.65560410922322e-67 |
| MV_Schw | A | 15537 | 3672  | 0 1.29938457454945e-46 |
| MV_Schw | A | 15538 | 1979  | 1 2.01631320870254e-21 |
| MV_Schw | A | 15539 | 1114  | 1 4.33944728943262e-12 |
| MV_Schw | T | 15540 | 2430  | 1 8.34425461328678e-29 |
| MV_Schw | T | 15541 | 992   | 0 4.68066291936219e-12 |
| MV_Schw | C | 15542 | 5324  | 0 6.09391802873352e-68 |
| MV_Schw | T | 15543 | 2349  | 1 3.54809929360512e-26 |
| MV_Schw | G | 15544 | 11825 | 1 8.1047767476887e-150 |
| MV_Schw | G | 15545 | 3676  | 5 3.61428469716644e-35 |
| MV_Schw | G | 15546 | 2717  | 0 2.65294630606308e-34 |
| MV_Schw | G | 15547 | 4329  | 1 4.23718401842386e-53 |
| MV_Schw | G | 15548 | 11172 | 5 .97734115596845e-128 |
| MV_Schw | C | 15549 | 3890  | 0 1.91518377865977e-49 |
| MV_Schw | A | 15550 | 3424  | 1 2.59618093959318e-41 |

|         |   |       |       |                         |
|---------|---|-------|-------|-------------------------|
| MV_Schw | C | 15551 | 7515  | 2 2.46308753148209e-90  |
| MV_Schw | A | 15552 | 7986  | 2 2.76888089570816e-96  |
| MV_Schw | T | 15553 | 2167  | 1 2.53229759690454e-25  |
| MV_Schw | T | 15554 | 822   | 0 6.61899700876003e-10  |
| MV_Schw | C | 15555 | 9515  | 1 .08205851427121e-120  |
| MV_Schw | T | 15556 | 5986  | 0 1.15876950853474e-76  |
| MV_Schw | T | 15557 | 1048  | 0 1.07409606963816e-12  |
| MV_Schw | C | 15558 | 14453 | 9 .64462522779467e-160  |
| MV_Schw | T | 15559 | 1048  | 1 2.78777662978622e-11  |
| MV_Schw | T | 15560 | 1021  | 1 5.85778760074233e-11  |
| MV_Schw | T | 15561 | 2360  | 0 1.22546356582364e-29  |
| MV_Schw | A | 15562 | 256   | 0 0.0113006909548612    |
| MV_Schw | C | 15563 | 5114  | 5 1.61948606337391e-52  |
| MV_Schw | T | 15564 | 3281  | 1 1.66536008242246e-39  |
| MV_Schw | C | 15565 | 12221 | 13 .44637937879904e-126 |
| MV_Schw | C | 15566 | 3281  | 13 4.48960374255197e-21 |
| MV_Schw | G | 15567 | 2161  | 2 2.24165122401607e-22  |
| MV_Schw | G | 15568 | 7046  | 3 6.28229908639501e-81  |
| MV_Schw | G | 15569 | 4519  | 4 1.14369819573861e-47  |
| MV_Schw | A | 15570 | 800   | 1 3.32019941237771e-08  |
| MV_Schw | A | 15571 | 343   | 0 0.00084477997416832   |
| MV_Schw | C | 15572 | 7903  | 1 4.04047771853375e-99  |
| MV_Schw | A | 15573 | 1967  | 1 1.84916890541443e-21  |
| MV_Schw | A | 15574 | 362   | 0 0.000616568881242944  |
| MV_Schw | A | 15575 | 217   | 0 0.0324730952235072    |
| MV_Schw | A | 15576 | 579   | 0 9.44491436922526e-07  |
| MV_Schw | A | 15577 | 504   | 0 9.48693703037088e-06  |
| MV_Schw | G | 15578 | 1097  | 0 2.24917662333365e-13  |
| MV_Schw | T | 15579 | 161   | 0 0.119516505590852     |
| MV_Schw | T | 15580 | 217   | 0 0.0324730952235072    |
| MV_Schw | G | 15581 | 1213  | 0 7.37267395121326e-15  |
| MV_Schw | A | 15582 | 297   | 0 0.00386997644741331   |
| MV_Schw | T | 15583 | 510   | 0 6.20756007436501e-06  |
| MV_Schw | A | 15584 | 233   | 0 0.0235202211426643    |
| MV_Schw | A | 15585 | 136   | 0 0.224063006917908     |
| MV_Schw | A | 15586 | 300   | 0 0.00254916505180690   |

|         |   |       |       |                         |
|---------|---|-------|-------|-------------------------|
| MV_Schw | T | 15587 | 2002  | 0 5.71669013801564e-25  |
| MV_Schw | A | 15588 | 2124  | 1 7.57962830333327e-25  |
| MV_Schw | A | 15589 | 453   | 1 0.000435524603864659  |
| MV_Schw | G | 15590 | 3915  | 1 5.0299319182489e-46   |
| MV_Schw | T | 15591 | 155   | 0 0.118807954027477     |
| MV_Schw | T | 15592 | 1025  | 0 2.40830256989697e-12  |
| MV_Schw | T | 15593 | 709   | 1 4.42599194690295e-07  |
| MV_Schw | A | 15594 | 1529  | 0 5.14444500435784e-19  |
| MV_Schw | T | 15595 | 453   | 0 4.40680904645487e-05  |
| MV_Schw | C | 15596 | 7948  | 1 1.40331204317665e-99  |
| MV_Schw | C | 15597 | 7554  | 2 8.03542859664366e-91  |
| MV_Schw | A | 15598 | 1174  | 0 2.29510155686448e-14  |
| MV_Schw | G | 15599 | 984   | 0 7.25361238771186e-12  |
| MV_Schw | A | 15600 | 2758  | 1 3.28999759822488e-31  |
| MV_Schw | A | 15601 | 1155  | 0 3.28173089836886e-14  |
| MV_Schw | T | 15602 | 2114  | 0 1.76765427643254e-26  |
| MV_Schw | C | 15603 | 4572  | 0 2.78977712193246e-58  |
| MV_Schw | T | 15604 | 492   | 0 1.41079833334784e-05  |
| MV_Schw | C | 15605 | 2097  | 0 2.52403479188233e-26  |
| MV_Schw | A | 15606 | 3841  | 1 8.35662075887651e-47  |
| MV_Schw | A | 15607 | 3591  | 1 1.78687678720454e-43  |
| MV_Schw | G | 15608 | 1928  | 1 2.21283568991399e-22  |
| MV_Schw | T | 15609 | 2337  | 1 1.88264668088602e-27  |
| MV_Schw | C | 15610 | 2973  | 1 5.09738725668989e-34  |
| MV_Schw | C | 15611 | 12529 | 1 .12506396971460e-156  |
| MV_Schw | G | 15612 | 2973  | 2 1.31833513462435e-32  |
| MV_Schw | G | 15613 | 12529 | 11 .07861444341777e-134 |
| MV_Schw | C | 15614 | 2973  | 1 9.94448538495384e-36  |
| MV_Schw | T | 15615 | 963   | 0 9.88270049862388e-12  |
| MV_Schw | A | 15616 | 2694  | 1 2.20237629956168e-30  |
| MV_Schw | T | 15617 | 581   | 0 9.6272906000911e-07   |
| MV_Schw | C | 15618 | 5698  | 1 9.91131429215906e-71  |
| MV_Schw | T | 15619 | 4329  | 0 4.13085796483177e-55  |
| MV_Schw | G | 15620 | 1841  | 0 5.35558456506106e-23  |
| MV_Schw | A | 15621 | 250   | 0 0.0109496584840517    |
| MV_Schw | T | 15622 | 3595  | 0 1.26235798208266e-45  |

|         |   |       |      |                        |
|---------|---|-------|------|------------------------|
| MV_Schw | A | 15623 | 880  | 1 3.57234895150995e-09 |
| MV_Schw | C | 15624 | 1998 | 1 3.46462231836761e-23 |
| MV_Schw | T | 15625 | 849  | 0 3.10265274389703e-10 |
| MV_Schw | A | 15626 | 209  | 1 0.161035028661221    |
| MV_Schw | G | 15627 | 6393 | 2 5.66196773181111e-76 |
| MV_Schw | A | 15628 | 316  | 0 0.00177078532209268  |
| MV_Schw | C | 15629 | 5157 | 1 9.75866329001969e-64 |
| MV_Schw | T | 15630 | 568  | 0 1.39912799611384e-06 |
| MV_Schw | T | 15631 | 221  | 1 0.166809098130885    |
| MV_Schw | A | 15632 | 252  | 0 0.0110265129960802   |
| MV_Schw | C | 15633 | 1839 | 0 5.35558456506106e-23 |
| MV_Schw | A | 15634 | 3198 | 1 8.63645135942313e-37 |
| MV_Schw | C | 15635 | 1866 | 1 1.49174289969532e-21 |
| MV_Schw | C | 15636 | 717  | 1 2.97684017391012e-07 |
| MV_Schw | A | 15637 | 539  | 0 2.93476087426298e-06 |
| MV_Schw | G | 15638 | 2814 | 0 1.94101295326403e-35 |
| MV_Schw | A | 15639 | 719  | 0 1.41035004331536e-08 |
| MV_Schw | A | 15640 | 1198 | 0 1.05564375061948e-14 |
| MV_Schw | T | 15641 | 440  | 0 6.35446179729703e-05 |
| MV_Schw | A | 15642 | 578  | 0 9.3417185971491e-07  |
| MV_Schw | T | 15643 | 331  | 1 0.00989925601088655  |
| MV_Schw | C | 15644 | 2868 | 3 5.48084767585778e-30 |
| MV_Schw | T | 15645 | 952  | 0 1.45579809233148e-11 |
| MV_Schw | T | 15646 | 527  | 0 4.32916705777071e-06 |
| MV_Schw | C | 15647 | 1260 | 0 1.57627890675026e-15 |
| MV_Schw | G | 15648 | 9422 | 1 .58864516370203e-119 |
| MV_Schw | T | 15649 | 229  | 0 0.0226023994581542   |
| MV_Schw | T | 15650 | 2814 | 1 1.47127764959592e-33 |
| MV_Schw | A | 15651 | 816  | 0 1.02964970836016e-09 |
| MV_Schw | A | 15652 | 407  | 1 0.00184942787214835  |
| MV_Schw | G | 15653 | 2570 | 1 2.04401157405185e-30 |
| MV_Schw | A | 15654 | 2812 | 1 4.63966283133311e-32 |
| MV_Schw | A | 15655 | 2093 | 1 2.59975003672538e-24 |
| MV_Schw | T | 15656 | 269  | 0 0.00793670273477432  |
| MV_Schw | C | 15657 | 884  | 0 9.78067611488631e-11 |
| MV_Schw | T | 15658 | 291  | 0 0.00371697541983835  |

|         |   |       |       |                         |
|---------|---|-------|-------|-------------------------|
| MV_Schw | A | 15659 | 1167  | 1 9.82088728760927e-13  |
| MV_Schw | T | 15660 | 1093  | 1 9.70175998327786e-12  |
| MV_Schw | C | 15661 | 2388  | 0 5.83278699902224e-30  |
| MV_Schw | C | 15662 | 500   | 0 9.17885897222951e-06  |
| MV_Schw | A | 15663 | 397   | 0 0.000190672068197538  |
| MV_Schw | A | 15664 | 368   | 1 0.0052975416620371    |
| MV_Schw | G | 15665 | 9835  | 6 .76091748337229e-110  |
| MV_Schw | T | 15666 | 171   | 0 0.0850400511116103    |
| MV_Schw | C | 15667 | 3783  | 1 5.80999255907908e-46  |
| MV_Schw | A | 15668 | 1025  | 0 2.40830256989697e-12  |
| MV_Schw | G | 15669 | 10891 | 3 .35185597469400e-131  |
| MV_Schw | A | 15670 | 4054  | 2 3.77091953556867e-46  |
| MV_Schw | G | 15671 | 8465  | 4 2.56464930018304e-97  |
| MV_Schw | A | 15672 | 1483  | 1 1.29843789554910e-16  |
| MV_Schw | A | 15673 | 1138  | 1 2.03359517041751e-12  |
| MV_Schw | A | 15674 | 738   | 0 1.01890032122442e-08  |
| MV_Schw | C | 15675 | 14763 | 2 .13146108320965e-182  |
| MV_Schw | A | 15676 | 738   | 1 2.18890405228774e-07  |
| MV_Schw | G | 15677 | 3975  | 3 2.05870352806244e-42  |
| MV_Schw | A | 15678 | 3636  | 1 3.62444160923181e-44  |
| MV_Schw | T | 15679 | 3455  | 1 7.59988633582408e-42  |
| MV_Schw | T | 15680 | 742   | 0 6.53384218923541e-09  |
| MV_Schw | A | 15681 | 1116  | 1 4.42536449101882e-12  |
| MV_Schw | T | 15682 | 2126  | 2 4.29210597337969e-22  |
| MV_Schw | T | 15683 | 1021  | 0 2.27653643184608e-12  |
| MV_Schw | A | 15684 | 10250 | 1 .29232864777922e-127  |
| MV_Schw | T | 15685 | 2091  | 1 2.52389746041873e-24  |
| MV_Schw | G | 15686 | 2661  | 0 1.96068545159088e-33  |
| MV_Schw | A | 15687 | 2221  | 1 5.69798700733499e-26  |
| MV_Schw | C | 15688 | 13281 | 2 .85118088422655e-164  |
| MV_Schw | G | 15689 | 2221  | 1 5.69798700733499e-26  |
| MV_Schw | G | 15690 | 13281 | 5 .14037433601996e-157  |
| MV_Schw | G | 15691 | 2221  | 5 4.55435196693532e-18  |
| MV_Schw | G | 15692 | 1376  | 1 2.51036955986335e-15  |
| MV_Schw | G | 15693 | 1895  | 1 7.20072195106884e-22  |
| MV_Schw | G | 15694 | 13606 | 14 .84930648593281e-141 |

|         |   |       |       |                         |
|---------|---|-------|-------|-------------------------|
| MV_Schw | T | 15695 | 1895  | 1 1.76081042729344e-20  |
| MV_Schw | T | 15696 | 13606 | 5 4.2228902754163e-159  |
| MV_Schw | T | 15697 | 1895  | 6 1.60661066659454e-13  |
| MV_Schw | G | 15698 | 12903 | 3 .45468469288681e-157  |
| MV_Schw | A | 15699 | 1948  | 1 1.60221251718408e-22  |
| MV_Schw | A | 15700 | 2738  | 2 1.09341563418471e-29  |
| MV_Schw | A | 15701 | 2409  | 0 2.60356416535989e-30  |
| MV_Schw | C | 15702 | 13093 | 11 .24446677974887e-141 |
| MV_Schw | G | 15703 | 2409  | 1 5.40054277233111e-27  |
| MV_Schw | T | 15704 | 1149  | 0 4.94429651199561e-14  |
| MV_Schw | G | 15705 | 2953  | 2 2.94177793197155e-32  |
| MV_Schw | A | 15706 | 609   | 1 8.7911389925776e-06   |
| MV_Schw | G | 15707 | 5360  | 5 6.65584395340333e-57  |
| MV_Schw | T | 15708 | 6676  | 2 1.30856237618185e-79  |
| MV_Schw | G | 15709 | 5277  | 1 2.38498396389019e-63  |
| MV_Schw | G | 15710 | 6979  | 3 3.94766286556122e-80  |
| MV_Schw | G | 15711 | 8523  | 4 3.82286803493495e-98  |
| MV_Schw | T | 15712 | 1043  | 1 4.63871118850544e-10  |
| MV_Schw | T | 15713 | 10711 | 3 .67521205771801e-129  |
| MV_Schw | T | 15714 | 944   | 0 2.220022190189e-11    |
| MV_Schw | T | 15715 | 688   | 1 7.98850177308621e-06  |
| MV_Schw | T | 15716 | 432   | 0 6.01062123097195e-05  |
| MV_Schw | A | 15717 | 1221  | 0 4.93556683770453e-15  |
| MV_Schw | A | 15718 | 452   | 0 4.30521864965118e-05  |
| MV_Schw | G | 15719 | 465   | 0 2.97770659573949e-05  |
| MV_Schw | G | 15720 | 2750  | 1 3.06553298775866e-31  |
| MV_Schw | T | 15721 | 1147  | 1 1.37952923390903e-12  |
| MV_Schw | A | 15722 | 194   | 0 0.0651851006268349    |
| MV_Schw | A | 15723 | 76    | 0 0.638894311640422     |
| MV_Schw | C | 15724 | 1269  | 0 1.71562179961932e-15  |
| MV_Schw | A | 15725 | 444   | 0 4.12554725936372e-05  |
| MV_Schw | G | 15726 | 2754  | 1 3.13897432679864e-31  |
| MV_Schw | T | 15727 | 153   | 0 0.169696698380260     |
| MV_Schw | C | 15728 | 942   | 1 5.43280828460996e-10  |
| MV_Schw | A | 15729 | 1316  | 0 3.50283869427904e-16  |
| MV_Schw | A | 15730 | 955   | 1 3.76457667464436e-10  |

|         |   |       |       |                         |
|---------|---|-------|-------|-------------------------|
| MV_Schw | G | 15731 | 8157  | 1 .93605278874475e-100  |
| MV_Schw | G | 15732 | 1004  | 0 3.18422806461459e-12  |
| MV_Schw | A | 15733 | 161   | 0 0.119516505590852     |
| MV_Schw | G | 15734 | 612   | 0 2.96181756638407e-07  |
| MV_Schw | A | 15735 | 134   | 0 0.222853068696264     |
| MV_Schw | C | 15736 | 890   | 0 9.9597307099571e-11   |
| MV_Schw | C | 15737 | 3535  | 3 6.51220261238597e-37  |
| MV_Schw | A | 15738 | 3533  | 1 4.47219904471139e-41  |
| MV_Schw | A | 15739 | 357   | 0 0.000585612254721831  |
| MV_Schw | A | 15740 | 515   | 0 6.41254714073729e-06  |
| MV_Schw | G | 15741 | 9409  | 1 .14182374550723e-116  |
| MV_Schw | A | 15742 | 345   | 0 0.000854432789380146  |
| MV_Schw | A | 15743 | 448   | 0 4.16666940636495e-05  |
| MV_Schw | T | 15744 | 1085  | 0 3.3268996690475e-13   |
| MV_Schw | G | 15745 | 2221  | 1 5.69798700733499e-26  |
| MV_Schw | G | 15746 | 1434  | 1 3.68200191284959e-16  |
| MV_Schw | T | 15747 | 694   | 1 6.30075740030939e-07  |
| MV_Schw | A | 15748 | 1211  | 0 7.28285131302908e-15  |
| MV_Schw | T | 15749 | 702   | 0 3.32019941237771e-08  |
| MV_Schw | A | 15750 | 186   | 0 0.0611551441006359    |
| MV_Schw | A | 15751 | 1231  | 0 5.35847267424091e-15  |
| MV_Schw | G | 15752 | 3897  | 1 1.15286725926223e-45  |
| MV_Schw | T | 15753 | 504   | 1 0.000102077005031043  |
| MV_Schw | T | 15754 | 800   | 1 3.32019941237771e-08  |
| MV_Schw | A | 15755 | 758   | 1 9.88655415781707e-08  |
| MV_Schw | G | 15756 | 14744 | 13 .45468469288681e-157 |
| MV_Schw | T | 15757 | 758   | 0 4.46122942299148e-09  |
| MV_Schw | C | 15758 | 14744 | 5 .66944350871421e-173  |
| MV_Schw | G | 15759 | 758   | 1 9.88655415781707e-08  |
| MV_Schw | G | 15760 | 3064  | 0 8.21916254665585e-39  |
| MV_Schw | A | 15761 | 2318  | 0 3.76082749000994e-29  |
| MV_Schw | T | 15762 | 2680  | 0 8.43144350870855e-34  |
| MV_Schw | A | 15763 | 1134  | 0 7.06627587697053e-14  |
| MV_Schw | C | 15764 | 2355  | 0 1.19046134531737e-29  |
| MV_Schw | A | 15765 | 562   | 0 1.35347886865167e-06  |
| MV_Schw | G | 15766 | 2926  | 1 4.60326300784119e-35  |

|         |   |       |       |    |                      |
|---------|---|-------|-------|----|----------------------|
| MV_Schw | T | 15767 | 824   | 0  | 6.670184087413e-10   |
| MV_Schw | G | 15768 | 1141  | 1  | 2.09603951893057e-12 |
| MV_Schw | C | 15769 | 6459  | 3  | 1.43992799263419e-73 |
| MV_Schw | C | 15770 | 2376  | 1  | 6.02189467572319e-28 |
| MV_Schw | C | 15771 | 8056  | 0  | .74375658359506e-103 |
| MV_Schw | T | 15772 | 1265  | 1  | 4.78339665353882e-14 |
| MV_Schw | G | 15773 | 2333  | 0  | 2.59843691596567e-29 |
| MV_Schw | A | 15774 | 1484  | 1  | 8.2192577664273e-17  |
| MV_Schw | T | 15775 | 1324  | 0  | 2.34469629054453e-16 |
| MV_Schw | T | 15776 | 1928  | 0  | 3.668316480965e-24   |
| MV_Schw | A | 15777 | 266   | 0  | 0.00770605171892268  |
| MV_Schw | A | 15778 | 229   | 0  | 0.0226023994581542   |
| MV_Schw | G | 15779 | 3709  | 3  | 5.32863980756963e-39 |
| MV_Schw | G | 15780 | 6300  | 0  | 1.26450122024779e-80 |
| MV_Schw | A | 15781 | 161   | 0  | 0.119516505590852    |
| MV_Schw | C | 15782 | 2231  | 0  | 5.62394803842332e-28 |
| MV_Schw | T | 15783 | 103   | 0  | 0.37877131423274     |
| MV_Schw | A | 15784 | 442   | 0  | 6.5293982278993e-05  |
| MV_Schw | A | 15785 | 901   | 0  | 6.76904842423203e-11 |
| MV_Schw | T | 15786 | 610   | 0  | 4.71258185709977e-07 |
| MV_Schw | T | 15787 | 1132  | 0  | 7.01279171988479e-14 |
| MV_Schw | G | 15788 | 1870  | 1  | 3.7234390159465e-20  |
| MV_Schw | G | 15789 | 2477  | 2  | 1.89496836347045e-26 |
| MV_Schw | T | 15790 | 622   | 0  | 3.17009982605109e-07 |
| MV_Schw | T | 15791 | 862   | 1  | 7.79520521752933e-08 |
| MV_Schw | G | 15792 | 1928  | 3  | 1.76655131501837e-18 |
| MV_Schw | A | 15793 | 188   | 0  | 0.0618213834362716   |
| MV_Schw | A | 15794 | 359   | 0  | .000592673955321161  |
| MV_Schw | C | 15795 | 9424  | 9  | 3.82403457226831e-98 |
| MV_Schw | T | 15796 | 919   | 1  | 1.89974641019491e-08 |
| MV_Schw | C | 15797 | 3748  | 1  | 1.16486266627510e-45 |
| MV_Schw | C | 15798 | 3977  | 1  | 1.24893153691288e-46 |
| MV_Schw | G | 15799 | 11525 | 3  | .78824317388073e-138 |
| MV_Schw | G | 15800 | 3977  | 27 | 1.87405953486337e-15 |
| MV_Schw | A | 15801 | 1145  | 0  | 4.82752944537975e-14 |
| MV_Schw | A | 15802 | 3194  | 1  | 8.31116717306978e-37 |



|         |   |       |       |                        |
|---------|---|-------|-------|------------------------|
| MV_Schw | C | 15803 | 5324  | 0 6.09391802873352e-68 |
| MV_Schw | C | 15804 | 1159  | 0 3.30433304089073e-14 |
| MV_Schw | C | 15805 | 3577  | 1 2.58736475179177e-43 |
| MV_Schw | T | 15806 | 413   | 0 0.000133300218778950 |
| MV_Schw | A | 15807 | 3601  | 1 1.17483476001736e-43 |
| MV_Schw | A | 15808 | 3634  | 1 3.61233418019163e-44 |
| MV_Schw | T | 15809 | 6378  | 1 2.05603671975324e-77 |
| MV_Schw | C | 15810 | 3924  | 0 6.02695415019885e-50 |
| MV_Schw | C | 15811 | 1548  | 0 3.60885625981918e-19 |
| MV_Schw | T | 15812 | 281   | 0 0.0054651270080729   |
| MV_Schw | G | 15813 | 15221 | 5 .34022921562025e-179 |
| MV_Schw | C | 15814 | 281   | 7 1                    |
| MV_Schw | C | 15815 | 1820  | 1 7.1738075641003e-21  |
| MV_Schw | C | 15816 | 938   | 1 5.39000209393764e-10 |
| MV_Schw | T | 15817 | 145   | 0 0.161503851613234    |
| MV_Schw | A | 15818 | 159   | 0 0.118907467124559    |
| MV_Schw | G | 15819 | 760   | 1 9.96079130053354e-08 |
| MV_Schw | G | 15820 | 1585  | 1 1.38977971358033e-16 |
| MV_Schw | T | 15821 | 198   | 0 0.0437447203304695   |
| MV_Schw | G | 15822 | 283   | 0 0.00556765375547531  |
| MV_Schw | G | 15823 | 393   | 0 0.000187001822184258 |
| MV_Schw | T | 15824 | 196   | 0 0.0437133877334182   |
| MV_Schw | T | 15825 | 132   | 1 0.983041048229953    |
| MV_Schw | A | 15826 | 362   | 0 0.000616568881242944 |
| MV_Schw | G | 15827 | 347   | 1 0.00709075117762907  |
| MV_Schw | G | 15828 | 295   | 0 0.00380085379408682  |
| MV_Schw | C | 15829 | 1107  | 3 7.32743644060239e-09 |
| MV_Schw | A | 15830 | 919   | 1 1.17074507218211e-09 |
| MV_Schw | T | 15831 | 89    | 0 0.497615650989996    |
| MV_Schw | T | 15832 | 147   | 0 0.162686550333688    |
| MV_Schw | A | 15833 | 124   | 1 0.791667533131283    |
| MV_Schw | T | 15834 | 254   | 0 0.0111350404952786   |
| MV_Schw | T | 15835 | 54    | 0 0.950262622850522    |
| MV_Schw | T | 15836 | 256   | 0 0.0113006909548612   |
| MV_Schw | G | 15837 | 702   | 1 5.6152308324071e-06  |
| MV_Schw | C | 15838 | 1405  | 3 3.28208046953693e-12 |

|         |   |       |       |    |                       |
|---------|---|-------|-------|----|-----------------------|
| MV_Schw | A | 15839 | 729   | 1  | 2.06497902518973e-07  |
| MV_Schw | A | 15840 | 76    | 1  | 1                     |
| MV_Schw | T | 15841 | 205   | 0  | 0.0461495798537483    |
| MV_Schw | A | 15842 | 12    | 0  | 1                     |
| MV_Schw | T | 15843 | 27    | 0  | 1                     |
| MV_Schw | A | 15844 | 47    | 0  | 1                     |
| MV_Schw | T | 15845 | 45    | 0  | 1                     |
| MV_Schw | T | 15846 | 23    | 0  | 1                     |
| MV_Schw | A | 15847 | 37    | 0  | 1                     |
| MV_Schw | A | 15848 | 180   | 0  | 0.090192830807046     |
| MV_Schw | A | 15849 | 16    | 0  | 1                     |
| MV_Schw | G | 15850 | 436   | 0  | 6.10735657108213e-05  |
| MV_Schw | A | 15851 | 41    | 0  | 1                     |
| MV_Schw | A | 15852 | 8     | 0  | 1                     |
| MV_Schw | A | 15853 | 48    | 0  | 0.950262622850522     |
| MV_Schw | A | 15854 | 17    | 0  | 1                     |
| MV_Schw | C | 15855 | 907   | 1  | 1.72383812455390e-09  |
| MV_Schw | T | 15856 | 27    | 0  | 1                     |
| MV_Schw | T | 15857 | 70    | 1  | 1                     |
| MV_Schw | T | 15858 | 217   | 0  | 0.0324730952235072    |
| MV_Schw | G | 15859 | 510   | 0  | 6.20756007436501e-06  |
| MV_Schw | A | 15860 | 64    | 0  | 0.789229943133706     |
| MV_Schw | A | 15861 | 174   | 0  | 0.086185329188849     |
| MV_Schw | A | 15862 | 254   | 0  | 0.0111350404952786    |
| MV_Schw | A | 15863 | 41    | 0  | 1                     |
| MV_Schw | T | 15864 | 248   | 0  | 0.0109464716562247    |
| MV_Schw | A | 15865 | 99    | 0  | 0.509396577320122     |
| MV_Schw | C | 15866 | 1021  | 1  | 5.85778760074233e-11  |
| MV_Schw | G | 15867 | 977   | 1  | 1.76210449604909e-10  |
| MV_Schw | A | 15868 | 72    | 0  | 0.791667533131283     |
| MV_Schw | A | 15869 | 1434  | 1  | 3.68200191284959e-16  |
| MV_Schw | G | 15870 | 550   | 1  | 0.000258707850272448  |
| MV_Schw | T | 15871 | 97    | 0  | 0.503192867159235     |
| MV_Schw | T | 15872 | 132   | 1  | 0.983041048229953     |
| MV_Schw | T | 15873 | 2725  | 1  | 6.49796247773351e-31  |
| MV_Schw | C | 15874 | 12777 | 15 | 0.05796106579061e-129 |

|         |    |       |     |   |                      |
|---------|----|-------|-----|---|----------------------|
| MV_Schw | T  | 15875 | 816 | 0 | 1.02964970836016e-09 |
| MV_Schw | A  | 15876 | 984 | 1 | 1.82320496414826e-10 |
| MV_Schw | T  | 15877 | 215 | 0 | 0.0320573639632113   |
| MV_Schw | T  | 15878 | 58  | 0 | 0.953489044526869    |
| MV_Schw | C  | 15879 | 8   | 0 | 1                    |
| MV_Schw | C  | 15880 | 174 | 1 | 0.344829637188882    |
| MV_Schw | C  | 15881 | 171 | 0 | 0.0850400511116103   |
| MV_Schw | A  | 15882 | 647 | 1 | 2.90812074462522e-06 |
| MV_Schw | G  | 15883 | 248 | 0 | 0.0109464716562247   |
| MV_Schw | C  | 15884 | 37  | 0 | 1                    |
| MV_Schw | T  | 15885 | 10  | 0 | 1                    |
| MV_Schw | T  | 15886 | 4   | 0 | 1                    |
| MV_Schw | NA | 15887 | 0   | 0 | NA                   |
| MV_Schw | G  | 15888 | 25  | 0 | 1                    |
| MV_Schw | NA | 15889 | 0   | 0 | NA                   |
| MV_Schw | C  | 15890 | 16  | 0 | 1                    |
| MV_Schw | T  | 15891 | 8   | 0 | 1                    |
| MV_Schw | G  | 15892 | 4   | 1 | 0.619556855087002    |
| MV_Schw | G  | 15893 | 2   | 1 | 0.0802641948298692   |
| MV_Schw | T  | 15894 | 12  | 0 | 1                    |
